# Supplementary material
Source: PubMed Central journal article supplement (PMC6726477)
Supplement: EMS83661-supplement-Supplementary_Table_Legends.pdf [file EMS83661-supplement-Supplementary_Table_Legends.pdf]

775 **SUPPLEMENTARY INFORMATION**

776

777 **Supplementary Table 1: shRNA tumor suppressor library used for the 3D screen.**

778 TRC numbers, oligo sequences, clone names, reference sequences, and gene names of the  
779 shRNA constructs used for the 3D cell fate screen in PHBECs.

780

781

782 **Supplementary Table 2: Raw data of the 3D screen.**

783 Excel file containing results of K14 and K19 immunofluorescent staining as well as  
784 morphological parameters (number and size of spheres) of all shRNA conditions. Marker 1 =  
785 K14, Marker 2 = K19.

786

787

788 **Supplementary Table 3: Results of redundant shRNA analysis (RSA) of the 3D screen.**

789 Excel file containing results of RSA analysis of the number of spheres as well as the number  
790 of double-positive cells.

791

792

793 **Supplementary Table 4: Differentially regulated genes in PHBECs upon removal of**  
794 **LATS.**

795 Excel file of the significantly differentially regulated genes in the contrast shLATS versus  
796 shNT at a cut-off of fold-change (FC) >2.0, expression value >4.0, adjusted  $P < 0.01$ .

797

798

799 **Supplementary Table 5: Differentially regulated genes in MCF10A cells upon removal**  
800 **of LATS and/or expression of YAP, TAZ and ER $\alpha$ .**

801 Excel file of the significantly differentially regulated genes at a cut-off of fold-change (FC)  
802 >2.0, expression value >4.0, adjusted  $P < 0.01$ .

803

804

805 **Supplementary Table 6: ER $\alpha$  interactome in luminal breast cancer cells with and**  
806 **without LATS1.**

807 Excel file of ratios of ER $\alpha$  interacting proteins in the presence or absence of LATS1.
