# Supplementary material
Source: PubMed Central journal article supplement (PMC6726477)
Supplement: EMS83661-supplement-table-Dataset.pdf [file EMS83661-supplement-table-Dataset.pdf]

**TRC Number**

TRCN0000000229  
TRCN0000000230  
TRCN0000000231  
TRCN0000000232  
TRCN0000000233  
TRCN0000000362  
TRCN0000000363  
TRCN0000000364  
TRCN0000000365  
TRCN0000000789  
TRCN0000000790  
TRCN0000000791  
TRCN0000000793  
TRCN0000000880  
TRCN0000000881  
TRCN0000000882  
TRCN0000000883  
TRCN0000000884  
TRCN0000001114  
TRCN0000001115  
TRCN0000001116  
TRCN0000001117  
TRCN0000001776  
TRCN0000001777  
TRCN0000001778  
TRCN0000001779  
TRCN0000001780  
TRCN0000002347  
TRCN0000002348  
TRCN0000002349  
TRCN0000002350  
TRCN0000002351  
TRCN0000002745  
TRCN0000002746  
TRCN0000002747  
TRCN0000002748  
TRCN0000002749  
TRCN0000003753  
TRCN0000003754  
TRCN0000003755  
TRCN0000003756  
TRCN0000005322  
TRCN0000005323  
TRCN0000005324  
TRCN0000005325  
TRCN0000005326  
TRCN0000006502  
TRCN0000006503  
TRCN0000006504  
TRCN0000006506  
TRCN0000006507  
TRCN0000006508

TRCN0000006509  
TRCN0000006511  
TRCN0000008704  
TRCN0000008705  
TRCN0000008706  
TRCN0000008707  
TRCN0000008708  
TRCN0000008728  
TRCN0000008729  
TRCN0000008730  
TRCN0000008731  
TRCN0000013498  
TRCN0000013499  
TRCN0000013500  
TRCN0000013501  
TRCN0000013502  
TRCN0000014633  
TRCN0000014634  
TRCN0000014635  
TRCN0000014636  
TRCN0000014637  
TRCN0000014688  
TRCN0000014689  
TRCN0000014690  
TRCN0000014691  
TRCN0000014692

TRCN0000014943  
TRCN0000014944  
TRCN0000014945  
TRCN0000014946  
TRCN0000014947  
TRCN0000014974  
TRCN0000014975  
TRCN0000014977  
TRCN0000015648  
TRCN0000015649  
TRCN0000015650  
TRCN0000015652  
TRCN0000016003  
TRCN0000016004  
TRCN0000016005  
TRCN0000016006  
TRCN0000016007  
TRCN0000016138  
TRCN0000016139  
TRCN0000016140  
TRCN0000016141  
TRCN0000016142  
TRCN0000018875  
TRCN0000018876  
TRCN0000018877  
TRCN0000018879

TRCN0000019539  
TRCN0000019541  
TRCN0000019542  
TRCN0000019543  
TRCN0000020069  
TRCN0000020070  
TRCN0000020071  
TRCN0000020072  
TRCN0000020073  
TRCN0000021125  
TRCN0000021126  
TRCN0000021127  
TRCN0000021128  
TRCN0000029204  
TRCN0000029205  
TRCN0000029206  
TRCN0000029207  
TRCN0000029208  
TRCN0000033469  
TRCN0000033470  
TRCN0000033471  
TRCN0000033473  
TRCN0000038024  
TRCN0000038025  
TRCN0000038026  
TRCN0000038027  
TRCN0000038028  
TRCN0000038029  
TRCN0000038031  
TRCN0000038032  
TRCN0000038033  
TRCN0000038034  
TRCN0000038035  
TRCN0000038036  
TRCN0000038037  
TRCN0000038038  
TRCN0000038040  
TRCN0000038042  
TRCN0000038043  
TRCN0000038044  
TRCN0000038045  
TRCN0000038046  
TRCN0000038047  
TRCN0000038048  
TRCN0000038049  
TRCN0000038050  
TRCN0000038051  
TRCN0000038052  
TRCN0000038053  
TRCN0000038054  
TRCN0000038055  
TRCN0000038056  
TRCN0000038057

TRCN0000038058

TRCN0000038059

TRCN0000038060

TRCN0000038061

TRCN0000038062

TRCN0000038063

TRCN0000038064

TRCN0000038065

TRCN0000038066

TRCN0000038067

TRCN0000038068

TRCN0000038070

TRCN0000038071

TRCN0000038072

TRCN0000038073

TRCN0000038074

TRCN0000038075

TRCN0000038076

TRCN0000038078

TRCN0000038079

TRCN0000038080

TRCN0000038081

TRCN0000038082

TRCN0000038083

TRCN0000038084

TRCN0000038085

TRCN0000038086

TRCN0000038087

TRCN0000038088

TRCN0000038089

TRCN0000038090

TRCN0000038091

TRCN0000038092

TRCN0000038093

TRCN0000038094

TRCN0000038095

TRCN0000038096

TRCN0000038097

TRCN0000038098

TRCN0000038099

TRCN0000038100

TRCN0000038101

TRCN0000038102

TRCN0000038103

TRCN0000038104

TRCN0000038105

TRCN0000038106

TRCN0000038107

TRCN0000038108

TRCN0000038109

TRCN0000038110

TRCN0000038112

TRCN0000038113  
TRCN0000038119  
TRCN0000038120  
TRCN0000038121  
TRCN0000038122  
TRCN0000038123  
TRCN0000038165  
TRCN0000038166  
TRCN0000038167  
TRCN0000038168  
TRCN0000038684  
TRCN0000038685  
TRCN0000038686  
TRCN0000038687  
TRCN0000038688  
TRCN0000038720  
TRCN0000038721  
TRCN0000038722  
TRCN0000038723  
TRCN0000038729  
TRCN0000038730  
TRCN0000038731  
TRCN0000038732  
TRCN0000038733  
TRCN0000039623  
TRCN0000039624  
TRCN0000039625  
TRCN0000039626

TRCN0000039628  
TRCN0000039629  
TRCN0000039630  
TRCN0000039631  
TRCN0000039632  
TRCN0000039663  
TRCN0000039664  
TRCN0000039665  
TRCN0000039666  
TRCN0000039667  
TRCN0000039668  
TRCN0000039669  
TRCN0000039670  
TRCN0000039671  
TRCN0000039672  
TRCN0000039678  
TRCN0000039679  
TRCN0000039680  
TRCN0000039681  
TRCN0000039682  
TRCN0000039713  
TRCN0000039714  
TRCN0000039715  
TRCN0000039716

TRCN0000039717  
TRCN0000039748  
TRCN0000039749  
TRCN0000039750  
TRCN0000039752  
TRCN0000039813  
TRCN0000039814  
TRCN0000039815  
TRCN0000039816  
TRCN0000039817  
TRCN0000039833  
TRCN0000039834  
TRCN0000039835  
TRCN0000039836  
TRCN0000039837  
TRCN0000039973  
TRCN0000039974  
TRCN0000039975  
TRCN0000039976  
TRCN0000039977  
TRCN0000040008  
TRCN0000040009  
TRCN0000040010  
TRCN0000040011  
TRCN0000040012  
TRCN0000040028  
TRCN0000040029  
TRCN0000040030  
TRCN0000040031  
TRCN0000040032  
TRCN0000040038  
TRCN0000040039  
TRCN0000040040  
TRCN0000040041  
TRCN0000040042  
TRCN0000040048  
TRCN0000040049  
TRCN0000040050  
TRCN0000040051  
TRCN0000040052  
TRCN0000040053  
TRCN0000040054  
TRCN0000040055  
TRCN0000040056  
TRCN0000040057  
TRCN0000040063  
TRCN0000040064  
TRCN0000040065  
TRCN0000040066  
TRCN0000040067  
TRCN0000040068  
TRCN0000040069  
TRCN0000040070

TRCN0000040071  
TRCN0000040072

TRCN0000040093  
TRCN0000040094  
TRCN0000040095  
TRCN0000040096  
TRCN0000040097  
TRCN0000040138  
TRCN0000040139  
TRCN0000040140  
TRCN0000040141  
TRCN0000040142  
TRCN0000009825  
TRCN0000010306  
TRCN0000010400  
TRCN0000010401  
TRCN0000010417  
TRCN0000010419  
TRCN0000009967  
TRCN0000009968  
TRCN0000009969  
TRCN0000009970  
TRCN0000009971

TRCN0000040098  
TRCN0000040099  
TRCN0000040100  
TRCN0000040101  
TRCN0000040102  
TRCN0000018959  
TRCN0000018960  
TRCN0000018961  
TRCN0000018962  
TRCN0000018963  
TRCN0000021798

## Oligo Sequence

CCGGCCAGAGTGCAAGCCAGAAATTCTCGAGAATTTCTGGCTTGCACTCTGGTTTTT  
CCGGCTTTGTAATCATCCAGCTCTACTCGAGTAGAGCTGGATGATTACAAAGTTTTT  
CCGGCCTGGATTATATTCTGGCGGTCTCGAGACCGCCAGAATATAATCCAGTTTTT  
CCGGGTGAAGATTGAGCAGGTCGTTCTCGAGAACGACCTGCTCAATCTTCACTTTTT  
CCGGGTCCATTAAGAAGCGAGCCAACTCGAGTTGGCTCGCTTCTTAATGGACTTTTT  
CCGGCCTTCCCATTTCTCTACACTACTCGAGTAGTGTAGAGAAATGGGAAGTTTTT  
CCGGCCTAGATTTCTTCATGCCAACTCGAGTTGGCATGAAGGAAATCTAGGTTTTT  
CCGGGAAATTGGTGTCCGGTGCCTATCTCGAGATAGGCACCGACACCAATTTCTTTTT  
CCGGAGGACATATCTGGACAAGGCACTCGAGTGCCTTGTCCAGATATGTCCTTTTTT  
CCGGCAAGAGTTACACGTTCTGATCTCGAGATCAGGAACGTGTAACCTTTGTTTTT  
CCGGCTGACCAACTCGTGTGTGAACTCGAGTTTCACACACGAGTTGGTCAGTTTTT  
CCGGCGAGGAATTTGAGATAGAGCTCTCGAGAGCTCTATCTCAAATTCCTCGTTTTT  
CCGGAGAGCCAGAAGCAACAAAGATCTCGAGATCTTTGTTGCTTCTGGCTCTTTTTT  
CCGGCCGTCGATTACTTCACTTGAAGTCAAGTGAAGTAATCGACGGTTTTT  
CCGGGCCATGAAGACCCTAAGGAACTCGAGTTTCTTAGGGTCTTCATGGCTTTTT  
CCGGCCTCTGGGATGATGTGTCTAACTCGAGTTAGACACATCATCCCAGAGTTTTT  
CCGGCAGGACCAACAGTGACACTTCTCGAGAAGTGTCACTGTTTGGTCTGTTTTT  
CCGGTACTCGCCATACGCCTTTAACTCGAGTTAAAGGCGTATGGCGAGTAGTTTTT  
CCGGGTGTCTGCTAATGTAACTTTCTCGAGAAAGTTTACATTAGCAGACACTTTTT  
CCGGCCCAACCACTCATTCAAGCATCTCGAGATGCTTGAATGAGTGGTTGGGTTTTT  
CCGGGCCGCTCACTCCTTCATCAACTCGAGTTGATGAAGGAGTGAGGCGGCTTTTT  
CCGGGAAACCATAACAGTGTGACTTCTCGAGAAGTCACACTGGTATGGTTTCTTTTT  
CCGGGAAGATAAAGACACTAGGAATCTCGAGATTCTAGTGTCTTTATCTTCTTTTT  
CCGGCACGGCAAGATAGCATGGATTCTCGAGAATCCATGCTATCTTGCCGTGTTTTT  
CCGGGTCTGCTTCATACATTCTAACTCGAGTTAGGAATGTATGAAGCAGACTTTTT  
CCGGCAAGTCAGAAATCCACCCAACTCGAGTTTGGGTGGATTTCTGACTTGTTTTT  
CCGGGAGAAATTAAGCCATCGTGTCTCGAGAACACGATGGCTTAATTTCTTTTTT  
CCGGCGGCTGCTAAAGAACAAGAACTCGAGTTTCTTGTCTTTAGCAGCCGTTTTT  
CCGGGCCAAGGAACGATACGACAACTCGAGTTTGTCTATCGTTCCTTGGCTTTTT  
CCGGCCACCTCCAGTAGTAAATTAATCTCGAGATAATTTACTACTGGAGGTGGTTTTT  
CCGGGAGAGCAAGTAGAAAGAGGATCTCGAGATCCTCTTTCTACTTGCTCTTTTT  
CCGGCAGTATGTATTGGCGTTGAACTCGAGTTTCAACGCCAATACATACTGTTTTT  
CCGGAGGCGCTATGTGTATTATTATCTCGAGATAATAATACACATAGCGCCTTTTTT  
CCGGCCACAGCTAGAACTTATCAAACCTTTCTCGAGAAAGGTTTGTAAAGTTCTAGCTGTGGTTTTT  
CCGGCTAGAACTTATCAAACCTTTCTCGAGAAAGGTTTGTAAAGTTCTAGTTTTT  
CCGGCGTGCAGATAATGACAAGGAACTCGAGTTTCTTGTATTATCTGCACGTTTTT  
CCGGCCACAAATGAAGGGATATAAACTCGAGTTTATATCCCTTCATTTGTGGTTTTT  
CCGGCGGCGCACAGAGGAAGAGAATCTCGAGATTCTTCTCTGTGCGCCGTTTTT  
CCGGTCAGACCTATGGAACTACTTCTCGAGAAGTAGTTTCCATAGGTCTGATTTTT  
CCGGGTCCAGATGAAGCTCCAGAACTCGAGTTTCTGGGAGCTTCATCTGGACTTTTT  
CCGGCACCATCCACTACAACACTACATCTCGAGATGTAGTTGTAGTGGATGGTGTTTTT  
CCGGCGTCATGTTCTGGTTTGAGATCTCGAGATCTCAAACCAGAACATGACGTTTTT  
CCGGCCCATGAACTACAACAGCTATCTCGAGATAGCTGTTGTAGTTCATGGGTTTTT  
CCGGGCACAAACGATCAGTAAGAACTCTCGAGATTCTTACTGATCGTTTGTGCTTTTT  
CCGGCCCTTCTGACATCTCCTACATCTCGAGATGTAGGAGATGTCAGAAGGGTTTTT  
CCGGGCTGTTGTACACCTCAGTTACTCGAGTAACTGAGGTGTGACAACAGCTTTTT  
CCGGGCCACATCAAACCTTTGAGTACTCGAGTACTCAAAGGTTTGTATGTGGCTTTTT  
CCGGCCTAGTCAATTTGATTCGAGTACTCGAGTACTCGAATCAAATGACTAGGTTTTT  
CCGGGAGTGGAATGACTTCAACTTTCTCGAGAAAGTTGAAGTCATTCCACTTTTTT  
CCGGCCGTTTCGTCAGAACACACATCTCGAGATGTGTGTTCTGACGAAACGGTTTTT  
CCGGCTCTCCTTCTGTGTGTCCAACCTCGAGTTGGACACACAGGAAGGAGAGTTTTT  
CCGGCCCGCTCTTGAAGAACTCTACTCGAGTAGAGTTTCTTCAAGAGCGGGTTTTT



CCGGGTGTCCAACTGCATCGAGTACTCGAGTACTCGATGCAGTTTGGACACTTTTT  
CCGGCCAAGGGTTACAGAGCATTTACTCGAGTAAATGCTCTGTAACCCTTGGTTTTT  
CCGGGCTCTGAACCTTCTTTGTTAACTCGAGTTAAACAAAGAAGGTTTCAGAGCTTTTT  
CCGGCCACAGTTCAAGAAGTGGATTCTCGAGAATCCAGTTCTTGAAGTGTGTTTTT  
CCGGCCAGGGTCAAATCTGCCATAACTCGAGTTATGGCAGATTTGACCCTGGTTTTT  
CCGGGCATCATTACTCTAGCTCAAACCTCGAGTTTGGAGCTAGAGTAATGATGCTTTTT  
CCGGCCAGTGCATCACAGAACACAACCTCGAGTTGTGTTCTGTGATGCACTGGTTTTT  
CCGGCCTAGAATGATGTGTTTTCTATCTCGAGATAGAAACACATCATTCTAGGTTTTT  
CCGGCCTCTTAATAACCATGCTTACTCGAGTAAGCATGGTTATTAAAGAGGTTTTT  
CCGGGCTCCCTTAGAAATAGGTCTTCTCGAGAAGACCTATTTCTAAGGGAGCTTTTT  
CCGGGCTGCCTATAACAGATACGATCTCGAGATCGTATCTGTTATAGGCAGCTTTTT  
CCGGGCTCAGAATTTGTTAGCAATACTCGAGTATTGCTAACAAATTCTGAGCTTTTT  
CCGGGCCGAAATAGAAGTGGATGAACTCGAGTTCATCCACTTCTATTTCCGGCTTTTT  
CCGGGCAGCATTCTATCAGGCTCTTCTCGAGAAGAGCCTGATAGAATGCTGCTTTTT  
CCGGCCACTAGAGTCCCAAAGTATCTCGAGATACTTTGGGACTCTAGGTGGTTTTT  
CCGGGCAATCTGGAACGGGACTATTCTCGAGAATAGTCCCGTCCAGATTGCTTTTT  
CCGGGCTGTGCAAGAAACGCCTCAAACCTCGAGTTGAGGCGTTTCTTGACAGCTTTTT  
CCGGTCTCCTCTATCGCTGGATGAACTCGAGTTCATCCAGCGATAGAGGAGATTTTT  
CCGGCGCACAGCAACGCAACCTCATCTCGAGATGAGGTTGCGTTGCTGTGCGTTTTT  
CCGGGCTGGCGCAGACCACGCACTTCTCGAGAAGTGCCTGGTCTGCGCCAGCTTTTT  
CCGGCGTGGTGCAGAACGCCCTCTTCTCGAGAAGAGGGCGTTCTGCACCACGTTTTT  
CCGGGCCCAGCATTGGGTAATTTACTCGAGTAAATTACCCAAATGCTGGGCTTTTT  
CCGGCCCTATGTTACCACCAACAACCTCGAGTTGTTGGTGGTGAACATAGGGTTTTT  
CCGGGCTCAGCAAGAATGAGATCCTCTCGAGAGGATCTCATTCTTGCTGAGCTTTTT  
CCGGCACCAACAACATCGAGTGAACCTCGAGTTCACTCGATTGTTGGTGGTGTTTTT  
CCGGCCTGCTGAACGGCGTCGCCAACTCGAGTTGGCGACGCCGTTCCAGCAGGTTTTT

CCGGCAGACTCGATTTCATATTGAATCTCGAGATTCAATATGAATCGAGTCTGTTTTT  
CCGGCCCATCAACATGGAAGACCAACTCGAGTTGGTCTTCCATGTTGATGGGTTTTT  
CCGGCACGACTACAACTCCTGAAACTCGAGTTTCAGGAGTTTGTAGTCGTGTTTTT  
CCGGGAAGACCAAGAGCGCATCAAACCTCGAGTTTGTAGTCGTGTAGAGAGTTTTT  
CCGGCTCTCTACACGACTACAACTCGAGTTTGTAGTCGTGTAGAGAGTTTTT  
CCGGGCGCCTGGAAGAGAAAGTGAACCTCGAGTTCACTTTCTCTTCCAGGCGCTTTTT  
CCGGTGGAGGATTTACACAAGCAGACTCGAGTCTGCTTGTGTAATCCTCCATTTTT  
CCGGGCTGACGCTGAGCCTGAGTGACTCGAGTCACTCAGGCTCAGCGTCAGCTTTTT  
CCGGCCCTAACTTTGGCCTTTGTTCTCGAGAACAAAGGCCAAAGTTTAGGGTTTTT  
CCGGCCTTCTCCAATCAGCTAGAACTCGAGTTTCTAGCTGATTGGAGAAGGTTTTT  
CCGGCAGCAACATGATGAGCCTGAACTCGAGTTCAGGCTCATCATGTTGCTGTTTTT  
CCGGCTACATCAAGGTCAGCCAGAACTCGAGTTCTGGCTGACCTTGATGTAGTTTTT  
CCGGGCTGGTAGTTAGTAGCATGTTCTCGAGAACATGCTACTAACTACCAGCTTTTT  
CCGGGCGGAGACAGACCAACTAGAACTCGAGTTCTAGTTGGTCTGTCTCCGCTTTTT  
CCGGCACTGCTTACACGTCTTCTTCTCGAGAAGGAAGACGTGTAAGCAGTGTTTTT  
CCGGGTGGAACAGTTATCTCCAGAACTCGAGTTCTGGAGATAACTGTTCCACTTTTT  
CCGGTCTGCTTTGCAGACCGAGATTCTCGAGAACTCGGTCTGCAAAGCAGATTTTT  
CCGGGCAGTGAGTATTGGAAGACTTCTCGAGAAGTCTTCCAATACTCACTGCTTTTT  
CCGGCAGCAGAAATCCGGGTAGATCTCGAGATCTACCCGGAATTTCTGCTGTTTTT  
CCGGGCGCTCTGTCATCAAGCCCATCTCGAGATGGGCTTGATGACAGAGCGCTTTTT  
CCGGCACCTCCATGTCCAACCCATACTCGAGTATGGGTTGGACATGGAGGTGTTTTT  
CCGGCACGGCCCAGTGTGCAAGATTCTCGAGAATCTTGACACTGGGCCGTGTTTTT  
CCGGGCTAAGACTAACTCAAGATAACTCGAGTTATCTTGAGTTAGTCTTAGCTTTTT  
CCGGCGCCCTTTACAGAACAGACTACTCGAGTAGTCTGTTCTGTAAAGGGCGTTTTT  
CCGGGCTGAAGCTATGTTCCGCAATTCTCGAGAATGGCGAACATAGCTTCAGCTTTTT  
CCGGCGGTCAGAGATCATAACAGATTCTCGAGAATCTGTATGATCTCTGACCGTTTTT

CCGGCTGTACCTTGTATCTCCCTTTCTCGAGAAAGGGAGATACAAGGTACAGTTTTT  
CCGGCCTCAGCTCATCGCAAGAGTACTCGAGTACTCTTGCATGAGCTGAGGTTTTT  
CCGGAGTGGATGGTACAGCCTCATTCTCGAGAATGAGGCTGTACCATCCACTTTTTT  
CCGGGCCTCTGACCTACCCTCAGTACTCGAGTACTGAGGGTAGGTCAGAGGCTTTTTT  
CCGGCTCGACATCTACAACAACCTACTCGAGTAGGTTGTTGTAGATGTCGAGTTTTT  
CCGGCCTCCCAATTTCTTCTCCTCTCGAGAGGAAGGAAGAAATTGGGAGGTTTTT  
CCGGCGCCAACGTGAACGCGCAAATCTCGAGATTTGCGCGTTCACGTTGGCGTTTTT  
CCGGCGGAGCCTTACTGCCTTTGTACTCGAGTACAAAGGCAGTAAGGCTCCGTTTTT  
CCGGCGCTGACAGCAGCCTCAAGAACTCGAGTTCTTGAGGCTGCTGTCAGCGTTTTT  
CCGGGCAGAGAGTGATGAGGCCAAACTCGAGTTTGGCCTCATCACTCTCTGCTTTTTT  
CCGGCTCTGAAAGCTGGAGAAGAAGTCTCGAGTTCTTCTCCAGCTTTCCAGAGTTTTT  
CCGGGATCACTGCTACTGAGATCTACTCGAGTAGATCTCAGTAGCAGTGATCTTTTT  
CCGGGCTATCCGACTCTGGCCGAAACTCGAGTTTCCGCCAGAGTCGGATAGCTTTTT  
CCGGCCCAGAAATCACTGTGAAATTCTCGAGAATTTACAGTGATTTCTGGGTTTTT  
CCGGCCGTGGGTACAGAAACCAATTCTCGAGAATTGGTTTCTGTACCCACGGTTTTT  
CCGGCGTGGTGAACCTCTGCCTTATACTCGAGTATAAGGCAGAGTTCACCACGTTTTT  
CCGGGCTGCCGTCCATCACAACTGACTCGAGTCAGTTGTGATGGACGGCAGCTTTTTT  
CCGGGAGTTCACAGAAGCGGTGGAACCTCGAGTTCCACCGCTTCTGTGAACTCTTTTT  
CCGGGATGTGGTCTATAATGCGTTTCTCGAGAAACGCATTATAGACCACATCTTTTTG  
CCGGGCCACCAGCTCTGAGCAGATCTCGAGATCTGCTCAGAGCTGGTGGGCTTTTTG  
CCGGGCCGGAAGTATCAGAACCTCTCGAGATGGTTCTGATCAGTTCCGGCTTTTTG  
CCGGGCCTCAGGATGCGTCCACCAACTCGAGTTGGTGGACGCATCCTGAGGCTTTTTG  
CCGGCCAGGGTTTCATTCTGTCTTTCTCGAGAAAGACAGAATGAAACCCTGGTTTTTG  
CCGGCCGGCATATAAGCTGAGCATACTCGAGTATGCTCAGCTTATATGCCGGTTTTTG  
CCGGGCCGTATTTATCATTGAGAATCTCGAGATTCTCAATGATAAATACGGCTTTTTG  
CCGGGCCTGTTTATTACCAGAAATCTCGAGATTTCTGGGTAATAAACAGGCTTTTTG  
CCGGGCCCATTTACACATTGATAATCTCGAGATTATCAATGTGTAAATGGGCTTTTTG  
CCGGCCATTCCGAAGACTACAGCAACTCGAGTTGCTGTAGTCTTCGGAATGGTTTTTG  
CCGGCCTGGCCGACAAGAGCAGTTTCTCGAGAAACTGCTCTTGTCCGCCAGGTTTTTG  
CCGGCTTCTACAACCTGGACAGACAACCTCGAGTTGTCTGTCCAGTTGTAGAAGTTTTTG  
CCGGGTTTCATCTCTGTCTGCAAACCTCGAGTTTGCAGGACAGAGATGAAACTTTTTG  
CCGGGCTGGCACTGTTCCAGATAACTCGAGTTATCTGGGAACAGTGCCAGCTTTTTG  
CCGGCAGTCCACAGAGTCCCTGGTTCTCGAGAACCAGGGACTCTGTGGACTGTTTTTG  
CCGGCAAGAACATCACCCAGATCGTCTCGAGACGATCTGGGTGATGTTCTGTTTTTG  
CCGGGTGGAGAAGATCCTGCACTGTCTCGAGACAGTGCAGGATCTTCTCCACTTTTTG  
CCGGTGAGGGCCAAGTCCATCCAGAAGTCTCGAGTTCTGGATGGACTTGGCCTCATTTTTG  
CCGGGCTAAGAAAGTGTCCGGCAAACCTCGAGTTTGCCTGACACTTTCTTAGCTTTTTG  
CCGGCGCTGCATTGGTCTATCCTTTCTCGAGAAAGGATAGACCAATGCAGCGTTTTTG  
CCGGCCAAAGAATTAACCTCATCTACTCGAGTAGATGGAGTTAATTCTTTGGTTTTTG  
CCGGGCCTGTAAATTGGATTATGATCTCGAGATCATAATCCAATTTACAGGCTTTTTG  
CCGGGCTGCTATTGAAGCCCTAAATCTCGAGATTTAGGGCTTCAATAGCAGCTTTTTG  
CCGGCGAGAGATCAAAGAAAGAATACTCGAGTATTCTTTCTTTGATCTCTCGTTTTTG  
CCGGCCCAAAGGTTATGAATCTCATCTCGAGATGAGATTCATAACCTTTGGGTTTTTG  
CCGGGCCAGTGTCTTCGTCAAATTAACCTCGAGTAAATTTGACGAAGCACTGGCTTTTTG  
CCGGCGTGTCCAGAAGGTCTTCAATCTCGAGATTGAAGACCTTCTGGACACGTTTTTG  
CCGGGCACGAGAAAGTGAATGGCTTCTCGAGAAGCCATTCACTTTCTCGTGCTTTTTG  
CCGGCACCCAACATTGACTGCACATCTCGAGATGTGCAGTCAATGTTGGGTGTTTTTG  
CCGGCAATGACTTCACCTTCGACTACTCGAGTAGTCAAGGTGAAGTCATTGTTTTTG  
CCGGCACCGGCTTCTTAGCTGAATACTCGAGTATTCAGCTAAGAAGCCGGTGTTTTTG  
CCGGGCGGGTGAATCTGGCATATTCTCGAGAATATGCCAGATTTACCCGCTTTTTG  
CCGGCGCAGTCTCTAAATATGATACTCGAGTATCATATTTAAGAGACTGCGTTTTTG  
CCGGCCTTTCCAACATGGTGTCCATCTCGAGATGGACACCATGTTGGAAAGTTTTTG  
CCGGCCTTGACTTTAATCCAATAACTCGAGTTATTGGGATTAAGTCAAGGTTTTTG

CCGGCCAGATCTACTGCATAGAGAACTCGAGTTCTCTATGCAGTAGATCTGGTTTTTG

CCGGCCTCACTAATATCAGGGCTTACTCGAGTAAGCCCTGATATTAGTGAGGTTTTTG  
CCGGCCCAGTATGAAGCCCAACATACTCGAGTATGTTGGGCTTCATACTGGGTTTTTG  
CCGGGCTGATGTTTCAGGCAGTCTTACTCGAGTAAGACTGCCTGAACATCAGCTTTTTG  
CCGGGCTTCCCTTCTTTATTCTCTTCTCGAGAAGAGAATAAAGAAGGGAAGCTTTTTG  
CCGGGCAGATGCAATAATGCAGAACTCGAGTTTCTGCATTATTGCATCTGCTTTTTG  
CCGGCGGATGTTTCATATTCGGGTTTCTCGAGAAACCCGAATATGAACATCCGTTTTTG  
CCGGCCTCGAAACTATTCCATGATTCTCGAGAATCATGGAATAGTTTCGAGGTTTTTG  
CCGGGCTCATAAGAACCCACACAATCTCGAGATTGTGTGGGTTCTTATGAGCTTTTTG  
CCGGCACATTATTCTGGTACTGAATCTCGAGATTCAGTACCAGAATAATGTGTTTTG  
CCGGCTGGCGCTATTCATCTGCTTTCTCGAGAAAGCAGATGAATAGCGCCAGTTTTTG  
CCGGCCGTGACATCTTTGACTGCCTCTCGAGAGGCAGTCAAAGATGTCACGGTTTTTG  
CCGGGAGGAGGATTAGGTCCTGATCTCGAGATCAGGACCTGAATCCTCCTTTTTTG  
CCGGAGGGTCATCTTCACCAAACCACTCGAGTGGTTTGGTGAAGATGACCCTTTTTTG  
CCGGCATGAGTGACAACGGAGGCTTCTCGAGAAGCCTCCGTTGTCACCTCATGTTTTTG  
CCGGGCTGTGAGTCATAGAGGAGATCTCGAGATCTCCTCTATGACTGACAGCTTTTTG  
CCGGCGCTCCTTTCAGACCGCTGTTCTCGAGAACAGCGGTCTGAAAGGAGCGTTTTTG  
CCGGCTAGTCAGAGAGTGCCTGGCACTCGAGTGCCAGGCACTCTCTGACTAGTTTTG  
CCGGGCGCCTGAAGAGAGGTATCATCTCGAGATGATACCTCTTTCAGGCGCTTTTTG  
CCGGGCAGCATGTTGATGAACGGAACCTCGAGTTCCGTTTCATCAACATGCTGCTTTTTG  
CCGGGCTTATCACTGTACAGCTATCTCGAGATAGCTGTGACAGTGATAAGCTTTTTG  
CCGGGAGTATGATGTACCTGTCTTTCTCGAGAAAGACAGGTACATCATACTCTTTTTG  
CCGGGCAAGAGGCATGTCTATCCTACTCGAGTAGGATAGACATGCCTCTTGCTTTTTG  
CCGGCATTGATGAGTCCAACACCATCTCGAGATGGTGTGGACTCATCAATGTTTTG  
CCGGCCACAGTATTGGTTGGGTGTTCTCGAGAACACCCAACCAATACTGTGGTTTTG  
CCGGCGCGGCTCTATGTTCTATGATCTCGAGATCATAGAACATAGAGCCGCGTTTTG  
CCGGCGAGTGATAAGAATCTGATTCTCGAGAATCAGATTCTTATGCACTCGTTTTG  
CCGGGATTTCCCTGTGATCCTCTATCTCGAGATAGAGGATCACAGGGAATCTTTTTG  
CCGGGATCTGGCTCACGAGTTCTATCTCGAGATAGAACTCGTGAGCCAGATCTTTTTG  
CCGGGCTGACAAAGAAGAGAACCAACTCGAGTTGGTTCTCTTCTTTGTCAGCTTTTTG  
CCGGGCGAGGCCCAAGAAATAAGAACTCGAGTTCTTATTTCTTGGGCCTCGTTTTG  
CCGGCAAACGCAAGTACAAGGTGAACTCGAGTTCACCTTGTACTTGCGTTTGTTTTTG  
CCGGAGCTTCTACAATCCATCCTTCTCGAGAAGGATGGATTGTAGGAAGCTTTTTG  
CCGGGACCAAGAAGAAAGGAGTGAACCTCGAGTTCACCTTTCTTCTTGGTCTTTTTG  
CCGGCCCAGGCCATGCTCAATAAATCTCGAGATTTATTGAGCATGGCCTGGGTTTTG  
CCGGGATGGTAATGATCGACCGAATCTCGAGATTCGGTTCGATCATTACCATCTTTTTG  
CCGGCGGAATCATCCTCCAGAACAACCTCGAGTTGTTCTGGAGGATGATTCCGTTTTG  
CCGGGACCTAGACTTCTGGAAGATCTCGAGATCTTCCAGGAAGTCTAGGTCTTTTTG  
CCGGCCTGGCGTCTAGCCCGGAGAACCTCGAGTTCTCCGGGCTAGACGCCAGGTTTTG  
CCGGGCAGACAGAATTTGTCAGAATCTCGAGATTCTGACAAATTCTGTCTGCTTTTTG  
CCGGCCTTTCATCATGTTTCTGTTTCTCGAGAAACAGAAACATGATGAAAGGTTTTG  
CCGGCCCAAATTCATGTTGGCACTTCTCGAGAAGTGCCACATAGAATTTGGGTTTTG  
CCGGGCTCGAATCAAAGCAGCCTATCTCGAGATAGGCTGCTTTGATTTCGAGCTTTTTG  
CCGGCCTCAGGCTTTGAGGAGAATACTCGAGTATTCTCCTCAAAGCCTGAGGTTTTG  
CCGGGCCCTGCTTAAACAAGAGCAATCTCGAGATTGCTCTTGTTAAGCAGGGCTTTTTG  
CCGGCCTGTGTTTGATAAGCCCTTCTCGAGAAAGGGCTTATCAAACACAGGTTTTG  
CCGGCCAGCAAGTTTCTCACACTTACTCGAGTAAGTGTGAGAACTTGCTGGTTTTG  
CCGGCGCCTCCACATTGAATGGATTCTCGAGAATCCATTCAATGTGGAGGCGTTTTG  
CCGGGCTGTGTTTGAGACTATCTTACTCGAGTAAGATAGTCTCAAACACAGCTTTTTG  
CCGGCCTCAAGTTCTTGGACCAGTTCTCGAGAACTGGTCCAAGAACTTGAGGTTTTG  
CCGGCCAGATCAGACTTCGGGTCCTCTCGAGAGGACCCGAAGTCTGATCTGGTTTTG  
CCGGCGGTTTATCCTCTTGGTGTCTCTCGAGAGACACCAAGAGGATAAACCGTTTTG

CCGGCCCTCTCAGGAGAGTGTGCAACTCGAGTTGCACACTCTCCTGAGAGGGTTTTTG  
CCGGGCTCAGCATTACCCTCATCATCTCGAGATGATGAGGGTAATGCTGAGCTTTTTG  
CCGGCGTCAACTTCACAGTTCAGAACTCGAGTTCTGAACTGTGAAGTTGACGTTTTTG  
CCGGCATCATGTCTCGAAGCAGCATCTCGAGATGCTGCTTCGAGACATGATGTTTTTG  
CCGGCCTGAATCTGTCCAAGACCCTCTCGAGAGGGTCTTGACAGATTCAGGTTTTTG  
CCGGCGTCATTATCATGGTGGCCGTCTCGAGACGGCCACCATGATAATGACGTTTTTG  
CCGGGCTCCAATATCCAAGAGATTTCTCGAGAAATCTCTTGGATATTGGAGCTTTTTG  
CCGGCACCAATGAACTTCGCTTTACTCGAGTAAAGCGAAGTTTCATTGGTGTTTTG  
CCGGGAAAGCAAGATTAGAGAGTTTCTCGAGAACTCTCTAATCTTGCTTTCTTTTTG  
CCGGCAGCAAAGATAAACCTGGCAACTCGAGTTGCCAGGTTTATCTTTGCTGTTTTG  
CCGGCCGAGTTAAAGAGCTGAAGAACTCGAGTTCTTCAGCTCTTAACTCGGTTTTTG  
CCGGGAATCGTTGTGCTACTATATCTCGAGATATAGTAGCACAACCGATTCTTTTTG  
CCGGGTATTTCTTATCTGGGAAGATCTCGAGATCTTCCAGATAAGAAATACTTTTTG  
CCGGGCTTAAGTATGACAAGCAGATCTCGAGATCTGCTTGTCACTTAAGCTTTTTG  
CCGGAGATAAATGAACTGATGCCTACTCGAGTAGGCATCAGTTCATTTATCTTTTTG  
CCGGCCAGTTTATGAGATGGTAATTCTCGAGAATTACCATCTCATAAACTGGTTTTG  
CCGGCCAGAAGATTACTACACCGATCTCGAGATCGGTGTAGTAATCTTCTGTTTTTG  
CCGGGCTGCTTTCTCCCTCACTTTCTCGAGAAAGTGAGGGAAGAAAGCAGCTTTTTG  
CCGGGCTTTGTTGAACAACCTCCTTCTCGAGAAGGAGGTTGTTCAACAAAGCTTTTTG  
CCGGCCACCAATAAATTCTACTACTCGAGTAGTAGAATTTATTTGGGTGGTTTTG  
CCGGCCCGTCCAACACAGATTATTCTCGAGAATAATCTGTGTTTGGACGGGTTTTG  
CCGGCGTCTTTGACTTATGATCTAACTCGAGTTAGATCATAAGTCAAAGACGTTTTG  
CCGGGCATCGACAGTAGGATCTGAACTCGAGTTCAGATCCTACTGTGATGCTTTTTG  
CCGGCCAGGCAAATATTTACATCTTCTCGAGAAGATGTAAATATTTGCCTGGTTTTG  
CCGGCCCTATTAGATACACTTCTTACTCGAGTAAGAAGTGTATCTAATAGGGTTTTG  
CCGGGCCTAGTCAAGCCTGAGAATTCTCGAGAATTCTCAGGCTTGACTAGGCTTTTTG  
CCGGGATCTGGAAGACCACCAAACTCGAGATTTGGGTGGTCTTCCAGATCTTTTTG  
CCGGCCATCTCTCAATGTTGACGGACTCGAGTCCGTCAACATTGAGAGATGGTTTTG

CCGGCCCATTAATTCAGTGTAGTTCTCGAGAACTACACTGAATTTAATGGGTTTTG  
CCGGGCAGCGTTACAGACAAACAACTCGAGTTTGTGTTGTCTGTAACGCTGCTTTTTG  
CCGGGCCCAATACCAATGGAAGTATCTCGAGATACTTCCATTGGTATTGGGCTTTTTG  
CCGGCCACAATTCAGCAGTTGTTACTCGAGTAACTGCTGAATTGTGGGTTTTG  
CCGGGCGCTGTAACCTTTAGCATTCTCGAGAATGCTAAAGAGTTACAGCGTTTTG  
CCGGGCAGAAATTATTGGGCTCTTCTCGAGAAAGAGCCCAATAATTTCTGCTTTTTG  
CCGGCCAGTGAACAACGATGGCATTCTCGAGAATGCCATCGTTGTTCACTGGTTTTG  
CCGGCCAAGCAGAATTGCTCACATTCTCGAGAATGTGAGCAATTCTGCTTGGTTTTG  
CCGGCGATTCAAAGTGGGCACAGATCTCGAGATCTGTGCCCACTTTGAATCGTTTTG  
CCGGCCAACCAAGAATCTATCATTCTCGAGAATGATAGATTCTTGGGTTGGTTTTG  
CCGGCCAGTAATGGAATGAAGGTAACCTCGAGTTACCTTCATTCCATTAAGTTTTG  
CCGGCCTGGCAATCTCTCTCAGTTTCTCGAGAACTGAGAGAGATTGCCAGTTTTG  
CCGGGCCTTGCTGAATAAGTGTAACCTCGAGTTTACACTTATTCAGCAAGGCTTTTTG  
CCGGGCATGTAATAGAGTGTGCTAACTCGAGTTAGCACACTCTATTACATGCTTTTTG  
CCGGGCCAGTATATGAAATTGGATACTCGAGTATCCAATTTATATACTGGCTTTTTG  
CCGGATTCTGCACGAGAAGGTACACCTCGAGGTGTACCTTCTCGTGCAGAATTTTTG  
CCGGGCCTCTGATCTCGATTTCTTCTCGAGAAGAAATCGGAGATCAGAGGCTTTTTG  
CCGGCGTGGGACCTTCCAGTACTACTCGAGTAGTACTGGGAAGGTCCCACGTTTTG  
CCGGGATCTCCGATTTCTTCCCAACTCGAGTTGGCGAAGAAATCGGAGATCTTTTTG  
CCGGCCGCTGGGATTACGACTTCCACTCGAGTGGAAAGTCGTAATCCCAGCGTTTTG  
CCGGCCATGTTGTAATGCTGCACTTCTCGAGAAGTGCAGCATTACAACATGGTTTTG  
CCGGGCCAACCTTAACCTTTCTAATCTCGAGATTAGAAAGGTTAAGGTTGGCTTTTTG  
CCGGCCTCACAAACCAACACTTTCTCGAGAAAGTGTGGTGTGTTGAGGTTTTG  
CCGGCCTGACACTTACAACAGTCAACTCGAGTTGACTGTTGTAAGTGTGAGTTTTG

CCGGGCTGGCAGTTTCAAACGTAATCTCGAGATTACGTTTGAAACTGCCAGCTTTTTG  
CCGGCGCACATTCATGTGGGCATTTCTCGAGAAATGCCACATGAATGTGCGTTTTTG  
CCGGGCGACTCTGGAGGACGAAGTTCTCGAGAACTTCGTCCTCCAGAGTCGCTTTTTG  
CCGGTGGGAAACCAAGGAAGAGGAACTCGAGTTCCTCTTCTTGGTTTTCCATTTTTG  
CCGGGAATCAGGTAGCGCTTCGATTCTCGAGAATCGAAGCGCTACCTGATTCTTTTTG  
CCGGGCAGCATACCAATTACCCATACTCGAGTATGGGTAATTGGTATGCTGCTTTTTG  
CCGGGCGAGGTTATATTATCGGTTACTCGAGTAACCGATAATATAACCTCGCTTTTTG  
CCGGCCCAGTTGATTATTATCCTTTCTCGAGAAAGGATAATAATCAACTGGGTTTTG  
CCGGCCATCCAATGTAGTAGCCATTCTCGAGAATGGCTACTACATTGGATGGTTTTG  
CCGGGCGTCTCTACTGATGATATAACTCGAGTTATATCATCAGTAGAGACGCTTTTTG  
CCGGCCCTAAGTTTACTTCTCTAAACTCGAGTTTAGAGAAGTAACTTAGGGTTTTG  
CCGGGCCACCTAATTGTACTGAATCTCGAGATTCAGTACAATTAGGTGGGCTTTTTG  
CCGGCCCACCTAATTGTACTGAATTCTCGAGAATTCAGTACAATTAGGTGGGTTTTG  
CCGGCCCTTCTAAATGCCCATCATTCTCGAGAATGATGGGCATTTAGAAGGTTTTG  
CCGGGCCTACAAGAAAGTACGAGATCTCGAGATCTCGTACTTTCTTGTAGGCTTTTTG  
CCGGCGGGCTTTGTTTCTTCTTACTCGAGTAAAGAAGGAAACAAAGCCGTTTTG  
CCGGGCTCTGGATAATTCTGCACAATCTCGAGATTGTGCAGAATATCCAGAGCTTTTTG  
CCGGGCTTCGTGTTAATAAGCTGATCTCGAGATCAGCTTATTAACACGAAGCTTTTTG  
CCGGCCCGTGGAAATGAAATCCGAACTCGAGTTTCGGATTTCAATCCACGGGTTTTG  
CCGGCGACTTCAAAGATACTGACATCTCGAGATGTCAGTATCTTGAAGTCGTTTTG  
CCGGCCTGACTTGTGCTAGTCATACTCGAGTATGACTAGCAACAAGTCAGGTTTTG  
CCGGGCAAGATACATGGCTCCAGAACTCGAGTTCTGGAGCCATGTATCTTGCTTTTTG  
CCGGCGTTCAGAAGTCGGTTAATAACTCGAGTTATTAACCGACTTCTGAACGTTTTG  
CCGGGCAGAACACTTCAGAGCAGTTCTCGAGAACTGCTCTGAAGTGTCTGCTTTTTG  
CCGGGCCTGGTGAGACTTTCTTCATCTCGAGATGAAGAAAGTCTCACCAGGCTTTTTG  
CCGGGCAGACAGAACTGGATTAACTCGAGTTTAAATCCAGTTTCTGTCTGCTTTTTG  
CCGGCCTGAGTATTGGTGTTCATTCTCGAGAATGGAACACCAATACTCAGGTTTTG  
CCGGGCTGCTGGAATTGGTGTGATCTCGAGATCAACACCAATTCCAGCAGCTTTTTG  
CCGGCGAGTTGTATCACCTGGAATTCTCGAGAATTCCAGGTGATACAACTCGTTTTG  
CCGGGTACTTCATACCATGCCGATTCTCGAGAATCGGCATGGTATGAAGTACTTTTTG  
CCGGGCCAGGATGATAAGTTCCTTTCTCGAGAAAGGAACTTATCATCCTGGCTTTTTG  
CCGGGCACGATTTCAATGAACACTTCTCGAGAAGTGTTCAATGAAATCGTGCTTTTTG  
CCGGCTTAAGATGAAGGAGACCATCTCGAGATGGTCTCCTTCATCTTAGAGTTTTG  
CCGGGCCCTCGGTGTCCTACTTCAACTCGAGTTGAAGTAGGACACCGAGGGCTTTTTG  
CCGGGAACAAACAGATCATCCGCAACTCGAGTTGCGGATGATCTGTTTGTCTTTTTG  
CCGGCCCTGATTTCTGCATGGTGTACTCGAGTACACCATGCAGAAATCAGGGTTTTG  
CCGGCCTGTGCTCATTGATCGGAATCTCGAGATTCGGATCAATGAGCACAGGTTTTG  
CCGGCCTCTTGATATGGCCCTTGTCTCGAGAACAAGGGCCATATCAAGAGTTTTG  
CCGGGCCTGAAACAAGGCTGAGAATCTCGAGATTCTCAGCCTTGTTCAGGCTTTTTG  
CCGGGCGAAGTTTCAGAGACTCTTACTCGAGTAAGAGTCTCTGAAACTTCGTTTTG  
CCGGGTGTTCTTCTTCTCTGTATTCTCGAGAATACAGAGAAAGAAGAACAACCTTTTTG  
CCGGGCCTGATCTATACAAAGTCTTCTCGAGAAGACTTTGTATAGATCAGGCTTTTTG  
CCGGGCAGACTATTTCTTTGAACTCGAGTTCCAAAGAGAAATAGTCTGCTTTTTG  
CCGGCCAAGTGAAGAATATGGGAACTCGAGTTTCCATATTCTTCACTTGGTTTTG  
CCGGCCTCAGTAAAGAATGCGCTATCTCGAGATAGCGCATTCTTACTGAGGTTTTG  
CCGGGCAGCTAACAATGTCTGGTACTCGAGTAACAGACATTGTTAGCTGCTTTTTG  
CCGGGCAGTGACAATTTATAACCAACTCGAGTTTGGTATAAATTGTCAGTCTTTTTG  
CCGGCCAGGCTGCAATAAGAGATATCTCGAGATATCTTATTGCAGCCTGGTTTTG  
CCGGGCATCAGAGAAACATGACCAACTCGAGTTGGTCATGTTTCTCTGATGCTTTTTG  
CCGGGCATCTGAGACCAGTGAGAACTCGAGTTTCTCACTGGTCTCAGATGCTTTTTG  
CCGGCCGCATTTAATTCATGGTATTCTCGAGAATACCATGAATTAATGCGGTTTTG  
CCGGCCGGGAGATAGTGATGAAGTACTCGAGTACTTCATCACTATCTCCCGTTTTG  
CCGGCTCTGAAGACTCTGCTCAGTTCTCGAGAACTGAGCAGAGTCTTCAGAGTTTTG

CCGGGTGATGAAGTACATCCATTATCTCGAGATAATGGATGTACTTCATCACTTTTTG  
CCGGCGCCCTGTGGATGACTGAGTACTCGAGTACTCAGTCATCCACAGGGCGTTTTTG

CCGGGCTGTGAAATTCACAGTAATACTCGAGTATTACTGTGAATTTACAGCTTTTTG  
CCGGCCCAGAAATATGGGTGGCATACTCGAGTATGCCACCCATATTTCTGGGTTTTTG  
CCGGCCCTGCAAATAGCAGAAATAACTCGAGTATTTCTGCTATTTGCAGGGTTTTTG  
CCGGGCCAACAAAGTCATCACGTAACCTCGAGTTACGTGATGACTTTGTTGGCTTTTTG  
CCGGCCCAGTTTGTTTTCTCAAGAACTCGAGTTTCTTGAGAAACAACTGGGTTTTTG  
CCGGCCGAGTACAGTCTGTATCAAACCTCGAGTTTGATACAGACTGTAAGTACTCGGTTTTG  
CCGGGCTGTACCTGAAAGGATCATACTCGAGTATGATCCTTTCAGGTACAGCTTTTTG  
CCGGGTGCAGATGAAGAAGCAGAACTCGAGTTTCTGCTTCTTCATCTGCACTTTTTG  
CCGGGCTGCGATTCTACGACGGCATCTCGAGATGCCGTCGTAGAATCGCAGCTTTTTG  
CCGGGAGTTCTTTGAAGTAGCCAATCTCGAGATTGGCTACTTCAAAGAACTCTTTTTG  
CCGGTACAATGTACACATGTAACACCTCGAGGTGTTACATGTGTACATTGTATTTTTG  
CCGGTAGTACTTATGTTGCACAATGCTCGAGCATTGTGCAACATAAGTACTATTTTTG  
CCGGCTGATCTTCTCCAAGAGGAACTCGAGTTTCTTCTTGAGAAAGATCAGCTTTTTG  
CCGGAGAGGTTTCTAAGAGTGCTGGCTCGAGCCAGCACTCTTAGGAACCTCTTTTTTG  
CCGGTATTGCACGAGTTGACCTAGACTCGAGTCTAGGTCAACTCGTGCAATATTTTTG  
CCGGCAGAGATCGTGTATTGAGATTCTCGAGAATCTCAATACACGATCTCTGTTTTTG  
CCGGGGTCAAACCTTCATGCGGTGGTCTCGAGACCACCGCATGAAGTTTGACCTTTTT  
CCGGCCAGGTCGGAGGCAATACATTCTCGAGAATGTATTGCCTCCGACCTGGTTTTT  
CCGGCAACAGCAACACACCAGGAATCTCGAGATTCTGGTGTGTTGCTGTTGTTTTT  
CCGGATCATCGTGGTTGCCCTGTATCTCGAGATACAGGGCAACCACGATGATTTTTT  
CCGGCAGGGAGATACCGTGAAACATCTCGAGATGTTTCACGGTATCTCCCTGTTTTT

MISSION® Non-Target shRNA Control Vector

| Clone Name           | RefSeq    | Gene Symbol | Gene Description                      |
|----------------------|-----------|-------------|---------------------------------------|
| NM_003579.x-1274s1c1 | NM_003579 | RAD54L      | RAD54-like (S. cerevisiae)            |
| NM_003579.x-2027s1c1 | NM_003579 | RAD54L      | RAD54-like (S. cerevisiae)            |
| NM_003579.x-2161s1c1 | NM_003579 | RAD54L      | RAD54-like (S. cerevisiae)            |
| NM_003579.x-1877s1c1 | NM_003579 | RAD54L      | RAD54-like (S. cerevisiae)            |
| NM_003579.x-2302s1c1 | NM_003579 | RAD54L      | RAD54-like (S. cerevisiae)            |
| NM_000075.x-1320s1c1 | NM_000075 | CDK4        | cyclin-dependent kinase 4             |
| NM_000075.x-608s1c1  | NM_000075 | CDK4        | cyclin-dependent kinase 4             |
| NM_000075.x-258s1c1  | NM_000075 | CDK4        | cyclin-dependent kinase 4             |
| NM_000075.x-528s1c1  | NM_000075 | CDK4        | cyclin-dependent kinase 4             |
| NM_004327.x-3011s1c1 | NM_004327 | BCR         | breakpoint cluster region             |
| NM_004327.x-3132s1c1 | NM_004327 | BCR         | breakpoint cluster region             |
| NM_004327.x-3365s1c1 | NM_004327 | BCR         | breakpoint cluster region             |
| NM_004327.x-2355s1c1 | NM_004327 | BCR         | breakpoint cluster region             |
| NM_014572.x-3750s1c1 | NM_014572 | LATS2       | LATS, large tumor suppressor, hom     |
| NM_014572.x-2457s1c1 | NM_014572 | LATS2       | LATS, large tumor suppressor, hom     |
| NM_014572.x-2894s1c1 | NM_014572 | LATS2       | LATS, large tumor suppressor, hom     |
| NM_014572.x-490s1c1  | NM_014572 | LATS2       | LATS, large tumor suppressor, hom     |
| NM_014572.x-2162s1c1 | NM_014572 | LATS2       | LATS, large tumor suppressor, hom     |
| NM_024424.x-2140s1c1 | NM_024424 | WT1         | Wilms tumor 1                         |
| NM_024424.x-904s1c1  | NM_024424 | WT1         | Wilms tumor 1                         |
| NM_024424.x-588s1c1  | NM_024424 | WT1         | Wilms tumor 1                         |
| NM_024424.x-1440s1c1 | NM_024424 | WT1         | Wilms tumor 1                         |
| NM_004690.x-2666s1c1 | NM_004690 | LATS1       | LATS, large tumor suppressor, hom     |
| NM_004690.x-3151s1c1 | NM_004690 | LATS1       | LATS, large tumor suppressor, hom     |
| NM_004690.x-3614s1c1 | NM_004690 | LATS1       | LATS, large tumor suppressor, hom     |
| NM_004690.x-738s1c1  | NM_004690 | LATS1       | LATS, large tumor suppressor, hom     |
| NM_004690.x-4412s1c1 | NM_004690 | LATS1       | LATS, large tumor suppressor, hom     |
| NM_005246.x-1193s1c1 | NM_005246 | FER         | fer (fps/fes related) tyrosine kinase |
| NM_005246.x-883s1c1  | NM_005246 | FER         | fer (fps/fes related) tyrosine kinase |
| NM_005246.x-1570s1c1 | NM_005246 | FER         | fer (fps/fes related) tyrosine kinase |
| NM_005246.x-2693s1c1 | NM_005246 | FER         | fer (fps/fes related) tyrosine kinase |
| NM_005246.x-934s1c1  | NM_005246 | FER         | fer (fps/fes related) tyrosine kinase |
| NM_000314.x-1548s1c1 | NM_000314 | PTEN        | phosphatase and tensin homolog        |
| NM_000314.x-1320s1c1 | NM_000314 | PTEN        | phosphatase and tensin homolog        |
| NM_000314.x-1326s1c1 | NM_000314 | PTEN        | phosphatase and tensin homolog        |
| NM_000314.x-1956s1c1 | NM_000314 | PTEN        | phosphatase and tensin homolog        |
| NM_000314.x-3001s1c1 | NM_000314 | PTEN        | phosphatase and tensin homolog        |
| NM_000546.x-1095s1c1 | NM_000546 | TP53        | tumor protein p53 (Li-Fraumeni sy     |
| NM_000546.x-309s1c1  | NM_000546 | TP53        | tumor protein p53 (Li-Fraumeni sy     |
| NM_000546.x-427s1c1  | NM_000546 | TP53        | tumor protein p53 (Li-Fraumeni sy     |
| NM_000546.x-941s1c1  | NM_000546 | TP53        | tumor protein p53 (Li-Fraumeni sy     |
| NM_002017.2-1917s1c1 | NM_002017 | FLI1        | Friend leukemia virus integration 1   |
| NM_002017.2-467s1c1  | NM_002017 | FLI1        | Friend leukemia virus integration 1   |
| NM_002017.2-911s1c1  | NM_002017 | FLI1        | Friend leukemia virus integration 1   |
| NM_002017.2-1315s1c1 | NM_002017 | FLI1        | Friend leukemia virus integration 1   |
| NM_002017.2-730s1c1  | NM_002017 | FLI1        | Friend leukemia virus integration 1   |
| NM_003722.3-2716s1c1 | NM_003722 | TP73L       | tumor protein p73-like                |
| NM_003722.3-870s1c1  | NM_003722 | TP73L       | tumor protein p73-like                |
| NM_003722.3-2058s1c1 | NM_003722 | TP73L       | tumor protein p73-like                |
| NM_003722.3-1218s1c1 | NM_003722 | TP73L       | tumor protein p73-like                |
| NM_005427.1-2076s1c1 | NM_005427 | TP73        | tumor protein p73                     |
| NM_005427.1-545s1c1  | NM_005427 | TP73        | tumor protein p73                     |

|                       |           |       |                                     |
|-----------------------|-----------|-------|-------------------------------------|
| NM_005427.1-1613s1c1  | NM_005427 | TP73  | tumor protein p73                   |
| NM_005427.1-1643s1c1  | NM_005427 | TP73  | tumor protein p73                   |
| NM_001447.1-13824s1c1 | NM_001447 | FAT2  | FAT tumor suppressor homolog 2      |
| NM_001447.1-7008s1c1  | NM_001447 | FAT2  | FAT tumor suppressor homolog 2      |
| NM_001447.1-11209s1c1 | NM_001447 | FAT2  | FAT tumor suppressor homolog 2      |
| NM_001447.1-4842s1c1  | NM_001447 | FAT2  | FAT tumor suppressor homolog 2      |
| NM_001447.1-2782s1c1  | NM_001447 | FAT2  | FAT tumor suppressor homolog 2      |
| NM_024529.3-2409s1c1  | NM_024529 | CDC73 | cell division cycle 73, Paf1/RNA pc |
| NM_024529.3-1276s1c1  | NM_024529 | CDC73 | cell division cycle 73, Paf1/RNA pc |
| NM_024529.3-504s1c1   | NM_024529 | CDC73 | cell division cycle 73, Paf1/RNA pc |
| NM_024529.3-1032s1c1  | NM_024529 | CDC73 | cell division cycle 73, Paf1/RNA pc |
| NM_014682.1-4498s1c1  | NM_014682 | ST18  | suppression of tumorigenicity 18 (t |
| NM_014682.1-2494s1c1  | NM_014682 | ST18  | suppression of tumorigenicity 18 (t |
| NM_014682.1-2644s1c1  | NM_014682 | ST18  | suppression of tumorigenicity 18 (t |
| NM_014682.1-1327s1c1  | NM_014682 | ST18  | suppression of tumorigenicity 18 (t |
| NM_014682.1-3746s1c1  | NM_014682 | ST18  | suppression of tumorigenicity 18 (t |
| NM_006497.1-392s1c1   | NM_006497 | HIC1  | hypermethylated in cancer 1         |
| NM_006497.1-941s1c1   | NM_006497 | HIC1  | hypermethylated in cancer 1         |
| NM_006497.1-1763s1c1  | NM_006497 | HIC1  | hypermethylated in cancer 1         |
| NM_006497.1-1982s1c1  | NM_006497 | HIC1  | hypermethylated in cancer 1         |
| NM_006497.1-116s1c1   | NM_006497 | HIC1  | hypermethylated in cancer 1         |
| NM_003189.1-3799s1c1  | NM_003189 | TAL1  | T-cell acute lymphocytic leukemia   |
| NM_003189.1-1051s1c1  | NM_003189 | TAL1  | T-cell acute lymphocytic leukemia   |
| NM_003189.1-1243s1c1  | NM_003189 | TAL1  | T-cell acute lymphocytic leukemia   |
| NM_003189.1-1060s1c1  | NM_003189 | TAL1  | T-cell acute lymphocytic leukemia   |
| NM_003189.1-673s1c1   | NM_003189 | TAL1  | T-cell acute lymphocytic leukemia   |
|                       |           |       |                                     |
| NM_002229.2-1541s1c1  | NM_002229 | JUNB  | jun B proto-oncogene                |
| NM_002229.2-1054s1c1  | NM_002229 | JUNB  | jun B proto-oncogene                |
| NM_002229.2-364s1c1   | NM_002229 | JUNB  | jun B proto-oncogene                |
| NM_002229.2-1066s1c1  | NM_002229 | JUNB  | jun B proto-oncogene                |
| NM_002229.2-355s1c1   | NM_002229 | JUNB  | jun B proto-oncogene                |
| NM_005354.2-1056s1c1  | NM_005354 | JUND  | jun D proto-oncogene                |
| NM_005354.2-605s1c1   | NM_005354 | JUND  | jun D proto-oncogene                |
| NM_005354.2-321s1c1   | NM_005354 | JUND  | jun D proto-oncogene                |
| NM_021020.1-2175s1c1  | NM_021020 | LZTS1 | leucine zipper, putative tumor sup  |
| NM_021020.1-434s1c1   | NM_021020 | LZTS1 | leucine zipper, putative tumor sup  |
| NM_021020.1-774s1c1   | NM_021020 | LZTS1 | leucine zipper, putative tumor sup  |
| NM_021020.1-309s1c1   | NM_021020 | LZTS1 | leucine zipper, putative tumor sup  |
| NM_005252.2-1551s1c1  | NM_005252 | FOS   | v-fos FBJ murine osteosarcoma vir   |
| NM_005252.2-654s1c1   | NM_005252 | FOS   | v-fos FBJ murine osteosarcoma vir   |
| NM_005252.2-1157s1c1  | NM_005252 | FOS   | v-fos FBJ murine osteosarcoma vir   |
| NM_005252.2-540s1c1   | NM_005252 | FOS   | v-fos FBJ murine osteosarcoma vir   |
| NM_005252.2-684s1c1   | NM_005252 | FOS   | v-fos FBJ murine osteosarcoma vir   |
| NM_005253.3-1943s1c1  | NM_005253 | FOSL2 | FOS-like antigen 2                  |
| NM_005253.3-906s1c1   | NM_005253 | FOSL2 | FOS-like antigen 2                  |
| NM_005253.3-1535s1c1  | NM_005253 | FOSL2 | FOS-like antigen 2                  |
| NM_005253.3-1016s1c1  | NM_005253 | FOSL2 | FOS-like antigen 2                  |
| NM_005253.3-1368s1c1  | NM_005253 | FOSL2 | FOS-like antigen 2                  |
| NM_002875.2-1853s1c1  | NM_002875 | RAD51 | RAD51 homolog (RecA homolog, l      |
| NM_002875.2-932s1c1   | NM_002875 | RAD51 | RAD51 homolog (RecA homolog, l      |
| NM_002875.2-1224s1c1  | NM_002875 | RAD51 | RAD51 homolog (RecA homolog, l      |
| NM_002875.2-543s1c1   | NM_002875 | RAD51 | RAD51 homolog (RecA homolog, l      |



|                       |           |       |                                                  |
|-----------------------|-----------|-------|--------------------------------------------------|
| NM_005438.2-780s1c1   | NM_005438 | FOSL1 | FOS-like antigen 1                               |
| NM_005438.2-921s1c1   | NM_005438 | FOSL1 | FOS-like antigen 1                               |
| NM_005438.2-339s1c1   | NM_005438 | FOSL1 | FOS-like antigen 1                               |
| NM_005438.2-385s1c1   | NM_005438 | FOSL1 | FOS-like antigen 1                               |
| NM_005178.2-510s1c1   | NM_005178 | BCL3  | B-cell CLL/lymphoma 3                            |
| NM_005178.2-1269s1c1  | NM_005178 | BCL3  | B-cell CLL/lymphoma 3                            |
| NM_005178.2-914s1c1   | NM_005178 | BCL3  | B-cell CLL/lymphoma 3                            |
| NM_005178.2-272s1c1   | NM_005178 | BCL3  | B-cell CLL/lymphoma 3                            |
| NM_005178.2-1013s1c1  | NM_005178 | BCL3  | B-cell CLL/lymphoma 3                            |
| NM_032429.1-1726s1c1  | NM_032429 | LZTS2 | leucine zipper, putative tumor suppressor        |
| NM_032429.1-459s1c1   | NM_032429 | LZTS2 | leucine zipper, putative tumor suppressor        |
| NM_032429.1-2058s1c1  | NM_032429 | LZTS2 | leucine zipper, putative tumor suppressor        |
| NM_032429.1-717s1c1   | NM_032429 | LZTS2 | leucine zipper, putative tumor suppressor        |
| NM_002634.2-975s1c1   | NM_002634 | PHB   | prohibitin                                       |
| NM_002634.2-248s1c1   | NM_002634 | PHB   | prohibitin                                       |
| NM_002634.2-136s1c1   | NM_002634 | PHB   | prohibitin                                       |
| NM_002634.2-427s1c1   | NM_002634 | PHB   | prohibitin                                       |
| NM_002634.2-605s1c1   | NM_002634 | PHB   | prohibitin                                       |
| NM_004324.3-691s1c1   | NM_004324 | BAX   | BCL2-associated X protein                        |
| NM_004324.3-105s1c1   | NM_004324 | BAX   | BCL2-associated X protein                        |
| NM_004324.3-456s1c1   | NM_004324 | BAX   | BCL2-associated X protein                        |
| NM_004324.3-219s1c1   | NM_004324 | BAX   | BCL2-associated X protein                        |
| NM_005245.1-14429s1c1 | NM_005245 | FAT   | FAT tumor suppressor homolog 1                   |
| NM_005245.1-6937s1c1  | NM_005245 | FAT   | FAT tumor suppressor homolog 1                   |
| NM_005245.1-10048s1c1 | NM_005245 | FAT   | FAT tumor suppressor homolog 1                   |
| NM_005245.1-3609s1c1  | NM_005245 | FAT   | FAT tumor suppressor homolog 1                   |
| NM_005245.1-5385s1c1  | NM_005245 | FAT   | FAT tumor suppressor homolog 1                   |
| NM_002231.2-949s1c1   | NM_002231 | CD82  | CD82 antigen                                     |
| NM_002231.2-283s1c1   | NM_002231 | CD82  | CD82 antigen                                     |
| NM_002231.2-643s1c1   | NM_002231 | CD82  | CD82 antigen                                     |
| NM_002231.2-300s1c1   | NM_002231 | CD82  | CD82 antigen                                     |
| NM_005380.3-217s1c1   | NM_005380 | NBL1  | neuroblastoma, suppression of tumorigenicity 5   |
| NM_005380.3-365s1c1   | NM_005380 | NBL1  | neuroblastoma, suppression of tumorigenicity 5   |
| NM_005380.3-256s1c1   | NM_005380 | NBL1  | neuroblastoma, suppression of tumorigenicity 5   |
| NM_005380.3-479s1c1   | NM_005380 | NBL1  | neuroblastoma, suppression of tumorigenicity 5   |
| NM_005380.3-292s1c1   | NM_005380 | NBL1  | neuroblastoma, suppression of tumorigenicity 5   |
| NM_005418.2-3384s1c1  | NM_005418 | ST5   | suppression of tumorigenicity 5                  |
| NM_005418.2-2580s1c1  | NM_005418 | ST5   | suppression of tumorigenicity 5                  |
| NM_005418.2-1965s1c1  | NM_005418 | ST5   | suppression of tumorigenicity 5                  |
| NM_003932.3-765s1c1   | NM_003932 | ST13  | suppression of tumorigenicity 13 (chromosome 13) |
| NM_003932.3-501s1c1   | NM_003932 | ST13  | suppression of tumorigenicity 13 (chromosome 13) |
| NM_003932.3-876s1c1   | NM_003932 | ST13  | suppression of tumorigenicity 13 (chromosome 13) |
| NM_003932.3-1196s1c1  | NM_003932 | ST13  | suppression of tumorigenicity 13 (chromosome 13) |
| NM_003932.3-606s1c1   | NM_003932 | ST13  | suppression of tumorigenicity 13 (chromosome 13) |
| NM_021978.2-405s1c1   | NM_021978 | ST14  | suppression of tumorigenicity 14 (chromosome 14) |
| NM_021978.2-227s1c1   | NM_021978 | ST14  | suppression of tumorigenicity 14 (chromosome 14) |
| NM_021978.2-1234s1c1  | NM_021978 | ST14  | suppression of tumorigenicity 14 (chromosome 14) |
| NM_021978.2-2261s1c1  | NM_021978 | ST14  | suppression of tumorigenicity 14 (chromosome 14) |
| NM_021978.2-1463s1c1  | NM_021978 | ST14  | suppression of tumorigenicity 14 (chromosome 14) |
| NM_003310.1-341s1c1   | NM_003310 | TSSC1 | tumor suppressing subtransferable                |
| NM_003310.1-252s1c1   | NM_003310 | TSSC1 | tumor suppressing subtransferable                |
| NM_003310.1-1045s1c1  | NM_003310 | TSSC1 | tumor suppressing subtransferable                |
| NM_003310.1-850s1c1   | NM_003310 | TSSC1 | tumor suppressing subtransferable                |

|                      |           |         |                                      |
|----------------------|-----------|---------|--------------------------------------|
| NM_003310.1-805s1c1  | NM_003310 | TSSC1   | tumor suppressing subtransferable    |
| NM_018412.2-407s1c1  | NM_018412 | ST7     | suppression of tumorigenicity 7      |
| NM_018412.2-974s1c1  | NM_018412 | ST7     | suppression of tumorigenicity 7      |
| NM_018412.2-1174s1c1 | NM_018412 | ST7     | suppression of tumorigenicity 7      |
| NM_018412.2-1662s1c1 | NM_018412 | ST7     | suppression of tumorigenicity 7      |
| NM_018412.2-754s1c1  | NM_018412 | ST7     | suppression of tumorigenicity 7      |
| NM_006765.2-767s1c1  | NM_006765 | TUSC3   | tumor suppressor candidate 3         |
| NM_006765.2-451s1c1  | NM_006765 | TUSC3   | tumor suppressor candidate 3         |
| NM_006765.2-979s1c1  | NM_006765 | TUSC3   | tumor suppressor candidate 3         |
| NM_006765.2-1054s1c1 | NM_006765 | TUSC3   | tumor suppressor candidate 3         |
| NM_006765.2-555s1c1  | NM_006765 | TUSC3   | tumor suppressor candidate 3         |
| NM_005706.2-460s1c1  | NM_005706 | TSSC4   | tumor suppressing subtransferable    |
| NM_005706.2-350s1c1  | NM_005706 | TSSC4   | tumor suppressing subtransferable    |
| NM_005706.2-815s1c1  | NM_005706 | TSSC4   | tumor suppressing subtransferable    |
| NM_005706.2-526s1c1  | NM_005706 | TSSC4   | tumor suppressing subtransferable    |
| NM_005851.3-780s1c1  | NM_005851 | CDK2AP2 | CDK2-associated protein 2            |
| NM_005851.3-672s1c1  | NM_005851 | CDK2AP2 | CDK2-associated protein 2            |
| NM_005851.3-883s1c1  | NM_005851 | CDK2AP2 | CDK2-associated protein 2            |
| NM_005851.3-849s1c1  | NM_005851 | CDK2AP2 | CDK2-associated protein 2            |
| NM_006545.3-1064s1c1 | NM_006545 | TUSC4   | tumor suppressor candidate 4         |
| NM_006545.3-308s1c1  | NM_006545 | TUSC4   | tumor suppressor candidate 4         |
| NM_006545.3-660s1c1  | NM_006545 | TUSC4   | tumor suppressor candidate 4         |
| NM_006545.3-929s1c1  | NM_006545 | TUSC4   | tumor suppressor candidate 4         |
| NM_006545.3-593s1c1  | NM_006545 | TUSC4   | tumor suppressor candidate 4         |
| NM_007275.1-633s1c1  | NM_007275 | TUSC2   | tumor suppressor candidate 2         |
| NM_007275.1-289s1c1  | NM_007275 | TUSC2   | tumor suppressor candidate 2         |
| NM_007275.1-388s1c1  | NM_007275 | TUSC2   | tumor suppressor candidate 2         |
| NM_007275.1-451s1c1  | NM_007275 | TUSC2   | tumor suppressor candidate 2         |
| NM_007275.1-319s1c1  | NM_007275 | TUSC2   | tumor suppressor candidate 2         |
| NM_015710.2-343s1c1  | NM_015710 | GLTSCR2 | glioma tumor suppressor candidate    |
| NM_015710.2-166s1c1  | NM_015710 | GLTSCR2 | glioma tumor suppressor candidate    |
| NM_015710.2-1429s1c1 | NM_015710 | GLTSCR2 | glioma tumor suppressor candidate    |
| NM_015710.2-784s1c1  | NM_015710 | GLTSCR2 | glioma tumor suppressor candidate    |
| NM_015710.2-700s1c1  | NM_015710 | GLTSCR2 | glioma tumor suppressor candidate    |
| NM_015711.1-3653s1c1 | NM_015711 | GLTSCR1 | glioma tumor suppressor candidate    |
| NM_015711.1-3723s1c1 | NM_015711 | GLTSCR1 | glioma tumor suppressor candidate    |
| NM_015711.1-3114s1c1 | NM_015711 | GLTSCR1 | glioma tumor suppressor candidate    |
| NM_015711.1-427s1c1  | NM_015711 | GLTSCR1 | glioma tumor suppressor candidate    |
| NM_015711.1-2217s1c1 | NM_015711 | GLTSCR1 | glioma tumor suppressor candidate    |
| NM_017744.4-739s1c1  | NM_017744 | ST7L    | suppression of tumorigenicity 7 like |
| NM_017744.4-1795s1c1 | NM_017744 | ST7L    | suppression of tumorigenicity 7 like |
| NM_017744.4-537s1c1  | NM_017744 | ST7L    | suppression of tumorigenicity 7 like |
| NM_017744.4-963s1c1  | NM_017744 | ST7L    | suppression of tumorigenicity 7 like |
| NM_017744.4-1969s1c1 | NM_017744 | ST7L    | suppression of tumorigenicity 7 like |
| XM_061871.7-9379s1c1 | XM_061871 | FAT3    | FAT tumor suppressor homolog 3       |
| XM_061871.7-3334s1c1 | XM_061871 | FAT3    | FAT tumor suppressor homolog 3       |
| XM_061871.7-7371s1c1 | XM_061871 | FAT3    | FAT tumor suppressor homolog 3       |
| XM_061871.7-745s1c1  | XM_061871 | FAT3    | FAT tumor suppressor homolog 3       |
| XM_061871.7-2440s1c1 | XM_061871 | FAT3    | FAT tumor suppressor homolog 3       |
| NM_080822.1-654s1c1  | NM_080822 | OVCA2   | candidate tumor suppressor in ova    |
| NM_080822.1-170s1c1  | NM_080822 | OVCA2   | candidate tumor suppressor in ova    |
| NM_080822.1-427s1c1  | NM_080822 | OVCA2   | candidate tumor suppressor in ova    |

|                      |           |        |                                      |
|----------------------|-----------|--------|--------------------------------------|
| NM_080822.1-547s1c1  | NM_080822 | OVCA2  | candidate tumor suppressor in ova    |
| NM_172367.1-792s1c1  | NM_172367 | TUSC5  | tumor suppressor candidate 5         |
| NM_172367.1-846s1c1  | NM_172367 | TUSC5  | tumor suppressor candidate 5         |
| NM_172367.1-720s1c1  | NM_172367 | TUSC5  | tumor suppressor candidate 5         |
| NM_172367.1-459s1c1  | NM_172367 | TUSC5  | tumor suppressor candidate 5         |
| NM_172367.1-822s1c1  | NM_172367 | TUSC5  | tumor suppressor candidate 5         |
| NM_002387.1-1332s1c1 | NM_002387 | MCC    | mutated in colorectal cancers        |
| NM_002387.1-2689s1c1 | NM_002387 | MCC    | mutated in colorectal cancers        |
| NM_002387.1-1388s1c1 | NM_002387 | MCC    | mutated in colorectal cancers        |
| NM_002387.1-2284s1c1 | NM_002387 | MCC    | mutated in colorectal cancers        |
| NM_006010.1-693s1c1  | NM_006010 | ARMET  | arginine-rich, mutated in early stag |
| NM_006010.1-501s1c1  | NM_006010 | ARMET  | arginine-rich, mutated in early stag |
| NM_006010.1-386s1c1  | NM_006010 | ARMET  | arginine-rich, mutated in early stag |
| NM_006010.1-642s1c1  | NM_006010 | ARMET  | arginine-rich, mutated in early stag |
| NM_006010.1-776s1c1  | NM_006010 | ARMET  | arginine-rich, mutated in early stag |
| NM_005106.2-1183s1c1 | NM_005106 | DLEC1  | deleted in lung and esophageal c     |
| NM_005106.2-646s1c1  | NM_005106 | DLEC1  | deleted in lung and esophageal c     |
| NM_005106.2-3571s1c1 | NM_005106 | DLEC1  | deleted in lung and esophageal c     |
| NM_005106.2-1610s1c1 | NM_005106 | DLEC1  | deleted in lung and esophageal c     |
| NM_004406.1-3444s1c1 | NM_004406 | DMBT1  | deleted in malignant brain tumors    |
| NM_004406.1-4221s1c1 | NM_004406 | DMBT1  | deleted in malignant brain tumors    |
| NM_004406.1-5157s1c1 | NM_004406 | DMBT1  | deleted in malignant brain tumors    |
| NM_004406.1-1553s1c1 | NM_004406 | DMBT1  | deleted in malignant brain tumors    |
| NM_004406.1-3753s1c1 | NM_004406 | DMBT1  | deleted in malignant brain tumors    |
| NM_000551.2-2372s1c1 | NM_000551 | VHL    | von Hippel-Lindau tumor suppress     |
| NM_000551.2-716s1c1  | NM_000551 | VHL    | von Hippel-Lindau tumor suppress     |
| NM_000551.2-772s1c1  | NM_000551 | VHL    | von Hippel-Lindau tumor suppress     |
| NM_000551.2-625s1c1  | NM_000551 | VHL    | von Hippel-Lindau tumor suppress     |
| NM_015247.1-4219s1c1 | NM_015247 | CYLD   | cylindromatosis (turban tumor sync   |
| NM_015247.1-474s1c1  | NM_015247 | CYLD   | cylindromatosis (turban tumor sync   |
| NM_015247.1-1669s1c1 | NM_015247 | CYLD   | cylindromatosis (turban tumor sync   |
| NM_015247.1-2573s1c1 | NM_015247 | CYLD   | cylindromatosis (turban tumor sync   |
| NM_015247.1-2059s1c1 | NM_015247 | CYLD   | cylindromatosis (turban tumor sync   |
| NM_004360.2-3859s1c1 | NM_004360 | CDH1   | cadherin 1, type 1, E-cadherin (ep   |
| NM_004360.2-1409s1c1 | NM_004360 | CDH1   | cadherin 1, type 1, E-cadherin (ep   |
| NM_004360.2-529s1c1  | NM_004360 | CDH1   | cadherin 1, type 1, E-cadherin (ep   |
| NM_004360.2-344s1c1  | NM_004360 | CDH1   | cadherin 1, type 1, E-cadherin (ep   |
| NM_004360.2-2057s1c1 | NM_004360 | CDH1   | cadherin 1, type 1, E-cadherin (ep   |
| NM_000251.1-2880s1c1 | NM_000251 | MSH2   | mutS homolog 2, colon cancer, nc     |
| NM_000251.1-441s1c1  | NM_000251 | MSH2   | mutS homolog 2, colon cancer, nc     |
| NM_000251.1-1050s1c1 | NM_000251 | MSH2   | mutS homolog 2, colon cancer, nc     |
| NM_000251.1-2582s1c1 | NM_000251 | MSH2   | mutS homolog 2, colon cancer, nc     |
| NM_000251.1-958s1c1  | NM_000251 | MSH2   | mutS homolog 2, colon cancer, nc     |
| NM_000076.1-1399s1c1 | NM_000076 | CDKN1C | cyclin-dependent kinase inhibitor 1  |
| NM_000076.1-1067s1c1 | NM_000076 | CDKN1C | cyclin-dependent kinase inhibitor 1  |
| NM_000076.1-312s1c1  | NM_000076 | CDKN1C | cyclin-dependent kinase inhibitor 1  |
| NM_000076.1-1073s1c1 | NM_000076 | CDKN1C | cyclin-dependent kinase inhibitor 1  |
| NM_000076.1-437s1c1  | NM_000076 | CDKN1C | cyclin-dependent kinase inhibitor 1  |
| NM_000267.1-8750s1c1 | NM_000267 | NF1    | neurofibromin 1 (neurofibromatosis   |
| NM_000267.1-8468s1c1 | NM_000267 | NF1    | neurofibromin 1 (neurofibromatosis   |
| NM_000267.1-1373s1c1 | NM_000267 | NF1    | neurofibromin 1 (neurofibromatosis   |
| NM_000267.1-6992s1c1 | NM_000267 | NF1    | neurofibromin 1 (neurofibromatosis   |

|                      |           |        |                                                   |
|----------------------|-----------|--------|---------------------------------------------------|
| NM_000267.1-8627s1c1 | NM_000267 | NF1    | neurofibromin 1 (neurofibromatosis)               |
| NM_058197.1-1335s1c1 | NM_058197 | CDKN2A | cyclin-dependent kinase inhibitor 2A              |
| NM_058197.1-484s1c1  | NM_058197 | CDKN2A | cyclin-dependent kinase inhibitor 2A              |
| NM_058197.1-623s1c1  | NM_058197 | CDKN2A | cyclin-dependent kinase inhibitor 2A              |
| NM_058197.1-518s1c1  | NM_058197 | CDKN2A | cyclin-dependent kinase inhibitor 2A              |
| NM_005215.1-4387s1c1 | NM_005215 | DCC    | deleted in colorectal carcinoma                   |
| NM_005215.1-2265s1c1 | NM_005215 | DCC    | deleted in colorectal carcinoma                   |
| NM_005215.1-2466s1c1 | NM_005215 | DCC    | deleted in colorectal carcinoma                   |
| NM_005215.1-736s1c1  | NM_005215 | DCC    | deleted in colorectal carcinoma                   |
| NM_005215.1-1820s1c1 | NM_005215 | DCC    | deleted in colorectal carcinoma                   |
| NM_007294.1-6116s1c1 | NM_007294 | BRCA1  | breast cancer 1, early onset                      |
| NM_007294.1-2036s1c1 | NM_007294 | BRCA1  | breast cancer 1, early onset                      |
| NM_007294.1-2037s1c1 | NM_007294 | BRCA1  | breast cancer 1, early onset                      |
| NM_007294.1-4632s1c1 | NM_007294 | BRCA1  | breast cancer 1, early onset                      |
| NM_007294.1-356s1c1  | NM_007294 | BRCA1  | breast cancer 1, early onset                      |
| NM_000268.2-4648s1c1 | NM_000268 | NF2    | neurofibromin 2 (bilateral acoustic neuroma)      |
| NM_000268.2-2092s1c1 | NM_000268 | NF2    | neurofibromin 2 (bilateral acoustic neuroma)      |
| NM_000268.2-1290s1c1 | NM_000268 | NF2    | neurofibromin 2 (bilateral acoustic neuroma)      |
| NM_000268.2-1191s1c1 | NM_000268 | NF2    | neurofibromin 2 (bilateral acoustic neuroma)      |
| NM_000268.2-1944s1c1 | NM_000268 | NF2    | neurofibromin 2 (bilateral acoustic neuroma)      |
| NM_003242.3-807s1c1  | NM_003242 | TGFBR2 | transforming growth factor, beta receptor type II |
| NM_003242.3-1599s1c1 | NM_003242 | TGFBR2 | transforming growth factor, beta receptor type II |
| NM_003242.3-416s1c1  | NM_003242 | TGFBR2 | transforming growth factor, beta receptor type II |
| NM_003242.3-1127s1c1 | NM_003242 | TGFBR2 | transforming growth factor, beta receptor type II |
| NM_003242.3-719s1c1  | NM_003242 | TGFBR2 | transforming growth factor, beta receptor type II |
| NM_005359.3-2038s1c1 | NM_005359 | SMAD4  | SMAD, mothers against DPP homologue 4             |
| NM_005359.3-1191s1c1 | NM_005359 | SMAD4  | SMAD, mothers against DPP homologue 4             |
| NM_005359.3-1692s1c1 | NM_005359 | SMAD4  | SMAD, mothers against DPP homologue 4             |
| NM_005359.3-636s1c1  | NM_005359 | SMAD4  | SMAD, mothers against DPP homologue 4             |
| NM_005359.3-1848s1c1 | NM_005359 | SMAD4  | SMAD, mothers against DPP homologue 4             |
| NM_053056.1-2322s1c1 | NM_053056 | CCND1  | cyclin D1 (PRAD1: parathyroid adenoma)            |
| NM_053056.1-680s1c1  | NM_053056 | CCND1  | cyclin D1 (PRAD1: parathyroid adenoma)            |
| NM_053056.1-539s1c1  | NM_053056 | CCND1  | cyclin D1 (PRAD1: parathyroid adenoma)            |
| NM_053056.1-326s1c1  | NM_053056 | CCND1  | cyclin D1 (PRAD1: parathyroid adenoma)            |
| NM_053056.1-728s1c1  | NM_053056 | CCND1  | cyclin D1 (PRAD1: parathyroid adenoma)            |
| NM_000264.2-6645s1c1 | NM_000264 | PTCH   | patched homolog (Drosophila)                      |
| NM_000264.2-1646s1c1 | NM_000264 | PTCH   | patched homolog (Drosophila)                      |
| NM_000264.2-1134s1c1 | NM_000264 | PTCH   | patched homolog (Drosophila)                      |
| NM_000264.2-3056s1c1 | NM_000264 | PTCH   | patched homolog (Drosophila)                      |
| NM_000264.2-429s1c1  | NM_000264 | PTCH   | patched homolog (Drosophila)                      |
| NM_000249.2-2358s1c1 | NM_000249 | MLH1   | mutL homolog 1, colon cancer, no mismatch repair  |
| NM_000249.2-2298s1c1 | NM_000249 | MLH1   | mutL homolog 1, colon cancer, no mismatch repair  |
| NM_000249.2-1927s1c1 | NM_000249 | MLH1   | mutL homolog 1, colon cancer, no mismatch repair  |
| NM_000249.2-565s1c1  | NM_000249 | MLH1   | mutL homolog 1, colon cancer, no mismatch repair  |
| NM_000249.2-2085s1c1 | NM_000249 | MLH1   | mutL homolog 1, colon cancer, no mismatch repair  |
| NM_024426.2-1962s1c1 | NM_024426 | WT1    | Wilms tumor 1                                     |
| NM_024426.2-1055s1c1 | NM_024426 | WT1    | Wilms tumor 1                                     |
| NM_024426.2-1372s1c1 | NM_024426 | WT1    | Wilms tumor 1                                     |
| NM_024426.2-1701s1c1 | NM_024426 | WT1    | Wilms tumor 1                                     |
| NM_024426.2-1330s1c1 | NM_024426 | WT1    | Wilms tumor 1                                     |
| NM_000633.1-2872s1c1 | NM_000633 | BCL2   | B-cell CLL/lymphoma 2                             |
| NM_000633.1-64s1c1   | NM_000633 | BCL2   | B-cell CLL/lymphoma 2                             |
| NM_000633.1-678s1c1  | NM_000633 | BCL2   | B-cell CLL/lymphoma 2                             |

|                       |           |        |                                     |
|-----------------------|-----------|--------|-------------------------------------|
| NM_000633.1-74s1c1    | NM_000633 | BCL2   | B-cell CLL/lymphoma 2               |
| NM_000633.1-550s1c1   | NM_000633 | BCL2   | B-cell CLL/lymphoma 2               |
| NM_000038.2-9031s1c1  | NM_000038 | APC    | adenomatosis polyposis coli         |
| NM_000038.2-6231s1c1  | NM_000038 | APC    | adenomatosis polyposis coli         |
| NM_000038.2-3940s1c1  | NM_000038 | APC    | adenomatosis polyposis coli         |
| NM_000038.2-4787s1c1  | NM_000038 | APC    | adenomatosis polyposis coli         |
| NM_000038.2-6089s1c1  | NM_000038 | APC    | adenomatosis polyposis coli         |
| NM_000244.2-2088s1c1  | NM_000244 | MEN1   | multiple endocrine neoplasia I      |
| NM_000244.2-785s1c1   | NM_000244 | MEN1   | multiple endocrine neoplasia I      |
| NM_000244.2-1878s1c1  | NM_000244 | MEN1   | multiple endocrine neoplasia I      |
| NM_000244.2-1364s1c1  | NM_000244 | MEN1   | multiple endocrine neoplasia I      |
| NM_000244.2-1212s1c1  | NM_000244 | MEN1   | multiple endocrine neoplasia I      |
| NM_000059.x-665s1c1   | NM_000059 | BRCA2  | breast cancer 2, early onset        |
| NM_000059.x-10567s1c1 | NM_000059 | BRCA2  | breast cancer 2, early onset        |
| NM_000389.x-526s1c1   | NM_000389 | CDKN1A | cyclin-dependent kinase inhibitor 1 |
| NM_000389.x-934s1c1   | NM_000389 | CDKN1A | cyclin-dependent kinase inhibitor 1 |
| NM_000321.x-450s1c1   | NM_000321 | RB1    | retinoblastoma 1 (including osteos  |
| NM_000321.x-4584s1c1  | NM_000321 | RB1    | retinoblastoma 1 (including osteos  |
| NM_002110.x-1122s1c1  | NM_002110 | HCK    | hemopoietic cell kinase             |
| NM_002110.x-261s1c1   | NM_002110 | HCK    | hemopoietic cell kinase             |
| NM_002110.x-369s1c1   | NM_002110 | HCK    | hemopoietic cell kinase             |
| NM_002110.x-412s1c1   | NM_002110 | HCK    | hemopoietic cell kinase             |
| NM_002110.x-742s1c1   | NM_002110 | HCK    | hemopoietic cell kinase             |
|                       | NM_001455 | FoxO3A |                                     |
|                       | NM_014009 | FoxP3  |                                     |
|                       | NM_015557 | CHD5   |                                     |
|                       |           | SHC002 |                                     |

molog 2 (Drosophila)  
molog 2 (Drosophila)  
molog 2 (Drosophila)  
molog 2 (Drosophila)  
molog 2 (Drosophila)

molog 1 (Drosophila)  
molog 1 (Drosophila)  
molog 1 (Drosophila)  
molog 1 (Drosophila)  
molog 1 (Drosophila)  
‣ (phosphoprotein NCP94)  
(mutated in multiple advanced cancers 1)  
rdrome)  
rdrome)  
rdrome)  
rdrome)

(Drosophila)

(Drosophila)

(Drosophila)

(Drosophila)

(Drosophila)

polymerase II complex component, homolog (S. cerevisiae)

breast carcinoma) (zinc finger protein)

1

1

1

1

1

pressor 1

pressor 1

pressor 1

pressor 1

nal oncogene homolog

E. coli) (S. cerevisiae)

E. coli) (S. cerevisiae)

E. coli) (S. cerevisiae)

E. coli) (S. cerevisiae)

pressor 2  
pressor 2  
pressor 2  
pressor 2

(Drosophila)  
(Drosophila)  
(Drosophila)  
(Drosophila)  
(Drosophila)

norigenicity 1  
norigenicity 1  
norigenicity 1  
norigenicity 1  
norigenicity 1

colon carcinoma) (Hsp70 interacting protein)  
colon carcinoma, matriptase, epithin)  
candidate 1  
candidate 1  
candidate 1  
candidate 1



» candidate 1

» candidate 4  
» candidate 4  
» candidate 4  
» candidate 4

e region gene 2  
e region gene 1  
e region gene 1  
e region gene 1  
e region gene 1  
e region gene 1

»

»

»

»

»

(Drosophila)

(Drosophila)

(Drosophila)

(Drosophila)

(Drosophila)

arian cancer 2

arian cancer 2

arian cancer 2

arian cancer 2

je tumors  
je tumors  
je tumors  
je tumors  
je tumors  
ancer 1  
ancer 1  
ancer 1  
ancer 1  
1  
1  
1  
1  
1  
:or  
:or  
:or  
:or

lrome)  
lrome)  
lrome)  
lrome)  
lrome)  
ithelial)  
ithelial)  
ithelial)  
ithelial)  
ithelial)  
nopolyposis type 1 (E. coli)  
IC (p57, Kip2)  
s, von Recklinghausen disease, Watson disease)  
s, von Recklinghausen disease, Watson disease)  
s, von Recklinghausen disease, Watson disease)  
s, von Recklinghausen disease, Watson disease)

s, von Recklinghausen disease, Watson disease)

2A (melanoma, p16, inhibits CDK4)

neuroma)

neuroma)

neuroma)

neuroma)

neuroma)

receptor II (70/80kDa)

olog 4 (Drosophila)

enomatosis 1)

enomatosis 1)

enomatosis 1)

enomatosis 1)

enomatosis 1)

mpolyposis type 2 (E. coli)

IA (p21, Cip1)  
IA (p21, Cip1)  
:arcoma)  
:arcoma)



































AnnotatedResults

|       |         |             |           |                      |           |
|-------|---------|-------------|-----------|----------------------|-----------|
| 29997 | GLTSCR2 | glioma tumo | NM_015710 | NM_015710.2-166s1c1  | TRCN00000 |
| 29997 | GLTSCR2 | glioma tumo | NM_015710 | NM_015710.2-1429s1c1 | TRCN00000 |
| 29997 | GLTSCR2 | glioma tumo | NM_015710 | NM_015710.2-784s1c1  | TRCN00000 |
| 29997 | GLTSCR2 | glioma tumo | NM_015710 | NM_015710.2-700s1c1  | TRCN00000 |
| 29997 | GLTSCR2 | glioma tumo | NM_015710 | NM_015710.2-343s1c1  | TRCN00000 |
| 29997 | GLTSCR2 | glioma tumo | NM_015710 | NM_015710.2-166s1c1  | TRCN00000 |
| 29997 | GLTSCR2 | glioma tumo | NM_015710 | NM_015710.2-1429s1c1 | TRCN00000 |
| 29997 | GLTSCR2 | glioma tumo | NM_015710 | NM_015710.2-784s1c1  | TRCN00000 |
| 29997 | GLTSCR2 | glioma tumo | NM_015710 | NM_015710.2-700s1c1  | TRCN00000 |
| 29997 | GLTSCR2 | glioma tumo | NM_015710 | NM_015710.2-343s1c1  | TRCN00000 |
| 29997 | GLTSCR2 | glioma tumo | NM_015710 | NM_015710.2-166s1c1  | TRCN00000 |
| 29997 | GLTSCR2 | glioma tumo | NM_015710 | NM_015710.2-1429s1c1 | TRCN00000 |
| 29997 | GLTSCR2 | glioma tumo | NM_015710 | NM_015710.2-784s1c1  | TRCN00000 |
| 3055  | HCK     | hemopoietic | NM_002110 | NM_002110.x-1122s1c1 | TRCN00000 |
| 3055  | HCK     | hemopoietic | NM_002110 | NM_002110.x-261s1c1  | TRCN00000 |
| 3055  | HCK     | hemopoietic | NM_002110 | NM_002110.x-369s1c1  | TRCN00000 |
| 3055  | HCK     | hemopoietic | NM_002110 | NM_002110.x-742s1c1  | TRCN00000 |
| 3055  | HCK     | hemopoietic | NM_002110 | NM_002110.x-1122s1c1 | TRCN00000 |
| 3055  | HCK     | hemopoietic | NM_002110 | NM_002110.x-261s1c1  | TRCN00000 |
| 3055  | HCK     | hemopoietic | NM_002110 | NM_002110.x-369s1c1  | TRCN00000 |
| 3055  | HCK     | hemopoietic | NM_002110 | NM_002110.x-742s1c1  | TRCN00000 |
| 3055  | HCK     | hemopoietic | NM_002110 | NM_002110.x-1122s1c1 | TRCN00000 |
| 3055  | HCK     | hemopoietic | NM_002110 | NM_002110.x-261s1c1  | TRCN00000 |
| 3055  | HCK     | hemopoietic | NM_002110 | NM_002110.x-369s1c1  | TRCN00000 |
| 3055  | HCK     | hemopoietic | NM_002110 | NM_002110.x-742s1c1  | TRCN00000 |
| 3055  | HCK     | hemopoietic | NM_002110 | NM_002110.x-1122s1c1 | TRCN00000 |
| 3055  | HCK     | hemopoietic | NM_002110 | NM_002110.x-261s1c1  | TRCN00000 |
| 3055  | HCK     | hemopoietic | NM_002110 | NM_002110.x-369s1c1  | TRCN00000 |
| 3055  | HCK     | hemopoietic | NM_002110 | NM_002110.x-742s1c1  | TRCN00000 |
| 3055  | HCK     | hemopoietic | NM_002110 | NM_002110.x-1122s1c1 | TRCN00000 |
| 3055  | HCK     | hemopoietic | NM_002110 | NM_002110.x-261s1c1  | TRCN00000 |
| 3055  | HCK     | hemopoietic | NM_002110 | NM_002110.x-369s1c1  | TRCN00000 |
| 3055  | HCK     | hemopoietic | NM_002110 | NM_002110.x-742s1c1  | TRCN00000 |
| Hela  |         | Hela        |           |                      |           |
| Hela  |         | Hela        |           |                      |           |
| Hela  |         | Hela        |           |                      |           |
| Hela  |         | Hela        |           |                      |           |
| Hela  |         | Hela        |           |                      |           |
| Hela  |         | Hela        |           |                      |           |
| Hela  |         | Hela        |           |                      |           |
| Hela  |         | Hela        |           |                      |           |
| Hela  |         | Hela        |           |                      |           |
| Hela  |         | Hela        |           |                      |           |
| Hela  |         | Hela        |           |                      |           |
| Hela  |         | Hela        |           |                      |           |
| Hela  |         | Hela        |           |                      |           |
| Hela  |         | Hela        |           |                      |           |
| Hela  |         | Hela        |           |                      |           |
| Hela  |         | Hela        |           |                      |           |
| Hela  |         | Hela        |           |                      |           |
| Hela  |         | Hela        |           |                      |           |
| Hela  |         | Hela        |           |                      |           |
| Hela  |         | Hela        |           |                      |           |
| 3090  | HIC1    | hypermethyl | NM_006497 | NM_006497.1-392s1c1  | TRCN00000 |
| 3090  | HIC1    | hypermethyl | NM_006497 | NM_006497.1-941s1c1  | TRCN00000 |
| 3090  | HIC1    | hypermethyl | NM_006497 | NM_006497.1-1982s1c1 | TRCN00000 |







## AnnotatedResults

|              |       |                               |                      |           |
|--------------|-------|-------------------------------|----------------------|-----------|
| <b>84445</b> | LZTS2 | leucine zippe NM_032429       | NM_032429.1-459s1c1  | TRCN00000 |
| <b>84445</b> | LZTS2 | leucine zippe NM_032429       | NM_032429.1-2058s1c1 | TRCN00000 |
| <b>84445</b> | LZTS2 | leucine zippe NM_032429       | NM_032429.1-717s1c1  | TRCN00000 |
| <b>84445</b> | LZTS2 | leucine zippe NM_032429       | NM_032429.1-1726s1c1 | TRCN00000 |
| <b>84445</b> | LZTS2 | leucine zippe NM_032429       | NM_032429.1-459s1c1  | TRCN00000 |
| <b>84445</b> | LZTS2 | leucine zippe NM_032429       | NM_032429.1-2058s1c1 | TRCN00000 |
| <b>84445</b> | LZTS2 | leucine zippe NM_032429       | NM_032429.1-717s1c1  | TRCN00000 |
| <b>84445</b> | LZTS2 | leucine zippe NM_032429       | NM_032429.1-1726s1c1 | TRCN00000 |
| <b>84445</b> | LZTS2 | leucine zippe NM_032429       | NM_032429.1-459s1c1  | TRCN00000 |
| <b>84445</b> | LZTS2 | leucine zippe NM_032429       | NM_032429.1-2058s1c1 | TRCN00000 |
| <b>84445</b> | LZTS2 | leucine zippe NM_032429       | NM_032429.1-717s1c1  | TRCN00000 |
| <b>84445</b> | LZTS2 | leucine zippe NM_032429       | NM_032429.1-1726s1c1 | TRCN00000 |
| <b>84445</b> | LZTS2 | leucine zippe NM_032429       | NM_032429.1-459s1c1  | TRCN00000 |
| <b>84445</b> | LZTS2 | leucine zippe NM_032429       | NM_032429.1-2058s1c1 | TRCN00000 |
| <b>84445</b> | LZTS2 | leucine zippe NM_032429       | NM_032429.1-717s1c1  | TRCN00000 |
| <b>4163</b>  | MCC   | mutated in $\alpha$ NM_002387 | NM_002387.1-1332s1c1 | TRCN00000 |
| <b>4163</b>  | MCC   | mutated in $\alpha$ NM_002387 | NM_002387.1-2689s1c1 | TRCN00000 |
| <b>4163</b>  | MCC   | mutated in $\alpha$ NM_002387 | NM_002387.1-1388s1c1 | TRCN00000 |
| <b>4163</b>  | MCC   | mutated in $\alpha$ NM_002387 | NM_002387.1-2284s1c1 | TRCN00000 |
| <b>4163</b>  | MCC   | mutated in $\alpha$ NM_002387 | NM_002387.1-1332s1c1 | TRCN00000 |
| <b>4163</b>  | MCC   | mutated in $\alpha$ NM_002387 | NM_002387.1-2689s1c1 | TRCN00000 |
| <b>4163</b>  | MCC   | mutated in $\alpha$ NM_002387 | NM_002387.1-1388s1c1 | TRCN00000 |
| <b>4163</b>  | MCC   | mutated in $\alpha$ NM_002387 | NM_002387.1-2284s1c1 | TRCN00000 |
| <b>4163</b>  | MCC   | mutated in $\alpha$ NM_002387 | NM_002387.1-1332s1c1 | TRCN00000 |
| <b>4163</b>  | MCC   | mutated in $\alpha$ NM_002387 | NM_002387.1-2689s1c1 | TRCN00000 |
| <b>4163</b>  | MCC   | mutated in $\alpha$ NM_002387 | NM_002387.1-1388s1c1 | TRCN00000 |
| <b>4163</b>  | MCC   | mutated in $\alpha$ NM_002387 | NM_002387.1-2284s1c1 | TRCN00000 |
| <b>4163</b>  | MCC   | mutated in $\alpha$ NM_002387 | NM_002387.1-1332s1c1 | TRCN00000 |
| <b>4163</b>  | MCC   | mutated in $\alpha$ NM_002387 | NM_002387.1-2689s1c1 | TRCN00000 |
| <b>4163</b>  | MCC   | mutated in $\alpha$ NM_002387 | NM_002387.1-1388s1c1 | TRCN00000 |
| <b>4163</b>  | MCC   | mutated in $\alpha$ NM_002387 | NM_002387.1-2284s1c1 | TRCN00000 |
| <b>4163</b>  | MCC   | mutated in $\alpha$ NM_002387 | NM_002387.1-1332s1c1 | TRCN00000 |
| <b>4163</b>  | MCC   | mutated in $\alpha$ NM_002387 | NM_002387.1-2689s1c1 | TRCN00000 |
| <b>4163</b>  | MCC   | mutated in $\alpha$ NM_002387 | NM_002387.1-1388s1c1 | TRCN00000 |
| <b>4163</b>  | MCC   | mutated in $\alpha$ NM_002387 | NM_002387.1-2284s1c1 | TRCN00000 |
|              | MCF7  | MCF7                          |                      |           |
| <b>4221</b>  | MEN1  | multiple endo NM_000244       | NM_000244.2-2088s1c1 | TRCN00000 |



































AnnotatedResults

|      |     |             |           |                      |           |
|------|-----|-------------|-----------|----------------------|-----------|
| 7490 | WT1 | Wilms tumo1 | NM_024426 | NM_024426.2-1701s1c1 | TRCN00000 |
| 7490 | WT1 | Wilms tumo1 | NM_024426 | NM_024426.2-1330s1c1 | TRCN00000 |
| 7490 | WT1 | Wilms tumo1 | NM_024424 | NM_024424.x-2140s1c1 | TRCN00000 |
| 7490 | WT1 | Wilms tumo1 | NM_024424 | NM_024424.x-904s1c1  | TRCN00000 |
| 7490 | WT1 | Wilms tumo1 | NM_024424 | NM_024424.x-588s1c1  | TRCN00000 |
| 7490 | WT1 | Wilms tumo1 | NM_024424 | NM_024424.x-1440s1c1 | TRCN00000 |
| 7490 | WT1 | Wilms tumo1 | NM_024426 | NM_024426.2-1962s1c1 | TRCN00000 |
| 7490 | WT1 | Wilms tumo1 | NM_024426 | NM_024426.2-1055s1c1 | TRCN00000 |
| 7490 | WT1 | Wilms tumo1 | NM_024426 | NM_024426.2-1372s1c1 | TRCN00000 |
| 7490 | WT1 | Wilms tumo1 | NM_024426 | NM_024426.2-1701s1c1 | TRCN00000 |
| 7490 | WT1 | Wilms tumo1 | NM_024426 | NM_024426.2-1330s1c1 | TRCN00000 |
| 7490 | WT1 | Wilms tumo1 | NM_024424 | NM_024424.x-2140s1c1 | TRCN00000 |
| 7490 | WT1 | Wilms tumo1 | NM_024424 | NM_024424.x-904s1c1  | TRCN00000 |
| 7490 | WT1 | Wilms tumo1 | NM_024424 | NM_024424.x-588s1c1  | TRCN00000 |
| 7490 | WT1 | Wilms tumo1 | NM_024424 | NM_024424.x-1440s1c1 | TRCN00000 |
| 7490 | WT1 | Wilms tumo1 | NM_024426 | NM_024426.2-1962s1c1 | TRCN00000 |
| 7490 | WT1 | Wilms tumo1 | NM_024426 | NM_024426.2-1055s1c1 | TRCN00000 |
| 7490 | WT1 | Wilms tumo1 | NM_024426 | NM_024426.2-1372s1c1 | TRCN00000 |
| 7490 | WT1 | Wilms tumo1 | NM_024426 | NM_024426.2-1701s1c1 | TRCN00000 |
| 7490 | WT1 | Wilms tumo1 | NM_024426 | NM_024426.2-1330s1c1 | TRCN00000 |



AnnotatedResults

| TotalNumC | TotalNumC | Marker1Flu | Marker1Flu | Marker2Flu | Marker2Flu | NumCellsM | TotalNumM |
|-----------|-----------|------------|------------|------------|------------|-----------|-----------|
| 15        | 0         | 181.080978 | 115.63383  | 42.226205  | 108.844235 | 2         | 0         |
| 18        | 5         | 175.35817  | 105.925505 | 163.96864  | 209.830909 | 4         | 1         |
| 5         | 0         | 203.892869 | 107.88609  | 76.810756  | 115.816153 | 1         | 0         |
| 4         | 0         | 507.72152  | 349.383735 | 262.068835 | 519.320524 | 2         | 0         |
| 8         | 2         | 453.467443 | 201.195883 | 334.340826 | 934.820755 | 6         | 2         |
| 19        | 0         | 217.828321 | 239.893821 | 57.547019  | 128.207364 | 2         | 0         |
| 33        | 0         | 207.105611 | 206.692176 | 137.056398 | 207.040081 | 1         | 0         |
| 10        | 0         | 134.484866 | 94.099405  | 38.894327  | 88.567363  | 0         | 0         |
| 11        | 0         | 491.286204 | 324.676667 | 162.780202 | 366.517378 | 4         | 0         |
| 18        | 0         | 389.195928 | 200.952086 | 380.886331 | 883.411278 | 3         | 0         |
| 19        | 0         | 217.828321 | 239.893821 | 57.547019  | 128.207364 | 2         | 0         |
| 33        | 0         | 207.105611 | 206.692176 | 137.056398 | 207.040081 | 1         | 0         |
| 10        | 0         | 134.484866 | 94.099405  | 38.894327  | 88.567363  | 0         | 0         |
| 11        | 0         | 491.286204 | 324.676667 | 162.780202 | 366.517378 | 4         | 0         |
| 18        | 0         | 389.195928 | 200.952086 | 380.886331 | 883.411278 | 3         | 0         |
| 26        | 0         | 264.052939 | 415.78399  | 40.520429  | 99.461     | 2         | 0         |
| 21        | 0         | 398.40225  | 764.383629 | 343.65848  | 769.430182 | 2         | 0         |
| 8         | 0         | 195.52563  | 171.734092 | 0          | 0          | 0         | 0         |
| 16        | 0         | 430.454765 | 332.624355 | 203.252859 | 812.150882 | 2         | 0         |
| 11        | 0         | 656.170569 | 477.255784 | 512.84407  | 1132.01264 | 4         | 0         |
| 33        | 0         | 231.367398 | 370.600552 | 33.895798  | 94.030232  | 2         | 0         |
| 35        | 0         | 367.149861 | 625.097284 | 224.936236 | 611.586099 | 4         | 0         |
| 14        | 0         | 221.969703 | 167.292915 | 172.56746  | 432.642817 | 0         | 0         |
| 40        | 0         | 523.961934 | 607.259752 | 85.577748  | 513.143696 | 7         | 0         |
| 29        | 0         | 476.425514 | 343.092137 | 214.553211 | 713.390802 | 5         | 0         |
| 33        | 0         | 231.367398 | 370.600552 | 33.895798  | 94.030232  | 2         | 0         |
| 35        | 0         | 367.149861 | 625.097284 | 224.936236 | 611.586099 | 4         | 0         |
| 14        | 0         | 221.969703 | 167.292915 | 172.56746  | 432.642817 | 0         | 0         |
| 40        | 0         | 523.961934 | 607.259752 | 85.577748  | 513.143696 | 7         | 0         |
| 29        | 0         | 476.425514 | 343.092137 | 214.553211 | 713.390802 | 5         | 0         |
| 65        | 11        | 347.046955 | 434.712673 | 27.75381   | 122.734248 | 21        | 3         |
| 17        | 0         | 532.527701 | 706.519793 | 145.056823 | 338.762879 | 8         | 0         |
| 92        | 22        | 532.39497  | 631.280547 | 145.451705 | 457.072803 | 52        | 13        |
| 10        | 0         | 415.816955 | 674.469355 | 10.961396  | 34.662979  | 3         | 0         |
| 7         | 0         | 155.475282 | 87.035961  | 0.346051   | 0.915566   | 1         | 0         |
| 88        | 0         | 370.083652 | 524.297022 | 27.844155  | 123.720506 | 13        | 0         |
| 23        | 0         | 538.510447 | 669.971424 | 178.015177 | 385.376255 | 6         | 0         |
| 98        | 0         | 614.309097 | 768.130971 | 150.48549  | 480.374795 | 27        | 0         |
| 11        | 0         | 512.076536 | 732.768069 | 117.752079 | 194.885008 | 3         | 0         |
| 9         | 0         | 210.923375 | 218.853398 | 0.269151   | 0.807453   | 1         | 0         |
| 88        | 0         | 370.083652 | 524.297022 | 27.844155  | 123.720506 | 13        | 0         |
| 23        | 0         | 538.510447 | 669.971424 | 178.015177 | 385.376255 | 6         | 0         |
| 98        | 0         | 614.309097 | 768.130971 | 150.48549  | 480.374795 | 27        | 0         |
| 11        | 0         | 512.076536 | 732.768069 | 117.752079 | 194.885008 | 3         | 0         |
| 9         | 0         | 210.923375 | 218.853398 | 0.269151   | 0.807453   | 1         | 0         |
| 93        | 0         | 248.205682 | 267.255242 | 9.90028    | 43.202982  | 7         | 0         |
| 24        | 0         | 621.372297 | 892.079568 | 143.824878 | 457.357978 | 6         | 0         |
| 52        | 0         | 475.001247 | 695.014116 | 79.627037  | 237.153839 | 8         | 0         |
| 22        | 0         | 421.775835 | 913.533664 | 27.800136  | 121.83227  | 2         | 0         |
| 20        | 0         | 197.607357 | 145.4544   | 44.188046  | 113.390484 | 1         | 0         |
| 109       | 0         | 240.004976 | 268.302871 | 9.538796   | 40.701059  | 9         | 0         |
| 32        | 0         | 523.77995  | 797.479883 | 107.868659 | 398.997491 | 7         | 0         |
| 68        | 0         | 480.045583 | 712.114554 | 49.86864   | 168.014492 | 11        | 0         |
| 31        | 0         | 498.542546 | 1043.56762 | 36.349992  | 137.986292 | 4         | 0         |
| 30        | 0         | 198.900919 | 142.195608 | 31.815734  | 102.737576 | 1         | 0         |
| 109       | 0         | 240.004976 | 268.302871 | 9.538796   | 40.701059  | 9         | 0         |
| 32        | 0         | 523.77995  | 797.479883 | 107.868659 | 398.997491 | 7         | 0         |

## AnnotatedResults

|     |     |            |            |            |            |     |    |
|-----|-----|------------|------------|------------|------------|-----|----|
| 68  | 0   | 480.045583 | 712.114554 | 49.86864   | 168.014492 | 11  | 0  |
| 31  | 0   | 498.542546 | 1043.56762 | 36.349992  | 137.986292 | 4   | 0  |
| 30  | 0   | 198.900919 | 142.195608 | 31.815734  | 102.737576 | 1   | 0  |
| 81  | 26  | 267.139846 | 231.501512 | 19.924012  | 45.581352  | 30  | 11 |
| 67  | 5   | 308.648174 | 402.973157 | 39.144851  | 198.322105 | 18  | 1  |
| 135 | 26  | 588.495105 | 781.737155 | 270.639068 | 596.325113 | 81  | 19 |
| 2   | 0   | 171.512499 | 90.300537  | 0          | 0          | 0   | 0  |
| 92  | 15  | 248.701795 | 202.670906 | 14.467027  | 40.403702  | 6   | 1  |
| 84  | 0   | 269.54892  | 348.063697 | 32.404277  | 178.494499 | 5   | 0  |
| 168 | 11  | 588.808204 | 777.17478  | 234.885165 | 555.488203 | 35  | 0  |
| 3   | 0   | 168.457795 | 64.070954  | 86.516129  | 149.850331 | 0   | 0  |
| 92  | 15  | 248.701795 | 202.670906 | 14.467027  | 40.403702  | 6   | 1  |
| 84  | 0   | 269.54892  | 348.063697 | 32.404277  | 178.494499 | 5   | 0  |
| 168 | 25  | 588.808204 | 777.17478  | 234.885165 | 555.488203 | 35  | 5  |
| 3   | 0   | 168.457795 | 64.070954  | 86.516129  | 149.850331 | 0   | 0  |
| 105 | 11  | 285.687808 | 439.815777 | 25.439437  | 64.751541  | 7   | 1  |
| 84  | 0   | 328.521477 | 551.347106 | 33.578311  | 207.242673 | 10  | 0  |
| 176 | 0   | 521.760168 | 697.863229 | 284.496043 | 727.379905 | 31  | 0  |
| 46  | 0   | 237.931066 | 170.688235 | 30.397384  | 74.411826  | 3   | 0  |
| 135 | 12  | 286.295644 | 439.765486 | 25.040988  | 68.850424  | 12  | 1  |
| 97  | 0   | 325.589548 | 524.858996 | 36.790824  | 200.118712 | 11  | 0  |
| 223 | 0   | 523.533001 | 738.850374 | 254.992094 | 706.910087 | 38  | 0  |
| 64  | 0   | 233.7011   | 212.969329 | 27.666986  | 69.609965  | 5   | 0  |
| 135 | 12  | 286.295644 | 439.765486 | 25.040988  | 68.850424  | 12  | 1  |
| 97  | 0   | 325.589548 | 524.858996 | 36.790824  | 200.118712 | 11  | 0  |
| 223 | 22  | 523.533001 | 738.850374 | 254.992094 | 706.910087 | 38  | 2  |
| 64  | 0   | 233.7011   | 212.969329 | 27.666986  | 69.609965  | 5   | 0  |
| 38  | 5   | 543.304513 | 495.668873 | 16.434288  | 91.180735  | 30  | 5  |
| 13  | 2   | 238.371839 | 163.866257 | 10.166379  | 28.46197   | 4   | 1  |
| 54  | 21  | 305.359235 | 239.857807 | 395.286348 | 823.827088 | 22  | 8  |
| 65  | 14  | 249.173975 | 283.83901  | 57.846019  | 392.377615 | 19  | 7  |
| 125 | 49  | 438.269947 | 612.949931 | 214.898152 | 493.503106 | 69  | 28 |
| 50  | 0   | 630.300619 | 571.927114 | 50.048845  | 243.559007 | 16  | 0  |
| 23  | 0   | 312.245879 | 273.728948 | 7.124479   | 22.624259  | 2   | 0  |
| 57  | 16  | 318.417004 | 270.585075 | 450.598616 | 940.484171 | 8   | 2  |
| 65  | 0   | 242.175027 | 288.10442  | 55.12217   | 329.030793 | 5   | 0  |
| 140 | 0   | 429.219424 | 569.727491 | 192.634094 | 497.598734 | 11  | 0  |
| 50  | 0   | 630.300619 | 571.927114 | 50.048845  | 243.559007 | 16  | 0  |
| 23  | 0   | 312.245879 | 273.728948 | 7.124479   | 22.624259  | 2   | 0  |
| 57  | 16  | 318.417004 | 270.585075 | 450.598616 | 940.484171 | 8   | 2  |
| 65  | 0   | 242.175027 | 288.10442  | 55.12217   | 329.030793 | 5   | 0  |
| 140 | 13  | 429.219424 | 569.727491 | 192.634094 | 497.598734 | 11  | 0  |
| 42  | 0   | 532.81432  | 543.306354 | 91.249761  | 388.965263 | 11  | 0  |
| 40  | 0   | 374.28738  | 451.031331 | 42.633381  | 119.691107 | 6   | 0  |
| 68  | 11  | 278.904514 | 234.880085 | 359.077107 | 966.162773 | 6   | 1  |
| 72  | 0   | 243.033958 | 270.196669 | 101.503841 | 477.027965 | 6   | 0  |
| 159 | 0   | 421.895192 | 460.384841 | 373.342578 | 889.54793  | 14  | 0  |
| 54  | 0   | 528.128396 | 484.016268 | 76.512841  | 344.478766 | 17  | 0  |
| 62  | 0   | 339.304887 | 406.067395 | 38.717758  | 108.784585 | 8   | 0  |
| 89  | 12  | 286.306663 | 248.599203 | 304.646391 | 948.936011 | 7   | 2  |
| 89  | 0   | 260.380354 | 375.605691 | 85.591977  | 430.92796  | 8   | 0  |
| 187 | 0   | 411.990625 | 447.299145 | 353.13167  | 861.564348 | 18  | 0  |
| 54  | 0   | 528.128396 | 484.016268 | 76.512841  | 344.478766 | 17  | 0  |
| 62  | 0   | 339.304887 | 406.067395 | 38.717758  | 108.784585 | 8   | 0  |
| 89  | 12  | 286.306663 | 248.599203 | 304.646391 | 948.936011 | 7   | 2  |
| 89  | 0   | 260.380354 | 375.605691 | 85.591977  | 430.92796  | 8   | 0  |
| 187 | 15  | 411.990625 | 447.299145 | 353.13167  | 861.564348 | 18  | 2  |
| 271 | 103 | 547.617584 | 579.534615 | 191.713104 | 514.316937 | 179 | 79 |

AnnotatedResults

|     |     |            |            |            |            |     |    |
|-----|-----|------------|------------|------------|------------|-----|----|
| 85  | 32  | 225.962248 | 333.397462 | 88.693827  | 194.161823 | 13  | 3  |
| 155 | 23  | 291.304508 | 271.70496  | 53.740171  | 173.0328   | 49  | 5  |
| 65  | 16  | 168.064147 | 164.203175 | 11.310995  | 40.658253  | 11  | 0  |
| 168 | 53  | 840.312022 | 1267.30682 | 344.6861   | 784.356025 | 104 | 43 |
| 288 | 0   | 540.104942 | 540.309627 | 187.041208 | 506.365013 | 74  | 0  |
| 99  | 0   | 224.24534  | 314.911232 | 98.516096  | 209.169752 | 4   | 0  |
| 165 | 0   | 281.062715 | 258.149695 | 59.388881  | 173.746307 | 15  | 0  |
| 73  | 0   | 162.614422 | 192.45145  | 11.947991  | 40.847307  | 2   | 0  |
| 201 | 15  | 882.524    | 1359.42    | 345.685    | 775.503    | 54  | 15 |
| 288 | 46  | 540.104942 | 540.309627 | 187.041208 | 506.365013 | 74  | 15 |
| 99  | 6   | 224.24534  | 314.911232 | 98.516096  | 209.169752 | 4   | 2  |
| 165 | 0   | 281.062715 | 258.149695 | 59.388881  | 173.746307 | 15  | 0  |
| 73  | 0   | 162.614422 | 192.45145  | 11.947991  | 40.847307  | 2   | 0  |
| 201 | 28  | 882.52412  | 1359.42494 | 345.685431 | 775.50321  | 54  | 21 |
| 288 | 0   | 553.791    | 589.161472 | 279.307442 | 724.766012 | 75  | 0  |
| 131 | 0   | 208.169783 | 206.388598 | 86.166623  | 186.272595 | 3   | 0  |
| 164 | 0   | 268.763769 | 260.193134 | 77.467206  | 221.782382 | 14  | 0  |
| 96  | 0   | 177.31401  | 173.634515 | 23.588327  | 68.957343  | 5   | 0  |
| 166 | 13  | 737.988295 | 1043.7436  | 403.453292 | 757.759168 | 40  | 13 |
| 323 | 0   | 543.780391 | 573.364166 | 251.338802 | 686.127526 | 82  | 0  |
| 142 | 0   | 220.646489 | 279.696712 | 78.592527  | 180.150706 | 4   | 0  |
| 185 | 0   | 262.952248 | 261.701805 | 71.938583  | 218.031631 | 16  | 0  |
| 119 | 0   | 214.632329 | 263.014042 | 32.26799   | 132.158178 | 8   | 0  |
| 187 | 13  | 700.027188 | 1010.30921 | 368.020202 | 729.874993 | 42  | 13 |
| 323 | 35  | 543.780391 | 573.364166 | 251.338802 | 686.127526 | 82  | 12 |
| 142 | 6   | 220.646489 | 279.696712 | 78.592527  | 180.150706 | 4   | 0  |
| 185 | 0   | 262.952248 | 261.701805 | 71.938583  | 218.031631 | 16  | 0  |
| 119 | 0   | 214.632329 | 263.014042 | 32.26799   | 132.158178 | 8   | 0  |
| 187 | 25  | 700.027188 | 1010.30921 | 368.020202 | 729.874993 | 42  | 14 |
| 70  | 10  | 344.564714 | 657.881078 | 19.702789  | 62.707327  | 13  | 0  |
| 40  | 4   | 808.18026  | 1036.58504 | 107.163087 | 429.67756  | 28  | 4  |
| 219 | 102 | 544.158304 | 580.664342 | 145.719499 | 461.565519 | 155 | 78 |
| 245 | 118 | 590.683869 | 669.212196 | 541.118983 | 884.326008 | 176 | 95 |
| 85  | 0   | 350.033539 | 631.349399 | 46.74999   | 159.536245 | 8   | 0  |
| 57  | 0   | 802.2254   | 946.219788 | 223.435459 | 524.457864 | 18  | 0  |
| 240 | 23  | 551.287488 | 630.086977 | 154.965147 | 468.236606 | 56  | 0  |
| 247 | 45  | 607.068739 | 682.345081 | 621.860653 | 949.855933 | 76  | 8  |
| 85  | 0   | 350.033539 | 631.349399 | 46.74999   | 159.536245 | 8   | 0  |
| 57  | 0   | 802.2254   | 946.219788 | 223.435459 | 524.457864 | 18  | 0  |
| 240 | 36  | 551.287488 | 630.086977 | 154.965147 | 468.236606 | 56  | 9  |
| 247 | 78  | 607.068739 | 682.345081 | 621.860653 | 949.855933 | 76  | 24 |
| 89  | 0   | 294.535054 | 426.509481 | 53.493836  | 164.234427 | 10  | 0  |
| 83  | 0   | 533.691171 | 623.300728 | 156.786502 | 478.800552 | 15  | 0  |
| 258 | 25  | 629.4638   | 713.73623  | 230.459074 | 622.797103 | 85  | 3  |
| 286 | 46  | 583.153428 | 716.440406 | 766.017795 | 1158.3822  | 82  | 9  |
| 118 | 0   | 323.450912 | 483.556207 | 49.526505  | 152.66007  | 16  | 0  |
| 110 | 0   | 516.754853 | 615.506442 | 152.182131 | 514.079903 | 17  | 0  |
| 320 | 35  | 648.863722 | 789.484928 | 204.303552 | 577.115057 | 101 | 11 |
| 309 | 52  | 562.847898 | 692.255785 | 739.528071 | 1126.48188 | 83  | 9  |
| 118 | 0   | 323.450912 | 483.556207 | 49.526505  | 152.66007  | 16  | 0  |
| 110 | 7   | 516.754853 | 615.506442 | 152.182131 | 514.079903 | 17  | 1  |
| 320 | 56  | 648.863722 | 789.484928 | 204.303552 | 577.115057 | 101 | 19 |
| 309 | 114 | 562.847898 | 692.255785 | 739.528071 | 1126.48188 | 83  | 31 |
| 22  | 2   | 275.462116 | 543.534195 | 135.662675 | 574.461649 | 3   | 1  |
| 3   | 0   | 746.789472 | 818.966824 | 1.588946   | 2.752136   | 2   | 0  |
| 2   | 0   | 234.855607 | 110.984265 | 0          | 0          | 1   | 0  |
| 28  | 0   | 185.772756 | 158.890217 | 18.560739  | 51.718137  | 4   | 0  |
| 41  | 6   | 204.691213 | 145.951059 | 19.864448  | 48.986631  | 10  | 1  |

AnnotatedResults

|     |    |            |            |            |            |     |    |
|-----|----|------------|------------|------------|------------|-----|----|
| 33  | 0  | 297.59203  | 481.559633 | 125.331027 | 478.608629 | 2   | 0  |
| 5   | 0  | 512.357178 | 667.852775 | 0.953368   | 2.131795   | 1   | 0  |
| 0   | 0  |            |            |            |            | 0   | 0  |
| 31  | 0  | 184.039317 | 156.452556 | 18.323243  | 49.643561  | 1   | 0  |
| 49  | 0  | 365.266668 | 558.057286 | 38.139667  | 94.734359  | 5   | 0  |
| 33  | 0  | 297.59203  | 481.559633 | 125.331027 | 478.608629 | 2   | 0  |
| 5   | 0  | 512.357178 | 667.852775 | 0.953368   | 2.131795   | 1   | 0  |
| 0   | 0  |            |            |            |            | 0   | 0  |
| 31  | 0  | 184.039317 | 156.452556 | 18.323243  | 49.643561  | 1   | 0  |
| 49  | 0  | 365.266668 | 558.057286 | 38.139667  | 94.734359  | 5   | 0  |
| 51  | 0  | 196.487999 | 193.453728 | 20.448657  | 65.794005  | 2   | 0  |
| 21  | 0  | 718.042011 | 1055.02246 | 7.061844   | 18.112396  | 6   | 0  |
| 10  | 0  | 415.219592 | 540.448405 | 32.45269   | 98.104506  | 1   | 0  |
| 34  | 0  | 220.801388 | 191.554778 | 56.076203  | 135.95698  | 3   | 0  |
| 56  | 0  | 395.14793  | 569.222432 | 48.879562  | 129.686563 | 7   | 0  |
| 67  | 0  | 223.864526 | 282.186826 | 38.873261  | 157.559986 | 3   | 0  |
| 34  | 0  | 725.856011 | 985.157015 | 91.833248  | 357.964642 | 11  | 0  |
| 20  | 0  | 312.246642 | 402.543904 | 21.280388  | 71.932885  | 1   | 0  |
| 37  | 0  | 236.582119 | 214.233179 | 61.856169  | 178.927778 | 3   | 0  |
| 78  | 0  | 355.555908 | 544.706868 | 43.41851   | 118.666174 | 8   | 0  |
| 67  | 0  | 223.864526 | 282.186826 | 38.873261  | 157.559986 | 3   | 0  |
| 34  | 0  | 725.856011 | 985.157015 | 91.833248  | 357.964642 | 11  | 0  |
| 20  | 0  | 312.246642 | 402.543904 | 21.280388  | 71.932885  | 1   | 0  |
| 37  | 0  | 236.582119 | 214.233179 | 61.856169  | 178.927778 | 3   | 0  |
| 78  | 0  | 355.555908 | 544.706868 | 43.41851   | 118.666174 | 8   | 0  |
| 112 | 19 | 302.5327   | 387.318616 | 13.075146  | 68.35941   | 31  | 5  |
| 29  | 10 | 311.390147 | 171.865309 | 68.941868  | 364.802337 | 14  | 4  |
| 135 | 0  | 273.761878 | 375.837442 | 16.897082  | 90.243825  | 12  | 0  |
| 57  | 0  | 394.167716 | 342.337284 | 226.107585 | 660.040133 | 7   | 0  |
| 135 | 0  | 273.761878 | 375.837442 | 16.897082  | 90.243825  | 12  | 0  |
| 57  | 6  | 394.167716 | 342.337284 | 226.107585 | 660.040133 | 7   | 3  |
| 148 | 0  | 241.339759 | 265.084629 | 19.355274  | 113.091312 | 11  | 0  |
| 54  | 0  | 356.99989  | 208.667826 | 147.825609 | 589.606778 | 6   | 0  |
| 167 | 0  | 242.499798 | 253.708923 | 16.753231  | 107.845068 | 13  | 0  |
| 73  | 0  | 341.048754 | 188.545051 | 110.434655 | 513.739464 | 5   | 0  |
| 167 | 0  | 242.499798 | 253.708923 | 16.753231  | 107.845068 | 13  | 0  |
| 73  | 0  | 341.048754 | 188.545051 | 110.434655 | 513.739464 | 5   | 0  |
| 197 | 98 | 347.148644 | 526.692136 | 128.510406 | 444.554395 | 60  | 29 |
| 46  | 4  | 391.638062 | 308.405531 | 43.94331   | 196.800462 | 23  | 1  |
| 7   | 0  | 249.535506 | 172.897133 | 2.68791    | 4.612713   | 2   | 0  |
| 1   | 0  | 57.2       |            | 0          |            | 0   | 0  |
| 149 | 63 | 642.647177 | 828.543917 | 249.162229 | 624.502433 | 109 | 49 |
| 208 | 34 | 351.17677  | 527.203216 | 124.623956 | 444.47796  | 15  | 0  |
| 60  | 0  | 419.941573 | 327.289434 | 42.828632  | 185.384084 | 10  | 0  |
| 16  | 0  | 231.791956 | 147.875495 | 6.247216   | 20.31833   | 0   | 0  |
| 1   | 0  | 62.857143  |            | 0          |            | 0   | 0  |
| 243 | 51 | 616.3227   | 709.297632 | 221.399266 | 590.621414 | 74  | 9  |
| 208 | 50 | 351.17677  | 527.203216 | 124.623956 | 444.47796  | 15  | 1  |
| 60  | 0  | 419.941573 | 327.289434 | 42.828632  | 185.384084 | 10  | 0  |
| 16  | 0  | 231.791956 | 147.875495 | 6.247216   | 20.31833   | 0   | 0  |
| 1   | 0  | 62.857143  |            | 0          |            | 0   | 0  |
| 243 | 63 | 616.3227   | 709.297632 | 221.399266 | 590.621414 | 74  | 13 |
| 232 | 24 | 353.960183 | 613.297442 | 130.621269 | 437.372425 | 16  | 0  |
| 77  | 0  | 454.009115 | 531.742627 | 46.471021  | 140.334883 | 14  | 0  |
| 24  | 0  | 247.56243  | 187.88228  | 3.423078   | 14.754773  | 2   | 0  |
| 6   | 0  | 117.59891  | 62.102781  | 0          | 0          | 0   | 0  |
| 125 | 0  | 672.633833 | 978.239249 | 164.334883 | 527.015629 | 40  | 0  |
| 271 | 43 | 368.078526 | 661.625713 | 122.806499 | 419.602367 | 21  | 0  |

AnnotatedResults

|     |    |            |            |            |            |    |    |
|-----|----|------------|------------|------------|------------|----|----|
| 99  | 0  | 418.293603 | 494.530894 | 39.947944  | 127.719765 | 16 | 0  |
| 37  | 0  | 233.046648 | 177.725244 | 3.866403   | 15.296752  | 2  | 0  |
| 9   | 0  | 120.967006 | 61.359368  | 0.575139   | 1.725417   | 0  | 0  |
| 180 | 0  | 585.165008 | 850.671766 | 153.300108 | 515.209039 | 43 | 0  |
| 271 | 43 | 368.078526 | 661.625713 | 122.806499 | 419.602367 | 21 | 0  |
| 99  | 0  | 418.293603 | 494.530894 | 39.947944  | 127.719765 | 16 | 0  |
| 37  | 0  | 233.046648 | 177.725244 | 3.866403   | 15.296752  | 2  | 0  |
| 9   | 0  | 120.967006 | 61.359368  | 0.575139   | 1.725417   | 0  | 0  |
| 180 | 31 | 585.165008 | 850.671766 | 153.300108 | 515.209039 | 43 | 7  |
| 145 | 41 | 355.249    | 310.722    | 144.395    | 568.965    | 64 | 25 |
| 19  | 0  | 262.053413 | 226.092163 | 7.928275   | 31.7137    | 6  | 0  |
| 31  | 4  | 212.204465 | 200.32181  | 14.905754  | 53.675852  | 7  | 1  |
| 158 | 0  | 352.965422 | 305.180921 | 147.026831 | 553.96102  | 21 | 0  |
| 25  | 0  | 240.892022 | 211.806755 | 6.034509   | 27.67943   | 3  | 0  |
| 36  | 0  | 227.088345 | 206.620732 | 13.162442  | 49.743876  | 2  | 0  |
| 158 | 18 | 352.965422 | 305.180921 | 147.026831 | 553.96102  | 21 | 5  |
| 25  | 0  | 240.892022 | 211.806755 | 6.034509   | 27.67943   | 3  | 0  |
| 36  | 0  | 227.088345 | 206.620732 | 13.162442  | 49.743876  | 2  | 0  |
| 205 | 11 | 377.16119  | 282.365728 | 212.828219 | 680.28471  | 32 | 7  |
| 33  | 0  | 226.597168 | 199.724609 | 21.353383  | 85.459849  | 3  | 0  |
| 34  | 0  | 214.232907 | 196.484129 | 3.662679   | 12.089804  | 2  | 0  |
| 235 | 11 | 367.556901 | 279.316253 | 196.873519 | 651.807756 | 35 | 7  |
| 56  | 0  | 287.201082 | 469.258581 | 17.947029  | 68.40155   | 6  | 0  |
| 73  | 0  | 230.50233  | 207.680437 | 4.879605   | 26.325939  | 4  | 0  |
| 235 | 23 | 367.556901 | 279.316253 | 196.873519 | 651.807756 | 35 | 9  |
| 56  | 0  | 287.201082 | 469.258581 | 17.947029  | 68.40155   | 6  | 0  |
| 73  | 0  | 230.50233  | 207.680437 | 4.879605   | 26.325939  | 4  | 0  |
| 33  | 4  | 332.371688 | 470.583938 | 54.69853   | 149.174808 | 11 | 2  |
| 32  | 2  | 228.061178 | 337.198636 | 59.666805  | 330.366276 | 3  | 0  |
| 121 | 51 | 371.138929 | 520.098239 | 348.159757 | 520.87524  | 45 | 20 |
| 32  | 0  | 357.497509 | 498.220865 | 67.302275  | 160.175943 | 5  | 0  |
| 39  | 0  | 235.133492 | 331.189382 | 57.034775  | 300.340161 | 3  | 0  |
| 134 | 32 | 350.639461 | 498.339539 | 353.743066 | 515.391195 | 16 | 5  |
| 32  | 0  | 357.497509 | 498.220865 | 67.302275  | 160.175943 | 5  | 0  |
| 39  | 0  | 235.133492 | 331.189382 | 57.034775  | 300.340161 | 3  | 0  |
| 134 | 47 | 350.639461 | 498.339539 | 353.743066 | 515.391195 | 16 | 11 |
| 61  | 0  | 274.626977 | 361.301607 | 52.838976  | 140.985356 | 5  | 0  |
| 20  | 0  | 318.371978 | 577.249943 | 9.110206   | 29.561799  | 1  | 0  |
| 120 | 23 | 284.386672 | 331.744612 | 292.518972 | 527.195808 | 11 | 1  |
| 89  | 0  | 315.001958 | 528.556482 | 47.85031   | 124.596082 | 8  | 0  |
| 47  | 0  | 254.931817 | 418.267219 | 24.949533  | 58.210932  | 3  | 0  |
| 151 | 21 | 299.95634  | 363.004376 | 246.633219 | 487.251252 | 16 | 1  |
| 89  | 0  | 315.001958 | 528.556482 | 47.85031   | 124.596082 | 8  | 0  |
| 47  | 0  | 254.931817 | 418.267219 | 24.949533  | 58.210932  | 3  | 0  |
| 151 | 21 | 299.95634  | 363.004376 | 246.633219 | 487.251252 | 16 | 1  |
| 13  | 0  | 291.77403  | 415.598401 | 79.485884  | 218.903366 | 2  | 0  |
| 11  | 2  | 933.278293 | 541.927706 | 64.26961   | 136.535556 | 10 | 2  |
| 1   | 0  | 255.111111 |            | 0          |            | 0  | 0  |
| 5   | 0  | 185.117391 | 97.944001  | 0          | 0          | 1  | 0  |
| 17  | 2  | 308.23908  | 426.406839 | 1.018576   | 4.199696   | 5  | 1  |
| 14  | 0  | 317.419457 | 398.608161 | 67.711375  | 190.494433 | 2  | 0  |
| 31  | 0  | 857.400764 | 858.259214 | 22.597007  | 75.404869  | 13 | 0  |
| 5   | 0  | 196.525708 | 55.815321  | 0          | 0          | 0  | 0  |
| 12  | 0  | 190.71105  | 109.182968 | 0          | 0          | 0  | 0  |
| 20  | 0  | 400.880574 | 486.3564   | 59.019183  | 200.255353 | 5  | 0  |
| 14  | 0  | 317.419457 | 398.608161 | 67.711375  | 190.494433 | 2  | 0  |
| 31  | 0  | 857.400764 | 858.259214 | 22.597007  | 75.404869  | 13 | 0  |
| 5   | 0  | 196.525708 | 55.815321  | 0          | 0          | 0  | 0  |

AnnotatedResults

|     |    |            |            |            |            |     |    |
|-----|----|------------|------------|------------|------------|-----|----|
| 12  | 0  | 190.71105  | 109.182968 | 0          | 0          | 0   | 0  |
| 20  | 0  | 400.880574 | 486.3564   | 59.019183  | 200.255353 | 5   | 0  |
| 15  | 0  | 385.108473 | 772.874998 | 11.75037   | 45.508989  | 1   | 0  |
| 40  | 0  | 1211.92086 | 671.379138 | 23.706574  | 62.026006  | 30  | 0  |
| 3   | 0  | 163.761712 | 68.098953  | 5.102881   | 8.838449   | 0   | 0  |
| 37  | 0  | 414.765134 | 685.291441 | 110.78655  | 302.220827 | 4   | 0  |
| 28  | 0  | 346.618912 | 391.092624 | 89.584645  | 259.650483 | 5   | 0  |
| 23  | 0  | 345.594238 | 636.743416 | 7.663285   | 36.751824  | 2   | 0  |
| 133 | 0  | 1149.94076 | 602.083935 | 15.899387  | 48.715207  | 107 | 0  |
| 5   | 0  | 336.068915 | 385.193742 | 125.699634 | 273.519201 | 1   | 0  |
| 67  | 0  | 322.593258 | 522.742673 | 73.325681  | 235.158758 | 5   | 0  |
| 38  | 0  | 303.770793 | 348.390401 | 68.694816  | 230.262778 | 5   | 0  |
| 23  | 0  | 345.594238 | 636.743416 | 7.663285   | 36.751824  | 2   | 0  |
| 133 | 0  | 1149.94076 | 602.083935 | 15.899387  | 48.715207  | 107 | 0  |
| 5   | 0  | 336.068915 | 385.193742 | 125.699634 | 273.519201 | 1   | 0  |
| 67  | 0  | 322.593258 | 522.742673 | 73.325681  | 235.158758 | 5   | 0  |
| 38  | 0  | 303.770793 | 348.390401 | 68.694816  | 230.262778 | 5   | 0  |
| 10  | 0  | 795.12104  | 1401.05046 | 102.507935 | 284.627622 | 3   | 0  |
| 49  | 2  | 324.780443 | 621.046745 | 32.21598   | 94.24251   | 11  | 0  |
| 12  | 0  | 658.291164 | 1274.06206 | 75.687956  | 262.190771 | 2   | 0  |
| 60  | 0  | 305.811579 | 573.805952 | 47.98507   | 123.8978   | 5   | 0  |
| 12  | 0  | 658.291164 | 1274.06206 | 75.687956  | 262.190771 | 2   | 0  |
| 60  | 0  | 305.811579 | 573.805952 | 47.98507   | 123.8978   | 5   | 0  |
| 15  | 0  | 607.154715 | 1080.28398 | 251.913341 | 501.763332 | 3   | 0  |
| 50  | 0  | 241.87141  | 386.366582 | 53.884948  | 157.507511 | 4   | 0  |
| 27  | 0  | 428.679621 | 822.927034 | 143.869181 | 388.376531 | 3   | 0  |
| 75  | 0  | 241.024886 | 328.287753 | 44.219354  | 135.051321 | 5   | 0  |
| 27  | 0  | 428.679621 | 822.927034 | 143.869181 | 388.376531 | 3   | 0  |
| 75  | 0  | 241.024886 | 328.287753 | 44.219354  | 135.051321 | 5   | 0  |
| 49  | 16 | 354.208232 | 367.5687   | 36.626216  | 116.196461 | 21  | 7  |
| 41  | 9  | 767.601679 | 1203.90533 | 216.574061 | 516.885679 | 19  | 5  |
| 60  | 9  | 459.321    | 446.276359 | 143.639169 | 451.387825 | 38  | 9  |
| 83  | 35 | 490.825913 | 727.533892 | 378.404171 | 718.191381 | 44  | 21 |
| 59  | 11 | 340.398768 | 246.8464   | 119.8686   | 501.548781 | 4   | 0  |
| 63  | 0  | 649.179705 | 1058.11064 | 167.779277 | 459.036399 | 10  | 0  |
| 71  | 0  | 436.039123 | 455.607239 | 154.210668 | 447.96454  | 10  | 0  |
| 114 | 0  | 520.146344 | 786.675609 | 440.346948 | 892.256406 | 18  | 0  |
| 59  | 11 | 340.398768 | 246.8464   | 119.8686   | 501.548781 | 4   | 0  |
| 63  | 6  | 649.179705 | 1058.11064 | 167.779277 | 459.036399 | 10  | 0  |
| 71  | 0  | 436.039123 | 455.607239 | 154.210668 | 447.96454  | 10  | 0  |
| 114 | 6  | 520.146344 | 786.675609 | 440.346948 | 892.256406 | 18  | 6  |
| 69  | 12 | 441.727224 | 614.624212 | 265.605932 | 687.25677  | 7   | 0  |
| 66  | 0  | 598.213377 | 944.357255 | 135.269831 | 383.359505 | 13  | 0  |
| 85  | 0  | 573.90723  | 742.19708  | 166.991852 | 541.820161 | 19  | 0  |
| 88  | 0  | 556.047621 | 668.563024 | 546.49182  | 1028.33329 | 18  | 0  |
| 91  | 12 | 420.361967 | 573.821196 | 208.400527 | 607.879246 | 11  | 0  |
| 80  | 0  | 593.244399 | 963.948667 | 134.054333 | 372.905899 | 14  | 0  |
| 105 | 0  | 511.083245 | 676.847618 | 116.109042 | 443.790106 | 19  | 0  |
| 107 | 0  | 491.056467 | 614.103676 | 466.187971 | 947.517021 | 20  | 0  |
| 91  | 12 | 420.361967 | 573.821196 | 208.400527 | 607.879246 | 11  | 0  |
| 80  | 6  | 593.244399 | 963.948667 | 134.054333 | 372.905899 | 14  | 0  |
| 105 | 0  | 511.083245 | 676.847618 | 116.109042 | 443.790106 | 19  | 0  |
| 107 | 7  | 491.056467 | 614.103676 | 466.187971 | 947.517021 | 20  | 7  |
| 11  | 0  | 305.335674 | 338.595958 | 17.099134  | 38.667602  | 3   | 0  |
| 1   | 0  | 117.391304 |            | 0          |            | 0   | 0  |
| 21  | 0  | 313.987951 | 308.247184 | 23.29531   | 89.792287  | 3   | 0  |
| 2   | 0  | 121.852941 | 14.350108  | 0          | 0          | 0   | 0  |
| 21  | 0  | 313.987951 | 308.247184 | 23.29531   | 89.792287  | 3   | 0  |

AnnotatedResults

|     |    |            |            |            |            |     |    |
|-----|----|------------|------------|------------|------------|-----|----|
| 2   | 0  | 121.852941 | 14.350108  | 0          | 0          | 0   | 0  |
| 10  | 0  | 520.524916 | 765.261045 | 50.348799  | 158.962909 | 2   | 0  |
| 2   | 0  | 119.643728 | 74.860052  | 0          | 0          | 0   | 0  |
| 22  | 0  | 459.781347 | 663.898994 | 37.364572  | 110.746262 | 4   | 0  |
| 8   | 0  | 452.357199 | 992.097561 | 18.079861  | 51.13757   | 1   | 0  |
| 22  | 0  | 459.781347 | 663.898994 | 37.364572  | 110.746262 | 4   | 0  |
| 8   | 0  | 452.357199 | 992.097561 | 18.079861  | 51.13757   | 1   | 0  |
| 56  | 7  | 207.907593 | 262.356781 | 20.746099  | 71.723764  | 11  | 0  |
| 54  | 11 | 243.280175 | 290.603304 | 58.51327   | 143.44297  | 13  | 2  |
| 170 | 9  | 228.864165 | 152.116055 | 70.601792  | 285.545651 | 37  | 7  |
| 55  | 0  | 200.883858 | 256.45127  | 25.205701  | 82.413342  | 2   | 0  |
| 75  | 0  | 206.093372 | 231.748378 | 36.498425  | 116.24776  | 4   | 0  |
| 223 | 0  | 262.56143  | 239.017295 | 80.06109   | 275.56871  | 15  | 0  |
| 55  | 0  | 200.883858 | 256.45127  | 25.205701  | 82.413342  | 2   | 0  |
| 75  | 0  | 206.093372 | 231.748378 | 36.498425  | 116.24776  | 4   | 0  |
| 223 | 6  | 262.56143  | 239.017295 | 80.06109   | 275.56871  | 15  | 0  |
| 68  | 0  | 207.041963 | 230.092843 | 33.138121  | 106.14693  | 4   | 0  |
| 47  | 0  | 228.171334 | 290.565338 | 44.949919  | 168.132583 | 3   | 0  |
| 235 | 0  | 214.909171 | 160.152742 | 25.452705  | 182.477461 | 7   | 0  |
| 104 | 0  | 232.692205 | 281.399296 | 31.165143  | 99.362241  | 7   | 0  |
| 74  | 0  | 302.632228 | 493.269335 | 61.391542  | 219.060586 | 7   | 0  |
| 392 | 0  | 240.098061 | 208.553481 | 27.322447  | 170.939536 | 26  | 0  |
| 104 | 7  | 232.692205 | 281.399296 | 31.165143  | 99.362241  | 7   | 1  |
| 74  | 0  | 302.632228 | 493.269335 | 61.391542  | 219.060586 | 7   | 0  |
| 392 | 12 | 240.098061 | 208.553481 | 27.322447  | 170.939536 | 26  | 0  |
| 9   | 2  | 326.268736 | 173.043681 | 16.800377  | 50.40113   | 4   | 0  |
| 5   | 0  | 1291.5011  | 2263.80023 | 0.227664   | 0.509072   | 3   | 0  |
| 31  | 2  | 602.709185 | 880.012314 | 408.247448 | 830.204913 | 18  | 1  |
| 170 | 24 | 944.815892 | 874.773036 | 187.513171 | 494.601436 | 133 | 20 |
| 5   | 0  | 319.209178 | 189.805254 | 0          | 0          | 0   | 0  |
| 15  | 0  | 629.449501 | 1307.16353 | 247.798071 | 661.865225 | 1   | 0  |
| 34  | 0  | 383.046208 | 231.086711 | 249.049926 | 659.043807 | 6   | 0  |
| 176 | 0  | 886.061285 | 858.377726 | 269.74571  | 689.921709 | 86  | 0  |
| 5   | 0  | 319.209178 | 189.805254 | 0          | 0          | 0   | 0  |
| 15  | 0  | 629.449501 | 1307.16353 | 247.798071 | 661.865225 | 1   | 0  |
| 34  | 0  | 383.046208 | 231.086711 | 249.049926 | 659.043807 | 6   | 0  |
| 176 | 0  | 886.061285 | 858.377726 | 269.74571  | 689.921709 | 86  | 0  |
| 25  | 0  | 461.996075 | 575.86581  | 78.771649  | 328.527919 | 4   | 0  |
| 18  | 0  | 761.50511  | 1257.73602 | 253.778282 | 726.408862 | 3   | 0  |
| 3   | 0  | 266.835862 | 194.266667 | 3.103175   | 5.374856   | 0   | 0  |
| 142 | 0  | 1212.83582 | 919.807562 | 148.89947  | 442.540965 | 99  | 0  |
| 36  | 0  | 414.775101 | 492.930185 | 111.981897 | 364.804634 | 5   | 0  |
| 45  | 0  | 549.002672 | 826.325468 | 190.894859 | 580.625848 | 7   | 0  |
| 17  | 0  | 528.333266 | 980.532214 | 565.771268 | 965.580265 | 2   | 0  |
| 243 | 0  | 1142.70512 | 920.375785 | 135.44903  | 484.648788 | 156 | 0  |
| 36  | 0  | 414.775101 | 492.930185 | 111.981897 | 364.804634 | 5   | 0  |
| 45  | 0  | 549.002672 | 826.325468 | 190.894859 | 580.625848 | 7   | 0  |
| 17  | 0  | 528.333266 | 980.532214 | 565.771268 | 965.580265 | 2   | 0  |
| 243 | 0  | 1142.70512 | 920.375785 | 135.44903  | 484.648788 | 156 | 0  |
| 25  | 6  | 351.853013 | 619.087914 | 68.680411  | 252.665516 | 7   | 1  |
| 101 | 10 | 527.03731  | 532.310222 | 18.850444  | 77.789106  | 51  | 7  |
| 35  | 3  | 547.643712 | 438.901652 | 8.503625   | 26.177224  | 22  | 2  |
| 3   | 2  | 558.354557 | 363.465459 | 24.033813  | 21.09022   | 2   | 2  |
| 19  | 0  | 369.889206 | 291.850785 | 4.415243   | 12.042501  | 9   | 0  |
| 34  | 4  | 333.133    | 192.436    | 63.6268    | 263.489    | 18  | 4  |
| 7   | 0  | 172.551467 | 77.00904   | 0          | 0          | 0   | 0  |
| 109 | 22 | 230.870789 | 348.119823 | 10.535256  | 78.694296  | 23  | 3  |
| 50  | 0  | 290.450574 | 435.20834  | 132.342254 | 345.364614 | 4   | 0  |

AnnotatedResults

|     |    |            |            |            |            |     |   |
|-----|----|------------|------------|------------|------------|-----|---|
| 100 | 0  | 573.949137 | 652.631995 | 18.865244  | 78.188436  | 24  | 0 |
| 38  | 0  | 584.463254 | 470.281194 | 17.335133  | 62.162009  | 13  | 0 |
| 3   | 0  | 558.354557 | 363.465459 | 24.033813  | 21.09022   | 1   | 0 |
| 32  | 0  | 463.035174 | 458.268469 | 211.695182 | 408.089847 | 4   | 0 |
| 36  | 0  | 338.702196 | 230.186908 | 70.065925  | 297.660881 | 4   | 0 |
| 22  | 0  | 210.14636  | 201.527354 | 7.887872   | 30.80336   | 1   | 0 |
| 108 | 0  | 250.390678 | 378.157929 | 20.080191  | 121.433863 | 4   | 0 |
| 50  | 0  | 290.450574 | 435.20834  | 132.342254 | 345.364614 | 4   | 0 |
| 100 | 0  | 573.949137 | 652.631995 | 18.865244  | 78.188436  | 24  | 0 |
| 38  | 0  | 584.463254 | 470.281194 | 17.335133  | 62.162009  | 13  | 0 |
| 3   | 0  | 558.354557 | 363.465459 | 24.033813  | 21.09022   | 1   | 0 |
| 32  | 0  | 463.035174 | 458.268469 | 211.695182 | 408.089847 | 4   | 0 |
| 36  | 0  | 338.702196 | 230.186908 | 70.065925  | 297.660881 | 4   | 0 |
| 22  | 0  | 210.14636  | 201.527354 | 7.887872   | 30.80336   | 1   | 0 |
| 108 | 0  | 250.390678 | 378.157929 | 20.080191  | 121.433863 | 4   | 0 |
| 15  | 0  | 303.19378  | 305.736086 | 275.224542 | 552.302798 | 3   | 0 |
| 91  | 0  | 1405.46198 | 1007.29655 | 32.200618  | 59.135874  | 65  | 0 |
| 21  | 0  | 669.48862  | 477.907554 | 71.195074  | 287.530801 | 11  | 0 |
| 8   | 0  | 849.374175 | 1192.95823 | 0.074      | 0.209304   | 3   | 0 |
| 16  | 0  | 473.253933 | 367.923869 | 41.116642  | 105.890604 | 4   | 0 |
| 35  | 0  | 493.216062 | 473.635965 | 26.822914  | 102.422185 | 9   | 0 |
| 15  | 0  | 404.843082 | 848.009178 | 48.316838  | 121.727924 | 1   | 0 |
| 102 | 0  | 250.781709 | 458.312494 | 15.258387  | 91.887438  | 6   | 0 |
| 36  | 0  | 261.211207 | 295.618548 | 203.699105 | 419.696005 | 4   | 0 |
| 263 | 0  | 1413.55093 | 890.97221  | 30.522     | 68.103353  | 209 | 0 |
| 53  | 0  | 585.089634 | 464.26434  | 45.760975  | 194.954787 | 20  | 0 |
| 17  | 0  | 502.165482 | 876.723084 | 5.293791   | 18.024255  | 4   | 0 |
| 50  | 0  | 391.156857 | 361.582117 | 32.000324  | 111.717309 | 9   | 0 |
| 54  | 0  | 424.626737 | 406.964953 | 21.594358  | 85.973457  | 10  | 0 |
| 27  | 0  | 390.306224 | 679.123238 | 26.890653  | 89.510196  | 3   | 0 |
| 121 | 0  | 234.085054 | 424.697455 | 15.112633  | 85.430649  | 7   | 0 |
| 36  | 0  | 261.211207 | 295.618548 | 203.699105 | 419.696005 | 4   | 0 |
| 263 | 0  | 1413.55093 | 890.97221  | 30.522     | 68.103353  | 209 | 0 |
| 53  | 0  | 585.089634 | 464.26434  | 45.760975  | 194.954787 | 20  | 0 |
| 17  | 0  | 502.165482 | 876.723084 | 5.293791   | 18.024255  | 4   | 0 |
| 50  | 0  | 391.156857 | 361.582117 | 32.000324  | 111.717309 | 9   | 0 |
| 54  | 0  | 424.626737 | 406.964953 | 21.594358  | 85.973457  | 10  | 0 |
| 27  | 0  | 390.306224 | 679.123238 | 26.890653  | 89.510196  | 3   | 0 |
| 121 | 0  | 234.085054 | 424.697455 | 15.112633  | 85.430649  | 7   | 0 |
| 3   | 0  | 2709.2938  | 2177.90114 | 32.861406  | 48.941753  | 2   | 0 |
| 7   | 0  | 847.378588 | 1387.18095 | 613.038483 | 1091.71238 | 3   | 0 |
| 13  | 0  | 324.42733  | 682.643535 | 0          | 0          | 1   | 0 |
| 3   | 0  | 2709.2938  | 2177.90114 | 32.861406  | 48.941753  | 2   | 0 |
| 14  | 0  | 925.884268 | 1359.79192 | 545.224648 | 840.290763 | 3   | 0 |
| 24  | 0  | 247.948719 | 506.788611 | 0.690311   | 3.381821   | 1   | 0 |
| 3   | 0  | 2709.2938  | 2177.90114 | 32.861406  | 48.941753  | 2   | 0 |
| 14  | 0  | 925.884268 | 1359.79192 | 545.224648 | 840.290763 | 3   | 0 |
| 24  | 0  | 247.948719 | 506.788611 | 0.690311   | 3.381821   | 1   | 0 |
| 7   | 0  | 383.166716 | 675.768502 | 3.838573   | 6.865193   | 1   | 0 |
| 28  | 0  | 512.858439 | 684.132144 | 420.265274 | 728.306314 | 7   | 0 |
| 13  | 0  | 232.723175 | 161.780872 | 0.521386   | 1.084901   | 1   | 0 |
| 10  | 0  | 320.973921 | 562.573747 | 2.687001   | 5.904123   | 1   | 0 |
| 41  | 0  | 417.380456 | 591.430199 | 291.073975 | 626.648184 | 7   | 0 |
| 23  | 0  | 218.956714 | 209.434922 | 1.932378   | 7.835096   | 2   | 0 |
| 10  | 0  | 320.973921 | 562.573747 | 2.687001   | 5.904123   | 1   | 0 |
| 41  | 6  | 417.380456 | 591.430199 | 291.073975 | 626.648184 | 7   | 0 |
| 23  | 0  | 218.956714 | 209.434922 | 1.932378   | 7.835096   | 2   | 0 |
| 119 | 30 | 245.304123 | 219.595355 | 13.589744  | 52.529471  | 34  | 8 |



AnnotatedResults

|     |    |            |            |            |            |     |    |
|-----|----|------------|------------|------------|------------|-----|----|
| 72  | 25 | 166.560521 | 132.165461 | 23.488226  | 63.828475  | 12  | 7  |
| 134 | 14 | 350.50701  | 451.100499 | 207.870223 | 492.606286 | 43  | 8  |
| 9   | 0  | 1034.80949 | 1611.068   | 859.834154 | 1705.39834 | 4   | 0  |
| 136 | 0  | 231.718207 | 218.176757 | 14.871373  | 56.891044  | 7   | 0  |
| 94  | 0  | 216.458943 | 480.29307  | 84.185028  | 471.965155 | 4   | 0  |
| 147 | 0  | 433.590412 | 598.113917 | 212.808617 | 493.957516 | 23  | 0  |
| 22  | 0  | 677.040777 | 1170.57064 | 535.027985 | 1230.40084 | 4   | 0  |
| 136 | 7  | 231.718207 | 218.176757 | 14.871373  | 56.891044  | 7   | 0  |
| 94  | 7  | 216.458943 | 480.29307  | 84.185028  | 471.965155 | 4   | 2  |
| 147 | 0  | 433.590412 | 598.113917 | 212.808617 | 493.957516 | 23  | 0  |
| 22  | 0  | 677.040777 | 1170.57064 | 535.027985 | 1230.40084 | 4   | 0  |
| 131 | 0  | 273.065923 | 420.890157 | 11.139363  | 39.294124  | 12  | 0  |
| 118 | 0  | 205.363935 | 243.72494  | 31.098742  | 82.207391  | 5   | 0  |
| 180 | 0  | 451.927121 | 685.564872 | 236.777676 | 587.473956 | 29  | 0  |
| 42  | 0  | 341.293967 | 647.510818 | 131.734611 | 635.028765 | 4   | 0  |
| 162 | 0  | 266.088211 | 395.522667 | 13.222364  | 44.976035  | 15  | 0  |
| 143 | 0  | 211.228588 | 291.048015 | 32.821179  | 95.190984  | 6   | 0  |
| 226 | 0  | 407.947696 | 581.981495 | 190.175443 | 525.111056 | 31  | 0  |
| 62  | 0  | 329.753095 | 561.35498  | 94.976268  | 523.796381 | 7   | 0  |
| 162 | 0  | 266.088211 | 395.522667 | 13.222364  | 44.976035  | 15  | 0  |
| 143 | 8  | 211.228588 | 291.048015 | 32.821179  | 95.190984  | 6   | 1  |
| 226 | 6  | 407.947696 | 581.981495 | 190.175443 | 525.111056 | 31  | 4  |
| 62  | 0  | 329.753095 | 561.35498  | 94.976268  | 523.796381 | 7   | 0  |
| 16  | 0  | 474.136011 | 789.546186 | 8.782411   | 23.132547  | 6   | 0  |
| 6   | 0  | 212.835555 | 128.917222 | 8.728869   | 21.381274  | 2   | 0  |
| 122 | 35 | 274.030475 | 381.523515 | 250.025859 | 642.476136 | 29  | 15 |
| 114 | 23 | 342.049208 | 723.63139  | 92.412969  | 226.353866 | 28  | 3  |
| 29  | 0  | 399.30179  | 597.336165 | 5.663274   | 20.955865  | 4   | 0  |
| 15  | 0  | 207.083318 | 100.293436 | 1.748938   | 5.929195   | 0   | 0  |
| 138 | 0  | 252.72636  | 324.168303 | 252.313706 | 607.303272 | 13  | 0  |
| 155 | 0  | 332.069826 | 743.549659 | 87.419949  | 220.867516 | 11  | 0  |
| 29  | 0  | 399.30179  | 597.336165 | 5.663274   | 20.955865  | 4   | 0  |
| 15  | 0  | 207.083318 | 100.293436 | 1.748938   | 5.929195   | 0   | 0  |
| 138 | 13 | 252.72636  | 324.168303 | 252.313706 | 607.303272 | 13  | 5  |
| 155 | 13 | 332.069826 | 743.549659 | 87.419949  | 220.867516 | 11  | 6  |
| 14  | 0  | 265.326433 | 250.061313 | 25.086062  | 54.827361  | 2   | 0  |
| 31  | 0  | 286.862249 | 537.046343 | 25.548724  | 51.479188  | 2   | 0  |
| 147 | 0  | 317.401544 | 592.476338 | 205.762698 | 602.080792 | 14  | 0  |
| 214 | 14 | 364.076372 | 848.047495 | 124.147982 | 331.410486 | 16  | 0  |
| 37  | 0  | 377.422273 | 458.114786 | 11.827993  | 35.230174  | 7   | 0  |
| 48  | 0  | 303.261777 | 472.186863 | 21.191749  | 49.6482    | 5   | 0  |
| 176 | 0  | 310.092494 | 551.959085 | 185.313773 | 571.050727 | 17  | 0  |
| 267 | 10 | 328.740151 | 755.191228 | 102.977919 | 295.799766 | 18  | 0  |
| 37  | 0  | 377.422273 | 458.114786 | 11.827993  | 35.230174  | 7   | 0  |
| 48  | 0  | 303.261777 | 472.186863 | 21.191749  | 49.6482    | 5   | 0  |
| 176 | 13 | 310.092494 | 551.959085 | 185.313773 | 571.050727 | 17  | 3  |
| 267 | 26 | 328.740151 | 755.191228 | 102.977919 | 295.799766 | 18  | 8  |
| 186 | 48 | 483.230479 | 594.094426 | 374.895052 | 855.935505 | 106 | 33 |
| 0   | 0  |            |            |            |            | 0   | 0  |
| 3   | 0  | 142.589271 | 48.402603  | 0          | 0          | 0   | 0  |
| 54  | 0  | 301.05968  | 511.536734 | 20.579566  | 109.278015 | 12  | 0  |
| 10  | 0  | 117.808575 | 107.712231 | 41.309927  | 111.894362 | 1   | 0  |
| 200 | 10 | 493.890296 | 603.108296 | 329.837267 | 744.434215 | 44  | 2  |
| 0   | 0  |            |            |            |            | 0   | 0  |
| 5   | 0  | 188.267082 | 90.655015  | 8.307692   | 18.576565  | 0   | 0  |
| 58  | 0  | 359.44951  | 680.62077  | 5.459581   | 25.83358   | 5   | 0  |
| 12  | 0  | 205.115756 | 226.112461 | 80.528955  | 176.366664 | 1   | 0  |
| 200 | 10 | 493.890296 | 603.108296 | 329.837267 | 744.434215 | 44  | 2  |

AnnotatedResults

|     |    |            |            |            |            |    |    |
|-----|----|------------|------------|------------|------------|----|----|
| 0   | 0  |            |            |            |            | 0  | 0  |
| 5   | 0  | 188.267082 | 90.655015  | 8.307692   | 18.576565  | 0  | 0  |
| 58  | 0  | 359.44951  | 680.62077  | 5.459581   | 25.83358   | 5  | 0  |
| 12  | 0  | 205.115756 | 226.112461 | 80.528955  | 176.366664 | 1  | 0  |
| 196 | 0  | 629.724528 | 776.685863 | 473.251027 | 974.633027 | 57 | 0  |
| 2   | 0  | 160.206023 | 29.170059  | 4.769167   | 6.26124    | 0  | 0  |
| 5   | 0  | 174.732298 | 86.991425  | 8.841826   | 17.543826  | 0  | 0  |
| 70  | 0  | 418.611637 | 716.062596 | 3.362062   | 14.980111  | 11 | 0  |
| 27  | 0  | 171.496281 | 197.587017 | 58.091182  | 193.877006 | 1  | 0  |
| 229 | 10 | 581.065651 | 708.905287 | 449.595553 | 966.104326 | 59 | 3  |
| 6   | 0  | 175.735733 | 45.789619  | 1.589722   | 3.729068   | 0  | 0  |
| 8   | 0  | 190.762809 | 125.339731 | 9.362207   | 16.312182  | 0  | 0  |
| 98  | 0  | 390.989686 | 660.760811 | 4.997203   | 21.735261  | 13 | 0  |
| 53  | 0  | 204.562817 | 239.179322 | 35.08927   | 143.460988 | 3  | 0  |
| 229 | 33 | 581.065651 | 708.905287 | 449.595553 | 966.104326 | 59 | 15 |
| 6   | 0  | 175.735733 | 45.789619  | 1.589722   | 3.729068   | 0  | 0  |
| 8   | 0  | 190.762809 | 125.339731 | 9.362207   | 16.312182  | 0  | 0  |
| 98  | 0  | 390.989686 | 660.760811 | 4.997203   | 21.735261  | 13 | 0  |
| 53  | 0  | 204.562817 | 239.179322 | 35.08927   | 143.460988 | 3  | 0  |
| 19  | 0  | 272.834441 | 281.82181  | 7.85981    | 23.737136  | 5  | 0  |
| 3   | 0  | 1594.63378 | 2493.80004 | 1.104892   | 1.913729   | 1  | 0  |
| 21  | 2  | 443.096369 | 339.358494 | 185.968165 | 594.095214 | 13 | 1  |
| 95  | 51 | 806.549319 | 982.594103 | 573.454047 | 760.480792 | 65 | 42 |
| 72  | 24 | 385.398039 | 771.60862  | 49.800997  | 171.769643 | 20 | 7  |
| 30  | 0  | 398.944087 | 494.069333 | 41.44145   | 93.99342   | 6  | 0  |
| 2   | 0  | 2327.24137 | 3035.90657 | 1.657338   | 2.34383    | 1  | 0  |
| 34  | 0  | 448.46352  | 289.69971  | 447.223498 | 791.259621 | 6  | 0  |
| 103 | 15 | 788.034987 | 896.682597 | 646.12876  | 805.093118 | 43 | 9  |
| 74  | 0  | 397.702806 | 798.032198 | 47.854066  | 177.176509 | 6  | 0  |
| 30  | 0  | 398.944087 | 494.069333 | 41.44145   | 93.99342   | 6  | 0  |
| 2   | 0  | 2327.24137 | 3035.90657 | 1.657338   | 2.34383    | 1  | 0  |
| 34  | 0  | 448.46352  | 289.69971  | 447.223498 | 791.259621 | 6  | 0  |
| 103 | 24 | 788.034987 | 896.682597 | 646.12876  | 805.093118 | 43 | 14 |
| 74  | 0  | 397.702806 | 798.032198 | 47.854066  | 177.176509 | 6  | 0  |
| 63  | 0  | 352.413735 | 606.56052  | 23.896117  | 86.898459  | 8  | 0  |
| 2   | 0  | 299.996337 | 198.79284  | 17.25      | 24.395184  | 0  | 0  |
| 13  | 0  | 768.992175 | 781.063048 | 979.950157 | 1190.76243 | 5  | 0  |
| 102 | 0  | 567.827612 | 628.418943 | 547.533319 | 897.581948 | 24 | 0  |
| 104 | 10 | 432.358123 | 793.804064 | 90.08784   | 259.953934 | 12 | 3  |
| 102 | 0  | 340.267133 | 601.929281 | 9.783521   | 33.649374  | 11 | 0  |
| 4   | 0  | 215.278585 | 158.995397 | 13.295168  | 16.655045  | 0  | 0  |
| 22  | 0  | 648.713407 | 629.997101 | 574.564463 | 1070.35757 | 5  | 0  |
| 125 | 0  | 531.934193 | 605.651335 | 455.819078 | 821.080321 | 27 | 0  |
| 119 | 10 | 436.378258 | 785.098584 | 97.034041  | 261.768285 | 13 | 3  |
| 102 | 0  | 340.267133 | 601.929281 | 9.783521   | 33.649374  | 11 | 0  |
| 4   | 0  | 215.278585 | 158.995397 | 13.295168  | 16.655045  | 0  | 0  |
| 22  | 0  | 648.713407 | 629.997101 | 574.564463 | 1070.35757 | 5  | 0  |
| 125 | 15 | 531.934193 | 605.651335 | 455.819078 | 821.080321 | 27 | 9  |
| 119 | 17 | 436.378258 | 785.098584 | 97.034041  | 261.768285 | 13 | 3  |
| 5   | 0  | 178.845182 | 177.696787 | 0          | 0          | 1  | 0  |
| 3   | 0  | 260.63396  | 233.954978 | 0          | 0          | 1  | 0  |
| 3   | 0  | 95.214448  | 28.051252  | 5.689655   | 9.854772   | 0  | 0  |
| 1   | 0  | 181.588235 |            | 0          |            | 0  | 0  |
| 0   | 0  |            |            |            |            | 0  | 0  |
| 24  | 0  | 278.817537 | 247.592536 | 9.530024   | 26.492614  | 3  | 0  |
| 8   | 0  | 159.808216 | 78.97002   | 0          | 0          | 0  | 0  |
| 6   | 0  | 193.874869 | 155.957762 | 12.294492  | 22.799491  | 0  | 0  |
| 1   | 0  | 181.588235 |            | 0          |            | 0  | 0  |

AnnotatedResults

|     |     |            |            |            |            |     |     |
|-----|-----|------------|------------|------------|------------|-----|-----|
| 0   | 0   |            |            |            |            | 0   | 0   |
| 24  | 0   | 278.817537 | 247.592536 | 9.530024   | 26.492614  | 3   | 0   |
| 8   | 0   | 159.808216 | 78.97002   | 0          | 0          | 0   | 0   |
| 6   | 0   | 193.874869 | 155.957762 | 12.294492  | 22.799491  | 0   | 0   |
| 1   | 0   | 181.588235 |            | 0          |            | 0   | 0   |
| 0   | 0   |            |            |            |            | 0   | 0   |
| 59  | 0   | 354.768705 | 512.150284 | 36.0292    | 119.22648  | 8   | 0   |
| 17  | 0   | 216.408588 | 165.567028 | 1.084561   | 2.653569   | 1   | 0   |
| 3   | 0   | 809.882185 | 606.49306  | 50.21676   | 75.282216  | 2   | 0   |
| 3   | 0   | 169.547207 | 84.611272  | 0          | 0          | 0   | 0   |
| 7   | 0   | 462.014455 | 246.928004 | 0.728571   | 1.927619   | 1   | 0   |
| 81  | 0   | 332.587742 | 504.006775 | 38.715     | 117.294834 | 10  | 0   |
| 34  | 0   | 264.156069 | 275.242644 | 0.622145   | 2.266703   | 3   | 0   |
| 6   | 0   | 637.436902 | 461.756135 | 24.127912  | 52.597373  | 3   | 0   |
| 4   | 0   | 166.980406 | 69.275288  | 0          | 0          | 0   | 0   |
| 16  | 0   | 285.380228 | 261.268413 | 42.055228  | 117.863371 | 1   | 0   |
| 81  | 0   | 332.587742 | 504.006775 | 38.715     | 117.294834 | 10  | 0   |
| 34  | 0   | 264.156069 | 275.242644 | 0.622145   | 2.266703   | 3   | 0   |
| 6   | 0   | 637.436902 | 461.756135 | 24.127912  | 52.597373  | 3   | 0   |
| 4   | 0   | 166.980406 | 69.275288  | 0          | 0          | 0   | 0   |
| 16  | 0   | 285.380228 | 261.268413 | 42.055228  | 117.863371 | 1   | 0   |
| 423 | 242 | 655.781003 | 915.177118 | 127.669253 | 390.434727 | 314 | 199 |
| 55  | 13  | 713.582969 | 715.490431 | 426.395362 | 719.423266 | 44  | 13  |
| 98  | 35  | 494.953719 | 563.704158 | 209.901977 | 596.793743 | 59  | 19  |
| 176 | 54  | 541.888181 | 561.00416  | 474.337192 | 958.452036 | 127 | 46  |
| 103 | 24  | 356.02265  | 630.131481 | 68.162717  | 133.848324 | 26  | 3   |
| 495 | 43  | 615.059939 | 839.124604 | 119.304862 | 372.942823 | 114 | 5   |
| 57  | 0   | 676.86456  | 744.718557 | 452.169627 | 781.705798 | 21  | 0   |
| 113 | 10  | 515.966269 | 586.824856 | 224.888398 | 600.891184 | 19  | 0   |
| 182 | 15  | 521.372677 | 539.865543 | 435.20722  | 923.40532  | 40  | 7   |
| 132 | 11  | 300.837767 | 442.074102 | 79.785095  | 145.091252 | 11  | 0   |
| 495 | 108 | 615.059939 | 839.124604 | 119.304862 | 372.942823 | 114 | 45  |
| 57  | 0   | 676.86456  | 744.718557 | 452.169627 | 781.705798 | 21  | 0   |
| 113 | 10  | 515.966269 | 586.824856 | 224.888398 | 600.891184 | 19  | 0   |
| 182 | 21  | 521.372677 | 539.865543 | 435.20722  | 923.40532  | 40  | 7   |
| 132 | 18  | 300.837767 | 442.074102 | 79.785095  | 145.091252 | 11  | 0   |
| 465 | 20  | 613.728923 | 876.716653 | 133.848372 | 440.732202 | 106 | 14  |
| 61  | 0   | 678.352122 | 772.060455 | 355.790095 | 644.56096  | 22  | 0   |
| 149 | 14  | 651.819488 | 1089.81522 | 277.259449 | 750.245003 | 34  | 2   |
| 203 | 17  | 530.365181 | 570.678686 | 454.012792 | 1026.04261 | 47  | 5   |
| 158 | 0   | 255.590968 | 366.159242 | 90.204412  | 187.302045 | 11  | 0   |
| 530 | 20  | 586.537989 | 852.952089 | 128.310395 | 428.473561 | 116 | 14  |
| 72  | 0   | 634.209572 | 721.366553 | 304.988086 | 602.287104 | 25  | 0   |
| 166 | 14  | 626.54521  | 1035.7079  | 256.755468 | 712.366176 | 39  | 2   |
| 247 | 17  | 535.322542 | 592.781193 | 391.312905 | 959.585371 | 57  | 5   |
| 192 | 0   | 256.567297 | 363.835267 | 83.256302  | 180.38139  | 14  | 0   |
| 530 | 101 | 586.537989 | 852.952089 | 128.310395 | 428.473561 | 116 | 46  |
| 72  | 12  | 634.209572 | 721.366553 | 304.988086 | 602.287104 | 25  | 4   |
| 166 | 32  | 626.54521  | 1035.7079  | 256.755468 | 712.366176 | 39  | 4   |
| 247 | 52  | 535.322542 | 592.781193 | 391.312905 | 959.585371 | 57  | 17  |
| 192 | 6   | 256.567297 | 363.835267 | 83.256302  | 180.38139  | 14  | 0   |
| 84  | 2   | 287.885195 | 334.300525 | 28.96529   | 166.572426 | 22  | 1   |
| 112 | 29  | 275.519642 | 389.145515 | 3.902453   | 19.075432  | 27  | 4   |
| 32  | 0   | 271.325551 | 286.419002 | 209.705558 | 458.994491 | 10  | 0   |
| 181 | 79  | 542.122446 | 868.703729 | 625.595165 | 1026.82081 | 94  | 57  |
| 10  | 0   | 331.212887 | 370.474803 | 123.042837 | 173.639593 | 4   | 0   |
| 82  | 0   | 309.083972 | 343.556076 | 30.208012  | 168.490495 | 11  | 0   |
| 118 | 0   | 291.19496  | 365.730403 | 12.403021  | 61.273407  | 12  | 0   |

AnnotatedResults

|     |    |            |            |            |            |    |    |
|-----|----|------------|------------|------------|------------|----|----|
| 38  | 0  | 308.005841 | 396.490303 | 151.131758 | 404.66226  | 4  | 0  |
| 206 | 29 | 578.711564 | 951.546951 | 616.769215 | 1031.28833 | 35 | 9  |
| 19  | 0  | 225.041676 | 224.711368 | 84.11742   | 154.306192 | 2  | 0  |
| 82  | 0  | 309.083972 | 343.556076 | 30.208012  | 168.490495 | 11 | 0  |
| 118 | 0  | 291.19496  | 365.730403 | 12.403021  | 61.273407  | 12 | 0  |
| 38  | 0  | 308.005841 | 396.490303 | 151.131758 | 404.66226  | 4  | 0  |
| 206 | 62 | 578.711564 | 951.546951 | 616.769215 | 1031.28833 | 35 | 20 |
| 19  | 0  | 225.041676 | 224.711368 | 84.11742   | 154.306192 | 2  | 0  |
| 95  | 0  | 359.005729 | 524.063448 | 33.917602  | 214.456833 | 14 | 0  |
| 145 | 0  | 255.135764 | 306.023967 | 14.429128  | 68.84856   | 7  | 0  |
| 42  | 0  | 250.317644 | 181.824025 | 155.710636 | 439.698894 | 2  | 0  |
| 240 | 36 | 536.213452 | 677.852751 | 735.696418 | 1243.69997 | 49 | 18 |
| 34  | 0  | 238.286387 | 244.706246 | 88.351699  | 221.432385 | 2  | 0  |
| 99  | 0  | 356.045239 | 522.830477 | 32.132615  | 204.780439 | 14 | 0  |
| 167 | 0  | 251.339743 | 303.394655 | 9.185243   | 47.701958  | 8  | 0  |
| 60  | 0  | 343.800321 | 638.207053 | 130.380404 | 403.291152 | 5  | 0  |
| 288 | 57 | 550.099786 | 743.3524   | 658.06354  | 1166.20986 | 56 | 23 |
| 43  | 0  | 259.468996 | 254.754078 | 72.380968  | 199.241008 | 4  | 0  |
| 99  | 0  | 356.045239 | 522.830477 | 32.132615  | 204.780439 | 14 | 0  |
| 167 | 8  | 251.339743 | 303.394655 | 9.185243   | 47.701958  | 8  | 0  |
| 60  | 0  | 343.800321 | 638.207053 | 130.380404 | 403.291152 | 5  | 0  |
| 288 | 86 | 550.099786 | 743.3524   | 658.06354  | 1166.20986 | 56 | 28 |
| 43  | 0  | 259.468996 | 254.754078 | 72.380968  | 199.241008 | 4  | 0  |
| 15  | 8  | 366.444184 | 534.444406 | 35.640801  | 113.494609 | 4  | 2  |
| 77  | 22 | 365.124906 | 391.610351 | 180.789922 | 463.731321 | 37 | 10 |
| 8   | 2  | 349.944336 | 422.357338 | 175.010805 | 217.820378 | 2  | 0  |
| 0   | 0  |            |            |            |            | 0  | 0  |
| 2   | 0  | 176.469208 | 91.903145  | 0          | 0          | 0  | 0  |
| 23  | 0  | 304.198887 | 466.233951 | 20.559783  | 97.752716  | 2  | 0  |
| 94  | 0  | 362.881922 | 346.339157 | 208.554865 | 551.473054 | 9  | 0  |
| 8   | 0  | 343.763951 | 426.09911  | 174.975026 | 218.040771 | 2  | 0  |
| 0   | 0  |            |            |            |            | 0  | 0  |
| 2   | 0  | 161.407027 | 85.17887   | 0          | 0          | 0  | 0  |
| 23  | 7  | 304.198887 | 466.233951 | 20.559783  | 97.752716  | 2  | 0  |
| 94  | 0  | 362.881922 | 346.339157 | 208.554865 | 551.473054 | 9  | 0  |
| 8   | 0  | 343.763951 | 426.09911  | 174.975026 | 218.040771 | 2  | 0  |
| 0   | 0  |            |            |            |            | 0  | 0  |
| 2   | 0  | 161.407027 | 85.17887   | 0          | 0          | 0  | 0  |
| 51  | 0  | 282.030194 | 535.488777 | 88.893922  | 334.002263 | 2  | 0  |
| 137 | 0  | 390.400225 | 547.732007 | 262.376964 | 700.057813 | 11 | 0  |
| 12  | 0  | 365.801571 | 592.868949 | 9.545216   | 18.391163  | 2  | 0  |
| 8   | 0  | 556.27881  | 742.929429 | 0          | 0          | 2  | 0  |
| 8   | 0  | 728.172194 | 977.564532 | 235.379464 | 597.166809 | 3  | 0  |
| 72  | 14 | 294.578418 | 477.468652 | 68.151356  | 283.863535 | 5  | 0  |
| 170 | 0  | 358.06198  | 501.253961 | 218.772219 | 639.405089 | 13 | 0  |
| 31  | 0  | 275.700128 | 385.985317 | 27.471138  | 87.529962  | 3  | 0  |
| 13  | 0  | 246.643072 | 317.115643 | 85.493269  | 222.963816 | 1  | 0  |
| 19  | 0  | 412.21302  | 671.955774 | 99.592368  | 390.947294 | 3  | 0  |
| 72  | 14 | 294.578418 | 477.468652 | 68.151356  | 283.863535 | 5  | 0  |
| 170 | 15 | 358.06198  | 501.253961 | 218.772219 | 639.405089 | 13 | 0  |
| 31  | 0  | 275.700128 | 385.985317 | 27.471138  | 87.529962  | 3  | 0  |
| 13  | 0  | 246.643072 | 317.115643 | 85.493269  | 222.963816 | 1  | 0  |
| 19  | 0  | 412.21302  | 671.955774 | 99.592368  | 390.947294 | 3  | 0  |
| 96  | 15 | 486.336742 | 602.787215 | 157.062216 | 414.092855 | 52 | 9  |
| 145 | 37 | 552.542891 | 658.86267  | 405.478815 | 855.719114 | 89 | 27 |
| 22  | 2  | 280.294681 | 179.089561 | 73.446383  | 230.858499 | 7  | 1  |
| 8   | 4  | 193.306299 | 131.519562 | 41.644241  | 52.979792  | 1  | 0  |
| 115 | 0  | 486.782284 | 579.163508 | 169.50397  | 471.115591 | 25 | 0  |

AnnotatedResults

|     |     |            |            |            |            |     |     |
|-----|-----|------------|------------|------------|------------|-----|-----|
| 164 | 0   | 567.769472 | 682.133311 | 387.467568 | 835.279516 | 39  | 0   |
| 28  | 0   | 225.832831 | 177.620777 | 67.508341  | 211.186671 | 1   | 0   |
| 12  | 0   | 520.977279 | 853.893591 | 79.694338  | 105.856355 | 2   | 0   |
| 115 | 0   | 486.782284 | 579.163508 | 169.50397  | 471.115591 | 25  | 0   |
| 164 | 9   | 567.769472 | 682.133311 | 387.467568 | 835.279516 | 39  | 9   |
| 28  | 8   | 225.832831 | 177.620777 | 67.508341  | 211.186671 | 1   | 1   |
| 12  | 0   | 520.977279 | 853.893591 | 79.694338  | 105.856355 | 2   | 0   |
| 125 | 0   | 653.074497 | 968.011788 | 238.408413 | 583.094668 | 24  | 0   |
| 126 | 0   | 467.722018 | 471.283962 | 493.41706  | 1091.98646 | 24  | 0   |
| 111 | 11  | 371.974744 | 728.859645 | 93.777315  | 242.345928 | 11  | 1   |
| 40  | 0   | 474.896903 | 949.846836 | 65.223153  | 226.68233  | 6   | 0   |
| 156 | 10  | 603.220719 | 907.921672 | 200.154971 | 531.802845 | 27  | 10  |
| 173 | 10  | 518.523117 | 615.373911 | 417.719129 | 992.734851 | 39  | 0   |
| 133 | 12  | 379.874243 | 746.152108 | 80.728503  | 227.214711 | 12  | 1   |
| 89  | 0   | 462.354324 | 935.623723 | 126.917577 | 261.103053 | 13  | 0   |
| 156 | 10  | 603.220719 | 907.921672 | 200.154971 | 531.802845 | 27  | 10  |
| 173 | 16  | 518.523117 | 615.373911 | 417.719129 | 992.734851 | 39  | 6   |
| 133 | 18  | 379.874243 | 746.152108 | 80.728503  | 227.214711 | 12  | 1   |
| 89  | 0   | 462.354324 | 935.623723 | 126.917577 | 261.103053 | 13  | 0   |
| 1   | 0   | 826.772727 |            | 414.978355 |            | 1   | 0   |
| 9   | 0   | 687.643567 | 1140.18699 | 0          | 0          | 3   | 0   |
| 164 | 85  | 561.57968  | 513.848001 | 298.887187 | 740.753157 | 125 | 73  |
| 161 | 70  | 685.916    | 717.612    | 441.633    | 760.061    | 119 | 59  |
| 1   | 0   | 826.772727 |            | 414.978355 |            | 1   | 0   |
| 23  | 0   | 437.418903 | 722.154211 | 10.12088   | 48.538037  | 2   | 0   |
| 199 | 0   | 536.685997 | 485.41399  | 283.228413 | 733.245087 | 53  | 0   |
| 173 | 19  | 699.500764 | 700.117592 | 450.432783 | 766.147441 | 62  | 18  |
| 1   | 0   | 826.772727 |            | 414.978355 |            | 1   | 0   |
| 23  | 0   | 437.418903 | 722.154211 | 10.12088   | 48.538037  | 2   | 0   |
| 199 | 26  | 536.685997 | 485.41399  | 283.228413 | 733.245087 | 53  | 14  |
| 173 | 26  | 699.500764 | 700.117592 | 450.432783 | 766.147441 | 62  | 25  |
| 5   | 0   | 267.375604 | 228.291387 | 92.483385  | 154.864925 | 1   | 0   |
| 17  | 0   | 568.404795 | 1083.68056 | 58.101053  | 149.836119 | 3   | 0   |
| 209 | 0   | 535.639766 | 501.97098  | 442.255646 | 997.91079  | 53  | 0   |
| 212 | 22  | 714.527176 | 785.875875 | 504.522381 | 923.383167 | 74  | 20  |
| 9   | 0   | 278.457825 | 206.075555 | 58.947221  | 117.177178 | 1   | 0   |
| 26  | 0   | 470.63536  | 888.900543 | 38.139051  | 123.093001 | 4   | 0   |
| 241 | 0   | 500.964622 | 480.224754 | 379.111589 | 939.188181 | 55  | 0   |
| 244 | 24  | 688.812914 | 785.714627 | 467.105317 | 907.699027 | 77  | 22  |
| 9   | 0   | 278.457825 | 206.075555 | 58.947221  | 117.177178 | 1   | 0   |
| 26  | 0   | 470.63536  | 888.900543 | 38.139051  | 123.093001 | 4   | 0   |
| 241 | 37  | 500.964622 | 480.224754 | 379.111589 | 939.188181 | 55  | 13  |
| 244 | 44  | 688.812914 | 785.714627 | 467.105317 | 907.699027 | 77  | 33  |
| 104 | 27  | 530.106506 | 433.320468 | 223.801879 | 649.326523 | 76  | 24  |
| 359 | 210 | 586.554    | 819.311    | 337.594    | 662.912    | 168 | 132 |
| 128 | 41  | 533.447531 | 357.722315 | 169.583122 | 570.228109 | 94  | 33  |
| 34  | 11  | 271.690271 | 204.125019 | 33.644812  | 79.790354  | 8   | 3   |
| 47  | 15  | 541.021853 | 549.492305 | 98.959972  | 283.512685 | 29  | 12  |
| 128 | 11  | 597.661649 | 584.103218 | 268.555068 | 726.238281 | 38  | 10  |
| 375 | 97  | 580.435823 | 826.749379 | 324.126504 | 645.872667 | 71  | 45  |
| 157 | 0   | 536.392788 | 374.557929 | 139.698828 | 509.900632 | 48  | 0   |
| 40  | 0   | 249.422329 | 179.932829 | 19.831497  | 48.979473  | 2   | 0   |
| 60  | 0   | 530.085184 | 724.638048 | 93.137941  | 238.911084 | 10  | 0   |
| 128 | 19  | 597.661649 | 584.103218 | 268.555068 | 726.238281 | 38  | 18  |
| 375 | 126 | 580.435823 | 826.749379 | 324.126504 | 645.872667 | 71  | 53  |
| 157 | 23  | 536.392788 | 374.557929 | 139.698828 | 509.900632 | 48  | 7   |
| 40  | 0   | 249.422329 | 179.932829 | 19.831497  | 48.979473  | 2   | 0   |
| 60  | 0   | 530.085184 | 724.638048 | 93.137941  | 238.911084 | 10  | 0   |

### AnnotatedResults

|     |     |            |            |            |            |    |    |
|-----|-----|------------|------------|------------|------------|----|----|
| 163 | 20  | 553.155507 | 519.474217 | 368.656419 | 965.826511 | 47 | 19 |
| 364 | 88  | 609.084524 | 898.986134 | 328.228072 | 718.874889 | 69 | 47 |
| 171 | 0   | 518.460318 | 400.822336 | 196.356549 | 620.589266 | 45 | 0  |
| 83  | 0   | 232.01005  | 194.526753 | 65.652237  | 156.263033 | 7  | 0  |
| 138 | 0   | 557.103012 | 761.270318 | 97.335905  | 300.542566 | 22 | 0  |
| 179 | 20  | 539.516854 | 522.629513 | 332.519015 | 924.771071 | 48 | 19 |
| 405 | 89  | 588.649271 | 887.952368 | 302.901856 | 707.493238 | 71 | 48 |
| 198 | 0   | 491.607259 | 388.149189 | 173.487413 | 584.52662  | 49 | 0  |
| 96  | 0   | 254.887081 | 240.651955 | 56.547806  | 145.284147 | 8  | 0  |
| 163 | 0   | 535.811725 | 725.858944 | 86.413754  | 279.825086 | 29 | 0  |
| 179 | 28  | 539.516854 | 522.629513 | 332.519015 | 924.771071 | 48 | 22 |
| 405 | 126 | 588.649271 | 887.952368 | 302.901856 | 707.493238 | 71 | 59 |
| 198 | 18  | 491.607259 | 388.149189 | 173.487413 | 584.52662  | 49 | 5  |
| 96  | 0   | 254.887081 | 240.651955 | 56.547806  | 145.284147 | 8  | 0  |
| 163 | 16  | 535.811725 | 725.858944 | 86.413754  | 279.825086 | 29 | 10 |
| 121 | 20  | 198.620209 | 237.639916 | 50.542991  | 162.57072  | 21 | 2  |
| 50  | 15  | 306.168285 | 179.322491 | 99.67887   | 330.532088 | 21 | 4  |
| 0   | 0   |            |            |            |            | 0  | 0  |
| 26  | 2   | 346.234521 | 468.019479 | 41.076787  | 96.90659   | 10 | 0  |
| 125 | 0   | 194.945266 | 207.804082 | 37.397609  | 136.32166  | 6  | 0  |
| 68  | 11  | 344.217941 | 317.511335 | 162.978966 | 428.560481 | 7  | 0  |
| 2   | 0   | 913.479742 | 733.175407 | 353.913043 | 500.508626 | 1  | 0  |
| 37  | 0   | 255.46853  | 197.800147 | 54.738609  | 111.914044 | 4  | 0  |
| 125 | 0   | 194.945266 | 207.804082 | 37.397609  | 136.32166  | 6  | 0  |
| 68  | 11  | 344.217941 | 317.511335 | 162.978966 | 428.560481 | 7  | 0  |
| 2   | 0   | 913.479742 | 733.175407 | 353.913043 | 500.508626 | 1  | 0  |
| 37  | 0   | 255.46853  | 197.800147 | 54.738609  | 111.914044 | 4  | 0  |
| 116 | 0   | 236.65421  | 352.30868  | 54.07482   | 209.705152 | 8  | 0  |
| 76  | 10  | 409.227923 | 614.194494 | 66.810793  | 250.329442 | 10 | 0  |
| 4   | 0   | 1242.65911 | 1692.35518 | 6.75       | 13.5       | 2  | 0  |
| 11  | 0   | 575.678242 | 960.273673 | 47.280933  | 135.399268 | 2  | 0  |
| 151 | 0   | 210.775699 | 316.6845   | 47.449872  | 189.569843 | 8  | 0  |
| 108 | 11  | 426.99993  | 600.690738 | 105.374607 | 355.15624  | 16 | 0  |
| 9   | 0   | 976.752009 | 1169.17612 | 54.056509  | 92.963975  | 4  | 0  |
| 33  | 0   | 341.77615  | 585.05051  | 34.33883   | 97.58155   | 3  | 0  |
| 151 | 6   | 210.775699 | 316.6845   | 47.449872  | 189.569843 | 8  | 0  |
| 108 | 11  | 426.99993  | 600.690738 | 105.374607 | 355.15624  | 16 | 0  |
| 9   | 0   | 976.752009 | 1169.17612 | 54.056509  | 92.963975  | 4  | 0  |
| 33  | 0   | 341.77615  | 585.05051  | 34.33883   | 97.58155   | 3  | 0  |
| 8   | 3   | 296.821671 | 139.524768 | 1243.63263 | 1219.38667 | 4  | 1  |
| 54  | 18  | 448.441126 | 561.955665 | 125.157176 | 752.801151 | 29 | 10 |
| 0   | 0   |            |            |            |            | 0  | 0  |
| 3   | 0   | 398.084    | 411.753    | 33.4458    | 57.9298    | 2  | 0  |
| 8   | 0   | 214.691187 | 67.333299  | 448.204751 | 596.255719 | 0  | 0  |
| 54  | 0   | 460.374729 | 579.45051  | 267.419878 | 1103.77076 | 8  | 0  |
| 2   | 0   | 1065.25    | 1366.34    | 590.977    | 749        | 1  | 0  |
| 4   | 0   | 100.658088 | 79.632497  | 23.931034  | 47.862069  | 0  | 0  |
| 8   | 0   | 214.691187 | 67.333299  | 448.204751 | 596.255719 | 0  | 0  |
| 54  | 6   | 460.374729 | 579.45051  | 267.419878 | 1103.77076 | 8  | 0  |
| 2   | 0   | 1065.25488 | 1366.33554 | 590.976829 | 749.000271 | 1  | 0  |
| 4   | 0   | 100.658088 | 79.632497  | 23.931034  | 47.862069  | 0  | 0  |
| 10  | 0   | 389.638532 | 141.938169 | 932.004232 | 1432.68236 | 1  | 0  |
| 11  | 0   | 714.380862 | 853.084123 | 58.622973  | 189.29445  | 3  | 0  |
| 7   | 0   | 433.727455 | 411.843294 | 287.811305 | 601.993256 | 1  | 0  |
| 19  | 0   | 435.450002 | 906.419309 | 57.950805  | 94.073058  | 3  | 0  |
| 23  | 0   | 449.471557 | 576.396689 | 673.835529 | 1123.31747 | 2  | 0  |
| 19  | 0   | 582.36386  | 732.163167 | 170.56624  | 532.189946 | 4  | 0  |
| 21  | 0   | 323.22173  | 337.630724 | 199.403464 | 393.264675 | 2  | 0  |

AnnotatedResults

|     |    |            |            |            |            |     |    |
|-----|----|------------|------------|------------|------------|-----|----|
| 32  | 0  | 412.682052 | 797.651917 | 66.615245  | 108.216705 | 5   | 0  |
| 23  | 0  | 449.471557 | 576.396689 | 673.835529 | 1123.31747 | 2   | 0  |
| 19  | 0  | 582.36386  | 732.163167 | 170.56624  | 532.189946 | 4   | 0  |
| 21  | 0  | 323.22173  | 337.630724 | 199.403464 | 393.264675 | 2   | 0  |
| 32  | 0  | 412.682052 | 797.651917 | 66.615245  | 108.216705 | 5   | 0  |
| 0   | 0  |            |            |            |            | 0   | 0  |
| 1   | 0  | 122.375    |            | 0          |            | 0   | 0  |
| 1   | 0  | 122.375    |            | 0          |            | 0   | 0  |
| 7   | 0  | 115.736008 | 111.91359  | 98.398455  | 137.069602 | 0   | 0  |
| 12  | 0  | 159.285419 | 169.178667 | 96.879773  | 141.744958 | 0   | 0  |
| 12  | 0  | 159.285419 | 169.178667 | 96.879773  | 141.744958 | 0   | 0  |
| 121 | 53 | 518.854705 | 825.044449 | 188.467026 | 573.162035 | 73  | 35 |
| 157 | 60 | 985.841154 | 588.438751 | 208.830011 | 706.505503 | 148 | 60 |
| 34  | 4  | 279.005664 | 252.303676 | 38.311732  | 96.334278  | 11  | 0  |
| 21  | 0  | 248.49522  | 200.741142 | 8.54772    | 20.979979  | 4   | 0  |
| 26  | 2  | 606.539117 | 1198.54283 | 366.268328 | 1164.28101 | 5   | 2  |
| 131 | 10 | 537.240254 | 833.769516 | 193.769089 | 590.360678 | 22  | 0  |
| 176 | 0  | 970.530332 | 584.283808 | 209.723877 | 693.587715 | 129 | 0  |
| 53  | 0  | 254.386518 | 218.695609 | 25.424631  | 79.512435  | 3   | 0  |
| 20  | 0  | 320.366022 | 259.093577 | 1.111111   | 4.96904    | 2   | 0  |
| 36  | 0  | 449.986393 | 1038.06477 | 146.532579 | 731.992682 | 3   | 0  |
| 131 | 10 | 537.240254 | 833.769516 | 193.769089 | 590.360678 | 22  | 0  |
| 176 | 19 | 970.530332 | 584.283808 | 209.723877 | 693.587715 | 129 | 15 |
| 53  | 0  | 254.386518 | 218.695609 | 25.424631  | 79.512435  | 3   | 0  |
| 20  | 0  | 320.366022 | 259.093577 | 1.111111   | 4.96904    | 2   | 0  |
| 36  | 0  | 449.986393 | 1038.06477 | 146.532579 | 731.992682 | 3   | 0  |
| 127 | 10 | 494.233816 | 595.140568 | 113.478107 | 394.724137 | 21  | 0  |
| 224 | 11 | 840.717363 | 481.955279 | 286.874464 | 870.671837 | 142 | 9  |
| 68  | 0  | 243.151418 | 231.113809 | 23.505501  | 111.372492 | 3   | 0  |
| 53  | 0  | 245.987454 | 235.731607 | 7.091538   | 29.36986   | 4   | 0  |
| 42  | 0  | 362.237367 | 665.092134 | 82.168017  | 254.889863 | 4   | 0  |
| 136 | 0  | 493.90836  | 580.054797 | 113.422998 | 385.968141 | 23  | 0  |
| 257 | 23 | 806.913786 | 479.228845 | 264.212965 | 831.507395 | 156 | 16 |
| 94  | 0  | 226.438859 | 194.159192 | 22.162654  | 99.081185  | 4   | 0  |
| 81  | 0  | 280.409113 | 333.821076 | 9.667211   | 35.115574  | 9   | 0  |
| 53  | 0  | 339.715824 | 610.326321 | 84.437192  | 277.932881 | 5   | 0  |
| 136 | 9  | 493.90836  | 580.054797 | 113.422998 | 385.968141 | 23  | 0  |
| 257 | 53 | 806.913786 | 479.228845 | 264.212965 | 831.507395 | 156 | 33 |
| 94  | 6  | 226.438859 | 194.159192 | 22.162654  | 99.081185  | 4   | 0  |
| 81  | 0  | 280.409113 | 333.821076 | 9.667211   | 35.115574  | 9   | 0  |
| 53  | 0  | 339.715824 | 610.326321 | 84.437192  | 277.932881 | 5   | 0  |
| 126 | 41 | 308.918594 | 529.327792 | 107.293892 | 285.763392 | 35  | 7  |
| 82  | 16 | 547.494238 | 626.446073 | 321.110198 | 688.923179 | 48  | 10 |
| 67  | 5  | 229.832658 | 409.570108 | 28.255193  | 87.135291  | 10  | 0  |
| 33  | 5  | 215.741566 | 235.361776 | 48.90947   | 101.42466  | 8   | 3  |
| 13  | 3  | 476.059855 | 551.601521 | 201.729022 | 207.394586 | 6   | 2  |
| 134 | 0  | 336.00183  | 572.030149 | 109.099371 | 289.884069 | 12  | 0  |
| 105 | 0  | 652.124494 | 758.510094 | 395.22743  | 790.785025 | 30  | 0  |
| 71  | 0  | 203.064515 | 361.287344 | 27.915085  | 91.573803  | 5   | 0  |
| 43  | 0  | 157.637952 | 181.1038   | 67.351825  | 120.860217 | 1   | 0  |
| 16  | 0  | 370.745    | 426.856    | 160.002    | 196.842    | 4   | 0  |
| 134 | 0  | 336.00183  | 572.030149 | 109.099371 | 289.884069 | 12  | 0  |
| 105 | 9  | 652.124494 | 758.510094 | 395.22743  | 790.785025 | 30  | 0  |
| 71  | 0  | 203.064515 | 361.287344 | 27.915085  | 91.573803  | 5   | 0  |
| 43  | 0  | 157.637952 | 181.1038   | 67.351825  | 120.860217 | 1   | 0  |
| 16  | 0  | 370.7449   | 426.855757 | 160.002306 | 196.841968 | 4   | 0  |
| 163 | 0  | 367.688379 | 538.08922  | 110.28363  | 379.605013 | 18  | 0  |
| 97  | 0  | 499.588423 | 411.19535  | 265.980317 | 775.176976 | 25  | 0  |

AnnotatedResults

|      |      |            |            |            |            |     |     |
|------|------|------------|------------|------------|------------|-----|-----|
| 131  | 0    | 253.453891 | 465.946124 | 39.660856  | 126.282077 | 11  | 0   |
| 47   | 0    | 230.392208 | 363.049161 | 118.475369 | 292.971511 | 5   | 0   |
| 33   | 0    | 201.303579 | 300.578077 | 163.18817  | 283.141912 | 2   | 0   |
| 186  | 0    | 371.702497 | 563.220418 | 102.223449 | 362.809145 | 20  | 0   |
| 145  | 0    | 528.481855 | 576.987627 | 279.660388 | 774.419679 | 33  | 0   |
| 165  | 0    | 245.640418 | 478.869247 | 33.675046  | 112.085149 | 14  | 0   |
| 82   | 0    | 327.49696  | 476.618174 | 90.689265  | 237.17387  | 12  | 0   |
| 42   | 0    | 205.467557 | 277.830482 | 130.86531  | 259.257646 | 2   | 0   |
| 186  | 0    | 371.702497 | 563.220418 | 102.223449 | 362.809145 | 20  | 0   |
| 145  | 14   | 528.481855 | 576.987627 | 279.660388 | 774.419679 | 33  | 2   |
| 165  | 0    | 245.640418 | 478.869247 | 33.675046  | 112.085149 | 14  | 0   |
| 82   | 0    | 327.49696  | 476.618174 | 90.689265  | 237.17387  | 12  | 0   |
| 42   | 0    | 205.467557 | 277.830482 | 130.86531  | 259.257646 | 2   | 0   |
| 4    | 0    | 2357.04186 | 2207.74667 | 315.027671 | 417.295041 | 3   | 0   |
| 8    | 0    | 524.863745 | 665.153293 | 277.819517 | 664.106096 | 3   | 0   |
| 86   | 22   | 183.866    | 219.272    | 69.6737    | 205.701    | 11  | 4   |
| 0    | 0    |            |            |            |            | 0   | 0   |
| 9    | 0    | 2569.11092 | 2135.48836 | 385.631386 | 355.488603 | 6   | 0   |
| 9    | 0    | 475.727672 | 638.316076 | 247.43591  | 627.818046 | 3   | 0   |
| 95   | 0    | 173.984061 | 209.674367 | 84.805587  | 230.8922   | 5   | 0   |
| 1    | 0    | 586.664634 |            | 587.957317 |            | 0   | 0   |
| 9    | 0    | 2569.11092 | 2135.48836 | 385.631386 | 355.488603 | 6   | 0   |
| 9    | 0    | 475.727672 | 638.316076 | 247.43591  | 627.818046 | 3   | 0   |
| 95   | 7    | 173.984061 | 209.674367 | 84.805587  | 230.8922   | 5   | 1   |
| 1    | 0    | 586.664634 |            | 587.957317 |            | 0   | 0   |
| 0    | 0    |            |            |            |            | 0   | 0   |
| 13   | 0    | 178.837209 | 153.53192  | 19.190221  | 60.324728  | 1   | 0   |
| 67   | 0    | 209.678476 | 313.701403 | 88.153311  | 192.933939 | 4   | 0   |
| 4    | 0    | 363.298568 | 178.505398 | 10.214758  | 20.429515  | 0   | 0   |
| 7    | 0    | 697.385762 | 583.902542 | 85.386173  | 225.488667 | 3   | 0   |
| 31   | 0    | 191.558594 | 144.626606 | 42.479121  | 162.263435 | 1   | 0   |
| 118  | 0    | 206.717188 | 266.580064 | 79.545624  | 186.662955 | 8   | 0   |
| 5    | 0    | 348.11314  | 158.275453 | 8.171806   | 18.272714  | 0   | 0   |
| 7    | 0    | 697.385762 | 583.902542 | 85.386173  | 225.488667 | 3   | 0   |
| 31   | 0    | 191.558594 | 144.626606 | 42.479121  | 162.263435 | 1   | 0   |
| 118  | 0    | 206.717188 | 266.580064 | 79.545624  | 186.662955 | 8   | 0   |
| 5    | 0    | 348.11314  | 158.275453 | 8.171806   | 18.272714  | 0   | 0   |
| 3906 | 3193 | 116.85729  | 72.274276  | 1.575631   | 33.6286    | 35  | 22  |
| 3563 | 2565 | 166.737602 | 73.776837  | 1.165205   | 12.272567  | 183 | 130 |
| 1487 | 892  | 154.512411 | 100.310505 | 1.711156   | 14.48847   | 69  | 41  |
| 4130 | 305  | 117.66368  | 72.480776  | 1.52259    | 32.656404  | 11  | 0   |
| 3778 | 757  | 165.907533 | 73.387674  | 1.227383   | 13.461626  | 2   | 0   |
| 1612 | 165  | 154.041702 | 103.538466 | 1.88115    | 14.858503  | 9   | 0   |
| 4130 | 624  | 117.66368  | 72.480776  | 1.52259    | 32.656404  | 11  | 0   |
| 3778 | 1299 | 165.907533 | 73.387674  | 1.227383   | 13.461626  | 2   | 0   |
| 1612 | 270  | 154.041702 | 103.538466 | 1.88115    | 14.858503  | 9   | 0   |
| 3690 | 139  | 116.164086 | 73.105645  | 2.709757   | 52.98993   | 7   | 0   |
| 2778 | 360  | 174.142353 | 74.942169  | 1.018302   | 18.796348  | 2   | 0   |
| 2356 | 211  | 151.41128  | 92.915172  | 2.729136   | 20.178247  | 12  | 0   |
| 3701 | 138  | 116.125845 | 73.271359  | 2.72352    | 53.356168  | 7   | 0   |
| 2778 | 360  | 174.142353 | 74.942169  | 1.018302   | 18.796348  | 2   | 0   |
| 2673 | 308  | 148.961912 | 91.038473  | 2.574962   | 19.457458  | 13  | 0   |
| 3701 | 388  | 116.125845 | 73.271359  | 2.72352    | 53.356168  | 7   | 0   |
| 2778 | 671  | 174.142353 | 74.942169  | 1.018302   | 18.796348  | 2   | 0   |
| 2673 | 572  | 148.961912 | 91.038473  | 2.574962   | 19.457458  | 13  | 1   |
| 11   | 0    | 295.272713 | 238.761356 | 23.104906  | 54.780993  | 4   | 0   |
| 4    | 0    | 675.844247 | 703.622224 | 72.819188  | 145.638376 | 2   | 0   |
| 6    | 0    | 206.133603 | 77.630864  | 0          | 0          | 1   | 0   |



AnnotatedResults

|     |    |            |            |            |            |    |    |
|-----|----|------------|------------|------------|------------|----|----|
| 6   | 0  | 439.721537 | 366.066837 | 16.770571  | 20.72176   | 3  | 0  |
| 11  | 0  | 172.074516 | 99.724057  | 0          | 0          | 0  | 0  |
| 5   | 0  | 557.821184 | 664.048487 | 58.255351  | 130.262924 | 2  | 0  |
| 10  | 0  | 165.115704 | 70.502014  | 182.095895 | 575.83778  | 0  | 0  |
| 16  | 0  | 348.958924 | 312.17149  | 6.559035   | 14.711158  | 3  | 0  |
| 11  | 0  | 172.074516 | 99.724057  | 0          | 0          | 0  | 0  |
| 5   | 0  | 557.821184 | 664.048487 | 58.255351  | 130.262924 | 2  | 0  |
| 10  | 0  | 165.115704 | 70.502014  | 182.095895 | 575.83778  | 0  | 0  |
| 16  | 0  | 348.958924 | 312.17149  | 6.559035   | 14.711158  | 3  | 0  |
| 7   | 0  | 519.285534 | 625.686798 | 1.570898   | 4.156204   | 2  | 0  |
| 3   | 0  | 310.722448 | 113.637278 | 3.878626   | 5.437766   | 0  | 0  |
| 55  | 0  | 240.557703 | 142.972349 | 327.342915 | 731.232228 | 3  | 0  |
| 23  | 0  | 251.755284 | 220.476444 | 7.508616   | 18.662272  | 2  | 0  |
| 16  | 0  | 363.139288 | 452.03053  | 21.477461  | 58.089721  | 2  | 0  |
| 9   | 0  | 346.951295 | 350.702849 | 14.828778  | 40.258711  | 2  | 0  |
| 81  | 0  | 271.376553 | 298.663241 | 329.860274 | 722.500452 | 5  | 0  |
| 42  | 0  | 262.691596 | 326.956188 | 7.814828   | 22.654804  | 3  | 0  |
| 16  | 0  | 363.139288 | 452.03053  | 21.477461  | 58.089721  | 2  | 0  |
| 9   | 0  | 346.951295 | 350.702849 | 14.828778  | 40.258711  | 2  | 0  |
| 81  | 6  | 271.376553 | 298.663241 | 329.860274 | 722.500452 | 5  | 0  |
| 42  | 0  | 262.691596 | 326.956188 | 7.814828   | 22.654804  | 3  | 0  |
| 152 | 21 | 232.817482 | 137.579491 | 7.132764   | 43.831784  | 36 | 9  |
| 173 | 63 | 223.0757   | 171.250123 | 2.499791   | 21.467866  | 36 | 11 |
| 136 | 32 | 242.974432 | 150.714375 | 2.019745   | 18.991481  | 39 | 9  |
| 314 | 95 | 209.59358  | 128.428837 | 2.836672   | 16.982995  | 55 | 9  |
| 213 | 0  | 235.218512 | 161.676937 | 6.031937   | 41.702271  | 7  | 0  |
| 192 | 0  | 212.345462 | 155.213445 | 3.229971   | 22.203508  | 5  | 0  |
| 146 | 0  | 240.736185 | 152.642544 | 1.879728   | 18.331854  | 5  | 0  |
| 351 | 0  | 210.922627 | 129.421175 | 1.774092   | 14.274845  | 6  | 0  |
| 213 | 12 | 235.218512 | 161.676937 | 6.031937   | 41.702271  | 7  | 0  |
| 192 | 0  | 212.345462 | 155.213445 | 3.229971   | 22.203508  | 5  | 0  |
| 146 | 6  | 240.736185 | 152.642544 | 1.879728   | 18.331854  | 5  | 0  |
| 351 | 13 | 210.922627 | 129.421175 | 1.774092   | 14.274845  | 6  | 2  |
| 81  | 0  | 241.046346 | 189.739483 | 4.835809   | 30.343003  | 5  | 0  |
| 184 | 0  | 221.079139 | 156.776375 | 1.579087   | 8.836319   | 4  | 0  |
| 69  | 0  | 275.659649 | 264.520463 | 25.405516  | 104.982513 | 4  | 0  |
| 273 | 0  | 208.673727 | 131.85483  | 4.789595   | 29.820911  | 5  | 0  |
| 103 | 0  | 250.36231  | 242.120592 | 6.588193   | 36.867336  | 6  | 0  |
| 205 | 0  | 217.627133 | 155.800082 | 1.37362    | 7.9756     | 5  | 0  |
| 92  | 0  | 277.54294  | 291.378614 | 33.123298  | 157.977617 | 6  | 0  |
| 292 | 0  | 207.628346 | 130.711621 | 4.577066   | 28.880966  | 5  | 0  |
| 103 | 0  | 250.36231  | 242.120592 | 6.588193   | 36.867336  | 6  | 0  |
| 205 | 12 | 217.627133 | 155.800082 | 1.37362    | 7.9756     | 5  | 0  |
| 92  | 0  | 277.54294  | 291.378614 | 33.123298  | 157.977617 | 6  | 0  |
| 292 | 0  | 207.628346 | 130.711621 | 4.577066   | 28.880966  | 5  | 0  |
| 8   | 2  | 323.166909 | 222.085258 | 41.155491  | 69.586888  | 3  | 1  |
| 15  | 0  | 303.874375 | 484.516158 | 98.925713  | 274.455075 | 3  | 0  |
| 40  | 7  | 418.632242 | 679.356703 | 108.437213 | 266.483234 | 11 | 3  |
| 0   | 0  |            |            |            |            | 0  | 0  |
| 10  | 0  | 582.726344 | 1005.25528 | 22.369737  | 43.383842  | 2  | 0  |
| 29  | 0  | 161.793171 | 120.025071 | 106.891445 | 263.451136 | 0  | 0  |
| 46  | 0  | 400.26229  | 661.45708  | 137.26181  | 296.60909  | 8  | 0  |
| 0   | 0  |            |            |            |            | 0  | 0  |
| 10  | 0  | 582.726344 | 1005.25528 | 22.369737  | 43.383842  | 2  | 0  |
| 29  | 0  | 161.793171 | 120.025071 | 106.891445 | 263.451136 | 0  | 0  |
| 46  | 0  | 400.26229  | 661.45708  | 137.26181  | 296.60909  | 8  | 0  |
| 0   | 0  |            |            |            |            | 0  | 0  |
| 12  | 0  | 633.204088 | 862.480583 | 42.399261  | 69.20669   | 4  | 0  |

AnnotatedResults

|     |     |            |            |            |            |     |     |
|-----|-----|------------|------------|------------|------------|-----|-----|
| 59  | 0   | 258.036233 | 293.812211 | 125.454509 | 381.845577 | 4   | 0   |
| 42  | 0   | 304.970524 | 486.224175 | 41.544252  | 95.030074  | 5   | 0   |
| 3   | 0   | 439.517506 | 573.095202 | 69.936903  | 84.730852  | 1   | 0   |
| 25  | 0   | 808.924786 | 1150.35928 | 100.625032 | 222.223848 | 7   | 0   |
| 79  | 0   | 207.21426  | 189.312809 | 105.654953 | 341.814429 | 2   | 0   |
| 74  | 0   | 402.178765 | 709.471448 | 33.263353  | 80.941902  | 10  | 0   |
| 5   | 0   | 285.710504 | 457.619568 | 131.075186 | 188.186734 | 1   | 0   |
| 25  | 0   | 808.924786 | 1150.35928 | 100.625032 | 222.223848 | 7   | 0   |
| 79  | 0   | 207.21426  | 189.312809 | 105.654953 | 341.814429 | 2   | 0   |
| 74  | 6   | 402.178765 | 709.471448 | 33.263353  | 80.941902  | 10  | 0   |
| 5   | 0   | 285.710504 | 457.619568 | 131.075186 | 188.186734 | 1   | 0   |
| 519 | 257 | 605.896527 | 923.275499 | 571.431487 | 926.430676 | 258 | 177 |
| 258 | 84  | 457.790522 | 741.111486 | 303.126922 | 547.43577  | 94  | 27  |
| 320 | 149 | 271.495658 | 479.68889  | 69.894919  | 128.345749 | 65  | 37  |
| 559 | 127 | 611.762863 | 942.409003 | 557.677971 | 907.62472  | 113 | 60  |
| 269 | 12  | 453.166129 | 728.589955 | 301.547881 | 540.818029 | 36  | 3   |
| 326 | 44  | 272.067647 | 477.819736 | 70.576264  | 126.68736  | 31  | 9   |
| 559 | 156 | 611.762863 | 942.409003 | 557.677971 | 907.62472  | 113 | 64  |
| 269 | 37  | 453.166129 | 728.589955 | 301.547881 | 540.818029 | 36  | 5   |
| 326 | 72  | 272.067647 | 477.819736 | 70.576264  | 126.68736  | 31  | 15  |
| 631 | 149 | 680.525142 | 992.245194 | 783.912061 | 1245.01779 | 154 | 77  |
| 267 | 14  | 405.083897 | 655.921736 | 339.657317 | 651.499902 | 32  | 2   |
| 249 | 13  | 302.630366 | 473.403187 | 81.497694  | 162.344474 | 30  | 5   |
| 701 | 167 | 658.357462 | 973.407695 | 738.564749 | 1219.12326 | 166 | 84  |
| 321 | 11  | 378.695991 | 626.99484  | 309.093579 | 618.022133 | 35  | 1   |
| 309 | 14  | 310.941509 | 501.310278 | 83.890888  | 168.317108 | 37  | 5   |
| 701 | 236 | 658.357462 | 973.407695 | 738.564749 | 1219.12326 | 166 | 104 |
| 321 | 33  | 378.695991 | 626.99484  | 309.093579 | 618.022133 | 35  | 3   |
| 309 | 42  | 310.941509 | 501.310278 | 83.890888  | 168.317108 | 37  | 13  |
| 93  | 29  | 533.936619 | 750.361309 | 197.790677 | 494.370623 | 56  | 15  |
| 197 | 99  | 816.122019 | 1145.07916 | 470.257028 | 711.965116 | 111 | 69  |
| 173 | 60  | 773.268379 | 1066.54303 | 394.854435 | 713.587754 | 99  | 42  |
| 242 | 102 | 499.608866 | 507.635973 | 304.450835 | 628.211566 | 136 | 67  |
| 64  | 13  | 263.047874 | 304.705253 | 38.936197  | 122.879451 | 17  | 3   |
| 113 | 10  | 730.021921 | 1049.59938 | 231.595271 | 499.856586 | 22  | 10  |
| 231 | 80  | 852.320322 | 1201.63182 | 485.303518 | 768.490636 | 70  | 50  |
| 187 | 12  | 753.651272 | 1025.65143 | 360.038749 | 698.727405 | 49  | 0   |
| 262 | 10  | 475.056574 | 460.219054 | 309.387919 | 633.461429 | 56  | 0   |
| 60  | 0   | 298.548595 | 426.145807 | 52.65803   | 146.766766 | 7   | 0   |
| 113 | 10  | 730.021921 | 1049.59938 | 231.595271 | 499.856586 | 22  | 10  |
| 231 | 80  | 852.320322 | 1201.63182 | 485.303518 | 768.490636 | 70  | 50  |
| 187 | 27  | 753.651272 | 1025.65143 | 360.038749 | 698.727405 | 49  | 15  |
| 262 | 57  | 475.056574 | 460.219054 | 309.387919 | 633.461429 | 56  | 21  |
| 60  | 0   | 298.548595 | 426.145807 | 52.65803   | 146.766766 | 7   | 0   |
| 111 | 0   | 639.70344  | 980.475322 | 453.412942 | 888.893612 | 22  | 0   |
| 229 | 57  | 880.657242 | 1282.02448 | 592.281061 | 1123.69368 | 65  | 45  |
| 215 | 15  | 843.311608 | 1184.54435 | 598.501058 | 962.727423 | 66  | 0   |
| 258 | 10  | 464.604638 | 488.679684 | 408.752185 | 854.360736 | 53  | 4   |
| 63  | 0   | 267.02762  | 333.22854  | 28.50334   | 89.731971  | 5   | 0   |
| 134 | 0   | 588.845829 | 925.401637 | 367.577676 | 808.839125 | 23  | 0   |
| 263 | 58  | 830.528862 | 1225.36229 | 522.464367 | 1074.21134 | 73  | 46  |
| 253 | 25  | 787.378184 | 1122.0288  | 574.108476 | 935.058629 | 74  | 1   |
| 303 | 42  | 461.179959 | 506.77244  | 361.535786 | 806.358949 | 64  | 6   |
| 92  | 0   | 253.609444 | 318.585943 | 34.817613  | 105.845238 | 6   | 0   |
| 134 | 15  | 588.845829 | 925.401637 | 367.577676 | 808.839125 | 23  | 9   |
| 263 | 71  | 830.528862 | 1225.36229 | 522.464367 | 1074.21134 | 73  | 46  |
| 253 | 53  | 787.378184 | 1122.0288  | 574.108476 | 935.058629 | 74  | 17  |
| 303 | 77  | 461.179959 | 506.77244  | 361.535786 | 806.358949 | 64  | 14  |

## AnnotatedResults

|     |     |            |            |            |            |     |     |
|-----|-----|------------|------------|------------|------------|-----|-----|
| 92  | 0   | 253.609444 | 318.585943 | 34.817613  | 105.845238 | 6   | 0   |
| 255 | 140 | 971.197054 | 1122.45409 | 647.603205 | 937.895154 | 193 | 125 |
| 66  | 10  | 386.482198 | 769.450251 | 56.255805  | 254.070564 | 15  | 0   |
| 113 | 20  | 220.189055 | 198.089524 | 10.58587   | 78.457513  | 23  | 4   |
| 97  | 47  | 566.66607  | 884.944559 | 277.696289 | 668.94026  | 59  | 33  |
| 278 | 61  | 952.473698 | 1100.77304 | 619.250973 | 919.105777 | 115 | 53  |
| 65  | 0   | 290.115934 | 461.411563 | 61.194401  | 258.564888 | 5   | 0   |
| 144 | 0   | 227.680634 | 211.496005 | 13.401941  | 81.728917  | 5   | 0   |
| 103 | 0   | 544.293568 | 875.570003 | 263.235124 | 652.776983 | 16  | 0   |
| 278 | 88  | 952.473698 | 1100.77304 | 619.250973 | 919.105777 | 115 | 68  |
| 65  | 0   | 290.115934 | 461.411563 | 61.194401  | 258.564888 | 5   | 0   |
| 144 | 0   | 227.680634 | 211.496005 | 13.401941  | 81.728917  | 5   | 0   |
| 103 | 7   | 544.293568 | 875.570003 | 263.235124 | 652.776983 | 16  | 1   |
| 293 | 84  | 899.309969 | 1067.16272 | 750.327998 | 1078.28602 | 115 | 66  |
| 105 | 0   | 264.903188 | 388.358987 | 38.74107   | 162.203588 | 8   | 0   |
| 179 | 0   | 234.805805 | 273.663695 | 15.920821  | 107.532292 | 9   | 0   |
| 139 | 0   | 512.76972  | 715.448539 | 322.682699 | 888.612057 | 29  | 0   |
| 325 | 88  | 844.640063 | 1036.92519 | 707.022081 | 1052.52056 | 116 | 67  |
| 117 | 0   | 262.531711 | 390.978532 | 35.491168  | 153.801079 | 8   | 0   |
| 208 | 0   | 221.764716 | 252.839022 | 15.091934  | 100.98668  | 8   | 0   |
| 161 | 0   | 468.558754 | 675.469649 | 280.32963  | 831.62619  | 30  | 0   |
| 325 | 125 | 844.640063 | 1036.92519 | 707.022081 | 1052.52056 | 116 | 74  |
| 117 | 9   | 262.531711 | 390.978532 | 35.491168  | 153.801079 | 8   | 0   |
| 208 | 0   | 221.764716 | 252.839022 | 15.091934  | 100.98668  | 8   | 0   |
| 161 | 26  | 468.558754 | 675.469649 | 280.32963  | 831.62619  | 30  | 7   |
| 163 | 57  | 234.245578 | 290.887748 | 28.020469  | 116.191554 | 36  | 11  |
| 188 | 76  | 316.567013 | 509.170744 | 39.261954  | 120.378764 | 46  | 12  |
| 150 | 54  | 294.020743 | 494.583584 | 35.459109  | 102.620669 | 40  | 13  |
| 439 | 275 | 1124.08172 | 1540.55628 | 565.589949 | 856.815945 | 269 | 202 |
| 187 | 0   | 226.434444 | 243.550161 | 26.590065  | 113.027016 | 12  | 0   |
| 180 | 0   | 315.490183 | 511.966197 | 36.820207  | 116.368063 | 22  | 0   |
| 164 | 0   | 249.231726 | 413.314818 | 29.021131  | 93.729764  | 10  | 0   |
| 492 | 236 | 1081.5431  | 1501.41714 | 532.639358 | 828.911704 | 164 | 134 |
| 187 | 0   | 226.434444 | 243.550161 | 26.590065  | 113.027016 | 12  | 0   |
| 180 | 0   | 315.490183 | 511.966197 | 36.820207  | 116.368063 | 22  | 0   |
| 164 | 12  | 249.231726 | 413.314818 | 29.021131  | 93.729764  | 10  | 1   |
| 492 | 265 | 1081.5431  | 1501.41714 | 532.639358 | 828.911704 | 164 | 134 |
| 149 | 0   | 290.949862 | 512.977575 | 60.063881  | 254.52432  | 10  | 0   |
| 170 | 0   | 358.524075 | 615.819675 | 69.829052  | 262.072333 | 22  | 0   |
| 168 | 0   | 304.227321 | 466.933566 | 26.203555  | 91.174298  | 18  | 0   |
| 480 | 235 | 934.872291 | 1218.65207 | 762.547622 | 1134.31864 | 151 | 114 |
| 191 | 0   | 259.074105 | 412.38426  | 35.935878  | 122.630088 | 13  | 0   |
| 205 | 0   | 381.036619 | 701.415753 | 59.196587  | 231.811682 | 28  | 0   |
| 192 | 0   | 321.891893 | 506.511401 | 31.569033  | 110.662035 | 23  | 0   |
| 529 | 257 | 893.309186 | 1191.66739 | 708.423585 | 1112.01684 | 163 | 130 |
| 191 | 0   | 259.074105 | 412.38426  | 35.935878  | 122.630088 | 13  | 0   |
| 205 | 0   | 381.036619 | 701.415753 | 59.196587  | 231.811682 | 28  | 0   |
| 192 | 19  | 321.891893 | 506.511401 | 31.569033  | 110.662035 | 23  | 3   |
| 529 | 303 | 893.309186 | 1191.66739 | 708.423585 | 1112.01684 | 163 | 131 |
| 77  | 9   | 310.489819 | 224.741795 | 119.804179 | 410.25189  | 29  | 4   |
| 31  | 0   | 393.227554 | 353.871346 | 95.778166  | 167.245583 | 14  | 0   |
| 49  | 8   | 273.279347 | 374.209742 | 36.4651    | 78.16472   | 14  | 0   |
| 45  | 0   | 252.901165 | 235.668756 | 82.238838  | 236.378068 | 13  | 0   |
| 94  | 0   | 319.77408  | 358.505733 | 113.146209 | 393.528244 | 5   | 0   |
| 39  | 0   | 319.470648 | 323.864848 | 108.494314 | 263.519572 | 5   | 0   |
| 52  | 0   | 258.535    | 356.834    | 30.0237    | 69.0436    | 6   | 0   |
| 40  | 0   | 252.245111 | 243.12218  | 31.115432  | 117.12454  | 4   | 0   |
| 94  | 0   | 319.77408  | 358.505733 | 113.146209 | 393.528244 | 5   | 0   |

AnnotatedResults

|       |     |            |            |            |            |     |    |
|-------|-----|------------|------------|------------|------------|-----|----|
| 39    | 0   | 319.470648 | 323.864848 | 108.494314 | 263.519572 | 5   | 0  |
| 52    | 0   | 258.534727 | 356.834317 | 30.023679  | 69.043558  | 6   | 0  |
| 40    | 0   | 252.245111 | 243.12218  | 31.115432  | 117.12454  | 4   | 0  |
| 93    | 0   | 362.273017 | 401.534697 | 246.362844 | 756.467721 | 9   | 0  |
| 59    | 0   | 311.229716 | 316.808753 | 112.8196   | 274.567351 | 7   | 0  |
| 79    | 0   | 271.80643  | 435.875553 | 53.362272  | 209.027358 | 6   | 0  |
| 99    | 0   | 290.91431  | 315.662631 | 42.490508  | 141.983818 | 13  | 0  |
| 106   | 0   | 340.239635 | 382.314021 | 205.240381 | 697.599841 | 9   | 0  |
| 79    | 0   | 281.922503 | 293.598276 | 83.192394  | 217.255008 | 8   | 0  |
| 106   | 0   | 251.822286 | 391.470686 | 44.782077  | 182.136615 | 8   | 0  |
| 212   | 0   | 293.229752 | 304.298719 | 32.409221  | 122.731851 | 28  | 0  |
| 106   | 7   | 340.239635 | 382.314021 | 205.240381 | 697.599841 | 9   | 3  |
| 79    | 8   | 281.922503 | 293.598276 | 83.192394  | 217.255008 | 8   | 0  |
| 106   | 0   | 251.822286 | 391.470686 | 44.782077  | 182.136615 | 8   | 0  |
| 212   | 0   | 293.229752 | 304.298719 | 32.409221  | 122.731851 | 28  | 0  |
| 130   | 47  | 560.606112 | 481.305156 | 628.181662 | 1119.54391 | 91  | 39 |
| 74    | 11  | 353.340908 | 289.710374 | 167.348046 | 449.417052 | 34  | 8  |
| 36    | 3   | 245.62466  | 297.523248 | 5.837011   | 24.024981  | 6   | 0  |
| 72    | 30  | 695.112204 | 981.110459 | 87.625822  | 238.783909 | 30  | 19 |
| 159   | 17  | 578.8561   | 508.484713 | 540.651721 | 1065.52884 | 50  | 13 |
| 92    | 0   | 359.392997 | 271.983683 | 341.262121 | 753.4034   | 13  | 0  |
| 41    | 0   | 283.968481 | 336.381762 | 6.758782   | 23.478925  | 3   | 0  |
| 78    | 20  | 658.568509 | 955.381159 | 78.70233   | 207.018059 | 19  | 16 |
| 159   | 29  | 578.8561   | 508.484713 | 540.651721 | 1065.52884 | 50  | 16 |
| 92    | 6   | 359.392997 | 271.983683 | 341.262121 | 753.4034   | 13  | 2  |
| 41    | 0   | 283.968481 | 336.381762 | 6.758782   | 23.478925  | 3   | 0  |
| 78    | 20  | 658.568509 | 955.381159 | 78.70233   | 207.018059 | 19  | 16 |
| 38165 |     |            |            |            |            |     |    |
| 89    | 0   | 451.433593 | 733.511061 | 311.415613 | 816.934941 | 13  | 0  |
| 35    | 0   | 272.810252 | 318.55377  | 9.413327   | 33.471869  | 2   | 0  |
| 75    | 13  | 516.938128 | 784.394934 | 121.500008 | 304.120049 | 16  | 11 |
| 38165 |     |            |            |            |            |     |    |
| 101   | 0   | 489.899638 | 923.85653  | 319.559561 | 801.7479   | 13  | 0  |
| 63    | 0   | 247.148171 | 305.933854 | 6.397322   | 24.76692   | 6   | 0  |
| 88    | 14  | 487.643719 | 755.657782 | 105.130101 | 268.548223 | 17  | 12 |
| 38165 |     |            |            |            |            |     |    |
| 101   | 0   | 489.899638 | 923.85653  | 319.559561 | 801.7479   | 13  | 0  |
| 63    | 0   | 247.148171 | 305.933854 | 6.397322   | 24.76692   | 6   | 0  |
| 88    | 14  | 487.643719 | 755.657782 | 105.130101 | 268.548223 | 17  | 12 |
| 248   | 144 | 206.03364  | 280.400903 | 218.564578 | 259.107753 | 47  | 16 |
| 187   | 92  | 233.379    | 334.738    | 323.313    | 335.163    | 49  | 21 |
| 352   | 181 | 310.09903  | 311.304344 | 392.211186 | 437.394111 | 142 | 85 |
| 267   | 14  | 215.176405 | 281.489753 | 213.061832 | 255.922089 | 22  | 0  |
| 226   | 59  | 215.717226 | 309.624083 | 282.376945 | 317.948623 | 17  | 2  |
| 358   | 120 | 298.745685 | 301.467106 | 379.762727 | 431.318018 | 44  | 17 |
| 267   | 38  | 215.176405 | 281.489753 | 213.061832 | 255.922089 | 22  | 0  |
| 226   | 72  | 215.717226 | 309.624083 | 282.376945 | 317.948623 | 17  | 2  |
| 358   | 135 | 298.745685 | 301.467106 | 379.762727 | 431.318018 | 44  | 17 |
| 205   | 13  | 227.179088 | 347.557385 | 340.026494 | 356.064969 | 18  | 0  |
| 212   | 53  | 256.015303 | 307.455247 | 404.31258  | 415.045157 | 31  | 1  |
| 228   | 113 | 359.905552 | 333.159733 | 590.805879 | 532.924579 | 39  | 14 |
| 219   | 13  | 232.741754 | 356.663895 | 330.823169 | 355.194332 | 20  | 0  |
| 308   | 59  | 264.51989  | 328.523575 | 364.330946 | 397.649722 | 41  | 1  |
| 287   | 108 | 343.251087 | 325.381532 | 534.201635 | 510.24173  | 41  | 13 |
| 219   | 35  | 232.741754 | 356.663895 | 330.823169 | 355.194332 | 20  | 0  |
| 308   | 74  | 264.51989  | 328.523575 | 364.330946 | 397.649722 | 41  | 1  |
| 287   | 131 | 343.251087 | 325.381532 | 534.201635 | 510.24173  | 41  | 15 |
| 96    | 23  | 257.921832 | 327.275144 | 43.189136  | 159.38364  | 23  | 6  |

AnnotatedResults

|     |    |            |            |            |            |     |    |
|-----|----|------------|------------|------------|------------|-----|----|
| 79  | 20 | 431.058    | 623.119    | 89.9392    | 342.854    | 33  | 11 |
| 6   | 3  | 220.039655 | 406.535729 | 2175.90206 | 2458.64984 | 1   | 0  |
| 64  | 10 | 325.351449 | 621.865371 | 27.405387  | 149.551135 | 20  | 3  |
| 100 | 0  | 279.803401 | 323.53929  | 46.271352  | 203.424924 | 6   | 0  |
| 87  | 0  | 475.037055 | 664.212113 | 109.293005 | 353.726904 | 11  | 0  |
| 8   | 0  | 186.463559 | 348.535622 | 1590.1495  | 2248.27494 | 1   | 0  |
| 73  | 0  | 288.277747 | 581.912887 | 25.999352  | 141.001306 | 4   | 0  |
| 100 | 8  | 279.803401 | 323.53929  | 46.271352  | 203.424924 | 6   | 0  |
| 87  | 0  | 475.037055 | 664.212113 | 109.293005 | 353.726904 | 11  | 0  |
| 8   | 0  | 186.463559 | 348.535622 | 1590.1495  | 2248.27494 | 1   | 0  |
| 73  | 0  | 288.277747 | 581.912887 | 25.999352  | 141.001306 | 4   | 0  |
| 173 | 19 | 247.57956  | 293.268788 | 65.510795  | 157.810792 | 9   | 0  |
| 44  | 0  | 547.300269 | 759.292834 | 141.880632 | 512.096634 | 9   | 0  |
| 7   | 0  | 318.781193 | 181.165347 | 9.418182   | 24.918167  | 0   | 0  |
| 66  | 0  | 319.743258 | 543.675463 | 23.442776  | 135.028536 | 6   | 0  |
| 210 | 18 | 258.344148 | 307.486024 | 63.197267  | 154.238574 | 13  | 0  |
| 73  | 0  | 538.014751 | 712.316477 | 126.741812 | 469.418782 | 14  | 0  |
| 16  | 0  | 253.671972 | 227.981703 | 18.217246  | 44.856437  | 1   | 0  |
| 88  | 0  | 294.371305 | 483.991915 | 18.462547  | 117.359073 | 8   | 0  |
| 210 | 27 | 258.344148 | 307.486024 | 63.197267  | 154.238574 | 13  | 1  |
| 73  | 0  | 538.014751 | 712.316477 | 126.741812 | 469.418782 | 14  | 0  |
| 16  | 0  | 253.671972 | 227.981703 | 18.217246  | 44.856437  | 1   | 0  |
| 88  | 0  | 294.371305 | 483.991915 | 18.462547  | 117.359073 | 8   | 0  |
| 242 | 96 | 337.733525 | 289.320849 | 119.963768 | 357.97435  | 106 | 39 |
| 158 | 54 | 207.021302 | 307.656357 | 89.920804  | 171.302564 | 31  | 11 |
| 161 | 40 | 335.681314 | 314.846228 | 80.332028  | 276.577563 | 68  | 15 |
| 9   | 0  | 467.755585 | 501.003967 | 267.379362 | 424.050999 | 5   | 0  |
| 55  | 2  | 267.288421 | 547.669749 | 16.318393  | 53.81296   | 10  | 0  |
| 265 | 0  | 321.929245 | 266.228864 | 104.060242 | 298.294177 | 23  | 0  |
| 186 | 19 | 196.379312 | 274.694541 | 79.515076  | 166.764968 | 7   | 0  |
| 196 | 0  | 351.581013 | 381.963337 | 83.060493  | 270.690894 | 21  | 0  |
| 21  | 0  | 356.710865 | 361.386617 | 140.55865  | 338.161579 | 2   | 0  |
| 58  | 0  | 247.718169 | 534.032302 | 42.122299  | 135.509023 | 2   | 0  |
| 265 | 36 | 321.929245 | 266.228864 | 104.060242 | 298.294177 | 23  | 2  |
| 186 | 25 | 196.379312 | 274.694541 | 79.515076  | 166.764968 | 7   | 0  |
| 196 | 0  | 351.581013 | 381.963337 | 83.060493  | 270.690894 | 21  | 0  |
| 21  | 0  | 356.710865 | 361.386617 | 140.55865  | 338.161579 | 2   | 0  |
| 58  | 0  | 247.718169 | 534.032302 | 42.122299  | 135.509023 | 2   | 0  |
| 300 | 0  | 333.029295 | 345.285598 | 133.89938  | 403.15935  | 35  | 0  |
| 208 | 34 | 205.002544 | 344.870575 | 112.561583 | 218.445597 | 12  | 0  |
| 211 | 0  | 337.956228 | 364.953719 | 101.277094 | 328.223339 | 21  | 0  |
| 51  | 0  | 218.087903 | 218.235368 | 121.674866 | 336.264502 | 4   | 0  |
| 65  | 0  | 366.782814 | 591.964761 | 24.66198   | 107.862566 | 6   | 0  |
| 346 | 0  | 328.179032 | 336.603829 | 118.887182 | 368.367524 | 37  | 0  |
| 237 | 33 | 230.339404 | 401.229133 | 102.639383 | 212.345773 | 15  | 0  |
| 257 | 0  | 324.421276 | 342.231948 | 86.738754  | 300.309602 | 23  | 0  |
| 62  | 0  | 252.667448 | 317.745285 | 111.161771 | 309.63453  | 6   | 0  |
| 103 | 0  | 429.74626  | 793.687047 | 17.907153  | 87.673512  | 12  | 0  |
| 346 | 36 | 328.179032 | 336.603829 | 118.887182 | 368.367524 | 37  | 1  |
| 237 | 39 | 230.339404 | 401.229133 | 102.639383 | 212.345773 | 15  | 0  |
| 257 | 7  | 324.421276 | 342.231948 | 86.738754  | 300.309602 | 23  | 2  |
| 62  | 7  | 252.667448 | 317.745285 | 111.161771 | 309.63453  | 6   | 2  |
| 103 | 0  | 429.74626  | 793.687047 | 17.907153  | 87.673512  | 12  | 0  |
| 0   | 0  |            |            |            |            | 0   | 0  |
| 3   | 2  | 1868.52933 | 1347.47088 | 1764.16484 | 1528.18533 | 3   | 2  |
| 5   | 0  | 92.816121  | 34.406711  | 0          | 0          | 0   | 0  |
| 17  | 0  | 213.583736 | 134.347912 | 132.644386 | 502.425346 | 3   | 0  |
| 26  | 2  | 570.282002 | 989.890061 | 161.167421 | 735.236461 | 9   | 0  |

AnnotatedResults

|     |    |            |            |            |            |    |    |
|-----|----|------------|------------|------------|------------|----|----|
| 6   | 0  | 144.346848 | 103.435617 | 0          | 0          | 0  | 0  |
| 11  | 0  | 1167.77441 | 1174.04671 | 1400.33203 | 1239.94078 | 5  | 0  |
| 2   | 0  | 65.883621  | 33.77654   | 0          | 0          | 0  | 0  |
| 22  | 0  | 242.200087 | 119.579012 | 386.518427 | 729.228829 | 0  | 0  |
| 32  | 0  | 582.737369 | 1021.74893 | 148.814184 | 666.125467 | 6  | 0  |
| 6   | 0  | 144.346848 | 103.435617 | 0          | 0          | 0  | 0  |
| 11  | 0  | 1167.77441 | 1174.04671 | 1400.33203 | 1239.94078 | 5  | 0  |
| 2   | 0  | 65.883621  | 33.77654   | 0          | 0          | 0  | 0  |
| 22  | 0  | 242.200087 | 119.579012 | 386.518427 | 729.228829 | 0  | 0  |
| 32  | 0  | 582.737369 | 1021.74893 | 148.814184 | 666.125467 | 6  | 0  |
| 6   | 0  | 286.098931 | 240.852769 | 2.521905   | 3.916561   | 1  | 0  |
| 4   | 0  | 2315.4219  | 1919.10129 | 2266.90287 | 1956.19009 | 3  | 0  |
| 5   | 0  | 416.153787 | 456.618597 | 17.911765  | 40.051923  | 2  | 0  |
| 59  | 0  | 314.396498 | 523.15736  | 316.172827 | 719.416995 | 6  | 0  |
| 31  | 0  | 569.395964 | 955.991817 | 129.235488 | 647.789229 | 4  | 0  |
| 17  | 0  | 417.690044 | 598.520899 | 1.939711   | 4.433706   | 3  | 0  |
| 5   | 0  | 1838.74077 | 1857.46492 | 1782.79752 | 1899.82523 | 3  | 0  |
| 10  | 0  | 281.78567  | 346.003926 | 11.762189  | 28.72248   | 2  | 0  |
| 95  | 0  | 307.227927 | 528.105123 | 280.713288 | 631.656704 | 9  | 0  |
| 60  | 0  | 487.806452 | 799.929009 | 75.254019  | 468.23253  | 10 | 0  |
| 17  | 0  | 417.690044 | 598.520899 | 1.939711   | 4.433706   | 3  | 0  |
| 5   | 0  | 1838.74077 | 1857.46492 | 1782.79752 | 1899.82523 | 3  | 0  |
| 10  | 0  | 281.78567  | 346.003926 | 11.762189  | 28.72248   | 2  | 0  |
| 95  | 6  | 307.227927 | 528.105123 | 280.713288 | 631.656704 | 9  | 1  |
| 60  | 0  | 487.806452 | 799.929009 | 75.254019  | 468.23253  | 10 | 0  |
| 0   | 0  |            |            |            |            | 0  | 0  |
| 59  | 13 | 483.312254 | 678.755717 | 169.35192  | 410.078243 | 31 | 11 |
| 0   | 0  |            |            |            |            | 0  | 0  |
| 6   | 0  | 265.887439 | 233.281116 | 3.72434    | 5.334905   | 1  | 0  |
| 3   | 0  | 181.667639 | 96.143312  | 0          | 0          | 0  | 0  |
| 55  | 0  | 517.330686 | 890.716036 | 159.307162 | 412.280774 | 9  | 0  |
| 3   | 0  | 227.449286 | 75.302191  | 0          | 0          | 0  | 0  |
| 5   | 0  | 297.290927 | 246.229072 | 4.469208   | 5.604935   | 1  | 0  |
| 3   | 0  | 181.667639 | 96.143312  | 0          | 0          | 0  | 0  |
| 55  | 0  | 517.330686 | 890.716036 | 159.307162 | 412.280774 | 9  | 0  |
| 3   | 0  | 227.449286 | 75.302191  | 0          | 0          | 0  | 0  |
| 5   | 0  | 297.290927 | 246.229072 | 4.469208   | 5.604935   | 1  | 0  |
| 13  | 0  | 268.420455 | 261.484396 | 0.506173   | 1.825032   | 2  | 0  |
| 108 | 0  | 432.188232 | 523.744787 | 188.944355 | 539.262231 | 17 | 0  |
| 6   | 0  | 323.513062 | 236.311204 | 0          | 0          | 1  | 0  |
| 6   | 0  | 215.596434 | 240.596712 | 27.351277  | 41.679057  | 1  | 0  |
| 30  | 0  | 264.753115 | 373.599742 | 2.539372   | 8.940912   | 3  | 0  |
| 131 | 0  | 449.36763  | 600.352864 | 183.332449 | 500.154339 | 20 | 0  |
| 8   | 0  | 290.416856 | 209.341688 | 0.248322   | 0.702361   | 1  | 0  |
| 14  | 0  | 203.314983 | 187.720934 | 15.064833  | 29.996954  | 1  | 0  |
| 30  | 0  | 264.753115 | 373.599742 | 2.539372   | 8.940912   | 3  | 0  |
| 131 | 6  | 449.36763  | 600.352864 | 183.332449 | 500.154339 | 20 | 0  |
| 8   | 0  | 290.416856 | 209.341688 | 0.248322   | 0.702361   | 1  | 0  |
| 14  | 0  | 203.314983 | 187.720934 | 15.064833  | 29.996954  | 1  | 0  |
| 1   | 0  | 157.492823 |            | 4.421053   |            | 0  | 0  |
| 3   | 0  | 299.324972 | 117.05307  | 0          | 0          | 1  | 0  |
| 0   | 0  |            |            |            |            | 0  | 0  |
| 2   | 0  | 117.760417 | 101.572943 | 0          | 0          | 0  | 0  |
| 2   | 0  | 507.969396 | 496.191524 | 84.689573  | 113.576094 | 1  | 0  |
| 5   | 0  | 418.829789 | 520.655587 | 0.110448   | 0.246969   | 1  | 0  |
| 0   | 0  |            |            |            |            | 0  | 0  |
| 3   | 0  | 162.199856 | 106.422795 | 0          | 0          | 0  | 0  |
| 2   | 0  | 507.969396 | 496.191524 | 84.689573  | 113.576094 | 1  | 0  |

AnnotatedResults

|     |     |            |            |            |            |    |    |
|-----|-----|------------|------------|------------|------------|----|----|
| 5   | 0   | 418.829789 | 520.655587 | 0.110448   | 0.246969   | 1  | 0  |
| 0   | 0   |            |            |            |            | 0  | 0  |
| 3   | 0   | 162.199856 | 106.422795 | 0          | 0          | 0  | 0  |
| 4   | 0   | 456.556137 | 368.643106 | 120.795761 | 142.609746 | 2  | 0  |
| 7   | 0   | 437.161557 | 480.260658 | 0          | 0          | 2  | 0  |
| 12  | 0   | 379.247803 | 670.895887 | 0.687046   | 2.379996   | 2  | 0  |
| 7   | 0   | 123.069754 | 121.225241 | 19.889822  | 32.444164  | 0  | 0  |
| 9   | 0   | 547.363775 | 816.71967  | 69.557592  | 109.417809 | 3  | 0  |
| 23  | 0   | 238.442042 | 289.010663 | 0          | 0          | 2  | 0  |
| 26  | 0   | 375.932524 | 572.349951 | 8.44453    | 32.532067  | 6  | 0  |
| 25  | 0   | 166.730841 | 126.907822 | 9.084987   | 23.911967  | 0  | 0  |
| 9   | 0   | 547.363775 | 816.71967  | 69.557592  | 109.417809 | 3  | 0  |
| 23  | 0   | 238.442042 | 289.010663 | 0          | 0          | 2  | 0  |
| 26  | 0   | 375.932524 | 572.349951 | 8.44453    | 32.532067  | 6  | 0  |
| 25  | 0   | 166.730841 | 126.907822 | 9.084987   | 23.911967  | 0  | 0  |
| 65  | 7   | 298.502283 | 474.892745 | 41.581005  | 193.146172 | 16 | 0  |
| 69  | 10  | 261.721565 | 329.803511 | 80.63426   | 267.164729 | 16 | 3  |
| 119 | 31  | 325.061442 | 369.337317 | 310.54151  | 652.952403 | 40 | 22 |
| 49  | 14  | 181.054552 | 142.877744 | 36.160331  | 106.340739 | 9  | 3  |
| 275 | 115 | 173.503559 | 183.437364 | 108.224204 | 194.098713 | 33 | 11 |
| 67  | 0   | 272.560066 | 445.860636 | 23.672342  | 103.567014 | 4  | 0  |
| 78  | 0   | 261.070884 | 315.455195 | 64.827628  | 249.845816 | 5  | 0  |
| 121 | 13  | 308.086544 | 360.726012 | 305.321967 | 652.01313  | 16 | 5  |
| 65  | 0   | 186.133225 | 129.262365 | 23.265675  | 64.606605  | 0  | 0  |
| 284 | 0   | 174.538723 | 185.373706 | 109.110251 | 191.478298 | 7  | 0  |
| 67  | 0   | 272.560066 | 445.860636 | 23.672342  | 103.567014 | 4  | 0  |
| 78  | 0   | 261.070884 | 315.455195 | 64.827628  | 249.845816 | 5  | 0  |
| 121 | 21  | 308.086544 | 360.726012 | 305.321967 | 652.01313  | 16 | 5  |
| 65  | 8   | 186.133225 | 129.262365 | 23.265675  | 64.606605  | 0  | 0  |
| 284 | 56  | 174.538723 | 185.373706 | 109.110251 | 191.478298 | 7  | 2  |
| 75  | 0   | 236.369014 | 303.064233 | 14.62609   | 46.948181  | 4  | 0  |
| 85  | 0   | 264.512854 | 381.284586 | 71.281024  | 268.524227 | 7  | 0  |
| 125 | 0   | 279.847508 | 354.957472 | 351.830359 | 795.459001 | 9  | 0  |
| 120 | 0   | 184.698363 | 138.74514  | 32.20227   | 97.659057  | 3  | 0  |
| 204 | 38  | 171.822829 | 169.277622 | 185.634358 | 287.268358 | 4  | 1  |
| 105 | 0   | 233.01391  | 273.788726 | 21.063368  | 81.578827  | 6  | 0  |
| 100 | 0   | 273.454813 | 403.649776 | 76.041429  | 274.28822  | 8  | 0  |
| 147 | 11  | 276.442564 | 337.944302 | 308.707792 | 730.819559 | 11 | 2  |
| 142 | 0   | 196.206327 | 204.489142 | 40.599424  | 126.17546  | 4  | 0  |
| 243 | 45  | 167.628177 | 146.022463 | 155.519798 | 263.16867  | 3  | 1  |
| 105 | 0   | 233.01391  | 273.788726 | 21.063368  | 81.578827  | 6  | 0  |
| 100 | 0   | 273.454813 | 403.649776 | 76.041429  | 274.28822  | 8  | 0  |
| 147 | 11  | 276.442564 | 337.944302 | 308.707792 | 730.819559 | 11 | 2  |
| 142 | 8   | 196.206327 | 204.489142 | 40.599424  | 126.17546  | 4  | 1  |
| 243 | 59  | 167.628177 | 146.022463 | 155.519798 | 263.16867  | 3  | 1  |
| 117 | 39  | 357.419911 | 425.468553 | 7.373836   | 32.652508  | 44 | 16 |
| 129 | 44  | 295.659172 | 388.772358 | 83.074597  | 232.354735 | 38 | 12 |
| 166 | 42  | 449.521207 | 644.611526 | 58.397354  | 248.997556 | 78 | 23 |
| 121 | 46  | 518.135525 | 645.24638  | 179.780038 | 543.458167 | 71 | 28 |
| 123 | 0   | 366.276846 | 427.829534 | 7.004843   | 31.683464  | 19 | 0  |
| 136 | 0   | 307.250615 | 440.109572 | 83.375742  | 230.070983 | 15 | 0  |
| 190 | 10  | 459.011499 | 670.621963 | 43.830553  | 209.377885 | 26 | 7  |
| 179 | 41  | 487.423636 | 559.987776 | 166.576029 | 490.683555 | 39 | 11 |
| 123 | 0   | 366.276846 | 427.829534 | 7.004843   | 31.683464  | 19 | 0  |
| 136 | 9   | 307.250615 | 440.109572 | 83.375742  | 230.070983 | 15 | 1  |
| 190 | 24  | 459.011499 | 670.621963 | 43.830553  | 209.377885 | 26 | 10 |
| 179 | 47  | 487.423636 | 559.987776 | 166.576029 | 490.683555 | 39 | 11 |
| 154 | 0   | 389.904133 | 585.048133 | 10.580745  | 70.041466  | 22 | 0  |

## AnnotatedResults

|     |    |            |            |            |            |     |    |
|-----|----|------------|------------|------------|------------|-----|----|
| 163 | 0  | 269.375919 | 395.448389 | 105.158391 | 273.586834 | 14  | 0  |
| 211 | 22 | 515.409213 | 801.81269  | 104.854917 | 359.94625  | 29  | 10 |
| 175 | 30 | 490.316368 | 633.976587 | 261.689063 | 702.091202 | 37  | 9  |
| 184 | 0  | 342.044967 | 520.814075 | 16.104915  | 76.26519   | 20  | 0  |
| 182 | 0  | 264.133477 | 382.079379 | 97.376446  | 262.168627 | 14  | 0  |
| 261 | 22 | 478.776929 | 739.945213 | 87.947365  | 329.124    | 34  | 10 |
| 224 | 30 | 447.637074 | 575.477585 | 214.364796 | 631.196896 | 38  | 7  |
| 184 | 0  | 342.044967 | 520.814075 | 16.104915  | 76.26519   | 20  | 0  |
| 182 | 14 | 264.133477 | 382.079379 | 97.376446  | 262.168627 | 14  | 2  |
| 261 | 42 | 478.776929 | 739.945213 | 87.947365  | 329.124    | 34  | 13 |
| 224 | 48 | 447.637074 | 575.477585 | 214.364796 | 631.196896 | 38  | 10 |
| 36  | 19 | 501.764221 | 244.66448  | 3.448637   | 13.161743  | 27  | 14 |
| 172 | 62 | 773.076868 | 1149.35603 | 339.419984 | 777.550947 | 100 | 48 |
| 144 | 30 | 435.145    | 325.358    | 58.2083    | 254.624    | 83  | 15 |
| 121 | 36 | 680.10787  | 784.543464 | 247.655094 | 629.403749 | 99  | 33 |
| 57  | 12 | 228.799904 | 221.362699 | 22.248669  | 73.892989  | 13  | 2  |
| 42  | 0  | 463.157807 | 257.736148 | 2.155671   | 10.534364  | 11  | 0  |
| 175 | 21 | 847.504635 | 1216.85228 | 356.979396 | 807.026118 | 42  | 10 |
| 168 | 17 | 478.023101 | 446.114329 | 69.130881  | 260.813625 | 37  | 0  |
| 138 | 0  | 705.850556 | 808.100409 | 234.662849 | 624.439048 | 50  | 0  |
| 66  | 0  | 273.746971 | 388.360891 | 19.03106   | 77.137898  | 3   | 0  |
| 42  | 0  | 463.157807 | 257.736148 | 2.155671   | 10.534364  | 11  | 0  |
| 175 | 29 | 847.504635 | 1216.85228 | 356.979396 | 807.026118 | 42  | 18 |
| 168 | 17 | 478.023101 | 446.114329 | 69.130881  | 260.813625 | 37  | 0  |
| 138 | 0  | 705.850556 | 808.100409 | 234.662849 | 624.439048 | 50  | 0  |
| 66  | 0  | 273.746971 | 388.360891 | 19.03106   | 77.137898  | 3   | 0  |
| 37  | 0  | 447.669541 | 175.999902 | 14.140232  | 45.842196  | 9   | 0  |
| 182 | 14 | 880.59923  | 1261.22664 | 502.15094  | 1070.26453 | 50  | 14 |
| 203 | 19 | 487.636524 | 431.917393 | 101.924732 | 338.292245 | 50  | 0  |
| 127 | 11 | 770.338171 | 890.401244 | 348.787911 | 870.886101 | 52  | 7  |
| 76  | 0  | 241.403122 | 320.668614 | 9.408447   | 42.901657  | 4   | 0  |
| 40  | 0  | 437.865014 | 183.400835 | 13.040811  | 44.045933  | 9   | 0  |
| 216 | 14 | 801.479211 | 1198.66039 | 435.969938 | 1013.76378 | 53  | 14 |
| 241 | 20 | 473.116228 | 421.178235 | 93.40129   | 319.950003 | 58  | 0  |
| 157 | 0  | 700.471399 | 823.355255 | 298.388652 | 800.64678  | 56  | 0  |
| 95  | 0  | 236.191124 | 245.489212 | 17.738764  | 72.893527  | 7   | 0  |
| 40  | 0  | 437.865014 | 183.400835 | 13.040811  | 44.045933  | 9   | 0  |
| 216 | 38 | 801.479211 | 1198.66039 | 435.969938 | 1013.76378 | 53  | 27 |
| 241 | 28 | 473.116228 | 421.178235 | 93.40129   | 319.950003 | 58  | 0  |
| 157 | 7  | 700.471399 | 823.355255 | 298.388652 | 800.64678  | 56  | 7  |
| 95  | 0  | 236.191124 | 245.489212 | 17.738764  | 72.893527  | 7   | 0  |
| 89  | 30 | 931.864579 | 982.027486 | 330.466057 | 699.603446 | 71  | 24 |
| 199 | 80 | 582.144    | 697.158    | 188.061    | 574.268    | 137 | 57 |
| 152 | 43 | 629.202112 | 754.44799  | 260.889737 | 699.651235 | 107 | 33 |
| 53  | 3  | 412.891953 | 675.643758 | 26.043678  | 80.2689    | 19  | 3  |
| 90  | 0  | 895.86589  | 917.585545 | 310.33952  | 674.642727 | 42  | 0  |
| 220 | 26 | 575.199026 | 674.47852  | 169.252745 | 538.296302 | 49  | 8  |
| 169 | 0  | 605.050139 | 706.887417 | 239.621298 | 689.48642  | 48  | 0  |
| 59  | 0  | 392.563058 | 642.186503 | 20.590358  | 74.107792  | 7   | 0  |
| 90  | 7  | 895.86589  | 917.585545 | 310.33952  | 674.642727 | 42  | 3  |
| 220 | 44 | 575.199026 | 674.47852  | 169.252745 | 538.296302 | 49  | 12 |
| 169 | 20 | 605.050139 | 706.887417 | 239.621298 | 689.48642  | 48  | 8  |
| 59  | 0  | 392.563058 | 642.186503 | 20.590358  | 74.107792  | 7   | 0  |
| 103 | 0  | 781.640669 | 802.474485 | 394.553941 | 847.323455 | 43  | 0  |
| 296 | 38 | 540.658786 | 581.440367 | 313.543757 | 814.309453 | 63  | 9  |
| 173 | 0  | 735.339947 | 962.613893 | 314.652993 | 790.307976 | 61  | 0  |
| 111 | 0  | 304.546158 | 382.493526 | 23.694066  | 95.613379  | 14  | 0  |
| 107 | 0  | 771.30944  | 791.908852 | 385.03969  | 825.12768  | 45  | 0  |



AnnotatedResults

|     |    |            |            |            |            |    |    |
|-----|----|------------|------------|------------|------------|----|----|
| 331 | 44 | 521.806978 | 559.550929 | 297.347331 | 795.83     | 70 | 11 |
| 221 | 0  | 671.6815   | 857.888676 | 263.734468 | 734.458706 | 71 | 0  |
| 140 | 0  | 291.82376  | 392.741273 | 18.689961  | 85.643187  | 15 | 0  |
| 107 | 6  | 771.30944  | 791.908852 | 385.03969  | 825.12768  | 45 | 3  |
| 331 | 87 | 521.806978 | 559.550929 | 297.347331 | 795.83     | 70 | 23 |
| 221 | 13 | 671.6815   | 857.888676 | 263.734468 | 734.458706 | 71 | 9  |
| 140 | 6  | 291.82376  | 392.741273 | 18.689961  | 85.643187  | 15 | 2  |
| 82  | 23 | 228.246997 | 208.54986  | 78.866021  | 204.005816 | 18 | 10 |
| 34  | 11 | 636.474426 | 706.441932 | 367.015112 | 656.597732 | 21 | 5  |
| 19  | 0  | 259.614943 | 160.30793  | 29.752899  | 113.51933  | 5  | 0  |
| 108 | 31 | 358.762319 | 686.854486 | 213.28897  | 481.925358 | 23 | 8  |
| 86  | 25 | 292.225254 | 355.954607 | 40.006718  | 111.3196   | 26 | 12 |
| 116 | 25 | 270.491072 | 337.651114 | 101.749684 | 233.973529 | 10 | 6  |
| 50  | 0  | 531.572695 | 587.33702  | 345.890735 | 624.606523 | 10 | 0  |
| 24  | 0  | 312.040898 | 193.455374 | 28.66851   | 101.627167 | 3  | 0  |
| 134 | 12 | 332.400081 | 646.097686 | 285.39169  | 555.484077 | 11 | 0  |
| 111 | 16 | 364.612095 | 529.013058 | 39.67948   | 84.861434  | 16 | 5  |
| 116 | 25 | 270.491072 | 337.651114 | 101.749684 | 233.973529 | 10 | 6  |
| 50  | 7  | 531.572695 | 587.33702  | 345.890735 | 624.606523 | 10 | 0  |
| 24  | 0  | 312.040898 | 193.455374 | 28.66851   | 101.627167 | 3  | 0  |
| 134 | 21 | 332.400081 | 646.097686 | 285.39169  | 555.484077 | 11 | 0  |
| 111 | 25 | 364.612095 | 529.013058 | 39.67948   | 84.861434  | 16 | 5  |
| 76  | 11 | 262.936728 | 354.267862 | 185.934842 | 426.819506 | 4  | 3  |
| 34  | 0  | 638.497686 | 922.115043 | 482.536495 | 895.24861  | 5  | 0  |
| 36  | 0  | 409.903543 | 784.277557 | 46.714603  | 113.746125 | 4  | 0  |
| 132 | 10 | 295.816209 | 596.151349 | 281.586141 | 638.422908 | 11 | 0  |
| 154 | 28 | 387.362217 | 512.747703 | 61.613666  | 116.705316 | 26 | 9  |
| 100 | 0  | 252.04046  | 324.739397 | 149.980263 | 371.468303 | 7  | 0  |
| 58  | 0  | 559.502348 | 780.727622 | 362.319567 | 742.406391 | 8  | 0  |
| 53  | 0  | 370.758681 | 658.529999 | 36.543057  | 106.664458 | 6  | 0  |
| 142 | 10 | 317.815849 | 676.671972 | 263.227916 | 619.661628 | 13 | 0  |
| 196 | 30 | 378.967992 | 495.128296 | 54.679787  | 111.404397 | 32 | 10 |
| 100 | 9  | 252.04046  | 324.739397 | 149.980263 | 371.468303 | 7  | 3  |
| 58  | 6  | 559.502348 | 780.727622 | 362.319567 | 742.406391 | 8  | 0  |
| 53  | 0  | 370.758681 | 658.529999 | 36.543057  | 106.664458 | 6  | 0  |
| 142 | 31 | 317.815849 | 676.671972 | 263.227916 | 619.661628 | 13 | 0  |
| 196 | 38 | 378.967992 | 495.128296 | 54.679787  | 111.404397 | 32 | 17 |
| 17  | 5  | 418.168415 | 534.673031 | 296.183749 | 696.836237 | 7  | 1  |
| 80  | 35 | 335.138844 | 422.35085  | 191.68118  | 523.408338 | 28 | 13 |
| 0   | 0  |            |            |            |            | 0  | 0  |
| 11  | 0  | 393.083071 | 326.827752 | 45.622091  | 84.986088  | 7  | 0  |
| 26  | 0  | 424.166608 | 465.472372 | 321.185807 | 671.725524 | 2  | 0  |
| 99  | 0  | 383.519981 | 459.779269 | 174.732163 | 477.518    | 7  | 0  |
| 1   | 0  | 174.579439 |            | 0          |            | 0  | 0  |
| 13  | 0  | 339.00686  | 318.162432 | 74.462175  | 133.364118 | 3  | 0  |
| 26  | 0  | 424.166608 | 465.472372 | 321.185807 | 671.725524 | 2  | 0  |
| 99  | 14 | 383.519981 | 459.779269 | 174.732163 | 477.518    | 7  | 0  |
| 1   | 0  | 174.579439 |            | 0          |            | 0  | 0  |
| 13  | 0  | 339.00686  | 318.162432 | 74.462175  | 133.364118 | 3  | 0  |
| 48  | 0  | 457.638575 | 732.130784 | 167.485319 | 487.577075 | 5  | 0  |
| 122 | 21 | 696.667967 | 1219.99356 | 261.287873 | 654.43691  | 22 | 10 |
| 2   | 0  | 119.656319 | 130.927037 | 23.153846  | 32.744483  | 0  | 0  |
| 47  | 0  | 226.087271 | 197.982353 | 36.466278  | 83.50236   | 3  | 0  |
| 67  | 0  | 510.586538 | 733.377697 | 148.256302 | 471.112718 | 11 | 0  |
| 137 | 23 | 634.347531 | 1112.88354 | 279.70898  | 664.226511 | 24 | 12 |
| 11  | 0  | 129.583333 | 72.274647  | 56.862851  | 171.849503 | 0  | 0  |
| 72  | 0  | 249.565941 | 271.024134 | 38.79901   | 86.194664  | 4  | 0  |
| 67  | 0  | 510.586538 | 733.377697 | 148.256302 | 471.112718 | 11 | 0  |

AnnotatedResults

|     |    |            |            |            |            |     |    |
|-----|----|------------|------------|------------|------------|-----|----|
| 137 | 30 | 634.347531 | 1112.88354 | 279.70898  | 664.226511 | 24  | 12 |
| 11  | 0  | 129.583333 | 72.274647  | 56.862851  | 171.849503 | 0   | 0  |
| 72  | 0  | 249.565941 | 271.024134 | 38.79901   | 86.194664  | 4   | 0  |
| 175 | 69 | 794.485434 | 799.98633  | 285.216012 | 619.138471 | 145 | 68 |
| 155 | 46 | 406.823299 | 372.58656  | 331.725724 | 801.787453 | 101 | 37 |
| 118 | 32 | 434.054694 | 436.422374 | 130.7767   | 399.467779 | 70  | 22 |
| 75  | 19 | 326.535342 | 453.79866  | 52.548639  | 139.273907 | 25  | 10 |
| 17  | 0  | 186.824111 | 91.076585  | 39.89674   | 80.291509  | 2   | 0  |
| 196 | 15 | 783.937065 | 785.203298 | 315.971881 | 657.539518 | 82  | 12 |
| 175 | 0  | 413.572727 | 342.466182 | 325.59562  | 784.097763 | 22  | 0  |
| 160 | 14 | 446.005509 | 450.678081 | 119.312768 | 401.322967 | 26  | 1  |
| 75  | 0  | 397.047385 | 771.116849 | 72.10334   | 257.388294 | 9   | 0  |
| 25  | 0  | 289.435237 | 438.083111 | 37.758752  | 90.572002  | 2   | 0  |
| 196 | 29 | 783.937065 | 785.203298 | 315.971881 | 657.539518 | 82  | 18 |
| 175 | 16 | 413.572727 | 342.466182 | 325.59562  | 784.097763 | 22  | 4  |
| 160 | 14 | 446.005509 | 450.678081 | 119.312768 | 401.322967 | 26  | 1  |
| 75  | 6  | 397.047385 | 771.116849 | 72.10334   | 257.388294 | 9   | 1  |
| 25  | 0  | 289.435237 | 438.083111 | 37.758752  | 90.572002  | 2   | 0  |
| 237 | 28 | 793.934137 | 782.930376 | 548.713835 | 965.619575 | 105 | 24 |
| 192 | 11 | 418.062252 | 356.619996 | 373.001468 | 928.535697 | 27  | 1  |
| 174 | 17 | 389.103664 | 278.162719 | 158.354496 | 576.554602 | 19  | 2  |
| 82  | 0  | 318.675329 | 431.412656 | 39.194157  | 121.035522 | 8   | 0  |
| 42  | 0  | 386.57786  | 718.021152 | 73.934551  | 145.760441 | 4   | 0  |
| 277 | 29 | 747.387141 | 776.236133 | 511.600152 | 946.82874  | 113 | 23 |
| 229 | 11 | 401.082489 | 348.724103 | 319.374872 | 855.86636  | 32  | 1  |
| 203 | 19 | 367.855171 | 269.420566 | 142.058053 | 541.963222 | 22  | 2  |
| 93  | 0  | 327.611509 | 450.463818 | 50.134335  | 148.679474 | 11  | 0  |
| 59  | 0  | 356.181981 | 640.763055 | 59.729229  | 127.840121 | 6   | 0  |
| 277 | 69 | 747.387141 | 776.236133 | 511.600152 | 946.82874  | 113 | 46 |
| 229 | 19 | 401.082489 | 348.724103 | 319.374872 | 855.86636  | 32  | 6  |
| 203 | 34 | 367.855171 | 269.420566 | 142.058053 | 541.963222 | 22  | 4  |
| 93  | 15 | 327.611509 | 450.463818 | 50.134335  | 148.679474 | 11  | 2  |
| 59  | 0  | 356.181981 | 640.763055 | 59.729229  | 127.840121 | 6   | 0  |
| 0   | 0  |            |            |            |            | 0   | 0  |
| 10  | 5  | 426.313464 | 400.528374 | 171.766905 | 153.51304  | 6   | 2  |
| 1   | 0  | 247.569378 |            | 0          |            | 0   | 0  |
| 17  | 0  | 342.477446 | 314.971407 | 225.723246 | 390.867399 | 2   | 0  |
| 1   | 0  | 247.569378 |            | 0          |            | 0   | 0  |
| 17  | 0  | 342.477446 | 314.971407 | 225.723246 | 390.867399 | 2   | 0  |
| 2   | 0  | 428.304024 | 203.910041 | 1.043328   | 1.475488   | 0   | 0  |
| 7   | 0  | 383.985031 | 278.130523 | 202.507649 | 366.559038 | 1   | 0  |
| 5   | 0  | 592.251559 | 253.960048 | 32.675961  | 48.83334   | 3   | 0  |
| 12  | 0  | 342.320644 | 238.392721 | 265.637224 | 643.775858 | 2   | 0  |
| 5   | 0  | 592.251559 | 253.960048 | 32.675961  | 48.83334   | 3   | 0  |
| 12  | 0  | 342.320644 | 238.392721 | 265.637224 | 643.775858 | 2   | 0  |
| 10  | 0  | 194.358618 | 114.095468 | 52.054839  | 113.599882 | 2   | 0  |
| 9   | 0  | 368.496297 | 461.892014 | 13.958042  | 41.874126  | 2   | 0  |
| 8   | 0  | 809.038805 | 1299.50118 | 78.298458  | 116.824632 | 3   | 0  |
| 80  | 26 | 342.382584 | 523.438026 | 30.206589  | 95.821866  | 27  | 7  |
| 15  | 0  | 185.949242 | 70.633832  | 139.67369  | 261.233844 | 0   | 0  |
| 12  | 0  | 220.600398 | 162.752646 | 10.632911  | 36.833486  | 1   | 0  |
| 6   | 0  | 856.314579 | 1533.21033 | 24.523936  | 49.200353  | 1   | 0  |
| 87  | 0  | 334.022849 | 525.428612 | 28.479609  | 95.869832  | 8   | 0  |
| 15  | 0  | 185.949242 | 70.633832  | 139.67369  | 261.233844 | 0   | 0  |
| 12  | 0  | 220.600398 | 162.752646 | 10.632911  | 36.833486  | 1   | 0  |
| 6   | 0  | 856.314579 | 1533.21033 | 24.523936  | 49.200353  | 1   | 0  |
| 87  | 0  | 334.022849 | 525.428612 | 28.479609  | 95.869832  | 8   | 0  |
| 10  | 0  | 304.143785 | 227.357301 | 42.934427  | 100.288252 | 1   | 0  |

AnnotatedResults

|     |    |            |            |            |            |     |    |
|-----|----|------------|------------|------------|------------|-----|----|
| 19  | 0  | 449.898465 | 458.285397 | 12.558942  | 41.470985  | 4   | 0  |
| 14  | 0  | 238.324345 | 130.950489 | 15.054012  | 46.205023  | 1   | 0  |
| 139 | 0  | 307.665218 | 412.057755 | 33.0835    | 107.944484 | 16  | 0  |
| 21  | 0  | 340.612029 | 398.845318 | 62.902969  | 177.811389 | 2   | 0  |
| 45  | 0  | 313.890689 | 330.658164 | 10.853738  | 37.539587  | 5   | 0  |
| 21  | 0  | 246.44061  | 154.526252 | 40.661034  | 106.594655 | 2   | 0  |
| 161 | 0  | 337.85462  | 538.978053 | 26.599446  | 90.554025  | 20  | 0  |
| 21  | 0  | 340.612029 | 398.845318 | 62.902969  | 177.811389 | 2   | 0  |
| 45  | 0  | 313.890689 | 330.658164 | 10.853738  | 37.539587  | 5   | 0  |
| 21  | 0  | 246.44061  | 154.526252 | 40.661034  | 106.594655 | 2   | 0  |
| 161 | 0  | 337.85462  | 538.978053 | 26.599446  | 90.554025  | 20  | 0  |
| 137 | 48 | 760.695    | 627.349    | 233.409    | 483.673    | 114 | 41 |
| 77  | 18 | 480.998692 | 370.912426 | 127.66354  | 340.291793 | 58  | 16 |
| 2   | 0  | 955.292494 | 1265.53933 | 0          | 0          | 1   | 0  |
| 135 | 20 | 428.128627 | 497.099754 | 239.018278 | 593.144645 | 66  | 15 |
| 20  | 2  | 218.732936 | 177.160041 | 0.584346   | 1.43256    | 5   | 0  |
| 150 | 23 | 763.403255 | 644.907351 | 212.277569 | 476.618133 | 76  | 14 |
| 84  | 0  | 482.735442 | 370.245625 | 127.967114 | 329.563233 | 19  | 0  |
| 11  | 0  | 333.841821 | 507.5953   | 7.214804   | 21.469966  | 1   | 0  |
| 169 | 0  | 424.200944 | 454.11559  | 208.802971 | 553.500323 | 26  | 0  |
| 24  | 0  | 301.91     | 369.581    | 10.3097    | 43.1474    | 3   | 0  |
| 150 | 29 | 763.403255 | 644.907351 | 212.277569 | 476.618133 | 76  | 15 |
| 84  | 0  | 482.735442 | 370.245625 | 127.967114 | 329.563233 | 19  | 0  |
| 11  | 0  | 333.841821 | 507.5953   | 7.214804   | 21.469966  | 1   | 0  |
| 169 | 0  | 424.200944 | 454.11559  | 208.802971 | 553.500323 | 26  | 0  |
| 24  | 0  | 301.909625 | 369.5809   | 10.309723  | 43.147362  | 3   | 0  |
| 162 | 25 | 712.999669 | 581.914332 | 328.727816 | 676.423182 | 79  | 16 |
| 114 | 0  | 516.159341 | 506.159394 | 179.499036 | 468.59823  | 27  | 0  |
| 36  | 0  | 375.519929 | 632.882052 | 132.059809 | 347.263857 | 4   | 0  |
| 186 | 0  | 401.728454 | 453.948256 | 213.585906 | 605.503617 | 30  | 0  |
| 41  | 0  | 317.695731 | 465.923035 | 20.906219  | 56.767981  | 6   | 0  |
| 181 | 26 | 727.359998 | 629.737912 | 305.100278 | 651.317112 | 86  | 16 |
| 130 | 0  | 488.744619 | 476.512706 | 143.552359 | 415.661651 | 30  | 0  |
| 57  | 0  | 294.897964 | 529.209059 | 89.310503  | 281.918265 | 5   | 0  |
| 217 | 0  | 432.134273 | 576.741785 | 196.278223 | 575.007835 | 37  | 0  |
| 57  | 0  | 304.176306 | 422.534327 | 22.524511  | 68.006458  | 7   | 0  |
| 181 | 34 | 727.359998 | 629.737912 | 305.100278 | 651.317112 | 86  | 21 |
| 130 | 16 | 488.744619 | 476.512706 | 143.552359 | 415.661651 | 30  | 2  |
| 57  | 0  | 294.897964 | 529.209059 | 89.310503  | 281.918265 | 5   | 0  |
| 217 | 0  | 432.134273 | 576.741785 | 196.278223 | 575.007835 | 37  | 0  |
| 57  | 0  | 304.176306 | 422.534327 | 22.524511  | 68.006458  | 7   | 0  |
| 90  | 21 | 348.488    | 563.538    | 25.4419    | 98.3787    | 29  | 11 |
| 26  | 2  | 205.266958 | 144.563326 | 91.833533  | 298.142856 | 3   | 0  |
| 6   | 0  | 193.45402  | 105.556732 | 0          | 0          | 2   | 0  |
| 5   | 0  | 198.875064 | 195.093782 | 11.277778  | 25.217878  | 1   | 0  |
| 94  | 0  | 319.83751  | 456.704595 | 28.62749   | 88.498334  | 4   | 0  |
| 30  | 0  | 220.132432 | 195.232426 | 77.032588  | 261.014571 | 2   | 0  |
| 7   | 0  | 205.1437   | 95.218221  | 0          | 0          | 0   | 0  |
| 7   | 0  | 154.608712 | 181.172394 | 21.357967  | 37.985351  | 0   | 0  |
| 94  | 0  | 319.83751  | 456.704595 | 28.62749   | 88.498334  | 4   | 0  |
| 30  | 0  | 220.132432 | 195.232426 | 77.032588  | 261.014571 | 2   | 0  |
| 7   | 0  | 205.1437   | 95.218221  | 0          | 0          | 0   | 0  |
| 7   | 0  | 154.608712 | 181.172394 | 21.357967  | 37.985351  | 0   | 0  |
| 66  | 0  | 308.306684 | 460.626107 | 35.79331   | 96.648999  | 4   | 0  |
| 15  | 0  | 422.583847 | 807.015558 | 9.758847   | 25.188946  | 2   | 0  |
| 7   | 0  | 178.910569 | 113.869678 | 3.545455   | 9.380391   | 0   | 0  |
| 11  | 0  | 196.103055 | 234.327399 | 60.235495  | 149.317792 | 1   | 0  |
| 89  | 0  | 428.345941 | 777.490017 | 44.531433  | 137.814645 | 10  | 0  |

AnnotatedResults

|    |    |            |            |            |            |    |   |
|----|----|------------|------------|------------|------------|----|---|
| 35 | 0  | 273.145701 | 544.693408 | 41.116594  | 115.860082 | 3  | 0 |
| 10 | 0  | 163.361526 | 99.77474   | 2.481818   | 7.848198   | 0  | 0 |
| 17 | 0  | 136.855345 | 91.91368   | 100.289134 | 338.632591 | 0  | 0 |
| 89 | 0  | 428.345941 | 777.490017 | 44.531433  | 137.814645 | 10 | 0 |
| 35 | 0  | 273.145701 | 544.693408 | 41.116594  | 115.860082 | 3  | 0 |
| 10 | 0  | 163.361526 | 99.77474   | 2.481818   | 7.848198   | 0  | 0 |
| 17 | 0  | 136.855345 | 91.91368   | 100.289134 | 338.632591 | 0  | 0 |
| 5  | 0  | 452.004984 | 252.734232 | 304.452895 | 644.337368 | 3  | 0 |
| 21 | 6  | 363.133453 | 758.931619 | 25.444283  | 58.204141  | 3  | 0 |
| 16 | 0  | 179.303014 | 123.303176 | 72.252152  | 256.387991 | 2  | 0 |
| 12 | 2  | 466.074363 | 146.869493 | 1154.89027 | 1162.1757  | 11 | 2 |
| 8  | 0  | 416.854282 | 368.335859 | 26.605519  | 74.264954  | 4  | 0 |
| 22 | 0  | 763.679672 | 1110.4705  | 104.993404 | 296.218132 | 5  | 0 |
| 26 | 0  | 339.986663 | 684.294909 | 21.789339  | 64.195416  | 2  | 0 |
| 18 | 0  | 211.373216 | 172.201704 | 53.212922  | 169.578014 | 1  | 0 |
| 14 | 0  | 400.6228   | 172.301937 | 701.329244 | 1039.03517 | 3  | 0 |
| 11 | 0  | 621.207842 | 897.508765 | 93.208702  | 237.813126 | 2  | 0 |
| 22 | 0  | 763.679672 | 1110.4705  | 104.993404 | 296.218132 | 5  | 0 |
| 26 | 0  | 339.986663 | 684.294909 | 21.789339  | 64.195416  | 2  | 0 |
| 18 | 0  | 211.373216 | 172.201704 | 53.212922  | 169.578014 | 1  | 0 |
| 14 | 0  | 400.6228   | 172.301937 | 701.329244 | 1039.03517 | 3  | 0 |
| 11 | 0  | 621.207842 | 897.508765 | 93.208702  | 237.813126 | 2  | 0 |
| 25 | 0  | 322.563242 | 135.457285 | 132.416467 | 458.797465 | 1  | 0 |
| 49 | 0  | 322.101849 | 617.391533 | 64.576777  | 175.858791 | 4  | 0 |
| 4  | 0  | 946.317065 | 1734.17273 | 52.606189  | 69.371872  | 1  | 0 |
| 4  | 0  | 168.72934  | 170.042209 | 64.821429  | 129.642857 | 0  | 0 |
| 10 | 0  | 627.344318 | 1226.26882 | 206.77526  | 626.299876 | 2  | 0 |
| 59 | 0  | 359.614209 | 219.033988 | 111.315071 | 401.300098 | 7  | 0 |
| 75 | 0  | 352.659808 | 716.709157 | 64.927281  | 166.003243 | 7  | 0 |
| 12 | 0  | 441.855974 | 983.366514 | 18.940073  | 44.1811    | 1  | 0 |
| 14 | 0  | 662.3968   | 1324.33763 | 245.429391 | 495.707412 | 2  | 0 |
| 16 | 0  | 507.595435 | 965.267321 | 130.36778  | 495.726832 | 2  | 0 |
| 59 | 0  | 359.614209 | 219.033988 | 111.315071 | 401.300098 | 7  | 0 |
| 75 | 6  | 352.659808 | 716.709157 | 64.927281  | 166.003243 | 7  | 0 |
| 12 | 0  | 441.855974 | 983.366514 | 18.940073  | 44.1811    | 1  | 0 |
| 14 | 0  | 662.3968   | 1324.33763 | 245.429391 | 495.707412 | 2  | 0 |
| 16 | 0  | 507.595435 | 965.267321 | 130.36778  | 495.726832 | 2  | 0 |
| 45 | 0  | 423.738485 | 555.785687 | 27.79425   | 72.401383  | 15 | 0 |
| 43 | 13 | 655.387102 | 652.728908 | 88.462607  | 194.335766 | 26 | 8 |
| 20 | 0  | 342.318355 | 440.07704  | 7.992165   | 27.942209  | 7  | 0 |
| 38 | 3  | 477.034482 | 804.068484 | 147.143371 | 452.777391 | 18 | 0 |
| 0  | 0  |            |            |            |            | 0  | 0 |
| 62 | 0  | 403.409569 | 490.030876 | 20.994691  | 64.836     | 10 | 0 |
| 60 | 0  | 693.829533 | 628.44771  | 119.123715 | 335.428557 | 24 | 0 |
| 31 | 0  | 349.141329 | 446.306418 | 63.203867  | 218.011321 | 5  | 0 |
| 39 | 0  | 401.197995 | 565.990348 | 146.094823 | 443.095137 | 4  | 0 |
| 4  | 0  | 844.863082 | 1379.70223 | 6.567164   | 13.134328  | 1  | 0 |
| 62 | 0  | 403.409569 | 490.030876 | 20.994691  | 64.836     | 10 | 0 |
| 60 | 0  | 693.829533 | 628.44771  | 119.123715 | 335.428557 | 24 | 0 |
| 31 | 0  | 349.141329 | 446.306418 | 63.203867  | 218.011321 | 5  | 0 |
| 39 | 0  | 401.197995 | 565.990348 | 146.094823 | 443.095137 | 4  | 0 |
| 4  | 0  | 844.863082 | 1379.70223 | 6.567164   | 13.134328  | 1  | 0 |
| 20 | 0  | 492.167702 | 520.120865 | 88.934506  | 169.146231 | 6  | 0 |
| 22 | 0  | 1042.20908 | 1166.22599 | 18.227098  | 53.457827  | 10 | 0 |
| 29 | 0  | 383.964791 | 433.346445 | 29.709767  | 141.489067 | 6  | 0 |
| 15 | 0  | 954.786398 | 1359.27813 | 646.751349 | 1087.50572 | 5  | 0 |
| 15 | 0  | 258.249258 | 329.855355 | 20.729352  | 65.489995  | 1  | 0 |
| 36 | 0  | 468.845323 | 483.331489 | 58.35062   | 137.193776 | 9  | 0 |

AnnotatedResults

|    |    |            |            |            |            |    |    |
|----|----|------------|------------|------------|------------|----|----|
| 66 | 0  | 976.411611 | 850.650025 | 17.168639  | 53.184797  | 36 | 0  |
| 52 | 0  | 352.670005 | 391.6835   | 17.973441  | 106.599786 | 11 | 0  |
| 29 | 0  | 726.287535 | 1103.11762 | 505.155494 | 932.977562 | 6  | 0  |
| 27 | 0  | 248.081666 | 257.718932 | 13.521066  | 49.430176  | 1  | 0  |
| 36 | 0  | 468.845323 | 483.331489 | 58.35062   | 137.193776 | 9  | 0  |
| 66 | 0  | 976.411611 | 850.650025 | 17.168639  | 53.184797  | 36 | 0  |
| 52 | 0  | 352.670005 | 391.6835   | 17.973441  | 106.599786 | 11 | 0  |
| 29 | 0  | 726.287535 | 1103.11762 | 505.155494 | 932.977562 | 6  | 0  |
| 27 | 0  | 248.081666 | 257.718932 | 13.521066  | 49.430176  | 1  | 0  |
| 15 | 2  | 473.780684 | 242.140586 | 392.857978 | 838.54829  | 11 | 2  |
| 18 | 0  | 408.422367 | 458.050176 | 336.351496 | 621.011498 | 11 | 0  |
| 49 | 4  | 296.11907  | 484.187805 | 116.036576 | 480.936215 | 8  | 0  |
| 16 | 0  | 432.518491 | 208.131692 | 560.381018 | 903.440601 | 4  | 0  |
| 27 | 0  | 673.708081 | 928.318031 | 443.757098 | 588.860099 | 8  | 0  |
| 57 | 0  | 279.527424 | 459.951952 | 101.021588 | 444.775143 | 5  | 0  |
| 16 | 0  | 432.518491 | 208.131692 | 560.381018 | 903.440601 | 4  | 0  |
| 27 | 0  | 673.708081 | 928.318031 | 443.757098 | 588.860099 | 8  | 0  |
| 57 | 0  | 279.527424 | 459.951952 | 101.021588 | 444.775143 | 5  | 0  |
| 1  | 0  | 196.039604 |            | 0          |            | 0  | 0  |
| 15 | 0  | 645.315239 | 1031.30998 | 414.397704 | 514.162517 | 4  | 0  |
| 33 | 0  | 194.581794 | 225.795401 | 38.12723   | 148.511765 | 1  | 0  |
| 2  | 0  | 158.557996 | 53.006998  | 0.572917   | 0.810227   | 0  | 0  |
| 49 | 0  | 578.127437 | 666.603963 | 289.340972 | 584.400697 | 16 | 0  |
| 65 | 0  | 206.699116 | 292.012119 | 25.819173  | 109.650485 | 2  | 0  |
| 2  | 0  | 158.557996 | 53.006998  | 0.572917   | 0.810227   | 0  | 0  |
| 49 | 0  | 578.127437 | 666.603963 | 289.340972 | 584.400697 | 16 | 0  |
| 65 | 0  | 206.699116 | 292.012119 | 25.819173  | 109.650485 | 2  | 0  |
| 68 | 0  | 422.374764 | 465.903481 | 36.307616  | 164.008949 | 28 | 0  |
| 75 | 15 | 586.966646 | 685.542497 | 125.90152  | 360.093355 | 50 | 10 |
| 12 | 0  | 279.247117 | 302.431043 | 2.444143   | 6.488855   | 3  | 0  |
| 7  | 0  | 904.043418 | 1380.93461 | 243.342616 | 437.327431 | 2  | 0  |
| 77 | 0  | 393.078062 | 444.95812  | 31.424214  | 154.347782 | 15 | 0  |
| 99 | 0  | 594.511122 | 630.098407 | 157.758086 | 450.58984  | 31 | 0  |
| 22 | 0  | 222.487782 | 241.576381 | 12.24345   | 47.587151  | 1  | 0  |
| 22 | 0  | 356.232081 | 338.060753 | 85.984112  | 302.745726 | 4  | 0  |
| 77 | 0  | 393.078062 | 444.95812  | 31.424214  | 154.347782 | 15 | 0  |
| 99 | 0  | 594.511122 | 630.098407 | 157.758086 | 450.58984  | 31 | 0  |
| 22 | 0  | 222.487782 | 241.576381 | 12.24345   | 47.587151  | 1  | 0  |
| 22 | 0  | 356.232081 | 338.060753 | 85.984112  | 302.745726 | 4  | 0  |
| 54 | 0  | 489.053463 | 715.390781 | 14.007562  | 61.853717  | 9  | 0  |
| 54 | 0  | 597.440622 | 917.425597 | 232.305801 | 552.632151 | 7  | 0  |
| 7  | 0  | 178.945708 | 135.525981 | 97.799766  | 173.324475 | 0  | 0  |
| 4  | 0  | 1759.85013 | 1816.14793 | 0          | 0          | 2  | 0  |
| 74 | 0  | 436.849345 | 631.234359 | 10.601252  | 53.10456   | 9  | 0  |
| 93 | 0  | 518.875912 | 756.127473 | 157.992987 | 464.834174 | 12 | 0  |
| 11 | 0  | 157.488841 | 121.702866 | 63.658774  | 147.000856 | 0  | 0  |
| 11 | 0  | 761.961414 | 1272.65956 | 44.042954  | 140.451297 | 2  | 0  |
| 74 | 0  | 436.849345 | 631.234359 | 10.601252  | 53.10456   | 9  | 0  |
| 93 | 0  | 518.875912 | 756.127473 | 157.992987 | 464.834174 | 12 | 0  |
| 11 | 0  | 157.488841 | 121.702866 | 63.658774  | 147.000856 | 0  | 0  |
| 11 | 0  | 761.961414 | 1272.65956 | 44.042954  | 140.451297 | 2  | 0  |
| 65 | 28 | 700.047166 | 1008.55178 | 578.598734 | 779.488364 | 40 | 21 |
| 17 | 0  | 129.272902 | 86.648268  | 0          | 0          | 1  | 0  |
| 14 | 0  | 392.439641 | 586.434252 | 44.926209  | 134.777896 | 7  | 0  |
| 22 | 0  | 328.153579 | 667.228793 | 3.914418   | 13.539699  | 4  | 0  |
| 14 | 2  | 435.046026 | 279.614839 | 25.04933   | 68.38745   | 10 | 2  |
| 75 | 11 | 731.964312 | 1033.96173 | 536.048498 | 778.439387 | 17 | 10 |
| 16 | 0  | 166.713556 | 101.113669 | 0          | 0          | 0  | 0  |

AnnotatedResults

|     |    |            |            |            |            |    |    |
|-----|----|------------|------------|------------|------------|----|----|
| 15  | 0  | 360.653935 | 531.352467 | 46.685084  | 125.562031 | 1  | 0  |
| 37  | 0  | 254.283526 | 523.324886 | 5.488516   | 20.719546  | 1  | 0  |
| 17  | 0  | 607.163396 | 728.812191 | 20.62886   | 62.424544  | 3  | 0  |
| 75  | 19 | 731.964312 | 1033.96173 | 536.048498 | 778.439387 | 17 | 11 |
| 16  | 0  | 166.713556 | 101.113669 | 0          | 0          | 0  | 0  |
| 15  | 0  | 360.653935 | 531.352467 | 46.685084  | 125.562031 | 1  | 0  |
| 37  | 0  | 254.283526 | 523.324886 | 5.488516   | 20.719546  | 1  | 0  |
| 17  | 0  | 607.163396 | 728.812191 | 20.62886   | 62.424544  | 3  | 0  |
| 92  | 14 | 851.724016 | 970.036135 | 720.623878 | 1003.06934 | 29 | 12 |
| 23  | 0  | 293.595912 | 623.540654 | 150.396705 | 638.549234 | 2  | 0  |
| 55  | 0  | 247.724098 | 298.280585 | 13.238111  | 32.016807  | 4  | 0  |
| 60  | 0  | 312.370978 | 485.21355  | 20.204989  | 86.512599  | 4  | 0  |
| 11  | 0  | 732.210918 | 607.135415 | 31.877172  | 67.106719  | 5  | 0  |
| 109 | 14 | 815.194244 | 943.638542 | 610.007891 | 943.230888 | 38 | 12 |
| 35  | 0  | 239.396119 | 508.781565 | 98.507308  | 518.790313 | 2  | 0  |
| 75  | 0  | 246.602377 | 270.801938 | 14.346683  | 39.489773  | 5  | 0  |
| 86  | 0  | 319.430713 | 515.275489 | 16.866624  | 76.542406  | 7  | 0  |
| 18  | 0  | 658.535332 | 545.093132 | 14.451195  | 48.716493  | 7  | 0  |
| 109 | 21 | 815.194244 | 943.638542 | 610.007891 | 943.230888 | 38 | 14 |
| 35  | 0  | 239.396119 | 508.781565 | 98.507308  | 518.790313 | 2  | 0  |
| 75  | 0  | 246.602377 | 270.801938 | 14.346683  | 39.489773  | 5  | 0  |
| 86  | 0  | 319.430713 | 515.275489 | 16.866624  | 76.542406  | 7  | 0  |
| 18  | 0  | 658.535332 | 545.093132 | 14.451195  | 48.716493  | 7  | 0  |
| 16  | 3  | 211.288347 | 186.931526 | 2.278571   | 7.601557   | 3  | 2  |
| 78  | 9  | 318.358609 | 549.585297 | 41.534008  | 174.650515 | 23 | 0  |
| 18  | 5  | 495.288944 | 669.395202 | 172.825986 | 709.568897 | 5  | 1  |
| 24  | 5  | 290.328864 | 366.973635 | 31.239356  | 92.577552  | 5  | 1  |
| 31  | 0  | 248.770435 | 237.242494 | 43.925864  | 145.760821 | 3  | 0  |
| 91  | 0  | 303.009092 | 489.49373  | 40.008682  | 164.665297 | 9  | 0  |
| 21  | 0  | 428.92904  | 627.723555 | 150.438796 | 658.407757 | 5  | 0  |
| 31  | 0  | 268.476758 | 326.112819 | 23.428057  | 79.400286  | 2  | 0  |
| 31  | 0  | 248.770435 | 237.242494 | 43.925864  | 145.760821 | 3  | 0  |
| 91  | 0  | 303.009092 | 489.49373  | 40.008682  | 164.665297 | 9  | 0  |
| 21  | 0  | 428.92904  | 627.723555 | 150.438796 | 658.407757 | 5  | 0  |
| 31  | 0  | 268.476758 | 326.112819 | 23.428057  | 79.400286  | 2  | 0  |
| 74  | 0  | 302.127363 | 410.097531 | 30.031347  | 91.441369  | 8  | 0  |
| 47  | 0  | 287.255832 | 250.117428 | 19.555755  | 65.635885  | 5  | 0  |
| 16  | 0  | 420.75133  | 756.606989 | 35.00937   | 58.922642  | 2  | 0  |
| 42  | 0  | 306.617181 | 425.538333 | 44.160023  | 128.320462 | 3  | 0  |
| 98  | 0  | 280.600285 | 375.814768 | 31.043759  | 89.810888  | 9  | 0  |
| 72  | 0  | 284.055836 | 265.572176 | 27.320963  | 110.208183 | 8  | 0  |
| 19  | 0  | 378.21507  | 698.727372 | 31.223885  | 54.90375   | 2  | 0  |
| 59  | 0  | 332.106819 | 486.625902 | 54.835981  | 139.472299 | 7  | 0  |
| 98  | 0  | 280.600285 | 375.814768 | 31.043759  | 89.810888  | 9  | 0  |
| 72  | 0  | 284.055836 | 265.572176 | 27.320963  | 110.208183 | 8  | 0  |
| 19  | 0  | 378.21507  | 698.727372 | 31.223885  | 54.90375   | 2  | 0  |
| 59  | 0  | 332.106819 | 486.625902 | 54.835981  | 139.472299 | 7  | 0  |
| 35  | 7  | 992.223508 | 1125.06326 | 187.271199 | 638.814344 | 27 | 6  |
| 220 | 44 | 310.727708 | 594.729085 | 84.914876  | 204.87333  | 52 | 5  |
| 154 | 31 | 227.175658 | 382.47708  | 96.885334  | 178.355913 | 26 | 5  |
| 203 | 55 | 552.34795  | 904.463292 | 307.103354 | 540.658094 | 77 | 31 |
| 156 | 52 | 558.293692 | 650.762844 | 489.153708 | 735.231807 | 89 | 35 |
| 50  | 0  | 789.819557 | 991.179439 | 131.538146 | 541.077806 | 15 | 0  |
| 245 | 10 | 279.14809  | 488.897876 | 87.235056  | 205.926354 | 17 | 0  |
| 153 | 0  | 242.28037  | 399.631694 | 99.217454  | 180.053315 | 10 | 0  |
| 246 | 11 | 517.87668  | 842.826359 | 267.18358  | 524.973736 | 35 | 11 |
| 194 | 17 | 639.378707 | 937.192656 | 375.538006 | 675.968281 | 45 | 0  |
| 50  | 0  | 789.819557 | 991.179439 | 131.538146 | 541.077806 | 15 | 0  |

AnnotatedResults

|     |    |            |            |            |            |    |    |
|-----|----|------------|------------|------------|------------|----|----|
| 245 | 16 | 279.14809  | 488.897876 | 87.235056  | 205.926354 | 17 | 0  |
| 153 | 15 | 242.28037  | 399.631694 | 99.217454  | 180.053315 | 10 | 0  |
| 246 | 25 | 517.87668  | 842.826359 | 267.18358  | 524.973736 | 35 | 13 |
| 194 | 17 | 639.378707 | 937.192656 | 375.538006 | 675.968281 | 45 | 0  |
| 85  | 14 | 962.849104 | 1155.24586 | 199.525449 | 689.254655 | 27 | 14 |
| 237 | 15 | 341.082294 | 661.194924 | 121.442976 | 255.158783 | 20 | 0  |
| 155 | 18 | 243.081861 | 381.428225 | 116.711034 | 204.38359  | 13 | 0  |
| 250 | 18 | 572.435896 | 902.986215 | 381.85186  | 721.199453 | 44 | 18 |
| 199 | 20 | 521.807365 | 857.379088 | 405.313622 | 780.598473 | 38 | 0  |
| 95  | 15 | 933.093893 | 1140.42487 | 191.725434 | 655.820711 | 31 | 15 |
| 277 | 15 | 343.869542 | 671.66293  | 115.483173 | 251.832216 | 25 | 0  |
| 200 | 20 | 240.616707 | 418.939239 | 97.524713  | 190.381666 | 14 | 0  |
| 317 | 18 | 504.339185 | 822.559162 | 315.872147 | 662.867739 | 52 | 18 |
| 256 | 20 | 485.500538 | 796.072192 | 332.173476 | 712.61471  | 43 | 0  |
| 95  | 15 | 933.093893 | 1140.42487 | 191.725434 | 655.820711 | 31 | 15 |
| 277 | 22 | 343.869542 | 671.66293  | 115.483173 | 251.832216 | 25 | 3  |
| 200 | 20 | 240.616707 | 418.939239 | 97.524713  | 190.381666 | 14 | 0  |
| 317 | 36 | 504.339185 | 822.559162 | 315.872147 | 662.867739 | 52 | 19 |
| 256 | 20 | 485.500538 | 796.072192 | 332.173476 | 712.61471  | 43 | 0  |
| 59  | 2  | 257.822698 | 306.427899 | 22.084337  | 116.941232 | 14 | 0  |
| 105 | 16 | 325.721739 | 327.991441 | 67.961364  | 316.185858 | 39 | 5  |
| 55  | 5  | 236.713065 | 170.190884 | 18.84124   | 108.450884 | 13 | 3  |
| 19  | 0  | 411.072894 | 719.667935 | 3.038167   | 9.949123   | 6  | 0  |
| 59  | 0  | 242.63478  | 233.176388 | 25.236654  | 119.66514  | 2  | 0  |
| 111 | 0  | 321.582172 | 415.46529  | 64.937832  | 310.187228 | 13 | 0  |
| 60  | 0  | 247.798631 | 191.687547 | 19.56316   | 104.498064 | 3  | 0  |
| 18  | 0  | 348.419981 | 728.732037 | 3.007407   | 9.434657   | 1  | 0  |
| 59  | 0  | 242.63478  | 233.176388 | 25.236654  | 119.66514  | 2  | 0  |
| 111 | 0  | 321.582172 | 415.46529  | 64.937832  | 310.187228 | 13 | 0  |
| 60  | 0  | 247.798631 | 191.687547 | 19.56316   | 104.498064 | 3  | 0  |
| 18  | 0  | 348.419981 | 728.732037 | 3.007407   | 9.434657   | 1  | 0  |
| 35  | 0  | 308.642795 | 338.849576 | 2.904928   | 12.238731  | 5  | 0  |
| 163 | 0  | 325.342193 | 349.848221 | 61.124066  | 325.361183 | 21 | 0  |
| 107 | 0  | 219.060821 | 169.921524 | 19.654766  | 107.305994 | 3  | 0  |
| 48  | 0  | 391.624795 | 722.912536 | 9.017832   | 33.981298  | 6  | 0  |
| 51  | 0  | 276.659667 | 296.708979 | 7.296311   | 24.317663  | 5  | 0  |
| 221 | 0  | 325.010898 | 455.529353 | 50.433     | 284.842595 | 28 | 0  |
| 124 | 0  | 212.020348 | 197.624163 | 27.118573  | 135.876141 | 4  | 0  |
| 70  | 0  | 324.969977 | 573.523652 | 9.490761   | 38.5077    | 7  | 0  |
| 51  | 0  | 276.659667 | 296.708979 | 7.296311   | 24.317663  | 5  | 0  |
| 221 | 0  | 325.010898 | 455.529353 | 50.433     | 284.842595 | 28 | 0  |
| 124 | 0  | 212.020348 | 197.624163 | 27.118573  | 135.876141 | 4  | 0  |
| 70  | 0  | 324.969977 | 573.523652 | 9.490761   | 38.5077    | 7  | 0  |
| 44  | 2  | 604.265712 | 830.297905 | 7.789042   | 30.924751  | 25 | 0  |
| 135 | 24 | 332.253206 | 504.247709 | 19.523966  | 74.455662  | 35 | 2  |
| 26  | 2  | 835.646724 | 716.717768 | 21.649152  | 57.421192  | 17 | 1  |
| 51  | 0  | 645.220473 | 900.018953 | 11.916935  | 35.898459  | 16 | 0  |
| 153 | 0  | 294.633926 | 462.681946 | 16.629276  | 69.548874  | 13 | 0  |
| 28  | 0  | 693.075031 | 619.174682 | 33.324958  | 80.606539  | 13 | 0  |
| 51  | 0  | 645.220473 | 900.018953 | 11.916935  | 35.898459  | 16 | 0  |
| 153 | 0  | 294.633926 | 462.681946 | 16.629276  | 69.548874  | 13 | 0  |
| 28  | 0  | 693.075031 | 619.174682 | 33.324958  | 80.606539  | 13 | 0  |
| 59  | 0  | 614.366904 | 694.085037 | 29.270536  | 112.373565 | 20 | 0  |
| 171 | 0  | 262.21612  | 347.734283 | 23.715659  | 90.953183  | 12 | 0  |
| 36  | 0  | 1130.31417 | 827.332018 | 34.586475  | 85.043862  | 22 | 0  |
| 69  | 0  | 588.449199 | 667.853227 | 40.697529  | 141.311592 | 21 | 0  |
| 206 | 0  | 251.360534 | 321.33202  | 19.816802  | 82.644795  | 14 | 0  |
| 36  | 0  | 1130.31417 | 827.332018 | 34.586475  | 85.043862  | 22 | 0  |

AnnotatedResults

|       |    |            |            |            |            |    |    |
|-------|----|------------|------------|------------|------------|----|----|
| 69    | 0  | 588.449199 | 667.853227 | 40.697529  | 141.311592 | 21 | 0  |
| 206   | 0  | 251.360534 | 321.33202  | 19.816802  | 82.644795  | 14 | 0  |
| 36    | 0  | 1130.31417 | 827.332018 | 34.586475  | 85.043862  | 22 | 0  |
| 06502 |    |            |            |            |            |    |    |
| 8     | 0  | 689.438788 | 1405.31848 | 10.087805  | 28.532621  | 3  | 0  |
| 17    | 0  | 320.021568 | 285.696153 | 7.853413   | 32.380451  | 6  | 0  |
| 06502 |    |            |            |            |            |    |    |
| 15    | 0  | 545.332778 | 1050.94349 | 14.501624  | 39.712057  | 2  | 0  |
| 29    | 0  | 286.858767 | 232.515516 | 7.944821   | 26.697785  | 4  | 0  |
| 06502 |    |            |            |            |            |    |    |
| 15    | 0  | 545.332778 | 1050.94349 | 14.501624  | 39.712057  | 2  | 0  |
| 29    | 0  | 286.858767 | 232.515516 | 7.944821   | 26.697785  | 4  | 0  |
| 1     | 0  | 119.165354 |            | 0          |            | 0  | 0  |
| 57    | 0  | 313.823752 | 400.15527  | 135.555186 | 317.798366 | 3  | 0  |
| 31    | 0  | 316.266554 | 307.397944 | 42.581142  | 142.106608 | 5  | 0  |
| 2     | 0  | 70.131549  | 69.344272  | 33.37594   | 47.200707  | 0  | 0  |
| 82    | 0  | 293.494262 | 358.980227 | 127.43503  | 292.928735 | 6  | 0  |
| 51    | 0  | 329.637597 | 303.652036 | 29.515259  | 111.431708 | 8  | 0  |
| 2     | 0  | 70.131549  | 69.344272  | 33.37594   | 47.200707  | 0  | 0  |
| 82    | 14 | 293.494262 | 358.980227 | 127.43503  | 292.928735 | 6  | 0  |
| 51    | 0  | 329.637597 | 303.652036 | 29.515259  | 111.431708 | 8  | 0  |
| 2     | 0  | 474.50007  | 58.760672  | 0          | 0          | 2  | 0  |
| 4     | 0  | 85.567639  | 54.370313  | 353.6      | 707.2      | 0  | 0  |
| 46    | 8  | 236.066    | 378.662    | 29.9892    | 93.2009    | 9  | 2  |
| 295   | 35 | 257.555943 | 372.122413 | 30.518131  | 125.274394 | 51 | 13 |
| 1     | 0  | 439.060241 |            | 0          |            | 0  | 0  |
| 8     | 0  | 103.595545 | 41.731475  | 228.562821 | 500.582602 | 0  | 0  |
| 51    | 0  | 200.485953 | 318.691247 | 25.045702  | 80.872439  | 1  | 0  |
| 331   | 0  | 261.292872 | 380.96009  | 30.475562  | 123.7475   | 19 | 0  |
| 1     | 0  | 439.060241 |            | 0          |            | 0  | 0  |
| 8     | 0  | 103.595545 | 41.731475  | 228.562821 | 500.582602 | 0  | 0  |
| 51    | 0  | 200.485953 | 318.691247 | 25.045702  | 80.872439  | 1  | 0  |
| 331   | 0  | 261.292872 | 380.96009  | 30.475562  | 123.7475   | 19 | 0  |
| 6     | 0  | 481.837878 | 219.326182 | 1473.70691 | 1581.68422 | 3  | 0  |
| 9     | 0  | 131.31239  | 67.152127  | 229.375507 | 688.126521 | 0  | 0  |
| 44    | 0  | 244.795533 | 323.329297 | 90.108974  | 297.469765 | 1  | 0  |
| 47    | 0  | 216.104375 | 142.628829 | 58.016142  | 204.627918 | 1  | 0  |
| 12    | 0  | 418.675585 | 257.538571 | 792.043064 | 1236.56765 | 5  | 0  |
| 30    | 0  | 350.818911 | 582.091319 | 90.195826  | 386.386342 | 4  | 0  |
| 86    | 0  | 254.37205  | 380.216552 | 73.419193  | 261.732414 | 5  | 0  |
| 97    | 0  | 242.240787 | 304.004075 | 42.855948  | 159.583989 | 8  | 0  |
| 12    | 0  | 418.675585 | 257.538571 | 792.043064 | 1236.56765 | 5  | 0  |
| 30    | 0  | 350.818911 | 582.091319 | 90.195826  | 386.386342 | 4  | 0  |
| 86    | 0  | 254.37205  | 380.216552 | 73.419193  | 261.732414 | 5  | 0  |
| 97    | 0  | 242.240787 | 304.004075 | 42.855948  | 159.583989 | 8  | 0  |
| 75    | 17 | 369.462459 | 476.858885 | 95.12445   | 254.145943 | 30 | 10 |
| 156   | 12 | 299.639976 | 343.445536 | 75.105621  | 257.119016 | 43 | 1  |
| 84    | 9  | 1015.281   | 533.389195 | 9.752728   | 51.196659  | 79 | 8  |
| 84    | 16 | 158.402393 | 223.318884 | 119.703009 | 294.72657  | 8  | 1  |
| 85    | 10 | 292.026059 | 380.654267 | 89.447106  | 243.657054 | 10 | 4  |
| 161   | 0  | 302.522757 | 332.252731 | 76.246123  | 260.746839 | 18 | 0  |
| 84    | 0  | 993.248125 | 486.305153 | 3.746087   | 19.17348   | 66 | 0  |
| 72    | 0  | 180.603931 | 257.869563 | 104.976765 | 243.104983 | 4  | 0  |
| 85    | 10 | 292.026059 | 380.654267 | 89.447106  | 243.657054 | 10 | 4  |
| 161   | 0  | 302.522757 | 332.252731 | 76.246123  | 260.746839 | 18 | 0  |
| 84    | 0  | 993.248125 | 486.305153 | 3.746087   | 19.17348   | 66 | 0  |
| 72    | 0  | 180.603931 | 257.869563 | 104.976765 | 243.104983 | 4  | 0  |
| 40    | 0  | 321.413586 | 442.712334 | 99.635308  | 210.489541 | 5  | 0  |



AnnotatedResults

|     |     |            |            |            |            |     |    |
|-----|-----|------------|------------|------------|------------|-----|----|
| 176 | 0   | 261.461165 | 215.754399 | 65.291873  | 291.201531 | 13  | 0  |
| 58  | 0   | 1009.9929  | 695.432568 | 144.449557 | 281.49601  | 37  | 0  |
| 174 | 10  | 121.036431 | 174.68686  | 116.531207 | 259.71382  | 4   | 0  |
| 60  | 0   | 300.35039  | 388.678465 | 77.54604   | 191.409158 | 6   | 0  |
| 220 | 0   | 266.578895 | 238.442129 | 58.007104  | 262.81157  | 16  | 0  |
| 119 | 0   | 1121.23836 | 742.653299 | 76.074266  | 194.574174 | 90  | 0  |
| 229 | 10  | 136.356683 | 250.632182 | 97.463302  | 233.08056  | 8   | 0  |
| 60  | 0   | 300.35039  | 388.678465 | 77.54604   | 191.409158 | 6   | 0  |
| 220 | 0   | 266.578895 | 238.442129 | 58.007104  | 262.81157  | 16  | 0  |
| 119 | 7   | 1121.23836 | 742.653299 | 76.074266  | 194.574174 | 90  | 1  |
| 229 | 18  | 136.356683 | 250.632182 | 97.463302  | 233.08056  | 8   | 0  |
| 166 | 49  | 344.436794 | 691.586244 | 29.419631  | 79.69337   | 31  | 2  |
| 213 | 57  | 316.962622 | 558.433115 | 49.541766  | 153.762071 | 51  | 14 |
| 168 | 58  | 280.530378 | 513.281525 | 18.511007  | 56.733657  | 33  | 13 |
| 39  | 22  | 391.62158  | 222.852543 | 19.179344  | 90.729463  | 23  | 17 |
| 274 | 109 | 949.199542 | 1200.70105 | 299.217882 | 761.823399 | 191 | 93 |
| 176 | 0   | 333.829841 | 706.646363 | 38.169047  | 97.722449  | 20  | 0  |
| 259 | 0   | 262.920928 | 393.443996 | 39.25325   | 128.505065 | 21  | 0  |
| 171 | 0   | 251.90024  | 369.792259 | 22.464667  | 72.081017  | 12  | 0  |
| 50  | 14  | 479.156932 | 355.716111 | 20.354456  | 83.405042  | 11  | 3  |
| 295 | 22  | 878.643478 | 1156.44115 | 253.877471 | 697.272132 | 108 | 21 |
| 176 | 0   | 333.829841 | 706.646363 | 38.169047  | 97.722449  | 20  | 0  |
| 259 | 0   | 262.920928 | 393.443996 | 39.25325   | 128.505065 | 21  | 0  |
| 171 | 7   | 251.90024  | 369.792259 | 22.464667  | 72.081017  | 12  | 2  |
| 50  | 14  | 479.156932 | 355.716111 | 20.354456  | 83.405042  | 11  | 3  |
| 295 | 52  | 878.643478 | 1156.44115 | 253.877471 | 697.272132 | 108 | 42 |
| 176 | 0   | 265.578184 | 455.046541 | 24.484569  | 77.611087  | 18  | 0  |
| 231 | 0   | 305.578751 | 560.891339 | 61.163526  | 183.426896 | 22  | 0  |
| 195 | 0   | 315.682676 | 512.351888 | 29.24089   | 90.19491   | 21  | 0  |
| 57  | 13  | 338.91636  | 223.851658 | 8.074666   | 31.07339   | 5   | 0  |
| 135 | 0   | 956.785954 | 1369.85218 | 256.490368 | 646.944065 | 53  | 0  |
| 231 | 0   | 250.272605 | 421.122545 | 34.485395  | 113.607025 | 21  | 0  |
| 296 | 0   | 312.5788   | 585.74113  | 54.463556  | 167.279649 | 28  | 0  |
| 242 | 0   | 310.112198 | 497.459741 | 31.378688  | 110.731505 | 26  | 0  |
| 62  | 15  | 345.527735 | 219.353044 | 9.266093   | 31.916909  | 7   | 1  |
| 174 | 0   | 927.134547 | 1338.35862 | 213.513014 | 593.526702 | 63  | 0  |
| 231 | 0   | 250.272605 | 421.122545 | 34.485395  | 113.607025 | 21  | 0  |
| 296 | 8   | 312.5788   | 585.74113  | 54.463556  | 167.279649 | 28  | 1  |
| 242 | 14  | 310.112198 | 497.459741 | 31.378688  | 110.731505 | 26  | 1  |
| 62  | 21  | 345.527735 | 219.353044 | 9.266093   | 31.916909  | 7   | 2  |
| 174 | 13  | 927.134547 | 1338.35862 | 213.513014 | 593.526702 | 63  | 4  |
| 66  | 5   | 293.134229 | 334.738952 | 58.344041  | 243.473471 | 19  | 2  |
| 35  | 13  | 1059.8942  | 1648.87002 | 240.894727 | 505.746416 | 15  | 9  |
| 1   | 0   | 129.042105 |            | 133.357895 |            | 0   | 0  |
| 2   | 0   | 160.52381  | 78.522524  | 0          | 0          | 0   | 0  |
| 41  | 13  | 224.293    | 240.299    | 47.4028    | 152.407    | 9   | 3  |
| 67  | 0   | 258.672334 | 292.326616 | 38.276252  | 195.690397 | 6   | 0  |
| 63  | 0   | 904.131973 | 1474.60754 | 207.436444 | 446.844242 | 12  | 0  |
| 6   | 0   | 197.278    | 142.54     | 41.2943    | 65.5618    | 0   | 0  |
| 1   | 0   | 109.451613 |            | 0          |            | 0   | 0  |
| 41  | 0   | 222.644639 | 221.517842 | 48.02133   | 155.428336 | 2   | 0  |
| 67  | 0   | 258.672334 | 292.326616 | 38.276252  | 195.690397 | 6   | 0  |
| 63  | 0   | 904.131973 | 1474.60754 | 207.436444 | 446.844242 | 12  | 0  |
| 6   | 0   | 197.27758  | 142.54015  | 41.294259  | 65.561803  | 0   | 0  |
| 1   | 0   | 109.451613 |            | 0          |            | 0   | 0  |
| 41  | 0   | 222.644639 | 221.517842 | 48.02133   | 155.428336 | 2   | 0  |
| 54  | 0   | 283.040634 | 380.837137 | 79.865267  | 304.72905  | 4   | 0  |
| 25  | 0   | 578.744032 | 920.167844 | 137.983668 | 316.145162 | 3   | 0  |

### AnnotatedResults

|     |     |            |            |            |            |     |    |
|-----|-----|------------|------------|------------|------------|-----|----|
| 8   | 0   | 486.900373 | 631.039901 | 60.154967  | 151.151651 | 2   | 0  |
| 12  | 0   | 403.467769 | 815.331768 | 17.940244  | 43.345815  | 1   | 0  |
| 51  | 0   | 243.994016 | 223.613348 | 71.685668  | 226.116608 | 4   | 0  |
| 72  | 0   | 260.77256  | 362.544513 | 72.813697  | 284.12697  | 5   | 0  |
| 47  | 0   | 691.793637 | 1018.94448 | 122.001076 | 310.71339  | 10  | 0  |
| 18  | 0   | 373.036217 | 481.469535 | 46.240416  | 109.943102 | 3   | 0  |
| 24  | 0   | 435.817866 | 773.361221 | 27.873009  | 89.936286  | 4   | 0  |
| 71  | 0   | 261.931283 | 344.395938 | 56.816061  | 195.73198  | 6   | 0  |
| 72  | 0   | 260.77256  | 362.544513 | 72.813697  | 284.12697  | 5   | 0  |
| 47  | 0   | 691.793637 | 1018.94448 | 122.001076 | 310.71339  | 10  | 0  |
| 18  | 0   | 373.036217 | 481.469535 | 46.240416  | 109.943102 | 3   | 0  |
| 24  | 0   | 435.817866 | 773.361221 | 27.873009  | 89.936286  | 4   | 0  |
| 71  | 0   | 261.931283 | 344.395938 | 56.816061  | 195.73198  | 6   | 0  |
| 5   | 5   | 151.159806 | 33.956391  | 1.650372   | 1.853543   | 0   | 0  |
| 232 | 72  | 517.597076 | 713.634601 | 407.93899  | 837.248686 | 111 | 51 |
| 574 | 216 | 289.806    | 548.279    | 246.655    | 405.65     | 107 | 34 |
| 227 | 101 | 337.47736  | 741.647907 | 179.093944 | 497.70052  | 45  | 18 |
| 11  | 0   | 539.984    | 1263.61    | 113.87     | 248.25     | 1   | 0  |
| 281 | 50  | 541.940817 | 716.823754 | 457.304066 | 894.128795 | 47  | 16 |
| 612 | 129 | 279.002977 | 528.005628 | 243.169484 | 407.21574  | 49  | 10 |
| 264 | 19  | 323.335472 | 697.807677 | 192.511463 | 526.56692  | 25  | 5  |
| 11  | 0   | 539.984159 | 1263.61462 | 113.869959 | 248.249518 | 1   | 0  |
| 281 | 73  | 541.940817 | 716.823754 | 457.304066 | 894.128795 | 47  | 30 |
| 612 | 158 | 279.002977 | 528.005628 | 243.169484 | 407.21574  | 49  | 10 |
| 264 | 34  | 323.335472 | 697.807677 | 192.511463 | 526.56692  | 25  | 6  |
| 7   | 0   | 101.363724 | 49.478925  | 44.575098  | 109.99139  | 0   | 0  |
| 374 | 72  | 545.381886 | 785.727341 | 458.749309 | 974.632937 | 64  | 30 |
| 575 | 119 | 295.195032 | 545.789808 | 337.19797  | 574.819801 | 49  | 5  |
| 154 | 0   | 264.609754 | 551.931946 | 186.535999 | 334.883031 | 11  | 0  |
| 22  | 0   | 285.883575 | 400.145668 | 36.500953  | 90.24309   | 2   | 0  |
| 453 | 68  | 516.027187 | 773.545681 | 398.508742 | 879.904382 | 73  | 22 |
| 664 | 170 | 290.40597  | 538.552703 | 307.496822 | 549.786568 | 57  | 12 |
| 196 | 0   | 321.8813   | 663.276854 | 159.734156 | 296.068633 | 19  | 0  |
| 22  | 0   | 285.883575 | 400.145668 | 36.500953  | 90.24309   | 2   | 0  |
| 453 | 102 | 516.027187 | 773.545681 | 398.508742 | 879.904382 | 73  | 39 |
| 664 | 202 | 290.40597  | 538.552703 | 307.496822 | 549.786568 | 57  | 13 |
| 196 | 9   | 321.8813   | 663.276854 | 159.734156 | 296.068633 | 19  | 1  |
| 70  | 8   | 251.523102 | 406.515089 | 34.298732  | 79.067514  | 12  | 0  |
| 133 | 29  | 548.11942  | 710.723375 | 171.121269 | 520.086863 | 76  | 18 |
| 20  | 7   | 1197.23294 | 1450.11428 | 229.817115 | 559.623937 | 16  | 6  |
| 48  | 8   | 390.029012 | 840.848125 | 55.566196  | 101.054424 | 14  | 2  |
| 90  | 22  | 177.501369 | 177.941687 | 99.31428   | 212.769065 | 13  | 3  |
| 77  | 0   | 251.85277  | 391.697184 | 32.335186  | 76.017357  | 3   | 0  |
| 173 | 0   | 555.790512 | 775.302886 | 224.412169 | 660.697142 | 30  | 0  |
| 31  | 0   | 917.540552 | 1223.34016 | 278.294529 | 635.00015  | 11  | 0  |
| 64  | 0   | 362.270356 | 761.3423   | 66.417867  | 124.585795 | 9   | 0  |
| 133 | 16  | 193.569707 | 372.943908 | 99.55542   | 210.732842 | 3   | 0  |
| 77  | 0   | 251.85277  | 391.697184 | 32.335186  | 76.017357  | 3   | 0  |
| 173 | 15  | 555.790512 | 775.302886 | 224.412169 | 660.697142 | 30  | 0  |
| 31  | 0   | 917.540552 | 1223.34016 | 278.294529 | 635.00015  | 11  | 0  |
| 64  | 0   | 362.270356 | 761.3423   | 66.417867  | 124.585795 | 9   | 0  |
| 133 | 23  | 193.569707 | 372.943908 | 99.55542   | 210.732842 | 3   | 0  |
| 130 | 0   | 283.618144 | 393.80144  | 27.459588  | 73.95707   | 9   | 0  |
| 165 | 0   | 528.278594 | 707.928191 | 304.889458 | 769.134527 | 31  | 0  |
| 68  | 0   | 927.807053 | 1301.01314 | 219.20067  | 566.313792 | 16  | 0  |
| 84  | 0   | 424.464404 | 818.892713 | 46.295893  | 93.817359  | 13  | 0  |
| 161 | 24  | 221.750266 | 415.283592 | 157.945377 | 312.074925 | 5   | 1  |
| 189 | 0   | 309.31202  | 418.855367 | 24.745524  | 68.797834  | 19  | 0  |

## AnnotatedResults

|     |    |            |            |            |            |     |    |
|-----|----|------------|------------|------------|------------|-----|----|
| 214 | 0  | 503.540692 | 688.981735 | 231.679591 | 650.563536 | 37  | 0  |
| 82  | 0  | 825.774054 | 1211.55693 | 185.167294 | 521.391165 | 18  | 0  |
| 124 | 0  | 346.246124 | 538.229159 | 43.281083  | 92.486332  | 18  | 0  |
| 197 | 24 | 219.695629 | 391.86228  | 140.59447  | 288.409566 | 7   | 1  |
| 189 | 0  | 309.31202  | 418.855367 | 24.745524  | 68.797834  | 19  | 0  |
| 214 | 15 | 503.540692 | 688.981735 | 231.679591 | 650.563536 | 37  | 9  |
| 82  | 15 | 825.774054 | 1211.55693 | 185.167294 | 521.391165 | 18  | 8  |
| 124 | 0  | 346.246124 | 538.229159 | 43.281083  | 92.486332  | 18  | 0  |
| 197 | 24 | 219.695629 | 391.86228  | 140.59447  | 288.409566 | 7   | 1  |
| 27  | 6  | 864.983424 | 1230.17543 | 247.584188 | 610.457987 | 18  | 6  |
| 8   | 0  | 196.303598 | 137.361968 | 1.100067   | 3.111459   | 1   | 0  |
| 3   | 0  | 79.01601   | 32.620491  | 0          | 0          | 0   | 0  |
| 1   | 0  | 3739.6129  |            | 0          |            | 1   | 0  |
| 33  | 0  | 977.211049 | 1400.49295 | 266.577076 | 618.504951 | 11  | 0  |
| 16  | 0  | 185.368075 | 126.019133 | 0          | 0          | 0   | 0  |
| 1   | 0  | 111.692308 |            | 0          |            | 0   | 0  |
| 7   | 0  | 1545.77499 | 1699.58094 | 7.902072   | 19.749186  | 3   | 0  |
| 33  | 0  | 977.211049 | 1400.49295 | 266.577076 | 618.504951 | 11  | 0  |
| 16  | 0  | 185.368075 | 126.019133 | 0          | 0          | 0   | 0  |
| 1   | 0  | 111.692308 |            | 0          |            | 0   | 0  |
| 7   | 0  | 1545.77499 | 1699.58094 | 7.902072   | 19.749186  | 3   | 0  |
| 31  | 0  | 702.594314 | 878.195952 | 199.017803 | 501.013413 | 8   | 0  |
| 25  | 0  | 353.725902 | 806.566951 | 5.984219   | 29.287986  | 2   | 0  |
| 6   | 0  | 130.298068 | 98.706895  | 41.283763  | 96.961399  | 0   | 0  |
| 7   | 0  | 831.103197 | 1360.16863 | 11.377947  | 24.578489  | 2   | 0  |
| 48  | 0  | 589.397534 | 777.736548 | 144.586753 | 412.88903  | 11  | 0  |
| 52  | 0  | 458.965134 | 879.740867 | 17.566126  | 87.205264  | 6   | 0  |
| 12  | 0  | 150.739045 | 84.172934  | 20.641882  | 68.834857  | 0   | 0  |
| 16  | 0  | 988.855766 | 1603.91217 | 43.626908  | 101.491034 | 4   | 0  |
| 48  | 0  | 589.397534 | 777.736548 | 144.586753 | 412.88903  | 11  | 0  |
| 52  | 0  | 458.965134 | 879.740867 | 17.566126  | 87.205264  | 6   | 0  |
| 12  | 0  | 150.739045 | 84.172934  | 20.641882  | 68.834857  | 0   | 0  |
| 16  | 0  | 988.855766 | 1603.91217 | 43.626908  | 101.491034 | 4   | 0  |
| 181 | 89 | 634.023585 | 955.831776 | 452.18171  | 677.078202 | 88  | 48 |
| 163 | 71 | 579.585037 | 848.501105 | 358.118654 | 702.875126 | 90  | 44 |
| 130 | 34 | 270.539526 | 419.098618 | 43.39167   | 123.526148 | 30  | 12 |
| 123 | 43 | 522.747405 | 760.615953 | 281.391146 | 572.771248 | 60  | 29 |
| 68  | 11 | 237.11164  | 376.003581 | 48.142891  | 94.64464   | 13  | 1  |
| 165 | 60 | 564.216551 | 612.830467 | 382.379785 | 837.364729 | 118 | 48 |
| 74  | 16 | 572.179698 | 585.98852  | 267.49002  | 757.183138 | 52  | 11 |
| 59  | 14 | 574.43568  | 645.60866  | 182.047128 | 444.079239 | 37  | 10 |
| 122 | 33 | 624.437    | 719.071    | 251.683    | 588.78     | 74  | 19 |
| 205 | 53 | 641.257131 | 1006.01745 | 443.382864 | 682.359328 | 35  | 14 |
| 201 | 0  | 579.677831 | 855.571076 | 369.610816 | 690.141374 | 43  | 0  |
| 148 | 0  | 247.927556 | 387.672149 | 35.999074  | 107.914365 | 8   | 0  |
| 156 | 0  | 540.889686 | 818.434495 | 323.256794 | 626.574153 | 27  | 0  |
| 77  | 0  | 194.556094 | 221.705009 | 53.864771  | 116.020105 | 5   | 0  |
| 186 | 0  | 564.284372 | 641.274721 | 403.953582 | 872.342017 | 49  | 0  |
| 95  | 0  | 554.667753 | 595.412222 | 205.520688 | 634.293172 | 26  | 0  |
| 58  | 0  | 585.296643 | 654.563278 | 186.217431 | 447.666261 | 12  | 0  |
| 126 | 0  | 612.166526 | 694.754129 | 243.635391 | 579.787087 | 31  | 0  |
| 205 | 53 | 641.257131 | 1006.01745 | 443.382864 | 682.359328 | 35  | 14 |
| 201 | 19 | 579.677831 | 855.571076 | 369.610816 | 690.141374 | 43  | 7  |
| 148 | 12 | 247.927556 | 387.672149 | 35.999074  | 107.914365 | 8   | 1  |
| 156 | 12 | 540.889686 | 818.434495 | 323.256794 | 626.574153 | 27  | 3  |
| 77  | 0  | 194.556094 | 221.705009 | 53.864771  | 116.020105 | 5   | 0  |
| 186 | 13 | 564.284372 | 641.274721 | 403.953582 | 872.342017 | 49  | 8  |
| 95  | 12 | 554.667753 | 595.412222 | 205.520688 | 634.293172 | 26  | 7  |

## AnnotatedResults

|     |    |            |            |            |            |    |    |
|-----|----|------------|------------|------------|------------|----|----|
| 58  | 0  | 585.296643 | 654.563278 | 186.217431 | 447.666261 | 12 | 0  |
| 126 | 0  | 612.166526 | 694.754129 | 243.635391 | 579.787087 | 31 | 0  |
| 154 | 26 | 607.159504 | 964.169163 | 526.339277 | 870.095553 | 22 | 0  |
| 179 | 0  | 558.115035 | 807.993171 | 434.161026 | 812.350992 | 33 | 0  |
| 151 | 0  | 260.716993 | 410.51825  | 61.540404  | 188.123184 | 14 | 0  |
| 161 | 11 | 569.054297 | 837.5903   | 519.836246 | 914.502847 | 29 | 4  |
| 85  | 0  | 213.049021 | 259.88894  | 66.974351  | 177.146409 | 5  | 0  |
| 175 | 0  | 528.264308 | 614.940493 | 416.992031 | 917.11836  | 38 | 0  |
| 74  | 0  | 524.371708 | 575.291317 | 249.169326 | 781.260162 | 16 | 0  |
| 61  | 0  | 623.383007 | 574.916985 | 306.80789  | 719.791433 | 20 | 0  |
| 154 | 0  | 550.608899 | 622.744665 | 283.062271 | 655.565036 | 35 | 0  |
| 181 | 27 | 613.47732  | 968.286529 | 501.996204 | 858.59871  | 30 | 0  |
| 214 | 0  | 537.233072 | 793.529338 | 383.04352  | 763.136877 | 39 | 0  |
| 198 | 0  | 241.30899  | 371.919226 | 62.485323  | 188.572112 | 16 | 0  |
| 188 | 11 | 525.703174 | 777.597308 | 464.55451  | 872.964331 | 30 | 4  |
| 109 | 0  | 237.926432 | 400.5709   | 55.523461  | 160.883069 | 8  | 0  |
| 219 | 0  | 530.097478 | 621.683489 | 362.415073 | 854.906605 | 45 | 0  |
| 98  | 0  | 482.915904 | 509.923028 | 173.768423 | 663.640563 | 18 | 0  |
| 73  | 0  | 621.120659 | 562.009957 | 281.498548 | 689.284016 | 25 | 0  |
| 169 | 0  | 525.004308 | 603.166635 | 254.283281 | 638.674774 | 36 | 0  |
| 181 | 49 | 613.47732  | 968.286529 | 501.996204 | 858.59871  | 30 | 9  |
| 214 | 8  | 537.233072 | 793.529338 | 383.04352  | 763.136877 | 39 | 1  |
| 198 | 0  | 241.30899  | 371.919226 | 62.485323  | 188.572112 | 16 | 0  |
| 188 | 29 | 525.703174 | 777.597308 | 464.55451  | 872.964331 | 30 | 17 |
| 109 | 0  | 237.926432 | 400.5709   | 55.523461  | 160.883069 | 8  | 0  |
| 219 | 0  | 530.097478 | 621.683489 | 362.415073 | 854.906605 | 45 | 0  |
| 98  | 0  | 482.915904 | 509.923028 | 173.768423 | 663.640563 | 18 | 0  |
| 73  | 14 | 621.120659 | 562.009957 | 281.498548 | 689.284016 | 25 | 6  |
| 169 | 0  | 525.004308 | 603.166635 | 254.283281 | 638.674774 | 36 | 0  |

AnnotatedResults

| Marker1Pos | Marker1Pos | NumDouble | TotalNumD | Marker1Dot | Marker1Dot | Marker2Dot | Marker2Dot |
|------------|------------|-----------|-----------|------------|------------|------------|------------|
| 372.311804 | 78.755002  | 0         | 0         |            |            |            |            |
| 338.657445 | 46.651371  | 0         | 0         |            |            |            |            |
| 344.727273 |            | 0         | 0         |            |            |            |            |
| 808.057794 | 73.324978  | 0         | 0         |            |            |            |            |
| 549.455993 | 104.267574 | 1         | 0         | 665.792135 |            | 2647.78652 |            |
| 839.433018 | 208.12465  | 0         | 0         |            |            |            |            |
| 1207.14773 |            | 0         | 0         |            |            |            |            |
|            |            | 0         | 0         |            |            |            |            |
| 854.560525 | 202.914511 | 0         | 0         |            |            |            |            |
| 671.727963 | 22.583277  | 2         | 0         | 677.284109 | 28.892633  | 2360.46241 | 614.899338 |
| 839.433018 | 208.12465  | 0         | 0         |            |            |            |            |
| 1207.14773 |            | 0         | 0         |            |            |            |            |
|            |            | 0         | 0         |            |            |            |            |
| 854.560525 | 202.914511 | 0         | 0         |            |            |            |            |
| 671.727963 | 22.583277  | 2         | 0         | 677.284109 | 28.892633  | 2360.46241 | 614.899338 |
| 1395.92329 | 1115.15765 | 0         | 0         |            |            |            |            |
| 2463.3428  | 1381.92002 | 1         | 0         | 3440.50781 |            | 3440.50781 |            |
|            |            | 0         | 0         |            |            |            |            |
| 1109.89456 | 597.923354 | 0         | 0         |            |            |            |            |
| 1061.89787 | 613.362594 | 2         | 0         | 683.927915 | 34.508272  | 2762.52122 | 661.85915  |
| 1384.29272 | 1098.70953 | 0         | 0         |            |            |            |            |
| 1756.99187 | 1145.36049 | 1         | 0         | 3440.50781 |            | 3440.50781 |            |
|            |            | 0         | 0         |            |            |            |            |
| 1537.21922 | 915.391556 | 0         | 0         |            |            |            |            |
| 968.193768 | 569.943146 | 2         | 0         | 669.756638 | 14.46706   | 2736.18664 | 624.616421 |
| 1384.29272 | 1098.70953 | 0         | 0         |            |            |            |            |
| 1756.99187 | 1145.36049 | 1         | 0         | 3440.50781 |            | 3440.50781 |            |
|            |            | 0         | 0         |            |            |            |            |
| 1537.21922 | 915.391556 | 0         | 0         |            |            |            |            |
| 968.193768 | 569.943146 | 2         | 0         | 669.756638 | 14.46706   | 2736.18664 | 624.616421 |
| 794.709358 | 532.231546 | 2         | 1         | 1790.55411 | 175.824703 | 660.847403 | 249.695934 |
| 981.251675 | 837.828962 | 3         | 0         | 1162.99239 | 730.491824 | 785.888073 | 406.738765 |
| 791.752017 | 741.631181 | 7         | 5         | 1077.17521 | 656.293861 | 1419.60721 | 795.717502 |
| 1112.95697 | 997.467291 | 0         | 0         |            |            |            |            |
| 339.375    |            | 0         | 0         |            |            |            |            |
| 1334.28874 | 829.542985 | 3         | 0         | 1628.8765  | 878.099799 | 587.327338 | 362.860662 |
| 1452.89804 | 730.882956 | 3         | 0         | 1321.55665 | 711.784538 | 932.940643 | 642.939736 |
| 1431.37106 | 1089.56205 | 5         | 0         | 1543.38076 | 604.672933 | 1491.10233 | 947.619523 |
| 1475.25475 | 847.452111 | 1         | 0         | 1425.25743 |            | 306.485149 |            |
| 776.946903 |            | 0         | 0         |            |            |            |            |
| 1334.28874 | 829.542985 | 3         | 0         | 1628.8765  | 878.099799 | 587.327338 | 362.860662 |
| 1452.89804 | 730.882956 | 3         | 0         | 1321.55665 | 711.784538 | 932.940643 | 642.939736 |
| 1431.37106 | 1089.56205 | 5         | 0         | 1543.38076 | 604.672933 | 1491.10233 | 947.619523 |
| 1475.25475 | 847.452111 | 1         | 0         | 1425.25743 |            | 306.485149 |            |
| 776.946903 |            | 0         | 0         |            |            |            |            |
| 1000.30643 | 366.397845 | 0         | 0         |            |            |            |            |
| 1923.48627 | 926.605434 | 2         | 0         | 1541.4654  | 1112.84216 | 1214.32112 | 1162.54367 |
| 1642.63257 | 1251.77498 | 2         | 0         | 1776.7034  | 1036.04697 | 775.417099 | 451.166989 |
| 2613.33333 | 2573.86868 | 0         | 0         |            |            |            |            |
| 637.714286 |            | 0         | 0         |            |            |            |            |
| 975.718706 | 362.50213  | 0         | 0         |            |            |            |            |
| 1752.26129 | 961.174617 | 2         | 0         | 1541.4654  | 1112.84216 | 1214.32112 | 1162.54367 |
| 1628.68834 | 1252.09313 | 1         | 0         | 2509.29923 |            | 456.393862 |            |
| 2569.65256 | 2045.61301 | 0         | 0         |            |            |            |            |
| 637.714286 |            | 0         | 0         |            |            |            |            |
| 975.718706 | 362.50213  | 0         | 0         |            |            |            |            |
| 1752.26129 | 961.174617 | 2         | 0         | 1541.4654  | 1112.84216 | 1214.32112 | 1162.54367 |

AnnotatedResults

|            |            |    |    |            |            |            |            |
|------------|------------|----|----|------------|------------|------------|------------|
| 1628.68834 | 1252.09313 | 1  | 0  | 2509.29923 |            | 456.393862 |            |
| 2569.65256 | 2045.61301 | 0  | 0  |            |            |            |            |
| 637.714286 |            | 0  | 0  |            |            |            |            |
| 501.38435  | 217.721712 | 0  | 0  |            |            |            |            |
| 722.668504 | 603.312222 | 1  | 0  | 385.4      |            | 1525.59048 |            |
| 855.87499  | 915.985337 | 19 | 13 | 1301.95546 | 1143.20663 | 1475.28431 | 645.144072 |
|            |            | 0  | 0  |            |            |            |            |
| 810.948747 | 183.614484 | 0  | 0  |            |            |            |            |
| 1329.13171 | 837.87257  | 0  | 0  |            |            |            |            |
| 1670.76506 | 1167.98626 | 13 | 0  | 2044.81765 | 1079.91201 | 1344.96474 | 575.576187 |
|            |            | 0  | 0  |            |            |            |            |
| 810.948747 | 183.614484 | 0  | 0  |            |            |            |            |
| 1329.13171 | 837.87257  | 0  | 0  |            |            |            |            |
| 1670.76506 | 1167.98626 | 13 | 5  | 2044.81765 | 1079.91201 | 1344.96474 | 575.576187 |
|            |            | 0  | 0  |            |            |            |            |
| 1542.83369 | 1056.21369 | 0  | 0  |            |            |            |            |
| 1525.22032 | 941.615134 | 0  | 0  |            |            |            |            |
| 1553.95096 | 1189.14293 | 12 | 0  | 1761.83885 | 863.823081 | 1960.18594 | 939.497755 |
| 677.200537 | 51.643429  | 0  | 0  |            |            |            |            |
| 1376.99773 | 877.665024 | 1  | 0  | 2017.33333 |            | 416        |            |
| 1507.70216 | 888.668431 | 0  | 0  |            |            |            |            |
| 1654.36573 | 1261.26693 | 12 | 0  | 1633.9502  | 696.776529 | 2183.18738 | 1104.01431 |
| 797.862423 | 268.595387 | 0  | 0  |            |            |            |            |
| 1376.99773 | 877.665024 | 1  | 0  | 2017.33333 |            | 416        |            |
| 1507.70216 | 888.668431 | 0  | 0  |            |            |            |            |
| 1654.36573 | 1261.26693 | 12 | 2  | 1633.9502  | 696.776529 | 2183.18738 | 1104.01431 |
| 797.862423 | 268.595387 | 0  | 0  |            |            |            |            |
| 633.394157 | 521.764374 | 1  | 0  | 1041.98473 |            | 562.427481 |            |
| 447.606415 | 104.326434 | 0  | 0  |            |            |            |            |
| 532.238196 | 214.134448 | 8  | 8  | 469.690091 | 147.985733 | 2006.69925 | 1037.8599  |
| 578.850867 | 336.976357 | 0  | 0  |            |            |            |            |
| 623.41362  | 777.247164 | 18 | 9  | 489.249104 | 165.309024 | 1240.92005 | 517.797472 |
| 1167.51203 | 764.103732 | 1  | 0  | 963.083333 |            | 494.652778 |            |
| 964.974308 | 345.288905 | 0  | 0  |            |            |            |            |
| 827.017667 | 223.926038 | 2  | 2  | 848.737681 | 336.400415 | 3747.55652 | 360.591665 |
| 1025.52428 | 395.123805 | 0  | 0  |            |            |            |            |
| 1723.87871 | 1514.58696 | 4  | 0  | 770.541156 | 157.737496 | 1890.26456 | 938.485909 |
| 1167.51203 | 764.103732 | 1  | 0  | 963.083333 |            | 494.652778 |            |
| 964.974308 | 345.288905 | 0  | 0  |            |            |            |            |
| 827.017667 | 223.926038 | 2  | 2  | 848.737681 | 336.400415 | 3747.55652 | 360.591665 |
| 1025.52428 | 395.123805 | 0  | 0  |            |            |            |            |
| 1723.87871 | 1514.58696 | 4  | 0  | 770.541156 | 157.737496 | 1890.26456 | 938.485909 |
| 1023.51999 | 883.965801 | 0  | 0  |            |            |            |            |
| 1300.67979 | 498.764818 | 1  | 0  | 1969.1875  |            | 535.4375   |            |
| 829.634887 | 222.181376 | 1  | 1  | 1003.296   |            | 5505.36    |            |
| 962.001598 | 271.909499 | 0  | 0  |            |            |            |            |
| 1416.97915 | 1108.98695 | 8  | 0  | 1142.50147 | 869.443825 | 2786.79582 | 1192.11982 |
| 891.587329 | 723.014659 | 0  | 0  |            |            |            |            |
| 1238.03479 | 486.36235  | 2  | 0  | 1576.38064 | 555.512796 | 462.399078 | 103.291927 |
| 928.967527 | 300.390389 | 3  | 2  | 944.231061 | 208.20366  | 3345.55366 | 2906.58187 |
| 1143.41669 | 749.95961  | 0  | 0  |            |            |            |            |
| 1329.48136 | 1017.82001 | 8  | 0  | 1260.77219 | 900.720447 | 2765.49862 | 1198.53258 |
| 891.587329 | 723.014659 | 0  | 0  |            |            |            |            |
| 1238.03479 | 486.36235  | 2  | 0  | 1576.38064 | 555.512796 | 462.399078 | 103.291927 |
| 928.967527 | 300.390389 | 3  | 2  | 944.231061 | 208.20366  | 3345.55366 | 2906.58187 |
| 1143.41669 | 749.95961  | 0  | 0  |            |            |            |            |
| 1329.48136 | 1017.82001 | 8  | 2  | 1260.77219 | 900.720447 | 2765.49862 | 1198.53258 |
| 735.909645 | 633.956788 | 35 | 20 | 942.767745 | 774.77735  | 1325.91233 | 720.922154 |

## AnnotatedResults

|            |            |    |    |            |            |            |            |
|------------|------------|----|----|------------|------------|------------|------------|
| 684.010365 | 692.277043 | 2  | 0  | 1529.03957 | 1481.97893 | 997.559573 | 376.410829 |
| 596.560385 | 292.609871 | 1  | 1  | 357.84     |            | 644.4      |            |
| 485.492698 | 142.018503 | 0  | 0  |            |            |            |            |
| 1249.43423 | 1468.91751 | 32 | 21 | 2205.37064 | 1876.32566 | 1603.77308 | 1049.56493 |
| 1182.52684 | 722.875033 | 21 | 0  | 1302.94605 | 842.628918 | 1449.23912 | 826.606134 |
| 1421.84199 | 947.365041 | 3  | 0  | 1290.07328 | 1114.4832  | 902.763712 | 354.83749  |
| 934.311433 | 265.193687 | 0  | 0  |            |            |            |            |
| 1015.82195 | 470.977742 | 0  | 0  |            |            |            |            |
| 2473.8     | 1843.68    | 24 | 12 | 3384.5     | 1978       | 1840.87    | 1070.42    |
| 1182.52684 | 722.875033 | 21 | 6  | 1302.94605 | 842.628918 | 1449.23912 | 826.606134 |
| 1421.84199 | 947.365041 | 3  | 2  | 1290.07328 | 1114.4832  | 902.763712 | 354.83749  |
| 934.311433 | 265.193687 | 0  | 0  |            |            |            |            |
| 1015.82195 | 470.977742 | 0  | 0  |            |            |            |            |
| 2473.79713 | 1843.68254 | 24 | 18 | 3384.50012 | 1977.99909 | 1840.87267 | 1070.42391 |
| 1264.92975 | 771.404171 | 23 | 0  | 1539.01311 | 918.505909 | 2187.78202 | 1009.77894 |
| 1250.8237  | 414.49157  | 1  | 0  | 1459.89216 |            | 460.058824 |            |
| 948.392244 | 325.13263  | 0  | 0  |            |            |            |            |
| 739.02676  | 173.271811 | 0  | 0  |            |            |            |            |
| 2169.08149 | 1336.13269 | 21 | 9  | 2137.15092 | 1222.79966 | 1574.85112 | 778.654577 |
| 1253.37768 | 751.969767 | 24 | 0  | 1526.55712 | 918.392703 | 2120.16523 | 1004.90192 |
| 1573.04248 | 727.897836 | 1  | 0  | 1459.89216 |            | 460.058824 |            |
| 957.253049 | 309.605465 | 0  | 0  |            |            |            |            |
| 985.752709 | 449.153023 | 1  | 0  | 1918.34711 |            | 1280.24793 |            |
| 2158.77553 | 1323.30858 | 21 | 10 | 2257.54166 | 1180.6942  | 1558.36847 | 798.394196 |
| 1253.37768 | 751.969767 | 24 | 4  | 1526.55712 | 918.392703 | 2120.16523 | 1004.90192 |
| 1573.04248 | 727.897836 | 1  | 0  | 1459.89216 |            | 460.058824 |            |
| 957.253049 | 309.605465 | 0  | 0  |            |            |            |            |
| 985.752709 | 449.153023 | 1  | 0  | 1918.34711 |            | 1280.24793 |            |
| 2158.77553 | 1323.30858 | 21 | 10 | 2257.54166 | 1180.6942  | 1558.36847 | 798.394196 |
| 1241.25477 | 1181.7694  | 1  | 0  | 2736.88073 |            | 410.697248 |            |
| 1060.87591 | 1153.20125 | 3  | 0  | 990.096276 | 751.891839 | 1189.18919 | 1290.50098 |
| 689.583495 | 634.240516 | 19 | 10 | 873.243928 | 576.81669  | 1431.59684 | 779.574201 |
| 743.931809 | 734.048713 | 71 | 60 | 936.324583 | 1041.39261 | 1693.83291 | 843.1121   |
| 2018.43115 | 1057.45575 | 2  | 0  | 2388.76616 | 492.308353 | 691.353149 | 396.907382 |
| 1798.29182 | 1173.95128 | 7  | 0  | 1467.13271 | 819.204098 | 1234.29684 | 844.691931 |
| 1262.82759 | 993.310783 | 13 | 0  | 1056.20135 | 616.101907 | 1643.70272 | 764.282999 |
| 1190.78236 | 991.745393 | 39 | 6  | 1480.65266 | 1271.76925 | 2017.13505 | 844.553338 |
| 2018.43115 | 1057.45575 | 2  | 0  | 2388.76616 | 492.308353 | 691.353149 | 396.907382 |
| 1798.29182 | 1173.95128 | 7  | 0  | 1467.13271 | 819.204098 | 1234.29684 | 844.691931 |
| 1262.82759 | 993.310783 | 13 | 2  | 1056.20135 | 616.101907 | 1643.70272 | 764.282999 |
| 1190.78236 | 991.745393 | 39 | 22 | 1480.65266 | 1271.76925 | 2017.13505 | 844.553338 |
| 1250.65286 | 723.453537 | 2  | 0  | 1474.21504 | 1133.68369 | 974.63888  | 297.673977 |
| 1559.47127 | 910.542074 | 8  | 0  | 1573.02982 | 828.211837 | 1241.92149 | 995.974719 |
| 1233.62373 | 981.853365 | 22 | 0  | 1220.20778 | 740.334633 | 1685.69729 | 1042.97577 |
| 1219.03578 | 1085.56095 | 45 | 8  | 1494.2955  | 1389.03035 | 2560.9469  | 996.176473 |
| 1263.56343 | 796.684202 | 3  | 0  | 2031.28412 | 1253.57932 | 864.596765 | 285.283461 |
| 1629.71457 | 964.860248 | 8  | 0  | 1543.12367 | 837.336026 | 1302.02876 | 955.805041 |
| 1374.14968 | 1080.00612 | 26 | 3  | 1264.5116  | 787.110347 | 1594.55116 | 1015.77688 |
| 1213.61568 | 1075.26363 | 45 | 8  | 1489.49799 | 1384.4013  | 2498.10955 | 1017.43637 |
| 1263.56343 | 796.684202 | 3  | 0  | 2031.28412 | 1253.57932 | 864.596765 | 285.283461 |
| 1629.71457 | 964.860248 | 8  | 0  | 1543.12367 | 837.336026 | 1302.02876 | 955.805041 |
| 1374.14968 | 1080.00612 | 26 | 4  | 1264.5116  | 787.110347 | 1594.55116 | 1015.77688 |
| 1213.61568 | 1075.26363 | 45 | 30 | 1489.49799 | 1384.4013  | 2498.10955 | 1017.43637 |
| 1129.44324 | 1337.91431 | 1  | 0  | 2674       |            | 2695.16129 |            |
| 1011.5731  | 959.557769 | 0  | 0  |            |            |            |            |
| 313.333333 |            | 0  | 0  |            |            |            |            |
| 495.263817 | 181.876686 | 0  | 0  |            |            |            |            |
| 419.747532 | 86.794672  | 0  | 0  |            |            |            |            |

AnnotatedResults

|            |            |    |    |            |            |            |            |
|------------|------------|----|----|------------|------------|------------|------------|
| 1984.09744 | 975.669554 | 1  | 0  | 2674       |            | 2695.16129 |            |
| 1690.0829  |            | 0  | 0  |            |            |            |            |
|            |            | 0  | 0  |            |            |            |            |
| 754.595238 |            | 0  | 0  |            |            |            |            |
| 1893.75953 | 544.379868 | 0  | 0  |            |            |            |            |
| 1984.09744 | 975.669554 | 1  | 0  | 2674       |            | 2695.16129 |            |
| 1690.0829  |            | 0  | 0  |            |            |            |            |
|            |            | 0  | 0  |            |            |            |            |
| 754.595238 |            | 0  | 0  |            |            |            |            |
| 1893.75953 | 544.379868 | 0  | 0  |            |            |            |            |
| 927.264621 | 269.405231 | 0  | 0  |            |            |            |            |
| 1994.7102  | 1295.16037 | 0  | 0  |            |            |            |            |
| 1903.19231 |            | 1  | 0  | 1903.19231 |            | 311.416667 |            |
| 744.39473  | 125.461693 | 2  | 0  | 681.896747 | 89.695514  | 411.851554 | 41.058376  |
| 1661.34154 | 838.728447 | 0  | 0  |            |            |            |            |
| 1272.57919 | 627.706976 | 1  | 0  | 1963.20833 |            | 1208.92361 |            |
| 1779.32247 | 1164.60249 | 1  | 0  | 3195.20339 |            | 900.751412 |            |
| 1903.19231 |            | 1  | 0  | 1903.19231 |            | 311.416667 |            |
| 819.954897 | 65.761123  | 2  | 0  | 795.236997 | 70.591805  | 405.224458 | 50.430505  |
| 1648.73905 | 1000.66353 | 0  | 0  |            |            |            |            |
| 1272.57919 | 627.706976 | 1  | 0  | 1963.20833 |            | 1208.92361 |            |
| 1779.32247 | 1164.60249 | 1  | 0  | 3195.20339 |            | 900.751412 |            |
| 1903.19231 |            | 1  | 0  | 1903.19231 |            | 311.416667 |            |
| 819.954897 | 65.761123  | 2  | 0  | 795.236997 | 70.591805  | 405.224458 | 50.430505  |
| 1648.73905 | 1000.66353 | 0  | 0  |            |            |            |            |
| 705.886728 | 555.33323  | 0  | 0  |            |            |            |            |
| 452.657947 | 138.536834 | 1  | 0  | 819.267894 |            | 1965.46421 |            |
| 1180.68161 | 769.232608 | 0  | 0  |            |            |            |            |
| 1089.45429 | 546.784063 | 4  | 0  | 1378.29712 | 578.574747 | 2093.13695 | 772.394725 |
| 1180.68161 | 769.232608 | 0  | 0  |            |            |            |            |
| 1089.45429 | 546.784063 | 4  | 3  | 1378.29712 | 578.574747 | 2093.13695 | 772.394725 |
| 982.99098  | 424.6611   | 0  | 0  |            |            |            |            |
| 814.72014  | 155.759856 | 2  | 0  | 804.951169 | 277.489434 | 2879.25571 | 753.679517 |
| 933.231427 | 377.706253 | 0  | 0  |            |            |            |            |
| 844.791299 | 150.30653  | 2  | 0  | 802.123678 | 273.490759 | 2900.25461 | 783.376446 |
| 933.231427 | 377.706253 | 0  | 0  |            |            |            |            |
| 844.791299 | 150.30653  | 2  | 0  | 802.123678 | 273.490759 | 2900.25461 | 783.376446 |
| 688.037882 | 861.662909 | 12 | 3  | 1049.81548 | 1478.02327 | 1536.06419 | 832.223724 |
| 581.418206 | 338.067695 | 0  | 0  |            |            |            |            |
| 469.902044 | 99.397147  | 0  | 0  |            |            |            |            |
|            |            | 0  | 0  |            |            |            |            |
| 798.877094 | 920.650271 | 16 | 11 | 609.693119 | 300.271574 | 1805.34181 | 548.39384  |
| 1668.8852  | 1389.9753  | 3  | 0  | 3014.50227 | 2069.78322 | 1394.18677 | 1494.26477 |
| 1028.16004 | 321.629216 | 0  | 0  |            |            |            |            |
|            |            | 0  | 0  |            |            |            |            |
|            |            | 0  | 0  |            |            |            |            |
| 1223.22382 | 1045.22419 | 11 | 2  | 1513.00102 | 839.291234 | 1573.40103 | 676.730643 |
| 1668.8852  | 1389.9753  | 3  | 0  | 3014.50227 | 2069.78322 | 1394.18677 | 1494.26477 |
| 1028.16004 | 321.629216 | 0  | 0  |            |            |            |            |
|            |            | 0  | 0  |            |            |            |            |
|            |            | 0  | 0  |            |            |            |            |
| 1223.22382 | 1045.22419 | 11 | 2  | 1513.00102 | 839.291234 | 1573.40103 | 676.730643 |
| 2173.7802  | 1345.90642 | 6  | 0  | 2955.3448  | 822.169196 | 721.971953 | 405.311862 |
| 1247.37411 | 854.899313 | 2  | 0  | 761.635468 | 175.98592  | 402.948708 | 56.194987  |
| 645.310957 | 24.235439  | 0  | 0  |            |            |            |            |
|            |            | 0  | 0  |            |            |            |            |
| 1445.40202 | 1450.38702 | 3  | 0  | 857.653234 | 292.605187 | 1960.23915 | 622.33021  |
| 2186.01961 | 1409.59658 | 7  | 0  | 3252.70849 | 1068.59162 | 804.22326  | 429.98674  |



AnnotatedResults

|            |            |    |    |            |            |            |            |
|------------|------------|----|----|------------|------------|------------|------------|
| 1199.22952 | 846.655973 | 2  | 0  | 761.635468 | 175.98592  | 402.948708 | 56.194987  |
| 645.310957 | 24.235439  | 0  | 0  |            |            |            |            |
|            |            | 0  | 0  |            |            |            |            |
| 1459.72049 | 1414.0494  | 5  | 0  | 998.077336 | 366.363376 | 1770.25083 | 938.045733 |
| 2186.01961 | 1409.59658 | 7  | 0  | 3252.70849 | 1068.59162 | 804.22326  | 429.98674  |
| 1199.22952 | 846.655973 | 2  | 0  | 761.635468 | 175.98592  | 402.948708 | 56.194987  |
| 645.310957 | 24.235439  | 0  | 0  |            |            |            |            |
|            |            | 0  | 0  |            |            |            |            |
| 1459.72049 | 1414.0494  | 5  | 1  | 998.077336 | 366.363376 | 1770.25083 | 938.045733 |
| 570.443    | 362.647    | 10 | 6  | 966.304    | 673.643    | 1767.06    | 1287.48    |
| 532.053992 | 225.173829 | 0  | 0  |            |            |            |            |
| 479.812895 | 266.151764 | 0  | 0  |            |            |            |            |
| 915.827374 | 491.113089 | 9  | 0  | 1048.62008 | 685.592031 | 1749.42683 | 1394.01958 |
| 726.230604 | 116.210969 | 0  | 0  |            |            |            |            |
| 872.080145 | 268.369663 | 0  | 0  |            |            |            |            |
| 915.827374 | 491.113089 | 9  | 5  | 1048.62008 | 685.592031 | 1749.42683 | 1394.01958 |
| 726.230604 | 116.210969 | 0  | 0  |            |            |            |            |
| 872.080145 | 268.369663 | 0  | 0  |            |            |            |            |
| 881.542822 | 326.758761 | 12 | 7  | 982.152777 | 457.836229 | 2241.86601 | 1283.35479 |
| 737.139792 | 129.609509 | 1  | 0  | 603.313043 |            | 480.052174 |            |
| 792.033333 | 183.329218 | 0  | 0  |            |            |            |            |
| 884.449609 | 316.233508 | 11 | 7  | 1010.04844 | 465.305727 | 2417.28621 | 1219.53134 |
| 1164.52401 | 1123.61416 | 1  | 0  | 603.313043 |            | 480.052174 |            |
| 862.742066 | 167.42033  | 0  | 0  |            |            |            |            |
| 884.449609 | 316.233508 | 11 | 7  | 1010.04844 | 465.305727 | 2417.28621 | 1219.53134 |
| 1164.52401 | 1123.61416 | 1  | 0  | 603.313043 |            | 480.052174 |            |
| 862.742066 | 167.42033  | 0  | 0  |            |            |            |            |
| 744.727488 | 644.419297 | 0  | 0  |            |            |            |            |
| 1037.98934 | 774.003505 | 1  | 0  | 1869.13376 |            | 1869.76911 |            |
| 713.989142 | 732.53939  | 17 | 13 | 861.286485 | 1001.48939 | 1015.27607 | 599.636739 |
| 1303.44604 | 675.456683 | 1  | 0  | 1088.07692 |            | 359.538462 |            |
| 1212.92951 | 568.721471 | 1  | 0  | 1869.13376 |            | 1869.76911 |            |
| 1258.39671 | 1039.85173 | 8  | 2  | 1424.75104 | 1300.89653 | 913.229573 | 525.798852 |
| 1303.44604 | 675.456683 | 1  | 0  | 1088.07692 |            | 359.538462 |            |
| 1212.92951 | 568.721471 | 1  | 0  | 1869.13376 |            | 1869.76911 |            |
| 1258.39671 | 1039.85173 | 8  | 8  | 1424.75104 | 1300.89653 | 913.229573 | 525.798852 |
| 1267.19245 | 636.675637 | 1  | 0  | 1103.0303  |            | 406.666667 |            |
| 2712.14414 |            | 0  | 0  |            |            |            |            |
| 1084.85087 | 571.938044 | 4  | 0  | 981.23575  | 297.291065 | 1623.09611 | 572.030575 |
| 1707.55589 | 960.458948 | 1  | 0  | 1103.0303  |            | 406.666667 |            |
| 1574.31765 | 986.933076 | 0  | 0  |            |            |            |            |
| 1139.97791 | 573.248159 | 4  | 0  | 1055.24131 | 318.047667 | 1694.75459 | 564.446102 |
| 1707.55589 | 960.458948 | 1  | 0  | 1103.0303  |            | 406.666667 |            |
| 1574.31765 | 986.933076 | 0  | 0  |            |            |            |            |
| 1139.97791 | 573.248159 | 4  | 0  | 1055.24131 | 318.047667 | 1694.75459 | 564.446102 |
| 1181.21739 | 403.358303 | 1  | 0  | 1466.43478 |            | 764.93913  |            |
| 1000.34569 | 520.904398 | 1  | 0  | 396.876404 |            | 396.404494 |            |
|            |            | 0  | 0  |            |            |            |            |
| 334.493888 |            | 0  | 0  |            |            |            |            |
| 778.857476 | 573.769602 | 0  | 0  |            |            |            |            |
| 1209.96535 | 397.888937 | 1  | 0  | 1491.31532 |            | 682.09009  |            |
| 1559.50236 | 948.791236 | 0  | 0  |            |            |            |            |
|            |            | 0  | 0  |            |            |            |            |
|            |            | 0  | 0  |            |            |            |            |
|            |            | 0  | 0  |            |            |            |            |
| 1078.3221  | 538.326462 | 1  | 0  | 1581       |            | 859.871795 |            |
| 1209.96535 | 397.888937 | 1  | 0  | 1491.31532 |            | 682.09009  |            |
| 1559.50236 | 948.791236 | 0  | 0  |            |            |            |            |
|            |            | 0  | 0  |            |            |            |            |

AnnotatedResults

|            |            |    |    |            |            |            |            |
|------------|------------|----|----|------------|------------|------------|------------|
|            |            | 0  | 0  |            |            |            |            |
| 1078.3221  | 538.326462 | 1  | 0  | 1581       |            | 859.871795 |            |
| 3159.94783 |            | 0  | 0  |            |            |            |            |
| 1504.95626 | 493.95253  | 0  | 0  |            |            |            |            |
|            |            | 0  | 0  |            |            |            |            |
| 2083.14826 | 1141.12725 | 1  | 0  | 1362.5625  |            | 549.046875 |            |
| 1055.21364 | 356.366585 | 2  | 0  | 1263.17575 | 184.876568 | 945.907794 | 177.763982 |
| 2029.07875 | 1599.29038 | 0  | 0  |            |            |            |            |
| 1338.86222 | 511.384314 | 1  | 0  | 1075.70423 |            | 327.267606 |            |
| 1014.35897 |            | 1  | 0  | 1014.35897 |            | 614.871795 |            |
| 1781.49702 | 1173.13503 | 1  | 0  | 1179.45455 |            | 484.545455 |            |
| 1055.21364 | 356.366585 | 2  | 0  | 1263.17575 | 184.876568 | 945.907794 | 177.763982 |
| 2029.07875 | 1599.29038 | 0  | 0  |            |            |            |            |
| 1338.86222 | 511.384314 | 1  | 0  | 1075.70423 |            | 327.267606 |            |
| 1014.35897 |            | 1  | 0  | 1014.35897 |            | 614.871795 |            |
| 1781.49702 | 1173.13503 | 1  | 0  | 1179.45455 |            | 484.545455 |            |
| 1055.21364 | 356.366585 | 2  | 0  | 1263.17575 | 184.876568 | 945.907794 | 177.763982 |
| 2343.64436 | 1916.86115 | 1  | 0  | 1761.9562  |            | 908.255474 |            |
| 956.065718 | 1126.37027 | 0  | 0  |            |            |            |            |
| 3091.99239 | 1880.95521 | 1  | 0  | 1761.9562  |            | 908.255474 |            |
| 1784.98427 | 1313.64107 | 0  | 0  |            |            |            |            |
| 3091.99239 | 1880.95521 | 1  | 0  | 1761.9562  |            | 908.255474 |            |
| 1784.98427 | 1313.64107 | 0  | 0  |            |            |            |            |
| 2257.12479 | 1706.49618 | 2  | 0  | 3009.68719 | 1557.61274 | 1184.69116 | 362.637057 |
| 1351.73368 | 720.392374 | 2  | 0  | 1467.57343 | 1226.05253 | 367.04345  | 6.269294   |
| 2257.12479 | 1706.49618 | 2  | 0  | 3009.68719 | 1557.61274 | 1184.69116 | 362.637057 |
| 1230.38962 | 689.784902 | 2  | 0  | 1467.57343 | 1226.05253 | 367.04345  | 6.269294   |
| 2257.12479 | 1706.49618 | 2  | 0  | 3009.68719 | 1557.61274 | 1184.69116 | 362.637057 |
| 1230.38962 | 689.784902 | 2  | 0  | 1467.57343 | 1226.05253 | 367.04345  | 6.269294   |
| 543.562273 | 504.212277 | 2  | 0  | 1879.76189 | 976.988824 | 450.257156 | 87.649766  |
| 1423.79606 | 1538.85037 | 6  | 2  | 2198.0261  | 2018.8241  | 1386.15794 | 428.265849 |
| 609.26493  | 503.352117 | 5  | 5  | 1451.55288 | 1067.71533 | 1449.22257 | 626.248057 |
| 745.071361 | 930.268414 | 20 | 17 | 1005.4286  | 1197.1886  | 1474.25065 | 713.322234 |
| 1088.09438 | 351.39811  | 1  | 0  | 1458.44805 |            | 496.616883 |            |
| 2633.10995 | 1557.06425 | 4  | 0  | 3805.96345 | 985.328044 | 1358.6166  | 461.077339 |
| 1186.64951 | 881.503607 | 4  | 0  | 1950.30844 | 1012.90825 | 1548.52546 | 771.782891 |
| 1781.18036 | 1428.74943 | 14 | 0  | 2064.34494 | 1509.39582 | 2179.04952 | 1240.91406 |
| 1088.09438 | 351.39811  | 1  | 0  | 1458.44805 |            | 496.616883 |            |
| 2633.10995 | 1557.06425 | 4  | 0  | 3805.96345 | 985.328044 | 1358.6166  | 461.077339 |
| 1186.64951 | 881.503607 | 4  | 0  | 1950.30844 | 1012.90825 | 1548.52546 | 771.782891 |
| 1781.18036 | 1428.74943 | 14 | 6  | 2064.34494 | 1509.39582 | 2179.04952 | 1240.91406 |
| 1861.32147 | 1235.7429  | 6  | 0  | 2060.88572 | 1223.90161 | 830.667503 | 316.798367 |
| 2104.22571 | 1311.41575 | 5  | 0  | 2832.19626 | 829.828765 | 1033.15692 | 523.236947 |
| 1543.14023 | 1108.35744 | 6  | 0  | 2289.90171 | 938.176298 | 1826.66437 | 870.784818 |
| 1639.62712 | 816.301038 | 14 | 0  | 1694.17398 | 886.356309 | 2470.44361 | 1022.61661 |
| 1565.27946 | 1098.97734 | 7  | 0  | 1934.92618 | 1230.6292  | 784.310392 | 316.238048 |
| 2272.72351 | 1377.19292 | 6  | 0  | 3088.46174 | 921.077997 | 1065.94163 | 474.862043 |
| 1529.05071 | 1106.15748 | 5  | 0  | 2541.15075 | 722.481762 | 1769.10109 | 949.903685 |
| 1500.76156 | 850.395442 | 14 | 0  | 1657.8316  | 928.165998 | 2494.67037 | 968.56376  |
| 1565.27946 | 1098.97734 | 7  | 0  | 1934.92618 | 1230.6292  | 784.310392 | 316.238048 |
| 2272.72351 | 1377.19292 | 6  | 0  | 3088.46174 | 921.077997 | 1065.94163 | 474.862043 |
| 1529.05071 | 1106.15748 | 5  | 0  | 2541.15075 | 722.481762 | 1769.10109 | 949.903685 |
| 1500.76156 | 850.395442 | 14 | 7  | 1657.8316  | 928.165998 | 2494.67037 | 968.56376  |
| 769.626724 | 315.550566 | 0  | 0  |            |            |            |            |
|            |            | 0  | 0  |            |            |            |            |
| 985.668861 | 45.68228   | 1  | 0  | 1034.52632 |            | 408.315789 |            |
|            |            | 0  | 0  |            |            |            |            |
| 985.668861 | 45.68228   | 1  | 0  | 1034.52632 |            | 408.315789 |            |

AnnotatedResults

|            |            |    |   |            |            |            |            |
|------------|------------|----|---|------------|------------|------------|------------|
|            |            | 0  | 0 |            |            |            |            |
| 1894.22816 | 710.831302 | 0  | 0 |            |            |            |            |
|            |            | 0  | 0 |            |            |            |            |
| 1692.52245 | 732.805824 | 0  | 0 |            |            |            |            |
| 2904       |            | 0  | 0 |            |            |            |            |
| 1692.52245 | 732.805824 | 0  | 0 |            |            |            |            |
| 2904       |            | 0  | 0 |            |            |            |            |
| 568.219133 | 430.402274 | 0  | 0 |            |            |            |            |
| 623.946986 | 391.924395 | 4  | 0 | 1022.56959 | 502.356311 | 462.560034 | 181.921298 |
| 454.674598 | 153.532338 | 5  | 2 | 426.774777 | 95.25897   | 1059.09442 | 771.381164 |
| 1283.20082 | 637.387212 | 0  | 0 |            |            |            |            |
| 969.598898 | 409.11799  | 2  | 0 | 1231.45319 | 477.338019 | 510.227273 | 261.308097 |
| 913.779843 | 435.79212  | 3  | 0 | 779.560111 | 100.190642 | 807.504688 | 325.7796   |
| 1283.20082 | 637.387212 | 0  | 0 |            |            |            |            |
| 969.598898 | 409.11799  | 2  | 0 | 1231.45319 | 477.338019 | 510.227273 | 261.308097 |
| 913.779843 | 435.79212  | 3  | 0 | 779.560111 | 100.190642 | 807.504688 | 325.7796   |
| 959.384494 | 379.712381 | 1  | 0 | 1045       |            | 366.710526 |            |
| 1168.07925 | 482.421204 | 2  | 0 | 1237.42322 | 660.763889 | 740.18433  | 465.233151 |
| 854.311821 | 212.138629 | 0  | 0 |            |            |            |            |
| 1125.1288  | 340.811612 | 1  | 0 | 1045       |            | 366.710526 |            |
| 1538.10823 | 920.202024 | 4  | 0 | 1056.00177 | 441.40491  | 866.961573 | 430.628542 |
| 878.626103 | 197.50778  | 0  | 0 |            |            |            |            |
| 1125.1288  | 340.811612 | 1  | 0 | 1045       |            | 366.710526 |            |
| 1538.10823 | 920.202024 | 4  | 0 | 1056.00177 | 441.40491  | 866.961573 | 430.628542 |
| 878.626103 | 197.50778  | 0  | 0 |            |            |            |            |
| 488.991138 | 102.456213 | 0  | 0 |            |            |            |            |
| 2063.39545 | 2831.10244 | 0  | 0 |            |            |            |            |
| 899.231221 | 1068.44282 | 5  | 1 | 1223.17093 | 968.449744 | 2017.79915 | 788.52092  |
| 1152.61941 | 882.353063 | 21 | 4 | 1011.79079 | 730.998665 | 1334.18676 | 645.658667 |
|            |            | 0  | 0 |            |            |            |            |
| 5321.67102 |            | 0  | 0 |            |            |            |            |
| 807.569255 | 148.667474 | 2  | 0 | 896.927243 | 183.277221 | 1931.9465  | 782.18647  |
| 1462.67205 | 915.454902 | 20 | 0 | 1520.09068 | 1160.94649 | 1731.86163 | 1083.20303 |
|            |            | 0  | 0 |            |            |            |            |
| 5321.67102 |            | 0  | 0 |            |            |            |            |
| 807.569255 | 148.667474 | 2  | 0 | 896.927243 | 183.277221 | 1931.9465  | 782.18647  |
| 1462.67205 | 915.454902 | 20 | 0 | 1520.09068 | 1160.94649 | 1731.86163 | 1083.20303 |
| 1366.64502 | 1096.64679 | 1  | 0 | 1251.95257 |            | 1640.06324 |            |
| 3009.61503 | 2038.27859 | 0  | 0 |            |            |            |            |
|            |            | 0  | 0 |            |            |            |            |
| 1597.58003 | 845.653134 | 7  | 0 | 2048.34471 | 1315.86999 | 1424.36624 | 999.064267 |
| 1229.52944 | 997.987502 | 1  | 0 | 1251.95257 |            | 1640.06324 |            |
| 1798.43532 | 1652.67164 | 1  | 0 | 1408.47248 |            | 318.082569 |            |
| 2505.76546 | 2521.40778 | 1  | 0 | 722.860927 |            | 3107.39073 |            |
| 1604.93154 | 844.381388 | 11 | 0 | 2426.23131 | 1547.5006  | 1628.0089  | 1301.53773 |
| 1229.52944 | 997.987502 | 1  | 0 | 1251.95257 |            | 1640.06324 |            |
| 1798.43532 | 1652.67164 | 1  | 0 | 1408.47248 |            | 318.082569 |            |
| 2505.76546 | 2521.40778 | 1  | 0 | 722.860927 |            | 3107.39073 |            |
| 1604.93154 | 844.381388 | 11 | 0 | 2426.23131 | 1547.5006  | 1628.0089  | 1301.53773 |
| 834.265445 | 1071.86663 | 1  | 0 | 381.982301 |            | 1200.84956 |            |
| 849.35648  | 591.514387 | 1  | 0 | 448.966767 |            | 446.108761 |            |
| 756.987993 | 431.830462 | 0  | 0 |            |            |            |            |
| 715.9526   | 339.398614 | 0  | 0 |            |            |            |            |
| 553.112662 | 341.675051 | 0  | 0 |            |            |            |            |
| 462.473    | 174.794    | 1  | 0 | 306.278    |            | 1515.49    |            |
|            |            | 0  | 0 |            |            |            |            |
| 590.688509 | 636.594015 | 1  | 0 | 3352.47134 |            | 812.318471 |            |
| 1381.09887 | 1073.041   | 0  | 0 |            |            |            |            |

AnnotatedResults

|            |            |   |   |            |            |            |            |
|------------|------------|---|---|------------|------------|------------|------------|
| 1485.6723  | 797.769378 | 0 | 0 |            |            |            |            |
| 1108.97734 | 430.251836 | 0 | 0 |            |            |            |            |
| 955.943662 |            | 0 | 0 |            |            |            |            |
| 1590.42148 | 246.203897 | 2 | 0 | 1514.51943 | 237.851055 | 506.572362 | 93.274802  |
| 861.201204 | 180.949293 | 1 | 0 | 1031.40029 |            | 303.170306 |            |
| 940.496241 |            | 0 | 0 |            |            |            |            |
| 1812.39072 | 1060.03114 | 2 | 0 | 2499.20079 | 1206.70679 | 890.066212 | 109.95191  |
| 1381.09887 | 1073.041   | 0 | 0 |            |            |            |            |
| 1485.6723  | 797.769378 | 0 | 0 |            |            |            |            |
| 1108.97734 | 430.251836 | 0 | 0 |            |            |            |            |
| 955.943662 |            | 0 | 0 |            |            |            |            |
| 1590.42148 | 246.203897 | 2 | 0 | 1514.51943 | 237.851055 | 506.572362 | 93.274802  |
| 861.201204 | 180.949293 | 1 | 0 | 1031.40029 |            | 303.170306 |            |
| 940.496241 |            | 0 | 0 |            |            |            |            |
| 1812.39072 | 1060.03114 | 2 | 0 | 2499.20079 | 1206.70679 | 890.066212 | 109.95191  |
| 833.812788 | 257.711313 | 2 | 0 | 685.088469 | 10.8029    | 321.829164 | 21.421582  |
| 1863.28983 | 821.567952 | 0 | 0 |            |            |            |            |
| 1038.3819  | 355.958693 | 0 | 0 |            |            |            |            |
| 2007.73125 | 1325.78264 | 0 | 0 |            |            |            |            |
| 979.470307 | 370.407885 | 1 | 0 | 754        |            | 400.903885 |            |
| 1125.07386 | 524.763036 | 1 | 0 | 1319.09278 |            | 568.746392 |            |
| 3436.76744 |            | 0 | 0 |            |            |            |            |
| 1388.4952  | 1513.87023 | 1 | 0 | 4445.42675 |            | 890.828025 |            |
| 969.532528 | 353.849075 | 1 | 0 | 692.727273 |            | 306.681818 |            |
| 1694.38463 | 779.833842 | 2 | 0 | 1403.24561 | 147.582696 | 377.488889 | 48.931789  |
| 1085.28354 | 377.076039 | 1 | 0 | 1364.74138 |            | 549.137931 |            |
| 1709.51466 | 1235.93377 | 0 | 0 |            |            |            |            |
| 1017.63776 | 410.104097 | 1 | 0 | 754.332651 |            | 401.314227 |            |
| 1097.934   | 502.140026 | 1 | 0 | 1319.09278 |            | 568.746392 |            |
| 1926.22819 | 1370.26964 | 0 | 0 |            |            |            |            |
| 1289.63209 | 1407.88519 | 1 | 0 | 4445.42675 |            | 890.828025 |            |
| 969.532528 | 353.849075 | 1 | 0 | 692.727273 |            | 306.681818 |            |
| 1694.38463 | 779.833842 | 2 | 0 | 1403.24561 | 147.582696 | 377.488889 | 48.931789  |
| 1085.28354 | 377.076039 | 1 | 0 | 1364.74138 |            | 549.137931 |            |
| 1709.51466 | 1235.93377 | 0 | 0 |            |            |            |            |
| 1017.63776 | 410.104097 | 1 | 0 | 754.332651 |            | 401.314227 |            |
| 1097.934   | 502.140026 | 1 | 0 | 1319.09278 |            | 568.746392 |            |
| 1926.22819 | 1370.26964 | 0 | 0 |            |            |            |            |
| 1289.63209 | 1407.88519 | 1 | 0 | 4445.42675 |            | 890.828025 |            |
| 3956.15617 | 398.13589  | 0 | 0 |            |            |            |            |
| 1742.94053 | 1912.75478 | 3 | 0 | 1742.94053 | 1912.75478 | 1430.42313 | 1349.70326 |
| 2585.01022 |            | 0 | 0 |            |            |            |            |
| 3956.15617 | 398.13589  | 0 | 0 |            |            |            |            |
| 3383.74812 | 619.840748 | 3 | 0 | 3383.74812 | 619.840748 | 1683.41902 | 1156.23088 |
| 2601.64568 |            | 0 | 0 |            |            |            |            |
| 3956.15617 | 398.13589  | 0 | 0 |            |            |            |            |
| 3383.74812 | 619.840748 | 3 | 0 | 3383.74812 | 619.840748 | 1683.41902 | 1156.23088 |
| 2601.64568 |            | 0 | 0 |            |            |            |            |
| 1906.93188 |            | 0 | 0 |            |            |            |            |
| 1434.59345 | 866.865466 | 3 | 0 | 1697.37351 | 502.200893 | 1174.67242 | 857.839448 |
| 682.16129  |            | 0 | 0 |            |            |            |            |
| 1906.93188 |            | 0 | 0 |            |            |            |            |
| 1462.52549 | 844.924337 | 3 | 0 | 1702.40508 | 507.48433  | 1165.62108 | 839.694111 |
| 800.630645 | 167.540968 | 0 | 0 |            |            |            |            |
| 1906.93188 |            | 0 | 0 |            |            |            |            |
| 1462.52549 | 844.924337 | 3 | 0 | 1702.40508 | 507.48433  | 1165.62108 | 839.694111 |
| 800.630645 | 167.540968 | 0 | 0 |            |            |            |            |
| 520.335124 | 227.336785 | 0 | 0 |            |            |            |            |

AnnotatedResults

|            |            |    |    |            |            |            |            |
|------------|------------|----|----|------------|------------|------------|------------|
| 413.876148 | 88.508169  | 0  | 0  |            |            |            |            |
| 747.805085 | 628.054466 | 12 | 0  | 1021.6681  | 798.305773 | 1205.79698 | 566.262636 |
| 2119.36476 | 2019.76748 | 2  | 0  | 3867.92819 | 65.683762  | 3867.59852 | 65.217538  |
| 930.099476 | 202.120246 | 0  | 0  |            |            |            |            |
| 1730.5347  | 1877.06687 | 1  | 0  | 4538.34286 |            | 4539.6898  |            |
| 1524.65543 | 897.811341 | 6  | 0  | 1688.80687 | 579.769654 | 958.957537 | 557.765873 |
| 2942.95438 | 1076.78613 | 4  | 0  | 2942.95438 | 1076.78613 | 2940.96919 | 1078.88797 |
| 930.099476 | 202.120246 | 0  | 0  |            |            |            |            |
| 1730.5347  | 1877.06687 | 1  | 0  | 4538.34286 |            | 4539.6898  |            |
| 1524.65543 | 897.811341 | 6  | 0  | 1688.80687 | 579.769654 | 958.957537 | 557.765873 |
| 2942.95438 | 1076.78613 | 4  | 0  | 2942.95438 | 1076.78613 | 2940.96919 | 1078.88797 |
| 1286.87827 | 861.554474 | 0  | 0  |            |            |            |            |
| 1139.28248 | 452.163114 | 0  | 0  |            |            |            |            |
| 1665.96459 | 1052.10656 | 10 | 0  | 2044.67261 | 1285.69884 | 914.019644 | 650.166385 |
| 1882.38591 | 1431.63197 | 1  | 0  | 3925.27559 |            | 3929.15847 |            |
| 1202.28428 | 791.952516 | 0  | 0  |            |            |            |            |
| 1349.39456 | 645.853424 | 0  | 0  |            |            |            |            |
| 1567.17816 | 911.98595  | 9  | 0  | 1906.27106 | 1146.56308 | 916.314891 | 651.956289 |
| 1489.72567 | 1144.40921 | 1  | 0  | 3925.27559 |            | 3929.15847 |            |
| 1202.28428 | 791.952516 | 0  | 0  |            |            |            |            |
| 1349.39456 | 645.853424 | 0  | 0  |            |            |            |            |
| 1567.17816 | 911.98595  | 9  | 3  | 1906.27106 | 1146.56308 | 916.314891 | 651.956289 |
| 1489.72567 | 1144.40921 | 1  | 0  | 3925.27559 |            | 3929.15847 |            |
| 1028.23362 | 1127.86916 | 0  | 0  |            |            |            |            |
| 366.912619 | 58.755999  | 0  | 0  |            |            |            |            |
| 689.389738 | 614.958277 | 15 | 10 | 780.069006 | 741.843197 | 1618.11259 | 1045.59348 |
| 990.756199 | 1265.07716 | 4  | 2  | 2492.12375 | 2609.75528 | 965.135339 | 399.129829 |
| 1462.15794 | 1192.10381 | 0  | 0  |            |            |            |            |
|            |            | 0  | 0  |            |            |            |            |
| 986.537265 | 653.731513 | 8  | 0  | 1137.29085 | 811.343203 | 1986.2625  | 1066.87348 |
| 2409.76066 | 1795.77821 | 4  | 0  | 3880.72314 | 1809.45618 | 897.225303 | 186.064939 |
| 1462.15794 | 1192.10381 | 0  | 0  |            |            |            |            |
|            |            | 0  | 0  |            |            |            |            |
| 986.537265 | 653.731513 | 8  | 5  | 1137.29085 | 811.343203 | 1986.2625  | 1066.87348 |
| 2409.76066 | 1795.77821 | 4  | 4  | 3880.72314 | 1809.45618 | 897.225303 | 186.064939 |
| 791.454748 | 46.776598  | 0  | 0  |            |            |            |            |
| 1958.41845 | 1515.09536 | 0  | 0  |            |            |            |            |
| 1634.32414 | 1324.31669 | 4  | 0  | 784.500458 | 195.137097 | 2886.70307 | 1334.59548 |
| 2813.31911 | 1758.55734 | 10 | 0  | 3815.38172 | 1398.16872 | 1177.70806 | 757.228904 |
| 1106.58543 | 649.146401 | 0  | 0  |            |            |            |            |
| 1380.24074 | 936.379331 | 0  | 0  |            |            |            |            |
| 1519.03286 | 1224.43614 | 5  | 0  | 772.215739 | 181.791404 | 2674.19202 | 1262.54663 |
| 2592.82263 | 1699.77757 | 11 | 0  | 3524.64311 | 1492.49417 | 1133.73629 | 682.451076 |
| 1106.58543 | 649.146401 | 0  | 0  |            |            |            |            |
| 1380.24074 | 936.379331 | 0  | 0  |            |            |            |            |
| 1519.03286 | 1224.43614 | 5  | 3  | 772.215739 | 181.791404 | 2674.19202 | 1262.54663 |
| 2592.82263 | 1699.77757 | 11 | 8  | 3524.64311 | 1492.49417 | 1133.73629 | 682.451076 |
| 710.653799 | 705.257525 | 31 | 22 | 732.713669 | 697.614154 | 2052.06564 | 913.65805  |
|            |            | 0  | 0  |            |            |            |            |
|            |            | 0  | 0  |            |            |            |            |
| 929.12097  | 833.074108 | 1  | 0  | 554.549451 |            | 784.527473 |            |
| 385.325455 |            | 0  | 0  |            |            |            |            |
| 1248.73185 | 935.165633 | 10 | 2  | 1470.59489 | 896.176962 | 1877.43982 | 1043.5774  |
|            |            | 0  | 0  |            |            |            |            |
|            |            | 0  | 0  |            |            |            |            |
| 2316.32142 | 1075.86734 | 0  | 0  |            |            |            |            |
| 707.09636  |            | 0  | 0  |            |            |            |            |
| 1248.73185 | 935.165633 | 10 | 2  | 1470.59489 | 896.176962 | 1877.43982 | 1043.5774  |

AnnotatedResults

|            |            |    |    |            |            |            |            |
|------------|------------|----|----|------------|------------|------------|------------|
|            |            | 0  | 0  |            |            |            |            |
|            |            | 0  | 0  |            |            |            |            |
| 2316.32142 | 1075.86734 | 0  | 0  |            |            |            |            |
| 707.09636  |            | 0  | 0  |            |            |            |            |
| 1449.24541 | 1047.20481 | 20 | 0  | 2052.15037 | 1107.3677  | 2011.18615 | 1366.87583 |
|            |            | 0  | 0  |            |            |            |            |
|            |            | 0  | 0  |            |            |            |            |
| 1732.12627 | 1095.38376 | 0  | 0  |            |            |            |            |
| 995.987261 |            | 0  | 0  |            |            |            |            |
| 1423.65039 | 975.233819 | 18 | 3  | 2077.01796 | 958.841982 | 1967.67529 | 1398.09133 |
|            |            | 0  | 0  |            |            |            |            |
|            |            | 0  | 0  |            |            |            |            |
| 1739.4008  | 1068.7314  | 0  | 0  |            |            |            |            |
| 1003.08532 | 362.508688 | 0  | 0  |            |            |            |            |
| 1423.65039 | 975.233819 | 18 | 13 | 2077.01796 | 958.841982 | 1967.67529 | 1398.09133 |
|            |            | 0  | 0  |            |            |            |            |
|            |            | 0  | 0  |            |            |            |            |
| 1739.4008  | 1068.7314  | 0  | 0  |            |            |            |            |
| 1003.08532 | 362.508688 | 0  | 0  |            |            |            |            |
| 607.629181 | 386.078966 | 0  | 0  |            |            |            |            |
| 4473.95149 |            | 0  | 0  |            |            |            |            |
| 592.940078 | 355.404288 | 2  | 0  | 1035.376   | 642.717863 | 1952.42109 | 401.688231 |
| 1065.89381 | 1095.92592 | 37 | 33 | 966.531746 | 723.934824 | 1250.73725 | 660.287649 |
| 965.072304 | 1312.37614 | 2  | 0  | 440.15264  | 193.020315 | 884.926568 | 74.378065  |
| 1235.00851 | 551.390598 | 0  | 0  |            |            |            |            |
| 4473.95149 |            | 0  | 0  |            |            |            |            |
| 925.35963  | 347.085415 | 1  | 0  | 1499.16041 |            | 1608.79522 |            |
| 1446.23964 | 1081.23004 | 31 | 9  | 1158.16899 | 509.061712 | 1518.21109 | 666.102814 |
| 2466.64337 | 1877.54439 | 1  | 0  | 623.611872 |            | 998.228311 |            |
| 1235.00851 | 551.390598 | 0  | 0  |            |            |            |            |
| 4473.95149 |            | 0  | 0  |            |            |            |            |
| 925.35963  | 347.085415 | 1  | 0  | 1499.16041 |            | 1608.79522 |            |
| 1446.23964 | 1081.23004 | 31 | 14 | 1158.16899 | 509.061712 | 1518.21109 | 666.102814 |
| 2466.64337 | 1877.54439 | 1  | 0  | 623.611872 |            | 998.228311 |            |
| 1583.36513 | 1076.28635 | 0  | 0  |            |            |            |            |
|            |            | 0  | 0  |            |            |            |            |
| 1390.11201 | 1006.71387 | 3  | 0  | 1851.25043 | 1105.9051  | 2285.95455 | 540.413437 |
| 1417.16217 | 838.216126 | 18 | 0  | 1411.90881 | 819.264413 | 1835.10335 | 844.37152  |
| 2096.05312 | 1534.52078 | 3  | 0  | 1374.03479 | 708.584297 | 993.594084 | 463.759844 |
| 1686.20394 | 1140.13132 | 0  | 0  |            |            |            |            |
|            |            | 0  | 0  |            |            |            |            |
| 1493.29072 | 929.644372 | 3  | 0  | 1908.65384 | 1008.86319 | 1603.22505 | 1183.06959 |
| 1386.46703 | 851.390418 | 16 | 0  | 1422.47806 | 858.086874 | 1744.25794 | 844.607599 |
| 2174.40006 | 1494.30278 | 3  | 0  | 1367.51582 | 698.618942 | 989.251932 | 454.889287 |
| 1686.20394 | 1140.13132 | 0  | 0  |            |            |            |            |
|            |            | 0  | 0  |            |            |            |            |
| 1493.29072 | 929.644372 | 3  | 0  | 1908.65384 | 1008.86319 | 1603.22505 | 1183.06959 |
| 1386.46703 | 851.390418 | 16 | 8  | 1422.47806 | 858.086874 | 1744.25794 | 844.607599 |
| 2174.40006 | 1494.30278 | 3  | 0  | 1367.51582 | 698.618942 | 989.251932 | 454.889287 |
| 471.596859 |            | 0  | 0  |            |            |            |            |
| 527.783699 |            | 0  | 0  |            |            |            |            |
|            |            | 0  | 0  |            |            |            |            |
|            |            | 0  | 0  |            |            |            |            |
|            |            | 0  | 0  |            |            |            |            |
| 787.907289 | 232.973157 | 0  | 0  |            |            |            |            |
|            |            | 0  | 0  |            |            |            |            |
|            |            | 0  | 0  |            |            |            |            |
|            |            | 0  | 0  |            |            |            |            |
|            |            | 0  | 0  |            |            |            |            |

AnnotatedResults

|            |            |    |    |            |            |            |            |
|------------|------------|----|----|------------|------------|------------|------------|
|            |            | 0  | 0  |            |            |            |            |
| 787.907289 | 232.973157 | 0  | 0  |            |            |            |            |
|            |            | 0  | 0  |            |            |            |            |
|            |            | 0  | 0  |            |            |            |            |
|            |            | 0  | 0  |            |            |            |            |
|            |            | 0  | 0  |            |            |            |            |
| 1422.13675 | 746.977751 | 1  | 0  | 1918.7037  |            | 629.240741 |            |
| 730.480583 |            | 0  | 0  |            |            |            |            |
| 1156.41703 | 123.082417 | 0  | 0  |            |            |            |            |
|            |            | 0  | 0  |            |            |            |            |
| 908.546218 |            | 0  | 0  |            |            |            |            |
| 1441.77631 | 776.743673 | 1  | 0  | 1918.7037  |            | 629.240741 |            |
| 945.093493 | 527.583366 | 0  | 0  |            |            |            |            |
| 1040.20885 | 170.998014 | 0  | 0  |            |            |            |            |
|            |            | 0  | 0  |            |            |            |            |
| 1124.70111 |            | 0  | 0  |            |            |            |            |
| 1441.77631 | 776.743673 | 1  | 0  | 1918.7037  |            | 629.240741 |            |
| 945.093493 | 527.583366 | 0  | 0  |            |            |            |            |
| 1040.20885 | 170.998014 | 0  | 0  |            |            |            |            |
|            |            | 0  | 0  |            |            |            |            |
| 1124.70111 |            | 0  | 0  |            |            |            |            |
| 811.50323  | 1016.50572 | 38 | 24 | 874.325197 | 1085.98168 | 1200.30758 | 561.246139 |
| 854.119569 | 735.206119 | 15 | 10 | 1339.02192 | 1067.15598 | 1491.2307  | 561.891477 |
| 680.892034 | 663.572911 | 11 | 6  | 1069.97533 | 903.652811 | 1572.0715  | 959.193909 |
| 672.184094 | 611.894441 | 38 | 24 | 595.57479  | 405.224268 | 2035.58127 | 977.518398 |
| 962.249389 | 1042.63619 | 1  | 1  | 716.234043 |            | 334.212766 |            |
| 1473.09983 | 1432.4456  | 14 | 2  | 1644.3733  | 1525.36686 | 1040.44596 | 466.553613 |
| 1298.63001 | 930.667075 | 11 | 0  | 1683.19997 | 1155.60906 | 1742.00915 | 732.542129 |
| 1453.97071 | 973.682926 | 11 | 0  | 1319.2648  | 814.743242 | 1424.97863 | 908.101372 |
| 1144.73776 | 878.010831 | 14 | 5  | 866.308018 | 563.56771  | 2378.45184 | 986.987461 |
| 1477.64416 | 808.666253 | 2  | 0  | 1220.61479 | 720.838131 | 419.430441 | 121.739849 |
| 1473.09983 | 1432.4456  | 14 | 5  | 1644.3733  | 1525.36686 | 1040.44596 | 466.553613 |
| 1298.63001 | 930.667075 | 11 | 0  | 1683.19997 | 1155.60906 | 1742.00915 | 732.542129 |
| 1453.97071 | 973.682926 | 11 | 0  | 1319.2648  | 814.743242 | 1424.97863 | 908.101372 |
| 1144.73776 | 878.010831 | 14 | 5  | 866.308018 | 563.56771  | 2378.45184 | 986.987461 |
| 1477.64416 | 808.666253 | 2  | 0  | 1220.61479 | 720.838131 | 419.430441 | 121.739849 |
| 1534.75831 | 1493.50326 | 20 | 6  | 1939.98428 | 2063.07109 | 1399.36825 | 931.576407 |
| 1312.96273 | 1005.54945 | 7  | 0  | 1794.11046 | 1379.78345 | 1469.2995  | 575.156406 |
| 1718.87832 | 1932.51994 | 15 | 0  | 2505.07783 | 2386.06249 | 1568.15582 | 1186.36143 |
| 1168.71375 | 908.686054 | 13 | 3  | 1177.81476 | 921.050201 | 2594.31176 | 1257.97611 |
| 1291.91153 | 780.482673 | 1  | 0  | 950.147059 |            | 312.382353 |            |
| 1502.15675 | 1483.73296 | 20 | 5  | 1851.26034 | 2074.54002 | 1438.50655 | 877.183465 |
| 1235.02279 | 963.117964 | 7  | 0  | 1786.71744 | 1385.50401 | 1454.02983 | 580.480189 |
| 1585.97    | 1832.5188  | 16 | 0  | 2407.08925 | 2332.58059 | 1522.23572 | 1172.65667 |
| 1218.0925  | 928.559785 | 14 | 3  | 1183.18749 | 931.584777 | 2589.12336 | 1280.88298 |
| 1278.01874 | 734.668711 | 2  | 0  | 1320.49926 | 536.802843 | 498.293805 | 267.207578 |
| 1502.15675 | 1483.73296 | 20 | 9  | 1851.26034 | 2074.54002 | 1438.50655 | 877.183465 |
| 1235.02279 | 963.117964 | 7  | 1  | 1786.71744 | 1385.50401 | 1454.02983 | 580.480189 |
| 1585.97    | 1832.5188  | 16 | 2  | 2407.08925 | 2332.58059 | 1522.23572 | 1172.65667 |
| 1218.0925  | 928.559785 | 14 | 10 | 1183.18749 | 931.584777 | 2589.12336 | 1280.88298 |
| 1278.01874 | 734.668711 | 2  | 0  | 1320.49926 | 536.802843 | 498.293805 | 267.207578 |
| 667.689409 | 469.229452 | 1  | 0  | 336.509434 |            | 1499.89623 |            |
| 674.740212 | 642.320739 | 0  | 0  |            |            |            |            |
| 542.474609 | 386.627854 | 3  | 0  | 410.291867 | 102.34788  | 909.907565 | 452.75452  |
| 883.796214 | 1100.40998 | 53 | 49 | 1087.15475 | 1309.73084 | 1892.11517 | 993.03593  |
| 692.1173   | 342.527994 | 1  | 0  | 524.595    |            | 364.08     |            |
| 986.020633 | 504.399601 | 0  | 0  |            |            |            |            |
| 1088.37646 | 699.767356 | 0  | 0  |            |            |            |            |

AnnotatedResults

|            |            |    |    |            |            |            |            |
|------------|------------|----|----|------------|------------|------------|------------|
| 1158.26736 | 808.787295 | 0  | 0  |            |            |            |            |
| 2052.75527 | 1632.13207 | 27 | 9  | 2036.87425 | 1674.47086 | 2196.27959 | 1350.94847 |
| 747.414141 | 51.111678  | 0  | 0  |            |            |            |            |
| 986.020633 | 504.399601 | 0  | 0  |            |            |            |            |
| 1088.37646 | 699.767356 | 0  | 0  |            |            |            |            |
| 1158.26736 | 808.787295 | 0  | 0  |            |            |            |            |
| 2052.75527 | 1632.13207 | 27 | 20 | 2036.87425 | 1674.47086 | 2196.27959 | 1350.94847 |
| 747.414141 | 51.111678  | 0  | 0  |            |            |            |            |
| 1381.91412 | 762.512238 | 0  | 0  |            |            |            |            |
| 1313.7947  | 678.795401 | 0  | 0  |            |            |            |            |
| 804.805062 | 62.348193  | 0  | 0  |            |            |            |            |
| 1534.56217 | 962.363701 | 34 | 17 | 1501.68743 | 922.09995  | 2173.00103 | 1892.68076 |
| 991.430594 | 355.944965 | 1  | 0  | 1243.12169 |            | 856.873016 |            |
| 1405.12526 | 765.208506 | 0  | 0  |            |            |            |            |
| 1326.0468  | 629.397167 | 0  | 0  |            |            |            |            |
| 1860.85241 | 1617.29907 | 0  | 0  |            |            |            |            |
| 1729.81734 | 1019.34876 | 37 | 20 | 1600.43632 | 911.044257 | 2030.49989 | 1839.05284 |
| 907.964062 | 232.524721 | 1  | 0  | 1243.12169 |            | 856.873016 |            |
| 1405.12526 | 765.208506 | 0  | 0  |            |            |            |            |
| 1326.0468  | 629.397167 | 0  | 0  |            |            |            |            |
| 1860.85241 | 1617.29907 | 0  | 0  |            |            |            |            |
| 1729.81734 | 1019.34876 | 37 | 24 | 1600.43632 | 911.044257 | 2030.49989 | 1839.05284 |
| 907.964062 | 232.524721 | 1  | 0  | 1243.12169 |            | 856.873016 |            |
| 877.666724 | 907.00824  | 1  | 0  | 2222.71539 |            | 436.5      |            |
| 548.996463 | 502.187126 | 11 | 5  | 844.536435 | 857.367399 | 1208.11885 | 518.99138  |
| 965.864778 | 481.838815 | 1  | 0  | 625.153285 |            | 605.883212 |            |
|            |            | 0  | 0  |            |            |            |            |
|            |            | 0  | 0  |            |            |            |            |
| 1489.21023 | 1248.2312  | 1  | 0  | 2371.84298 |            | 468.966942 |            |
| 1058.07954 | 792.663955 | 5  | 0  | 1384.06633 | 978.165641 | 1182.37266 | 378.786145 |
| 965.864778 | 481.838815 | 1  | 0  | 625.153285 |            | 605.883212 |            |
|            |            | 0  | 0  |            |            |            |            |
|            |            | 0  | 0  |            |            |            |            |
| 1489.21023 | 1248.2312  | 1  | 0  | 2371.84298 |            | 468.966942 |            |
| 1058.07954 | 792.663955 | 5  | 0  | 1384.06633 | 978.165641 | 1182.37266 | 378.786145 |
| 965.864778 | 481.838815 | 1  | 0  | 625.153285 |            | 605.883212 |            |
|            |            | 0  | 0  |            |            |            |            |
|            |            | 0  | 0  |            |            |            |            |
| 2845.54112 | 294.772446 | 1  | 0  | 2637.10553 |            | 1454.95477 |            |
| 1779.71692 | 1250.62255 | 7  | 0  | 1950.16337 | 1259.59778 | 1154.68601 | 579.468495 |
| 1417.28571 | 1071.85266 | 0  | 0  |            |            |            |            |
| 1661.83862 | 662.380159 | 0  | 0  |            |            |            |            |
| 1535.0498  | 1300.98701 | 1  | 0  | 3021.35417 |            | 1705.25    |            |
| 1726.33785 | 1034.75066 | 2  | 0  | 1836.76304 | 1131.8552  | 918.650284 | 758.449083 |
| 1615.53998 | 1211.71924 | 6  | 0  | 2123.72504 | 1294.08613 | 1265.58446 | 592.514139 |
| 1147.11296 | 890.737908 | 0  | 0  |            |            |            |            |
| 1193.46512 |            | 0  | 0  |            |            |            |            |
| 1535.0498  | 1300.98701 | 1  | 0  | 3021.35417 |            | 1705.25    |            |
| 1726.33785 | 1034.75066 | 2  | 0  | 1836.76304 | 1131.8552  | 918.650284 | 758.449083 |
| 1615.53998 | 1211.71924 | 6  | 0  | 2123.72504 | 1294.08613 | 1265.58446 | 592.514139 |
| 1147.11296 | 890.737908 | 0  | 0  |            |            |            |            |
| 1193.46512 |            | 0  | 0  |            |            |            |            |
| 1535.0498  | 1300.98701 | 1  | 0  | 3021.35417 |            | 1705.25    |            |
| 741.437573 | 727.216634 | 11 | 5  | 1159.59112 | 852.588967 | 1185.80591 | 446.388925 |
| 777.541537 | 758.585394 | 29 | 21 | 1015.07456 | 840.443618 | 1918.33973 | 861.012955 |
| 477.766568 | 182.258346 | 0  | 0  |            |            |            |            |
| 446.284404 |            | 0  | 0  |            |            |            |            |
| 1252.46966 | 867.063116 | 11 | 0  | 1394.41121 | 747.665885 | 1206.73993 | 733.547594 |



AnnotatedResults

|            |            |    |    |            |            |            |            |
|------------|------------|----|----|------------|------------|------------|------------|
| 1348.37069 | 1058.34914 | 16 | 0  | 1453.91468 | 809.330748 | 2087.78074 | 965.127466 |
| 830.17931  |            | 0  | 0  |            |            |            |            |
| 2326.86751 | 234.444134 | 1  | 0  | 2492.64455 |            | 355.78673  |            |
| 1252.46966 | 867.063116 | 11 | 0  | 1394.41121 | 747.665885 | 1206.73993 | 733.547594 |
| 1348.37069 | 1058.34914 | 16 | 9  | 1453.91468 | 809.330748 | 2087.78074 | 965.127466 |
| 830.17931  |            | 0  | 0  |            |            |            |            |
| 2326.86751 | 234.444134 | 1  | 0  | 2492.64455 |            | 355.78673  |            |
| 2173.66369 | 1412.88498 | 15 | 0  | 2259.43799 | 1089.71464 | 1306.22462 | 888.3721   |
| 1159.22242 | 715.574375 | 10 | 0  | 1502.46778 | 717.162368 | 1961.10178 | 883.777868 |
| 2119.19327 | 1403.81658 | 1  | 0  | 2483.96342 |            | 1808.90244 |            |
| 2292.95402 | 1508.51533 | 0  | 0  |            |            |            |            |
| 2121.2218  | 1391.39235 | 16 | 8  | 2288.29613 | 1155.20224 | 1277.5613  | 867.123268 |
| 1310.11306 | 908.241047 | 10 | 0  | 1593.05057 | 713.969544 | 2040.25253 | 790.924987 |
| 2316.28021 | 1422.34481 | 1  | 0  | 2483.96342 |            | 1808.90244 |            |
| 2200.06972 | 1580.10313 | 0  | 0  |            |            |            |            |
| 2121.2218  | 1391.39235 | 16 | 8  | 2288.29613 | 1155.20224 | 1277.5613  | 867.123268 |
| 1310.11306 | 908.241047 | 10 | 6  | 1593.05057 | 713.969544 | 2040.25253 | 790.924987 |
| 2316.28021 | 1422.34481 | 1  | 0  | 2483.96342 |            | 1808.90244 |            |
| 2200.06972 | 1580.10313 | 0  | 0  |            |            |            |            |
| 826.772727 |            | 1  | 0  | 826.772727 |            | 414.978355 |            |
| 1723.89933 | 1665.19733 | 0  | 0  |            |            |            |            |
| 674.910572 | 539.6105   | 23 | 21 | 1065.69969 | 830.137739 | 1921.84792 | 862.244251 |
| 857.113    | 764.011    | 47 | 37 | 1326.35    | 980.276    | 1428.01    | 739.81     |
| 826.772727 |            | 1  | 0  | 826.772727 |            | 414.978355 |            |
| 2297.09559 | 1890.6191  | 0  | 0  |            |            |            |            |
| 1072.5854  | 668.852216 | 20 | 0  | 1250.60171 | 844.133814 | 2166.48159 | 851.751357 |
| 1349.51729 | 823.66122  | 38 | 18 | 1621.07957 | 881.255471 | 1462.9124  | 804.215047 |
| 826.772727 |            | 1  | 0  | 826.772727 |            | 414.978355 |            |
| 2297.09559 | 1890.6191  | 0  | 0  |            |            |            |            |
| 1072.5854  | 668.852216 | 20 | 11 | 1250.60171 | 844.133814 | 2166.48159 | 851.751357 |
| 1349.51729 | 823.66122  | 38 | 24 | 1621.07957 | 881.255471 | 1462.9124  | 804.215047 |
| 657.042254 |            | 1  | 0  | 657.042254 |            | 357.866197 |            |
| 2267.31131 | 2016.22643 | 1  | 0  | 813.082873 |            | 575.038674 |            |
| 1104.66078 | 710.329738 | 23 | 0  | 1245.47661 | 863.947283 | 2910.80793 | 955.277945 |
| 1432.97119 | 974.057303 | 43 | 20 | 1714.56228 | 1029.97485 | 1769.18263 | 1040.37284 |
| 657.042254 |            | 1  | 0  | 657.042254 |            | 357.866197 |            |
| 1926.0768  | 1782.09895 | 1  | 0  | 813.082873 |            | 575.038674 |            |
| 1092.52231 | 697.530936 | 24 | 0  | 1218.18229 | 841.07347  | 2877.99215 | 948.710578 |
| 1487.14861 | 995.793683 | 43 | 22 | 1747.11682 | 1023.38519 | 1753.00654 | 1048.86356 |
| 657.042254 |            | 1  | 0  | 657.042254 |            | 357.866197 |            |
| 1926.0768  | 1782.09895 | 1  | 0  | 813.082873 |            | 575.038674 |            |
| 1092.52231 | 697.530936 | 24 | 13 | 1218.18229 | 841.07347  | 2877.99215 | 948.710578 |
| 1487.14861 | 995.793683 | 43 | 32 | 1747.11682 | 1023.38519 | 1753.00654 | 1048.86356 |
| 654.046528 | 445.665799 | 12 | 9  | 1099.01096 | 732.486627 | 1800.51006 | 901.168555 |
| 1043.29    | 1019.11    | 74 | 68 | 1545.19    | 1192.06    | 1366.56    | 752.218    |
| 652.79484  | 344.781725 | 11 | 6  | 1026.44162 | 530.094835 | 1851.88039 | 835.319696 |
| 523.560972 | 264.376173 | 0  | 0  |            |            |            |            |
| 774.843047 | 586.886096 | 4  | 4  | 1415.64401 | 526.604172 | 832.309295 | 611.210621 |
| 1174.66749 | 799.112362 | 15 | 6  | 1617.4607  | 1064.7402  | 2019.5778  | 921.88347  |
| 1961.08672 | 1090.83085 | 45 | 33 | 2182.97761 | 1106.20109 | 1274.20854 | 769.255044 |
| 968.125773 | 384.523679 | 8  | 0  | 1281.0266  | 508.315527 | 2077.85687 | 778.275751 |
| 835.941985 | 144.393317 | 0  | 0  |            |            |            |            |
| 1709.63705 | 1222.55236 | 4  | 0  | 2819.93371 | 1232.75334 | 665.888007 | 320.463266 |
| 1174.66749 | 799.112362 | 15 | 14 | 1617.4607  | 1064.7402  | 2019.5778  | 921.88347  |
| 1961.08672 | 1090.83085 | 45 | 35 | 2182.97761 | 1106.20109 | 1274.20854 | 769.255044 |
| 968.125773 | 384.523679 | 8  | 4  | 1281.0266  | 508.315527 | 2077.85687 | 778.275751 |
| 835.941985 | 144.393317 | 0  | 0  |            |            |            |            |
| 1709.63705 | 1222.55236 | 4  | 0  | 2819.93371 | 1232.75334 | 665.888007 | 320.463266 |

AnnotatedResults

|            |            |    |    |            |            |            |            |
|------------|------------|----|----|------------|------------|------------|------------|
| 1110.15615 | 673.230077 | 20 | 17 | 1488.14765 | 835.267943 | 2629.37561 | 1156.07702 |
| 2156.8886  | 1111.28599 | 51 | 41 | 2378.36249 | 1096.22761 | 1457.65359 | 876.132405 |
| 998.494966 | 501.222441 | 10 | 0  | 1099.91769 | 511.465057 | 2425.25303 | 749.452812 |
| 715.60719  | 95.57428   | 0  | 0  |            |            |            |            |
| 1995.94198 | 1046.16198 | 8  | 0  | 2594.55588 | 666.665599 | 958.166227 | 647.994585 |
| 1141.18375 | 685.847626 | 20 | 17 | 1497.56043 | 840.227443 | 2621.43318 | 1155.84931 |
| 2217.09868 | 1094.95399 | 49 | 39 | 2458.4815  | 1065.60168 | 1566.63485 | 917.135604 |
| 981.018806 | 487.646445 | 10 | 0  | 1100.60998 | 513.319827 | 2438.19255 | 750.817958 |
| 844.270321 | 351.170081 | 0  | 0  |            |            |            |            |
| 1730.76789 | 1078.89405 | 8  | 0  | 2597.94727 | 664.638628 | 974.091736 | 632.013296 |
| 1141.18375 | 685.847626 | 20 | 17 | 1497.56043 | 840.227443 | 2621.43318 | 1155.84931 |
| 2217.09868 | 1094.95399 | 49 | 43 | 2458.4815  | 1065.60168 | 1566.63485 | 917.135604 |
| 981.018806 | 487.646445 | 10 | 4  | 1100.60998 | 513.319827 | 2438.19255 | 750.817958 |
| 844.270321 | 351.170081 | 0  | 0  |            |            |            |            |
| 1730.76789 | 1078.89405 | 8  | 4  | 2597.94727 | 664.638628 | 974.091736 | 632.013296 |
| 588.451976 | 347.115522 | 1  | 0  | 382.949153 |            | 872.983051 |            |
| 463.68692  | 163.869199 | 3  | 0  | 514.052788 | 278.507569 | 1193.75441 | 478.23199  |
|            |            | 0  | 0  |            |            |            |            |
| 689.86239  | 620.069827 | 0  | 0  |            |            |            |            |
| 893.911251 | 262.793988 | 0  | 0  |            |            |            |            |
| 982.718539 | 679.990999 | 2  | 0  | 727.573577 | 135.613997 | 1263.05051 | 403.43198  |
| 1431.91304 |            | 1  | 0  | 1431.91304 |            | 707.826087 |            |
| 682.539283 | 61.715751  | 0  | 0  |            |            |            |            |
| 893.911251 | 262.793988 | 0  | 0  |            |            |            |            |
| 982.718539 | 679.990999 | 2  | 0  | 727.573577 | 135.613997 | 1263.05051 | 403.43198  |
| 1431.91304 |            | 1  | 0  | 1431.91304 |            | 707.826087 |            |
| 682.539283 | 61.715751  | 0  | 0  |            |            |            |            |
| 1275.3318  | 712.180065 | 1  | 0  | 663.29661  |            | 311.79661  |            |
| 1519.7554  | 1221.98016 | 2  | 0  | 841.233661 | 121.32093  | 434.447136 | 77.347992  |
| 2263.71504 | 2092.63308 | 0  | 0  |            |            |            |            |
| 2311.89895 | 1334.40329 | 0  | 0  |            |            |            |            |
| 1289.54612 | 710.356254 | 1  | 0  | 663.29661  |            | 311.79661  |            |
| 1463.56904 | 1075.86285 | 3  | 0  | 808.644707 | 105.793285 | 1044.80239 | 1046.01188 |
| 1853.83067 | 1319.09425 | 0  | 0  |            |            |            |            |
| 1768.30155 | 1332.97055 | 0  | 0  |            |            |            |            |
| 1289.54612 | 710.356254 | 1  | 0  | 663.29661  |            | 311.79661  |            |
| 1463.56904 | 1075.86285 | 3  | 0  | 808.644707 | 105.793285 | 1044.80239 | 1046.01188 |
| 1853.83067 | 1319.09425 | 0  | 0  |            |            |            |            |
| 1768.30155 | 1332.97055 | 0  | 0  |            |            |            |            |
| 405.50158  | 89.816547  | 3  | 1  | 426.07903  | 97.774892  | 2509.46254 | 691.397871 |
| 691.402895 | 678.018157 | 2  | 1  | 479.474542 | 3.807239   | 415.652839 | 16.939611  |
|            |            | 0  | 0  |            |            |            |            |
|            |            | 0  | 0  |            |            |            |            |
| 597.126    | 318.394    | 0  | 0  |            |            |            |            |
|            |            | 0  | 0  |            |            |            |            |
| 1404.92895 | 1080.23386 | 0  | 0  |            |            |            |            |
| 2031.4     |            | 1  | 0  | 2031.4     |            | 1120.6     |            |
|            |            | 0  | 0  |            |            |            |            |
|            |            | 0  | 0  |            |            |            |            |
| 1404.92895 | 1080.23386 | 0  | 0  |            |            |            |            |
| 2031.4     |            | 1  | 0  | 2031.4     |            | 1120.6     |            |
|            |            | 0  | 0  |            |            |            |            |
| 605.252404 |            | 0  | 0  |            |            |            |            |
| 1835.88732 | 996.621751 | 1  | 0  | 712.60274  |            | 629.315068 |            |
| 1342.08633 |            | 1  | 0  | 1342.08633 |            | 1616.11511 |            |
| 2146.92806 | 1435.99687 | 1  | 0  | 2149.63636 |            | 320.113636 |            |
| 1814.83331 | 1712.23971 | 0  | 0  |            |            |            |            |
| 1790.21127 | 818.849895 | 1  | 0  | 712.60274  |            | 629.315068 |            |
| 1272.56367 | 192.983258 | 2  | 0  | 1272.56367 | 192.983258 | 1164.61293 | 692.738653 |

AnnotatedResults

|            |            |    |    |            |            |            |            |
|------------|------------|----|----|------------|------------|------------|------------|
| 1914.63085 | 1208.27582 | 1  | 0  | 2552.11765 |            | 431.470588 |            |
| 1814.83331 | 1712.23971 | 0  | 0  |            |            |            |            |
| 1790.21127 | 818.849895 | 1  | 0  | 712.60274  |            | 629.315068 |            |
| 1272.56367 | 192.983258 | 2  | 0  | 1272.56367 | 192.983258 | 1164.61293 | 692.738653 |
| 1914.63085 | 1208.27582 | 1  | 0  | 2552.11765 |            | 431.470588 |            |
|            |            | 0  | 0  |            |            |            |            |
|            |            | 0  | 0  |            |            |            |            |
|            |            | 0  | 0  |            |            |            |            |
|            |            | 0  | 0  |            |            |            |            |
|            |            | 0  | 0  |            |            |            |            |
|            |            | 0  | 0  |            |            |            |            |
| 722.602721 | 1012.73217 | 10 | 8  | 875.469265 | 1080.47203 | 1803.34279 | 929.331514 |
| 1034.1823  | 571.226835 | 16 | 7  | 1296.65283 | 1199.74949 | 1948.60752 | 1249.4749  |
| 568.537857 | 253.287543 | 0  | 0  |            |            |            |            |
| 571.923835 | 251.706164 | 0  | 0  |            |            |            |            |
| 2516.44179 | 1816.35047 | 2  | 2  | 4292.7692  | 106.143671 | 4292.7692  | 106.143671 |
| 1629.45354 | 1646.98571 | 5  | 0  | 1388.45226 | 1406.96601 | 1820.94137 | 1167.63191 |
| 1181.8711  | 539.050287 | 14 | 0  | 1577.82719 | 1171.54815 | 2081.55332 | 1296.71628 |
| 946.452069 | 261.567775 | 0  | 0  |            |            |            |            |
| 983.59974  | 55.127325  | 0  | 0  |            |            |            |            |
| 3448.17269 | 1980.79804 | 1  | 0  | 4367.8241  |            | 4367.8241  |            |
| 1629.45354 | 1646.98571 | 5  | 0  | 1388.45226 | 1406.96601 | 1820.94137 | 1167.63191 |
| 1181.8711  | 539.050287 | 14 | 6  | 1577.82719 | 1171.54815 | 2081.55332 | 1296.71628 |
| 946.452069 | 261.567775 | 0  | 0  |            |            |            |            |
| 983.59974  | 55.127325  | 0  | 0  |            |            |            |            |
| 3448.17269 | 1980.79804 | 1  | 0  | 4367.8241  |            | 4367.8241  |            |
| 1397.52445 | 1053.80315 | 3  | 0  | 1715.40136 | 1359.28349 | 1584.13512 | 920.763279 |
| 1111.99966 | 388.587471 | 14 | 9  | 1101.85314 | 306.112156 | 3227.90882 | 1177.45831 |
| 1090.56869 | 293.62301  | 0  | 0  |            |            |            |            |
| 927.855718 | 175.718985 | 0  | 0  |            |            |            |            |
| 1980.69798 | 1420.53336 | 0  | 0  |            |            |            |            |
| 1359.6656  | 1015.90192 | 3  | 0  | 1715.40136 | 1359.28349 | 1584.13512 | 920.763279 |
| 1098.6924  | 381.876042 | 15 | 10 | 1095.24283 | 308.267649 | 3168.15804 | 1198.27918 |
| 896.256944 | 188.967075 | 0  | 0  |            |            |            |            |
| 1052.69972 | 460.855091 | 0  | 0  |            |            |            |            |
| 1797.44756 | 1323.08032 | 0  | 0  |            |            |            |            |
| 1359.6656  | 1015.90192 | 3  | 0  | 1715.40136 | 1359.28349 | 1584.13512 | 920.763279 |
| 1098.6924  | 381.876042 | 15 | 10 | 1095.24283 | 308.267649 | 3168.15804 | 1198.27918 |
| 896.256944 | 188.967075 | 0  | 0  |            |            |            |            |
| 1052.69972 | 460.855091 | 0  | 0  |            |            |            |            |
| 1797.44756 | 1323.08032 | 0  | 0  |            |            |            |            |
| 770.012588 | 842.067667 | 3  | 1  | 1525.77071 | 1543.93961 | 1338.4983  | 639.234016 |
| 780.287782 | 735.176755 | 13 | 4  | 1382.80792 | 1203.82723 | 1387.33716 | 956.457158 |
| 909.537104 | 778.170391 | 0  | 0  |            |            |            |            |
| 559.721558 | 256.137811 | 0  | 0  |            |            |            |            |
| 923.564064 | 526.498258 | 2  | 0  | 1166.2381  | 821.08566  | 511.68609  | 53.072883  |
| 1755.83168 | 1144.00422 | 3  | 0  | 1607.47275 | 1461.70814 | 1368.14954 | 641.458065 |
| 1480.23428 | 1010.03694 | 11 | 0  | 2074.36886 | 1281.68539 | 1574.85506 | 1195.5543  |
| 1265.55377 | 815.172407 | 1  | 0  | 951.845714 |            | 302.9      |            |
| 1140.55772 |            | 0  | 0  |            |            |            |            |
| 1014.9     | 284.766    | 1  | 0  | 1165.12    |            | 413.6      |            |
| 1755.83168 | 1144.00422 | 3  | 0  | 1607.47275 | 1461.70814 | 1368.14954 | 641.458065 |
| 1480.23428 | 1010.03694 | 11 | 0  | 2074.36886 | 1281.68539 | 1574.85506 | 1195.5543  |
| 1265.55377 | 815.172407 | 1  | 0  | 951.845714 |            | 302.9      |            |
| 1140.55772 |            | 0  | 0  |            |            |            |            |
| 1014.89667 | 284.76574  | 1  | 0  | 1165.12    |            | 413.6      |            |
| 1523.38448 | 991.215227 | 2  | 0  | 1151.19577 | 198.498716 | 2547.64021 | 381.643114 |
| 974.362605 | 554.712932 | 6  | 0  | 1561.73874 | 907.200313 | 2171.13187 | 1393.41919 |

AnnotatedResults

|            |            |   |   |            |            |            |            |
|------------|------------|---|---|------------|------------|------------|------------|
| 1585.37331 | 753.660849 | 2 | 0 | 1448.77482 | 249.422072 | 526.389104 | 45.279831  |
| 1129.50453 | 549.877427 | 0 | 0 |            |            |            |            |
| 1316.81022 | 96.326122  | 1 | 0 | 1248.69737 |            | 423.065789 |            |
| 1612.77089 | 1039.0948  | 2 | 0 | 1151.19577 | 198.498716 | 2547.64021 | 381.643114 |
| 1251.26443 | 856.250036 | 9 | 0 | 2049.61308 | 1007.22776 | 1722.31683 | 1238.4072  |
| 1507.0143  | 955.63823  | 2 | 0 | 1448.77482 | 249.422072 | 526.389104 | 45.279831  |
| 1351.05385 | 488.059865 | 1 | 0 | 925.883721 |            | 685.186047 |            |
| 1316.81022 | 96.326122  | 1 | 0 | 1248.69737 |            | 423.065789 |            |
| 1612.77089 | 1039.0948  | 2 | 0 | 1151.19577 | 198.498716 | 2547.64021 | 381.643114 |
| 1251.26443 | 856.250036 | 9 | 0 | 2049.61308 | 1007.22776 | 1722.31683 | 1238.4072  |
| 1507.0143  | 955.63823  | 2 | 0 | 1448.77482 | 249.422072 | 526.389104 | 45.279831  |
| 1351.05385 | 488.059865 | 1 | 0 | 925.883721 |            | 685.186047 |            |
| 1316.81022 | 96.326122  | 1 | 0 | 1248.69737 |            | 423.065789 |            |
| 3080.61037 | 2042.03566 | 2 | 0 | 2048.43801 | 1395.54313 | 630.055342 | 354.169057 |
| 1217.76186 | 627.986354 | 1 | 0 | 1913.89899 |            | 1911.49495 |            |
| 633.41     | 346.845    | 1 | 0 | 1302.17    |            | 403.019    |            |
|            |            | 0 | 0 |            |            |            |            |
| 3720.72747 | 1587.51072 | 4 | 0 | 2961.45565 | 1373.39907 | 532.720088 | 251.512327 |
| 1214.39473 | 629.397214 | 1 | 0 | 1913.89899 |            | 1911.49495 |            |
| 953.235284 | 242.281522 | 1 | 0 | 1302.16981 |            | 403.018868 |            |
|            |            | 0 | 0 |            |            |            |            |
| 3720.72747 | 1587.51072 | 4 | 0 | 2961.45565 | 1373.39907 | 532.720088 | 251.512327 |
| 1214.39473 | 629.397214 | 1 | 0 | 1913.89899 |            | 1911.49495 |            |
| 953.235284 | 242.281522 | 1 | 0 | 1302.16981 |            | 403.018868 |            |
|            |            | 0 | 0 |            |            |            |            |
|            |            | 0 | 0 |            |            |            |            |
| 620.333333 |            | 0 | 0 |            |            |            |            |
| 1286.78408 | 465.866229 | 0 | 0 |            |            |            |            |
|            |            | 0 | 0 |            |            |            |            |
| 1088.58566 | 784.271483 | 1 | 0 | 1993.72881 |            | 596.745763 |            |
| 620.333333 |            | 0 | 0 |            |            |            |            |
| 1055.01343 | 295.260458 | 0 | 0 |            |            |            |            |
|            |            | 0 | 0 |            |            |            |            |
| 1088.58566 | 784.271483 | 1 | 0 | 1993.72881 |            | 596.745763 |            |
| 620.333333 |            | 0 | 0 |            |            |            |            |
| 1055.01343 | 295.260458 | 0 | 0 |            |            |            |            |
|            |            | 0 | 0 |            |            |            |            |
| 546.598929 | 431.804115 | 3 | 0 | 1735.03198 | 713.094822 | 1179.21044 | 214.588158 |
| 365.83536  | 93.385038  | 1 | 1 | 1104.10714 |            | 348.75     |            |
| 432.616889 | 272.110522 | 0 | 0 |            |            |            |            |
| 996.536683 | 584.029712 | 3 | 0 | 1739.49939 | 735.520386 | 1176.88989 | 198.256223 |
| 1041.30769 | 54.719186  | 1 | 0 | 1080       |            | 340.639535 |            |
| 1077.00403 | 450.436332 | 0 | 0 |            |            |            |            |
| 996.536683 | 584.029712 | 3 | 0 | 1739.49939 | 735.520386 | 1176.88989 | 198.256223 |
| 1041.30769 | 54.719186  | 1 | 0 | 1080       |            | 340.639535 |            |
| 1077.00403 | 450.436332 | 0 | 0 |            |            |            |            |
| 1135.07535 | 614.380383 | 3 | 0 | 1604.5164  | 729.29794  | 1503.40899 | 1164.0125  |
| 1171.81061 | 769.835724 | 1 | 0 | 1716.16667 |            | 935.666667 |            |
| 926.103333 | 297.273621 | 2 | 0 | 1431.28705 | 130.753294 | 373.059105 | 49.341364  |
| 1139.14998 | 624.537196 | 3 | 0 | 1614.02386 | 745.76055  | 1514.24074 | 1181.30204 |
| 1171.81061 | 769.835724 | 1 | 0 | 1716.16667 |            | 935.666667 |            |
| 909.833357 | 295.547373 | 2 | 0 | 1431.28705 | 130.753294 | 373.059105 | 49.341364  |
| 1139.14998 | 624.537196 | 3 | 0 | 1614.02386 | 745.76055  | 1514.24074 | 1181.30204 |
| 1171.81061 | 769.835724 | 1 | 0 | 1716.16667 |            | 935.666667 |            |
| 909.833357 | 295.547373 | 2 | 0 | 1431.28705 | 130.753294 | 373.059105 | 49.341364  |
| 532.191791 | 243.170416 | 0 | 0 |            |            |            |            |
| 1226.70151 | 517.920814 | 0 | 0 |            |            |            |            |
| 307.184615 |            | 0 | 0 |            |            |            |            |

AnnotatedResults

|            |            |   |   |            |            |            |            |
|------------|------------|---|---|------------|------------|------------|------------|
| 731.27638  | 264.621701 | 0 | 0 |            |            |            |            |
|            |            | 0 | 0 |            |            |            |            |
| 1226.70151 | 517.920814 | 0 | 0 |            |            |            |            |
|            |            | 0 | 0 |            |            |            |            |
| 907.286788 | 200.143983 | 0 | 0 |            |            |            |            |
|            |            | 0 | 0 |            |            |            |            |
| 1226.70151 | 517.920814 | 0 | 0 |            |            |            |            |
|            |            | 0 | 0 |            |            |            |            |
| 907.286788 | 200.143983 | 0 | 0 |            |            |            |            |
| 1434.11661 | 31.87307   | 0 | 0 |            |            |            |            |
|            |            | 0 | 0 |            |            |            |            |
| 675.289175 | 43.72732   | 0 | 0 |            |            |            |            |
| 798.936059 | 86.49087   | 0 | 0 |            |            |            |            |
| 1473.32714 | 23.578988  | 0 | 0 |            |            |            |            |
| 914.92381  | 206.300087 | 0 | 0 |            |            |            |            |
| 1104.05661 | 805.340745 | 1 | 0 | 968.857143 |            | 1073.45963 |            |
| 1185.9939  | 673.187684 | 0 | 0 |            |            |            |            |
| 1473.32714 | 23.578988  | 0 | 0 |            |            |            |            |
| 914.92381  | 206.300087 | 0 | 0 |            |            |            |            |
| 1104.05661 | 805.340745 | 1 | 0 | 968.857143 |            | 1073.45963 |            |
| 1185.9939  | 673.187684 | 0 | 0 |            |            |            |            |
| 419.91938  | 136.998732 | 0 | 0 |            |            |            |            |
| 464.729938 | 217.325589 | 0 | 0 |            |            |            |            |
| 437.55197  | 125.965608 | 0 | 0 |            |            |            |            |
| 428.364605 | 114.75428  | 0 | 0 |            |            |            |            |
| 799.418041 | 365.744033 | 1 | 0 | 1626.34146 |            | 332.5      |            |
| 825.347416 | 228.651304 | 0 | 0 |            |            |            |            |
| 709.688985 | 48.294418  | 0 | 0 |            |            |            |            |
| 703.101273 | 61.551991  | 0 | 0 |            |            |            |            |
| 799.418041 | 365.744033 | 1 | 0 | 1626.34146 |            | 332.5      |            |
| 825.347416 | 228.651304 | 0 | 0 |            |            |            |            |
| 709.688985 | 48.294418  | 0 | 0 |            |            |            |            |
| 703.101273 | 61.551991  | 0 | 0 |            |            |            |            |
| 780.308505 | 261.433363 | 0 | 0 |            |            |            |            |
| 836.408387 | 318.421769 | 0 | 0 |            |            |            |            |
| 1180.847   | 449.611827 | 3 | 0 | 1273.51028 | 501.704381 | 496.417244 | 127.055714 |
| 711.244026 | 91.414013  | 0 | 0 |            |            |            |            |
| 969.631351 | 522.93147  | 0 | 0 |            |            |            |            |
| 802.480978 | 285.71199  | 0 | 0 |            |            |            |            |
| 1202.24442 | 524.031151 | 4 | 0 | 1421.50155 | 502.475983 | 686.795325 | 392.514049 |
| 710.525691 | 91.874841  | 0 | 0 |            |            |            |            |
| 969.631351 | 522.93147  | 0 | 0 |            |            |            |            |
| 802.480978 | 285.71199  | 0 | 0 |            |            |            |            |
| 1202.24442 | 524.031151 | 4 | 0 | 1421.50155 | 502.475983 | 686.795325 | 392.514049 |
| 710.525691 | 91.874841  | 0 | 0 |            |            |            |            |
| 581.395356 | 68.518785  | 0 | 0 |            |            |            |            |
| 940.445851 | 927.083935 | 0 | 0 |            |            |            |            |
| 1224.48673 | 896.623844 | 2 | 1 | 1432.85069 | 129.248594 | 575.190121 | 364.963972 |
|            |            | 0 | 0 |            |            |            |            |
| 2026.30843 | 1931.60051 | 0 | 0 |            |            |            |            |
|            |            | 0 | 0 |            |            |            |            |
| 1617.56062 | 834.16501  | 3 | 0 | 1453.90046 | 98.396536  | 508.878381 | 282.473169 |
|            |            | 0 | 0 |            |            |            |            |
| 2026.30843 | 1931.60051 | 0 | 0 |            |            |            |            |
|            |            | 0 | 0 |            |            |            |            |
| 1617.56062 | 834.16501  | 3 | 0 | 1453.90046 | 98.396536  | 508.878381 | 282.473169 |
|            |            | 0 | 0 |            |            |            |            |
| 1406.29288 | 1224.84937 | 0 | 0 |            |            |            |            |

AnnotatedResults

|            |            |     |     |            |            |            |            |
|------------|------------|-----|-----|------------|------------|------------|------------|
| 1139.88498 | 464.534883 | 0   | 0   |            |            |            |            |
| 1374.27701 | 821.302525 | 0   | 0   |            |            |            |            |
| 1100.45122 |            | 0   | 0   |            |            |            |            |
| 2184.54459 | 1478.09557 | 1   | 0   | 4553.97245 |            | 482.85124  |            |
| 1077.11619 | 307.697124 | 0   | 0   |            |            |            |            |
| 1935.5273  | 980.578261 | 0   | 0   |            |            |            |            |
| 1100.45122 |            | 0   | 0   |            |            |            |            |
| 2184.54459 | 1478.09557 | 1   | 0   | 4553.97245 |            | 482.85124  |            |
| 1077.11619 | 307.697124 | 0   | 0   |            |            |            |            |
| 1935.5273  | 980.578261 | 0   | 0   |            |            |            |            |
| 1100.45122 |            | 0   | 0   |            |            |            |            |
| 1039.84264 | 1156.28648 | 139 | 122 | 862.444691 | 853.775434 | 1829.61009 | 857.203713 |
| 946.782581 | 1062.44825 | 35  | 17  | 1281.95649 | 1331.43393 | 1197.58862 | 705.361043 |
| 907.308427 | 782.177372 | 3   | 2   | 1598.15709 | 612.600154 | 588.54229  | 230.596018 |
| 1992.89712 | 1393.31765 | 61  | 41  | 1546.03717 | 1125.45722 | 1871.3206  | 932.790584 |
| 1844.10716 | 1291.74927 | 19  | 1   | 2058.30522 | 1409.60773 | 729.841464 | 477.521458 |
| 1462.59797 | 838.357295 | 3   | 1   | 1616.02144 | 608.915917 | 578.589826 | 239.104741 |
| 1992.89712 | 1393.31765 | 61  | 43  | 1546.03717 | 1125.45722 | 1871.3206  | 932.790584 |
| 1844.10716 | 1291.74927 | 19  | 3   | 2058.30522 | 1409.60773 | 729.841464 | 477.521458 |
| 1462.59797 | 838.357295 | 3   | 2   | 1616.02144 | 608.915917 | 578.589826 | 239.104741 |
| 1967.8243  | 1336.73638 | 95  | 56  | 1581.52075 | 1109.69167 | 2409.7198  | 1311.24536 |
| 1691.28289 | 1276.70519 | 17  | 1   | 1885.27159 | 1496.62795 | 1032.66575 | 592.009173 |
| 1342.98548 | 715.096136 | 7   | 2   | 976.458975 | 285.678766 | 462.460619 | 161.262069 |
| 1946.25235 | 1331.20762 | 101 | 61  | 1574.26841 | 1114.27741 | 2425.01385 | 1305.77886 |
| 1704.72134 | 1239.76227 | 18  | 1   | 1842.24127 | 1470.02865 | 983.127025 | 606.49383  |
| 1412.49964 | 773.836283 | 9   | 2   | 1116.30217 | 392.504165 | 525.199377 | 221.331705 |
| 1946.25235 | 1331.20762 | 101 | 75  | 1574.26841 | 1114.27741 | 2425.01385 | 1305.77886 |
| 1704.72134 | 1239.76227 | 18  | 3   | 1842.24127 | 1470.02865 | 983.127025 | 606.49383  |
| 1412.49964 | 773.836283 | 9   | 6   | 1116.30217 | 392.504165 | 525.199377 | 221.331705 |
| 748.60295  | 906.269592 | 13  | 5   | 651.899135 | 577.872269 | 1304.48499 | 530.580661 |
| 1322.57505 | 1318.66908 | 57  | 54  | 1888.13224 | 1447.22444 | 1344.65073 | 738.423316 |
| 1204.33895 | 1246.5723  | 39  | 26  | 1932.88458 | 1497.0337  | 1340.38715 | 841.141895 |
| 738.468733 | 570.643792 | 45  | 35  | 845.64265  | 577.446402 | 1383.70809 | 728.716664 |
| 614.852617 | 416.469631 | 2   | 0   | 1361.2968  | 1000.20178 | 455.111488 | 25.939868  |
| 2396.84748 | 1478.6992  | 10  | 6   | 2676.05702 | 1518.65323 | 817.098024 | 539.23497  |
| 2206.39141 | 1446.28574 | 54  | 49  | 2341.88942 | 1444.50683 | 1470.98177 | 867.158519 |
| 2059.29266 | 1291.56645 | 27  | 0   | 2532.93748 | 1382.86674 | 1410.39452 | 973.049279 |
| 1146.13539 | 596.2926   | 23  | 0   | 1200.05382 | 594.070896 | 1569.8707  | 822.048452 |
| 1167.57296 | 806.5975   | 3   | 0   | 1768.19545 | 998.164607 | 441.729127 | 30.447854  |
| 2396.84748 | 1478.6992  | 10  | 6   | 2676.05702 | 1518.65323 | 817.098024 | 539.23497  |
| 2206.39141 | 1446.28574 | 54  | 49  | 2341.88942 | 1444.50683 | 1470.98177 | 867.158519 |
| 2059.29266 | 1291.56645 | 27  | 12  | 2532.93748 | 1382.86674 | 1410.39452 | 973.049279 |
| 1146.13539 | 596.2926   | 23  | 15  | 1200.05382 | 594.070896 | 1569.8707  | 822.048452 |
| 1167.57296 | 806.5975   | 3   | 0   | 1768.19545 | 998.164607 | 441.729127 | 30.447854  |
| 2022.06195 | 1567.89381 | 14  | 0   | 1991.87829 | 1648.65577 | 1653.08957 | 1229.78084 |
| 2400.44854 | 1586.22658 | 49  | 44  | 2561.33391 | 1671.87521 | 2232.75449 | 1381.67153 |
| 2061.29992 | 1550.86016 | 41  | 0   | 2560.62584 | 1707.80932 | 1710.48207 | 1113.61777 |
| 1151.28012 | 705.925657 | 23  | 4   | 1226.80947 | 732.635175 | 2062.74641 | 1183.55003 |
| 1219.2605  | 540.650003 | 1   | 0   | 1035.504   |            | 330.344    |            |
| 2031.89971 | 1565.37603 | 12  | 0   | 2159.86534 | 1714.71741 | 1635.69293 | 1302.12256 |
| 2285.30545 | 1559.43731 | 51  | 45  | 2536.9241  | 1656.5194  | 2216.69267 | 1386.53957 |
| 1981.3534  | 1501.63343 | 44  | 1   | 2490.95333 | 1683.00157 | 1665.00289 | 1091.69966 |
| 1149.16223 | 743.1103   | 25  | 6   | 1204.02889 | 721.424002 | 2081.52925 | 1151.35775 |
| 1257.091   | 536.671532 | 1   | 0   | 1664.5055  |            | 632.362637 |            |
| 2031.89971 | 1565.37603 | 12  | 7   | 2159.86534 | 1714.71741 | 1635.69293 | 1302.12256 |
| 2285.30545 | 1559.43731 | 51  | 45  | 2536.9241  | 1656.5194  | 2216.69267 | 1386.53957 |
| 1981.3534  | 1501.63343 | 44  | 16  | 2490.95333 | 1683.00157 | 1665.00289 | 1091.69966 |
| 1149.16223 | 743.1103   | 25  | 13  | 1204.02889 | 721.424002 | 2081.52925 | 1151.35775 |

AnnotatedResults

|            |            |     |     |            |            |            |            |
|------------|------------|-----|-----|------------|------------|------------|------------|
| 1257.091   | 536.671532 | 1   | 0   | 1664.5055  |            | 632.362637 |            |
| 1216.83995 | 1189.87532 | 95  | 79  | 1631.27541 | 1323.16372 | 1643.32454 | 851.611843 |
| 1204.70804 | 1343.32241 | 1   | 0   | 2348.85106 |            | 1833.95745 |            |
| 503.175674 | 275.801596 | 0   | 0   |            |            |            |            |
| 798.272979 | 1074.32961 | 15  | 11  | 1817.82012 | 1806.20548 | 1520.25379 | 952.578038 |
| 1850.19979 | 1238.20208 | 76  | 46  | 2017.82245 | 1277.10801 | 1722.28482 | 857.291189 |
| 1667.94591 | 814.218115 | 1   | 0   | 2348.85106 |            | 1833.95745 |            |
| 1049.50722 | 323.854392 | 0   | 0   |            |            |            |            |
| 1791.69242 | 1768.03166 | 12  | 0   | 2179.45205 | 1899.02918 | 1788.15777 | 868.058348 |
| 1850.19979 | 1238.20208 | 76  | 61  | 2017.82245 | 1277.10801 | 1722.28482 | 857.291189 |
| 1667.94591 | 814.218115 | 1   | 0   | 2348.85106 |            | 1833.95745 |            |
| 1049.50722 | 323.854392 | 0   | 0   |            |            |            |            |
| 1791.69242 | 1768.03166 | 12  | 0   | 2179.45205 | 1899.02918 | 1788.15777 | 868.058348 |
| 1800.42414 | 1241.34691 | 82  | 58  | 1990.40213 | 1304.43094 | 1963.08761 | 1014.40614 |
| 1315.4984  | 843.389877 | 1   | 0   | 767.629428 |            | 546.920981 |            |
| 1219.58945 | 472.046193 | 0   | 0   |            |            |            |            |
| 1305.32246 | 1271.85492 | 12  | 0   | 2137.70168 | 1676.69966 | 2736.81458 | 1307.76524 |
| 1806.04711 | 1243.77254 | 84  | 60  | 2017.10085 | 1302.37777 | 1954.01046 | 1009.79619 |
| 1339.53123 | 950.472308 | 1   | 0   | 763.538874 |            | 538.659517 |            |
| 1249.98257 | 495.13511  | 0   | 0   |            |            |            |            |
| 1279.43537 | 1259.49321 | 12  | 0   | 2146.5688  | 1673.88378 | 2739.96774 | 1293.6223  |
| 1806.04711 | 1243.77254 | 84  | 65  | 2017.10085 | 1302.37777 | 1954.01046 | 1009.79619 |
| 1339.53123 | 950.472308 | 1   | 0   | 763.538874 |            | 538.659517 |            |
| 1249.98257 | 495.13511  | 0   | 0   |            |            |            |            |
| 1279.43537 | 1259.49321 | 12  | 6   | 2146.5688  | 1673.88378 | 2739.96774 | 1293.6223  |
| 607.987312 | 434.31807  | 1   | 0   | 1168.96296 |            | 1008.66667 |            |
| 907.122009 | 767.165778 | 4   | 0   | 830.832027 | 214.643276 | 677.579061 | 127.545763 |
| 766.619072 | 781.319762 | 4   | 1   | 653.274738 | 358.010893 | 400.030211 | 111.981904 |
| 1717.87701 | 1721.01888 | 131 | 120 | 1542.02594 | 1541.47639 | 1537.62107 | 877.737244 |
| 974.003814 | 334.654548 | 2   | 0   | 1296.36673 | 180.176132 | 757.754098 | 354.843957 |
| 1395.47804 | 849.577189 | 3   | 0   | 857.209524 | 175.237766 | 652.477631 | 182.992108 |
| 1375.07925 | 1136.66941 | 1   | 0   | 1154.27907 |            | 565.116279 |            |
| 2700.39668 | 1673.10329 | 75  | 71  | 2535.59854 | 1541.01393 | 1198.29832 | 834.589687 |
| 974.003814 | 334.654548 | 2   | 0   | 1296.36673 | 180.176132 | 757.754098 | 354.843957 |
| 1395.47804 | 849.577189 | 3   | 0   | 857.209524 | 175.237766 | 652.477631 | 182.992108 |
| 1375.07925 | 1136.66941 | 1   | 0   | 1154.27907 |            | 565.116279 |            |
| 2700.39668 | 1673.10329 | 75  | 71  | 2535.59854 | 1541.01393 | 1198.29832 | 834.589687 |
| 1778.41634 | 1200.63657 | 4   | 0   | 1529.35041 | 1296.27548 | 1188.06689 | 999.19316  |
| 1614.29677 | 1017.23865 | 2   | 0   | 1061.97684 | 373.705327 | 1362.44768 | 742.709547 |
| 1359.0501  | 817.645572 | 0   | 0   |            |            |            |            |
| 2328.38388 | 1358.58996 | 78  | 69  | 2228.18143 | 1350.08647 | 1525.11792 | 1002.00293 |
| 1394.0853  | 991.457704 | 4   | 0   | 839.751187 | 350.094975 | 617.949614 | 202.048825 |
| 1734.67072 | 1182.91316 | 1   | 0   | 1326.22642 |            | 1887.62264 |            |
| 1401.79877 | 839.434714 | 1   | 0   | 1580.78049 |            | 950.243902 |            |
| 2262.42063 | 1362.12143 | 82  | 80  | 2165.4149  | 1356.31963 | 1557.37824 | 1037.4895  |
| 1394.0853  | 991.457704 | 4   | 0   | 839.751187 | 350.094975 | 617.949614 | 202.048825 |
| 1734.67072 | 1182.91316 | 1   | 0   | 1326.22642 |            | 1887.62264 |            |
| 1401.79877 | 839.434714 | 1   | 0   | 1580.78049 |            | 950.243902 |            |
| 2262.42063 | 1362.12143 | 82  | 80  | 2165.4149  | 1356.31963 | 1557.37824 | 1037.4895  |
| 494.054074 | 269.896842 | 5   | 3   | 759.51528  | 543.052932 | 1547.16496 | 636.997355 |
| 685.05804  | 337.375037 | 1   | 0   | 461.217172 |            | 555.929293 |            |
| 676.776692 | 510.297456 | 0   | 0   |            |            |            |            |
| 553.852579 | 242.334788 | 0   | 0   |            |            |            |            |
| 1446.86159 | 980.390078 | 2   | 0   | 1300.38896 | 593.349614 | 1874.62098 | 1092.47605 |
| 1031.46376 | 275.11132  | 0   | 0   |            |            |            |            |
| 1018.3     | 640.056    | 0   | 0   |            |            |            |            |
| 883.773046 | 141.777871 | 0   | 0   |            |            |            |            |
| 1446.86159 | 980.390078 | 2   | 0   | 1300.38896 | 593.349614 | 1874.62098 | 1092.47605 |

## AnnotatedResults

|            |            |     |    |            |            |            |            |  |
|------------|------------|-----|----|------------|------------|------------|------------|--|
| 1031.46376 | 275.11132  | 0   | 0  |            |            |            |            |  |
| 1018.29602 | 640.055601 | 0   | 0  |            |            |            |            |  |
| 883.773046 | 141.777871 | 0   | 0  |            |            |            |            |  |
| 1309.15873 | 721.999384 | 6   | 0  | 1077.73274 | 348.667399 | 2260.44335 | 1419.66918 |  |
| 986.608758 | 457.044652 | 1   | 0  | 1907.06897 |            | 540.189655 |            |  |
| 1507.26889 | 880.085301 | 2   | 0  | 729.464674 | 18.158041  | 1098.87636 | 819.97678  |  |
| 932.172743 | 439.216993 | 0   | 0  |            |            |            |            |  |
| 1312.73022 | 720.419666 | 6   | 0  | 1083.08998 | 347.688394 | 2276.63302 | 1437.84289 |  |
| 968.274367 | 422.827813 | 1   | 0  | 1907.06897 |            | 540.189655 |            |  |
| 1334.85425 | 814.585922 | 2   | 0  | 729.464674 | 18.158041  | 1098.87636 | 819.97678  |  |
| 932.709413 | 353.171006 | 0   | 0  |            |            |            |            |  |
| 1312.73022 | 720.419666 | 6   | 3  | 1083.08998 | 347.688394 | 2276.63302 | 1437.84289 |  |
| 968.274367 | 422.827813 | 1   | 0  | 1907.06897 |            | 540.189655 |            |  |
| 1334.85425 | 814.585922 | 2   | 0  | 729.464674 | 18.158041  | 1098.87636 | 819.97678  |  |
| 932.709413 | 353.171006 | 0   | 0  |            |            |            |            |  |
| 714.103931 | 501.261872 | 35  | 24 | 803.053805 | 534.045432 | 2158.75447 | 1142.42656 |  |
| 541.3208   | 335.523119 | 7   | 4  | 557.015846 | 133.266162 | 1389.81976 | 430.805305 |  |
| 659.559281 | 586.184464 | 0   | 0  |            |            |            |            |  |
| 1451.02344 | 1156.39563 | 2   | 1  | 1672.75    | 1688.45314 | 782.209524 | 657.434213 |  |
| 1124.10099 | 593.857739 | 20  | 13 | 1110.07753 | 599.81021  | 2662.70211 | 1248.48316 |  |
| 822.036308 | 407.667691 | 5   | 0  | 652.559776 | 60.770166  | 2289.44364 | 1125.22395 |  |
| 1302.81733 | 577.477629 | 0   | 0  |            |            |            |            |  |
| 2085.4351  | 1003.85652 | 1   | 1  | 2868.48    |            | 313.6      |            |  |
| 1124.10099 | 593.857739 | 20  | 13 | 1110.07753 | 599.81021  | 2662.70211 | 1248.48316 |  |
| 822.036308 | 407.667691 | 5   | 2  | 652.559776 | 60.770166  | 2289.44364 | 1125.22395 |  |
| 1302.81733 | 577.477629 | 0   | 0  |            |            |            |            |  |
| 2085.4351  | 1003.85652 | 1   | 1  | 2868.48    |            | 313.6      |            |  |
| 1418.2233  | 1634.42443 | 7   | 0  | 1879.32596 | 2127.89322 | 2230.69348 | 1387.6818  |  |
| 1413.71226 | 248.6014   | 0   | 0  |            |            |            |            |  |
| 1724.03686 | 1000.20606 | 2   | 2  | 2498.47889 | 168.714107 | 510.027778 | 117.419009 |  |
| 1878.67811 | 2141.7421  | 5   | 0  | 2465.22576 | 2515.58328 | 1638.42408 | 1053.30754 |  |
| 1065.91491 | 334.212837 | 0   | 0  |            |            |            |            |  |
| 1732.00446 | 998.162788 | 2   | 2  | 2703.80556 | 121.66165  | 546.527778 | 65.800214  |  |
| 1878.67811 | 2141.7421  | 5   | 0  | 2465.22576 | 2515.58328 | 1638.42408 | 1053.30754 |  |
| 1065.91491 | 334.212837 | 0   | 0  |            |            |            |            |  |
| 1732.00446 | 998.162788 | 2   | 2  | 2703.80556 | 121.66165  | 546.527778 | 65.800214  |  |
| 655.847595 | 381.073903 | 22  | 8  | 818.113557 | 476.465559 | 697.410206 | 393.22081  |  |
| 625.284    | 454.967    | 35  | 19 | 663.258    | 522.04     | 853.986    | 383.479    |  |
| 581.622574 | 328.585423 | 101 | 78 | 619.121945 | 362.742274 | 943.639304 | 413.286121 |  |
| 978.53256  | 355.621727 | 16  | 0  | 1036.87986 | 398.013513 | 648.025399 | 411.447273 |  |
| 956.781611 | 645.431631 | 13  | 2  | 1023.23772 | 723.909464 | 773.596113 | 421.029938 |  |
| 903.630187 | 388.317088 | 35  | 17 | 944.901369 | 423.293302 | 1023.21478 | 527.278283 |  |
| 978.53256  | 355.621727 | 16  | 0  | 1036.87986 | 398.013513 | 648.025399 | 411.447273 |  |
| 956.781611 | 645.431631 | 13  | 2  | 1023.23772 | 723.909464 | 773.596113 | 421.029938 |  |
| 903.630187 | 388.317088 | 35  | 17 | 944.901369 | 423.293302 | 1023.21478 | 527.278283 |  |
| 1125.86824 | 574.889359 | 15  | 0  | 1185.74788 | 612.133426 | 914.793084 | 554.811173 |  |
| 862.666102 | 294.695706 | 26  | 1  | 867.208503 | 316.146869 | 841.959066 | 405.331421 |  |
| 929.221763 | 369.079419 | 36  | 14 | 941.650694 | 378.303055 | 1089.20937 | 648.63719  |  |
| 1159.2634  | 540.864076 | 15  | 0  | 1242.19151 | 598.881927 | 877.474965 | 575.518734 |  |
| 932.475307 | 394.025891 | 34  | 1  | 958.348299 | 423.497815 | 868.301542 | 452.089415 |  |
| 957.094201 | 372.03511  | 37  | 13 | 965.557967 | 383.970401 | 1064.70598 | 649.185002 |  |
| 1159.2634  | 540.864076 | 15  | 0  | 1242.19151 | 598.881927 | 877.474965 | 575.518734 |  |
| 932.475307 | 394.025891 | 34  | 1  | 958.348299 | 423.497815 | 868.301542 | 452.089415 |  |
| 957.094201 | 372.03511  | 37  | 15 | 965.557967 | 383.970401 | 1064.70598 | 649.185002 |  |
| 629.847775 | 506.812959 | 2   | 0  | 610.202199 | 213.538684 | 963.438568 | 622.847513 |  |



AnnotatedResults

|            |            |    |    |            |            |            |            |
|------------|------------|----|----|------------|------------|------------|------------|
| 759.593    | 865.023    | 4  | 1  | 378.411    | 25.1922    | 1321.24    | 576.698    |
| 1039.18605 |            | 0  | 0  |            |            |            |            |
| 727.884248 | 1012.29388 | 1  | 0  | 370.75     |            | 1127.95833 |            |
| 1264.86446 | 675.218608 | 1  | 0  | 974.117647 |            | 1898.82353 |            |
| 1804.52315 | 1199.15902 | 0  | 0  |            |            |            |            |
| 1039.18605 |            | 0  | 0  |            |            |            |            |
| 2020.85761 | 1899.88675 | 0  | 0  |            |            |            |            |
| 1264.86446 | 675.218608 | 1  | 0  | 974.117647 |            | 1898.82353 |            |
| 1804.52315 | 1199.15902 | 0  | 0  |            |            |            |            |
| 1039.18605 |            | 0  | 0  |            |            |            |            |
| 2020.85761 | 1899.88675 | 0  | 0  |            |            |            |            |
| 1205.08824 | 633.910293 | 1  | 0  | 693.789474 |            | 1697.89474 |            |
| 1530.39429 | 1281.08357 | 0  | 0  |            |            |            |            |
|            |            | 0  | 0  |            |            |            |            |
| 1547.59346 | 1295.79013 | 0  | 0  |            |            |            |            |
| 1187.56449 | 597.917289 | 3  | 0  | 1159.16512 | 687.016878 | 818.628311 | 762.294812 |
| 1604.1689  | 1100.15755 | 2  | 0  | 1939.02792 | 733.644163 | 1488.69226 | 666.495307 |
| 836.410256 |            | 0  | 0  |            |            |            |            |
| 1346.40466 | 1166.71013 | 0  | 0  |            |            |            |            |
| 1187.56449 | 597.917289 | 3  | 0  | 1159.16512 | 687.016878 | 818.628311 | 762.294812 |
| 1604.1689  | 1100.15755 | 2  | 0  | 1939.02792 | 733.644163 | 1488.69226 | 666.495307 |
| 836.410256 |            | 0  | 0  |            |            |            |            |
| 1346.40466 | 1166.71013 | 0  | 0  |            |            |            |            |
| 548.510665 | 322.747113 | 14 | 11 | 562.025081 | 371.734381 | 1141.44288 | 822.475905 |
| 583.014537 | 540.165865 | 1  | 0  | 434.777778 |            | 320.181818 |            |
| 560.112338 | 374.628455 | 8  | 0  | 1038.88117 | 832.817312 | 978.082728 | 649.404153 |
| 686.864836 | 602.822683 | 1  | 0  | 1755.34021 |            | 507.030928 |            |
| 809.28986  | 1172.72676 | 0  | 0  |            |            |            |            |
| 934.760492 | 430.708497 | 1  | 0  | 690.515267 |            | 2698.20611 |            |
| 1197.95644 | 844.514975 | 0  | 0  |            |            |            |            |
| 1167.80608 | 682.638042 | 7  | 0  | 1706.57493 | 945.914636 | 740.762498 | 566.374684 |
| 1244.6701  | 722.196586 | 1  | 0  | 1755.34021 |            | 507.030928 |            |
| 2385.22228 | 2481.73014 | 0  | 0  |            |            |            |            |
| 934.760492 | 430.708497 | 1  | 0  | 690.515267 |            | 2698.20611 |            |
| 1197.95644 | 844.514975 | 0  | 0  |            |            |            |            |
| 1167.80608 | 682.638042 | 7  | 0  | 1706.57493 | 945.914636 | 740.762498 | 566.374684 |
| 1244.6701  | 722.196586 | 1  | 0  | 1755.34021 |            | 507.030928 |            |
| 2385.22228 | 2481.73014 | 0  | 0  |            |            |            |            |
| 1014.27092 | 588.230636 | 2  | 0  | 657.914449 | 28.163283  | 3085.85057 | 179.67664  |
| 1275.34332 | 806.865949 | 0  | 0  |            |            |            |            |
| 1130.80622 | 708.977735 | 6  | 0  | 1766.45438 | 1111.17462 | 841.806336 | 504.217641 |
| 814.231097 | 205.071873 | 0  | 0  |            |            |            |            |
| 2001.75821 | 865.206432 | 0  | 0  |            |            |            |            |
| 1034.55478 | 572.842633 | 3  | 0  | 749.462574 | 159.811648 | 2189.67652 | 1557.40991 |
| 1453.30875 | 865.074021 | 0  | 0  |            |            |            |            |
| 1103.13219 | 689.479126 | 6  | 0  | 1758.49973 | 1117.80827 | 838.291952 | 507.581804 |
| 1020.38371 | 527.162888 | 1  | 0  | 2039.93056 |            | 395.305556 |            |
| 2216.34885 | 1329.84989 | 0  | 0  |            |            |            |            |
| 1034.55478 | 572.842633 | 3  | 0  | 749.462574 | 159.811648 | 2189.67652 | 1557.40991 |
| 1453.30875 | 865.074021 | 0  | 0  |            |            |            |            |
| 1103.13219 | 689.479126 | 6  | 2  | 1758.49973 | 1117.80827 | 838.291952 | 507.581804 |
| 1020.38371 | 527.162888 | 1  | 0  | 2039.93056 |            | 395.305556 |            |
| 2216.34885 | 1329.84989 | 0  | 0  |            |            |            |            |
|            |            | 0  | 0  |            |            |            |            |
| 1868.52933 | 1347.47088 | 2  | 2  | 2646.24726 | 47.795547  | 2646.24726 | 47.795547  |
|            |            | 0  | 0  |            |            |            |            |
| 450.415101 | 111.596024 | 0  | 0  |            |            |            |            |
| 1393.28771 | 1372.90589 | 1  | 0  | 3758.70823 |            | 3760.74314 |            |

AnnotatedResults

|            |            |   |   |            |            |            |            |
|------------|------------|---|---|------------|------------|------------|------------|
|            |            | 0 | 0 |            |            |            |            |
| 2187.11484 | 1014.87692 | 5 | 0 | 2187.11484 | 1014.87692 | 2328.89739 | 830.699682 |
|            |            | 0 | 0 |            |            |            |            |
|            |            | 0 | 0 |            |            |            |            |
| 2357.34791 | 1318.4846  | 1 | 0 | 3758.70823 |            | 3760.74314 |            |
|            |            | 0 | 0 |            |            |            |            |
| 2187.11484 | 1014.87692 | 5 | 0 | 2187.11484 | 1014.87692 | 2328.89739 | 830.699682 |
|            |            | 0 | 0 |            |            |            |            |
|            |            | 0 | 0 |            |            |            |            |
| 2357.34791 | 1318.4846  | 1 | 0 | 3758.70823 |            | 3760.74314 |            |
| 732.085714 |            | 0 | 0 |            |            |            |            |
| 3037.7292  | 1547.27427 | 3 | 0 | 3037.7292  | 1547.27427 | 3022.53716 | 1521.22334 |
| 896.110389 | 248.792535 | 0 | 0 |            |            |            |            |
| 1407.68159 | 1207.53607 | 1 | 0 | 674.147727 |            | 2900.90909 |            |
| 2910.22751 | 714.234912 | 1 | 0 | 3611.60901 |            | 3611.60901 |            |
| 1592.05737 | 469.956552 | 0 | 0 |            |            |            |            |
| 2983.946   | 1407.6525  | 3 | 0 | 2983.946   | 1407.6525  | 2971.3292  | 1386.14337 |
| 896.110389 | 248.792535 | 0 | 0 |            |            |            |            |
| 1580.27122 | 1066.30794 | 3 | 0 | 1416.32935 | 999.397851 | 1431.12221 | 1274.70625 |
| 2011.41596 | 994.556409 | 1 | 0 | 3611.60901 |            | 3611.60901 |            |
| 1592.05737 | 469.956552 | 0 | 0 |            |            |            |            |
| 2983.946   | 1407.6525  | 3 | 0 | 2983.946   | 1407.6525  | 2971.3292  | 1386.14337 |
| 896.110389 | 248.792535 | 0 | 0 |            |            |            |            |
| 1580.27122 | 1066.30794 | 3 | 1 | 1416.32935 | 999.397851 | 1431.12221 | 1274.70625 |
| 2011.41596 | 994.556409 | 1 | 0 | 3611.60901 |            | 3611.60901 |            |
|            |            | 0 | 0 |            |            |            |            |
| 751.922374 | 855.111984 | 9 | 2 | 1498.9779  | 1343.48929 | 1040.60067 | 433.123598 |
|            |            | 0 | 0 |            |            |            |            |
| 726.265306 |            | 0 | 0 |            |            |            |            |
|            |            | 0 | 0 |            |            |            |            |
| 1801.54558 | 1741.92521 | 6 | 0 | 2353.11601 | 1938.48256 | 1084.88521 | 586.018577 |
|            |            | 0 | 0 |            |            |            |            |
| 726.265306 |            | 0 | 0 |            |            |            |            |
|            |            | 0 | 0 |            |            |            |            |
| 1801.54558 | 1741.92521 | 6 | 0 | 2353.11601 | 1938.48256 | 1084.88521 | 586.018577 |
|            |            | 0 | 0 |            |            |            |            |
| 726.265306 |            | 0 | 0 |            |            |            |            |
| 824.15723  | 115.269358 | 0 | 0 |            |            |            |            |
| 1170.33963 | 1023.26858 | 6 | 0 | 1472.21067 | 1413.95747 | 1233.48348 | 572.875031 |
| 691.354839 |            | 0 | 0 |            |            |            |            |
| 685.641026 |            | 0 | 0 |            |            |            |            |
| 1193.17686 | 642.11871  | 0 | 0 |            |            |            |            |
| 1352.72486 | 1159.63406 | 8 | 0 | 1532.61068 | 1297.12206 | 1150.05241 | 512.072135 |
| 691.354839 |            | 0 | 0 |            |            |            |            |
| 685.641026 |            | 0 | 0 |            |            |            |            |
| 1193.17686 | 642.11871  | 0 | 0 |            |            |            |            |
| 1352.72486 | 1159.63406 | 8 | 0 | 1532.61068 | 1297.12206 | 1150.05241 | 512.072135 |
| 691.354839 |            | 0 | 0 |            |            |            |            |
| 685.641026 |            | 0 | 0 |            |            |            |            |
|            |            | 0 | 0 |            |            |            |            |
| 423.769231 |            | 0 | 0 |            |            |            |            |
|            |            | 0 | 0 |            |            |            |            |
|            |            | 0 | 0 |            |            |            |            |
| 858.829787 |            | 0 | 0 |            |            |            |            |
| 1321.2973  |            | 0 | 0 |            |            |            |            |
|            |            | 0 | 0 |            |            |            |            |
|            |            | 0 | 0 |            |            |            |            |
| 858.829787 |            | 0 | 0 |            |            |            |            |

AnnotatedResults

|            |            |    |    |            |            |            |            |
|------------|------------|----|----|------------|------------|------------|------------|
| 1321.2973  |            | 0  | 0  |            |            |            |            |
|            |            | 0  | 0  |            |            |            |            |
|            |            | 0  | 0  |            |            |            |            |
| 755.23913  | 167.215382 | 0  | 0  |            |            |            |            |
| 1027.55748 | 593.583571 | 0  | 0  |            |            |            |            |
| 1720.9713  | 721.099539 | 0  | 0  |            |            |            |            |
|            |            | 0  | 0  |            |            |            |            |
| 1367.1464  | 1066.42956 | 0  | 0  |            |            |            |            |
| 1027.55748 | 593.583571 | 0  | 0  |            |            |            |            |
| 1255.07724 | 637.375799 | 0  | 0  |            |            |            |            |
|            |            | 0  | 0  |            |            |            |            |
| 1367.1464  | 1066.42956 | 0  | 0  |            |            |            |            |
| 1027.55748 | 593.583571 | 0  | 0  |            |            |            |            |
| 1255.07724 | 637.375799 | 0  | 0  |            |            |            |            |
|            |            | 0  | 0  |            |            |            |            |
| 743.652859 | 815.938407 | 2  | 0  | 1329.95833 | 703.630173 | 1100.28244 | 175.534629 |
| 652.041624 | 514.247821 | 2  | 0  | 853.380952 | 278.667415 | 1292.55357 | 905.728025 |
| 671.158903 | 464.623742 | 17 | 12 | 584.826111 | 231.55334  | 1504.23213 | 879.113922 |
| 436.142144 | 125.662607 | 0  | 0  |            |            |            |            |
| 526.698954 | 316.575523 | 1  | 0  | 321.95     |            | 481.75     |            |
| 1596.74125 | 1276.16567 | 1  | 0  | 1408.52564 |            | 716.448718 |            |
| 1248.04324 | 569.541931 | 2  | 0  | 855.945228 | 284.066831 | 1291.09719 | 895.360108 |
| 1009.58041 | 557.987891 | 8  | 5  | 771.387176 | 219.112216 | 1839.24644 | 912.268974 |
|            |            | 0  | 0  |            |            |            |            |
| 1017.41405 | 387.235841 | 0  | 0  |            |            |            |            |
| 1596.74125 | 1276.16567 | 1  | 0  | 1408.52564 |            | 716.448718 |            |
| 1248.04324 | 569.541931 | 2  | 0  | 855.945228 | 284.066831 | 1291.09719 | 895.360108 |
| 1009.58041 | 557.987891 | 8  | 5  | 771.387176 | 219.112216 | 1839.24644 | 912.268974 |
|            |            | 0  | 0  |            |            |            |            |
| 1017.41405 | 387.235841 | 0  | 0  |            |            |            |            |
| 1157.56427 | 881.689259 | 0  | 0  |            |            |            |            |
| 1343.96841 | 638.187043 | 2  | 0  | 1185.26471 | 816.375576 | 1652.33367 | 487.072259 |
| 1230.18674 | 786.775969 | 4  | 0  | 799.415517 | 81.275027  | 1628.85682 | 1255.11764 |
| 684.528106 | 40.887848  | 0  | 0  |            |            |            |            |
| 1069.00003 | 250.154854 | 0  | 0  |            |            |            |            |
| 1009.27168 | 721.419994 | 0  | 0  |            |            |            |            |
| 1421.11028 | 705.188577 | 2  | 0  | 1193.19514 | 805.160248 | 1678.37818 | 523.904758 |
| 1163.99017 | 721.489588 | 4  | 2  | 833.056117 | 85.547958  | 1736.39274 | 1425.00803 |
| 1017.31526 | 662.008454 | 1  | 0  | 2009.19643 |            | 942.5      |            |
| 962.165478 | 139.9128   | 0  | 0  |            |            |            |            |
| 1009.27168 | 721.419994 | 0  | 0  |            |            |            |            |
| 1421.11028 | 705.188577 | 2  | 0  | 1193.19514 | 805.160248 | 1678.37818 | 523.904758 |
| 1163.99017 | 721.489588 | 4  | 2  | 833.056117 | 85.547958  | 1736.39274 | 1425.00803 |
| 1017.31526 | 662.008454 | 1  | 0  | 2009.19643 |            | 942.5      |            |
| 962.165478 | 139.9128   | 0  | 0  |            |            |            |            |
| 716.777339 | 518.374234 | 0  | 0  |            |            |            |            |
| 704.532611 | 516.984057 | 4  | 1  | 509.947466 | 160.946379 | 874.878482 | 481.418632 |
| 733.384638 | 855.156704 | 7  | 6  | 696.122399 | 290.676443 | 1073.21309 | 313.053957 |
| 739.663735 | 768.456029 | 12 | 5  | 509.6243   | 241.22653  | 1641.10923 | 740.88245  |
| 1188.82874 | 527.032333 | 0  | 0  |            |            |            |            |
| 1292.87819 | 712.541919 | 1  | 0  | 669.882353 |            | 932.470588 |            |
| 1595.32729 | 1319.4545  | 2  | 0  | 944.382572 | 427.59132  | 1169.69688 | 53.628059  |
| 1153.062   | 906.027642 | 2  | 0  | 825.843919 | 296.16524  | 920.206281 | 744.948315 |
| 1188.82874 | 527.032333 | 0  | 0  |            |            |            |            |
| 1292.87819 | 712.541919 | 1  | 0  | 669.882353 |            | 932.470588 |            |
| 1595.32729 | 1319.4545  | 2  | 2  | 944.382572 | 427.59132  | 1169.69688 | 53.628059  |
| 1153.062   | 906.027642 | 2  | 0  | 825.843919 | 296.16524  | 920.206281 | 744.948315 |
| 1576.79092 | 821.080759 | 0  | 0  |            |            |            |            |

AnnotatedResults

|            |            |    |    |            |            |            |            |
|------------|------------|----|----|------------|------------|------------|------------|
| 1266.00741 | 771.595425 | 1  | 0  | 1060.11487 |            | 1621       |            |
| 2001.2375  | 1435.33898 | 6  | 1  | 1642.79861 | 1161.16617 | 1232.64654 | 838.877076 |
| 1216.59174 | 1086.18168 | 5  | 0  | 821.843463 | 321.329445 | 2163.5086  | 1337.53415 |
| 1584.13769 | 804.236187 | 0  | 0  |            |            |            |            |
| 1281.20413 | 765.521612 | 1  | 0  | 1060.11487 |            | 1621       |            |
| 1850.33259 | 1399.69058 | 6  | 1  | 1638.74062 | 1132.47489 | 1249.97705 | 864.835389 |
| 1218.20994 | 1075.32585 | 5  | 0  | 833.455281 | 353.26453  | 2159.60446 | 1352.21478 |
| 1584.13769 | 804.236187 | 0  | 0  |            |            |            |            |
| 1281.20413 | 765.521612 | 1  | 0  | 1060.11487 |            | 1621       |            |
| 1850.33259 | 1399.69058 | 6  | 4  | 1638.74062 | 1132.47489 | 1249.97705 | 864.835389 |
| 1218.20994 | 1075.32585 | 5  | 2  | 833.455281 | 353.26453  | 2159.60446 | 1352.21478 |
| 602.164579 | 191.935296 | 0  | 0  |            |            |            |            |
| 1202.15524 | 1354.24068 | 31 | 25 | 2609.51671 | 1614.5518  | 1672.2898  | 1034.55943 |
| 600.892    | 339.786    | 5  | 3  | 1317.06    | 928.918    | 1201.74    | 487.516    |
| 781.426446 | 834.187243 | 19 | 14 | 1559.40983 | 1645.80308 | 1501.42656 | 799.677214 |
| 522.436655 | 290.553525 | 1  | 0  | 309.947761 |            | 365.022388 |            |
| 772.321072 | 201.152663 | 0  | 0  |            |            |            |            |
| 2550.0638  | 1520.28399 | 27 | 10 | 3278.37273 | 1311.92389 | 1769.30504 | 1087.0081  |
| 1039.54707 | 659.114371 | 5  | 0  | 2025.40207 | 1251.32262 | 1116.95593 | 313.399875 |
| 1279.1205  | 1124.99526 | 10 | 0  | 2504.83384 | 1830.73971 | 1329.36435 | 767.645154 |
| 1525.5532  | 1345.69825 | 0  | 0  |            |            |            |            |
| 772.321072 | 201.152663 | 0  | 0  |            |            |            |            |
| 2550.0638  | 1520.28399 | 27 | 18 | 3278.37273 | 1311.92389 | 1769.30504 | 1087.0081  |
| 1039.54707 | 659.114371 | 5  | 0  | 2025.40207 | 1251.32262 | 1116.95593 | 313.399875 |
| 1279.1205  | 1124.99526 | 10 | 0  | 2504.83384 | 1830.73971 | 1329.36435 | 767.645154 |
| 1525.5532  | 1345.69825 | 0  | 0  |            |            |            |            |
| 687.666935 | 68.2556    | 0  | 0  |            |            |            |            |
| 2435.7793  | 1555.04549 | 32 | 14 | 3267.21871 | 1328.36958 | 2274.04847 | 1348.11366 |
| 1014.08687 | 583.590312 | 10 | 0  | 1829.38804 | 862.346943 | 1005.21533 | 476.080139 |
| 1347.35231 | 1164.87608 | 13 | 6  | 2479.92389 | 1677.05096 | 2106.38391 | 1217.35918 |
| 1247.48207 | 872.781864 | 0  | 0  |            |            |            |            |
| 692.177676 | 63.561903  | 0  | 0  |            |            |            |            |
| 2386.83913 | 1576.75751 | 30 | 14 | 3343.96916 | 1382.24223 | 2397.23246 | 1342.93684 |
| 1008.49298 | 548.337822 | 11 | 0  | 1635.38537 | 831.61305  | 1007.74859 | 483.456897 |
| 1325.10185 | 1127.39568 | 14 | 0  | 2343.63009 | 1681.96875 | 2113.11148 | 1168.98082 |
| 944.014508 | 323.903602 | 1  | 0  | 861.118644 |            | 403.991525 |            |
| 692.177676 | 63.561903  | 0  | 0  |            |            |            |            |
| 2386.83913 | 1576.75751 | 30 | 26 | 3343.96916 | 1382.24223 | 2397.23246 | 1342.93684 |
| 1008.49298 | 548.337822 | 11 | 0  | 1635.38537 | 831.61305  | 1007.74859 | 483.456897 |
| 1325.10185 | 1127.39568 | 14 | 6  | 2343.63009 | 1681.96875 | 2113.11148 | 1168.98082 |
| 944.014508 | 323.903602 | 1  | 0  | 861.118644 |            | 403.991525 |            |
| 1113.50099 | 1022.47227 | 17 | 8  | 1064.35289 | 787.371729 | 1596.91299 | 718.08078  |
| 746.595    | 786.776    | 22 | 9  | 1255.15    | 1099.89    | 1545.5     | 938.969    |
| 813.360507 | 832.671257 | 23 | 18 | 1634.85072 | 1494.64768 | 1655.39199 | 970.939241 |
| 881.636737 | 972.72386  | 0  | 0  |            |            |            |            |
| 1493.52906 | 1059.78451 | 13 | 0  | 1255.59229 | 816.51305  | 1591.55991 | 812.669286 |
| 1428.51615 | 1032.40153 | 14 | 6  | 1673.26009 | 988.556512 | 1606.30272 | 1158.30849 |
| 1268.93639 | 1051.03774 | 12 | 0  | 2513.50102 | 1505.72847 | 1805.76578 | 1307.90131 |
| 1690.10132 | 1261.7312  | 0  | 0  |            |            |            |            |
| 1493.52906 | 1059.78451 | 13 | 3  | 1255.59229 | 816.51305  | 1591.55991 | 812.669286 |
| 1428.51615 | 1032.40153 | 14 | 6  | 1673.26009 | 988.556512 | 1606.30272 | 1158.30849 |
| 1268.93639 | 1051.03774 | 12 | 7  | 2513.50102 | 1505.72847 | 1805.76578 | 1307.90131 |
| 1690.10132 | 1261.7312  | 0  | 0  |            |            |            |            |
| 1409.42199 | 918.311133 | 15 | 0  | 1277.85537 | 711.101772 | 2004.74457 | 996.809783 |
| 1300.59052 | 891.066746 | 22 | 7  | 1522.2204  | 975.205616 | 2441.08488 | 1128.83022 |
| 1483.55483 | 1319.90696 | 16 | 0  | 2956.17968 | 1771.86474 | 1991.50601 | 1143.88396 |
| 1142.26297 | 494.612675 | 1  | 0  | 1033.85455 |            | 912.109091 |            |
| 1383.92756 | 905.863252 | 15 | 0  | 1270.065   | 713.966864 | 1979.06518 | 968.839294 |

AnnotatedResults

|            |            |    |    |            |            |            |            |
|------------|------------|----|----|------------|------------|------------|------------|
| 1247.75779 | 866.536844 | 23 | 7  | 1490.00456 | 978.414305 | 2504.66451 | 1163.30116 |
| 1403.85944 | 1213.11244 | 18 | 0  | 2755.70876 | 1701.64002 | 1958.83769 | 1190.6626  |
| 1236.74235 | 563.14191  | 1  | 0  | 1033.85455 |            | 912.109091 |            |
| 1383.92756 | 905.863252 | 15 | 3  | 1270.065   | 713.966864 | 1979.06518 | 968.839294 |
| 1247.75779 | 866.536844 | 23 | 12 | 1490.00456 | 978.414305 | 2504.66451 | 1163.30116 |
| 1403.85944 | 1213.11244 | 18 | 7  | 2755.70876 | 1701.64002 | 1958.83769 | 1190.6626  |
| 1236.74235 | 563.14191  | 1  | 0  | 1033.85455 |            | 912.109091 |            |
| 489.507992 | 303.157319 | 5  | 5  | 741.908714 | 490.057601 | 729.707883 | 404.705987 |
| 880.693362 | 810.928074 | 9  | 2  | 1075.35213 | 928.66543  | 1377.39764 | 464.923422 |
| 486.969456 | 96.551645  | 0  | 0  |            |            |            |            |
| 1168.28093 | 1183.49866 | 7  | 4  | 1136.49753 | 801.853946 | 1403.07961 | 1040.06148 |
| 667.629102 | 456.172351 | 1  | 0  | 308.333333 |            | 805.625    |            |
| 1171.95422 | 535.171844 | 5  | 5  | 1415.56638 | 621.210521 | 1038.25284 | 140.789578 |
| 1333.89634 | 963.009663 | 7  | 0  | 1334.50364 | 933.726448 | 1349.31577 | 561.443377 |
| 682.506744 | 118.67307  | 0  | 0  |            |            |            |            |
| 2117.0612  | 1248.00682 | 4  | 0  | 1827.95327 | 959.262873 | 1486.41828 | 734.041848 |
| 1391.31856 | 783.712754 | 1  | 0  | 1388.68639 |            | 351.035503 |            |
| 1171.95422 | 535.171844 | 5  | 5  | 1415.56638 | 621.210521 | 1038.25284 | 140.789578 |
| 1333.89634 | 963.009663 | 7  | 0  | 1334.50364 | 933.726448 | 1349.31577 | 561.443377 |
| 682.506744 | 118.67307  | 0  | 0  |            |            |            |            |
| 2117.0612  | 1248.00682 | 4  | 0  | 1827.95327 | 959.262873 | 1486.41828 | 734.041848 |
| 1391.31856 | 783.712754 | 1  | 0  | 1388.68639 |            | 351.035503 |            |
| 1539.25759 | 557.931233 | 4  | 3  | 1539.25759 | 557.931233 | 1581.17796 | 861.426852 |
| 2299.0179  | 1680.03786 | 3  | 0  | 1296.76344 | 1009.29435 | 2447.41208 | 729.672947 |
| 2047.70683 | 1725.69261 | 1  | 0  | 1081.88646 |            | 474.537118 |            |
| 1889.45042 | 1203.64651 | 7  | 0  | 1582.44455 | 1150.92248 | 1853.19949 | 1110.83021 |
| 1261.01999 | 729.493222 | 4  | 0  | 1357.53773 | 409.067503 | 463.131284 | 125.315962 |
| 1191.91828 | 580.339421 | 4  | 0  | 1518.32054 | 581.089485 | 1555.47098 | 829.693277 |
| 2039.14989 | 1381.42726 | 6  | 0  | 1447.96572 | 811.111487 | 1714.21541 | 965.90194  |
| 1624.83678 | 1492.66104 | 2  | 0  | 843.664906 | 336.896156 | 523.60846  | 69.397358  |
| 2013.49464 | 1345.32189 | 7  | 0  | 1582.34346 | 1126.64991 | 1860.41507 | 1106.8989  |
| 1277.01648 | 661.103346 | 4  | 0  | 1357.27949 | 405.267861 | 469.52564  | 128.609944 |
| 1191.91828 | 580.339421 | 4  | 3  | 1518.32054 | 581.089485 | 1555.47098 | 829.693277 |
| 2039.14989 | 1381.42726 | 6  | 0  | 1447.96572 | 811.111487 | 1714.21541 | 965.90194  |
| 1624.83678 | 1492.66104 | 2  | 0  | 843.664906 | 336.896156 | 523.60846  | 69.397358  |
| 2013.49464 | 1345.32189 | 7  | 0  | 1582.34346 | 1126.64991 | 1860.41507 | 1106.8989  |
| 1277.01648 | 661.103346 | 4  | 4  | 1357.27949 | 405.267861 | 469.52564  | 128.609944 |
| 695.285684 | 779.329824 | 2  | 0  | 1508.94038 | 1329.6673  | 1814.2872  | 839.331113 |
| 588.681831 | 641.152956 | 6  | 4  | 535.924101 | 331.718095 | 1502.00384 | 859.754824 |
|            |            | 0  | 0  |            |            |            |            |
| 558.165218 | 298.46395  | 0  | 0  |            |            |            |            |
| 1666.34538 | 1248.22985 | 1  | 0  | 2548.97717 |            | 1342.42466 |            |
| 1846.94751 | 770.121598 | 3  | 0  | 1382.12258 | 337.737507 | 583.652369 | 172.577337 |
|            |            | 0  | 0  |            |            |            |            |
| 838.654762 | 216.168147 | 0  | 0  |            |            |            |            |
| 1666.34538 | 1248.22985 | 1  | 0  | 2548.97717 |            | 1342.42466 |            |
| 1846.94751 | 770.121598 | 3  | 0  | 1382.12258 | 337.737507 | 583.652369 | 172.577337 |
|            |            | 0  | 0  |            |            |            |            |
| 838.654762 | 216.168147 | 0  | 0  |            |            |            |            |
| 2088.74118 | 1558.49555 | 2  | 0  | 1245.27119 | 762.653759 | 1572.1147  | 877.836308 |
| 2637.48353 | 1922.70191 | 12 | 6  | 2221.28003 | 1433.75929 | 913.26532  | 544.516429 |
|            |            | 0  | 0  |            |            |            |            |
| 817.3608   | 82.983845  | 0  | 0  |            |            |            |            |
| 1684.83073 | 1283.7134  | 3  | 0  | 1597.62161 | 814.415629 | 1573.54064 | 620.72892  |
| 2404.0752  | 1814.67799 | 14 | 8  | 1933.90176 | 1128.18666 | 959.421389 | 711.731206 |
|            |            | 0  | 0  |            |            |            |            |
| 1097.8114  | 501.641475 | 0  | 0  |            |            |            |            |
| 1684.83073 | 1283.7134  | 3  | 0  | 1597.62161 | 814.415629 | 1573.54064 | 620.72892  |

AnnotatedResults

|            |            |    |    |            |            |            |            |
|------------|------------|----|----|------------|------------|------------|------------|
| 2404.0752  | 1814.67799 | 14 | 8  | 1933.90176 | 1128.18666 | 959.421389 | 711.731206 |
|            |            | 0  | 0  |            |            |            |            |
| 1097.8114  | 501.641475 | 0  | 0  |            |            |            |            |
| 912.766065 | 830.682891 | 36 | 29 | 1621.84531 | 1203.16029 | 1291.16958 | 725.814674 |
| 526.720844 | 411.626381 | 21 | 17 | 827.208375 | 808.143691 | 1998.90956 | 1112.58751 |
| 598.911884 | 502.405167 | 10 | 4  | 632.03773  | 379.351909 | 1193.02678 | 552.244875 |
| 701.800328 | 633.615309 | 1  | 0  | 367.304348 |            | 637.043478 |            |
| 317.163282 | 1.99269    | 0  | 0  |            |            |            |            |
| 1339.36123 | 959.493501 | 30 | 11 | 1917.18212 | 1151.70859 | 1390.34517 | 705.978319 |
| 983.089498 | 670.296511 | 9  | 0  | 1322.72464 | 965.725111 | 2517.02233 | 1252.88048 |
| 1184.45006 | 728.584253 | 5  | 0  | 1018.9552  | 574.379616 | 1241.32079 | 539.476848 |
| 1894.13124 | 1575.49476 | 1  | 0  | 5432.06634 |            | 1974.30846 |            |
| 1617.92019 | 748.375492 | 1  | 0  | 1088.73881 |            | 411.69403  |            |
| 1339.36123 | 959.493501 | 30 | 11 | 1917.18212 | 1151.70859 | 1390.34517 | 705.978319 |
| 983.089498 | 670.296511 | 9  | 4  | 1322.72464 | 965.725111 | 2517.02233 | 1252.88048 |
| 1184.45006 | 728.584253 | 5  | 0  | 1018.9552  | 574.379616 | 1241.32079 | 539.476848 |
| 1894.13124 | 1575.49476 | 1  | 0  | 5432.06634 |            | 1974.30846 |            |
| 1617.92019 | 748.375492 | 1  | 0  | 1088.73881 |            | 411.69403  |            |
| 1315.22608 | 935.708934 | 56 | 24 | 1611.2217  | 1052.81051 | 1796.61435 | 1019.46976 |
| 984.34347  | 655.208716 | 16 | 1  | 1075.08238 | 838.362853 | 2806.41548 | 1340.03615 |
| 965.835303 | 450.479196 | 3  | 0  | 660.433691 | 70.261762  | 2741.5934  | 1216.59614 |
| 1387.10901 | 726.318387 | 0  | 0  |            |            |            |            |
| 2367.63052 | 1048.26664 | 0  | 0  |            |            |            |            |
| 1325.65821 | 940.063342 | 60 | 23 | 1569.54065 | 1046.97832 | 1854.5867  | 1080.05301 |
| 980.231803 | 602.67286  | 16 | 1  | 1114.25789 | 827.720982 | 2630.57666 | 1493.60882 |
| 926.748892 | 428.318395 | 4  | 0  | 655.692601 | 69.276233  | 2207.77616 | 1478.99696 |
| 1313.01773 | 727.483753 | 1  | 0  | 2067.5     |            | 927        |            |
| 1942.91385 | 1118.99716 | 0  | 0  |            |            |            |            |
| 1325.65821 | 940.063342 | 60 | 38 | 1569.54065 | 1046.97832 | 1854.5867  | 1080.05301 |
| 980.231803 | 602.67286  | 16 | 6  | 1114.25789 | 827.720982 | 2630.57666 | 1493.60882 |
| 926.748892 | 428.318395 | 4  | 2  | 655.692601 | 69.276233  | 2207.77616 | 1478.99696 |
| 1313.01773 | 727.483753 | 1  | 0  | 2067.5     |            | 927        |            |
| 1942.91385 | 1118.99716 | 0  | 0  |            |            |            |            |
|            |            | 0  | 0  |            |            |            |            |
| 581.114901 | 465.654303 | 3  | 2  | 369.927364 | 39.259814  | 362.135    | 32.106422  |
|            |            | 0  | 0  |            |            |            |            |
| 1015.91552 | 581.86229  | 1  | 0  | 604.476744 |            | 1645.04651 |            |
|            |            | 0  | 0  |            |            |            |            |
| 1015.91552 | 581.86229  | 1  | 0  | 604.476744 |            | 1645.04651 |            |
|            |            | 0  | 0  |            |            |            |            |
| 750.840945 |            | 0  | 0  |            |            |            |            |
| 763.379982 | 128.556268 | 0  | 0  |            |            |            |            |
| 696.161731 | 77.328086  | 0  | 0  |            |            |            |            |
| 763.379982 | 128.556268 | 0  | 0  |            |            |            |            |
| 696.161731 | 77.328086  | 0  | 0  |            |            |            |            |
| 379.780067 | 10.417485  | 0  | 0  |            |            |            |            |
| 980.396959 | 843.547335 | 0  | 0  |            |            |            |            |
| 1775.34741 | 1914.06227 | 1  | 0  | 724.893443 |            | 331.02459  |            |
| 749.218981 | 751.135198 | 1  | 1  | 3635.93044 |            | 493.947826 |            |
|            |            | 0  | 0  |            |            |            |            |
| 685.762712 |            | 0  | 0  |            |            |            |            |
| 3984.63027 |            | 0  | 0  |            |            |            |            |
| 1487.78268 | 1209.85502 | 1  | 0  | 3989.88679 |            | 553.735849 |            |
|            |            | 0  | 0  |            |            |            |            |
| 685.762712 |            | 0  | 0  |            |            |            |            |
| 3984.63027 |            | 0  | 0  |            |            |            |            |
| 1487.78268 | 1209.85502 | 1  | 0  | 3989.88679 |            | 553.735849 |            |
| 901.221719 |            | 0  | 0  |            |            |            |            |

AnnotatedResults

|            |            |    |    |            |            |            |            |
|------------|------------|----|----|------------|------------|------------|------------|
| 1243.9547  | 346.860545 | 0  | 0  |            |            |            |            |
| 601.36646  |            | 0  | 0  |            |            |            |            |
| 1107.6594  | 790.238529 | 2  | 0  | 2420.87653 | 1836.06765 | 608.047831 | 289.114647 |
| 1333.02485 | 812.309819 | 1  | 0  | 1907.41463 |            | 773.99187  |            |
| 1129.82313 | 394.162718 | 0  | 0  |            |            |            |            |
| 604.89552  | 4.990845   | 0  | 0  |            |            |            |            |
| 1330.4764  | 1055.52561 | 2  | 0  | 2459.58621 | 1781.3239  | 620.5      | 271.504621 |
| 1333.02485 | 812.309819 | 1  | 0  | 1907.41463 |            | 773.99187  |            |
| 1129.82313 | 394.162718 | 0  | 0  |            |            |            |            |
| 604.89552  | 4.990845   | 0  | 0  |            |            |            |            |
| 1330.4764  | 1055.52561 | 2  | 0  | 2459.58621 | 1781.3239  | 620.5      | 271.504621 |
| 873.168    | 629.759    | 26 | 25 | 1101.99    | 947.207    | 1125.05    | 462.576    |
| 575.041823 | 381.625564 | 9  | 5  | 846.039044 | 822.414877 | 985.688474 | 387.674865 |
| 1850.16393 |            | 0  | 0  |            |            |            |            |
| 680.936541 | 614.229214 | 13 | 5  | 870.842478 | 724.7007   | 1716.54196 | 786.694681 |
| 484.092837 | 140.425913 | 0  | 0  |            |            |            |            |
| 1148.83162 | 707.653605 | 16 | 12 | 1638.67681 | 1093.04283 | 1370.07232 | 445.423711 |
| 916.034755 | 544.136307 | 5  | 0  | 1105.02918 | 1076.83095 | 995.169878 | 395.125825 |
| 1823.95161 |            | 0  | 0  |            |            |            |            |
| 1174.17489 | 764.32114  | 5  | 0  | 1571.47672 | 723.533021 | 1597.57868 | 1192.61659 |
| 1158.49    | 397.073    | 0  | 0  |            |            |            |            |
| 1148.83162 | 707.653605 | 16 | 13 | 1638.67681 | 1093.04283 | 1370.07232 | 445.423711 |
| 916.034755 | 544.136307 | 5  | 0  | 1105.02918 | 1076.83095 | 995.169878 | 395.125825 |
| 1823.95161 |            | 0  | 0  |            |            |            |            |
| 1174.17489 | 764.32114  | 5  | 0  | 1571.47672 | 723.533021 | 1597.57868 | 1192.61659 |
| 1158.49264 | 397.072855 | 0  | 0  |            |            |            |            |
| 1076.27854 | 641.647411 | 23 | 15 | 1293.38954 | 904.58756  | 1804.67284 | 563.399593 |
| 1122.85065 | 725.463606 | 10 | 0  | 1663.33087 | 983.847941 | 1422.49016 | 467.216539 |
| 1910.59675 | 993.453362 | 2  | 0  | 1113.63196 | 488.010249 | 1404.70599 | 465.852149 |
| 1141.99932 | 730.616205 | 9  | 0  | 1228.24431 | 614.002571 | 1547.68581 | 1052.60126 |
| 1254.81302 | 636.347924 | 1  | 0  | 1315.82927 |            | 304.390244 |            |
| 1126.1699  | 711.748588 | 24 | 15 | 1343.59526 | 1000.7566  | 1724.72155 | 631.058387 |
| 1049.27314 | 706.49278  | 9  | 0  | 1693.46108 | 1044.58271 | 1388.01707 | 472.277763 |
| 1722.26212 | 990.437148 | 2  | 0  | 1113.63196 | 488.010249 | 1404.70599 | 465.852149 |
| 1333.96957 | 945.831815 | 10 | 0  | 1247.15919 | 582.127819 | 1504.81242 | 994.673351 |
| 1243.89627 | 581.621122 | 1  | 0  | 1315.82927 |            | 304.390244 |            |
| 1126.1699  | 711.748588 | 24 | 20 | 1343.59526 | 1000.7566  | 1724.72155 | 631.058387 |
| 1049.27314 | 706.49278  | 9  | 1  | 1693.46108 | 1044.58271 | 1388.01707 | 472.277763 |
| 1722.26212 | 990.437148 | 2  | 0  | 1113.63196 | 488.010249 | 1404.70599 | 465.852149 |
| 1333.96957 | 945.831815 | 10 | 0  | 1247.15919 | 582.127819 | 1504.81242 | 994.673351 |
| 1243.89627 | 581.621122 | 1  | 0  | 1315.82927 |            | 304.390244 |            |
| 747.2      | 870.268    | 0  | 0  |            |            |            |            |
| 532.221123 | 181.686595 | 0  | 0  |            |            |            |            |
| 317.013333 | 19.308729  | 0  | 0  |            |            |            |            |
| 524.333333 |            | 0  | 0  |            |            |            |            |
| 2024.48807 | 1342.51003 | 0  | 0  |            |            |            |            |
| 831.60047  | 162.346968 | 0  | 0  |            |            |            |            |
|            |            | 0  | 0  |            |            |            |            |
|            |            | 0  | 0  |            |            |            |            |
| 2024.48807 | 1342.51003 | 0  | 0  |            |            |            |            |
| 831.60047  | 162.346968 | 0  | 0  |            |            |            |            |
|            |            | 0  | 0  |            |            |            |            |
|            |            | 0  | 0  |            |            |            |            |
| 1479.9608  | 1504.43748 | 0  | 0  |            |            |            |            |
| 2232.3796  | 1224.93642 | 0  | 0  |            |            |            |            |
|            |            | 0  | 0  |            |            |            |            |
| 840.825397 |            | 0  | 0  |            |            |            |            |
| 2064.61928 | 1552.01315 | 1  | 0  | 825.893939 |            | 783.606061 |            |

AnnotatedResults

|            |            |   |   |            |            |            |            |
|------------|------------|---|---|------------|------------|------------|------------|
| 1695.95863 | 1277.27293 | 0 | 0 |            |            |            |            |
|            |            | 0 | 0 |            |            |            |            |
|            |            | 0 | 0 |            |            |            |            |
| 2064.61928 | 1552.01315 | 1 | 0 | 825.893939 |            | 783.606061 |            |
| 1695.95863 | 1277.27293 | 0 | 0 |            |            |            |            |
|            |            | 0 | 0 |            |            |            |            |
|            |            | 0 | 0 |            |            |            |            |
| 620.01923  | 136.118819 | 1 | 0 | 758.333333 |            | 1455.93287 |            |
| 1881.30247 | 1306.42656 | 0 | 0 |            |            |            |            |
| 416.702556 | 88.473702  | 0 | 0 |            |            |            |            |
| 490.938337 | 124.768768 | 7 | 2 | 506.993045 | 149.736509 | 1979.72044 | 755.797907 |
| 666.012069 | 379.8424   | 0 | 0 |            |            |            |            |
| 2238.36347 | 1697.27971 | 1 | 0 | 4974.03333 |            | 308.538889 |            |
| 2603.81528 | 540.911158 | 0 | 0 |            |            |            |            |
| 738.400651 |            | 0 | 0 |            |            |            |            |
| 634.652449 | 18.82515   | 2 | 0 | 624.2167   | 7.439314   | 2363.52671 | 1068.51042 |
| 1972.99099 | 1832.24622 | 1 | 0 | 3268.58472 |            | 784.82392  |            |
| 2238.36347 | 1697.27971 | 1 | 0 | 4974.03333 |            | 308.538889 |            |
| 2603.81528 | 540.911158 | 0 | 0 |            |            |            |            |
| 738.400651 |            | 0 | 0 |            |            |            |            |
| 634.652449 | 18.82515   | 2 | 0 | 624.2167   | 7.439314   | 2363.52671 | 1068.51042 |
| 1972.99099 | 1832.24622 | 1 | 0 | 3268.58472 |            | 784.82392  |            |
| 646.371212 |            | 0 | 0 |            |            |            |            |
| 1950.01412 | 1425.70783 | 0 | 0 |            |            |            |            |
| 3544.78814 |            | 0 | 0 |            |            |            |            |
|            |            | 0 | 0 |            |            |            |            |
| 2463.83614 | 2252.3363  | 1 | 0 | 4056.47841 |            | 1988.6113  |            |
| 786.441689 | 259.001844 | 2 | 0 | 777.769186 | 248.167347 | 1484.54669 | 16.236891  |
| 2169.24214 | 1393.45638 | 0 | 0 |            |            |            |            |
| 3544.78814 |            | 0 | 0 |            |            |            |            |
| 2924.50271 | 3246.3234  | 1 | 0 | 5220       |            | 1366.91257 |            |
| 2463.83614 | 2252.3363  | 1 | 0 | 4056.47841 |            | 1988.6113  |            |
| 786.441689 | 259.001844 | 2 | 0 | 777.769186 | 248.167347 | 1484.54669 | 16.236891  |
| 2169.24214 | 1393.45638 | 0 | 0 |            |            |            |            |
| 3544.78814 |            | 0 | 0 |            |            |            |            |
| 2924.50271 | 3246.3234  | 1 | 0 | 5220       |            | 1366.91257 |            |
| 2463.83614 | 2252.3363  | 1 | 0 | 4056.47841 |            | 1988.6113  |            |
| 950.325228 | 716.435639 | 1 | 0 | 1972.05882 |            | 379.6      |            |
| 979.50111  | 660.24121  | 2 | 0 | 1746.14351 | 1624.72844 | 792.892435 | 138.803975 |
| 774.280661 | 519.350007 | 0 | 0 |            |            |            |            |
| 779.41766  | 1103.59358 | 1 | 0 | 527.356322 |            | 1157.93103 |            |
|            |            | 0 | 0 |            |            |            |            |
| 1278.07994 | 699.745197 | 1 | 0 | 1974.76744 |            | 378.348837 |            |
| 1317.26389 | 548.850209 | 4 | 0 | 1513.88508 | 1031.50166 | 906.584212 | 368.452902 |
| 1272.21852 | 354.007842 | 0 | 0 |            |            |            |            |
| 1558.4436  | 1373.8719  | 0 | 0 |            |            |            |            |
| 2908.91791 |            | 0 | 0 |            |            |            |            |
| 1278.07994 | 699.745197 | 1 | 0 | 1974.76744 |            | 378.348837 |            |
| 1317.26389 | 548.850209 | 4 | 0 | 1513.88508 | 1031.50166 | 906.584212 | 368.452902 |
| 1272.21852 | 354.007842 | 0 | 0 |            |            |            |            |
| 1558.4436  | 1373.8719  | 0 | 0 |            |            |            |            |
| 2908.91791 |            | 0 | 0 |            |            |            |            |
| 1165.09117 | 453.646114 | 2 | 0 | 1533.71881 | 398.992109 | 508.808955 | 142.776862 |
| 1994.38654 | 1139.61364 | 0 | 0 |            |            |            |            |
| 1095.64531 | 473.749345 | 0 | 0 |            |            |            |            |
| 2305.26154 | 1732.01581 | 3 | 0 | 3315.37095 | 1463.63222 | 2029.61228 | 1273.71824 |
| 1313.89831 |            | 0 | 0 |            |            |            |            |
| 1190.06207 | 417.394391 | 2 | 0 | 1533.71881 | 398.992109 | 508.808955 | 142.776862 |



AnnotatedResults

|            |            |    |    |            |            |            |            |
|------------|------------|----|----|------------|------------|------------|------------|
| 1547.16159 | 765.32304  | 0  | 0  |            |            |            |            |
| 1008.91303 | 373.408121 | 0  | 0  |            |            |            |            |
| 2430.237   | 1526.84662 | 3  | 0  | 3302.92921 | 1472.32921 | 2025.53381 | 1193.70837 |
| 1313.89831 |            | 0  | 0  |            |            |            |            |
| 1190.06207 | 417.394391 | 2  | 0  | 1533.71881 | 398.992109 | 508.808955 | 142.776862 |
| 1547.16159 | 765.32304  | 0  | 0  |            |            |            |            |
| 1008.91303 | 373.408121 | 0  | 0  |            |            |            |            |
| 2430.237   | 1526.84662 | 3  | 0  | 3302.92921 | 1472.32921 | 2025.53381 | 1193.70837 |
| 1313.89831 |            | 0  | 0  |            |            |            |            |
| 572.116944 | 202.8344   | 3  | 2  | 568.107622 | 135.327124 | 1947.36536 | 624.577089 |
| 627.329243 | 469.385479 | 4  | 0  | 448.525846 | 67.472159  | 1336.01632 | 578.817097 |
| 968.544138 | 978.502579 | 2  | 0  | 2213.10118 | 1467.03734 | 1949.12905 | 1840.3503  |
| 721.66383  | 80.642747  | 2  | 0  | 701.746264 | 5.624921   | 2281.51151 | 369.577279 |
| 1632.41388 | 1275.81038 | 4  | 0  | 2194.95972 | 1618.40134 | 1136.20018 | 794.296632 |
| 1405.23157 | 1049.48698 | 2  | 0  | 2213.10118 | 1467.03734 | 1949.12905 | 1840.3503  |
| 721.66383  | 80.642747  | 2  | 0  | 701.746264 | 5.624921   | 2281.51151 | 369.577279 |
| 1632.41388 | 1275.81038 | 4  | 0  | 2194.95972 | 1618.40134 | 1136.20018 | 794.296632 |
| 1405.23157 | 1049.48698 | 2  | 0  | 2213.10118 | 1467.03734 | 1949.12905 | 1840.3503  |
|            |            | 0  | 0  |            |            |            |            |
| 1990.10954 | 1250.51821 | 3  | 0  | 2383.22587 | 1190.9874  | 695.497151 | 397.990216 |
| 1333.17132 |            | 1  | 0  | 1333.17132 |            | 848.693227 |            |
|            |            | 0  | 0  |            |            |            |            |
| 1262.91465 | 790.19641  | 7  | 0  | 1796.94588 | 973.286869 | 1076.75003 | 804.976859 |
| 1712.25352 | 536.103188 | 1  | 0  | 1333.17132 |            | 848.693227 |            |
|            |            | 0  | 0  |            |            |            |            |
| 1262.91465 | 790.19641  | 7  | 0  | 1796.94588 | 973.286869 | 1076.75003 | 804.976859 |
| 1712.25352 | 536.103188 | 1  | 0  | 1333.17132 |            | 848.693227 |            |
| 801.608843 | 528.112657 | 2  | 0  | 503.000886 | 179.470766 | 903.112812 | 449.976317 |
| 783.243099 | 768.3467   | 6  | 0  | 717.245254 | 680.365824 | 1111.59579 | 346.4682   |
| 669.307811 | 429.378282 | 0  | 0  |            |            |            |            |
| 2665.79822 | 1650.16959 | 0  | 0  |            |            |            |            |
| 1144.04364 | 503.266687 | 1  | 0  | 629.905882 |            | 1221.29412 |            |
| 1167.78557 | 874.57352  | 2  | 0  | 1720.23333 | 1556.43631 | 1592.09687 | 238.068    |
| 1145.25397 |            | 0  | 0  |            |            |            |            |
| 973.773683 | 334.71226  | 0  | 0  |            |            |            |            |
| 1144.04364 | 503.266687 | 1  | 0  | 629.905882 |            | 1221.29412 |            |
| 1167.78557 | 874.57352  | 2  | 0  | 1720.23333 | 1556.43631 | 1592.09687 | 238.068    |
| 1145.25397 |            | 0  | 0  |            |            |            |            |
| 973.773683 | 334.71226  | 0  | 0  |            |            |            |            |
| 1814.5988  | 960.081388 | 1  | 0  | 1788.35    |            | 338.4      |            |
| 2486.08857 | 1587.07405 | 1  | 0  | 3841.86047 |            | 937.348837 |            |
|            |            | 0  | 0  |            |            |            |            |
| 3273.89583 | 820.096552 | 0  | 0  |            |            |            |            |
| 1885.39327 | 892.549813 | 1  | 0  | 1788.35    |            | 338.4      |            |
| 2044.75839 | 1315.33727 | 3  | 0  | 2816.28939 | 1634.64518 | 523.902177 | 358.343909 |
|            |            | 0  | 0  |            |            |            |            |
| 3273.89583 | 820.096552 | 0  | 0  |            |            |            |            |
| 1885.39327 | 892.549813 | 1  | 0  | 1788.35    |            | 338.4      |            |
| 2044.75839 | 1315.33727 | 3  | 0  | 2816.28939 | 1634.64518 | 523.902177 | 358.343909 |
|            |            | 0  | 0  |            |            |            |            |
| 3273.89583 | 820.096552 | 0  | 0  |            |            |            |            |
| 993.619318 | 1199.15324 | 19 | 17 | 1454.75185 | 1575.05768 | 1405.38875 | 766.10854  |
| 371.130435 |            | 0  | 0  |            |            |            |            |
| 690.652521 | 729.862284 | 0  | 0  |            |            |            |            |
| 1141.43312 | 1418.54426 | 0  | 0  |            |            |            |            |
| 534.209494 | 270.113312 | 0  | 0  |            |            |            |            |
| 2149.94842 | 1460.12572 | 10 | 9  | 2501.86627 | 1496.5797  | 1440.99698 | 1006.53158 |
|            |            | 0  | 0  |            |            |            |            |

AnnotatedResults

|            |            |    |    |            |            |            |            |
|------------|------------|----|----|------------|------------|------------|------------|
| 2147.97917 |            | 0  | 0  |            |            |            |            |
| 3268       |            | 0  | 0  |            |            |            |            |
| 1727.66144 | 1362.21633 | 0  | 0  |            |            |            |            |
| 2149.94842 | 1460.12572 | 10 | 10 | 2501.86627 | 1496.5797  | 1440.99698 | 1006.53158 |
|            |            | 0  | 0  |            |            |            |            |
| 2147.97917 |            | 0  | 0  |            |            |            |            |
| 3268       |            | 0  | 0  |            |            |            |            |
| 1727.66144 | 1362.21633 | 0  | 0  |            |            |            |            |
| 1943.95764 | 1102.99608 | 23 | 11 | 1991.29271 | 1175.71478 | 1671.63155 | 1173.12504 |
| 1840.62493 | 1739.89506 | 1  | 0  | 3070.91653 |            | 3070.91653 |            |
| 1044.70871 | 646.299181 | 0  | 0  |            |            |            |            |
| 2037.74745 | 196.238341 | 1  | 0  | 2155.16418 |            | 651.955224 |            |
| 1237.36378 | 563.410364 | 0  | 0  |            |            |            |            |
| 1732.41995 | 1113.30678 | 25 | 11 | 2007.44467 | 1210.04293 | 1545.38115 | 1136.16896 |
| 1840.62493 | 1739.89506 | 1  | 0  | 3070.91653 |            | 3070.91653 |            |
| 956.840494 | 588.192958 | 0  | 0  |            |            |            |            |
| 1844.3501  | 766.980063 | 1  | 0  | 2254.44095 |            | 679.212598 |            |
| 1151.23997 | 599.873197 | 0  | 0  |            |            |            |            |
| 1732.41995 | 1113.30678 | 25 | 13 | 2007.44467 | 1210.04293 | 1545.38115 | 1136.16896 |
| 1840.62493 | 1739.89506 | 1  | 0  | 3070.91653 |            | 3070.91653 |            |
| 956.840494 | 588.192958 | 0  | 0  |            |            |            |            |
| 1844.3501  | 766.980063 | 1  | 0  | 2254.44095 |            | 679.212598 |            |
| 1151.23997 | 599.873197 | 0  | 0  |            |            |            |            |
| 551.366253 | 105.958734 | 0  | 0  |            |            |            |            |
| 834.179977 | 808.640506 | 2  | 0  | 377.070906 | 55.215322  | 851.126706 | 658.521791 |
| 1359.79777 | 761.090366 | 1  | 0  | 1532.24793 |            | 3015.27273 |            |
| 740.764808 | 657.744537 | 1  | 0  | 1897.71429 |            | 416.914286 |            |
| 810.420833 | 138.759882 | 0  | 0  |            |            |            |            |
| 1371.32221 | 1034.73592 | 0  | 0  |            |            |            |            |
| 1331.67942 | 769.880207 | 1  | 0  | 1526.31667 |            | 3021.7     |            |
| 1215.19481 | 866.380288 | 1  | 0  | 1827.81818 |            | 399.272727 |            |
| 810.420833 | 138.759882 | 0  | 0  |            |            |            |            |
| 1371.32221 | 1034.73592 | 0  | 0  |            |            |            |            |
| 1331.67942 | 769.880207 | 1  | 0  | 1526.31667 |            | 3021.7     |            |
| 1215.19481 | 866.380288 | 1  | 0  | 1827.81818 |            | 399.272727 |            |
| 1275.31963 | 611.45719  | 0  | 0  |            |            |            |            |
| 861.125507 | 194.817822 | 0  | 0  |            |            |            |            |
| 2299.89244 | 424.769732 | 0  | 0  |            |            |            |            |
| 1534.12325 | 990.234962 | 2  | 0  | 1903.2437  | 1069.4069  | 554.89972  | 173.362776 |
| 1225.28656 | 629.128894 | 0  | 0  |            |            |            |            |
| 879.713046 | 206.959549 | 0  | 0  |            |            |            |            |
| 2299.89244 | 424.769732 | 0  | 0  |            |            |            |            |
| 1407.42636 | 785.602809 | 4  | 0  | 1317.21571 | 917.089773 | 445.104912 | 161.531662 |
| 1225.28656 | 629.128894 | 0  | 0  |            |            |            |            |
| 879.713046 | 206.959549 | 0  | 0  |            |            |            |            |
| 2299.89244 | 424.769732 | 0  | 0  |            |            |            |            |
| 1407.42636 | 785.602809 | 4  | 0  | 1317.21571 | 917.089773 | 445.104912 | 161.531662 |
| 1233.22335 | 1179.09916 | 4  | 0  | 1707.78588 | 1135.78102 | 1569.21881 | 1319.79603 |
| 845.53833  | 1057.12871 | 2  | 0  | 2725.91693 | 2638.80503 | 577.109627 | 204.560135 |
| 732.43371  | 743.561602 | 4  | 3  | 400.313293 | 117.607387 | 792.697734 | 331.74731  |
| 1195.57351 | 1220.57999 | 32 | 24 | 2109.18498 | 1433.96218 | 1223.83386 | 510.501744 |
| 830.172506 | 754.149329 | 41 | 27 | 1036.10826 | 923.100147 | 1429.552   | 733.826025 |
| 1888.33339 | 1239.98342 | 4  | 0  | 1708.24748 | 1135.46229 | 1573.59783 | 1326.41028 |
| 1495.30618 | 1314.95267 | 2  | 0  | 2725.91693 | 2638.80503 | 577.109627 | 204.560135 |
| 1427.94423 | 898.1764   | 0  | 0  |            |            |            |            |
| 2188.02568 | 1286.06969 | 22 | 11 | 2809.24789 | 1133.16032 | 1165.0813  | 545.555054 |
| 1837.00248 | 1366.6091  | 22 | 0  | 2062.08343 | 1294.07479 | 1413.43173 | 702.482212 |
| 1888.33339 | 1239.98342 | 4  | 0  | 1708.24748 | 1135.46229 | 1573.59783 | 1326.41028 |

AnnotatedResults

|            |            |    |    |            |            |            |            |
|------------|------------|----|----|------------|------------|------------|------------|
| 1495.30618 | 1314.95267 | 2  | 0  | 2725.91693 | 2638.80503 | 577.109627 | 204.560135 |
| 1427.94423 | 898.1764   | 0  | 0  |            |            |            |            |
| 2188.02568 | 1286.06969 | 22 | 13 | 2809.24789 | 1133.16032 | 1165.0813  | 545.555054 |
| 1837.00248 | 1366.6091  | 22 | 0  | 2062.08343 | 1294.07479 | 1413.43173 | 702.482212 |
| 2268.98499 | 1292.19251 | 5  | 0  | 1546.57356 | 981.939533 | 1726.6178  | 1760.95871 |
| 2013.0005  | 1428.45498 | 3  | 0  | 2346.82644 | 1598.48377 | 403.255387 | 19.420562  |
| 1269.36375 | 687.681027 | 0  | 0  |            |            |            |            |
| 2131.53858 | 1274.18234 | 28 | 17 | 2702.7884  | 1096.60287 | 1640.82987 | 719.548821 |
| 1729.21963 | 1415.84458 | 19 | 0  | 1939.92826 | 1167.46251 | 1869.97971 | 1069.26169 |
| 2171.49997 | 1296.20778 | 5  | 0  | 1546.57356 | 981.939533 | 1726.6178  | 1760.95871 |
| 1988.11455 | 1394.34543 | 3  | 0  | 2346.82644 | 1598.48377 | 403.255387 | 19.420562  |
| 1372.21222 | 1010.69487 | 0  | 0  |            |            |            |            |
| 1953.26822 | 1242.27732 | 28 | 17 | 2700.78226 | 1074.79266 | 1663.11135 | 745.682707 |
| 1747.88506 | 1342.93814 | 21 | 0  | 1977.83581 | 1159.40576 | 1778.47169 | 1092.62186 |
| 2171.49997 | 1296.20778 | 5  | 0  | 1546.57356 | 981.939533 | 1726.6178  | 1760.95871 |
| 1988.11455 | 1394.34543 | 3  | 0  | 2346.82644 | 1598.48377 | 403.255387 | 19.420562  |
| 1372.21222 | 1010.69487 | 0  | 0  |            |            |            |            |
| 1953.26822 | 1242.27732 | 28 | 17 | 2700.78226 | 1074.79266 | 1663.11135 | 745.682707 |
| 1747.88506 | 1342.93814 | 21 | 0  | 1977.83581 | 1159.40576 | 1778.47169 | 1092.62186 |
| 627.839319 | 455.702705 | 0  | 0  |            |            |            |            |
| 604.691824 | 400.328933 | 5  | 3  | 1000.97594 | 858.306875 | 1252.68578 | 838.429553 |
| 480.56343  | 178.921661 | 0  | 0  |            |            |            |            |
| 1022.87203 | 1093.7575  | 0  | 0  |            |            |            |            |
| 1140.58728 | 557.639514 | 0  | 0  |            |            |            |            |
| 1181.75082 | 747.938472 | 3  | 0  | 1475.60809 | 865.832199 | 989.283959 | 1059.02809 |
| 821.901876 | 157.364336 | 0  | 0  |            |            |            |            |
| 3219.42529 |            | 0  | 0  |            |            |            |            |
| 1140.58728 | 557.639514 | 0  | 0  |            |            |            |            |
| 1181.75082 | 747.938472 | 3  | 0  | 1475.60809 | 865.832199 | 989.283959 | 1059.02809 |
| 821.901876 | 157.364336 | 0  | 0  |            |            |            |            |
| 3219.42529 |            | 0  | 0  |            |            |            |            |
| 948.129644 | 497.384817 | 0  | 0  |            |            |            |            |
| 1068.42305 | 447.661211 | 3  | 0  | 1313.97459 | 742.419313 | 1115.72769 | 1175.90074 |
| 847.620476 | 77.237946  | 0  | 0  |            |            |            |            |
| 1776.77817 | 1451.17421 | 0  | 0  |            |            |            |            |
| 946.422506 | 498.280419 | 0  | 0  |            |            |            |            |
| 1238.5003  | 772.841827 | 3  | 0  | 1280.41338 | 687.188058 | 1245.79791 | 1086.21516 |
| 975.904789 | 367.336384 | 0  | 0  |            |            |            |            |
| 1548.78756 | 1293.98302 | 0  | 0  |            |            |            |            |
| 946.422506 | 498.280419 | 0  | 0  |            |            |            |            |
| 1238.5003  | 772.841827 | 3  | 0  | 1280.41338 | 687.188058 | 1245.79791 | 1086.21516 |
| 975.904789 | 367.336384 | 0  | 0  |            |            |            |            |
| 1548.78756 | 1293.98302 | 0  | 0  |            |            |            |            |
| 954.417428 | 968.025469 | 0  | 0  |            |            |            |            |
| 890.220697 | 746.706296 | 1  | 0  | 944.344262 |            | 689.47541  |            |
| 1182.21289 | 655.112831 | 0  | 0  |            |            |            |            |
| 1529.33648 | 1202.26322 | 0  | 0  |            |            |            |            |
| 1540.40327 | 843.652307 | 1  | 0  | 944.344262 |            | 689.47541  |            |
| 1233.38294 | 504.932281 | 0  | 0  |            |            |            |            |
| 1529.33648 | 1202.26322 | 0  | 0  |            |            |            |            |
| 1540.40327 | 843.652307 | 1  | 0  | 944.344262 |            | 689.47541  |            |
| 1233.38294 | 504.932281 | 0  | 0  |            |            |            |            |
| 1328.29466 | 791.137912 | 2  | 0  | 874.697293 | 359.271689 | 603.96047  | 113.709721 |
| 1259.88997 | 718.400966 | 1  | 0  | 1031.03165 |            | 851.297468 |            |
| 1617.53415 | 699.89125  | 0  | 0  |            |            |            |            |
| 1341.53273 | 785.153017 | 3  | 0  | 981.337514 | 316.837538 | 673.571433 | 156.280362 |
| 1175.58681 | 687.635833 | 2  | 0  | 818.015823 | 301.249866 | 629.841916 | 313.185446 |
| 1617.53415 | 699.89125  | 0  | 0  |            |            |            |            |

AnnotatedResults

|            |            |   |   |            |            |            |            |
|------------|------------|---|---|------------|------------|------------|------------|
| 1341.53273 | 785.153017 | 3 | 0 | 981.337514 | 316.837538 | 673.571433 | 156.280362 |
| 1175.58681 | 687.635833 | 2 | 0 | 818.015823 | 301.249866 | 629.841916 | 313.185446 |
| 1617.53415 | 699.89125  | 0 | 0 |            |            |            |            |
| 1613.29748 | 2204.51202 | 0 | 0 |            |            |            |            |
| 630.640391 | 281.052126 | 0 | 0 |            |            |            |            |
| 2772.57833 | 1960.33085 | 0 | 0 |            |            |            |            |
| 807.600967 | 104.222908 | 0 | 0 |            |            |            |            |
| 2772.57833 | 1960.33085 | 0 | 0 |            |            |            |            |
| 807.600967 | 104.222908 | 0 | 0 |            |            |            |            |
|            |            | 0 | 0 |            |            |            |            |
| 1701.23965 | 924.964199 | 1 | 0 | 883.277778 |            | 777.472222 |            |
| 892.711431 | 207.299193 | 1 | 0 | 1178.71429 |            | 743.52381  |            |
|            |            | 0 | 0 |            |            |            |            |
| 1227.10555 | 805.900587 | 1 | 0 | 883.277778 |            | 777.472222 |            |
| 912.45778  | 237.058937 | 1 | 0 | 1178.71429 |            | 743.52381  |            |
|            |            | 0 | 0 |            |            |            |            |
| 1227.10555 | 805.900587 | 1 | 0 | 883.277778 |            | 777.472222 |            |
| 912.45778  | 237.058937 | 1 | 0 | 1178.71429 |            | 743.52381  |            |
| 474.50007  | 58.760672  | 0 | 0 |            |            |            |            |
|            |            | 0 | 0 |            |            |            |            |
| 730.234    | 663.679    | 0 | 0 |            |            |            |            |
| 744.119932 | 706.866994 | 4 | 2 | 512.335995 | 219.559763 | 828.433366 | 227.793591 |
|            |            | 0 | 0 |            |            |            |            |
|            |            | 0 | 0 |            |            |            |            |
| 2232       |            | 0 | 0 |            |            |            |            |
| 1508.46723 | 850.465666 | 1 | 0 | 831.417085 |            | 1052.95477 |            |
|            |            | 0 | 0 |            |            |            |            |
|            |            | 0 | 0 |            |            |            |            |
| 2232       |            | 0 | 0 |            |            |            |            |
| 1508.46723 | 850.465666 | 1 | 0 | 831.417085 |            | 1052.95477 |            |
| 645.838882 | 30.583663  | 2 | 0 | 663.488323 | 1.305468   | 3075.73926 | 589.505876 |
|            |            | 0 | 0 |            |            |            |            |
| 2170.96694 |            | 0 | 0 |            |            |            |            |
| 651.516129 |            | 0 | 0 |            |            |            |            |
| 674.328003 | 58.453048  | 3 | 0 | 700.811575 | 60.202436  | 2599.72569 | 947.91026  |
| 1644.72878 | 803.14099  | 0 | 0 |            |            |            |            |
| 1545.19157 | 786.53391  | 2 | 0 | 1322.25    | 723.173819 | 923.388889 | 408.786287 |
| 1029.99221 | 584.487834 | 0 | 0 |            |            |            |            |
| 674.328003 | 58.453048  | 3 | 0 | 700.811575 | 60.202436  | 2599.72569 | 947.91026  |
| 1644.72878 | 803.14099  | 0 | 0 |            |            |            |            |
| 1545.19157 | 786.53391  | 2 | 0 | 1322.25    | 723.173819 | 923.388889 | 408.786287 |
| 1029.99221 | 584.487834 | 0 | 0 |            |            |            |            |
| 733.177387 | 586.959209 | 7 | 5 | 1131.74654 | 838.987124 | 810.686789 | 310.300205 |
| 669.889398 | 478.025121 | 4 | 0 | 1371.3057  | 957.121744 | 1119.16691 | 541.90514  |
| 1070.52427 | 500.371221 | 1 | 1 | 307.749662 |            | 369.198917 |            |
| 683.290187 | 447.232997 | 3 | 0 | 711.141833 | 528.903025 | 1315.92505 | 863.831712 |
| 1054.91601 | 661.933993 | 5 | 3 | 1369.07582 | 849.928117 | 873.186956 | 265.620054 |
| 1035.8435  | 525.682371 | 3 | 0 | 1640.1783  | 959.162785 | 1157.10079 | 660.047054 |
| 1148.47237 | 425.681304 | 0 | 0 |            |            |            |            |
| 1137.28478 | 225.996983 | 1 | 0 | 1325.22636 |            | 830.532951 |            |
| 1054.91601 | 661.933993 | 5 | 3 | 1369.07582 | 849.928117 | 873.186956 | 265.620054 |
| 1035.8435  | 525.682371 | 3 | 0 | 1640.1783  | 959.162785 | 1157.10079 | 660.047054 |
| 1148.47237 | 425.681304 | 0 | 0 |            |            |            |            |
| 1137.28478 | 225.996983 | 1 | 0 | 1325.22636 |            | 830.532951 |            |
| 1311.48196 | 588.527562 | 2 | 0 | 1126.71581 | 367.783159 | 829.067308 | 45.159647  |

## AnnotatedResults

|            |            |    |    |            |            |            |            |
|------------|------------|----|----|------------|------------|------------|------------|
| 845.843152 | 175.555062 | 1  | 0  | 648.850679 |            | 2744.61539 |            |
| 1381.74872 | 604.824688 | 2  | 0  | 915.486613 | 432.068931 | 488.776022 | 218.881178 |
| 1087.60879 | 420.580377 | 1  | 0  | 1026.59583 |            | 1216.63333 |            |
| 1251.03058 | 592.103723 | 3  | 0  | 1288.76888 | 382.643191 | 762.267094 | 120.027091 |
| 942.633429 | 252.128178 | 1  | 0  | 648.850679 |            | 2744.61539 |            |
| 1364.2965  | 693.080219 | 2  | 0  | 915.486613 | 432.068931 | 488.776022 | 218.881178 |
| 1171.37022 | 785.142126 | 1  | 0  | 1026.59583 |            | 1216.63333 |            |
| 1251.03058 | 592.103723 | 3  | 0  | 1288.76888 | 382.643191 | 762.267094 | 120.027091 |
| 942.633429 | 252.128178 | 1  | 0  | 648.850679 |            | 2744.61539 |            |
| 1364.2965  | 693.080219 | 2  | 1  | 915.486613 | 432.068931 | 488.776022 | 218.881178 |
| 1171.37022 | 785.142126 | 1  | 0  | 1026.59583 |            | 1216.63333 |            |
| 1351.14197 | 1148.64367 | 0  | 0  |            |            |            |            |
| 929.257129 | 896.668695 | 3  | 0  | 1755.88657 | 710.869287 | 577.507314 | 221.472305 |
| 861.308232 | 957.449308 | 0  | 0  |            |            |            |            |
| 522.529297 | 196.186065 | 1  | 0  | 560.16826  |            | 560.16826  |            |
| 1276.85154 | 1308.8762  | 40 | 33 | 1959.68748 | 1307.71368 | 1873.20647 | 1014.67735 |
| 1897.97079 | 1261.34279 | 0  | 0  |            |            |            |            |
| 1320.65949 | 730.046542 | 3  | 0  | 1766.762   | 716.784475 | 579.435543 | 220.010356 |
| 1206.50361 | 894.601326 | 0  | 0  |            |            |            |            |
| 971.832575 | 444.172508 | 0  | 0  |            |            |            |            |
| 1871.01257 | 1439.36444 | 30 | 20 | 2237.68487 | 1298.09667 | 2016.48738 | 1043.86916 |
| 1897.97079 | 1261.34279 | 0  | 0  |            |            |            |            |
| 1320.65949 | 730.046542 | 3  | 0  | 1766.762   | 716.784475 | 579.435543 | 220.010356 |
| 1206.50361 | 894.601326 | 0  | 0  |            |            |            |            |
| 971.832575 | 444.172508 | 0  | 0  |            |            |            |            |
| 1871.01257 | 1439.36444 | 30 | 21 | 2237.68487 | 1298.09667 | 2016.48738 | 1043.86916 |
| 1316.09731 | 843.100855 | 1  | 0  | 773.589041 |            | 654.90411  |            |
| 1645.91126 | 1100.36468 | 2  | 0  | 1702.85938 | 674.248413 | 912.828125 | 277.340538 |
| 1401.67879 | 999.09781  | 2  | 0  | 868.335398 | 107.106027 | 448.907712 | 118.461393 |
| 927.515177 | 230.375531 | 0  | 0  |            |            |            |            |
| 1967.9122  | 1758.06208 | 8  | 0  | 1580.55739 | 1140.82336 | 1997.5527  | 1149.00995 |
| 1310.4172  | 778.216404 | 1  | 0  | 784.333333 |            | 664        |            |
| 1745.42061 | 1118.41416 | 2  | 0  | 1717.28875 | 369.768715 | 917.166706 | 123.254437 |
| 1399.25859 | 923.961095 | 2  | 0  | 868.335398 | 107.106027 | 448.907712 | 118.461393 |
| 832.625868 | 246.080083 | 0  | 0  |            |            |            |            |
| 2040.49327 | 1728.52179 | 9  | 0  | 1510.69439 | 1087.71693 | 1839.54805 | 1176.80014 |
| 1310.4172  | 778.216404 | 1  | 0  | 784.333333 |            | 664        |            |
| 1745.42061 | 1118.41416 | 2  | 0  | 1717.28875 | 369.768715 | 917.166706 | 123.254437 |
| 1399.25859 | 923.961095 | 2  | 1  | 868.335398 | 107.106027 | 448.907712 | 118.461393 |
| 832.625868 | 246.080083 | 0  | 0  |            |            |            |            |
| 2040.49327 | 1728.52179 | 9  | 1  | 1510.69439 | 1087.71693 | 1839.54805 | 1176.80014 |
| 679.030089 | 416.800861 | 1  | 0  | 1423.16883 |            | 381.038961 |            |
| 2246.06835 | 1989.99991 | 8  | 7  | 3256.45787 | 1991.51479 | 1045.46852 | 531.855058 |
|            |            | 0  | 0  |            |            |            |            |
|            |            | 0  | 0  |            |            |            |            |
|            |            | 0  | 0  |            |            |            |            |
| 567.6      | 325.483    | 0  | 0  |            |            |            |            |
| 1082.14333 | 305.725846 | 1  | 0  | 1406.76923 |            | 376.153846 |            |
| 3655.29827 | 1405.80438 | 6  | 0  | 4277.60535 | 1691.59003 | 1170.20719 | 547.568044 |
|            |            | 0  | 0  |            |            |            |            |
|            |            | 0  | 0  |            |            |            |            |
| 1026.48977 | 236.188138 | 0  | 0  |            |            |            |            |
| 1082.14333 | 305.725846 | 1  | 0  | 1406.76923 |            | 376.153846 |            |
| 3655.29827 | 1405.80438 | 6  | 0  | 4277.60535 | 1691.59003 | 1170.20719 | 547.568044 |
|            |            | 0  | 0  |            |            |            |            |
|            |            | 0  | 0  |            |            |            |            |
| 1026.48977 | 236.188138 | 0  | 0  |            |            |            |            |
| 1424.52603 | 655.883429 | 2  | 0  | 1099.18932 | 288.231827 | 462.667476 | 164.28562  |
| 2896.28297 | 877.139911 | 3  | 0  | 2896.28297 | 877.139911 | 767.415028 | 506.328339 |

AnnotatedResults

|            |            |    |    |            |            |            |            |
|------------|------------|----|----|------------|------------|------------|------------|
| 1474.43001 | 407.150329 | 1  | 0  | 1762.32877 |            | 433.273973 |            |
| 2946.75    |            | 0  | 0  |            |            |            |            |
| 883.784821 | 224.269723 | 2  | 0  | 944.339888 | 316.430285 | 370.019663 | 56.50101   |
| 1415.6894  | 568.355289 | 2  | 0  | 1099.18932 | 288.231827 | 462.667476 | 164.28562  |
| 2380.06814 | 1097.37223 | 6  | 0  | 2823.9588  | 907.553288 | 719.165787 | 476.759765 |
| 1381.70667 | 329.664293 | 1  | 0  | 1762.32877 |            | 433.273973 |            |
| 1827.76379 | 1170.71607 | 0  | 0  |            |            |            |            |
| 1116.23007 | 737.812978 | 2  | 0  | 944.339888 | 316.430285 | 370.019663 | 56.50101   |
| 1415.6894  | 568.355289 | 2  | 0  | 1099.18932 | 288.231827 | 462.667476 | 164.28562  |
| 2380.06814 | 1097.37223 | 6  | 0  | 2823.9588  | 907.553288 | 719.165787 | 476.759765 |
| 1381.70667 | 329.664293 | 1  | 0  | 1762.32877 |            | 433.273973 |            |
| 1827.76379 | 1170.71607 | 0  | 0  |            |            |            |            |
| 1116.23007 | 737.812978 | 2  | 0  | 944.339888 | 316.430285 | 370.019663 | 56.50101   |
|            |            | 0  | 0  |            |            |            |            |
| 873.733473 | 904.770896 | 41 | 35 | 1185.269   | 1024.404   | 1884.59738 | 928.531068 |
| 993.049    | 993.867    | 43 | 28 | 874.874    | 856.512    | 930.362    | 481.786    |
| 1219.27113 | 1345.74386 | 11 | 4  | 1413.13128 | 1703.19574 | 1350.51962 | 1713.40403 |
| 4339.23    |            | 1  | 0  | 4339.23    |            | 646.476    |            |
| 1803.47371 | 1042.62912 | 28 | 11 | 1749.79122 | 969.451251 | 1750.75087 | 1029.69235 |
| 1658.44112 | 1129.49984 | 18 | 9  | 1614.62679 | 990.913375 | 980.586918 | 424.947634 |
| 1969.90717 | 1447.98194 | 7  | 3  | 2499.28102 | 1825.50606 | 2140.19301 | 2150.15375 |
| 4339.23473 |            | 1  | 0  | 4339.23473 |            | 646.475884 |            |
| 1803.47371 | 1042.62912 | 28 | 20 | 1749.79122 | 969.451251 | 1750.75087 | 1029.69235 |
| 1658.44112 | 1129.49984 | 18 | 9  | 1614.62679 | 990.913375 | 980.586918 | 424.947634 |
| 1969.90717 | 1447.98194 | 7  | 3  | 2499.28102 | 1825.50606 | 2140.19301 | 2150.15375 |
|            |            | 0  | 0  |            |            |            |            |
| 1878.32472 | 1182.57558 | 38 | 25 | 2049.72927 | 1115.75569 | 2005.90684 | 1288.89412 |
| 1600.36913 | 1223.50436 | 15 | 4  | 1594.22905 | 1256.77705 | 1349.36375 | 861.6367   |
| 1770.88684 | 1335.11796 | 5  | 0  | 1173.70205 | 703.923472 | 849.767244 | 734.947375 |
| 1465.225   | 270.079435 | 0  | 0  |            |            |            |            |
| 1885.40512 | 1183.79863 | 42 | 19 | 1920.43186 | 1134.06629 | 1841.93877 | 1252.05586 |
| 1589.96242 | 1180.23351 | 17 | 9  | 1510.5406  | 1203.27394 | 1256.43642 | 839.733682 |
| 1906.54872 | 1298.40513 | 7  | 0  | 1089.30084 | 603.797393 | 697.538255 | 654.129406 |
| 1465.225   | 270.079435 | 0  | 0  |            |            |            |            |
| 1885.40512 | 1183.79863 | 42 | 33 | 1920.43186 | 1134.06629 | 1841.93877 | 1252.05586 |
| 1589.96242 | 1180.23351 | 17 | 9  | 1510.5406  | 1203.27394 | 1256.43642 | 839.733682 |
| 1906.54872 | 1298.40513 | 7  | 1  | 1089.30084 | 603.797393 | 697.538255 | 654.129406 |
| 749.866095 | 827.481841 | 0  | 0  |            |            |            |            |
| 811.495086 | 849.267231 | 18 | 5  | 1416.83544 | 1257.60515 | 1147.64192 | 926.604742 |
| 1436.85044 | 1535.24305 | 5  | 5  | 3498.64614 | 1030.377   | 919.26846  | 833.883338 |
| 1057.73101 | 1364.14137 | 0  | 0  |            |            |            |            |
| 515.91404  | 248.370344 | 4  | 2  | 563.918722 | 289.889607 | 453.524266 | 108.117328 |
| 1801.65504 | 1232.12869 | 0  | 0  |            |            |            |            |
| 1789.50204 | 1255.25018 | 8  | 0  | 2314.70811 | 1251.21168 | 1042.14982 | 1027.83005 |
| 1962.17281 | 1614.07262 | 5  | 0  | 3503.42651 | 1032.01575 | 919.318965 | 833.824868 |
| 1603.57867 | 1555.63207 | 1  | 0  | 1924.09877 |            | 309.62963  |            |
| 1962.36383 | 1869.44926 | 0  | 0  |            |            |            |            |
| 1801.65504 | 1232.12869 | 0  | 0  |            |            |            |            |
| 1789.50204 | 1255.25018 | 8  | 0  | 2314.70811 | 1251.21168 | 1042.14982 | 1027.83005 |
| 1962.17281 | 1614.07262 | 5  | 0  | 3503.42651 | 1032.01575 | 919.318965 | 833.824868 |
| 1603.57867 | 1555.63207 | 1  | 0  | 1924.09877 |            | 309.62963  |            |
| 1962.36383 | 1869.44926 | 0  | 0  |            |            |            |            |
| 1434.79558 | 812.476123 | 1  | 0  | 3040.33613 |            | 315.588235 |            |
| 1682.67026 | 992.292527 | 12 | 0  | 2026.3695  | 1110.99547 | 1417.91996 | 1128.46092 |
| 2792.84411 | 1631.02209 | 9  | 0  | 3931.28624 | 806.96741  | 907.533691 | 556.882556 |
| 1823.98445 | 1422.7064  | 0  | 0  |            |            |            |            |
| 1897.68495 | 1622.66994 | 1  | 1  | 649.526316 |            | 1032.33684 |            |
| 1333.58968 | 675.166007 | 3  | 0  | 1681.81752 | 1176.53691 | 334.686584 | 26.45029   |

### AnnotatedResults

|            |            |    |    |            |            |            |            |
|------------|------------|----|----|------------|------------|------------|------------|
| 1667.69857 | 1025.98631 | 14 | 0  | 2098.62436 | 1194.56472 | 1448.08227 | 1052.7409  |
| 2600.68016 | 1631.08245 | 9  | 0  | 3929.37356 | 814.181521 | 907.031852 | 558.479848 |
| 1327.85853 | 888.686863 | 0  | 0  |            |            |            |            |
| 1689.2484  | 1375.7076  | 2  | 1  | 836.985408 | 303.102831 | 656.581652 | 387.215864 |
| 1333.58968 | 675.166007 | 3  | 0  | 1681.81752 | 1176.53691 | 334.686584 | 26.45029   |
| 1667.69857 | 1025.98631 | 14 | 4  | 2098.62436 | 1194.56472 | 1448.08227 | 1052.7409  |
| 2600.68016 | 1631.08245 | 9  | 7  | 3929.37356 | 814.181521 | 907.031852 | 558.479848 |
| 1327.85853 | 888.686863 | 0  | 0  |            |            |            |            |
| 1689.2484  | 1375.7076  | 2  | 1  | 836.985408 | 303.102831 | 656.581652 | 387.215864 |
| 1204.52255 | 1394.65736 | 4  | 2  | 2235.41058 | 2010.929   | 1531.82329 | 788.916525 |
| 518.838542 |            | 0  | 0  |            |            |            |            |
|            |            | 0  | 0  |            |            |            |            |
| 3739.6129  |            | 0  | 0  |            |            |            |            |
| 2374.42699 | 1735.85023 | 4  | 0  | 3384.20216 | 1867.82486 | 1705.40426 | 687.144464 |
|            |            | 0  | 0  |            |            |            |            |
|            |            | 0  | 0  |            |            |            |            |
| 3335.93895 | 461.771046 | 0  | 0  |            |            |            |            |
| 2374.42699 | 1735.85023 | 4  | 0  | 3384.20216 | 1867.82486 | 1705.40426 | 687.144464 |
|            |            | 0  | 0  |            |            |            |            |
|            |            | 0  | 0  |            |            |            |            |
| 3335.93895 | 461.771046 | 0  | 0  |            |            |            |            |
| 1783.19036 | 1206.60859 | 2  | 0  | 3621.83834 | 662.165763 | 1601.8077  | 586.568552 |
| 2421.96729 | 2482.90869 | 0  | 0  |            |            |            |            |
|            |            | 0  | 0  |            |            |            |            |
| 2523.61095 | 1745.38729 | 0  | 0  |            |            |            |            |
| 1626.80047 | 1112.50309 | 2  | 0  | 3653.37108 | 617.781872 | 1636.37181 | 535.79622  |
| 2505.76043 | 1442.36974 | 1  | 0  | 1661.78571 |            | 604.371429 |            |
|            |            | 0  | 0  |            |            |            |            |
| 3435.97918 | 1457.86874 | 0  | 0  |            |            |            |            |
| 1626.80047 | 1112.50309 | 2  | 0  | 3653.37108 | 617.781872 | 1636.37181 | 535.79622  |
| 2505.76043 | 1442.36974 | 1  | 0  | 1661.78571 |            | 604.371429 |            |
|            |            | 0  | 0  |            |            |            |            |
| 3435.97918 | 1457.86874 | 0  | 0  |            |            |            |            |
| 1087.05964 | 1217.71624 | 47 | 35 | 1452.97371 | 1423.58253 | 1306.8285  | 626.766298 |
| 897.638931 | 1038.66601 | 28 | 20 | 1355.98657 | 1226.55306 | 1442.53382 | 894.436165 |
| 717.392381 | 703.423702 | 3  | 1  | 708.241473 | 320.617157 | 381.882228 | 126.757841 |
| 865.466544 | 979.2657   | 21 | 16 | 1351.83962 | 1255.21626 | 1324.40274 | 553.581638 |
| 736.635445 | 657.803745 | 0  | 0  |            |            |            |            |
| 711.918378 | 668.888816 | 31 | 24 | 713.225211 | 364.932794 | 1952.80836 | 822.688202 |
| 721.248472 | 643.469767 | 8  | 4  | 712.669732 | 334.360303 | 2183.33596 | 1070.78978 |
| 794.970617 | 730.825576 | 8  | 5  | 1119.64453 | 781.609805 | 1109.77875 | 584.504158 |
| 902.717    | 809.035    | 18 | 12 | 1618.32    | 1100.03    | 1439.52    | 739.693    |
| 2413.95792 | 1447.21863 | 26 | 14 | 2606.25796 | 1446.86657 | 1188.97014 | 611.953118 |
| 1639.53007 | 1396.83516 | 18 | 0  | 1820.25455 | 1182.18341 | 1459.91938 | 926.832909 |
| 1442.45963 | 1064.05475 | 1  | 0  | 625.21875  |            | 307.6875   |            |
| 1709.03644 | 1480.23968 | 13 | 0  | 2422.62522 | 1639.16762 | 1240.02424 | 593.48406  |
| 864.922368 | 310.294533 | 1  | 0  | 654.772727 |            | 544.80303  |            |
| 1220.13898 | 962.52592  | 18 | 0  | 924.7867   | 366.882694 | 2464.49023 | 870.957864 |
| 1121.21909 | 910.907323 | 6  | 0  | 1402.05923 | 1296.533   | 1977.11444 | 1201.40359 |
| 1560.92186 | 906.40753  | 4  | 0  | 1808.58962 | 522.885318 | 1018.65188 | 615.611035 |
| 1519.64076 | 904.929075 | 15 | 0  | 1837.71693 | 996.260587 | 1427.20583 | 755.360092 |
| 2413.95792 | 1447.21863 | 26 | 14 | 2606.25796 | 1446.86657 | 1188.97014 | 611.953118 |
| 1639.53007 | 1396.83516 | 18 | 7  | 1820.25455 | 1182.18341 | 1459.91938 | 926.832909 |
| 1442.45963 | 1064.05475 | 1  | 1  | 625.21875  |            | 307.6875   |            |
| 1709.03644 | 1480.23968 | 13 | 3  | 2422.62522 | 1639.16762 | 1240.02424 | 593.48406  |
| 864.922368 | 310.294533 | 1  | 0  | 654.772727 |            | 544.80303  |            |
| 1220.13898 | 962.52592  | 18 | 8  | 924.7867   | 366.882694 | 2464.49023 | 870.957864 |
| 1121.21909 | 910.907323 | 6  | 4  | 1402.05923 | 1296.533   | 1977.11444 | 1201.40359 |

## AnnotatedResults

|            |            |    |    |            |            |            |            |
|------------|------------|----|----|------------|------------|------------|------------|
| 1560.92186 | 906.40753  | 4  | 0  | 1808.58962 | 522.885318 | 1018.65188 | 615.611035 |
| 1519.64076 | 904.929075 | 15 | 0  | 1837.71693 | 996.260587 | 1427.20583 | 755.360092 |
| 2556.25474 | 1420.79916 | 15 | 0  | 2666.92421 | 1441.92307 | 1373.98489 | 914.079966 |
| 1755.41103 | 1317.47476 | 12 | 0  | 1436.74239 | 896.081554 | 1641.79324 | 1244.31771 |
| 1185.29736 | 887.773817 | 2  | 0  | 1475.44048 | 1155.86436 | 397.133132 | 105.462334 |
| 1877.32962 | 1327.58191 | 21 | 4  | 1939.62236 | 1172.08142 | 1745.91705 | 962.540682 |
| 1031.41692 | 491.613652 | 0  | 0  |            |            |            |            |
| 1229.72303 | 1033.2179  | 12 | 0  | 1053.6125  | 718.238518 | 2330.70467 | 1268.96075 |
| 1299.82943 | 842.117144 | 7  | 0  | 1319.80656 | 635.613128 | 1940.59414 | 1664.88932 |
| 1266.29471 | 595.886476 | 6  | 0  | 1964.78467 | 599.19446  | 2285.71977 | 432.74807  |
| 1380.86607 | 868.093275 | 12 | 0  | 1888.95697 | 1053.02882 | 1712.55194 | 677.242709 |
| 2321.14135 | 1454.74357 | 17 | 0  | 2745.32695 | 1468.63527 | 1439.85003 | 958.333509 |
| 1707.72781 | 1313.14683 | 15 | 0  | 1279.42541 | 893.400644 | 1496.63595 | 1147.50796 |
| 1145.51185 | 840.15205  | 3  | 0  | 1330.26309 | 873.944501 | 543.448616 | 260.551797 |
| 1815.09337 | 1321.11966 | 21 | 4  | 1893.37044 | 1188.02427 | 1701.24599 | 972.574199 |
| 1301.53142 | 953.311803 | 0  | 0  |            |            |            |            |
| 1271.37816 | 1065.73987 | 12 | 0  | 1042.27603 | 659.270561 | 2427.46532 | 1153.85094 |
| 1228.80848 | 817.221531 | 7  | 0  | 1317.62814 | 636.813145 | 1938.91882 | 1666.40177 |
| 1233.61596 | 562.492939 | 8  | 0  | 1851.09275 | 566.729961 | 1971.60496 | 849.690372 |
| 1367.35915 | 864.111255 | 13 | 0  | 1820.17902 | 1047.43925 | 1846.37658 | 691.133359 |
| 2321.14135 | 1454.74357 | 17 | 8  | 2745.32695 | 1468.63527 | 1439.85003 | 958.333509 |
| 1707.72781 | 1313.14683 | 15 | 1  | 1279.42541 | 893.400644 | 1496.63595 | 1147.50796 |
| 1145.51185 | 840.15205  | 3  | 0  | 1330.26309 | 873.944501 | 543.448616 | 260.551797 |
| 1815.09337 | 1321.11966 | 21 | 17 | 1893.37044 | 1188.02427 | 1701.24599 | 972.574199 |
| 1301.53142 | 953.311803 | 0  | 0  |            |            |            |            |
| 1271.37816 | 1065.73987 | 12 | 0  | 1042.27603 | 659.270561 | 2427.46532 | 1153.85094 |
| 1228.80848 | 817.221531 | 7  | 0  | 1317.62814 | 636.813145 | 1938.91882 | 1666.40177 |
| 1233.61596 | 562.492939 | 8  | 6  | 1851.09275 | 566.729961 | 1971.60496 | 849.690372 |
| 1367.35915 | 864.111255 | 13 | 0  | 1820.17902 | 1047.43925 | 1846.37658 | 691.133359 |



AnnotatedResults

| NumCellsM | TotalNumM | Marker2Pos | Marker2Pos | NumPosLab | NumPosLab | NumSphere | SphereMinS |
|-----------|-----------|------------|------------|-----------|-----------|-----------|------------|
| 1         | 0         | 400.922034 |            | 3         | 0         | 0         |            |
| 4         | 1         | 503.017675 | 160.412868 | 8         | 2         | 2         | 178.046318 |
| 0         | 0         |            |            | 1         | 0         | 0         |            |
| 1         | 0         | 1041.03279 |            | 3         | 0         | 0         |            |
| 1         | 0         | 2647.78652 |            | 6         | 2         | 1         | 437.516256 |
| 2         | 0         | 383.887963 | 114.455909 | 4         | 0         | 0         |            |
| 6         | 0         | 508.572636 | 198.613783 | 7         | 0         | 0         |            |
| 0         | 0         |            |            | 0         | 0         | 0         |            |
| 2         | 0         | 891.669833 | 211.231116 | 6         | 0         | 0         |            |
| 3         | 0         | 2269.3297  | 462.564709 | 4         | 0         | 0         |            |
| 2         | 0         | 383.887963 | 114.455909 | 4         | 0         | 0         |            |
| 6         | 0         | 508.572636 | 198.613783 | 7         | 0         | 0         |            |
| 0         | 0         |            |            | 0         | 0         | 0         |            |
| 2         | 0         | 891.669833 | 211.231116 | 6         | 0         | 0         |            |
| 3         | 0         | 2269.3297  | 462.564709 | 4         | 0         | 0         |            |
| 1         | 0         | 440.209302 |            | 3         | 0         | 0         |            |
| 5         | 0         | 1288.59013 | 1210.69398 | 6         | 0         | 0         |            |
| 0         | 0         |            |            | 0         | 0         | 0         |            |
| 1         | 0         | 3248.81818 |            | 3         | 0         | 0         |            |
| 2         | 0         | 2762.52122 | 661.85915  | 4         | 0         | 0         |            |
| 1         | 0         | 473.225    |            | 3         | 0         | 0         |            |
| 5         | 0         | 1292.22833 | 1208.03535 | 8         | 0         | 0         |            |
| 2         | 0         | 1149       | 442.648845 | 2         | 0         | 0         |            |
| 1         | 0         | 3248.81818 |            | 8         | 0         | 0         |            |
| 3         | 0         | 1960.41582 | 1414.40233 | 6         | 0         | 0         |            |
| 1         | 0         | 473.225    |            | 3         | 0         | 0         |            |
| 5         | 0         | 1292.22833 | 1208.03535 | 8         | 0         | 0         |            |
| 2         | 0         | 1149       | 442.648845 | 2         | 0         | 0         |            |
| 1         | 0         | 3248.81818 |            | 8         | 0         | 0         |            |
| 3         | 0         | 1960.41582 | 1414.40233 | 6         | 0         | 0         |            |
| 2         | 1         | 660.847403 | 249.695934 | 21        | 3         | 4         | 262.726883 |
| 3         | 0         | 785.888073 | 406.738765 | 8         | 0         | 0         |            |
| 10        | 6         | 1285.64367 | 694.10194  | 55        | 14        | 8         | 116.164366 |
| 0         | 0         |            |            | 3         | 0         | 0         |            |
| 0         | 0         |            |            | 1         | 0         | 0         |            |
| 3         | 0         | 587.327338 | 362.860662 | 13        | 0         | 0         |            |
| 5         | 0         | 751.144336 | 528.310621 | 8         | 0         | 0         |            |
| 10        | 0         | 1384.24508 | 765.075877 | 32        | 0         | 0         |            |
| 2         | 0         | 443.659241 | 193.993462 | 4         | 0         | 0         |            |
| 0         | 0         |            |            | 1         | 0         | 0         |            |
| 3         | 0         | 587.327338 | 362.860662 | 13        | 0         | 0         |            |
| 5         | 0         | 751.144336 | 528.310621 | 8         | 0         | 0         |            |
| 10        | 0         | 1384.24508 | 765.075877 | 32        | 0         | 0         |            |
| 2         | 0         | 443.659241 | 193.993462 | 4         | 0         | 0         |            |
| 0         | 0         |            |            | 1         | 0         | 0         |            |
| 0         | 0         |            |            | 7         | 0         | 0         |            |
| 3         | 0         | 1143.99361 | 831.018516 | 7         | 0         | 0         |            |
| 5         | 0         | 741.531047 | 306.542901 | 11        | 0         | 0         |            |
| 1         | 0         | 572.875648 |            | 3         | 0         | 0         |            |
| 1         | 0         | 465.379747 |            | 2         | 0         | 0         |            |
| 0         | 0         |            |            | 9         | 0         | 0         |            |
| 3         | 0         | 1143.99361 | 831.018516 | 8         | 0         | 0         |            |
| 4         | 0         | 653.303724 | 270.920032 | 14        | 0         | 0         |            |
| 2         | 0         | 542.37532  | 152.620228 | 6         | 0         | 0         |            |
| 2         | 0         | 397.831383 | 95.527812  | 3         | 0         | 0         |            |
| 0         | 0         |            |            | 9         | 0         | 0         |            |
| 3         | 0         | 1143.99361 | 831.018516 | 8         | 0         | 0         |            |

AnnotatedResults

|    |    |            |            |     |    |               |
|----|----|------------|------------|-----|----|---------------|
| 4  | 0  | 653.303724 | 270.920032 | 14  | 0  | 0             |
| 2  | 0  | 542.37532  | 152.620228 | 6   | 0  | 0             |
| 2  | 0  | 397.831383 | 95.527812  | 3   | 0  | 0             |
| 0  | 0  |            |            | 30  | 11 | 5 131.363442  |
| 3  | 0  | 781.018695 | 651.188033 | 20  | 1  | 2 10302.8022  |
| 26 | 17 | 1361.13679 | 608.347463 | 88  | 23 | 7 137.334507  |
| 0  | 0  |            |            | 0   | 0  | 0             |
| 0  | 0  |            |            | 6   | 1  | 1 393.547501  |
| 3  | 0  | 795.781684 | 635.797936 | 8   | 0  | 0             |
| 29 | 0  | 1314.29186 | 613.585884 | 51  | 0  | 1 642.70378   |
| 0  | 0  |            |            | 0   | 0  | 0             |
| 0  | 0  |            |            | 6   | 1  | 1 393.547501  |
| 3  | 0  | 795.781684 | 635.797936 | 8   | 0  | 0             |
| 29 | 13 | 1314.29186 | 613.585884 | 51  | 13 | 3 302.895869  |
| 0  | 0  |            |            | 0   | 0  | 0             |
| 0  | 0  |            |            | 7   | 1  | 1 265.983828  |
| 2  | 0  | 1212.09346 | 826.03289  | 12  | 0  | 0             |
| 29 | 0  | 1673.51203 | 952.430477 | 48  | 0  | 0             |
| 1  | 0  | 380        |            | 4   | 0  | 0             |
| 1  | 0  | 416        |            | 12  | 1  | 1 269.783597  |
| 3  | 0  | 980.531441 | 708.539392 | 14  | 0  | 0             |
| 31 | 0  | 1744.90511 | 1009.8736  | 57  | 0  | 0             |
| 1  | 0  | 381.910615 |            | 6   | 0  | 0             |
| 1  | 0  | 416        |            | 12  | 1  | 1 269.783597  |
| 3  | 0  | 980.531441 | 708.539392 | 14  | 0  | 0             |
| 31 | 14 | 1744.90511 | 1009.8736  | 57  | 14 | 3 301.810221  |
| 1  | 0  | 381.910615 |            | 6   | 0  | 0             |
| 1  | 0  | 562.427481 |            | 30  | 5  | 2 939.628584  |
| 0  | 0  |            |            | 4   | 1  | 1 10331.029   |
| 14 | 12 | 1474.01023 | 1032.47075 | 28  | 12 | 3 536.310249  |
| 2  | 0  | 1796.08628 | 1897.99662 | 21  | 7  | 4 10648.5811  |
| 22 | 13 | 1186.90085 | 481.199901 | 73  | 32 | 16 120.506959 |
| 2  | 0  | 1074.4621  | 819.974212 | 17  | 0  | 0             |
| 0  | 0  |            |            | 2   | 0  | 0             |
| 15 | 13 | 1637.09202 | 1215.25506 | 21  | 13 | 1 637.818363  |
| 3  | 0  | 1138.6677  | 1268.83586 | 8   | 0  | 0             |
| 21 | 0  | 1243.18758 | 592.664792 | 28  | 0  | 0             |
| 2  | 0  | 1074.4621  | 819.974212 | 17  | 0  | 0             |
| 0  | 0  |            |            | 2   | 0  | 0             |
| 15 | 13 | 1637.09202 | 1215.25506 | 21  | 13 | 1 637.818363  |
| 3  | 0  | 1138.6677  | 1268.83586 | 8   | 0  | 0             |
| 21 | 6  | 1243.18758 | 592.664792 | 28  | 6  | 2 568.336873  |
| 2  | 0  | 1805.85575 | 52.033518  | 13  | 0  | 0             |
| 2  | 0  | 511.434231 | 33.945748  | 7   | 0  | 0             |
| 12 | 10 | 1975.24216 | 1489.56641 | 17  | 10 | 1 453.258156  |
| 4  | 0  | 1676.9244  | 1356.4507  | 10  | 0  | 0             |
| 29 | 0  | 2022.69103 | 1007.95784 | 35  | 0  | 0             |
| 2  | 0  | 1805.85575 | 52.033518  | 19  | 0  | 0             |
| 3  | 0  | 470.743039 | 74.454524  | 9   | 0  | 0             |
| 13 | 10 | 2017.10063 | 1695.5448  | 17  | 10 | 1 488.541725  |
| 4  | 0  | 1678.32356 | 1359.0829  | 12  | 0  | 0             |
| 32 | 0  | 2039.17021 | 954.147341 | 42  | 0  | 0             |
| 2  | 0  | 1805.85575 | 52.033518  | 19  | 0  | 0             |
| 3  | 0  | 470.743039 | 74.454524  | 9   | 0  | 0             |
| 13 | 10 | 2017.10063 | 1695.5448  | 17  | 10 | 1 488.541725  |
| 4  | 0  | 1678.32356 | 1359.0829  | 12  | 0  | 0             |
| 32 | 7  | 2039.17021 | 954.147341 | 42  | 7  | 2 502.112328  |
| 40 | 20 | 1229.37084 | 725.187561 | 184 | 79 | 28 93.365752  |

AnnotatedResults

|     |    |            |            |     |     |    |            |
|-----|----|------------|------------|-----|-----|----|------------|
| 8   | 0  | 572.000832 | 309.024913 | 19  | 3   | 8  | 343.064856 |
| 9   | 5  | 642.85134  | 333.153743 | 57  | 9   | 7  | 96.622697  |
| 0   | 0  |            |            | 11  | 0   | 5  | 348.493097 |
| 37  | 24 | 1521.725   | 1009.7338  | 109 | 46  | 14 | 98.251169  |
| 43  | 0  | 1193.66889 | 724.536033 | 96  | 0   | 0  |            |
| 11  | 0  | 593.932755 | 280.359854 | 12  | 0   | 0  |            |
| 11  | 0  | 611.192098 | 296.351736 | 26  | 0   | 0  |            |
| 0   | 0  |            |            | 2   | 0   | 0  |            |
| 43  | 12 | 1561.67    | 963.824    | 73  | 15  | 1  | 605.792    |
| 43  | 7  | 1193.66889 | 724.536033 | 96  | 16  | 7  | 243.728038 |
| 11  | 4  | 593.932755 | 280.359854 | 12  | 4   | 1  | 210.072942 |
| 11  | 0  | 611.192098 | 296.351736 | 26  | 0   | 0  |            |
| 0   | 0  |            |            | 2   | 0   | 0  |            |
| 43  | 20 | 1561.67128 | 963.823681 | 73  | 23  | 3  | 200.844931 |
| 46  | 0  | 1687.12836 | 964.415172 | 98  | 0   | 0  |            |
| 13  | 0  | 562.747968 | 227.521478 | 15  | 0   | 0  |            |
| 14  | 0  | 700.961674 | 351.680221 | 28  | 0   | 0  |            |
| 2   | 0  | 319.578273 | 12.916108  | 7   | 0   | 0  |            |
| 43  | 9  | 1519.33815 | 728.223244 | 62  | 13  | 1  | 689.92948  |
| 47  | 0  | 1665.53909 | 946.516351 | 105 | 0   | 0  |            |
| 13  | 0  | 562.130556 | 228.193119 | 16  | 0   | 0  |            |
| 13  | 0  | 744.133102 | 396.089301 | 29  | 0   | 0  |            |
| 3   | 0  | 639.801493 | 554.718077 | 10  | 0   | 0  |            |
| 44  | 10 | 1519.96971 | 722.740917 | 65  | 13  | 1  | 698.614667 |
| 47  | 12 | 1665.53909 | 946.516351 | 105 | 20  | 5  | 271.412069 |
| 13  | 1  | 562.130556 | 228.193119 | 16  | 1   | 1  | 193.245393 |
| 13  | 0  | 744.133102 | 396.089301 | 29  | 0   | 0  |            |
| 3   | 0  | 639.801493 | 554.718077 | 10  | 0   | 0  |            |
| 44  | 11 | 1519.96971 | 722.740917 | 65  | 15  | 3  | 283.897025 |
| 1   | 0  | 410.697248 |            | 13  | 0   | 4  | 150.362286 |
| 3   | 0  | 1189.18919 | 1290.50098 | 28  | 4   | 1  | 247.527807 |
| 22  | 11 | 1296.7108  | 802.089763 | 158 | 79  | 28 | 104.222235 |
| 84  | 70 | 1546.2591  | 859.447333 | 189 | 105 | 22 | 130.820617 |
| 4   | 0  | 677.390473 | 317.621255 | 10  | 0   | 0  |            |
| 11  | 0  | 1092.19952 | 710.018592 | 22  | 0   | 0  |            |
| 27  | 0  | 1247.53859 | 772.755201 | 70  | 0   | 1  | 1048.73624 |
| 91  | 33 | 1658.09328 | 862.063701 | 128 | 35  | 2  | 927.143629 |
| 4   | 0  | 677.390473 | 317.621255 | 10  | 0   | 0  |            |
| 11  | 0  | 1092.19952 | 710.018592 | 22  | 0   | 0  |            |
| 27  | 2  | 1247.53859 | 772.755201 | 70  | 9   | 3  | 521.111173 |
| 91  | 56 | 1658.09328 | 862.063701 | 128 | 58  | 7  | 262.184059 |
| 5   | 0  | 608.849809 | 367.879175 | 13  | 0   | 0  |            |
| 12  | 0  | 1008.4683  | 878.063817 | 19  | 0   | 0  |            |
| 39  | 0  | 1425.45717 | 941.009245 | 102 | 3   | 1  | 1034.62281 |
| 108 | 32 | 2000.55468 | 1048.10785 | 145 | 33  | 2  | 944.514001 |
| 5   | 0  | 669.842224 | 336.525472 | 18  | 0   | 0  |            |
| 13  | 0  | 1211.02301 | 1005.58272 | 22  | 0   | 0  |            |
| 43  | 4  | 1403.92802 | 902.340847 | 118 | 12  | 2  | 534.681777 |
| 118 | 38 | 1909.06146 | 1051.13554 | 156 | 39  | 2  | 941.799881 |
| 5   | 0  | 669.842224 | 336.525472 | 18  | 0   | 0  |            |
| 13  | 0  | 1211.02301 | 1005.58272 | 22  | 1   | 1  | 1202.35547 |
| 43  | 5  | 1403.92802 | 902.340847 | 118 | 20  | 5  | 122.678255 |
| 118 | 87 | 1909.06146 | 1051.13554 | 156 | 88  | 11 | 187.274328 |
| 1   | 0  | 2695.16129 |            | 3   | 1   | 1  | 1405.91452 |
| 0   | 0  |            |            | 2   | 0   | 0  |            |
| 0   | 0  |            |            | 1   | 0   | 0  |            |
| 0   | 0  |            |            | 4   | 0   | 0  |            |
| 0   | 0  |            |            | 10  | 1   | 3  | 8291.63872 |

AnnotatedResults

|    |    |            |            |     |    |               |
|----|----|------------|------------|-----|----|---------------|
| 3  | 0  | 1234.03935 | 1265.9388  | 4   | 0  | 0             |
| 0  | 0  |            |            | 1   | 0  | 0             |
| 0  | 0  |            |            | 0   | 0  | 0             |
| 0  | 0  |            |            | 1   | 0  | 0             |
| 1  | 0  | 566.607143 |            | 6   | 0  | 0             |
| 3  | 0  | 1234.03935 | 1265.9388  | 4   | 0  | 0             |
| 0  | 0  |            |            | 1   | 0  | 0             |
| 0  | 0  |            |            | 0   | 0  | 0             |
| 0  | 0  |            |            | 1   | 0  | 0             |
| 1  | 0  | 566.607143 |            | 6   | 0  | 0             |
| 1  | 0  | 371.75     |            | 3   | 0  | 0             |
| 0  | 0  |            |            | 6   | 0  | 0             |
| 1  | 0  | 311.416667 |            | 1   | 0  | 0             |
| 3  | 0  | 465.000242 | 96.525874  | 4   | 0  | 0             |
| 2  | 0  | 608.848605 | 246.37645  | 9   | 0  | 0             |
| 1  | 0  | 1208.92361 |            | 3   | 0  | 0             |
| 2  | 0  | 1409.63497 | 719.670022 | 12  | 0  | 0             |
| 1  | 0  | 311.416667 |            | 1   | 0  | 0             |
| 3  | 0  | 588.689869 | 319.76599  | 4   | 0  | 0             |
| 3  | 0  | 532.671557 | 218.539483 | 11  | 0  | 0             |
| 1  | 0  | 1208.92361 |            | 3   | 0  | 0             |
| 2  | 0  | 1409.63497 | 719.670022 | 12  | 0  | 0             |
| 1  | 0  | 311.416667 |            | 1   | 0  | 0             |
| 3  | 0  | 588.689869 | 319.76599  | 4   | 0  | 0             |
| 3  | 0  | 532.671557 | 218.539483 | 11  | 0  | 0             |
| 2  | 0  | 501.322794 | 92.840001  | 33  | 5  | 5 137.877331  |
| 1  | 0  | 1965.46421 |            | 14  | 4  | 4 431.002366  |
| 3  | 0  | 544.683848 | 305.215472 | 15  | 0  | 0             |
| 7  | 0  | 1797.81155 | 881.768768 | 10  | 0  | 0             |
| 3  | 0  | 544.683848 | 305.215472 | 15  | 0  | 0             |
| 7  | 6  | 1797.81155 | 881.768768 | 10  | 6  | 1 427.745421  |
| 2  | 0  | 896.545455 | 396.751187 | 13  | 0  | 0             |
| 4  | 0  | 1950.25699 | 1207.19621 | 8   | 0  | 0             |
| 2  | 0  | 919.961538 | 429.86653  | 15  | 0  | 0             |
| 4  | 0  | 1960.75644 | 1224.21222 | 7   | 0  | 0             |
| 2  | 0  | 919.961538 | 429.86653  | 15  | 0  | 0             |
| 4  | 0  | 1960.75644 | 1224.21222 | 7   | 0  | 0             |
| 19 | 9  | 1298.5307  | 741.409467 | 67  | 35 | 20 112.364597 |
| 2  | 0  | 912.272059 | 391.77577  | 25  | 1  | 2 1250.12399  |
| 0  | 0  |            |            | 2   | 0  | 0             |
| 0  | 0  |            |            | 0   | 0  | 0             |
| 23 | 16 | 1596.43446 | 614.361245 | 116 | 54 | 21 94.994224  |
| 19 | 0  | 1332.82036 | 756.776255 | 31  | 0  | 2 1206.69806  |
| 3  | 0  | 793.543949 | 342.878171 | 13  | 0  | 0             |
| 0  | 0  |            |            | 0   | 0  | 0             |
| 0  | 0  |            |            | 0   | 0  | 0             |
| 36 | 15 | 1468.67778 | 728.938825 | 99  | 22 | 4 1306.03488  |
| 19 | 0  | 1332.82036 | 756.776255 | 31  | 1  | 4 875.032512  |
| 3  | 0  | 793.543949 | 342.878171 | 13  | 0  | 0             |
| 0  | 0  |            |            | 0   | 0  | 0             |
| 0  | 0  |            |            | 0   | 0  | 0             |
| 36 | 15 | 1468.67778 | 728.938825 | 99  | 26 | 6 425.574125  |
| 23 | 2  | 1260.94694 | 720.102809 | 33  | 2  | 2 943.971177  |
| 5  | 0  | 521.608087 | 214.298327 | 17  | 0  | 0             |
| 0  | 0  |            |            | 2   | 0  | 0             |
| 0  | 0  |            |            | 0   | 0  | 0             |
| 13 | 0  | 1515.03379 | 811.099603 | 50  | 0  | 0             |
| 26 | 2  | 1226.16705 | 702.975741 | 40  | 2  | 3 949.942243  |

AnnotatedResults

|    |    |            |            |    |    |              |
|----|----|------------|------------|----|----|--------------|
| 5  | 0  | 521.608087 | 214.298327 | 19 | 0  | 0            |
| 0  | 0  |            |            | 2  | 0  | 0            |
| 0  | 0  |            |            | 0  | 0  | 0            |
| 17 | 0  | 1544.17958 | 829.39301  | 55 | 0  | 0            |
| 26 | 2  | 1226.16705 | 702.975741 | 40 | 2  | 3 949.942243 |
| 5  | 0  | 521.608087 | 214.298327 | 19 | 0  | 0            |
| 0  | 0  |            |            | 2  | 0  | 0            |
| 0  | 0  |            |            | 0  | 0  | 0            |
| 17 | 7  | 1544.17958 | 829.39301  | 55 | 13 | 4 1009.6529  |
| 13 | 6  | 1576.4     | 1201.2     | 67 | 25 | 11 184.56    |
| 0  | 0  |            |            | 6  | 0  | 0            |
| 0  | 0  |            |            | 7  | 1  | 2 155.247704 |
| 16 | 0  | 1421.21329 | 1132.66072 | 28 | 0  | 0            |
| 0  | 0  |            |            | 3  | 0  | 0            |
| 0  | 0  |            |            | 2  | 0  | 0            |
| 16 | 6  | 1421.21329 | 1132.66072 | 28 | 6  | 3 356.635459 |
| 0  | 0  |            |            | 3  | 0  | 0            |
| 0  | 0  |            |            | 2  | 0  | 0            |
| 23 | 11 | 1850.10003 | 1063.39883 | 43 | 11 | 1 423.945652 |
| 1  | 0  | 480.052174 |            | 3  | 0  | 0            |
| 0  | 0  |            |            | 2  | 0  | 0            |
| 24 | 11 | 1867.57732 | 1036.10614 | 48 | 11 | 1 422.31718  |
| 1  | 0  | 480.052174 |            | 6  | 0  | 0            |
| 0  | 0  |            |            | 4  | 0  | 0            |
| 24 | 11 | 1867.57732 | 1036.10614 | 48 | 13 | 3 422.31718  |
| 1  | 0  | 480.052174 |            | 6  | 0  | 0            |
| 0  | 0  |            |            | 4  | 0  | 0            |
| 2  | 0  | 552.235769 | 231.848506 | 13 | 2  | 2 147.105342 |
| 1  | 0  | 1869.76911 |            | 3  | 0  | 1 7617.99396 |
| 43 | 34 | 898.485367 | 530.01129  | 71 | 41 | 6 296.924804 |
| 3  | 0  | 488.003333 | 198.126935 | 7  | 0  | 0            |
| 1  | 0  | 1869.76911 |            | 3  | 0  | 0            |
| 48 | 14 | 900.191567 | 511.311744 | 56 | 17 | 1 872.318391 |
| 3  | 0  | 488.003333 | 198.126935 | 7  | 0  | 0            |
| 1  | 0  | 1869.76911 |            | 3  | 0  | 0            |
| 48 | 29 | 900.191567 | 511.311744 | 56 | 32 | 3 538.481546 |
| 3  | 0  | 538.807639 | 294.629395 | 7  | 0  | 0            |
| 0  | 0  |            |            | 1  | 0  | 0            |
| 33 | 14 | 969.576828 | 607.300255 | 40 | 15 | 1 624.24776  |
| 4  | 0  | 487.626856 | 261.436182 | 11 | 0  | 0            |
| 0  | 0  |            |            | 3  | 0  | 0            |
| 36 | 13 | 938.871723 | 597.284531 | 48 | 14 | 1 529.796359 |
| 4  | 0  | 487.626856 | 261.436182 | 11 | 0  | 0            |
| 0  | 0  |            |            | 3  | 0  | 0            |
| 36 | 13 | 938.871723 | 597.284531 | 48 | 14 | 1 529.796359 |
| 1  | 0  | 764.93913  |            | 2  | 0  | 0            |
| 1  | 0  | 396.404494 |            | 10 | 2  | 1 748.554487 |
| 0  | 0  |            |            | 0  | 0  | 0            |
| 0  | 0  |            |            | 1  | 0  | 0            |
| 0  | 0  |            |            | 5  | 1  | 1 11260.3439 |
| 1  | 0  | 682.09009  |            | 2  | 0  | 0            |
| 1  | 0  | 336        |            | 14 | 0  | 0            |
| 0  | 0  |            |            | 0  | 0  | 0            |
| 0  | 0  |            |            | 0  | 0  | 0            |
| 2  | 0  | 581.533937 | 393.629174 | 6  | 0  | 0            |
| 1  | 0  | 682.09009  |            | 2  | 0  | 0            |
| 1  | 0  | 336        |            | 14 | 0  | 0            |
| 0  | 0  |            |            | 0  | 0  | 0            |

AnnotatedResults

|    |    |            |            |     |    |               |
|----|----|------------|------------|-----|----|---------------|
| 0  | 0  |            |            | 0   | 0  | 0             |
| 2  | 0  | 581.533937 | 393.629174 | 6   | 0  | 0             |
| 0  | 0  |            |            | 1   | 0  | 0             |
| 0  | 0  |            |            | 30  | 0  | 0             |
| 0  | 0  |            |            | 0   | 0  | 0             |
| 4  | 0  | 850.2859   | 495.425649 | 7   | 0  | 0             |
| 3  | 0  | 779.062561 | 315.138085 | 6   | 0  | 0             |
| 0  | 0  |            |            | 2   | 0  | 0             |
| 1  | 0  | 327.267606 |            | 107 | 0  | 0             |
| 1  | 0  | 614.871795 |            | 1   | 0  | 0             |
| 5  | 0  | 780.198896 | 452.540902 | 9   | 0  | 0             |
| 3  | 0  | 811.476625 | 264.60392  | 6   | 0  | 0             |
| 0  | 0  |            |            | 2   | 0  | 0             |
| 1  | 0  | 327.267606 |            | 107 | 0  | 0             |
| 1  | 0  | 614.871795 |            | 1   | 0  | 0             |
| 5  | 0  | 780.198896 | 452.540902 | 9   | 0  | 0             |
| 3  | 0  | 811.476625 | 264.60392  | 6   | 0  | 0             |
| 1  | 0  | 908.255474 |            | 3   | 0  | 0             |
| 3  | 0  | 355.960824 | 52.270413  | 14  | 0  | 1 406.57528   |
| 1  | 0  | 908.255474 |            | 2   | 0  | 0             |
| 5  | 0  | 406.098487 | 138.985007 | 10  | 0  | 0             |
| 1  | 0  | 908.255474 |            | 2   | 0  | 0             |
| 5  | 0  | 406.098487 | 138.985007 | 10  | 0  | 0             |
| 3  | 0  | 1198.69428 | 257.567621 | 4   | 0  | 0             |
| 5  | 0  | 477.605493 | 221.530457 | 7   | 0  | 0             |
| 3  | 0  | 1198.69428 | 257.567621 | 4   | 0  | 0             |
| 6  | 0  | 451.760133 | 208.010794 | 9   | 0  | 0             |
| 3  | 0  | 1198.69428 | 257.567621 | 4   | 0  | 0             |
| 6  | 0  | 451.760133 | 208.010794 | 9   | 0  | 0             |
| 3  | 0  | 448.793059 | 62.029602  | 22  | 7  | 3 621.533639  |
| 7  | 2  | 1240.93172 | 548.158398 | 20  | 5  | 3 155.790528  |
| 6  | 5  | 1385.85561 | 581.241369 | 39  | 9  | 4 372.377359  |
| 23 | 19 | 1354.31239 | 737.168239 | 47  | 23 | 12 134.077562 |
| 4  | 0  | 1607.65322 | 1288.52305 | 7   | 0  | 1 2284.7468   |
| 8  | 0  | 1274.18302 | 505.395841 | 14  | 0  | 0             |
| 9  | 0  | 1198.01877 | 593.110809 | 15  | 0  | 0             |
| 32 | 0  | 1561.40438 | 1047.57671 | 36  | 0  | 0             |
| 4  | 0  | 1607.65322 | 1288.52305 | 7   | 0  | 1 2284.7468   |
| 8  | 0  | 1274.18302 | 505.395841 | 14  | 0  | 1 868.518622  |
| 9  | 0  | 1198.01877 | 593.110809 | 15  | 0  | 0             |
| 32 | 6  | 1561.40438 | 1047.57671 | 36  | 6  | 1 757.782498  |
| 13 | 0  | 1407.32919 | 967.710599 | 14  | 0  | 1 1887.94236  |
| 8  | 0  | 1081.12958 | 444.710841 | 16  | 0  | 0             |
| 8  | 0  | 1650.77081 | 851.915027 | 21  | 0  | 0             |
| 24 | 0  | 1963.99412 | 1054.44536 | 28  | 0  | 0             |
| 14 | 0  | 1343.93772 | 957.07737  | 18  | 0  | 1 1908.02685  |
| 9  | 0  | 1098.42023 | 419.86613  | 17  | 0  | 0             |
| 7  | 0  | 1556.17027 | 890.819611 | 21  | 0  | 0             |
| 26 | 0  | 1869.69385 | 1045.62721 | 32  | 0  | 0             |
| 14 | 0  | 1343.93772 | 957.07737  | 18  | 0  | 1 1908.02685  |
| 9  | 0  | 1098.42023 | 419.86613  | 17  | 0  | 1 841.920239  |
| 7  | 0  | 1556.17027 | 890.819611 | 21  | 0  | 0             |
| 26 | 7  | 1869.69385 | 1045.62721 | 32  | 7  | 1 887.517467  |
| 0  | 0  |            |            | 3   | 0  | 0             |
| 0  | 0  |            |            | 0   | 0  | 0             |
| 1  | 0  | 408.315789 |            | 3   | 0  | 0             |
| 0  | 0  |            |            | 0   | 0  | 0             |
| 1  | 0  | 408.315789 |            | 3   | 0  | 0             |

AnnotatedResults

|    |   |            |            |     |    |              |
|----|---|------------|------------|-----|----|--------------|
| 0  | 0 |            |            | 0   | 0  | 0            |
| 1  | 0 | 502.764706 |            | 3   | 0  | 0            |
| 0  | 0 |            |            | 0   | 0  | 0            |
| 1  | 0 | 481.521127 |            | 5   | 0  | 0            |
| 0  | 0 |            |            | 1   | 0  | 0            |
| 1  | 0 | 481.521127 |            | 5   | 0  | 0            |
| 0  | 0 |            |            | 1   | 0  | 0            |
| 1  | 0 | 344.444444 |            | 12  | 0  | 3 7697.24629 |
| 5  | 0 | 435.100659 | 169.090525 | 14  | 2  | 5 5744.70786 |
| 12 | 2 | 933.252139 | 606.437849 | 44  | 7  | 3 112.907421 |
| 3  | 0 | 341.322974 | 36.581682  | 5   | 0  | 0            |
| 4  | 0 | 439.722982 | 175.147099 | 6   | 0  | 0            |
| 19 | 0 | 822.88129  | 526.727454 | 31  | 0  | 0            |
| 3  | 0 | 341.322974 | 36.581682  | 5   | 0  | 0            |
| 4  | 0 | 439.722982 | 175.147099 | 6   | 0  | 0            |
| 19 | 0 | 822.88129  | 526.727454 | 31  | 0  | 1 707.299853 |
| 4  | 0 | 430.947448 | 54.232463  | 7   | 0  | 0            |
| 2  | 0 | 740.18433  | 465.233151 | 3   | 0  | 0            |
| 4  | 0 | 1154.30887 | 898.285367 | 11  | 0  | 0            |
| 6  | 0 | 419.171247 | 41.35393   | 12  | 0  | 0            |
| 5  | 0 | 767.934776 | 433.719078 | 8   | 0  | 0            |
| 9  | 0 | 969.007253 | 611.81638  | 35  | 0  | 0            |
| 6  | 0 | 419.171247 | 41.35393   | 12  | 1  | 1 305.067166 |
| 5  | 0 | 767.934776 | 433.719078 | 8   | 0  | 0            |
| 9  | 0 | 969.007253 | 611.81638  | 35  | 0  | 2 1276.17955 |
| 0  | 0 |            |            | 4   | 0  | 1 103.679411 |
| 0  | 0 |            |            | 3   | 0  | 0            |
| 7  | 2 | 1773.533   | 793.272985 | 20  | 2  | 1 158.504649 |
| 25 | 5 | 1214.0169  | 653.784693 | 137 | 21 | 10 82.509269 |
| 0  | 0 |            |            | 0   | 0  | 0            |
| 2  | 0 | 1857.47681 | 391.834236 | 3   | 0  | 0            |
| 5  | 0 | 1690.03585 | 734.956656 | 9   | 0  | 0            |
| 32 | 0 | 1439.20248 | 976.742884 | 98  | 0  | 0            |
| 0  | 0 |            |            | 0   | 0  | 0            |
| 2  | 0 | 1857.47681 | 391.834236 | 3   | 0  | 0            |
| 5  | 0 | 1690.03585 | 734.956656 | 9   | 0  | 0            |
| 32 | 0 | 1439.20248 | 976.742884 | 98  | 0  | 0            |
| 1  | 0 | 1640.06324 |            | 4   | 0  | 0            |
| 2  | 0 | 2248.26486 | 130.154112 | 5   | 0  | 0            |
| 0  | 0 |            |            | 0   | 0  | 0            |
| 15 | 0 | 1233.40544 | 732.857652 | 107 | 0  | 0            |
| 3  | 0 | 1229.85149 | 509.578405 | 7   | 0  | 0            |
| 5  | 0 | 1677.79717 | 772.982069 | 11  | 0  | 0            |
| 6  | 0 | 1592.9574  | 1013.05498 | 7   | 0  | 0            |
| 22 | 0 | 1349.7022  | 995.059665 | 167 | 0  | 0            |
| 3  | 0 | 1229.85149 | 509.578405 | 7   | 0  | 0            |
| 5  | 0 | 1677.79717 | 772.982069 | 11  | 0  | 0            |
| 6  | 0 | 1592.9574  | 1013.05498 | 7   | 0  | 0            |
| 22 | 0 | 1349.7022  | 995.059665 | 167 | 0  | 0            |
| 2  | 0 | 827.014319 | 528.682864 | 8   | 1  | 2 530.339184 |
| 2  | 0 | 495.248555 | 69.494163  | 52  | 7  | 4 232.871556 |
| 0  | 0 |            |            | 22  | 2  | 1 540.652842 |
| 0  | 0 |            |            | 2   | 2  | 1 92.822928  |
| 0  | 0 |            |            | 9   | 0  | 0            |
| 1  | 0 | 1515.49    |            | 18  | 4  | 1 490.713    |
| 0  | 0 |            |            | 0   | 0  | 0            |
| 1  | 0 | 812.318471 |            | 23  | 3  | 8 94.4514    |
| 5  | 0 | 1063.90722 | 454.74494  | 9   | 0  | 0            |

AnnotatedResults

|    |   |            |            |     |   |   |           |
|----|---|------------|------------|-----|---|---|-----------|
| 2  | 0 | 495.248555 | 69.494163  | 26  | 0 | 0 |           |
| 1  | 0 | 358.344156 |            | 14  | 0 | 0 |           |
| 0  | 0 |            |            | 1   | 0 | 0 |           |
| 8  | 0 | 841.076201 | 365.720673 | 10  | 0 | 0 |           |
| 2  | 0 | 1034.67282 | 1034.50077 | 5   | 0 | 0 |           |
| 0  | 0 |            |            | 1   | 0 | 0 |           |
| 2  | 0 | 890.066212 | 109.95191  | 4   | 0 | 0 |           |
| 5  | 0 | 1063.90722 | 454.74494  | 9   | 0 | 0 |           |
| 2  | 0 | 495.248555 | 69.494163  | 26  | 0 | 0 |           |
| 1  | 0 | 358.344156 |            | 14  | 0 | 0 |           |
| 0  | 0 |            |            | 1   | 0 | 0 |           |
| 8  | 0 | 841.076201 | 365.720673 | 10  | 0 | 0 |           |
| 2  | 0 | 1034.67282 | 1034.50077 | 5   | 0 | 0 |           |
| 0  | 0 |            |            | 1   | 0 | 0 |           |
| 2  | 0 | 890.066212 | 109.95191  | 4   | 0 | 0 |           |
| 5  | 0 | 764.671074 | 780.11115  | 6   | 0 | 0 |           |
| 1  | 0 | 306.1375   |            | 66  | 0 | 0 |           |
| 1  | 0 | 1322.12048 |            | 12  | 0 | 0 |           |
| 0  | 0 |            |            | 3   | 0 | 0 |           |
| 1  | 0 | 400.903885 |            | 4   | 0 | 0 |           |
| 1  | 0 | 568.746392 |            | 9   | 0 | 0 |           |
| 1  | 0 | 434.794872 |            | 2   | 0 | 0 |           |
| 1  | 0 | 890.828025 |            | 6   | 0 | 0 |           |
| 8  | 0 | 808.559503 | 572.568867 | 11  | 0 | 0 |           |
| 4  | 0 | 399.267259 | 101.158729 | 211 | 0 | 0 |           |
| 2  | 0 | 935.629206 | 546.581203 | 21  | 0 | 0 |           |
| 0  | 0 |            |            | 4   | 0 | 0 |           |
| 2  | 0 | 522.184141 | 170.935871 | 10  | 0 | 0 |           |
| 1  | 0 | 568.746392 |            | 10  | 0 | 0 |           |
| 1  | 0 | 418.691358 |            | 4   | 0 | 0 |           |
| 1  | 0 | 890.828025 |            | 7   | 0 | 0 |           |
| 8  | 0 | 808.559503 | 572.568867 | 11  | 0 | 0 |           |
| 4  | 0 | 399.267259 | 101.158729 | 211 | 0 | 0 |           |
| 2  | 0 | 935.629206 | 546.581203 | 21  | 0 | 0 |           |
| 0  | 0 |            |            | 4   | 0 | 0 |           |
| 2  | 0 | 522.184141 | 170.935871 | 10  | 0 | 0 |           |
| 1  | 0 | 568.746392 |            | 10  | 0 | 0 |           |
| 1  | 0 | 418.691358 |            | 4   | 0 | 0 |           |
| 1  | 0 | 890.828025 |            | 7   | 0 | 0 |           |
| 0  | 0 |            |            | 2   | 0 | 0 |           |
| 3  | 0 | 1430.42313 | 1349.70326 | 3   | 0 | 0 |           |
| 0  | 0 |            |            | 1   | 0 | 0 |           |
| 0  | 0 |            |            | 2   | 0 | 0 |           |
| 6  | 0 | 1219.21779 | 934.092096 | 6   | 0 | 0 |           |
| 0  | 0 |            |            | 1   | 0 | 0 |           |
| 0  | 0 |            |            | 2   | 0 | 0 |           |
| 6  | 0 | 1219.21779 | 934.092096 | 6   | 0 | 0 |           |
| 0  | 0 |            |            | 1   | 0 | 0 |           |
| 0  | 0 |            |            | 1   | 0 | 0 |           |
| 11 | 0 | 1050.71355 | 841.684286 | 15  | 0 | 0 |           |
| 0  | 0 |            |            | 1   | 0 | 0 |           |
| 0  | 0 |            |            | 1   | 0 | 0 |           |
| 11 | 0 | 1048.27878 | 838.409533 | 15  | 0 | 0 |           |
| 0  | 0 |            |            | 2   | 0 | 0 |           |
| 0  | 0 |            |            | 1   | 0 | 0 |           |
| 11 | 5 | 1048.27878 | 838.409533 | 15  | 5 | 1 | 305.60999 |
| 0  | 0 |            |            | 2   | 0 | 0 |           |
| 1  | 0 | 421.591837 |            | 35  | 8 | 9 | 85.22339  |



AnnotatedResults

|    |    |            |            |     |    |    |            |
|----|----|------------|------------|-----|----|----|------------|
| 1  | 0  | 306.865672 |            | 13  | 7  | 9  | 171.532428 |
| 21 | 2  | 1175.34601 | 650.309683 | 52  | 10 | 6  | 164.475714 |
| 2  | 0  | 3867.59852 | 65.217538  | 4   | 0  | 0  |            |
| 2  | 0  | 391.372936 | 29.235946  | 9   | 0  | 0  |            |
| 3  | 0  | 1768.15078 | 2400.98328 | 6   | 0  | 0  |            |
| 25 | 0  | 1130.42261 | 637.732705 | 42  | 0  | 0  |            |
| 4  | 0  | 2940.96919 | 1078.88797 | 4   | 0  | 0  |            |
| 2  | 0  | 391.372936 | 29.235946  | 9   | 0  | 1  | 278.468783 |
| 3  | 0  | 1768.15078 | 2400.98328 | 6   | 2  | 1  | 230.700259 |
| 25 | 0  | 1130.42261 | 637.732705 | 42  | 0  | 0  |            |
| 4  | 0  | 2940.96919 | 1078.88797 | 4   | 0  | 0  |            |
| 0  | 0  |            |            | 12  | 0  | 0  |            |
| 5  | 0  | 343.004988 | 43.250466  | 10  | 0  | 0  |            |
| 28 | 0  | 1383.02734 | 808.42486  | 47  | 0  | 0  |            |
| 2  | 0  | 2634.02709 | 1831.59236 | 5   | 0  | 0  |            |
| 1  | 0  | 312.598039 |            | 16  | 0  | 0  |            |
| 7  | 0  | 390.900957 | 119.028187 | 13  | 0  | 0  |            |
| 28 | 0  | 1362.93519 | 802.628593 | 50  | 0  | 0  |            |
| 2  | 0  | 2634.02709 | 1831.59236 | 8   | 0  | 0  |            |
| 1  | 0  | 312.598039 |            | 16  | 0  | 0  |            |
| 7  | 0  | 390.900957 | 119.028187 | 13  | 1  | 1  | 308.324111 |
| 28 | 5  | 1362.93519 | 802.628593 | 50  | 6  | 1  | 459.229221 |
| 2  | 0  | 2634.02709 | 1831.59236 | 8   | 0  | 0  |            |
| 0  | 0  |            |            | 6   | 0  | 0  |            |
| 0  | 0  |            |            | 2   | 0  | 0  |            |
| 21 | 13 | 1315.65959 | 1019.10411 | 35  | 18 | 12 | 180.217614 |
| 11 | 6  | 679.601298 | 346.846391 | 35  | 7  | 8  | 161.218769 |
| 0  | 0  |            |            | 4   | 0  | 0  |            |
| 0  | 0  |            |            | 0   | 0  | 0  |            |
| 25 | 0  | 1252.23134 | 901.290691 | 30  | 0  | 0  |            |
| 14 | 0  | 669.415352 | 361.136269 | 21  | 0  | 0  |            |
| 0  | 0  |            |            | 4   | 0  | 0  |            |
| 0  | 0  |            |            | 0   | 0  | 0  |            |
| 25 | 13 | 1252.23134 | 901.290691 | 30  | 13 | 2  | 352.292866 |
| 14 | 6  | 669.415352 | 361.136269 | 21  | 8  | 2  | 443.487321 |
| 0  | 0  |            |            | 2   | 0  | 0  |            |
| 0  | 0  |            |            | 2   | 0  | 0  |            |
| 20 | 0  | 1334.73582 | 1098.96791 | 30  | 0  | 0  |            |
| 20 | 2  | 930.065393 | 641.517291 | 26  | 2  | 1  | 539.02437  |
| 0  | 0  |            |            | 7   | 0  | 0  |            |
| 0  | 0  |            |            | 5   | 0  | 0  |            |
| 21 | 0  | 1377.21614 | 1065.18512 | 33  | 0  | 0  |            |
| 22 | 2  | 874.054303 | 605.873936 | 29  | 2  | 1  | 359.34958  |
| 0  | 0  |            |            | 7   | 0  | 0  |            |
| 0  | 0  |            |            | 5   | 0  | 0  |            |
| 21 | 6  | 1377.21614 | 1065.18512 | 33  | 6  | 2  | 359.892404 |
| 22 | 13 | 874.054303 | 605.873936 | 29  | 13 | 3  | 257.841466 |
| 38 | 25 | 1829.42856 | 965.513477 | 113 | 36 | 14 | 89.565983  |
| 0  | 0  |            |            | 0   | 0  | 0  |            |
| 0  | 0  |            |            | 0   | 0  | 0  |            |
| 1  | 0  | 784.527473 |            | 12  | 0  | 0  |            |
| 1  | 0  | 355.584416 |            | 2   | 0  | 0  |            |
| 41 | 10 | 1600.10523 | 822.221966 | 75  | 10 | 1  | 609.591508 |
| 0  | 0  |            |            | 0   | 0  | 0  |            |
| 0  | 0  |            |            | 0   | 0  | 0  |            |
| 0  | 0  |            |            | 5   | 0  | 0  |            |
| 2  | 0  | 449.791304 | 109.353551 | 3   | 0  | 0  |            |
| 41 | 10 | 1600.10523 | 822.221966 | 75  | 10 | 1  | 609.591508 |

AnnotatedResults

|    |    |            |            |    |    |              |
|----|----|------------|------------|----|----|--------------|
| 0  | 0  |            |            | 0  | 0  | 0            |
| 0  | 0  |            |            | 0  | 0  | 0            |
| 0  | 0  |            |            | 5  | 0  | 0            |
| 2  | 0  | 449.791304 | 109.353551 | 3  | 0  | 0            |
| 47 | 0  | 1952.33919 | 1041.26934 | 84 | 0  | 0            |
| 0  | 0  |            |            | 0  | 0  | 0            |
| 0  | 0  |            |            | 0  | 0  | 0            |
| 0  | 0  |            |            | 11 | 0  | 0            |
| 2  | 0  | 698.212308 | 267.042683 | 3  | 0  | 0            |
| 51 | 10 | 1992.61684 | 1062.09595 | 92 | 10 | 1 545.538259 |
| 0  | 0  |            |            | 0  | 0  | 0            |
| 0  | 0  |            |            | 0  | 0  | 0            |
| 0  | 0  |            |            | 13 | 0  | 0            |
| 2  | 0  | 698.212308 | 267.042683 | 5  | 0  | 0            |
| 51 | 30 | 1992.61684 | 1062.09595 | 92 | 32 | 4 332.208373 |
| 0  | 0  |            |            | 0  | 0  | 0            |
| 0  | 0  |            |            | 0  | 0  | 0            |
| 0  | 0  |            |            | 13 | 0  | 0            |
| 2  | 0  | 698.212308 | 267.042683 | 5  | 0  | 0            |
| 0  | 0  |            |            | 5  | 0  | 0            |
| 0  | 0  |            |            | 1  | 0  | 0            |
| 2  | 0  | 1952.42109 | 401.688231 | 13 | 1  | 1 629.133177 |
| 43 | 39 | 1248.34003 | 662.890442 | 71 | 48 | 9 151.990759 |
| 4  | 2  | 712.447138 | 212.317384 | 22 | 9  | 8 207.358821 |
| 1  | 0  | 396.444444 |            | 7  | 0  | 0            |
| 0  | 0  |            |            | 1  | 0  | 0            |
| 9  | 0  | 1688.49639 | 474.614954 | 14 | 0  | 0            |
| 49 | 15 | 1342.28984 | 656.55506  | 61 | 15 | 1 1017.25244 |
| 4  | 0  | 749.344261 | 214.020525 | 9  | 0  | 0            |
| 1  | 0  | 396.444444 |            | 7  | 0  | 0            |
| 0  | 0  |            |            | 1  | 0  | 0            |
| 9  | 0  | 1688.49639 | 474.614954 | 14 | 0  | 0            |
| 49 | 24 | 1342.28984 | 656.55506  | 61 | 24 | 2 744.211894 |
| 4  | 0  | 749.344261 | 214.020525 | 9  | 0  | 0            |
| 1  | 0  | 624.565217 |            | 9  | 0  | 0            |
| 0  | 0  |            |            | 0  | 0  | 0            |
| 6  | 0  | 2123.03487 | 700.749374 | 8  | 0  | 0            |
| 35 | 0  | 1570.61782 | 865.315005 | 41 | 0  | 0            |
| 8  | 0  | 920.674855 | 303.244632 | 17 | 3  | 1 440.230377 |
| 0  | 0  |            |            | 11 | 0  | 0            |
| 0  | 0  |            |            | 0  | 0  | 0            |
| 6  | 0  | 2093.56652 | 1001.87754 | 8  | 0  | 0            |
| 37 | 0  | 1495.74833 | 857.389125 | 48 | 0  | 0            |
| 10 | 0  | 885.517241 | 301.268124 | 20 | 3  | 1 441.858849 |
| 0  | 0  |            |            | 11 | 0  | 0            |
| 0  | 0  |            |            | 0  | 0  | 0            |
| 6  | 0  | 2093.56652 | 1001.87754 | 8  | 0  | 0            |
| 37 | 14 | 1495.74833 | 857.389125 | 48 | 15 | 2 485.28478  |
| 10 | 0  | 885.517241 | 301.268124 | 20 | 3  | 2 441.858849 |
| 0  | 0  |            |            | 1  | 0  | 0            |
| 0  | 0  |            |            | 1  | 0  | 0            |
| 0  | 0  |            |            | 0  | 0  | 0            |
| 0  | 0  |            |            | 0  | 0  | 0            |
| 0  | 0  |            |            | 0  | 0  | 0            |
| 0  | 0  |            |            | 0  | 0  | 0            |
| 0  | 0  |            |            | 3  | 0  | 0            |
| 0  | 0  |            |            | 0  | 0  | 0            |
| 0  | 0  |            |            | 0  | 0  | 0            |
| 0  | 0  |            |            | 0  | 0  | 0            |

AnnotatedResults

|    |    |            |            |     |     |               |
|----|----|------------|------------|-----|-----|---------------|
| 0  | 0  |            |            | 0   | 0   | 0             |
| 0  | 0  |            |            | 3   | 0   | 0             |
| 0  | 0  |            |            | 0   | 0   | 0             |
| 0  | 0  |            |            | 0   | 0   | 0             |
| 0  | 0  |            |            | 0   | 0   | 0             |
| 0  | 0  |            |            | 0   | 0   | 0             |
| 0  | 0  |            |            | 0   | 0   | 0             |
| 2  | 0  | 601.259905 | 39.570877  | 9   | 0   | 0             |
| 0  | 0  |            |            | 1   | 0   | 0             |
| 0  | 0  |            |            | 2   | 0   | 0             |
| 0  | 0  |            |            | 0   | 0   | 0             |
| 0  | 0  |            |            | 1   | 0   | 0             |
| 4  | 0  | 489.339961 | 136.68716  | 13  | 0   | 0             |
| 0  | 0  |            |            | 3   | 0   | 0             |
| 0  | 0  |            |            | 3   | 0   | 0             |
| 0  | 0  |            |            | 0   | 0   | 0             |
| 1  | 0  | 429.21547  |            | 2   | 0   | 0             |
| 4  | 0  | 489.339961 | 136.68716  | 13  | 0   | 0             |
| 0  | 0  |            |            | 3   | 0   | 0             |
| 0  | 0  |            |            | 3   | 0   | 0             |
| 0  | 0  |            |            | 0   | 0   | 0             |
| 1  | 0  | 429.21547  |            | 2   | 0   | 0             |
| 45 | 30 | 1119.23748 | 569.010574 | 321 | 205 | 63 137.334507 |
| 15 | 10 | 1491.2307  | 561.891477 | 44  | 13  | 3 306.695638  |
| 14 | 9  | 1400.35646 | 932.167934 | 62  | 22  | 11 107.479179 |
| 43 | 27 | 1909.73063 | 1015.92201 | 132 | 49  | 14 139.505804 |
| 8  | 3  | 448.302517 | 139.75245  | 33  | 5   | 6 104.765059  |
| 50 | 10 | 1086.88937 | 569.108877 | 150 | 13  | 3 845.177184  |
| 17 | 0  | 1464.41609 | 761.786504 | 27  | 0   | 0             |
| 17 | 0  | 1390.41474 | 899.375455 | 25  | 0   | 1 524.368118  |
| 40 | 12 | 1932.67218 | 1001.15381 | 66  | 14  | 1 1134.50245  |
| 13 | 5  | 445.167651 | 130.154538 | 22  | 5   | 1 453.80098   |
| 50 | 16 | 1086.88937 | 569.108877 | 150 | 56  | 12 277.383135 |
| 17 | 0  | 1464.41609 | 761.786504 | 27  | 0   | 0             |
| 17 | 0  | 1390.41474 | 899.375455 | 25  | 0   | 1 524.368118  |
| 40 | 18 | 1932.67218 | 1001.15381 | 66  | 20  | 2 242.64239   |
| 13 | 10 | 445.167651 | 130.154538 | 22  | 10  | 2 376.177128  |
| 49 | 8  | 1179.73922 | 785.737745 | 135 | 16  | 2 449.458387  |
| 18 | 0  | 1160.21452 | 700.285405 | 33  | 0   | 0             |
| 25 | 0  | 1610.45435 | 1112.98364 | 44  | 2   | 1 485.827604  |
| 38 | 15 | 2362.57673 | 1065.90608 | 72  | 17  | 1 1139.38787  |
| 20 | 0  | 518.711074 | 191.480578 | 30  | 0   | 0             |
| 52 | 7  | 1194.53949 | 776.887612 | 148 | 16  | 2 444.030146  |
| 18 | 0  | 1154.37271 | 699.325619 | 36  | 0   | 0             |
| 27 | 0  | 1525.68271 | 1102.33361 | 50  | 2   | 1 493.427142  |
| 41 | 15 | 2283.59334 | 1119.01583 | 84  | 17  | 1 1142.10199  |
| 22 | 0  | 522.305069 | 182.436248 | 34  | 0   | 0             |
| 52 | 19 | 1194.53949 | 776.887612 | 148 | 56  | 14 403.861159 |
| 18 | 6  | 1154.37271 | 699.325619 | 36  | 9   | 2 291.496563  |
| 27 | 5  | 1525.68271 | 1102.33361 | 50  | 7   | 4 364.234997  |
| 41 | 24 | 2283.59334 | 1119.01583 | 84  | 31  | 6 275.754662  |
| 22 | 0  | 522.305069 | 182.436248 | 34  | 0   | 1 229.614611  |
| 1  | 0  | 1499.89623 |            | 22  | 1   | 1 5079.74829  |
| 0  | 0  |            |            | 27  | 4   | 8 7498.57265  |
| 6  | 0  | 1089.92116 | 400.522588 | 13  | 0   | 0             |
| 62 | 55 | 1809.14256 | 971.50843  | 103 | 63  | 18 103.679411 |
| 2  | 0  | 411.157647 | 66.577847  | 5   | 0   | 0             |
| 1  | 0  | 1499.89623 |            | 12  | 0   | 0             |
| 2  | 0  | 424.588115 | 119.808139 | 14  | 0   | 0             |

AnnotatedResults

|     |    |            |            |     |    |              |
|-----|----|------------|------------|-----|----|--------------|
| 5   | 0  | 1112.16007 | 428.524888 | 9   | 0  | 0            |
| 73  | 29 | 1725.14951 | 1047.45327 | 81  | 29 | 2 658.988504 |
| 3   | 0  | 402.803223 | 40.399295  | 5   | 0  | 0            |
| 1   | 0  | 1499.89623 |            | 12  | 0  | 0            |
| 2   | 0  | 424.588115 | 119.808139 | 14  | 0  | 0            |
| 5   | 0  | 1112.16007 | 428.524888 | 9   | 0  | 0            |
| 73  | 47 | 1725.14951 | 1047.45327 | 81  | 47 | 7 204.6447   |
| 3   | 0  | 402.803223 | 40.399295  | 5   | 0  | 0            |
| 2   | 0  | 1219.52254 | 1164.14484 | 16  | 0  | 0            |
| 2   | 0  | 538.124695 | 53.881968  | 9   | 0  | 0            |
| 5   | 0  | 1278.48959 | 436.56392  | 7   | 0  | 0            |
| 90  | 35 | 1941.28655 | 1341.26387 | 105 | 36 | 3 610.134332 |
| 3   | 0  | 735.656494 | 220.203869 | 4   | 0  | 0            |
| 2   | 0  | 1192.16498 | 1125.45542 | 16  | 0  | 0            |
| 1   | 0  | 516.831933 |            | 9   | 0  | 0            |
| 6   | 0  | 1230.18293 | 537.809    | 11  | 0  | 0            |
| 100 | 47 | 1863.24946 | 1300.13694 | 119 | 50 | 4 610.134332 |
| 4   | 0  | 627.620948 | 272.652313 | 7   | 0  | 0            |
| 2   | 0  | 1192.16498 | 1125.45542 | 16  | 0  | 0            |
| 1   | 0  | 516.831933 |            | 9   | 0  | 1 242.099566 |
| 6   | 0  | 1230.18293 | 537.809    | 11  | 0  | 0            |
| 100 | 70 | 1863.24946 | 1300.13694 | 119 | 74 | 8 230.157435 |
| 4   | 0  | 627.620948 | 272.652313 | 7   | 0  | 0            |
| 1   | 0  | 436.5      |            | 4   | 2  | 2 444.57297  |
| 11  | 5  | 1208.11885 | 518.99138  | 37  | 10 | 8 283.3542   |
| 2   | 0  | 506.204471 | 140.967027 | 3   | 0  | 1 235.585676 |
| 0   | 0  |            |            | 0   | 0  | 0            |
| 0   | 0  |            |            | 0   | 0  | 0            |
| 1   | 0  | 468.966942 |            | 2   | 0  | 0            |
| 14  | 0  | 1358.16452 | 704.300012 | 18  | 0  | 0            |
| 2   | 0  | 506.204471 | 140.967027 | 3   | 0  | 0            |
| 0   | 0  |            |            | 0   | 0  | 0            |
| 0   | 0  |            |            | 0   | 0  | 0            |
| 1   | 0  | 468.966942 |            | 2   | 0  | 1 451.086859 |
| 14  | 0  | 1358.16452 | 704.300012 | 18  | 0  | 0            |
| 2   | 0  | 506.204471 | 140.967027 | 3   | 0  | 0            |
| 0   | 0  |            |            | 0   | 0  | 0            |
| 0   | 0  |            |            | 0   | 0  | 0            |
| 4   | 0  | 1120.56168 | 565.012124 | 5   | 0  | 0            |
| 21  | 0  | 1661.1414  | 948.299046 | 25  | 0  | 0            |
| 0   | 0  |            |            | 2   | 0  | 0            |
| 0   | 0  |            |            | 2   | 0  | 0            |
| 1   | 0  | 1705.25    |            | 3   | 0  | 0            |
| 5   | 0  | 965.895658 | 589.401356 | 8   | 0  | 1 505.912097 |
| 22  | 0  | 1625.9865  | 947.893871 | 29  | 0  | 0            |
| 1   | 0  | 450.53125  |            | 4   | 0  | 0            |
| 2   | 0  | 555.70625  | 271.944429 | 3   | 0  | 0            |
| 1   | 0  | 1705.25    |            | 3   | 0  | 0            |
| 5   | 0  | 965.895658 | 589.401356 | 8   | 0  | 1 505.912097 |
| 22  | 8  | 1625.9865  | 947.893871 | 29  | 8  | 2 431.54519  |
| 1   | 0  | 450.53125  |            | 4   | 0  | 0            |
| 2   | 0  | 555.70625  | 271.944429 | 3   | 0  | 0            |
| 1   | 0  | 1705.25    |            | 3   | 0  | 0            |
| 13  | 5  | 1105.2041  | 471.227382 | 54  | 9  | 6 254.041697 |
| 32  | 21 | 1806.46107 | 893.248754 | 92  | 27 | 9 177.503493 |
| 1   | 0  | 1089.02308 |            | 8   | 1  | 1 88.480335  |
| 0   | 0  |            |            | 1   | 0  | 1 10029.7616 |
| 16  | 0  | 1176.09781 | 651.472241 | 30  | 0  | 0            |

AnnotatedResults

|    |    |            |            |     |     |               |
|----|----|------------|------------|-----|-----|---------------|
| 36 | 0  | 1737.39209 | 918.783001 | 59  | 0   | 0             |
| 1  | 0  | 1103.91729 |            | 2   | 0   | 0             |
| 1  | 0  | 355.78673  |            | 2   | 0   | 0             |
| 16 | 0  | 1176.09781 | 651.472241 | 30  | 0   | 0             |
| 36 | 9  | 1737.39209 | 918.783001 | 59  | 9   | 1 530.339184  |
| 1  | 0  | 1103.91729 |            | 2   | 1   | 1 344.693328  |
| 1  | 0  | 355.78673  |            | 2   | 0   | 0             |
| 23 | 0  | 1269.43111 | 742.833551 | 32  | 0   | 0             |
| 29 | 0  | 2118.67829 | 1329.06741 | 43  | 0   | 0             |
| 11 | 0  | 638.450172 | 492.182374 | 21  | 1   | 1 345.236152  |
| 1  | 0  | 1421.21739 |            | 7   | 0   | 0             |
| 25 | 8  | 1215.68566 | 737.917781 | 36  | 10  | 1 522.739646  |
| 33 | 10 | 2143.66944 | 1223.02626 | 62  | 10  | 1 435.344959  |
| 10 | 0  | 697.690177 | 497.734307 | 21  | 1   | 1 341.436383  |
| 10 | 0  | 809.646305 | 195.019702 | 23  | 0   | 0             |
| 25 | 8  | 1215.68566 | 737.917781 | 36  | 10  | 1 522.739646  |
| 33 | 16 | 2143.66944 | 1223.02626 | 62  | 16  | 2 401.147039  |
| 10 | 2  | 697.690177 | 497.734307 | 21  | 3   | 2 194.331042  |
| 10 | 0  | 809.646305 | 195.019702 | 23  | 0   | 0             |
| 1  | 0  | 414.978355 |            | 1   | 0   | 0             |
| 0  | 0  |            |            | 3   | 0   | 0             |
| 28 | 23 | 1696.31602 | 929.055861 | 130 | 75  | 27 93.908576  |
| 51 | 40 | 1366.47    | 753.377    | 123 | 62  | 19 128.649    |
| 1  | 0  | 414.978355 |            | 1   | 0   | 0             |
| 0  | 0  |            |            | 2   | 0   | 0             |
| 30 | 0  | 1811.6832  | 903.735321 | 63  | 0   | 0             |
| 56 | 19 | 1364.8538  | 756.498522 | 80  | 19  | 1 1334.26173  |
| 1  | 0  | 414.978355 |            | 1   | 0   | 0             |
| 0  | 0  |            |            | 2   | 0   | 0             |
| 30 | 12 | 1811.6832  | 903.735321 | 63  | 15  | 4 162.847242  |
| 56 | 25 | 1364.8538  | 756.498522 | 80  | 26  | 2 318.094945  |
| 1  | 0  | 357.866197 |            | 1   | 0   | 0             |
| 1  | 0  | 575.038674 |            | 3   | 0   | 0             |
| 43 | 0  | 2097.75282 | 1179.56395 | 73  | 0   | 0             |
| 62 | 22 | 1690.13061 | 961.704609 | 93  | 22  | 1 1319.60548  |
| 1  | 0  | 357.866197 |            | 1   | 0   | 0             |
| 1  | 0  | 575.038674 |            | 4   | 0   | 0             |
| 42 | 0  | 2115.53562 | 1189.65594 | 73  | 0   | 0             |
| 66 | 24 | 1697.9236  | 983.616083 | 100 | 24  | 1 1323.94807  |
| 1  | 0  | 357.866197 |            | 1   | 0   | 0             |
| 1  | 0  | 575.038674 |            | 4   | 0   | 0             |
| 42 | 16 | 2115.53562 | 1189.65594 | 73  | 16  | 5 227.986138  |
| 66 | 43 | 1697.9236  | 983.616083 | 100 | 44  | 4 320.266242  |
| 13 | 9  | 1725.28022 | 904.435315 | 77  | 24  | 8 140.048628  |
| 90 | 79 | 1298.31    | 717.073    | 184 | 143 | 38 112.365    |
| 12 | 6  | 1727.30703 | 905.841399 | 95  | 33  | 13 119.964135 |
| 1  | 0  | 359.686047 |            | 9   | 3   | 4 98.793993   |
| 4  | 4  | 832.309295 | 611.210621 | 29  | 12  | 5 254.041697  |
| 18 | 7  | 1839.09221 | 943.277789 | 41  | 11  | 1 362.063701  |
| 87 | 52 | 1325.00863 | 694.465814 | 113 | 64  | 7 363.149349  |
| 13 | 0  | 1602.79644 | 917.683336 | 53  | 0   | 0             |
| 0  | 0  |            |            | 2   | 0   | 0             |
| 7  | 0  | 699.848271 | 247.105059 | 13  | 0   | 0             |
| 18 | 15 | 1839.09221 | 943.277789 | 41  | 19  | 2 362.063701  |
| 87 | 62 | 1325.00863 | 694.465814 | 113 | 80  | 11 264.89818  |
| 13 | 4  | 1602.79644 | 917.683336 | 53  | 7   | 3 231.243083  |
| 0  | 0  |            |            | 2   | 0   | 0             |
| 7  | 0  | 699.848271 | 247.105059 | 13  | 0   | 0             |

AnnotatedResults

|    |    |            |            |    |    |    |            |
|----|----|------------|------------|----|----|----|------------|
| 25 | 18 | 2328.59316 | 1249.11363 | 52 | 20 | 2  | 238.842621 |
| 78 | 53 | 1467.36279 | 868.091705 | 96 | 59 | 6  | 415.260466 |
| 19 | 0  | 1682.86312 | 1001.75495 | 54 | 0  | 0  |            |
| 7  | 0  | 518.650551 | 204.984738 | 14 | 0  | 0  |            |
| 13 | 0  | 845.205635 | 578.256634 | 27 | 0  | 0  |            |
| 24 | 18 | 2390.78997 | 1225.13541 | 52 | 20 | 2  | 238.842621 |
| 75 | 49 | 1550.32334 | 885.885966 | 97 | 58 | 6  | 417.431763 |
| 19 | 0  | 1704.18429 | 995.526036 | 58 | 0  | 0  |            |
| 7  | 0  | 510.604476 | 208.084541 | 15 | 0  | 0  |            |
| 13 | 0  | 855.005948 | 570.010178 | 34 | 0  | 0  |            |
| 24 | 18 | 2390.78997 | 1225.13541 | 52 | 23 | 3  | 238.842621 |
| 75 | 54 | 1550.32334 | 885.885966 | 97 | 70 | 11 | 152.533583 |
| 19 | 6  | 1704.18429 | 995.526036 | 58 | 7  | 3  | 339.807911 |
| 7  | 0  | 510.604476 | 208.084541 | 15 | 0  | 0  |            |
| 13 | 4  | 855.005948 | 570.010178 | 34 | 10 | 2  | 420.145883 |
| 7  | 4  | 623.050277 | 280.076045 | 27 | 6  | 7  | 158.504649 |
| 4  | 0  | 1153.74438 | 398.589723 | 22 | 4  | 3  | 204.6447   |
| 0  | 0  |            |            | 0  | 0  | 0  |            |
| 1  | 1  | 354.255319 |            | 11 | 1  | 1  | 85.766214  |
| 6  | 0  | 555.866913 | 296.365845 | 12 | 0  | 0  |            |
| 9  | 0  | 1190.55827 | 404.049131 | 14 | 0  | 1  | 4200.91601 |
| 1  | 0  | 707.826087 |            | 1  | 0  | 0  |            |
| 3  | 0  | 335.068213 | 38.186497  | 7  | 0  | 0  |            |
| 6  | 0  | 555.866913 | 296.365845 | 12 | 0  | 0  |            |
| 9  | 0  | 1190.55827 | 404.049131 | 14 | 0  | 1  | 4200.91601 |
| 1  | 0  | 707.826087 |            | 1  | 0  | 0  |            |
| 3  | 0  | 335.068213 | 38.186497  | 7  | 0  | 0  |            |
| 7  | 0  | 716.141476 | 517.898579 | 14 | 0  | 0  |            |
| 6  | 0  | 781.772314 | 518.879535 | 14 | 0  | 1  | 2807.48645 |
| 0  | 0  |            |            | 2  | 0  | 0  |            |
| 1  | 0  | 452.426087 |            | 3  | 0  | 0  |            |
| 7  | 0  | 742.877807 | 509.622644 | 14 | 0  | 0  |            |
| 10 | 0  | 1055.15483 | 621.274428 | 23 | 0  | 1  | 2812.91469 |
| 0  | 0  |            |            | 4  | 0  | 0  |            |
| 1  | 0  | 466.513514 |            | 4  | 0  | 0  |            |
| 7  | 3  | 742.877807 | 509.622644 | 14 | 3  | 1  | 294.753507 |
| 10 | 0  | 1055.15483 | 621.274428 | 23 | 0  | 1  | 2812.91469 |
| 0  | 0  |            |            | 4  | 0  | 0  |            |
| 1  | 0  | 466.513514 |            | 4  | 0  | 0  |            |
| 5  | 3  | 1989.81221 | 863.791174 | 6  | 3  | 1  | 355.549811 |
| 3  | 2  | 2117.15745 | 2947.11677 | 30 | 11 | 6  | 166.647011 |
| 0  | 0  |            |            | 0  | 0  | 0  |            |
| 0  | 0  |            |            | 2  | 0  | 0  |            |
| 3  | 0  | 1149.69828 | 236.30884  | 3  | 0  | 0  |            |
| 5  | 0  | 2785.27006 | 2718.59774 | 13 | 0  | 0  |            |
| 1  | 0  | 1120.6     |            | 1  | 0  | 0  |            |
| 0  | 0  |            |            | 0  | 0  | 0  |            |
| 3  | 0  | 1149.69828 | 236.30884  | 3  | 0  | 0  |            |
| 5  | 2  | 2785.27006 | 2718.59774 | 13 | 2  | 1  | 617.191046 |
| 1  | 0  | 1120.6     |            | 1  | 0  | 0  |            |
| 0  | 0  |            |            | 0  | 0  | 0  |            |
| 4  | 0  | 2290.30738 | 1432.90548 | 5  | 0  | 0  |            |
| 1  | 0  | 629.315068 |            | 3  | 0  | 0  |            |
| 2  | 0  | 996.417238 | 876.385133 | 2  | 0  | 0  |            |
| 1  | 0  | 320.113636 |            | 3  | 0  | 0  |            |
| 7  | 0  | 2185.59553 | 889.458958 | 9  | 0  | 0  |            |
| 3  | 0  | 1075.07364 | 1044.84326 | 6  | 0  | 0  |            |
| 4  | 0  | 847.564351 | 544.288063 | 4  | 0  | 0  |            |

AnnotatedResults

|    |    |            |            |     |    |               |
|----|----|------------|------------|-----|----|---------------|
| 1  | 0  | 431.470588 |            | 5   | 0  | 0             |
| 7  | 0  | 2185.59553 | 889.458958 | 9   | 0  | 0             |
| 3  | 0  | 1075.07364 | 1044.84326 | 6   | 0  | 0             |
| 4  | 0  | 847.564351 | 544.288063 | 4   | 0  | 0             |
| 1  | 0  | 431.470588 |            | 5   | 0  | 0             |
| 0  | 0  |            |            | 0   | 0  | 0             |
| 0  | 0  |            |            | 0   | 0  | 0             |
| 0  | 0  |            |            | 0   | 0  | 0             |
| 1  | 0  | 374.88     |            | 1   | 0  | 0             |
| 1  | 0  | 472.828571 |            | 1   | 0  | 0             |
| 1  | 0  | 472.828571 |            | 1   | 0  | 0             |
| 15 | 13 | 1456.21788 | 915.194369 | 78  | 40 | 15 117.250014 |
| 17 | 7  | 1872.80029 | 1249.52303 | 149 | 60 | 20 87.93751   |
| 2  | 2  | 382.854285 | 58.072192  | 13  | 2  | 1 329.494252  |
| 0  | 0  |            |            | 4   | 0  | 0             |
| 3  | 2  | 3086.71339 | 2090.29784 | 6   | 2  | 1 895.117005  |
| 16 | 0  | 1526.0025  | 923.553893 | 33  | 0  | 1 1404.82887  |
| 21 | 0  | 1725.91839 | 1210.95758 | 136 | 0  | 0             |
| 2  | 0  | 382.854285 | 58.072192  | 5   | 0  | 0             |
| 0  | 0  |            |            | 2   | 0  | 0             |
| 2  | 0  | 2512.40399 | 2623.96029 | 4   | 0  | 0             |
| 16 | 0  | 1526.0025  | 923.553893 | 33  | 0  | 1 1404.82887  |
| 21 | 7  | 1725.91839 | 1210.95758 | 136 | 16 | 3 404.946808  |
| 2  | 0  | 382.854285 | 58.072192  | 5   | 0  | 0             |
| 0  | 0  |            |            | 2   | 0  | 0             |
| 2  | 0  | 2512.40399 | 2623.96029 | 4   | 0  | 0             |
| 11 | 0  | 1231.44274 | 669.892778 | 29  | 0  | 1 1480.82425  |
| 29 | 11 | 2108.14288 | 1442.27481 | 157 | 11 | 1 503.197977  |
| 2  | 0  | 583.324541 | 390.759642 | 5   | 0  | 0             |
| 0  | 0  |            |            | 4   | 0  | 0             |
| 4  | 0  | 811.123353 | 317.702716 | 8   | 0  | 0             |
| 13 | 0  | 1117.96091 | 677.345633 | 33  | 0  | 0             |
| 31 | 12 | 2071.12459 | 1431.78457 | 172 | 18 | 2 493.969966  |
| 2  | 0  | 582.926042 | 391.323205 | 6   | 0  | 0             |
| 0  | 0  |            |            | 9   | 0  | 0             |
| 4  | 0  | 959.497141 | 450.351397 | 9   | 0  | 0             |
| 13 | 0  | 1117.96091 | 677.345633 | 33  | 0  | 1 1482.99555  |
| 31 | 17 | 2071.12459 | 1431.78457 | 172 | 40 | 6 205.730349  |
| 2  | 1  | 582.926042 | 391.323205 | 6   | 1  | 1 312.12388   |
| 0  | 0  |            |            | 9   | 0  | 0             |
| 4  | 0  | 959.497141 | 450.351397 | 9   | 0  | 0             |
| 13 | 9  | 824.510783 | 441.912057 | 45  | 15 | 9 154.70488   |
| 19 | 5  | 1340.83291 | 836.257495 | 54  | 11 | 5 424.488477  |
| 1  | 0  | 647.5      |            | 11  | 0  | 1 11594.1808  |
| 1  | 0  | 383.772152 |            | 9   | 3  | 1 628.590353  |
| 3  | 0  | 517.075815 | 38.671861  | 7   | 2  | 1 10700.6922  |
| 15 | 0  | 793.312628 | 455.026393 | 24  | 0  | 0             |
| 28 | 0  | 1436.54699 | 931.604135 | 47  | 0  | 0             |
| 2  | 0  | 482.491667 | 253.980971 | 6   | 0  | 0             |
| 2  | 0  | 449.481314 | 92.926788  | 3   | 0  | 0             |
| 3  | 0  | 496.89     | 72.9174    | 6   | 0  | 0             |
| 15 | 0  | 793.312628 | 455.026393 | 24  | 0  | 0             |
| 28 | 5  | 1436.54699 | 931.604135 | 47  | 5  | 1 1273.46543  |
| 2  | 0  | 482.491667 | 253.980971 | 6   | 0  | 0             |
| 2  | 0  | 449.481314 | 92.926788  | 3   | 0  | 0             |
| 3  | 0  | 496.88985  | 72.917428  | 6   | 0  | 0             |
| 15 | 0  | 1023.44065 | 812.526918 | 31  | 0  | 0             |
| 12 | 0  | 2023.33505 | 1173.21473 | 31  | 0  | 0             |

AnnotatedResults

|    |   |            |            |     |     |     |            |
|----|---|------------|------------|-----|-----|-----|------------|
| 5  | 0 | 597.723257 | 245.562806 | 14  | 0   | 0   |            |
| 5  | 0 | 746.733006 | 612.401417 | 10  | 0   | 0   |            |
| 7  | 0 | 632.835087 | 277.293164 | 8   | 0   | 0   |            |
| 16 | 0 | 1021.56203 | 785.757264 | 34  | 0   | 0   |            |
| 20 | 0 | 1915.57088 | 1121.48853 | 44  | 0   | 0   |            |
| 5  | 0 | 589.360591 | 228.372994 | 17  | 0   | 0   |            |
| 7  | 0 | 699.762296 | 473.60758  | 18  | 0   | 0   |            |
| 7  | 0 | 636.592008 | 275.427735 | 8   | 0   | 0   |            |
| 16 | 0 | 1021.56203 | 785.757264 | 34  | 0   | 0   |            |
| 20 | 5 | 1915.57088 | 1121.48853 | 44  | 7   | 2   | 738.783653 |
| 5  | 0 | 589.360591 | 228.372994 | 17  | 0   | 0   |            |
| 7  | 0 | 699.762296 | 473.60758  | 18  | 0   | 0   |            |
| 7  | 0 | 636.592008 | 275.427735 | 8   | 0   | 0   |            |
| 2  | 0 | 630.055342 | 354.169057 | 3   | 0   | 0   |            |
| 1  | 0 | 1911.49495 |            | 3   | 0   | 0   |            |
| 6  | 2 | 674.389    | 434.205    | 16  | 6   | 5   | 359.35     |
| 0  | 0 |            |            | 0   | 0   | 0   |            |
| 6  | 0 | 578.447079 | 261.447942 | 8   | 0   | 0   |            |
| 1  | 0 | 1911.49495 |            | 3   | 0   | 0   |            |
| 8  | 0 | 716.985197 | 413.13219  | 12  | 0   | 0   |            |
| 1  | 0 | 587.957317 |            | 1   | 0   | 0   |            |
| 6  | 0 | 578.447079 | 261.447942 | 8   | 0   | 0   |            |
| 1  | 0 | 1911.49495 |            | 3   | 0   | 0   |            |
| 8  | 1 | 716.985197 | 413.13219  | 12  | 2   | 1   | 317.552121 |
| 1  | 0 | 587.957317 |            | 1   | 0   | 0   |            |
| 0  | 0 |            |            | 0   | 0   | 0   |            |
| 0  | 0 |            |            | 1   | 0   | 0   |            |
| 7  | 0 | 546.369435 | 305.280754 | 11  | 0   | 0   |            |
| 0  | 0 |            |            | 0   | 0   | 0   |            |
| 1  | 0 | 596.745763 |            | 3   | 0   | 0   |            |
| 1  | 0 | 883.084337 |            | 2   | 0   | 0   |            |
| 10 | 0 | 581.796391 | 312.46106  | 18  | 0   | 0   |            |
| 0  | 0 |            |            | 0   | 0   | 0   |            |
| 1  | 0 | 596.745763 |            | 3   | 0   | 0   |            |
| 1  | 0 | 883.084337 |            | 2   | 0   | 0   |            |
| 10 | 0 | 581.796391 | 312.46106  | 18  | 0   | 0   |            |
| 0  | 0 |            |            | 0   | 0   | 0   |            |
| 3  | 0 | 1179.21044 | 214.588158 | 35  | 22  | 30  | 85.766214  |
| 1  | 1 | 348.75     |            | 183 | 130 | 173 | 83.052093  |
| 0  | 0 |            |            | 69  | 41  | 90  | 81.966445  |
| 3  | 0 | 1176.88989 | 198.256223 | 11  | 0   | 24  | 242.099566 |
| 1  | 0 | 340.639535 |            | 2   | 0   | 51  | 391.919028 |
| 0  | 0 |            |            | 9   | 0   | 13  | 480.942187 |
| 3  | 0 | 1176.88989 | 198.256223 | 11  | 0   | 70  | 170.44678  |
| 1  | 0 | 340.639535 |            | 2   | 0   | 126 | 189.988449 |
| 0  | 0 |            |            | 9   | 0   | 28  | 204.101876 |
| 5  | 0 | 1049.00762 | 1032.67034 | 9   | 0   | 12  | 253.498873 |
| 1  | 0 | 935.666667 |            | 2   | 0   | 28  | 370.748887 |
| 2  | 0 | 373.059105 | 49.341364  | 12  | 0   | 14  | 360.435228 |
| 5  | 0 | 1055.50667 | 1045.99277 | 9   | 0   | 12  | 253.498873 |
| 1  | 0 | 935.666667 |            | 2   | 0   | 28  | 370.748887 |
| 2  | 0 | 373.059105 | 49.341364  | 13  | 0   | 21  | 410.375049 |
| 5  | 0 | 1055.50667 | 1045.99277 | 9   | 0   | 48  | 149.276638 |
| 1  | 0 | 935.666667 |            | 2   | 0   | 72  | 149.819462 |
| 2  | 0 | 373.059105 | 49.341364  | 13  | 1   | 58  | 165.561362 |
| 0  | 0 |            |            | 4   | 0   | 0   |            |
| 0  | 0 |            |            | 2   | 0   | 0   |            |
| 0  | 0 |            |            | 1   | 0   | 0   |            |



AnnotatedResults

|    |   |            |            |    |    |               |
|----|---|------------|------------|----|----|---------------|
| 0  | 0 |            |            | 3  | 0  | 0             |
| 0  | 0 |            |            | 0  | 0  | 0             |
| 0  | 0 |            |            | 2  | 0  | 0             |
| 1  | 0 | 1820.95895 |            | 1  | 0  | 0             |
| 0  | 0 |            |            | 3  | 0  | 0             |
| 0  | 0 |            |            | 0  | 0  | 0             |
| 0  | 0 |            |            | 2  | 0  | 0             |
| 1  | 0 | 1820.95895 |            | 1  | 0  | 0             |
| 0  | 0 |            |            | 3  | 0  | 0             |
| 0  | 0 |            |            | 2  | 0  | 0             |
| 0  | 0 |            |            | 0  | 0  | 0             |
| 11 | 0 | 1601.75915 | 804.851297 | 14 | 0  | 0             |
| 0  | 0 |            |            | 2  | 0  | 0             |
| 0  | 0 |            |            | 2  | 0  | 0             |
| 0  | 0 |            |            | 2  | 0  | 0             |
| 17 | 0 | 1545.73661 | 786.046477 | 21 | 0  | 0             |
| 0  | 0 |            |            | 3  | 0  | 0             |
| 0  | 0 |            |            | 2  | 0  | 0             |
| 0  | 0 |            |            | 2  | 0  | 0             |
| 17 | 0 | 1545.73661 | 786.046477 | 21 | 0  | 1 701.871611  |
| 0  | 0 |            |            | 3  | 0  | 0             |
| 1  | 0 | 490.098453 |            | 37 | 9  | 6 291.496563  |
| 0  | 0 |            |            | 36 | 11 | 13 92.280104  |
| 0  | 0 |            |            | 39 | 9  | 10 157.961824 |
| 0  | 0 |            |            | 55 | 9  | 26 103.136586 |
| 2  | 0 | 411.052817 | 111.090459 | 8  | 0  | 0             |
| 0  | 0 |            |            | 5  | 0  | 0             |
| 0  | 0 |            |            | 5  | 0  | 0             |
| 0  | 0 |            |            | 6  | 0  | 0             |
| 2  | 0 | 411.052817 | 111.090459 | 8  | 0  | 2 344.150504  |
| 0  | 0 |            |            | 5  | 0  | 0             |
| 0  | 0 |            |            | 5  | 0  | 1 416.888939  |
| 0  | 0 |            |            | 6  | 2  | 2 226.357666  |
| 0  | 0 |            |            | 5  | 0  | 0             |
| 0  | 0 |            |            | 4  | 0  | 0             |
| 3  | 0 | 496.417244 | 127.055714 | 4  | 0  | 0             |
| 0  | 0 |            |            | 5  | 0  | 0             |
| 0  | 0 |            |            | 6  | 0  | 0             |
| 0  | 0 |            |            | 5  | 0  | 0             |
| 4  | 0 | 686.795325 | 392.514049 | 6  | 0  | 0             |
| 0  | 0 |            |            | 5  | 0  | 0             |
| 0  | 0 |            |            | 6  | 0  | 0             |
| 0  | 0 |            |            | 5  | 0  | 2 223.100721  |
| 4  | 0 | 686.795325 | 392.514049 | 6  | 0  | 0             |
| 0  | 0 |            |            | 5  | 0  | 0             |
| 0  | 0 |            |            | 3  | 1  | 1 252.956049  |
| 2  | 0 | 738.991108 | 330.332457 | 5  | 0  | 0             |
| 5  | 3 | 724.241982 | 347.894236 | 14 | 5  | 3 109.650476  |
| 0  | 0 |            |            | 0  | 0  | 0             |
| 0  | 0 |            |            | 2  | 0  | 0             |
| 3  | 0 | 760.995244 | 429.968568 | 3  | 0  | 0             |
| 8  | 0 | 711.41238  | 315.503637 | 13 | 0  | 0             |
| 0  | 0 |            |            | 0  | 0  | 0             |
| 0  | 0 |            |            | 2  | 0  | 0             |
| 3  | 0 | 760.995244 | 429.968568 | 3  | 0  | 0             |
| 8  | 0 | 711.41238  | 315.503637 | 13 | 0  | 0             |
| 0  | 0 |            |            | 0  | 0  | 0             |
| 0  | 0 |            |            | 4  | 0  | 0             |

AnnotatedResults

|     |     |            |            |     |     |               |
|-----|-----|------------|------------|-----|-----|---------------|
| 6   | 0   | 1111.25584 | 604.86861  | 10  | 0   | 0             |
| 1   | 0   | 535.275862 |            | 6   | 0   | 0             |
| 0   | 0   |            |            | 1   | 0   | 0             |
| 2   | 0   | 749.019706 | 376.419055 | 8   | 0   | 0             |
| 7   | 0   | 1039.97952 | 603.492417 | 9   | 0   | 0             |
| 2   | 0   | 421.204667 | 136.087885 | 12  | 0   | 0             |
| 1   | 0   | 445.565217 |            | 2   | 0   | 0             |
| 2   | 0   | 749.019706 | 376.419055 | 8   | 0   | 0             |
| 7   | 0   | 1039.97952 | 603.492417 | 9   | 0   | 0             |
| 2   | 0   | 421.204667 | 136.087885 | 12  | 0   | 1 1446.62633  |
| 1   | 0   | 445.565217 |            | 2   | 0   | 0             |
| 175 | 149 | 1658.01823 | 870.933137 | 294 | 204 | 49 88.480335  |
| 71  | 42  | 1022.04792 | 602.990826 | 130 | 52  | 25 89.023159  |
| 19  | 5   | 473.721812 | 154.66761  | 81  | 40  | 21 138.420155 |
| 187 | 102 | 1625.61201 | 861.822065 | 239 | 121 | 10 388.119259 |
| 74  | 10  | 1013.63724 | 592.786321 | 91  | 12  | 1 787.095001  |
| 20  | 2   | 464.201729 | 149.253379 | 48  | 10  | 3 309.409759  |
| 187 | 123 | 1625.61201 | 861.822065 | 239 | 144 | 14 330.579901 |
| 74  | 22  | 1013.63724 | 592.786321 | 91  | 24  | 5 394.090325  |
| 20  | 3   | 464.201729 | 149.253379 | 48  | 16  | 7 193.245393  |
| 234 | 124 | 2077.77512 | 1230.47553 | 293 | 145 | 10 372.920183 |
| 69  | 11  | 1236.22522 | 741.529902 | 84  | 12  | 1 870.147094  |
| 18  | 2   | 549.610916 | 249.398014 | 41  | 5   | 1 347.950273  |
| 246 | 140 | 2065.63167 | 1231.50996 | 311 | 163 | 11 375.634304 |
| 80  | 10  | 1149.65444 | 762.915005 | 97  | 10  | 1 754.525553  |
| 25  | 2   | 548.503682 | 236.433916 | 53  | 5   | 1 351.750042  |
| 246 | 182 | 2065.63167 | 1231.50996 | 311 | 211 | 22 230.157435 |
| 80  | 24  | 1149.65444 | 762.915005 | 97  | 24  | 4 464.657463  |
| 25  | 7   | 548.503682 | 236.433916 | 53  | 14  | 5 168.818307  |
| 14  | 6   | 1262.23606 | 533.713762 | 57  | 16  | 8 137.334507  |
| 75  | 65  | 1160.20162 | 742.48769  | 129 | 80  | 16 83.594917  |
| 52  | 34  | 1272.22672 | 767.328598 | 112 | 50  | 15 121.049783 |
| 55  | 41  | 1281.0641  | 704.165789 | 146 | 73  | 24 83.594917  |
| 3   | 0   | 529.638428 | 130.381106 | 18  | 3   | 5 307.781287  |
| 24  | 6   | 1050.55593 | 567.296681 | 36  | 10  | 1 531.424832  |
| 84  | 67  | 1263.26094 | 813.959223 | 100 | 68  | 4 362.606525  |
| 48  | 10  | 1333.62769 | 786.4522   | 70  | 10  | 1 787.637825  |
| 60  | 0   | 1290.7888  | 704.117734 | 93  | 0   | 1 555.309094  |
| 4   | 0   | 536.161252 | 190.493446 | 8   | 0   | 0             |
| 24  | 6   | 1050.55593 | 567.296681 | 36  | 10  | 1 531.424832  |
| 84  | 67  | 1263.26094 | 813.959223 | 100 | 68  | 4 362.606525  |
| 48  | 22  | 1333.62769 | 786.4522   | 70  | 25  | 3 288.239618  |
| 60  | 27  | 1290.7888  | 704.117734 | 93  | 33  | 8 312.666704  |
| 4   | 0   | 536.161252 | 190.493446 | 8   | 0   | 0             |
| 30  | 0   | 1642.63351 | 993.85646  | 38  | 0   | 0             |
| 72  | 55  | 1833.19982 | 1330.31224 | 88  | 56  | 3 382.148194  |
| 76  | 15  | 1657.62963 | 938.534013 | 101 | 15  | 1 699.157491  |
| 64  | 10  | 1595.67573 | 1033.07793 | 94  | 10  | 1 328.408604  |
| 2   | 0   | 421.844131 | 129.400726 | 6   | 0   | 0             |
| 29  | 0   | 1633.6624  | 989.435519 | 40  | 0   | 0             |
| 72  | 56  | 1841.75757 | 1348.28819 | 94  | 57  | 3 381.062545  |
| 88  | 22  | 1602.63753 | 940.222575 | 118 | 22  | 1 1221.89714  |
| 66  | 13  | 1590.4585  | 1024.95378 | 105 | 13  | 4 326.237307  |
| 3   | 0   | 511.249573 | 114.673571 | 8   | 0   | 0             |
| 29  | 13  | 1633.6624  | 989.435519 | 40  | 15  | 2 520.568349  |
| 72  | 56  | 1841.75757 | 1348.28819 | 94  | 57  | 5 208.987293  |
| 88  | 45  | 1602.63753 | 940.222575 | 118 | 46  | 5 300.181749  |
| 66  | 26  | 1590.4585  | 1024.95378 | 105 | 27  | 9 233.41438   |

AnnotatedResults

|     |     |            |            |     |     |               |
|-----|-----|------------|------------|-----|-----|---------------|
| 3   | 0   | 511.249573 | 114.673571 | 8   | 0   | 0             |
| 101 | 84  | 1596.50909 | 850.028256 | 199 | 130 | 27 110.736124 |
| 3   | 0   | 1051.23515 | 697.970186 | 17  | 0   | 3 129.734969  |
| 2   | 0   | 551.049107 | 303.595034 | 25  | 4   | 7 164.475714  |
| 19  | 14  | 1375.15185 | 894.528291 | 63  | 36  | 14 132.44909  |
| 106 | 54  | 1585.46753 | 836.22725  | 145 | 61  | 3 643.246604  |
| 3   | 0   | 1076.85257 | 677.330549 | 7   | 0   | 0             |
| 2   | 0   | 600.353781 | 358.077249 | 7   | 0   | 0             |
| 19  | 0   | 1383.79712 | 885.808021 | 23  | 0   | 0             |
| 106 | 75  | 1585.46753 | 836.22725  | 145 | 82  | 7 366.949118  |
| 3   | 0   | 1076.85257 | 677.330549 | 7   | 0   | 0             |
| 2   | 0   | 600.353781 | 358.077249 | 7   | 0   | 0             |
| 19  | 0   | 1383.79712 | 885.808021 | 23  | 1   | 1 271.954894  |
| 119 | 75  | 1818.84553 | 965.953625 | 152 | 83  | 5 414.717642  |
| 4   | 0   | 785.446925 | 304.865923 | 11  | 0   | 0             |
| 3   | 0   | 771.539139 | 379.696295 | 12  | 0   | 0             |
| 23  | 0   | 1880.25012 | 1380.05789 | 40  | 0   | 0             |
| 126 | 80  | 1793.10497 | 961.153676 | 158 | 87  | 5 414.717642  |
| 4   | 0   | 783.381559 | 307.040729 | 11  | 0   | 0             |
| 3   | 0   | 771.539139 | 379.696295 | 11  | 0   | 0             |
| 23  | 0   | 1881.93784 | 1374.40162 | 41  | 0   | 0             |
| 126 | 86  | 1793.10497 | 961.153676 | 158 | 95  | 10 208.987293 |
| 4   | 0   | 783.381559 | 307.040729 | 11  | 0   | 1 415.260466  |
| 3   | 0   | 771.539139 | 379.696295 | 11  | 0   | 0             |
| 23  | 6   | 1881.93784 | 1374.40162 | 41  | 7   | 4 210.072942  |
| 3   | 2   | 811.281029 | 171.577793 | 38  | 13  | 14 97.165521  |
| 8   | 3   | 546.51224  | 166.770184 | 50  | 15  | 19 85.766214  |
| 7   | 3   | 425.213594 | 138.451431 | 43  | 15  | 15 658.988504 |
| 165 | 149 | 1448.10682 | 834.52098  | 303 | 231 | 28 92.280104  |
| 4   | 0   | 724.307278 | 208.555223 | 14  | 0   | 0             |
| 8   | 0   | 529.470337 | 159.240305 | 27  | 0   | 0             |
| 7   | 0   | 408.494944 | 143.240787 | 16  | 0   | 0             |
| 177 | 159 | 1419.97804 | 819.17208  | 266 | 222 | 9 522.739646  |
| 4   | 0   | 724.307278 | 208.555223 | 14  | 0   | 0             |
| 8   | 0   | 529.470337 | 159.240305 | 27  | 0   | 0             |
| 7   | 1   | 408.494944 | 143.240787 | 16  | 2   | 2 499.941032  |
| 177 | 159 | 1419.97804 | 819.17208  | 266 | 222 | 13 319.180594 |
| 9   | 0   | 794.620322 | 728.730423 | 15  | 0   | 0             |
| 9   | 0   | 940.427014 | 698.590146 | 29  | 0   | 0             |
| 4   | 0   | 488.54313  | 199.802975 | 22  | 0   | 0             |
| 192 | 170 | 1866.67582 | 1085.59378 | 265 | 215 | 9 616.105397  |
| 7   | 0   | 604.007518 | 174.374159 | 16  | 0   | 0             |
| 9   | 0   | 863.979752 | 728.69109  | 36  | 0   | 0             |
| 6   | 0   | 531.961851 | 264.9116   | 28  | 0   | 0             |
| 195 | 183 | 1876.06763 | 1090.03058 | 276 | 233 | 10 349.035921 |
| 7   | 0   | 604.007518 | 174.374159 | 16  | 0   | 0             |
| 9   | 0   | 863.979752 | 728.69109  | 36  | 0   | 0             |
| 6   | 0   | 531.961851 | 264.9116   | 28  | 3   | 3 472.799825  |
| 195 | 187 | 1876.06763 | 1090.03058 | 276 | 238 | 17 231.243083 |
| 6   | 3   | 1339.60101 | 763.615915 | 30  | 4   | 4 161.218769  |
| 3   | 0   | 525.709067 | 27.494121  | 16  | 0   | 0             |
| 1   | 1   | 392.2      |            | 15  | 1   | 3 144.391221  |
| 4   | 0   | 779.862176 | 269.562294 | 17  | 0   | 0             |
| 7   | 0   | 1340.99021 | 681.957027 | 10  | 0   | 0             |
| 5   | 0   | 682.065422 | 403.894854 | 10  | 0   | 0             |
| 1   | 0   | 305.418    |            | 7   | 0   | 0             |
| 1   | 0   | 679.167286 |            | 5   | 0   | 0             |
| 7   | 0   | 1340.99021 | 681.957027 | 10  | 0   | 0             |

AnnotatedResults

|     |     |            |            |     |     |               |
|-----|-----|------------|------------|-----|-----|---------------|
| 5   | 0   | 682.065422 | 403.894854 | 10  | 0   | 0             |
| 1   | 0   | 305.418182 |            | 7   | 0   | 0             |
| 1   | 0   | 679.167286 |            | 5   | 0   | 0             |
| 12  | 0   | 1843.90907 | 1256.70613 | 15  | 0   | 0             |
| 8   | 0   | 672.744715 | 427.155299 | 14  | 0   | 0             |
| 4   | 0   | 756.045208 | 621.993072 | 8   | 0   | 0             |
| 5   | 0   | 585.750099 | 249.838524 | 18  | 0   | 0             |
| 12  | 0   | 1741.08864 | 1316.46492 | 15  | 0   | 0             |
| 8   | 0   | 613.4623   | 370.681829 | 15  | 0   | 0             |
| 4   | 0   | 756.045208 | 621.993072 | 10  | 0   | 0             |
| 8   | 0   | 577.872568 | 240.068454 | 36  | 0   | 0             |
| 12  | 6   | 1741.08864 | 1316.46492 | 15  | 6   | 1 461.943342  |
| 8   | 5   | 613.4623   | 370.681829 | 15  | 5   | 1 312.12388   |
| 4   | 0   | 756.045208 | 621.993072 | 10  | 0   | 0             |
| 8   | 0   | 577.872568 | 240.068454 | 36  | 0   | 0             |
| 41  | 28  | 1963.36993 | 1169.79911 | 97  | 43  | 12 143.848397 |
| 9   | 5   | 1305.95087 | 409.795096 | 36  | 9   | 5 264.355356  |
| 0   | 0   |            |            | 6   | 0   | 1 6626.79709  |
| 8   | 1   | 679.683792 | 330.641511 | 36  | 19  | 3 609.048684  |
| 42  | 17  | 2003.10084 | 1179.49474 | 72  | 17  | 1 679.615822  |
| 19  | 0   | 1612.29574 | 844.770586 | 27  | 0   | 0             |
| 0   | 0   |            |            | 3   | 0   | 0             |
| 8   | 1   | 624.602954 | 258.600902 | 26  | 16  | 1 637.818363  |
| 42  | 19  | 2003.10084 | 1179.49474 | 72  | 22  | 3 441.858849  |
| 19  | 6   | 1612.29574 | 844.770586 | 27  | 6   | 1 377.805601  |
| 0   | 0   |            |            | 3   | 0   | 0             |
| 8   | 1   | 624.602954 | 258.600902 | 26  | 16  | 1 637.818363  |
| 14  | 0   | 1936.51702 | 1066.37607 | 20  | 0   | 0             |
| 0   | 0   |            |            | 2   | 0   | 0             |
| 9   | 2   | 748.779358 | 555.133618 | 23  | 11  | 1 434.802135  |
| 16  | 0   | 1959.10019 | 931.896033 | 24  | 0   | 0             |
| 0   | 0   |            |            | 6   | 0   | 0             |
| 9   | 2   | 733.05255  | 491.876956 | 24  | 12  | 1 427.745421  |
| 16  | 0   | 1959.10019 | 931.896033 | 24  | 0   | 0             |
| 0   | 0   |            |            | 6   | 0   | 0             |
| 9   | 2   | 733.05255  | 491.876956 | 24  | 12  | 1 427.745421  |
| 68  | 38  | 541.674973 | 279.481298 | 93  | 46  | 30 128.649321 |
| 66  | 39  | 666.271    | 350.53     | 80  | 41  | 11 210.616    |
| 147 | 110 | 787.752914 | 418.269144 | 188 | 117 | 23 128.106497 |
| 73  | 8   | 532.369254 | 275.812334 | 79  | 8   | 1 434.802135  |
| 71  | 31  | 641.996019 | 340.815064 | 75  | 31  | 3 843.005887  |
| 152 | 92  | 764.004305 | 410.03723  | 161 | 92  | 5 414.174818  |
| 73  | 23  | 532.369254 | 275.812334 | 79  | 23  | 4 195.959514  |
| 71  | 32  | 641.996019 | 340.815064 | 75  | 32  | 5 144.934045  |
| 152 | 101 | 764.004305 | 410.03723  | 161 | 101 | 7 233.957204  |
| 90  | 11  | 627.114984 | 357.02548  | 93  | 11  | 1 463.02899   |
| 95  | 38  | 738.286937 | 414.713108 | 100 | 38  | 3 606.334563  |
| 147 | 93  | 853.060331 | 490.754934 | 150 | 93  | 5 298.010452  |
| 93  | 11  | 626.146356 | 361.318514 | 98  | 11  | 1 462.486166  |
| 128 | 42  | 705.883374 | 411.495376 | 135 | 42  | 3 725.755874  |
| 170 | 91  | 824.215821 | 476.103748 | 174 | 91  | 4 310.495407  |
| 93  | 27  | 626.146356 | 361.318514 | 98  | 27  | 4 185.103031  |
| 128 | 45  | 705.883374 | 411.495376 | 135 | 45  | 5 169.903955  |
| 170 | 108 | 824.215821 | 476.103748 | 174 | 108 | 7 223.100721  |
| 3   | 0   | 749.441501 | 575.633343 | 24  | 6   | 9 94.994224   |

AnnotatedResults

|    |    |            |            |     |    |    |            |
|----|----|------------|------------|-----|----|----|------------|
| 5  | 2  | 1324.15    | 499.477    | 34  | 12 | 9  | 166.647    |
| 3  | 3  | 4351.80412 | 953.282902 | 4   | 3  | 1  | 438.601904 |
| 2  | 0  | 761.251894 | 518.60122  | 21  | 3  | 4  | 85.22339   |
| 3  | 0  | 957.398947 | 824.504356 | 8   | 0  | 0  |            |
| 8  | 0  | 1121.43073 | 492.069407 | 19  | 0  | 0  |            |
| 3  | 0  | 4240.39867 | 913.466598 | 4   | 0  | 0  |            |
| 2  | 0  | 761.251894 | 518.60122  | 6   | 0  | 0  |            |
| 3  | 0  | 957.398947 | 824.504356 | 8   | 0  | 1  | 620.990815 |
| 8  | 0  | 1121.43073 | 492.069407 | 19  | 0  | 0  |            |
| 3  | 0  | 4240.39867 | 913.466598 | 4   | 0  | 0  |            |
| 2  | 0  | 761.251894 | 518.60122  | 6   | 0  | 0  |            |
| 5  | 0  | 681.571705 | 578.456362 | 13  | 0  | 1  | 622.619287 |
| 3  | 0  | 1794.86708 | 1090.28716 | 12  | 0  | 0  |            |
| 0  | 0  |            |            | 0   | 0  | 0  |            |
| 1  | 0  | 1081.43046 |            | 7   | 0  | 0  |            |
| 11 | 1  | 525.646089 | 397.998476 | 21  | 1  | 1  | 604.163266 |
| 5  | 0  | 1672.39715 | 856.469466 | 17  | 0  | 0  |            |
| 0  | 0  |            |            | 1   | 0  | 0  |            |
| 1  | 0  | 1081.43046 |            | 9   | 0  | 0  |            |
| 11 | 1  | 525.646089 | 397.998476 | 21  | 2  | 2  | 394.633149 |
| 5  | 0  | 1672.39715 | 856.469466 | 17  | 0  | 0  |            |
| 0  | 0  |            |            | 1   | 0  | 0  |            |
| 1  | 0  | 1081.43046 |            | 9   | 0  | 0  |            |
| 28 | 24 | 888.88951  | 654.567199 | 120 | 52 | 23 | 122.135431 |
| 18 | 15 | 493.20469  | 182.036429 | 48  | 26 | 10 | 116.70719  |
| 13 | 2  | 846.913476 | 545.93404  | 73  | 17 | 13 | 152.533583 |
| 3  | 0  | 802.138087 | 275.411489 | 7   | 0  | 0  |            |
| 0  | 0  |            |            | 10  | 0  | 1  | 12381.2758 |
| 28 | 0  | 796.563123 | 530.54017  | 50  | 0  | 0  |            |
| 16 | 14 | 530.495035 | 200.85258  | 23  | 14 | 1  | 1192.04181 |
| 17 | 0  | 797.359201 | 519.819357 | 31  | 0  | 0  |            |
| 3  | 0  | 897.760911 | 358.411894 | 4   | 0  | 0  |            |
| 2  | 0  | 685.900099 | 117.254394 | 4   | 0  | 0  |            |
| 28 | 15 | 796.563123 | 530.54017  | 50  | 17 | 5  | 180.217614 |
| 16 | 14 | 530.495035 | 200.85258  | 23  | 14 | 2  | 272.497718 |
| 17 | 0  | 797.359201 | 519.819357 | 31  | 0  | 0  |            |
| 3  | 0  | 897.760911 | 358.411894 | 4   | 0  | 0  |            |
| 2  | 0  | 685.900099 | 117.254394 | 4   | 0  | 0  |            |
| 35 | 0  | 1007.63039 | 721.47331  | 68  | 0  | 0  |            |
| 29 | 19 | 553.384491 | 283.20493  | 41  | 19 | 1  | 1431.42725 |
| 19 | 0  | 999.816384 | 546.496203 | 34  | 0  | 0  |            |
| 7  | 0  | 819.19064  | 523.733757 | 11  | 0  | 0  |            |
| 2  | 0  | 565.687418 | 316.745841 | 8   | 0  | 0  |            |
| 39 | 0  | 918.927421 | 687.949187 | 73  | 0  | 0  |            |
| 28 | 20 | 572.894304 | 295.856892 | 43  | 20 | 1  | 1423.82772 |
| 20 | 0  | 969.762141 | 549.053635 | 37  | 0  | 0  |            |
| 8  | 0  | 766.185111 | 507.535074 | 13  | 0  | 0  |            |
| 2  | 0  | 565.687418 | 316.745841 | 14  | 0  | 0  |            |
| 39 | 17 | 918.927421 | 687.949187 | 73  | 18 | 5  | 192.159745 |
| 28 | 22 | 572.894304 | 295.856892 | 43  | 22 | 2  | 221.472249 |
| 20 | 2  | 969.762141 | 549.053635 | 37  | 2  | 1  | 247.527807 |
| 8  | 0  | 766.185111 | 507.535074 | 13  | 2  | 1  | 205.730349 |
| 2  | 0  | 565.687418 | 316.745841 | 14  | 0  | 0  |            |
| 0  | 0  |            |            | 0   | 0  | 0  |            |
| 2  | 2  | 2646.24726 | 47.795547  | 3   | 2  | 1  | 437.516256 |
| 0  | 0  |            |            | 0   | 0  | 0  |            |
| 1  | 0  | 2079.66316 |            | 4   | 0  | 0  |            |
| 1  | 0  | 3760.74314 |            | 9   | 0  | 1  | 5835.90232 |

AnnotatedResults

|    |   |            |            |    |    |              |
|----|---|------------|------------|----|----|--------------|
| 0  | 0 |            |            | 0  | 0  | 0            |
| 7  | 0 | 2200.52175 | 712.821499 | 7  | 0  | 0            |
| 0  | 0 |            |            | 0  | 0  | 0            |
| 5  | 0 | 1667.05274 | 369.789806 | 5  | 0  | 0            |
| 2  | 0 | 2141.03824 | 2290.60864 | 7  | 0  | 0            |
| 0  | 0 |            |            | 0  | 0  | 0            |
| 7  | 0 | 2200.52175 | 712.821499 | 7  | 0  | 0            |
| 0  | 0 |            |            | 0  | 0  | 0            |
| 5  | 0 | 1667.05274 | 369.789806 | 5  | 0  | 0            |
| 2  | 0 | 2141.03824 | 2290.60864 | 7  | 0  | 0            |
| 0  | 0 |            |            | 1  | 0  | 0            |
| 3  | 0 | 3022.53716 | 1521.22334 | 3  | 0  | 0            |
| 0  | 0 |            |            | 2  | 0  | 0            |
| 10 | 0 | 1750.89669 | 748.643202 | 15 | 0  | 0            |
| 1  | 0 | 3611.60901 |            | 4  | 0  | 0            |
| 0  | 0 |            |            | 3  | 0  | 0            |
| 3  | 0 | 2971.3292  | 1386.14337 | 3  | 0  | 0            |
| 0  | 0 |            |            | 2  | 0  | 0            |
| 17 | 0 | 1454.76408 | 736.880755 | 23 | 0  | 0            |
| 2  | 0 | 2012.99201 | 2260.78585 | 11 | 0  | 0            |
| 0  | 0 |            |            | 3  | 0  | 0            |
| 3  | 0 | 2971.3292  | 1386.14337 | 3  | 0  | 0            |
| 0  | 0 |            |            | 2  | 0  | 0            |
| 17 | 6 | 1454.76408 | 736.880755 | 23 | 6  | 1 395.718797 |
| 2  | 0 | 2012.99201 | 2260.78585 | 11 | 0  | 0            |
| 0  | 0 |            |            | 0  | 0  | 0            |
| 10 | 2 | 977.471699 | 454.537919 | 32 | 11 | 6 211.701414 |
| 0  | 0 |            |            | 0  | 0  | 0            |
| 0  | 0 |            |            | 1  | 0  | 0            |
| 0  | 0 |            |            | 0  | 0  | 0            |
| 9  | 0 | 958.307446 | 535.746595 | 12 | 0  | 0            |
| 0  | 0 |            |            | 0  | 0  | 0            |
| 0  | 0 |            |            | 1  | 0  | 0            |
| 0  | 0 |            |            | 0  | 0  | 0            |
| 9  | 0 | 958.307446 | 535.746595 | 12 | 0  | 0            |
| 0  | 0 |            |            | 0  | 0  | 0            |
| 0  | 0 |            |            | 1  | 0  | 0            |
| 0  | 0 |            |            | 2  | 0  | 0            |
| 14 | 0 | 1396.00197 | 763.62212  | 25 | 0  | 0            |
| 0  | 0 |            |            | 1  | 0  | 0            |
| 0  | 0 |            |            | 1  | 0  | 0            |
| 0  | 0 |            |            | 3  | 0  | 0            |
| 18 | 0 | 1286.43072 | 644.774127 | 30 | 0  | 0            |
| 0  | 0 |            |            | 1  | 0  | 0            |
| 0  | 0 |            |            | 1  | 0  | 0            |
| 0  | 0 |            |            | 3  | 0  | 0            |
| 18 | 4 | 1286.43072 | 644.774127 | 30 | 4  | 1 326.237307 |
| 0  | 0 |            |            | 1  | 0  | 0            |
| 0  | 0 |            |            | 1  | 0  | 0            |
| 0  | 0 |            |            | 0  | 0  | 0            |
| 0  | 0 |            |            | 1  | 0  | 0            |
| 0  | 0 |            |            | 0  | 0  | 0            |
| 0  | 0 |            |            | 0  | 0  | 0            |
| 0  | 0 |            |            | 1  | 0  | 0            |
| 0  | 0 |            |            | 1  | 0  | 0            |
| 0  | 0 |            |            | 0  | 0  | 0            |
| 0  | 0 |            |            | 0  | 0  | 0            |
| 0  | 0 |            |            | 1  | 0  | 0            |
| 0  | 0 |            |            | 1  | 0  | 0            |
| 0  | 0 |            |            | 0  | 0  | 0            |
| 0  | 0 |            |            | 0  | 0  | 0            |
| 0  | 0 |            |            | 1  | 0  | 0            |

AnnotatedResults

|    |    |            |            |    |    |               |
|----|----|------------|------------|----|----|---------------|
| 0  | 0  |            |            | 1  | 0  | 0             |
| 0  | 0  |            |            | 0  | 0  | 0             |
| 0  | 0  |            |            | 0  | 0  | 0             |
| 0  | 0  |            |            | 2  | 0  | 0             |
| 0  | 0  |            |            | 2  | 0  | 0             |
| 0  | 0  |            |            | 2  | 0  | 0             |
| 0  | 0  |            |            | 0  | 0  | 0             |
| 0  | 0  |            |            | 3  | 0  | 0             |
| 0  | 0  |            |            | 2  | 0  | 0             |
| 0  | 0  |            |            | 6  | 0  | 0             |
| 0  | 0  |            |            | 0  | 0  | 0             |
| 0  | 0  |            |            | 3  | 0  | 0             |
| 0  | 0  |            |            | 2  | 0  | 0             |
| 0  | 0  |            |            | 6  | 0  | 0             |
| 0  | 0  |            |            | 0  | 0  | 0             |
| 2  | 0  | 1100.28244 | 175.534629 | 16 | 0  | 3 119.421311  |
| 5  | 1  | 812.838586 | 659.191556 | 19 | 4  | 3 98.793993   |
| 26 | 15 | 1290.82066 | 844.406572 | 49 | 25 | 7 85.22339    |
| 1  | 1  | 644.571429 |            | 10 | 4  | 4 6556.77277  |
| 28 | 19 | 588.201316 | 230.294226 | 60 | 30 | 20 178.589142 |
| 2  | 0  | 571.50997  | 204.974342 | 5  | 0  | 0             |
| 4  | 0  | 932.955995 | 687.710951 | 7  | 0  | 0             |
| 25 | 13 | 1346.21584 | 826.779616 | 33 | 13 | 1 451.629683  |
| 1  | 0  | 323.848101 |            | 1  | 0  | 0             |
| 28 | 0  | 587.684467 | 227.231606 | 35 | 0  | 0             |
| 2  | 0  | 571.50997  | 204.974342 | 5  | 0  | 0             |
| 4  | 0  | 932.955995 | 687.710951 | 7  | 0  | 0             |
| 25 | 17 | 1346.21584 | 826.779616 | 33 | 17 | 2 398.432918  |
| 1  | 0  | 323.848101 |            | 1  | 0  | 1 200.844931  |
| 28 | 15 | 587.684467 | 227.231606 | 35 | 17 | 7 151.990759  |
| 0  | 0  |            |            | 4  | 0  | 0             |
| 6  | 0  | 811.577519 | 687.946369 | 11 | 0  | 0             |
| 26 | 0  | 1591.40282 | 1049.92324 | 31 | 0  | 0             |
| 6  | 0  | 390.965193 | 144.949056 | 9  | 0  | 0             |
| 43 | 17 | 646.134201 | 305.380586 | 47 | 18 | 3 296.924804  |
| 1  | 0  | 694.156863 |            | 7  | 0  | 0             |
| 8  | 0  | 801.303541 | 624.047069 | 14 | 0  | 0             |
| 29 | 11 | 1471.03633 | 1012.25327 | 36 | 11 | 1 446.201442  |
| 7  | 0  | 490.701825 | 242.662836 | 10 | 0  | 0             |
| 44 | 22 | 620.185907 | 296.530853 | 47 | 23 | 3 324.608835  |
| 1  | 0  | 694.156863 |            | 7  | 0  | 0             |
| 8  | 0  | 801.303541 | 624.047069 | 14 | 0  | 0             |
| 29 | 11 | 1471.03633 | 1012.25327 | 36 | 11 | 1 446.201442  |
| 7  | 0  | 490.701825 | 242.662836 | 10 | 1  | 1 168.275483  |
| 44 | 27 | 620.185907 | 296.530853 | 47 | 28 | 5 148.19099   |
| 0  | 0  |            |            | 44 | 16 | 13 112.364597 |
| 13 | 2  | 681.381265 | 354.501416 | 47 | 13 | 12 183.474559 |
| 9  | 7  | 1042.36303 | 353.405954 | 80 | 24 | 10 296.38198  |
| 15 | 5  | 1420.91405 | 801.547677 | 74 | 28 | 12 109.107652 |
| 0  | 0  |            |            | 19 | 0  | 0             |
| 14 | 0  | 667.324593 | 348.94898  | 28 | 0  | 0             |
| 8  | 0  | 982.315921 | 356.905898 | 32 | 7  | 1 2028.53381  |
| 23 | 4  | 1242.51603 | 742.127893 | 60 | 15 | 1 6499.77624  |
| 0  | 0  |            |            | 19 | 0  | 0             |
| 14 | 0  | 667.324593 | 348.94898  | 28 | 1  | 1 446.744266  |
| 8  | 6  | 982.315921 | 356.905898 | 32 | 14 | 3 283.3542    |
| 23 | 4  | 1242.51603 | 742.127893 | 60 | 15 | 2 823.464218  |
| 1  | 0  | 825.347826 |            | 23 | 0  | 0             |

AnnotatedResults

|    |    |            |            |     |    |               |
|----|----|------------|------------|-----|----|---------------|
| 21 | 0  | 731.399549 | 349.52312  | 34  | 0  | 0             |
| 18 | 1  | 1120.19314 | 621.273687 | 41  | 10 | 2 728.469994  |
| 25 | 2  | 1787.16815 | 860.010785 | 57  | 11 | 2 1465.62518  |
| 2  | 0  | 599.043031 | 320.043311 | 22  | 0  | 0             |
| 22 | 0  | 719.38068  | 346.510561 | 35  | 0  | 0             |
| 18 | 1  | 1123.4395  | 638.436257 | 46  | 10 | 2 610.134332  |
| 29 | 3  | 1603.71492 | 932.76608  | 62  | 10 | 1 4446.27252  |
| 2  | 0  | 599.043031 | 320.043311 | 22  | 0  | 0             |
| 22 | 6  | 719.38068  | 346.510561 | 35  | 8  | 2 180.760438  |
| 18 | 12 | 1123.4395  | 638.436257 | 46  | 21 | 5 142.762748  |
| 29 | 10 | 1603.71492 | 932.76608  | 62  | 18 | 4 357.721107  |
| 0  | 0  |            |            | 27  | 14 | 5 92.280104   |
| 37 | 28 | 1524.17436 | 1012.98431 | 106 | 51 | 15 136.791683 |
| 6  | 4  | 1199.64    | 436.078    | 84  | 16 | 7 110.193     |
| 20 | 15 | 1462.76619 | 797.319945 | 100 | 34 | 13 140.048628 |
| 1  | 0  | 365.022388 |            | 13  | 2  | 5 201.387755  |
| 0  | 0  |            |            | 11  | 0  | 0             |
| 37 | 10 | 1640.00822 | 998.196622 | 52  | 10 | 2 500.483856  |
| 10 | 0  | 992.282522 | 474.785087 | 42  | 0  | 1 1566.04764  |
| 20 | 0  | 1548.74659 | 820.565079 | 60  | 0  | 0             |
| 1  | 0  | 516.085202 |            | 4   | 0  | 0             |
| 0  | 0  |            |            | 11  | 0  | 0             |
| 37 | 18 | 1640.00822 | 998.196622 | 52  | 18 | 3 357.178283  |
| 10 | 0  | 992.282522 | 474.785087 | 42  | 0  | 1 1566.04764  |
| 20 | 0  | 1548.74659 | 820.565079 | 60  | 0  | 0             |
| 1  | 0  | 516.085202 |            | 4   | 0  | 0             |
| 0  | 0  |            |            | 9   | 0  | 0             |
| 43 | 14 | 2061.86704 | 1290.4607  | 61  | 14 | 1 496.141263  |
| 19 | 0  | 1022.85154 | 536.265305 | 59  | 0  | 1 1453.68304  |
| 22 | 6  | 1955.59597 | 1126.79263 | 61  | 7  | 1 1203.98394  |
| 1  | 0  | 344.87395  |            | 5   | 0  | 0             |
| 0  | 0  |            |            | 9   | 0  | 0             |
| 44 | 14 | 2066.1332  | 1308.41897 | 67  | 14 | 1 497.226911  |
| 21 | 0  | 990.459538 | 540.84389  | 68  | 0  | 2 580.279004  |
| 24 | 0  | 1879.91086 | 1121.21617 | 66  | 0  | 0             |
| 3  | 0  | 400.104371 | 67.277327  | 9   | 0  | 0             |
| 0  | 0  |            |            | 9   | 0  | 0             |
| 44 | 31 | 2066.1332  | 1308.41897 | 67  | 32 | 5 283.897025  |
| 21 | 0  | 990.459538 | 540.84389  | 68  | 0  | 3 551.509325  |
| 24 | 6  | 1879.91086 | 1121.21617 | 66  | 7  | 1 272.497718  |
| 3  | 0  | 400.104371 | 67.277327  | 9   | 0  | 0             |
| 19 | 10 | 1506.13058 | 729.582618 | 73  | 26 | 8 116.70719   |
| 23 | 9  | 1517.45    | 927.195    | 138 | 57 | 16 90.1088    |
| 25 | 19 | 1561.08798 | 985.303982 | 109 | 34 | 12 105.307883 |
| 1  | 0  | 538.155172 |            | 20  | 3  | 1 152.533583  |
| 19 | 0  | 1430.49465 | 752.567238 | 48  | 0  | 0             |
| 24 | 6  | 1432.1015  | 932.823462 | 59  | 8  | 2 1658.32774  |
| 25 | 0  | 1586.28343 | 1052.16019 | 61  | 0  | 0             |
| 1  | 0  | 538.155172 |            | 8   | 0  | 0             |
| 19 | 7  | 1430.49465 | 752.567238 | 48  | 7  | 1 507.54057   |
| 24 | 6  | 1432.1015  | 932.823462 | 59  | 12 | 5 567.794049  |
| 25 | 12 | 1586.28343 | 1052.16019 | 61  | 13 | 3 280.64008   |
| 1  | 0  | 538.155172 |            | 8   | 0  | 0             |
| 23 | 0  | 1707.41889 | 1000.16142 | 51  | 0  | 0             |
| 48 | 11 | 1867.43453 | 1100.07515 | 89  | 13 | 3 644.332253  |
| 28 | 0  | 1881.47091 | 965.36855  | 73  | 0  | 0             |
| 1  | 0  | 912.109091 |            | 14  | 0  | 0             |
| 24 | 0  | 1659.70693 | 971.634065 | 54  | 0  | 0             |



AnnotatedResults

|    |    |            |            |    |    |    |            |
|----|----|------------|------------|----|----|----|------------|
| 52 | 10 | 1819.20759 | 1134.57307 | 99 | 14 | 4  | 691.015129 |
| 30 | 0  | 1862.5214  | 1010.24087 | 83 | 0  | 0  |            |
| 1  | 0  | 912.109091 |            | 15 | 0  | 0  |            |
| 24 | 6  | 1659.70693 | 971.634065 | 54 | 6  | 1  | 407.118104 |
| 52 | 20 | 1819.20759 | 1134.57307 | 99 | 31 | 10 | 181.303262 |
| 30 | 7  | 1862.5214  | 1010.24087 | 83 | 9  | 2  | 389.747732 |
| 1  | 0  | 912.109091 |            | 15 | 2  | 1  | 290.410914 |
| 6  | 6  | 680.602723 | 381.441279 | 19 | 11 | 5  | 122.678255 |
| 9  | 2  | 1377.39764 | 464.923422 | 21 | 5  | 3  | 390.290556 |
| 1  | 0  | 496.533333 |            | 6  | 0  | 0  |            |
| 20 | 8  | 959.308929 | 748.344924 | 36 | 12 | 9  | 154.70488  |
| 3  | 0  | 526.35866  | 242.130148 | 28 | 12 | 6  | 105.850707 |
| 11 | 10 | 725.727746 | 330.640354 | 16 | 11 | 1  | 780.581112 |
| 13 | 0  | 1316.73229 | 461.115651 | 16 | 0  | 0  |            |
| 1  | 0  | 496.533333 |            | 4  | 0  | 0  |            |
| 33 | 0  | 1005.98826 | 741.356112 | 40 | 0  | 1  | 1637.70043 |
| 3  | 0  | 405.968063 | 55.894783  | 18 | 5  | 1  | 806.093846 |
| 11 | 10 | 725.727746 | 330.640354 | 16 | 11 | 1  | 780.581112 |
| 13 | 0  | 1316.73229 | 461.115651 | 16 | 0  | 1  | 1429.79878 |
| 1  | 0  | 496.533333 |            | 4  | 0  | 0  |            |
| 33 | 5  | 1005.98826 | 741.356112 | 40 | 5  | 2  | 369.663238 |
| 3  | 0  | 405.968063 | 55.894783  | 18 | 5  | 2  | 374.005832 |
| 13 | 7  | 893.041073 | 675.299614 | 13 | 7  | 1  | 542.281315 |
| 9  | 0  | 1816.72464 | 763.19706  | 11 | 0  | 0  |            |
| 2  | 0  | 470.720366 | 5.397702   | 5  | 0  | 0  |            |
| 31 | 0  | 1105.24613 | 921.1948   | 35 | 0  | 1  | 2005.19237 |
| 8  | 0  | 448.066607 | 117.126955 | 30 | 9  | 2  | 445.115794 |
| 14 | 0  | 853.479085 | 632.799445 | 17 | 0  | 0  |            |
| 14 | 0  | 1483.01439 | 794.485808 | 16 | 0  | 0  |            |
| 2  | 0  | 523.60846  | 69.397358  | 6  | 0  | 0  |            |
| 30 | 0  | 1128.80832 | 931.027245 | 36 | 0  | 1  | 2013.87756 |
| 9  | 0  | 452.647913 | 111.54074  | 37 | 10 | 2  | 445.115794 |
| 14 | 7  | 853.479085 | 632.799445 | 17 | 7  | 1  | 442.944497 |
| 14 | 0  | 1483.01439 | 794.485808 | 16 | 0  | 1  | 1353.26058 |
| 2  | 0  | 523.60846  | 69.397358  | 6  | 0  | 0  |            |
| 30 | 15 | 1128.80832 | 931.027245 | 36 | 15 | 4  | 345.236152 |
| 9  | 4  | 452.647913 | 111.54074  | 37 | 17 | 3  | 445.115794 |
| 3  | 0  | 1677.71956 | 638.897892 | 8  | 1  | 2  | 372.377359 |
| 11 | 7  | 1324.94679 | 717.041349 | 33 | 16 | 10 | 92.280104  |
| 0  | 0  |            |            | 0  | 0  | 0  |            |
| 0  | 0  |            |            | 7  | 0  | 0  |            |
| 6  | 0  | 1388.84046 | 691.228175 | 7  | 0  | 0  |            |
| 13 | 0  | 1226.51398 | 680.120096 | 17 | 0  | 0  |            |
| 0  | 0  |            |            | 0  | 0  | 0  |            |
| 1  | 0  | 431.116279 |            | 4  | 0  | 0  |            |
| 6  | 0  | 1388.84046 | 691.228175 | 7  | 0  | 0  |            |
| 13 | 0  | 1226.51398 | 680.120096 | 17 | 0  | 2  | 816.407505 |
| 0  | 0  |            |            | 0  | 0  | 0  |            |
| 1  | 0  | 431.116279 |            | 4  | 0  | 0  |            |
| 6  | 0  | 1292.62372 | 697.860787 | 9  | 0  | 0  |            |
| 22 | 6  | 1391.36678 | 909.70824  | 32 | 10 | 2  | 772.981574 |
| 0  | 0  |            |            | 0  | 0  | 0  |            |
| 1  | 0  | 432        |            | 4  | 0  | 0  |            |
| 7  | 0  | 1373.60636 | 689.556804 | 15 | 0  | 0  |            |
| 29 | 8  | 1278.39877 | 909.658702 | 39 | 12 | 2  | 967.312615 |
| 1  | 0  | 573.333333 |            | 1  | 0  | 0  |            |
| 2  | 0  | 412.811594 | 27.136504  | 6  | 0  | 0  |            |
| 7  | 0  | 1373.60636 | 689.556804 | 15 | 0  | 0  |            |

AnnotatedResults

|    |    |            |            |     |    |    |            |
|----|----|------------|------------|-----|----|----|------------|
| 29 | 8  | 1278.39877 | 909.658702 | 39  | 12 | 3  | 967.312615 |
| 1  | 0  | 573.333333 |            | 1   | 0  | 0  |            |
| 2  | 0  | 412.811594 | 27.136504  | 6   | 0  | 0  |            |
| 38 | 29 | 1271.52688 | 721.154254 | 147 | 68 | 17 | 94.4514    |
| 31 | 24 | 1611.75108 | 1084.75298 | 111 | 44 | 12 | 128.649321 |
| 13 | 6  | 1138.30776 | 562.25342  | 73  | 24 | 8  | 228.528962 |
| 5  | 1  | 524.428315 | 118.340249 | 29  | 11 | 4  | 166.647011 |
| 0  | 0  |            |            | 2   | 0  | 0  |            |
| 44 | 14 | 1360.88779 | 715.908698 | 96  | 15 | 1  | 1062.30684 |
| 34 | 0  | 1616.18001 | 1049.9627  | 47  | 0  | 0  |            |
| 14 | 0  | 1280.34436 | 606.94038  | 35  | 1  | 1  | 1357.60317 |
| 6  | 0  | 731.399977 | 622.297609 | 14  | 0  | 0  |            |
| 1  | 0  | 411.69403  |            | 2   | 0  | 0  |            |
| 44 | 20 | 1360.88779 | 715.908698 | 96  | 27 | 3  | 247.527807 |
| 34 | 16 | 1616.18001 | 1049.9627  | 47  | 16 | 2  | 253.498873 |
| 14 | 0  | 1280.34436 | 606.94038  | 35  | 1  | 1  | 1357.60317 |
| 6  | 0  | 731.399977 | 622.297609 | 14  | 1  | 1  | 211.15859  |
| 1  | 0  | 411.69403  |            | 2   | 0  | 0  |            |
| 75 | 28 | 1711.33431 | 983.090088 | 124 | 28 | 1  | 1018.33808 |
| 37 | 10 | 1865.62035 | 1314.8112  | 48  | 10 | 1  | 814.779032 |
| 15 | 0  | 1753.48193 | 1056.0913  | 31  | 2  | 1  | 1851.03031 |
| 4  | 0  | 483.379434 | 226.681504 | 12  | 0  | 0  |            |
| 2  | 0  | 552.918443 | 343.880154 | 6   | 0  | 0  |            |
| 83 | 29 | 1675.41234 | 1027.21738 | 136 | 29 | 1  | 1021.59503 |
| 40 | 10 | 1742.8926  | 1323.56382 | 56  | 10 | 1  | 787.637825 |
| 16 | 0  | 1716.71164 | 1037.24109 | 34  | 2  | 1  | 1862.42962 |
| 5  | 0  | 571.594119 | 279.678449 | 15  | 0  | 0  |            |
| 2  | 0  | 552.918443 | 343.880154 | 8   | 0  | 0  |            |
| 83 | 52 | 1675.41234 | 1027.21738 | 136 | 60 | 7  | 235.585676 |
| 40 | 18 | 1742.8926  | 1323.56382 | 56  | 18 | 2  | 303.438694 |
| 16 | 6  | 1716.71164 | 1037.24109 | 34  | 8  | 3  | 260.555587 |
| 5  | 1  | 571.594119 | 279.678449 | 15  | 3  | 2  | 208.987293 |
| 2  | 0  | 552.918443 | 343.880154 | 8   | 0  | 0  |            |
| 0  | 0  |            |            | 0   | 0  | 0  |            |
| 3  | 2  | 362.135    | 32.106422  | 6   | 2  | 2  | 279.554431 |
| 0  | 0  |            |            | 0   | 0  | 0  |            |
| 4  | 0  | 684.86151  | 640.678859 | 5   | 0  | 0  |            |
| 0  | 0  |            |            | 0   | 0  | 0  |            |
| 4  | 0  | 684.86151  | 640.678859 | 5   | 0  | 0  |            |
| 0  | 0  |            |            | 0   | 0  | 0  |            |
| 2  | 0  | 703.295045 | 322.386544 | 3   | 0  | 0  |            |
| 0  | 0  |            |            | 3   | 0  | 0  |            |
| 2  | 0  | 1528.90424 | 845.201177 | 4   | 0  | 0  |            |
| 0  | 0  |            |            | 3   | 0  | 0  |            |
| 2  | 0  | 1528.90424 | 845.201177 | 4   | 0  | 0  |            |
| 1  | 0  | 322.548387 |            | 3   | 0  | 0  |            |
| 0  | 0  |            |            | 2   | 0  | 0  |            |
| 1  | 0  | 331.02459  |            | 3   | 0  | 0  |            |
| 2  | 1  | 536.219815 | 59.78162   | 28  | 7  | 8  | 168.275483 |
| 3  | 0  | 595.368452 | 257.991293 | 3   | 0  | 0  |            |
| 0  | 0  |            |            | 1   | 0  | 0  |            |
| 0  | 0  |            |            | 1   | 0  | 0  |            |
| 2  | 0  | 566.113826 | 17.505103  | 9   | 0  | 0  |            |
| 3  | 0  | 595.368452 | 257.991293 | 3   | 0  | 0  |            |
| 0  | 0  |            |            | 1   | 0  | 0  |            |
| 0  | 0  |            |            | 1   | 0  | 0  |            |
| 2  | 0  | 566.113826 | 17.505103  | 9   | 0  | 0  |            |
| 1  | 0  | 324.925373 |            | 2   | 0  | 0  |            |

AnnotatedResults

|    |    |            |            |     |    |              |
|----|----|------------|------------|-----|----|--------------|
| 0  | 0  |            |            | 4   | 0  | 0            |
| 0  | 0  |            |            | 1   | 0  | 0            |
| 4  | 0  | 555.993184 | 207.6969   | 18  | 0  | 0            |
| 2  | 0  | 549.458622 | 317.537965 | 3   | 0  | 0            |
| 0  | 0  |            |            | 5   | 0  | 0            |
| 1  | 0  | 453.736842 |            | 3   | 0  | 0            |
| 3  | 0  | 543.472868 | 233.788188 | 21  | 0  | 0            |
| 2  | 0  | 549.458622 | 317.537965 | 3   | 0  | 0            |
| 0  | 0  |            |            | 5   | 0  | 0            |
| 1  | 0  | 453.736842 |            | 3   | 0  | 0            |
| 3  | 0  | 543.472868 | 233.788188 | 21  | 0  | 0            |
| 27 | 26 | 1114.38    | 456.97     | 115 | 42 | 11 97.7083   |
| 9  | 5  | 985.688474 | 387.674865 | 58  | 16 | 6 123.221079 |
| 0  | 0  |            |            | 1   | 0  | 0            |
| 23 | 8  | 1335.49589 | 784.564849 | 76  | 18 | 7 108.564828 |
| 0  | 0  |            |            | 5   | 0  | 1 115.078717 |
| 25 | 13 | 1179.85187 | 474.239981 | 85  | 15 | 2 822.37857  |
| 10 | 0  | 933.075976 | 401.588672 | 24  | 0  | 0            |
| 0  | 0  |            |            | 1   | 0  | 0            |
| 27 | 0  | 1258.2277  | 781.013481 | 48  | 0  | 0            |
| 0  | 0  |            |            | 3   | 0  | 0            |
| 25 | 19 | 1179.85187 | 474.239981 | 85  | 21 | 3 822.37857  |
| 10 | 0  | 933.075976 | 401.588672 | 24  | 0  | 0            |
| 0  | 0  |            |            | 1   | 0  | 0            |
| 27 | 0  | 1258.2277  | 781.013481 | 48  | 0  | 0            |
| 0  | 0  |            |            | 3   | 0  | 0            |
| 34 | 15 | 1485.29391 | 691.779076 | 90  | 16 | 2 933.114695 |
| 15 | 0  | 1264.29965 | 556.628381 | 32  | 0  | 0            |
| 4  | 0  | 948.857662 | 591.631062 | 6   | 0  | 0            |
| 27 | 0  | 1413.56485 | 922.942735 | 48  | 0  | 0            |
| 1  | 0  | 304.390244 |            | 6   | 0  | 0            |
| 36 | 16 | 1450.74289 | 697.553107 | 98  | 17 | 2 933.114695 |
| 14 | 0  | 1219.94564 | 551.601249 | 35  | 0  | 0            |
| 4  | 0  | 934.790096 | 615.256927 | 7   | 0  | 0            |
| 27 | 0  | 1487.49787 | 870.275345 | 54  | 0  | 0            |
| 2  | 0  | 338.096761 | 47.668214  | 8   | 0  | 0            |
| 36 | 24 | 1450.74289 | 697.553107 | 98  | 25 | 3 933.114695 |
| 14 | 2  | 1219.94564 | 551.601249 | 35  | 3  | 2 378.348425 |
| 4  | 0  | 934.790096 | 615.256927 | 7   | 0  | 0            |
| 27 | 0  | 1487.49787 | 870.275345 | 54  | 0  | 0            |
| 2  | 0  | 338.096761 | 47.668214  | 8   | 0  | 0            |
| 1  | 0  | 841.111    |            | 30  | 11 | 6 186.189    |
| 1  | 0  | 1503.22353 |            | 4   | 0  | 1 248.613456 |
| 0  | 0  |            |            | 2   | 0  | 0            |
| 0  | 0  |            |            | 1   | 0  | 0            |
| 1  | 0  | 677.980198 |            | 5   | 0  | 0            |
| 1  | 0  | 1402.45258 |            | 3   | 0  | 0            |
| 0  | 0  |            |            | 0   | 0  | 0            |
| 0  | 0  |            |            | 0   | 0  | 0            |
| 1  | 0  | 677.980198 |            | 5   | 0  | 0            |
| 1  | 0  | 1402.45258 |            | 3   | 0  | 0            |
| 0  | 0  |            |            | 0   | 0  | 0            |
| 0  | 0  |            |            | 0   | 0  | 0            |
| 3  | 0  | 394.621342 | 123.270048 | 7   | 0  | 0            |
| 0  | 0  |            |            | 2   | 0  | 0            |
| 0  | 0  |            |            | 0   | 0  | 0            |
| 1  | 0  | 491.669811 |            | 2   | 0  | 0            |
| 5  | 0  | 544.819319 | 223.579236 | 14  | 0  | 0            |

AnnotatedResults

|   |   |            |            |    |    |              |
|---|---|------------|------------|----|----|--------------|
| 2 | 0 | 483.420968 | 81.205511  | 5  | 0  | 0            |
| 0 | 0 |            |            | 0  | 0  | 0            |
| 1 | 0 | 1399.69668 |            | 1  | 0  | 0            |
| 5 | 0 | 544.819319 | 223.579236 | 14 | 0  | 0            |
| 2 | 0 | 483.420968 | 81.205511  | 5  | 0  | 0            |
| 0 | 0 |            |            | 0  | 0  | 0            |
| 1 | 0 | 1399.69668 |            | 1  | 0  | 0            |
| 1 | 0 | 1455.93287 |            | 3  | 0  | 0            |
| 0 | 0 |            |            | 3  | 0  | 2 89.565983  |
| 1 | 0 | 1025.97938 |            | 3  | 0  | 0            |
| 7 | 2 | 1979.72044 | 755.797907 | 11 | 2  | 1 394.090325 |
| 0 | 0 |            |            | 4  | 0  | 0            |
| 3 | 0 | 758.932646 | 422.264554 | 7  | 0  | 0            |
| 1 | 0 | 322.587413 |            | 3  | 0  | 0            |
| 1 | 0 | 715.971223 |            | 2  | 0  | 0            |
| 5 | 0 | 1961.50795 | 648.673913 | 6  | 0  | 0            |
| 1 | 0 | 784.82392  |            | 2  | 0  | 0            |
| 3 | 0 | 758.932646 | 422.264554 | 7  | 0  | 0            |
| 1 | 0 | 322.587413 |            | 3  | 0  | 0            |
| 1 | 0 | 715.971223 |            | 2  | 0  | 0            |
| 5 | 0 | 1961.50795 | 648.673913 | 6  | 0  | 0            |
| 1 | 0 | 784.82392  |            | 2  | 0  | 0            |
| 2 | 0 | 1635.60035 | 373.270096 | 3  | 0  | 0            |
| 4 | 0 | 545.22877  | 349.086284 | 8  | 0  | 0            |
| 0 | 0 |            |            | 1  | 0  | 0            |
| 0 | 0 |            |            | 0  | 0  | 0            |
| 1 | 0 | 1988.6113  |            | 2  | 0  | 0            |
| 4 | 0 | 1569.55784 | 251.162546 | 9  | 0  | 0            |
| 8 | 0 | 468.120066 | 242.975506 | 15 | 0  | 0            |
| 0 | 0 |            |            | 1  | 0  | 0            |
| 2 | 0 | 1397.01703 | 42.574141  | 3  | 0  | 0            |
| 1 | 0 | 1988.6113  |            | 2  | 0  | 0            |
| 4 | 0 | 1569.55784 | 251.162546 | 9  | 0  | 0            |
| 8 | 3 | 468.120066 | 242.975506 | 15 | 3  | 1 377.805601 |
| 0 | 0 |            |            | 1  | 0  | 0            |
| 2 | 0 | 1397.01703 | 42.574141  | 3  | 0  | 0            |
| 1 | 0 | 1988.6113  |            | 2  | 0  | 0            |
| 1 | 0 | 379.6      |            | 15 | 0  | 0            |
| 4 | 2 | 612.843643 | 223.621903 | 28 | 10 | 2 601.99197  |
| 0 | 0 |            |            | 7  | 0  | 0            |
| 4 | 3 | 1360.93028 | 575.597095 | 21 | 3  | 1 529.253535 |
| 0 | 0 |            |            | 0  | 0  | 0            |
| 1 | 0 | 378.348837 |            | 10 | 0  | 0            |
| 7 | 0 | 949.535862 | 427.436752 | 27 | 0  | 0            |
| 2 | 0 | 864.808429 | 188.989865 | 7  | 0  | 0            |
| 4 | 0 | 1348.88933 | 570.175036 | 8  | 0  | 0            |
| 0 | 0 |            |            | 1  | 0  | 0            |
| 1 | 0 | 378.348837 |            | 10 | 0  | 0            |
| 7 | 0 | 949.535862 | 427.436752 | 27 | 0  | 0            |
| 2 | 0 | 864.808429 | 188.989865 | 7  | 0  | 0            |
| 4 | 0 | 1348.88933 | 570.175036 | 8  | 0  | 0            |
| 0 | 0 |            |            | 1  | 0  | 0            |
| 3 | 0 | 450.473026 | 142.835072 | 7  | 0  | 0            |
| 0 | 0 |            |            | 10 | 0  | 0            |
| 1 | 0 | 763.2      |            | 7  | 0  | 0            |
| 5 | 0 | 1932.23957 | 1020.14719 | 7  | 0  | 0            |
| 0 | 0 |            |            | 1  | 0  | 0            |
| 3 | 0 | 450.473026 | 142.835072 | 10 | 0  | 0            |

AnnotatedResults

|    |    |            |            |    |    |              |
|----|----|------------|------------|----|----|--------------|
| 0  | 0  |            |            | 36 | 0  | 0            |
| 1  | 0  | 763.2      |            | 12 | 0  | 0            |
| 8  | 0  | 1815.18295 | 879.156768 | 11 | 0  | 0            |
| 0  | 0  |            |            | 1  | 0  | 0            |
| 3  | 0  | 450.473026 | 142.835072 | 10 | 0  | 0            |
| 0  | 0  |            |            | 36 | 0  | 0            |
| 1  | 0  | 763.2      |            | 12 | 0  | 0            |
| 8  | 0  | 1815.18295 | 879.156768 | 11 | 0  | 0            |
| 0  | 0  |            |            | 1  | 0  | 0            |
| 3  | 2  | 1947.36536 | 624.577089 | 11 | 2  | 1 325.694483 |
| 5  | 0  | 1202.49102 | 583.452612 | 12 | 0  | 0            |
| 4  | 0  | 1236.80052 | 1355.30989 | 10 | 0  | 2 617.73387  |
| 5  | 0  | 1785.57387 | 575.491607 | 7  | 0  | 0            |
| 12 | 0  | 994.809007 | 472.502478 | 16 | 0  | 0            |
| 3  | 0  | 1522.08604 | 1496.84396 | 6  | 0  | 0            |
| 5  | 0  | 1785.57387 | 575.491607 | 7  | 0  | 0            |
| 12 | 0  | 994.809007 | 472.502478 | 16 | 0  | 0            |
| 3  | 0  | 1522.08604 | 1496.84396 | 6  | 0  | 0            |
| 0  | 0  |            |            | 0  | 0  | 0            |
| 7  | 0  | 882.374599 | 370.898363 | 8  | 0  | 0            |
| 1  | 0  | 848.693227 |            | 1  | 0  | 0            |
| 0  | 0  |            |            | 0  | 0  | 0            |
| 12 | 0  | 1126.39199 | 684.408202 | 21 | 0  | 0            |
| 1  | 0  | 848.693227 |            | 2  | 0  | 0            |
| 0  | 0  |            |            | 0  | 0  | 0            |
| 12 | 0  | 1126.39199 | 684.408202 | 21 | 0  | 0            |
| 1  | 0  | 848.693227 |            | 2  | 0  | 0            |
| 2  | 0  | 903.112812 | 449.976317 | 28 | 0  | 0            |
| 9  | 2  | 1023.6824  | 406.262987 | 53 | 12 | 7 108.022004 |
| 0  | 0  |            |            | 3  | 0  | 0            |
| 1  | 0  | 1209.72222 |            | 3  | 0  | 0            |
| 2  | 0  | 901.123249 | 452.789984 | 16 | 0  | 0            |
| 12 | 0  | 1272.72304 | 512.355998 | 41 | 0  | 0            |
| 0  | 0  |            |            | 1  | 0  | 0            |
| 1  | 0  | 1408.68421 |            | 5  | 0  | 0            |
| 2  | 0  | 901.123249 | 452.789984 | 16 | 0  | 0            |
| 12 | 0  | 1272.72304 | 512.355998 | 41 | 0  | 0            |
| 0  | 0  |            |            | 1  | 0  | 0            |
| 1  | 0  | 1408.68421 |            | 5  | 0  | 0            |
| 2  | 0  | 324.689362 | 19.389771  | 10 | 0  | 0            |
| 9  | 0  | 1323.14816 | 636.616803 | 15 | 0  | 0            |
| 1  | 0  | 422.5      |            | 1  | 0  | 0            |
| 0  | 0  |            |            | 2  | 0  | 0            |
| 2  | 0  | 324.689362 | 19.389771  | 10 | 0  | 0            |
| 13 | 0  | 1062.19778 | 785.929317 | 22 | 0  | 0            |
| 1  | 0  | 438.148148 |            | 1  | 0  | 0            |
| 1  | 0  | 467.232323 |            | 3  | 0  | 0            |
| 2  | 0  | 324.689362 | 19.389771  | 10 | 0  | 0            |
| 13 | 0  | 1062.19778 | 785.929317 | 22 | 0  | 0            |
| 1  | 0  | 438.148148 |            | 1  | 0  | 0            |
| 1  | 0  | 467.232323 |            | 3  | 0  | 0            |
| 29 | 20 | 1274.25732 | 692.010782 | 50 | 24 | 7 147.105342 |
| 0  | 0  |            |            | 1  | 0  | 0            |
| 1  | 0  | 505.142857 |            | 8  | 0  | 0            |
| 0  | 0  |            |            | 4  | 0  | 0            |
| 0  | 0  |            |            | 10 | 2  | 1 265.441004 |
| 31 | 10 | 1260.4273  | 751.067444 | 38 | 11 | 1 550.966501 |
| 0  | 0  |            |            | 0  | 0  | 0            |

AnnotatedResults

|    |    |            |            |     |    |               |
|----|----|------------|------------|-----|----|---------------|
| 1  | 0  | 488.444444 |            | 2   | 0  | 0             |
| 0  | 0  |            |            | 1   | 0  | 0             |
| 0  | 0  |            |            | 3   | 0  | 0             |
| 31 | 17 | 1260.4273  | 751.067444 | 38  | 18 | 2 533.596128  |
| 0  | 0  |            |            | 0   | 0  | 0             |
| 1  | 0  | 488.444444 |            | 2   | 0  | 0             |
| 0  | 0  |            |            | 1   | 0  | 0             |
| 0  | 0  |            |            | 3   | 0  | 0             |
| 41 | 13 | 1581.7565  | 954.515289 | 47  | 14 | 1 601.99197   |
| 1  | 0  | 3070.91653 |            | 2   | 0  | 0             |
| 0  | 0  |            |            | 4   | 0  | 0             |
| 1  | 0  | 651.955224 |            | 4   | 0  | 0             |
| 0  | 0  |            |            | 5   | 0  | 0             |
| 43 | 13 | 1510.2035  | 954.579065 | 56  | 14 | 1 555.851918  |
| 1  | 0  | 3070.91653 |            | 2   | 0  | 0             |
| 0  | 0  |            |            | 5   | 0  | 0             |
| 1  | 0  | 679.212598 |            | 7   | 0  | 0             |
| 0  | 0  |            |            | 7   | 0  | 0             |
| 43 | 19 | 1510.2035  | 954.579065 | 56  | 20 | 2 452.715332  |
| 1  | 0  | 3070.91653 |            | 2   | 0  | 0             |
| 0  | 0  |            |            | 5   | 0  | 0             |
| 1  | 0  | 679.212598 |            | 7   | 0  | 0             |
| 0  | 0  |            |            | 7   | 0  | 0             |
| 0  | 0  |            |            | 3   | 2  | 1 275.754662  |
| 3  | 0  | 798.655899 | 474.431272 | 24  | 0  | 2 12075.6658  |
| 1  | 0  | 3015.27273 |            | 5   | 1  | 2 8656.95937  |
| 1  | 0  | 416.914286 |            | 5   | 1  | 2 137.334507  |
| 1  | 0  | 783.786667 |            | 4   | 0  | 0             |
| 4  | 0  | 685.873645 | 448.258893 | 13  | 0  | 0             |
| 1  | 0  | 3021.7     |            | 5   | 0  | 0             |
| 1  | 0  | 399.272727 |            | 2   | 0  | 0             |
| 1  | 0  | 783.786667 |            | 4   | 0  | 0             |
| 4  | 0  | 685.873645 | 448.258893 | 13  | 0  | 0             |
| 1  | 0  | 3021.7     |            | 5   | 0  | 0             |
| 1  | 0  | 399.272727 |            | 2   | 0  | 0             |
| 2  | 0  | 481.063482 | 14.628519  | 10  | 0  | 0             |
| 1  | 0  | 411.778338 |            | 6   | 0  | 0             |
| 0  | 0  |            |            | 2   | 0  | 0             |
| 2  | 0  | 554.89972  | 173.362776 | 3   | 0  | 0             |
| 3  | 0  | 455.32411  | 50.499112  | 12  | 0  | 0             |
| 2  | 0  | 611.967889 | 291.780891 | 10  | 0  | 0             |
| 0  | 0  |            |            | 2   | 0  | 0             |
| 5  | 0  | 463.60393  | 145.878122 | 8   | 0  | 0             |
| 3  | 0  | 455.32411  | 50.499112  | 12  | 0  | 0             |
| 2  | 0  | 611.967889 | 291.780891 | 10  | 0  | 0             |
| 0  | 0  |            |            | 2   | 0  | 0             |
| 5  | 0  | 463.60393  | 145.878122 | 8   | 0  | 0             |
| 4  | 0  | 1569.21881 | 1319.79603 | 27  | 6  | 2 118.335662  |
| 20 | 12 | 600.522286 | 353.530209 | 70  | 17 | 11 81.966445  |
| 19 | 16 | 477.682371 | 233.340922 | 41  | 18 | 5 161.761593  |
| 54 | 35 | 1079.43317 | 524.973675 | 99  | 42 | 14 166.104186 |
| 60 | 42 | 1233.40056 | 706.129116 | 108 | 50 | 13 101.508114 |
| 4  | 0  | 1573.59783 | 1326.41028 | 15  | 0  | 0             |
| 23 | 8  | 609.298213 | 325.195333 | 38  | 8  | 1 336.550966  |
| 20 | 0  | 469.407701 | 230.117152 | 30  | 0  | 0             |
| 56 | 11 | 1096.53196 | 558.005953 | 69  | 11 | 1 425.031301  |
| 56 | 17 | 1247.43375 | 711.922091 | 79  | 17 | 1 2815.08598  |
| 4  | 0  | 1573.59783 | 1326.41028 | 15  | 0  | 0             |

AnnotatedResults

|    |    |            |            |    |    |   |            |
|----|----|------------|------------|----|----|---|------------|
| 23 | 11 | 609.298213 | 325.195333 | 38 | 11 | 2 | 215.501183 |
| 20 | 8  | 469.407701 | 230.117152 | 30 | 8  | 2 | 181.846086 |
| 56 | 22 | 1096.53196 | 558.005953 | 69 | 22 | 3 | 402.232687 |
| 56 | 17 | 1247.43375 | 711.922091 | 79 | 17 | 1 | 2815.08598 |
| 10 | 0  | 1636.27166 | 1351.48214 | 32 | 14 | 1 | 726.298698 |
| 34 | 10 | 635.407662 | 342.363887 | 51 | 10 | 1 | 400.06139  |
| 23 | 12 | 511.348458 | 258.662791 | 36 | 12 | 1 | 540.652842 |
| 62 | 17 | 1472.57633 | 711.717668 | 78 | 18 | 1 | 499.398208 |
| 57 | 18 | 1364.00205 | 913.89151  | 76 | 18 | 1 | 3567.98306 |
| 12 | 0  | 1450.85619 | 1298.08934 | 38 | 15 | 1 | 726.298698 |
| 38 | 10 | 633.200301 | 352.38773  | 60 | 10 | 1 | 400.06139  |
| 24 | 13 | 515.493426 | 257.889672 | 38 | 13 | 1 | 559.108863 |
| 67 | 17 | 1412.16417 | 739.033618 | 91 | 18 | 1 | 498.312559 |
| 61 | 18 | 1330.34753 | 904.682091 | 83 | 18 | 1 | 3515.32912 |
| 12 | 0  | 1450.85619 | 1298.08934 | 38 | 15 | 1 | 726.298698 |
| 38 | 10 | 633.200301 | 352.38773  | 60 | 13 | 2 | 400.06139  |
| 24 | 13 | 515.493426 | 257.889672 | 38 | 13 | 1 | 559.108863 |
| 67 | 25 | 1412.16417 | 739.033618 | 91 | 27 | 4 | 280.097256 |
| 61 | 18 | 1330.34753 | 904.682091 | 83 | 18 | 1 | 3515.32912 |
| 2  | 0  | 579.344694 | 370.947864 | 16 | 0  | 1 | 11004.6738 |
| 6  | 4  | 1114.82653 | 822.43682  | 40 | 6  | 6 | 212.787062 |
| 1  | 0  | 791.705882 |            | 14 | 3  | 2 | 8363.29151 |
| 0  | 0  |            |            | 6  | 0  | 0 |            |
| 2  | 0  | 584.073034 | 377.634746 | 4  | 0  | 0 |            |
| 6  | 0  | 1125.93794 | 824.387596 | 16 | 0  | 0 |            |
| 1  | 0  | 791.705882 |            | 4  | 0  | 0 |            |
| 0  | 0  |            |            | 1  | 0  | 0 |            |
| 2  | 0  | 584.073034 | 377.634746 | 4  | 0  | 0 |            |
| 6  | 0  | 1125.93794 | 824.387596 | 16 | 0  | 0 |            |
| 1  | 0  | 791.705882 |            | 4  | 0  | 0 |            |
| 0  | 0  |            |            | 1  | 0  | 0 |            |
| 0  | 0  |            |            | 5  | 0  | 0 |            |
| 6  | 0  | 1422.92402 | 1039.47038 | 24 | 0  | 0 |            |
| 1  | 0  | 1047.70086 |            | 4  | 0  | 0 |            |
| 0  | 0  |            |            | 6  | 0  | 0 |            |
| 0  | 0  |            |            | 5  | 0  | 0 |            |
| 6  | 0  | 1488.50355 | 977.373036 | 31 | 0  | 0 |            |
| 2  | 0  | 1043.85799 | 7.121913   | 6  | 0  | 0 |            |
| 0  | 0  |            |            | 7  | 0  | 0 |            |
| 0  | 0  |            |            | 5  | 0  | 0 |            |
| 6  | 0  | 1488.50355 | 977.373036 | 31 | 0  | 0 |            |
| 2  | 0  | 1043.85799 | 7.121913   | 6  | 0  | 0 |            |
| 0  | 0  |            |            | 7  | 0  | 0 |            |
| 0  | 0  |            |            | 25 | 0  | 1 | 5064.00639 |
| 1  | 0  | 689.47541  |            | 35 | 2  | 8 | 138.420155 |
| 0  | 0  |            |            | 17 | 1  | 1 | 1105.18995 |
| 0  | 0  |            |            | 16 | 0  | 0 |            |
| 1  | 0  | 689.47541  |            | 13 | 0  | 0 |            |
| 1  | 0  | 326.730924 |            | 14 | 0  | 0 |            |
| 0  | 0  |            |            | 16 | 0  | 0 |            |
| 1  | 0  | 689.47541  |            | 13 | 0  | 0 |            |
| 1  | 0  | 326.730924 |            | 14 | 0  | 0 |            |
| 2  | 0  | 603.96047  | 113.709721 | 20 | 0  | 0 |            |
| 4  | 0  | 488.749657 | 243.342136 | 15 | 0  | 0 |            |
| 1  | 0  | 398.27027  |            | 23 | 0  | 0 |            |
| 3  | 0  | 673.571433 | 156.280362 | 21 | 0  | 0 |            |
| 4  | 0  | 490.463362 | 242.761618 | 16 | 0  | 0 |            |
| 1  | 0  | 398.27027  |            | 23 | 0  | 0 |            |

AnnotatedResults

|    |   |            |            |    |    |              |
|----|---|------------|------------|----|----|--------------|
| 3  | 0 | 673.571433 | 156.280362 | 21 | 0  | 0            |
| 4  | 0 | 490.463362 | 242.761618 | 16 | 0  | 0            |
| 1  | 0 | 398.27027  |            | 23 | 0  | 0            |
| 0  | 0 |            |            | 3  | 0  | 0            |
| 0  | 0 |            |            | 6  | 0  | 0            |
| 0  | 0 |            |            | 2  | 0  | 0            |
| 0  | 0 |            |            | 4  | 0  | 0            |
| 0  | 0 |            |            | 2  | 0  | 0            |
| 0  | 0 |            |            | 4  | 0  | 0            |
| 0  | 0 |            |            | 0  | 0  | 0            |
| 8  | 0 | 845.974654 | 341.390373 | 10 | 0  | 0            |
| 1  | 0 | 743.52381  |            | 5  | 0  | 0            |
| 0  | 0 |            |            | 0  | 0  | 0            |
| 11 | 0 | 771.78882  | 365.961832 | 16 | 0  | 0            |
| 1  | 0 | 743.52381  |            | 8  | 0  | 0            |
| 0  | 0 |            |            | 0  | 0  | 0            |
| 11 | 6 | 771.78882  | 365.961832 | 16 | 6  | 2 443.487321 |
| 1  | 0 | 743.52381  |            | 8  | 0  | 0            |
| 0  | 0 |            |            | 2  | 0  | 0            |
| 1  | 0 | 1414.4     |            | 1  | 0  | 0            |
| 2  | 1 | 398.212    | 130.327    | 11 | 3  | 4 559.109    |
| 8  | 2 | 696.435777 | 253.629127 | 55 | 13 | 9 86.309038  |
| 0  | 0 |            |            | 0  | 0  | 0            |
| 2  | 0 | 914.251282 | 707.3171   | 2  | 0  | 0            |
| 2  | 0 | 372.34026  | 93.738483  | 3  | 0  | 0            |
| 10 | 0 | 642.667522 | 266.037657 | 28 | 0  | 0            |
| 0  | 0 |            |            | 0  | 0  | 0            |
| 2  | 0 | 914.251282 | 707.3171   | 2  | 0  | 0            |
| 2  | 0 | 372.34026  | 93.738483  | 3  | 0  | 0            |
| 10 | 0 | 642.667522 | 266.037657 | 28 | 0  | 0            |
| 3  | 0 | 2883.36188 | 533.653209 | 4  | 0  | 0            |
| 1  | 0 | 2064.37956 |            | 1  | 0  | 0            |
| 4  | 0 | 854.352848 | 615.89204  | 5  | 0  | 0            |
| 2  | 0 | 896.062679 | 593.598211 | 3  | 0  | 0            |
| 4  | 0 | 2324.50855 | 949.73705  | 6  | 0  | 0            |
| 2  | 0 | 1310.09454 | 1066.7201  | 6  | 0  | 0            |
| 6  | 0 | 890.878697 | 523.012054 | 9  | 0  | 0            |
| 3  | 0 | 829.398417 | 360.124021 | 11 | 0  | 0            |
| 4  | 0 | 2324.50855 | 949.73705  | 6  | 0  | 0            |
| 2  | 0 | 1310.09454 | 1066.7201  | 6  | 0  | 0            |
| 6  | 0 | 890.878697 | 523.012054 | 9  | 0  | 0            |
| 3  | 0 | 829.398417 | 360.124021 | 11 | 0  | 0            |
| 8  | 5 | 756.83094  | 325.168668 | 31 | 10 | 4 404.946808 |
| 12 | 0 | 792.697867 | 540.620865 | 51 | 1  | 4 102.593762 |
| 1  | 1 | 369.198917 |            | 79 | 8  | 4 131.363442 |
| 5  | 1 | 1030.21305 | 725.561308 | 10 | 2  | 5 192.702569 |
| 9  | 5 | 725.461489 | 315.009609 | 14 | 6  | 1 391.919028 |
| 11 | 0 | 895.289611 | 511.255254 | 26 | 0  | 0            |
| 0  | 0 |            |            | 66 | 0  | 0            |
| 6  | 0 | 720.918466 | 500.690624 | 9  | 0  | 0            |
| 9  | 5 | 725.461489 | 315.009609 | 14 | 6  | 1 391.919028 |
| 11 | 0 | 895.289611 | 511.255254 | 26 | 0  | 0            |
| 0  | 0 |            |            | 66 | 0  | 0            |
| 6  | 0 | 720.918466 | 500.690624 | 9  | 0  | 0            |
| 4  | 0 | 657.876509 | 201.860901 | 7  | 0  | 0            |



AnnotatedResults

|    |    |            |            |     |    |               |
|----|----|------------|------------|-----|----|---------------|
| 8  | 0  | 1073.81948 | 919.176825 | 20  | 0  | 0             |
| 10 | 0  | 695.614198 | 285.142758 | 45  | 0  | 0             |
| 20 | 3  | 674.607636 | 437.360068 | 23  | 3  | 1 474.428297  |
| 6  | 0  | 598.618641 | 203.393464 | 9   | 0  | 0             |
| 9  | 0  | 991.119369 | 894.596878 | 24  | 0  | 0             |
| 9  | 0  | 674.989307 | 298.781685 | 97  | 0  | 0             |
| 21 | 3  | 667.182636 | 427.081891 | 28  | 3  | 1 387.576435  |
| 6  | 0  | 598.618641 | 203.393464 | 9   | 0  | 0             |
| 9  | 0  | 991.119369 | 894.596878 | 24  | 0  | 0             |
| 9  | 5  | 674.989307 | 298.781685 | 97  | 5  | 1 846.262832  |
| 21 | 6  | 667.182636 | 427.081891 | 28  | 6  | 2 283.897025  |
| 3  | 1  | 451.635319 | 108.687293 | 34  | 3  | 15 137.334507 |
| 14 | 0  | 549.042365 | 256.467554 | 62  | 14 | 19 229.071787 |
| 1  | 0  | 452.40625  |            | 34  | 13 | 12 213.872711 |
| 1  | 0  | 560.16826  |            | 23  | 17 | 4 162.304417  |
| 44 | 34 | 1760.31867 | 1034.21354 | 195 | 94 | 28 90.651631  |
| 5  | 0  | 482.101123 | 119.443153 | 25  | 0  | 0             |
| 14 | 0  | 505.334924 | 219.144643 | 32  | 0  | 0             |
| 2  | 0  | 514.512063 | 71.056237  | 14  | 0  | 0             |
| 1  | 0  | 563.4      |            | 12  | 3  | 1 1750.06502  |
| 40 | 20 | 1711.73754 | 1059.52832 | 118 | 21 | 1 1300.06381  |
| 5  | 0  | 482.101123 | 119.443153 | 25  | 0  | 0             |
| 14 | 0  | 505.334924 | 219.144643 | 32  | 0  | 0             |
| 2  | 0  | 514.512063 | 71.056237  | 14  | 2  | 1 323.523187  |
| 1  | 0  | 563.4      |            | 12  | 3  | 1 1750.06502  |
| 40 | 24 | 1711.73754 | 1059.52832 | 118 | 45 | 5 594.392432  |
| 2  | 0  | 593.227565 | 87.223806  | 19  | 0  | 0             |
| 16 | 0  | 650.450286 | 283.963374 | 36  | 0  | 0             |
| 6  | 0  | 471.703813 | 81.072702  | 25  | 0  | 0             |
| 0  | 0  |            |            | 5   | 0  | 1 1378.23049  |
| 23 | 0  | 1416.84297 | 917.61611  | 68  | 0  | 0             |
| 6  | 0  | 569.464441 | 335.001997 | 26  | 0  | 0             |
| 19 | 0  | 610.929487 | 270.614662 | 45  | 0  | 0             |
| 8  | 0  | 542.120051 | 244.080514 | 32  | 0  | 0             |
| 0  | 0  |            |            | 7   | 1  | 1 1559.53375  |
| 25 | 0  | 1386.72593 | 923.839543 | 79  | 0  | 0             |
| 6  | 0  | 569.464441 | 335.001997 | 26  | 0  | 0             |
| 19 | 0  | 610.929487 | 270.614662 | 45  | 1  | 1 395.718797  |
| 8  | 1  | 542.120051 | 244.080514 | 32  | 1  | 2 182.931735  |
| 0  | 0  |            |            | 7   | 2  | 2 568.879697  |
| 25 | 7  | 1386.72593 | 923.839543 | 79  | 10 | 2 505.369273  |
| 3  | 2  | 1023.80465 | 629.687127 | 21  | 4  | 2 185.645855  |
| 8  | 7  | 1045.46852 | 531.855058 | 15  | 9  | 3 287.696794  |
| 0  | 0  |            |            | 0   | 0  | 0             |
| 0  | 0  |            |            | 0   | 0  | 0             |
| 3  | 0  | 509.116    | 280.623    | 12  | 3  | 4 8642.3      |
| 2  | 0  | 956.042832 | 820.086869 | 7   | 0  | 0             |
| 11 | 0  | 1086.10497 | 433.177513 | 17  | 0  | 0             |
| 0  | 0  |            |            | 0   | 0  | 0             |
| 0  | 0  |            |            | 0   | 0  | 0             |
| 3  | 0  | 526.85968  | 267.037074 | 5   | 0  | 0             |
| 2  | 0  | 956.042832 | 820.086869 | 7   | 0  | 0             |
| 11 | 0  | 1086.10497 | 433.177513 | 17  | 0  | 0             |
| 0  | 0  |            |            | 0   | 0  | 0             |
| 0  | 0  |            |            | 0   | 0  | 0             |
| 3  | 0  | 526.85968  | 267.037074 | 5   | 0  | 0             |
| 4  | 0  | 1001.92691 | 637.976639 | 6   | 0  | 0             |
| 5  | 0  | 670.109923 | 395.106576 | 5   | 0  | 0             |

AnnotatedResults

|     |     |            |            |     |     |               |
|-----|-----|------------|------------|-----|-----|---------------|
| 1   | 0   | 433.273973 |            | 2   | 0   | 0             |
| 0   | 0   |            |            | 1   | 0   | 0             |
| 5   | 0   | 657.964288 | 387.324026 | 7   | 0   | 0             |
| 5   | 0   | 985.08912  | 555.209539 | 8   | 0   | 0             |
| 8   | 0   | 695.019858 | 425.392899 | 12  | 0   | 0             |
| 1   | 0   | 433.273973 |            | 3   | 0   | 0             |
| 1   | 0   | 423.36     |            | 5   | 0   | 0             |
| 5   | 0   | 679.269376 | 361.909463 | 9   | 0   | 0             |
| 5   | 0   | 985.08912  | 555.209539 | 8   | 0   | 0             |
| 8   | 0   | 695.019858 | 425.392899 | 12  | 0   | 0             |
| 1   | 0   | 433.273973 |            | 3   | 0   | 0             |
| 1   | 0   | 423.36     |            | 5   | 0   | 0             |
| 5   | 0   | 679.269376 | 361.909463 | 9   | 0   | 0             |
| 0   | 0   |            |            | 0   | 0   | 1 10381.5117  |
| 53  | 44  | 1718.28246 | 914.059668 | 123 | 60  | 19 134.077562 |
| 148 | 96  | 806.39     | 443.377    | 212 | 102 | 32 86.8519    |
| 39  | 21  | 812.525518 | 973.350023 | 73  | 35  | 24 89.023159  |
| 2   | 0   | 615.15     | 44.3012    | 2   | 0   | 0             |
| 72  | 31  | 1733.05407 | 962.487807 | 91  | 36  | 3 512.968811  |
| 152 | 63  | 813.853094 | 460.643303 | 183 | 64  | 10 231.243083 |
| 46  | 4   | 882.989519 | 1000.95589 | 64  | 6   | 1 604.706091  |
| 2   | 0   | 615.150223 | 44.301175  | 2   | 0   | 0             |
| 72  | 49  | 1733.05407 | 962.487807 | 91  | 59  | 6 371.291711  |
| 152 | 73  | 813.853094 | 460.643303 | 183 | 74  | 14 179.67479  |
| 46  | 8   | 882.989519 | 1000.95589 | 64  | 11  | 3 172.618076  |
| 0   | 0   |            |            | 0   | 0   | 0             |
| 86  | 48  | 1921.64767 | 1160.41856 | 112 | 53  | 5 362.606525  |
| 167 | 76  | 1028.42063 | 670.114521 | 201 | 77  | 7 360.978052  |
| 32  | 0   | 712.379039 | 407.780208 | 38  | 0   | 0             |
| 1   | 0   | 323.970297 |            | 3   | 0   | 0             |
| 102 | 43  | 1694.36713 | 1125.27884 | 133 | 46  | 4 517.311404  |
| 182 | 100 | 988.926393 | 669.134936 | 222 | 103 | 11 326.237307 |
| 36  | 0   | 669.465408 | 365.114472 | 48  | 0   | 0             |
| 1   | 0   | 323.970297 |            | 3   | 0   | 0             |
| 102 | 62  | 1694.36713 | 1125.27884 | 133 | 68  | 8 277.383135  |
| 182 | 113 | 988.926393 | 669.134936 | 222 | 117 | 15 326.237307 |
| 36  | 4   | 669.465408 | 365.114472 | 48  | 4   | 1 425.031301  |
| 1   | 0   | 331.904762 |            | 13  | 0   | 3 8828.49179  |
| 20  | 6   | 1107.10378 | 889.162259 | 78  | 19  | 8 88.480335   |
| 5   | 5   | 919.26846  | 833.883338 | 16  | 6   | 3 340.350735  |
| 2   | 0   | 368.531282 | 34.547424  | 16  | 2   | 3 207.901645  |
| 9   | 5   | 649.269257 | 275.271924 | 18  | 6   | 4 387.033611  |
| 1   | 0   | 331.904762 |            | 4   | 0   | 0             |
| 26  | 0   | 1447.83758 | 1078.94999 | 48  | 0   | 0             |
| 8   | 0   | 1075.67015 | 865.271993 | 14  | 0   | 0             |
| 4   | 0   | 429.606294 | 184.07418  | 12  | 0   | 0             |
| 14  | 3   | 640.564225 | 235.575446 | 17  | 3   | 1 616.648222  |
| 1   | 0   | 331.904762 |            | 4   | 0   | 0             |
| 26  | 5   | 1447.83758 | 1078.94999 | 48  | 5   | 2 626.96188   |
| 8   | 0   | 1075.67015 | 865.271993 | 14  | 0   | 0             |
| 4   | 0   | 429.606294 | 184.07418  | 12  | 0   | 0             |
| 14  | 9   | 640.564225 | 235.575446 | 17  | 9   | 2 357.178283  |
| 3   | 0   | 383.725721 | 113.721985 | 11  | 0   | 0             |
| 29  | 0   | 1673.63264 | 1049.10411 | 48  | 0   | 0             |
| 12  | 0   | 1211.16893 | 804.43411  | 19  | 0   | 0             |
| 3   | 0   | 384.890724 | 59.047938  | 16  | 0   | 0             |
| 27  | 13  | 741.726411 | 376.231596 | 31  | 13  | 2 345.236152  |
| 5   | 0   | 356.463245 | 59.903316  | 21  | 0   | 0             |

AnnotatedResults

|    |    |            |            |     |    |               |
|----|----|------------|------------|-----|----|---------------|
| 30 | 0  | 1585.06372 | 945.632266 | 53  | 0  | 0             |
| 12 | 0  | 1210.79255 | 805.393886 | 21  | 0  | 0             |
| 4  | 0  | 406.886569 | 66.896666  | 22  | 0  | 0             |
| 29 | 12 | 723.752563 | 365.838706 | 34  | 12 | 2 270.326421  |
| 5  | 0  | 356.463245 | 59.903316  | 21  | 0  | 0             |
| 30 | 4  | 1585.06372 | 945.632266 | 53  | 9  | 2 378.348425  |
| 12 | 7  | 1210.79255 | 805.393886 | 21  | 8  | 2 326.780132  |
| 4  | 0  | 406.886569 | 66.896666  | 22  | 0  | 0             |
| 29 | 12 | 723.752563 | 365.838706 | 34  | 12 | 2 270.326421  |
| 4  | 2  | 1531.82329 | 788.916525 | 18  | 6  | 2 223.100721  |
| 0  | 0  |            |            | 1   | 0  | 0             |
| 0  | 0  |            |            | 0   | 0  | 0             |
| 0  | 0  |            |            | 1   | 0  | 0             |
| 6  | 0  | 1394.31869 | 754.391    | 13  | 0  | 0             |
| 0  | 0  |            |            | 0   | 0  | 0             |
| 0  | 0  |            |            | 0   | 0  | 0             |
| 0  | 0  |            |            | 3   | 0  | 0             |
| 6  | 0  | 1394.31869 | 754.391    | 13  | 0  | 0             |
| 0  | 0  |            |            | 0   | 0  | 0             |
| 0  | 0  |            |            | 0   | 0  | 0             |
| 0  | 0  |            |            | 3   | 0  | 0             |
| 5  | 0  | 1177.77394 | 667.561826 | 11  | 0  | 0             |
| 0  | 0  |            |            | 2   | 0  | 0             |
| 0  | 0  |            |            | 0   | 0  | 0             |
| 0  | 0  |            |            | 2   | 0  | 0             |
| 5  | 0  | 1183.0394  | 680.634031 | 14  | 0  | 0             |
| 1  | 0  | 604.371429 |            | 6   | 0  | 0             |
| 0  | 0  |            |            | 0   | 0  | 0             |
| 1  | 0  | 398        |            | 5   | 0  | 0             |
| 5  | 0  | 1183.0394  | 680.634031 | 14  | 0  | 0             |
| 1  | 0  | 604.371429 |            | 6   | 0  | 0             |
| 0  | 0  |            |            | 0   | 0  | 0             |
| 1  | 0  | 398        |            | 5   | 0  | 0             |
| 69 | 57 | 1168.20626 | 607.591454 | 110 | 70 | 19 144.391221 |
| 44 | 34 | 1311.83439 | 764.608504 | 106 | 58 | 25 114.535893 |
| 7  | 1  | 481.331634 | 202.293598 | 34  | 12 | 8 273.040542  |
| 28 | 21 | 1212.80852 | 560.599111 | 67  | 34 | 14 116.70719  |
| 3  | 1  | 342.368863 | 14.462063  | 16  | 2  | 3 172.618076  |
| 33 | 26 | 1857.7342  | 882.792966 | 120 | 50 | 18 85.22339   |
| 9  | 4  | 2036.44784 | 1094.2815  | 53  | 11 | 6 172.075252  |
| 9  | 6  | 1099.22143 | 547.670142 | 38  | 11 | 6 86.851862   |
| 22 | 16 | 1328.53    | 710.201    | 78  | 23 | 11 89.0232    |
| 75 | 50 | 1184.08088 | 633.58304  | 84  | 50 | 3 596.563728  |
| 57 | 0  | 1282.84129 | 716.754738 | 82  | 0  | 0             |
| 6  | 0  | 468.314254 | 209.661729 | 13  | 0  | 0             |
| 39 | 0  | 1270.86385 | 607.482043 | 53  | 0  | 0             |
| 5  | 0  | 400.104525 | 98.125677  | 9   | 0  | 0             |
| 38 | 0  | 1919.35604 | 911.758054 | 69  | 0  | 0             |
| 10 | 0  | 1788.71332 | 1032.58095 | 30  | 0  | 0             |
| 9  | 0  | 1103.82368 | 541.567703 | 17  | 0  | 0             |
| 22 | 0  | 1324.74166 | 711.263705 | 38  | 0  | 0             |
| 75 | 50 | 1184.08088 | 633.58304  | 84  | 50 | 3 596.563728  |
| 57 | 17 | 1282.84129 | 716.754738 | 82  | 17 | 3 518.939877  |
| 6  | 1  | 468.314254 | 209.661729 | 13  | 1  | 2 176.417845  |
| 39 | 12 | 1270.86385 | 607.482043 | 53  | 12 | 2 383.776666  |
| 5  | 0  | 400.104525 | 98.125677  | 9   | 0  | 0             |
| 38 | 13 | 1919.35604 | 911.758054 | 69  | 13 | 2 360.978052  |
| 10 | 7  | 1788.71332 | 1032.58095 | 30  | 10 | 2 218.758128  |

AnnotatedResults

|    |    |            |            |    |    |              |
|----|----|------------|------------|----|----|--------------|
| 9  | 0  | 1103.82368 | 541.567703 | 17 | 0  | 0            |
| 22 | 0  | 1324.74166 | 711.263705 | 38 | 0  | 0            |
| 50 | 16 | 1605.21053 | 776.786441 | 57 | 16 | 2 993.910998 |
| 48 | 0  | 1564.5544  | 841.756132 | 69 | 0  | 0            |
| 11 | 0  | 590.343469 | 386.322512 | 23 | 0  | 0            |
| 47 | 4  | 1743.64758 | 861.142594 | 55 | 4  | 1 512.968811 |
| 8  | 0  | 513.158972 | 290.042671 | 13 | 0  | 0            |
| 37 | 0  | 1928.40165 | 1040.34066 | 63 | 0  | 0            |
| 10 | 0  | 1781.08477 | 1388.00395 | 19 | 0  | 0            |
| 11 | 0  | 1620.56743 | 881.875161 | 25 | 0  | 0            |
| 27 | 0  | 1535.43497 | 735.007051 | 50 | 0  | 0            |
| 56 | 17 | 1604.63134 | 785.722428 | 69 | 17 | 2 961.34155  |
| 52 | 0  | 1518.27747 | 829.624368 | 76 | 0  | 0            |
| 16 | 0  | 590.72491  | 333.598172 | 29 | 0  | 0            |
| 50 | 4  | 1708.41932 | 867.098455 | 59 | 4  | 1 511.340339 |
| 8  | 0  | 519.535904 | 287.532834 | 16 | 0  | 0            |
| 40 | 0  | 1913.30947 | 1028.6225  | 73 | 0  | 0            |
| 9  | 0  | 1759.74366 | 1486.30852 | 20 | 0  | 0            |
| 13 | 0  | 1510.06242 | 921.312474 | 30 | 0  | 0            |
| 26 | 0  | 1565.78323 | 782.502786 | 49 | 0  | 0            |
| 56 | 36 | 1604.63134 | 785.722428 | 69 | 37 | 5 332.208373 |
| 52 | 3  | 1518.27747 | 829.624368 | 76 | 3  | 1 421.774356 |
| 16 | 0  | 590.72491  | 333.598172 | 29 | 0  | 0            |
| 50 | 22 | 1708.41932 | 867.098455 | 59 | 22 | 4 194.873866 |
| 8  | 0  | 519.535904 | 287.532834 | 16 | 0  | 0            |
| 40 | 0  | 1913.30947 | 1028.6225  | 73 | 0  | 0            |
| 9  | 0  | 1759.74366 | 1486.30852 | 20 | 0  | 0            |
| 13 | 8  | 1510.06242 | 921.312474 | 30 | 8  | 2 307.238463 |
| 26 | 0  | 1565.78323 | 782.502786 | 49 | 0  | 0            |

**SphereMax $\epsilon$  SphereMean SphereSizeStdev-um<sup>2</sup>**

10545.9874 5362.01684 7331.24142

437.516256 437.516256

10852.1402 7454.33249 4985.47644

2594.15656 676.019612 805.5842

## AnnotatedResults

9212.26846 5503.36825 4799.75481  
10624.6969 10463.7495 227.613935  
494.51279 328.098419 151.966154

393.547501 393.547501

642.70378 642.70378

393.547501 393.547501

642.70378 427.383539 187.23053

265.983828 265.983828

269.783597 269.783597

269.783597 269.783597

659.531329 468.27629 180.144296

1124.18879 1031.90869 130.503774  
10331.029 10331.029  
9098.81821 5290.36406 4358.8708  
12097.3788 11225.0604 686.134149  
9533.07753 1487.67741 2657.75727

637.818363 637.818363

637.818363 637.818363

630.761649 599.549261 44.140982

453.258156 453.258156

488.541725 488.541725

488.541725 488.541725

709.471149 605.791739 146.624828  
9979.82179 1085.84214 2418.19346

## AnnotatedResults

18302.9443 9976.02202 5466.10633  
19888.5336 3028.57096 7437.18159  
10510.161 7174.9409 3984.90736  
624.24776 281.337996 142.851936

605.792 605.792  
558.023215 385.1725 122.209336  
210.072942 210.072942

605.791739 391.557145 203.495592

689.92948 689.92948

698.614667 698.614667  
623.704935 430.785237 150.94445  
193.245393 193.245393

698.614667 463.571814 212.830678  
9756.72107 2575.15771 4787.77441  
247.527807 247.527807  
14611.1973 1141.73364 2915.14381  
6722.87696 764.44443 1417.38079

1048.73624 1048.73624  
2184.32433 1555.73398 888.961002

1048.73624 716.16598 289.447622  
2184.32433 711.177168 689.555426

1034.62281 1034.62281  
2285.83245 1615.17323 948.45537

1017.79526 776.238518 341.61282  
2296.68893 1619.24441 958.051235

1202.35547 1202.35547  
1017.79526 474.971121 338.838593  
2296.68893 611.417371 604.028119  
1405.91452 1405.91452

10342.4283 9224.75341 1037.77712

AnnotatedResults

15974.2288 6554.92717 6880.09808  
549.880853 507.133452 54.867993

427.745421 427.745421

7793.86898 1453.35735 2101.26188  
7240.18836 4245.15618 4235.61514

11498.6437 1364.53064 2588.30626  
3666.77706 2436.73756 1739.53854

5161.17191 2730.67683 1807.95735  
3666.77706 1657.64921 1348.32412

5161.17191 2067.34573 1748.41728  
1022.13785 983.054515 55.272187

3381.79438 1782.27259 1385.60934



AnnotatedResults

3381.79438 1782.27259 1385.60934

4703.57116 2084.03758 1752.19907  
5760.99 1075.24 1635.15

502.655152 328.951428 245.654163

1634.98631 785.104646 736.027565

423.945652 423.945652

422.31718 422.31718

666.588042 511.702221 134.665614

211.701414 179.403378 45.676321  
7617.99396 7617.99396  
10517.2177 3078.98899 4168.54593

872.318391 872.318391

872.318391 654.826853 188.506445

624.24776 624.24776

529.796359 529.796359

529.796359 529.796359

748.554487 748.554487

11260.3439 11260.3439

AnnotatedResults

406.57528 406.57528

3746.02938 2318.76378 1579.64523  
919.001267 426.659773 427.094984  
5290.36406 1662.80604 2419.53216  
8771.49526 1757.48362 3116.72715  
2284.7468 2284.7468

2284.7468 2284.7468  
868.518622 868.518622

757.782498 757.782498  
1887.94236 1887.94236

1908.02685 1908.02685

1908.02685 1908.02685  
841.920239 841.920239

887.517467 887.517467

## AnnotatedResults

9349.06014 8702.19471 882.207358  
17598.3586 10501.2587 4448.18059  
605.248915 438.963787 282.391879

707.299853 707.299853

305.067166 305.067166

1386.37285 1331.2762 77.91843  
103.679411 103.679411

158.504649 158.504649  
1607.8451 386.002245 443.031519

8095.67921 4313.00919 5349.50323  
960.798726 561.822984 333.191747  
540.652842 540.652842  
92.822928 92.822928

490.713 490.713

10294.6598 4088.68712 4530.25748

AnnotatedResults

305.60999 305.60999

11306.484 4204.11264 4801.52008

## AnnotatedResults

14130.2552 6459.90882 4607.94036  
624.24776 293.8488 179.277208

278.468783 278.468783  
230.700259 230.700259

308.324111 308.324111  
459.229221 459.229221

7215.76128 1404.24081 2508.12665  
25469.8514 6259.71226 9420.19346

377.805601 365.049233 18.040228  
659.531329 551.509325 152.766183

539.02437 539.02437

359.34958 359.34958

775.695694 567.794049 294.017326  
510.25469 375.815245 127.009636  
724.670225 349.578745 169.914561

609.591508 609.591508

609.591508 609.591508

AnnotatedResults

545.538259 545.538259

545.538259 444.030146 89.593942

629.133177 629.133177  
1151.87282 673.946325 352.010584  
11362.3949 4042.88633 4778.18532

1017.25244 1017.25244

1017.25244 880.732165 193.068819

440.230377 440.230377

441.858849 441.858849

1010.73855 748.011663 371.551921  
807.179494 624.519172 258.320706

## AnnotatedResults

|            |            |            |
|------------|------------|------------|
| 12792.7365 | 1150.10649 | 2158.74531 |
| 372.377359 | 344.331445 | 33.87472   |
| 1046.02212 | 424.143043 | 270.910283 |
| 1298.43534 | 473.148783 | 351.825079 |
| 15287.0134 | 5472.11967 | 6928.93869 |
| 1781.006   | 1220.63055 | 494.56145  |

|            |            |           |
|------------|------------|-----------|
| 524.368118 | 524.368118 |           |
| 1134.50245 | 1134.50245 |           |
| 453.80098  | 453.80098  |           |
| 3161.95061 | 909.230432 | 817.97217 |

|            |            |            |
|------------|------------|------------|
| 524.368118 | 524.368118 |            |
| 1134.50245 | 688.57242  | 630.640296 |
| 453.80098  | 414.989054 | 54.888352  |
| 604.163266 | 526.810827 | 109.392869 |

|            |            |  |
|------------|------------|--|
| 485.827604 | 485.827604 |  |
| 1139.38787 | 1139.38787 |  |

|            |            |            |
|------------|------------|------------|
| 603.620442 | 523.825294 | 112.847381 |
|------------|------------|------------|

|            |            |  |
|------------|------------|--|
| 493.427142 | 493.427142 |  |
| 1142.10199 | 1142.10199 |  |

|            |            |            |
|------------|------------|------------|
| 3002.90314 | 784.691066 | 667.389138 |
| 338.179438 | 314.838    | 33.009778  |
| 677.444525 | 516.632874 | 128.896351 |
| 1142.10199 | 580.369475 | 333.029474 |
| 229.614611 | 229.614611 |            |
| 5079.74829 | 5079.74829 |            |
| 17636.8991 | 11832.8198 | 3585.77456 |

|           |            |            |
|-----------|------------|------------|
| 13482.666 | 1108.26595 | 3096.92566 |
|-----------|------------|------------|

## AnnotatedResults

675.816053 667.402279 11.898874

675.816053 438.989636 219.172534

2016.04885 1104.82806 790.107588

2283.11833 1176.29991 771.180353

242.099566 242.099566

2283.11833 781.259642 671.937464

9989.59263 5217.0828 6749.34813  
4738.85473 1114.14655 1493.11426  
235.585676 235.585676

451.086859 451.086859

505.912097 505.912097

505.912097 505.912097  
997.710767 714.627979 400.339519

700.785963 431.002366 167.06642  
4121.12086 908.86855 1245.7984  
88.480335 88.480335  
10029.7616 10029.7616



AnnotatedResults

530.339184 530.339184  
344.693328 344.693328

345.236152 345.236152

522.739646 522.739646  
435.344959 435.344959  
341.436383 341.436383

522.739646 522.739646  
435.344959 418.245999 24.181582  
341.436383 267.883712 104.019185

4738.31191 657.983275 1065.19651  
9526.02 940.543 2119.86

1334.26173 1334.26173

2166.95396 705.535674 975.075992  
1334.26173 826.178339 718.538426

1319.60548 1319.60548

1323.94807 1323.94807

2049.70395 675.707488 784.893053  
1323.94807 692.915013 445.746545  
786.009353 418.856676 237.499928  
10848.9 2008.36 3353.89  
1060.67837 450.878081 332.294511  
8878.97444 3335.11151 4171.67888  
4143.91948 1089.99087 1710.03531  
362.063701 362.063701  
1302.23511 618.586879 318.495768

460.857694 411.460697 69.857903  
1302.23511 517.459447 285.526126  
1016.16679 561.461101 407.000234

AnnotatedResults

447.829914 343.336268 147.776332  
1207.24089 636.09942 308.693052

446.744266 342.793444 147.008663  
1188.24204 622.709758 298.361631

544.995435 410.194108 156.314817  
1263.15177 555.80257 363.137215  
573.222291 422.31718 130.878041

471.171352 445.658618 36.080455  
15602.937 8049.07388 5765.10689  
4937.52837 1812.30886 2706.89446

85.766214 85.766214

4200.91601 4200.91601

4200.91601 4200.91601

2807.48645 2807.48645

2812.91469 2812.91469

294.753507 294.753507  
2812.91469 2812.91469

355.549811 355.549811  
1282.15062 463.933697 417.664098

617.191046 617.191046

## AnnotatedResults

2517.07553 616.648222 647.608405  
907.059136 381.632511 214.157672  
329.494252 329.494252

895.117005 895.117005  
1404.82887 1404.82887

1404.82887 1404.82887  
648.132022 497.950677 131.288651

1480.82425 1480.82425  
503.197977 503.197977

508.626218 501.298092 10.363535

1482.99555 1482.99555  
567.251225 451.629683 125.980116  
312.12388 312.12388

15303.2981 5416.54051 5677.65044  
1604.04533 713.705178 500.423417  
11594.1808 11594.1808  
628.590353 628.590353  
10700.6922 10700.6922

1273.46543 1273.46543

## AnnotatedResults

1307.12053 1022.95209 401.874857

13584.2 8344.51 5019.21

317.552121 317.552121

1807032.25 63398.4939 329417.85  
234414.805 6510.33778 25271.0819  
106330.021 9026.90005 16956.5325  
935.285991 543.186022 181.774436  
1608.93075 834.065255 275.245677  
1441.19809 849.478021 270.38123  
935.285991 390.476667 173.351217  
1608.93075 590.390181 307.425703  
1441.19809 609.92108 309.945712  
950.485067 431.409484 217.734817  
1311.46312 708.133476 214.693306  
3912.67639 924.119323 889.79775  
950.485067 430.957131 218.05486  
1311.46312 708.133476 214.693306  
4040.24007 889.998949 765.365858  
950.485067 307.622963 152.673857  
1311.46312 519.0982 233.309995  
4040.24007 586.240711 528.289179

AnnotatedResults

701.871611 701.871611

20846.0754 8507.23037 7648.18614  
29263.1065 10890.7225 10940.7672  
18821.3414 7379.31419 6093.90455  
23258.9287 9237.44715 4470.58299

694.814898 519.482701 247.957171

416.888939 416.888939  
253.498873 239.928269 19.191731

297.467628 260.284175 52.585344

252.956049 252.956049

343.60768 256.936759 128.217237

## AnnotatedResults

1446.62633 1446.62633

6425.40933 885.589887 1529.52762  
14066.2019 1228.6933 3298.83841  
22995.659 8006.86284 7803.77953  
900.545246 624.682019 176.829225  
787.095001 787.095001  
414.174818 372.920183 55.815943  
1028.10892 627.931209 210.699065  
787.095001 567.468355 192.709297  
811.522087 400.759307 200.247845  
845.177184 627.504704 152.259134  
870.147094 870.147094  
347.950273 347.950273  
847.348481 620.596034 156.508934  
754.525553 754.525553  
351.750042 351.750042  
847.348481 500.409834 200.869961  
1021.05221 693.322131 251.081984  
426.116949 316.792167 95.087699  
13325.247 3425.01676 5441.58318  
11905.219 1639.56639 3499.29299  
5914.61182 1148.10924 1799.93211  
9878.8565 935.037197 1987.75668  
10672.4654 7198.17377 4150.30624  
531.424832 531.424832  
1413.51406 783.430938 510.271894  
787.637825 787.637825  
555.309094 555.309094

531.424832 531.424832  
1413.51406 783.430938 510.271894  
787.637825 497.769735 259.210889  
632.932946 478.974449 106.93141

1409.17146 899.640539 513.557921  
699.157491 699.157491  
328.408604 328.408604

1409.71429 816.045622 532.369176  
1221.89714 1221.89714  
1457.48281 763.889269 502.851761

582.993125 551.780737 44.140982  
1409.71429 608.180165 475.964784  
1221.89714 692.860731 350.826447  
1457.48281 581.183711 377.82812

## AnnotatedResults

1871.11481 539.908972 414.944071  
16320.0077 9082.71443 8230.36556  
10587.242 7875.4477 3597.92404  
9664.44097 1002.01459 2499.61941  
815.864681 722.860811 87.084513

1399.40063 723.274392 340.40179

271.954894 271.954894  
809.350791 668.759339 150.919754

809.350791 673.427627 152.58409

1443.36939 718.807725 382.012361  
415.260466 415.260466

437.516256 319.859124 93.269314  
18930.449 9559.01676 5169.43486  
21595.1727 10448.2219 7107.37188  
28248.5682 10142.669 5901.52719  
9952.68058 1687.95043 3145.35266

6702.79247 1438.96648 1985.28598

524.368118 512.154575 17.272558  
6702.79247 1164.65007 1683.11231

6037.8329 1422.80238 1744.36143

6341.27159 1335.23882 1777.07152

700.243139 551.690266 128.733275  
6341.27159 964.43884 1412.99911  
9909.79748 3107.93961 4624.37281

19005.3587 8007.37981 9813.5186

AnnotatedResults

461.943342 461.943342  
312.12388 312.12388

1549.76292 420.281589 391.810553  
13335.5606 3117.98185 5716.6552  
6626.79709 6626.79709  
12318.3082 6583.73304 5858.32133  
679.615822 679.615822

637.818363 637.818363  
1211.58348 777.686049 394.122225  
377.805601 377.805601

637.818363 637.818363

434.802135 434.802135

427.745421 427.745421

427.745421 427.745421  
38994.3148 14795.4861 9782.34394  
14877.2 6958.61 6114.82  
22717.1902 7008.80367 8004.29816  
434.802135 434.802135  
1016.16679 952.294481 95.095497  
2355.85676 1054.81587 869.292429  
434.802135 292.853623 116.872025  
1016.16679 656.165819 413.752972  
2355.85676 830.831118 806.573281  
463.02899 463.02899  
1025.93762 846.443774 216.269157  
2075.75951 932.789 804.166765  
462.486166 462.486166  
1008.56725 873.223098 141.794906  
2098.0153 1094.06205 846.536579  
462.486166 292.582211 126.003035  
1008.56725 606.443128 379.685289  
2098.0153 772.361203 725.489246  
9636.21411 2223.1061 3573.91323



## AnnotatedResults

8020.23 1132.45 2584  
438.601904 438.601904  
11083.9261 7541.18435 5116.50316

620.990815 620.990815

622.619287 622.619287

604.163266 604.163266

604.163266 499.398208 148.160167

14888.5805 2517.57115 4132.54332  
13776.8766 4428.19648 4947.3273  
16406.8596 2221.61218 4633.99224

12381.2758 12381.2758

1192.04181 1192.04181

1025.3948 402.232687 352.21319  
1192.04181 732.269763 650.215862

1431.42725 1431.42725

1423.82772 1423.82772

1015.62396 430.459542 351.027839  
1423.82772 822.649982 850.193704  
247.527807 247.527807  
205.730349 205.730349

437.516256 437.516256

5835.90232 5835.90232

395.718797 395.718797

1058.50707 519.935054 292.991996

326.237307 326.237307

## AnnotatedResults

|            |            |            |
|------------|------------|------------|
| 13047.8638 | 7246.70225 | 6565.4475  |
| 9739.89352 | 5514.0076  | 4929.35851 |
| 752.89708  | 313.752352 | 223.881453 |
| 9625.90045 | 8110.19975 | 1338.55974 |
| 19719.1725 | 7573.23811 | 5933.90577 |

451.629683 451.629683

|            |            |           |
|------------|------------|-----------|
| 451.629683 | 425.031301 | 37.615794 |
| 200.844931 | 200.844931 |           |
| 236.1285   | 187.662059 | 27.16601  |

362.606525 328.046721 32.975543

446.201442 446.201442

510.797515 394.090325 101.682133

|            |            |            |
|------------|------------|------------|
| 446.201442 | 446.201442 |            |
| 168.275483 | 168.275483 |            |
| 510.797515 | 314.078047 | 135.001029 |
| 12818.2492 | 5671.0508  | 4597.21055 |
| 17662.9547 | 7868.46207 | 5305.80818 |
| 5692.05392 | 1649.75112 | 1769.08991 |
| 6259.30514 | 926.872217 | 1703.94414 |

2028.53381 2028.53381  
6499.77624 6499.77624

|            |            |            |
|------------|------------|------------|
| 446.744266 | 446.744266 |            |
| 2028.53381 | 974.007446 | 927.747647 |
| 6499.77624 | 3661.62023 | 4013.75872 |

## AnnotatedResults

2820.51423 1774.49211 1479.29866  
3168.4645 2317.04484 1204.08923

2795.00149 1702.56791 1544.93438  
4446.27252 4446.27252

288.782442 234.77144 76.383091  
2795.00149 1137.7594 1142.43153  
4446.27252 1626.57253 1894.18302  
995.53947 582.341736 408.820893  
5321.84786 815.683739 1304.88466  
8717.76 2360.28 3322.47  
1075.87744 453.926247 350.030256  
11221.8034 8403.1348 4724.6176

1250.66682 875.575336 530.459458  
1566.04764 1566.04764

1250.66682 702.776318 479.866773  
1566.04764 1566.04764

496.141263 496.141263  
1453.68304 1453.68304  
1203.98394 1203.98394

497.226911 497.226911  
861.461908 720.870456 198.826338

497.226911 388.119259 97.169311  
861.461908 664.416746 171.251338  
272.497718 272.497718

818.035977 390.629821 253.809604  
3399.16 870.113 832.136  
6924.80754 848.796012 1919.11316  
152.533583 152.533583

2678.83713 2168.58243 721.609103

507.54057 507.54057  
2678.83713 1290.29298 892.817913  
616.648222 444.030146 168.19404

1935.16806 1267.85625 646.530971

## AnnotatedResults

1744.63678 997.982179 503.494383

407.118104 407.118104

1744.63678 755.339789 417.294152

430.459542 410.103637 28.787597

290.410914 290.410914

9660.09837 2310.15097 4126.52155

13628.1428 5339.94199 7222.85382

8560.33667 1392.16298 2735.39216

14761.5596 6408.58178 6722.31998

780.581112 780.581112

1637.70043 1637.70043

806.093846 806.093846

780.581112 780.581112

1429.79878 1429.79878

1637.70043 1003.68183 896.637695

806.093846 590.049839 305.532365

542.281315 542.281315

2005.19237 2005.19237

800.665605 622.890699 251.411682

2013.87756 2013.87756

800.665605 622.890699 251.411682

442.944497 442.944497

1353.26058 1353.26058

2013.87756 795.644481 814.028747

800.665605 598.915966 182.560347

496.684087 434.530723 87.89813

2564.30123 644.006558 774.193558

1120.38902 968.398264 214.947393

2247.29193 1510.13675 1042.49485

2244.57781 1605.94522 903.162883

## AnnotatedResults

2244.57781 1520.26947 655.6467

2574.07207 672.62297 697.602409  
8599.42001 1165.89578 2360.88353  
2435.65191 806.908082 771.663415  
10730.5476 5158.7292 5764.09312

1062.30684 1062.30684

1357.60317 1357.60317

1062.30684 776.41946 458.535195  
851.14825 552.323561 422.601927  
1357.60317 1357.60317  
211.15859 211.15859

1018.33808 1018.33808  
814.779032 814.779032  
1851.03031 1851.03031

1021.59503 1021.59503  
787.637825 787.637825  
1862.42962 1862.42962

1395.60086 696.133185 436.991172  
787.637825 545.538259 342.38049  
1862.42962 993.368174 809.581941  
236.671324 222.829309 19.575566

366.406294 322.980363 61.413541

11856.9077 7162.63236 4502.87027

AnnotatedResults

4539.64 945.452 1259.44  
485.28478 303.167281 172.813502

370.748887 272.03244 111.192164  
115.078717 115.078717  
1159.47236 990.925465 238.361305

1643.12867 1208.32653 412.550274

1257.72353 1095.41911 229.533108

1262.06612 1097.59041 232.603785

2265.20513 1486.79532 693.897428  
384.31949 381.333957 4.222181

7750.99 1656.16 2992.62  
248.613456 248.613456

AnnotatedResults

232.328731 160.947357 100.948508

394.090325 394.090325

377.805601 377.805601

2818.34293 1710.16745 1567.19679

529.253535 529.253535



AnnotatedResults

325.694483 325.694483

9146.04391 4881.88889 6030.42586

1366.83118 647.666744 560.068033

775.15287 437.283617 243.340229

265.441004 265.441004  
550.966501 550.966501

## AnnotatedResults

550.966501 542.281315 12.282708

601.99197 601.99197

555.851918 555.851918

555.851918 504.283625 72.92858

275.754662 275.754662  
12507.211 12291.4384 305.14853  
9410.39927 9033.67932 532.762466  
8337.23595 4237.28523 5798.20591

632.932946 375.634304 363.875229  
10845.6263 3334.96347 4455.18828  
9512.45021 2197.56924 4092.80604  
9836.51622 973.244908 2553.3303  
3390.47957 569.255499 889.113445

336.550966 336.550966

425.031301 425.031301  
2815.08598 2815.08598

## AnnotatedResults

|            |            |            |
|------------|------------|------------|
| 336.550966 | 276.026075 | 85.595122  |
| 326.780132 | 254.313109 | 102.483846 |
| 578.107708 | 468.457232 | 95.641855  |
| 2815.08598 | 2815.08598 |            |
| 726.298698 | 726.298698 |            |
| 400.06139  | 400.06139  |            |
| 540.652842 | 540.652842 |            |
| 499.398208 | 499.398208 |            |
| 3567.98306 | 3567.98306 |            |
| 726.298698 | 726.298698 |            |
| 400.06139  | 400.06139  |            |
| 559.108863 | 559.108863 |            |
| 498.312559 | 498.312559 |            |
| 3515.32912 | 3515.32912 |            |
| 726.298698 | 726.298698 |            |
| 1053.62165 | 726.841522 | 462.136894 |
| 559.108863 | 559.108863 |            |
| 498.312559 | 419.060235 | 96.506743  |
| 3515.32912 | 3515.32912 |            |
| 11004.6738 | 11004.6738 |            |
| 10388.0255 | 6769.83125 | 5064.81631 |
| 11326.0257 | 9844.65858 | 2094.96941 |

|            |            |            |
|------------|------------|------------|
| 5064.00639 | 5064.00639 |            |
| 7804.72547 | 4036.84741 | 3077.81537 |
| 1105.18995 | 1105.18995 |            |

AnnotatedResults

1196.3844 819.935862 532.378631

20752.7 10173.1 8275.08  
6721.79131 1825.93978 2536.15117

9657.92708 4999.68173 5284.05716  
10174.1528 7014.10211 4657.12697  
536.853073 257.977172 187.438873  
7566.96849 1706.74766 3276.22008  
391.919028 391.919028

391.919028 391.919028

## AnnotatedResults

474.428297 474.428297

387.576435 387.576435

846.262832 846.262832  
387.576435 335.73673 73.312414  
31238.4435 10580.0043 9046.89951  
24955.2541 10142.5548 5239.6677  
17356.8018 10645.4599 5735.42721  
1874.91458 858.883494 728.23419  
10035.1899 1338.97267 2684.6425

1750.06502 1750.06502  
1300.06381 1300.06381

323.523187 323.523187  
1750.06502 1750.06502  
1300.06381 856.902185 302.986472

1378.23049 1378.23049

1559.53375 1559.53375

395.718797 395.718797  
1134.50245 658.717092 672.862106  
1559.53375 1064.20672 700.498199  
609.591508 557.480391 73.696249  
201.93058 193.788218 11.515039  
1709.35321 831.063756 767.728175

11924.8 9970.19 1446.45

## AnnotatedResults

10381.5117 10381.5117  
11548.5836 1739.52281 3438.9755  
19180.1 3079.97 4916.33  
25209.8387 6085.1943 7236.02371

1696.86826 937.81917 658.916586  
685.586887 490.713021 139.565049  
604.706091 604.706091

1696.86826 712.818565 488.409911  
720.327632 480.24427 187.307842  
682.329942 486.55137 274.63057

1180.09968 646.503549 319.424448  
795.237363 569.344975 138.839739

1196.92723 750.725784 307.612266  
1002.05336 575.590978 198.955566

1196.92723 603.077618 299.586801  
1462.36823 607.999224 298.379414  
425.031301 425.031301  
10247.4341 9513.89774 710.694529  
848.976953 491.12014 278.912582  
714.356567 494.331849 195.554107  
11619.6935 7150.98426 6095.00952  
11057.3277 5773.34183 5893.10203

616.648222 616.648222

713.270918 670.116399 61.029706

616.648222 486.913252 183.472953

385.405139 365.320645 28.403763

## AnnotatedResults

385.405139 327.86578 81.372941

382.691018 380.519721 3.070677  
708.928325 517.854228 270.219579

385.405139 327.86578 81.372941  
1164.9006 694.000661 665.953082

8071.79494 1355.63186 2157.20801  
7219.01822 694.337212 1389.56212  
12957.2122 6129.50232 5263.60768  
7376.98005 1539.75944 2509.23668  
12090.8649 7575.47274 6462.52517  
996.082295 508.41512 314.635182  
1005.85313 509.621396 344.407165  
8244.41302 1583.50848 3264.6974  
9288.26 1137.07 2712.98  
1976.96551 1270.02754 690.809425

1976.96551 1270.02754 690.809425  
656.817208 607.058329 76.52537  
366.406294 271.412069 134.34212  
623.162111 503.469389 169.271072

624.24776 492.612906 186.159795  
600.906322 409.832225 270.219579

AnnotatedResults

1096.50476 1045.20788 72.544745

512.968811 512.968811

1099.21888 1030.28022 97.493996

511.340339 511.340339

1099.21888 652.36605 350.953207  
421.774356 421.774356

593.849608 429.238188 172.159637

368.034766 337.636614 42.989479



| <b>GeneID</b> | <i>Ratio of NumSpheres to total sCellsInSpheres to TotalNumCellsInSpheres</i> |        |
|---------------|-------------------------------------------------------------------------------|--------|
| LATS1         | -2.193                                                                        | -1.495 |
| WT1           | -1.326                                                                        | -1.121 |
| CDK4          | -0.968                                                                        | -1.622 |
| FOSL1         | -1.185                                                                        | -1.7   |
| PTCH          | -1.098                                                                        | -1.649 |
| LATS2         | -1.75                                                                         | -0.748 |
| FOSL2         | -1.79                                                                         | -1.193 |
| PHB           | -0.441                                                                        | -2.64  |
| FAT3          | -3.856                                                                        | 1      |
| MCF7          | -2.408                                                                        | 1      |
| JUND          | -1.842                                                                        | -0.57  |
| RAD54L        | -1.222                                                                        | -0.931 |
| FAT           | -0.85                                                                         | -0.778 |
| ST7L          | -0.378                                                                        | -0.941 |
| BCR           | -1.865                                                                        | 1      |
| FOS           | -0.548                                                                        | -1.457 |
| SMAD4         | -0.625                                                                        | -0.928 |
| PTEN          | -1.472                                                                        | -0.305 |
| BCL3          | -0.638                                                                        | -0.679 |
| TUSC4         | -1.04                                                                         | -0.478 |
| TUSC5         | -0.699                                                                        | -0.626 |
| TGFBR2        | -0.325                                                                        | -0.518 |
| DMBT1         | -0.438                                                                        | -0.661 |
| LZTS1         | -1.392                                                                        | 1      |
| FER           | -0.838                                                                        | 1      |
| CYLD          | -0.859                                                                        | 1      |
| RAD51         | -0.583                                                                        | 1      |
| DLEC1         | -0.514                                                                        | -0.441 |
| Hela          | -1.938                                                                        | 1      |
| LZTS2         | -0.408                                                                        | -0.505 |
| CD82          | -0.261                                                                        | -0.532 |
| TUSC2         | -1.47                                                                         | 1      |
| ST5           | 1                                                                             | 1      |
| OVCA2         | -1.139                                                                        | 1      |
| TP73L         | -0.879                                                                        | 1      |
| DCC           | 1                                                                             | -0.808 |
| FLI1          | -0.78                                                                         | 1      |
| TUSC3         | 1                                                                             | 1      |
| MLH1          | -0.554                                                                        | 1      |
| FoxP3         | 1                                                                             | 1      |
| CDK2AP2       | 1                                                                             | 1      |
| CCND1         | -0.497                                                                        | 1      |
| GLTSCR1       | -0.456                                                                        | 1      |
| ST18          | 1                                                                             | 1      |
| ST14          | -0.398                                                                        | 1      |
| HIC1          | -0.355                                                                        | 1      |
| NF2           | -0.345                                                                        | 1      |
| BCL2          | -0.338                                                                        | 1      |
| TAL1          | 1                                                                             | 1      |
| MSH2          | -0.287                                                                        | 1      |
| JUNB          | -0.281                                                                        | 1      |
| APC           | 1                                                                             | 1      |
| MCC           | -0.21                                                                         | 1      |
| BAX           | -0.197                                                                        | 1      |
| CDKN1C        | -0.165                                                                        | 1      |
| MEN1          | -0.162                                                                        | 1      |
| GLTSCR2       | -0.152                                                                        | 1      |

|        |        |   |
|--------|--------|---|
| FoxO3A | -0.148 | 1 |
| Hs578T | -0.108 | 1 |
| ARMET  | 1      | 1 |
| BRCA1  | 1      | 1 |
| BRCA2  | 1      | 1 |
| CDC73  | 1      | 1 |
| CDH1   | 1      | 1 |
| CDKN1A | 1      | 1 |
| CDKN2A | 1      | 1 |
| CHD5   | 1      | 1 |
| FAT2   | 1      | 1 |
| HCK    | 1      | 1 |
| NBL1   | 1      | 1 |
| NF1    | 1      | 1 |
| SHC002 | 1      | 1 |
| ST13   | 1      | 1 |
| ST7    | 1      | 1 |
| TP53   | 1      | 1 |
| TP73   | 1      | 1 |
| TSSC1  | 1      | 1 |
| TSSC4  | 1      | 1 |
| VHL    | 1      | 1 |

*of NumDoublePositive to total* **Average**

|        |         |
|--------|---------|
| -2.864 | -2.184  |
| -2.787 | -1.7447 |
| -1.858 | -1.4827 |
| -1.517 | -1.4673 |
| -1.637 | -1.4613 |
| -1.865 | -1.4543 |
| -1.328 | -1.437  |
| -0.895 | -1.3253 |
| -1.004 | -1.2867 |
| -2.106 | -1.1713 |
| -1.047 | -1.153  |
| -1.297 | -1.15   |
| -1.701 | -1.1097 |
| -1.566 | -0.9617 |
| -1.73  | -0.865  |
| -0.465 | -0.8233 |
| -0.661 | -0.738  |
| -0.414 | -0.7303 |
| -0.707 | -0.6747 |
| -0.387 | -0.635  |
| -0.554 | -0.6263 |
| -0.838 | -0.5603 |
| -0.412 | -0.5037 |
| -1.033 | -0.475  |
| -0.585 | -0.141  |
| -0.497 | -0.1187 |
| -0.557 | -0.0467 |
| 1      | 0.015   |
| 1      | 0.02067 |
| 1      | 0.029   |
| 1      | 0.069   |
| 1      | 0.17667 |
| -1.173 | 0.27567 |
| 1      | 0.287   |
| 1      | 0.37367 |
| 1      | 0.39733 |
| 1      | 0.40667 |
| -0.626 | 0.458   |
| 1      | 0.482   |
| -0.508 | 0.49733 |
| -0.505 | 0.49833 |
| 1      | 0.501   |
| 1      | 0.51467 |
| -0.401 | 0.533   |
| 1      | 0.534   |
| 1      | 0.54833 |
| 1      | 0.55167 |
| 1      | 0.554   |
| -0.302 | 0.566   |
| 1      | 0.571   |
| 1      | 0.573   |
| -0.23  | 0.59    |
| 1      | 0.59667 |
| 1      | 0.601   |
| 1      | 0.61167 |
| 1      | 0.61267 |
| 1      | 0.616   |



| Affyprobe | logFC    | AveExpr  | t        | P.Value     | adj.P.Val   | B        | chrom |
|-----------|----------|----------|----------|-------------|-------------|----------|-------|
| 8091385   | 3.625922 | 8.85688  | 13.55118 | 1.53E-08    | 3.38E-05    | 9.991657 | chr3  |
| 8178193   | 3.047828 | 8.053966 | 7.296792 | 1.06E-05    | 0.000881414 | 3.786441 | chr6  |
| 8121784   | 2.669579 | 6.194377 | 7.832465 | 5.24E-06    | 0.000588789 | 4.482407 | chr6  |
| 7902452   | 2.638292 | 6.290796 | 10.31022 | 3.03E-07    | 0.00015839  | 7.249623 | chr1  |
| 8082797   | 2.328474 | 10.45843 | 14.39739 | 7.78E-09    | 3.38E-05    | 10.58267 | chr3  |
| 8095110   | 2.263646 | 8.899334 | 13.63995 | 1.42E-08    | 3.38E-05    | 10.05578 | chr4  |
| 8102594   | 2.211915 | 6.658322 | 8.541442 | 2.18E-06    | 0.000383074 | 5.346493 | chr4  |
| 8091402   | 2.098529 | 9.493534 | 10.48332 | 2.53E-07    | 0.000148044 | 7.418486 | chr3  |
| 7934997   | 2.033483 | 6.601716 | 12.81298 | 2.85E-08    | 4.72E-05    | 9.438001 | chr10 |
| 7931108   | 1.987979 | 8.857987 | 5.130799 | 0.000263926 | 0.005704529 | 0.55651  | chr10 |
| 7934979   | 1.978068 | 9.034152 | 5.336558 | 0.000189087 | 0.004688272 | 0.892851 | chr10 |
| 7930593   | 1.971894 | 8.391632 | 11.06918 | 1.41E-07    | 0.000112153 | 7.969312 | chr10 |
| 8026398   | 1.962931 | 11.10204 | 5.232112 | 0.000223795 | 0.005186681 | 0.722878 | chr19 |
| 7932407   | 1.924684 | 7.808691 | 7.324433 | 1.02E-05    | 0.000862168 | 3.8233   | chr10 |
| 8163618   | 1.882413 | 7.483188 | 6.3455   | 4.02E-05    | 0.001810744 | 2.452293 | chr9  |
| 8058857   | 1.838727 | 10.81852 | 8.956599 | 1.33E-06    | 0.000294736 | 5.824123 | chr2  |
| 8101429   | 1.805743 | 6.728029 | 8.153173 | 3.50E-06    | 0.000457104 | 4.88108  | chr4  |
| 7943892   | 1.797535 | 8.120799 | 5.175345 | 0.00024542  | 0.005477385 | 0.629839 | chr11 |
| 8126853   | 1.792545 | 7.935904 | 12.18984 | 4.93E-08    | 6.53E-05    | 8.940541 | chr6  |
| 8161964   | 1.783262 | 8.177626 | 10.52244 | 2.43E-07    | 0.000148044 | 7.456246 | chr9  |
| 7930498   | 1.774747 | 8.216994 | 9.70287  | 5.77E-07    | 0.000191225 | 6.633804 | chr10 |
| 8085716   | 1.7625   | 8.447567 | 9.708785 | 5.73E-07    | 0.000191225 | 6.639983 | chr3  |
| 7976488   | 1.698798 | 7.675772 | 5.752841 | 9.81E-05    | 0.003120722 | 1.554503 | chr14 |
| 7938608   | 1.686777 | 8.361185 | 6.191014 | 5.05E-05    | 0.002056005 | 2.223278 | chr11 |
| 7901272   | 1.670968 | 6.186924 | 9.93198  | 4.51E-07    | 0.000186701 | 6.870474 | chr1  |
| 7930872   | 1.670328 | 9.17367  | 10.02268 | 4.09E-07    | 0.000180817 | 6.962692 | chr10 |
| 8116835   | 1.651477 | 6.481481 | 10.5557  | 2.35E-07    | 0.000148044 | 7.488249 | chr6  |
| 8090690   | 1.649577 | 7.561709 | 6.271586 | 4.48E-05    | 0.00192062  | 2.343159 | chr3  |
| 8023710   | 1.634706 | 8.483643 | 9.099676 | 1.13E-06    | 0.000267814 | 5.984115 | chr18 |
| 7903188   | 1.632307 | 8.729704 | 12.10963 | 5.30E-08    | 6.59E-05    | 8.874394 | chr1  |
| 8149097   | 1.623958 | 6.961557 | 8.63389  | 1.95E-06    | 0.000355559 | 5.454608 | chr8  |
| 8086607   | 1.592688 | 10.79677 | 6.885259 | 1.86E-05    | 0.001179611 | 3.225113 | chr3  |
| 8071036   | 1.574787 | 8.571235 | 5.887463 | 7.97E-05    | 0.002743238 | 1.763003 | chr21 |
| 7987405   | 1.567613 | 6.999293 | 6.907504 | 1.80E-05    | 0.001158644 | 3.256064 | chr15 |
| 8180266   | 1.561609 | 8.557933 | 8.66655  | 1.87E-06    | 0.000348402 | 5.49256  | ---   |
| 8095688   | 1.553041 | 8.743563 | 5.980356 | 6.92E-05    | 0.002505184 | 1.905308 | chr4  |
| 7912937   | 1.541896 | 10.47745 | 7.908201 | 4.76E-06    | 0.000553373 | 4.577745 | chr1  |
| 8171472   | 1.532892 | 8.532835 | 6.209441 | 4.91E-05    | 0.002017026 | 2.250779 | chrX  |
| 8064859   | 1.530921 | 7.791745 | 6.245011 | 4.66E-05    | 0.001974671 | 2.303725 | chr20 |
| 8166747   | 1.528462 | 6.535941 | 5.658784 | 0.00011352  | 0.003404973 | 1.407235 | chrX  |
| 8180086   | 1.52487  | 8.249703 | 7.239585 | 1.14E-05    | 0.000915681 | 3.709822 | chr6  |
| 8152512   | 1.512999 | 8.99908  | 4.838614 | 0.000428096 | 0.007690286 | 0.068688 | chr8  |
| 8013450   | 1.510314 | 8.131064 | 6.402102 | 3.70E-05    | 0.001727601 | 2.535325 | chr17 |
| 7993638   | 1.507289 | 8.972171 | 7.325471 | 1.02E-05    | 0.000862168 | 3.824683 | chr16 |
| 8111490   | 1.506126 | 6.939191 | 6.478608 | 3.31E-05    | 0.001636732 | 2.646805 | chr5  |
| 8084589   | 1.505202 | 7.243854 | 6.230359 | 4.76E-05    | 0.001982675 | 2.281939 | chr3  |
| 8079931   | 1.503944 | 7.482036 | 8.312454 | 2.87E-06    | 0.000436241 | 5.074251 | chr3  |
| 8022666   | 1.500561 | 7.853625 | 7.638433 | 6.73E-06    | 0.000693556 | 4.234737 | chr18 |
| 7903920   | 1.496986 | 6.764592 | 7.685906 | 6.33E-06    | 0.000665892 | 4.295792 | chr1  |
| 8168749   | 1.495665 | 9.643894 | 6.508396 | 3.17E-05    | 0.001591497 | 2.68998  | chrX  |
| 7977046   | 1.469415 | 10.02729 | 10.58434 | 2.29E-07    | 0.000148044 | 7.515721 | chr14 |

|         |          |          |          |             |             |          |       |
|---------|----------|----------|----------|-------------|-------------|----------|-------|
| 7917561 | 1.444997 | 5.93612  | 8.146098 | 3.53E-06    | 0.000457104 | 4.872427 | chr1  |
| 8083887 | 1.443928 | 10.8173  | 11.24798 | 1.19E-07    | 0.000105233 | 8.131297 | chr3  |
| 7914974 | 1.440861 | 7.3527   | 5.08365  | 0.000285121 | 0.005955503 | 0.478593 | chr1  |
| 8142981 | 1.436332 | 10.556   | 9.40313  | 8.03E-07    | 0.000229616 | 6.315883 | chr7  |
| 8091972 | 1.428531 | 6.993783 | 8.263521 | 3.05E-06    | 0.000448602 | 5.015242 | chr3  |
| 7943413 | 1.428381 | 8.735168 | 6.269401 | 4.49E-05    | 0.001921159 | 2.339921 | chr11 |
| 8094550 | 1.427476 | 8.174822 | 5.675478 | 0.000110603 | 0.003347545 | 1.43347  | chr4  |
| 8070467 | 1.426882 | 8.680849 | 6.582632 | 2.85E-05    | 0.001526657 | 2.797016 | chr21 |
| 8115147 | 1.419673 | 10.74789 | 10.24742 | 3.23E-07    | 0.000163863 | 7.187646 | chr5  |
| 8152606 | 1.412727 | 8.362478 | 7.595529 | 7.12E-06    | 0.000711347 | 4.179301 | chr8  |
| 7991335 | 1.390666 | 11.81957 | 16.96824 | 1.22E-09    | 8.09E-06    | 12.133   | chr15 |
| 7940775 | 1.379176 | 9.953197 | 9.037784 | 1.21E-06    | 0.000277615 | 5.91519  | chr11 |
| 8026490 | 1.370133 | 11.27436 | 8.38559  | 2.63E-06    | 0.00041153  | 5.161896 | chr19 |
| 8128991 | 1.365443 | 7.490051 | 6.77659  | 2.16E-05    | 0.001283424 | 3.072904 | chr6  |
| 8082846 | 1.364914 | 6.914606 | 8.672266 | 1.86E-06    | 0.000348402 | 5.499189 | chr3  |
| 8162216 | 1.333501 | 7.739095 | 5.275478 | 0.000208632 | 0.005004663 | 0.793642 | chr9  |
| 8129637 | 1.332769 | 5.115476 | 5.212965 | 0.000230856 | 0.005264408 | 0.691549 | chr6  |
| 8136709 | 1.331693 | 10.15765 | 5.720795 | 0.000103076 | 0.003210039 | 1.504475 | chr7  |
| 8155083 | 1.320525 | 8.888745 | 5.506945 | 0.000144111 | 0.003993013 | 1.166744 | chr9  |
| 7919984 | 1.312679 | 9.531296 | 5.176705 | 0.000244877 | 0.005477385 | 0.632075 | chr1  |
| 8104035 | 1.309606 | 8.918934 | 7.195893 | 1.21E-05    | 0.00094142  | 3.651    | chr4  |
| 8132167 | 1.299966 | 5.459854 | 4.782027 | 0.000470774 | 0.008246875 | -0.02713 | chr7  |
| 7960529 | 1.287313 | 9.84481  | 9.704342 | 5.76E-07    | 0.000191225 | 6.635342 | chr12 |
| 7917532 | 1.284094 | 8.40027  | 6.128195 | 5.54E-05    | 0.0021862   | 2.129145 | chr1  |
| 8005809 | 1.27586  | 6.071969 | 7.22739  | 1.16E-05    | 0.000923437 | 3.693431 | chr17 |
| 8113709 | 1.268807 | 9.296383 | 6.117037 | 5.63E-05    | 0.002207521 | 2.112364 | chr5  |
| 7991138 | 1.267344 | 8.449974 | 5.296814 | 0.000201573 | 0.00488912  | 0.828357 | chr15 |
| 7939839 | 1.262525 | 9.122347 | 6.415756 | 3.63E-05    | 0.001712193 | 2.555283 | chr11 |
| 8025601 | 1.246539 | 10.79685 | 4.994766 | 0.000330096 | 0.006511862 | 0.330857 | chr19 |
| 7988444 | 1.245976 | 7.645916 | 4.990467 | 0.000332452 | 0.006521568 | 0.323683 | chr15 |
| 8099834 | 1.244162 | 8.173675 | 6.559424 | 2.94E-05    | 0.00154914  | 2.763639 | chr4  |
| 8009502 | 1.239247 | 6.576053 | 7.93093  | 4.62E-06    | 0.000544005 | 4.606211 | chr17 |
| 8006433 | 1.235481 | 10.84459 | 5.813216 | 8.94E-05    | 0.002956487 | 1.648342 | chr17 |
| 8141094 | 1.23484  | 8.340022 | 6.651346 | 2.58E-05    | 0.001432234 | 2.895377 | chr7  |
| 8129618 | 1.232091 | 6.523337 | 7.551615 | 7.54E-06    | 0.000727834 | 4.122306 | chr6  |
| 8088560 | 1.228216 | 6.957342 | 6.93824  | 1.72E-05    | 0.001136727 | 3.298713 | chr3  |
| 7969533 | 1.22104  | 7.141203 | 5.238097 | 0.000221635 | 0.005166728 | 0.73266  | chr13 |
| 7955297 | 1.213572 | 8.632304 | 5.503284 | 0.000144948 | 0.003993013 | 1.160904 | chr12 |
| 8140840 | 1.201672 | 8.885068 | 6.801285 | 2.09E-05    | 0.001254587 | 3.10764  | chr7  |
| 8083978 | 1.200714 | 8.357402 | 5.930214 | 7.47E-05    | 0.002652629 | 1.828653 | chr3  |
| 8139500 | 1.196168 | 9.624031 | 9.010594 | 1.25E-06    | 0.000280012 | 5.884774 | chr7  |
| 8170179 | 1.192593 | 9.358933 | 6.940912 | 1.72E-05    | 0.001136727 | 3.302414 | chrX  |
| 8145293 | 1.18508  | 6.357871 | 4.953241 | 0.000353607 | 0.006798974 | 0.261462 | chr8  |
| 8071861 | 1.184065 | 8.398218 | 5.706056 | 0.000105463 | 0.003256413 | 1.481414 | chr22 |
| 8027002 | 1.183671 | 8.79194  | 6.833687 | 2.00E-05    | 0.001228521 | 3.153087 | chr19 |
| 8139840 | 1.17652  | 9.03416  | 5.341848 | 0.000187487 | 0.004666067 | 0.901419 | chr7  |
| 8169504 | 1.173941 | 11.50927 | 5.776192 | 9.46E-05    | 0.003078913 | 1.590861 | chrX  |
| 8006865 | 1.172774 | 8.142162 | 5.379718 | 0.000176446 | 0.004486738 | 0.962631 | chr17 |
| 8039144 | 1.172024 | 8.356293 | 5.413952 | 0.000167055 | 0.004327716 | 1.017784 | chr19 |
| 8138728 | 1.167532 | 9.127239 | 6.700224 | 2.41E-05    | 0.001391057 | 2.964927 | chr7  |
| 8094789 | 1.163177 | 8.914169 | 5.235534 | 0.000222558 | 0.005168077 | 0.728471 | chr4  |
| 8140971 | 1.159788 | 8.582898 | 5.43101  | 0.000162574 | 0.004259255 | 1.045203 | chr7  |

|         |          |          |          |             |             |          |       |
|---------|----------|----------|----------|-------------|-------------|----------|-------|
| 8123246 | 1.151892 | 6.545446 | 9.72439  | 5.64E-07    | 0.000191225 | 6.656264 | chr6  |
| 7969574 | 1.149569 | 11.11947 | 9.215312 | 9.92E-07    | 0.00024962  | 6.111739 | chr13 |
| 8070584 | 1.148676 | 8.2845   | 6.06144  | 6.12E-05    | 0.00231977  | 2.028474 | chr21 |
| 8095697 | 1.148226 | 10.31092 | 6.184218 | 5.10E-05    | 0.002072642 | 2.213122 | chr4  |
| 8001394 | 1.141246 | 7.942782 | 5.218576 | 0.000228763 | 0.00524072  | 0.700735 | chr16 |
| 7937612 | 1.140664 | 8.662457 | 5.308815 | 0.000197714 | 0.004840032 | 0.847857 | chr11 |
| 7902541 | 1.1389   | 5.564886 | 8.680492 | 1.84E-06    | 0.000348402 | 5.508722 | chr1  |
| 8072735 | 1.138148 | 7.289159 | 6.638839 | 2.63E-05    | 0.001443769 | 2.877524 | chr22 |
| 8133770 | 1.13354  | 6.095989 | 5.896035 | 7.87E-05    | 0.002726405 | 1.776189 | chr7  |
| 8138466 | 1.129178 | 10.5702  | 5.538817 | 0.000137034 | 0.003887194 | 1.217507 | chr7  |
| 7988876 | 1.125971 | 8.078327 | 5.928121 | 7.49E-05    | 0.002656351 | 1.825446 | chr15 |
| 8154725 | 1.110415 | 10.81208 | 6.880899 | 1.87E-05    | 0.001183024 | 3.219039 | chr9  |
| 7978706 | 1.108885 | 7.963538 | 4.863782 | 0.000410436 | 0.007489033 | 0.111166 | chr14 |
| 7981142 | 1.107063 | 9.743073 | 10.93771 | 1.60E-07    | 0.000122706 | 7.848409 | chr14 |
| 7946757 | 1.100358 | 7.698307 | 7.6216   | 6.88E-06    | 0.000700253 | 4.213017 | chr11 |
| 8091715 | 1.090282 | 8.614539 | 6.640534 | 2.62E-05    | 0.001443769 | 2.879945 | chr3  |
| 7942453 | 1.088899 | 9.414443 | 5.924845 | 7.53E-05    | 0.00266016  | 1.820422 | chr11 |
| 7990138 | 1.085958 | 8.381109 | 6.55361  | 2.97E-05    | 0.001558018 | 2.755266 | chr15 |
| 8016387 | 1.08333  | 7.041281 | 6.537988 | 3.04E-05    | 0.001570407 | 2.732743 | chr17 |
| 7926127 | 1.065173 | 7.715061 | 8.419973 | 2.52E-06    | 0.000409348 | 5.202874 | chr10 |
| 8114010 | 1.063337 | 8.270921 | 7.232073 | 1.15E-05    | 0.000921299 | 3.699728 | chr5  |
| 8134351 | 1.062276 | 6.815402 | 6.530178 | 3.07E-05    | 0.001574077 | 2.721469 | chr7  |
| 8097957 | 1.062047 | 9.587138 | 12.48925 | 3.77E-08    | 5.36E-05    | 9.183151 | chr4  |
| 8086125 | 1.055671 | 6.970585 | 5.13114  | 0.000263778 | 0.005704529 | 0.557074 | chr3  |
| 7920642 | 1.054248 | 10.37156 | 7.169863 | 1.26E-05    | 0.000955    | 3.615831 | chr1  |
| 8020495 | 1.052487 | 7.955041 | 10.06636 | 3.91E-07    | 0.000180676 | 7.0068   | chr18 |
| 8158771 | 1.047226 | 8.387567 | 7.855065 | 5.09E-06    | 0.000581895 | 4.510934 | chr9  |
| 7901175 | 1.044057 | 9.946444 | 6.199213 | 4.98E-05    | 0.002039462 | 2.235522 | chr1  |
| 7915910 | 1.043128 | 9.609086 | 5.91906  | 7.60E-05    | 0.002678955 | 1.811551 | chr1  |
| 7903786 | 1.042943 | 9.671158 | 6.682967 | 2.47E-05    | 0.001392091 | 2.94041  | chr1  |
| 8146986 | 1.042923 | 5.167095 | 5.67169  | 0.000111258 | 0.003352632 | 1.42752  | chr8  |
| 8018966 | 1.042458 | 10.20709 | 5.780225 | 9.40E-05    | 0.003069851 | 1.597132 | chr17 |
| 7942332 | 1.038191 | 9.741441 | 8.190047 | 3.34E-06    | 0.000457104 | 4.926081 | chr11 |
| 8108873 | 1.037299 | 9.688955 | 9.223627 | 9.82E-07    | 0.00024962  | 6.12086  | chr5  |
| 7946977 | 1.028316 | 7.832468 | 5.66112  | 0.000113107 | 0.003402624 | 1.41091  | chr11 |
| 8014008 | 1.018326 | 7.452267 | 5.122417 | 0.000267569 | 0.005721084 | 0.542682 | chr17 |
| 8113214 | 1.012253 | 8.270879 | 5.559975 | 0.00013254  | 0.003797659 | 1.251121 | chr5  |
| 8023727 | 1.011021 | 7.681597 | 7.728511 | 5.99E-06    | 0.000647318 | 4.350333 | chr18 |
| 8140650 | 1.009065 | 7.684349 | 9.07251  | 1.17E-06    | 0.000273033 | 5.953916 | chr7  |
| 8113073 | 1.005878 | 10.62302 | 10.50594 | 2.47E-07    | 0.000148044 | 7.440339 | chr5  |
| 8140140 | 1.004457 | 10.71003 | 8.420322 | 2.52E-06    | 0.000409348 | 5.203289 | chr7  |
| 7961540 | 1.0041   | 8.777092 | 5.473795 | 0.000151883 | 0.004093793 | 1.113788 | chr12 |
| 7915787 | 1.00131  | 9.526786 | 6.657418 | 2.56E-05    | 0.001425735 | 2.904035 | chr1  |
| 8077786 | 1.000903 | 7.528747 | 6.010475 | 6.61E-05    | 0.002444557 | 1.951172 | chr3  |
| 7991546 | -1.00105 | 9.864161 | -6.51649 | 3.13E-05    | 0.001589062 | 2.701692 | chr15 |
| 8138527 | -1.00428 | 7.707925 | -6.0241  | 6.48E-05    | 0.002408195 | 1.971872 | chr7  |
| 7931097 | -1.01249 | 9.865746 | -8.75324 | 1.69E-06    | 0.000343429 | 5.592686 | chr10 |
| 7965226 | -1.04565 | 7.028784 | -6.59819 | 2.79E-05    | 0.001501087 | 2.819351 | chr12 |
| 7967318 | -1.0494  | 5.895013 | -4.82652 | 0.00043686  | 0.007819051 | 0.048253 | chr12 |
| 7964484 | -1.0803  | 8.600561 | -5.5553  | 0.000133518 | 0.003820161 | 1.243706 | chr12 |
| 8068583 | -1.09879 | 7.124322 | -7.07373 | 1.43E-05    | 0.0010209   | 3.485131 | chr21 |
| 8050240 | -1.12536 | 11.29691 | -6.82682 | 2.01E-05    | 0.00123276  | 3.143475 | chr2  |

|         |          |          |          |             |             |          |       |
|---------|----------|----------|----------|-------------|-------------|----------|-------|
| 8059413 | -1.13238 | 8.066551 | -6.56358 | 2.93E-05    | 0.00154914  | 2.769622 | chr2  |
| 8053059 | -1.13782 | 10.8972  | -22.9298 | 3.88E-11    | 7.72E-07    | 14.69279 | chr2  |
| 8109752 | -1.14071 | 10.14761 | -5.52897 | 0.000139181 | 0.003909048 | 1.201839 | chr5  |
| 8022728 | -1.16154 | 7.201697 | -5.05922 | 0.000296802 | 0.006091085 | 0.438094 | chr18 |
| 8147079 | -1.17135 | 9.359107 | -18.9218 | 3.53E-10    | 3.51E-06    | 13.1074  | chr8  |
| 8130116 | -1.17974 | 8.764098 | -12.5397 | 3.61E-08    | 5.36E-05    | 9.223397 | chr6  |
| 8115144 | -1.18695 | 9.003844 | -7.50118 | 8.06E-06    | 0.000746077 | 4.056532 | chr5  |
| 8136807 | -1.18918 | 8.536291 | -6.27463 | 4.46E-05    | 0.00192062  | 2.347674 | --    |
| 7950743 | -1.19358 | 7.884352 | -7.15394 | 1.28E-05    | 0.000959613 | 3.594264 | chr11 |
| 8012220 | -1.20685 | 8.793544 | -8.37748 | 2.65E-06    | 0.000412369 | 5.152206 | chr17 |
| 8166784 | -1.2087  | 8.607988 | -6.51927 | 3.12E-05    | 0.001586752 | 2.70571  | chrX  |
| 7977933 | -1.21295 | 9.943249 | -9.02604 | 1.23E-06    | 0.000278198 | 5.902059 | chr14 |
| 8129134 | -1.30927 | 8.928754 | -6.46589 | 3.37E-05    | 0.001663035 | 2.628328 | chr6  |
| 7950899 | -1.31081 | 10.07621 | -8.28003 | 2.99E-06    | 0.000443782 | 5.035188 | chr11 |
| 7964733 | -1.32612 | 6.602495 | -6.79708 | 2.10E-05    | 0.001254737 | 3.101736 | chr12 |
| 7946334 | -1.33939 | 6.12418  | -5.72705 | 0.00010208  | 0.003206744 | 1.514255 | chr11 |
| 8082058 | -1.35989 | 8.260798 | -6.24043 | 4.69E-05    | 0.001974676 | 2.296924 | chr3  |
| 7989501 | -1.39664 | 10.05547 | -9.03979 | 1.21E-06    | 0.000277615 | 5.91743  | chr15 |
| 7971150 | -1.44383 | 9.885984 | -11.1765 | 1.27E-07    | 0.000105233 | 8.066902 | chr13 |
| 7948420 | -1.45571 | 8.381133 | -5.37518 | 0.000177732 | 0.004494655 | 0.955307 | chr11 |
| 8094988 | -1.51284 | 5.848888 | -5.13114 | 0.00026378  | 0.005704529 | 0.557066 | chr4  |
| 7953775 | -1.60801 | 7.744061 | -4.75874 | 0.000489613 | 0.008486091 | -0.06668 | chr12 |
| 7976567 | -1.66639 | 8.865008 | -6.79691 | 2.10E-05    | 0.001254737 | 3.101497 | chr14 |
| 7970441 | -1.70493 | 9.376862 | -5.67798 | 0.000110172 | 0.003339596 | 1.4374   | chr13 |
| 7943197 | -1.76704 | 8.088709 | -4.73477 | 0.000509828 | 0.008739603 | -0.10747 | chr11 |
| 8054722 | -2.04413 | 8.787572 | -4.87588 | 0.000402219 | 0.007426291 | 0.131561 | chr2  |
| 8054712 | -2.78562 | 8.879776 | -7.52823 | 7.78E-06    | 0.000736237 | 4.091846 | chr2  |



| start    | end      | strand | geneID   | genename  | geneDescr    | mRNAid       |
|----------|----------|--------|----------|-----------|--------------|--------------|
| 1.49E+08 | 1.49E+08 | -      | NM_00009 | CP        | ceruloplasr  | NM_000096    |
| 32407701 | 32411702 | +      | NM_01911 | HLA-DRA   | major histc  | NM_019111    |
| 1.23E+08 | 1.23E+08 | +      | NM_00144 | FABP7     | fatty acid b | NM_001446    |
| 77747662 | 78025654 | +      | NM_17485 | AK5       | adenylate k  | NM_174858    |
| 1.33E+08 | 1.33E+08 | +      | NM_00106 | TF        | transferrin  | NM_001063    |
| 55524075 | 55606881 | +      | NM_00022 | KIT       | v-kit Hardy  | NM_000222    |
| 1.22E+08 | 1.22E+08 | -      | NM_02487 | TNIP3     | TNFAIP3 in   | NM_024873    |
| 1.49E+08 | 1.49E+08 | -      | NM_13878 | TM4SF18   | transmemt    | NM_138786    |
| 93388199 | 93392858 | -      | NM_00539 | PPP1R3C   | protein ph   | NM_005398    |
| 1.24E+08 | 1.24E+08 | +      | NM_00732 | DMBT1     | deleted in r | NM_007329    |
| 92671853 | 92681033 | -      | NM_01439 | ANKRD1    | ankyrin rep  | NM_014391    |
| 1.16E+08 | 1.16E+08 | +      | NM_02488 | C10orf81  | chromosom    | NM_024889    |
| 15163015 | 15166900 | +      | NM_01211 | CASP14    | caspase 14,  | NM_012114    |
| 17360694 | 17496329 | -      | NM_00100 | ST8SIA6   | ST8 alpha-1  | NM_001004470 |
| 1.18E+08 | 1.18E+08 | -      | NM_00511 | TNFSF15   | tumor necr   | NM_005118    |
| 2.18E+08 | 2.18E+08 | -      | NM_00059 | IGFBP5    | insulin-like | NM_000599    |
| 84011215 | 84035911 | -      | NM_01661 | PLAC8     | placenta-sp  | NM_016619    |
| 1.13E+08 | 1.13E+08 | +      | NM_18135 | NCAM1     | neural cell  | NM_181351    |
| 47846039 | 47847581 | -      | NM_00101 | C6orf138  | chromosom    | NM_001013732 |
| 85857905 | 86153461 | -      | NM_17493 | FRMD3     | FERM dom     | NM_174938    |
| 1.14E+08 | 1.14E+08 | +      | NM_01623 | ACSL5     | acyl-CoA sy  | NM_016234    |
| 18389434 | 18480204 | -      | NM_00297 | SATB1     | SATB home    | NM_002971    |
| 95047811 | 95059452 | +      | NM_00062 | SERPINA5  | serpin pept  | NM_000624    |
| 13983914 | 14289656 | +      | NM_00610 | SPON1     | spondin 1,   | NM_006108    |
| 47489240 | 47516423 | +      | NM_17803 | CYP4X1    | cytochrom    | NM_178033    |
| 1.21E+08 | 1.21E+08 | +      | NM_19946 | NANOS1    | nanos hom    | NM_199461    |
| 10528589 | 10629601 | +      | NM_14564 | GCNT2     | glucosamin   | NM_145649    |
| 1.31E+08 | 1.32E+08 | -      | NM_13080 | CPNE4     | copine IV    | NM_130808    |
| 64171321 | 64271409 | -      | NM_02115 | CDH19     | cadherin 1   | NM_021153    |
| 97187339 | 97280349 | +      | NM_02119 | PTBP2     | polypyrimi   | NM_021190    |
| 6728085  | 6735529  | -      | NM_00521 | DEFB1     | defensin, b  | NM_005218    |
| 46477496 | 46506653 | -      | NM_00234 | LTF       | lactotransf  | NM_002343    |
| 48018531 | 48025035 | -      | NM_00627 | S100B     | S100 calci   | NM_006272    |
| 38780298 | 38856932 | -      | NM_00573 | RASGRP1   | RAS guanyl   | NM_005739    |
| 0        | 0        | ---    | ---      | NA        | NA           | NM_030965.1  |
| 74702382 | 74704477 | +      | NM_00299 | CXCL6     | chemokine    | NM_002993    |
| 17393256 | 17445930 | -      | NM_00736 | PADI2     | peptidyl ar  | NM_007365    |
| 15645441 | 15683154 | -      | NM_02066 | TMEM27    | transmemt    | NM_020665    |
| 5282622  | 5295059  | -      | NM_14477 | PROKR2    | prokinetici  | NM_144773    |
| 37865835 | 37988069 | +      | NM_13878 | SYTL5     | synaptotag   | NM_138780    |
| 32916395 | 32920868 | -      | NM_00612 | HLA-DMA   | major histc  | NM_006120    |
| 1.2E+08  | 1.2E+08  | -      | NM_00254 | TNFRSF11B | tumor necr   | NM_002546    |
| 20353163 | 20370848 | -      | NM_00104 | LGALS9B   | lectin, gala | NM_001042685 |
| 19422057 | 19510432 | +      | NM_00110 | TMC5      | transmemt    | NM_001105248 |
| 35048848 | 35230577 | -      | NM_00094 | PRLR      | prolactin r  | NM_000949    |
| 1.85E+08 | 1.85E+08 | +      | NM_00472 | MAP3K13   | mitogen-ac   | NM_004721    |
| 50242699 | 50258406 | +      | NM_00684 | SLC38A3   | solute carri | NM_006841    |
| 24495590 | 24765281 | -      | NM_03142 | CHST9     | carbohydr    | NM_031422    |
| 1.12E+08 | 1.12E+08 | +      | NM_00102 | CHI3L2    | chitinase 3  | NM_001025199 |
| 99899215 | 99926296 | +      | NM_01446 | SRPX2     | sushi-repea  | NM_014467    |
| 1.04E+08 | 1.04E+08 | +      | NM_00629 | TNFAIP2   | tumor necr   | NM_006291    |

|          |          |   |          |          |               |              |
|----------|----------|---|----------|----------|---------------|--------------|
| 89646831 | 89664615 | - | NM_05294 | GBP4     | guanylate k   | NM_052941    |
| 1.7E+08  | 1.7E+08  | + | NM_00560 | CLDN11   | claudin 11    | NM_005602    |
| 37261128 | 37499844 | - | NM_00083 | GRIK3    | glutamate r   | NM_000831    |
| 1.31E+08 | 1.31E+08 | - | NM_00101 | PODXL    | podocalyxin   | NM_001018111 |
| 1.69E+08 | 1.69E+08 | - | NM_00110 | MECOM    | MDS1 and f    | NM_001105077 |
| 1.02E+08 | 1.02E+08 | + | NM_00116 | BIRC3    | baculoviral   | NM_001165    |
| 37455563 | 37593846 | + | NM_00110 | C4orf19  | chromosom     | NM_001104629 |
| 42836478 | 42880078 | - | NM_00113 | TMPRSS2  | transmemk     | NM_001135099 |
| 1.5E+08  | 1.5E+08  | - | NM_00102 | CD74     | CD74 mole     | NM_001025159 |
| 1.22E+08 | 1.22E+08 | - | NM_02102 | SNTB1    | syntrophin    | NM_021021    |
| 90328126 | 90358068 | - | NM_00115 | ANPEP    | alanyl (men   | NM_001150    |
| 63304280 | 63313930 | + | NM_00458 | RARRES3  | retinoic aci  | NM_004585    |
| 15939809 | 15946165 | + | NR_01537 | UCA1     | urothelial c  | NR_015379    |
| 1.12E+08 | 1.13E+08 | - | NM_00110 | LAMA4    | laminin, al   | NM_001105206 |
| 1.35E+08 | 1.35E+08 | + | NM_00444 | EPHB1    | EPH recept    | NM_004441    |
| 91628030 | 91793682 | - | NM_01684 | SHC3     | SHC (Src ho   | NM_016848    |
| 1.33E+08 | 1.33E+08 | - | NM_00466 | VNN2     | vanin 2       | NM_004665    |
| 1.42E+08 | 1.42E+08 | + | NR_00371 | LOC93432 | maltase-glu   | NR_003715    |
| 35673853 | 35681156 | + | NM_00121 | CA9      | carbonic ar   | NM_001216    |
| 1.51E+08 | 1.51E+08 | - | NM_00394 | SELENBP1 | selenium bi   | NM_003944    |
| 1.87E+08 | 1.87E+08 | - | NM_02106 | SORBS2   | sorbin and    | NM_021069    |
| 31556978 | 31693303 | + | NM_19430 | CCDC129  | coiled-coil   | NM_194300    |
| 6456013  | 6484715  | - | NM_00103 | SCNN1A   | sodium cha    | NM_001038    |
| 89573310 | 89591799 | - | NM_00412 | GBP2     | guanylate k   | NM_004120    |
| 25956824 | 25976586 | + | NM_00958 | LGALS9   | lectin, gala  | NM_009587    |
| 1.21E+08 | 1.21E+08 | - | NM_00231 | LOX      | lysyl oxidas  | NM_002317    |
| 85198360 | 85201802 | - | NM_02107 | NMB      | neuromedi     | NM_021077    |
| 48002113 | 48189670 | + | NM_00284 | PTPRJ    | protein tyr   | NM_002843    |
| 10381764 | 10397291 | + | NM_00020 | ICAM1    | intercellul   | NM_000201    |
| 48432427 | 48470513 | - | NM_01613 | MYEF2    | myelin exp    | NM_016132    |
| 38797876 | 38806412 | - | NM_00326 | TLR1     | toll-like rec | NM_003263    |
| 68165676 | 68176444 | + | NM_00089 | KCNJ2    | potassium i   | NM_000891    |
| 32582296 | 32584222 | + | NM_00298 | CCL2     | chemokine     | NM_002982    |
| 95212809 | 95225925 | - | NM_00261 | PDK4     | pyruvate d    | NM_002612    |
| 1.33E+08 | 1.33E+08 | - | NM_00466 | VNN1     | vanin 1       | NM_004666    |
| 64501333 | 64673365 | - | NM_18292 | ADAMTS9  | ADAM met      | NM_182920    |
| 78272049 | 78338377 | + | NM_00104 | SLAIN1   | SLAIN moti    | NM_001040153 |
| 50355279 | 50359461 | + | NM_00165 | AQP5     | aquaporin     | NM_001651    |
| 87905744 | 87936209 | - | NM_02463 | STEAP4   | STEAP famil   | NM_024636    |
| 1.75E+08 | 1.76E+08 | + | NM_20701 | NAALADL2 | N-acetylate   | NM_207015    |
| 47314752 | 47621691 | - | NM_02274 | TNS3     | tensin 3      | NM_022748    |
| 1.36E+08 | 1.36E+08 | + | NM_01626 | VGLL1    | vestigial lik | NM_016267    |
| 24151580 | 24212726 | + | NM_01426 | ADAM28   | ADAM met      | NM_014265    |
| 24577425 | 24585074 | + | NM_01960 | SUSD2    | sushi doma    | NM_019601    |
| 18496968 | 18499987 | + | NM_00486 | GDF15    | growth diff   | NM_004864    |
| 64451590 | 64453404 | - | NM_00100 | ERV3     | endogenou     | NM_001007253 |
| 1.16E+08 | 1.16E+08 | + | NM_00723 | SLC6A14  | solute carri  | NM_007231    |
| 37783179 | 37792878 | + | NM_03219 | PPP1R1B  | protein ph    | NM_032192    |
| 54663846 | 54676944 | - | NM_00114 | TMC4     | transmemk     | NM_001145303 |
| 27168010 | 27170399 | - | NM_00214 | HOXA4    | homeobox      | NM_002141    |
| 41361624 | 41701010 | + | NM_01498 | LIMCH1   | LIM and cal   | NM_014988    |
| 92759368 | 92777680 | - | NM_15270 | SAMD9L   | sterile alph  | NM_152703    |

|          |          |   |          |          |              |              |
|----------|----------|---|----------|----------|--------------|--------------|
| 1.61E+08 | 1.61E+08 | + | NM_02197 | SLC22A3  | solute carri | NM_021977    |
| 90883436 | 90883531 | + | NR_03075 | MIR622   | microRNA     | NR_030754    |
| 43791946 | 43816955 | - | NM_02402 | TMPRSS3  | transmembr   | NM_024022    |
| 74735109 | 74749385 | + | NM_00151 | CXCL1    | chemokine    | NM_001511    |
| 52471925 | 52580635 | - | NM_00108 | TOX3     | TOX high m   | NM_001080430 |
| 1212787  | 1282838  | + | NM_00245 | MUC5B    | mucin 5B, c  | NM_002458    |
| 79086116 | 79108484 | + | NM_00682 | IFI44L   | interferon-i | NM_006820    |
| 36649112 | 36663577 | + | NM_14534 | APOL1    | apolipopro   | NM_145343    |
| 76751934 | 76924525 | + | NM_02087 | CCDC146  | coiled-coil  | NM_020879    |
| 20180251 | 20257013 | - | NM_18276 | MACC1    | metastasis   | NM_182762    |
| 52484519 | 52587941 | - | NM_01872 | MYO5C    | myosin VC    | NM_018728    |
| 30774227 | 30774329 | + | NM_00022 | KRT18    | keratin 18   | NM_000224    |
| 38059187 | 38064625 | - | NM_00449 | FOXA1    | forkhead b   | NM_004496    |
| 95657864 | 95786202 | - | NM_02473 | CLMN     | calmin (cal  | NM_024734    |
| 15991795 | 16497918 | - | NM_01750 | SOX6     | SRY (sex det | NM_017508    |
| 1.58E+08 | 1.58E+08 | - | NM_02016 | LXN      | latexin      | NM_020169    |
| 73357223 | 73373864 | + | NM_02120 | PLEKHB1  | pleckstrin   | NM_021200    |
| 72452148 | 72490126 | - | NM_00101 | GRAMD2   | GRAM dom     | NM_001012642 |
| 46029333 | 46035110 | - | NM_02432 | PRR15L   | proline rich | NM_024320    |
| 11047284 | 11378674 | + | NM_00102 | CELF2    | CUGBP, Ela   | NM_001025077 |
| 1.32E+08 | 1.32E+08 | - | NM_00219 | IRF1     | interferon   | NM_002198    |
| 94536949 | 94925727 | + | NM_00116 | PPP1R9A  | protein ph   | NM_001166160 |
| 1.57E+08 | 1.57E+08 | + | NM_00085 | GUCY1A3  | guanylate c  | NM_000856    |
| 36868311 | 36900374 | - | NM_01483 | TRANK1   | tetratricop  | NM_014831    |
| 1.55E+08 | 1.55E+08 | - | NM_00101 | MUC1     | mucin 1, c   | NM_001018016 |
| 20715727 | 20838617 | + | NM_13837 | CABLES1  | Cdk5 and A   | NM_138375    |
| 1.34E+08 | 1.34E+08 | + | NM_03142 | AIF1L    | allograft in | NM_031426    |
| 46640759 | 46651630 | + | NM_00572 | TSPAN1   | tetraspanin  | NM_005727    |
| 47649261 | 47656716 | - | NM_00576 | PDZK1IP1 | PDZK1 inte   | NM_005764    |
| 1.1E+08  | 1.1E+08  | + | NM_00075 | CSF1     | colony stir  | NM_000757    |
| 76320271 | 76479069 | + | NM_00413 | HNF4G    | hepatocyte   | NM_004133    |
| 76848609 | 76921472 | - | NM_00325 | TIMP2    | TIMP metal   | NM_003255    |
| 71900602 | 71907366 | + | NM_01672 | FOLR1    | folate rece  | NM_016724    |
| 1.42E+08 | 1.43E+08 | + | NM_01507 | ARHGAP26 | Rho GTPase   | NM_015071    |
| 18252903 | 18258334 | - | NM_00651 | SAA4     | serum amyl   | NM_006512    |
| 28575221 | 28619075 | - | NM_00038 | BLMH     | bleomycin    | NM_000386    |
| 95149553 | 95158709 | - | NM_00206 | GLRX     | glutaredoxi  | NM_002064    |
| 65173819 | 65184217 | - | NM_03216 | DSEL     | dermatan s   | NM_032160    |
| 82993222 | 83278324 | - | NM_01243 | SEMA3E   | sema doma    | NM_012431    |
| 90664541 | 90679121 | - | NM_02080 | ARRDC3   | arrestin do  | NM_020801    |
| 73183327 | 73184576 | - | NM_00130 | CLDN3    | claudin 3    | NM_001306    |
| 15260717 | 15374304 | - | NM_03291 | RERG     | RAS-like, es | NM_032918    |
| 46505812 | 46598467 | - | NM_00362 | PIK3R3   | phosphoin    | NM_003629    |
| 10206563 | 10285427 | + | NM_00157 | IRAK2    | interleukin  | NM_001570    |
| 1.01E+08 | 1.01E+08 | - | NM_17884 | LASS3    | LAG1 homc    | NM_178842    |
| 22459066 | 22539798 | - | NM_20734 | MGC87042 | STEAP famil  | NM_207342    |
| 1.24E+08 | 1.24E+08 | + | NM_00277 | HTRA1    | HtrA serine  | NM_002775    |
| 86198330 | 86230318 | - | NM_00544 | RASSF9   | Ras associa  | NM_005447    |
| 1.23E+08 | 1.23E+08 | - | NM_17755 | GPR109A  | G protein-c  | NM_177551    |
| 58017193 | 58026985 | - | NM_00147 | B4GALNT1 | beta-1,4-N   | NM_001478    |
| 39628664 | 39673748 | + | NM_00224 | KCNJ15   | potassium i  | NM_002243    |
| 10580094 | 10588630 | - | NM_00253 | ODC1     | ornithine d  | NM_002539    |

|          |          |     |          |         |               |              |
|----------|----------|-----|----------|---------|---------------|--------------|
| 2.26E+08 | 2.26E+08 | -   | NM_01468 | DOCK10  | dedicator c   | NM_014689    |
| 74362528 | 74375039 | -   | NM_21255 | BOLA3   | bolA homo     | NM_212552    |
| 1.67E+08 | 1.68E+08 | +   | AK302302 | ODZ2    | odz, odd O;   | AK302302     |
| 28709199 | 28742819 | -   | NM_02442 | DSC1    | desmocolli    | NM_024421    |
| 86019450 | 86058311 | +   | NM_03340 | LRRCC1  | leucine ric   | NM_033402    |
| 1.5E+08  | 1.5E+08  | -   | NM_00469 | LATS1   | LATS, large   | NM_004690    |
| 1.5E+08  | 1.5E+08  | -   | NM_00101 | ARSI    | arylsulfatas  | NM_001012301 |
| 0        | 0        | --- | NM_00277 | PRSS2   | protease, s   | NM_002770    |
| 82692478 | 82782895 | -   | NM_01448 | RAB30   | RAB30, mei    | NM_014488    |
| 7491496  | 7493494  | -   | NM_00694 | SOX15   | SRY (sex det  | NM_006942    |
| 38420609 | 38548174 | +   | NM_00461 | TSPAN7  | tetraspanin   | NM_004615    |
| 23594504 | 23652849 | -   | NM_01224 | SLC7A8  | solute carri  | NM_012244    |
| 1.18E+08 | 1.18E+08 | -   | NM_00294 | ROS1    | c-ros onco    | NM_002944    |
| 87846415 | 87908635 | -   | NM_02233 | RAB38   | RAB38, mei    | NM_022337    |
| 66151800 | 66220754 | -   | NR_02682 | RPSAP52 | ribosomal     | NR_026825    |
| 7980971  | 7985204  | -   | NM_17682 | NLRP10  | NLR family,   | NM_176821    |
| 1.22E+08 | 1.22E+08 | +   | NM_00521 | CSTA    | cystatin A    | (: NM_005213 |
| 63615730 | 63674075 | -   | NM_00121 | CA12    | carbonic ar   | NM_001218    |
| 39917029 | 40177356 | -   | NM_00578 | LHFP    | lipoma HM     | NM_005780    |
| 59548559 | 59549224 | -   | NM_00144 | FABP5   | fatty acid b  | NM_001444    |
| 48988264 | 49064096 | +   | NM_02508 | CWH43   | cell wall bic | NM_025087    |
| 8975217  | 9033171  | +   | NM_14467 | A2ML1   | alpha-2-ma    | NM_144670    |
| 96722559 | 96731100 | +   | NM_00071 | BDKRB1  | bradykinin    | NM_000710    |
| 20761609 | 20767055 | -   | NM_00400 | GJB2    | gap junctio   | NM_004004    |
| 93754544 | 93846917 | +   | NM_00109 | HEPHL1  | hephaestin    | NM_001098672 |
| 1.14E+08 | 1.14E+08 | -   | NM_00057 | IL1B    | interleukin   | NM_000576    |
| 1.14E+08 | 1.14E+08 | -   | NM_00057 | IL1A    | interleukin   | NM_000575    |

| Affyprobeset | logFC       | AveExpr  | t        | P.Value  | adj.P.Val | B        | chrom |
|--------------|-------------|----------|----------|----------|-----------|----------|-------|
| 7930760      | 3.462545408 | 6.92827  | 22.16527 | 3.21E-13 | 1.05E-10  | 20.6906  | chr10 |
| 7994058      | 3.416362511 | 7.144051 | 35.43987 | 2.43E-16 | 3.46E-13  | 27.49142 | chr16 |
| 7938652      | 3.033071469 | 6.211258 | 25.75605 | 3.27E-14 | 1.76E-11  | 22.92195 | chr11 |
| 8176234      | 2.924128413 | 6.70215  | 25.52087 | 3.77E-14 | 1.97E-11  | 22.7867  | chrX  |
| 7976496      | 2.683165257 | 8.668408 | 19.95331 | 1.57E-12 | 3.60E-10  | 19.11204 | chr14 |
| 7971150      | 2.6252099   | 8.185145 | 24.37806 | 7.57E-14 | 3.58E-11  | 22.1089  | chr13 |
| 8015366      | 2.574146578 | 8.974587 | 18.63445 | 4.39E-12 | 7.66E-10  | 18.08162 | chr17 |
| 8065071      | 2.389177105 | 6.912629 | 27.77136 | 1.03E-14 | 8.22E-12  | 24.02603 | chr20 |
| 8025402      | 2.356369321 | 9.728415 | 47.42575 | 2.68E-18 | 1.33E-14  | 31.31042 | chr19 |
| 8135069      | 2.305535566 | 9.951843 | 42.49479 | 1.47E-17 | 4.18E-14  | 29.92205 | chr7  |
| 8180352      | 2.295066296 | 7.437794 | 19.21954 | 2.76E-12 | 5.61E-10  | 18.54767 | ---   |
| 8109194      | 2.150146849 | 8.83712  | 30.16156 | 2.91E-15 | 3.05E-12  | 25.22014 | chr5  |
| 7965410      | 2.146878368 | 5.078618 | 11.20361 | 7.20E-09 | 3.57E-07  | 10.50409 | chr12 |
| 8059580      | 2.109688555 | 8.318168 | 42.96252 | 1.24E-17 | 4.18E-14  | 30.06349 | chr2  |
| 7944082      | 2.02447172  | 7.261786 | 16.7737  | 2.11E-11 | 2.64E-09  | 16.49534 | chr11 |
| 7968637      | 1.994235243 | 8.067734 | 19.80755 | 1.76E-12 | 3.86E-10  | 19.00166 | chr13 |
| 7925511      | 1.96562515  | 7.614241 | 18.80542 | 3.83E-12 | 7.12E-10  | 18.21933 | chr1  |
| 7997491      | 1.946449355 | 6.628695 | 18.52997 | 4.78E-12 | 8.19E-10  | 17.99683 | chr16 |
| 8062927      | 1.841139569 | 9.142226 | 16.57063 | 2.53E-11 | 3.06E-09  | 16.31182 | chr20 |
| 8040103      | 1.833987356 | 6.867623 | 8.76834  | 2.01E-07 | 5.53E-06  | 7.054167 | chr2  |
| 8064418      | 1.785472679 | 7.510201 | 26.15411 | 2.59E-14 | 1.47E-11  | 23.14771 | chr20 |
| 8083494      | 1.781425217 | 6.565887 | 14.79337 | 1.34E-10 | 1.25E-08  | 14.6069  | chr3  |
| 8058765      | 1.756495434 | 8.28003  | 19.09115 | 3.06E-12 | 6.02E-10  | 18.44665 | chr2  |
| 8041383      | 1.733829518 | 9.098152 | 17.54127 | 1.08E-11 | 1.56E-09  | 17.16988 | chr2  |
| 8047300      | 1.722673961 | 6.62107  | 15.53147 | 6.57E-11 | 6.76E-09  | 15.33738 | chr2  |
| 8153002      | 1.623528809 | 9.229818 | 16.7513  | 2.15E-11 | 2.67E-09  | 16.4752  | chr8  |
| 8035095      | 1.616302153 | 7.667298 | 18.751   | 4.00E-12 | 7.37E-10  | 18.17563 | chr19 |
| 8021635      | 1.575521963 | 7.037106 | 9.21513  | 1.04E-07 | 3.24E-06  | 7.736151 | chr18 |
| 7905553      | 1.573646141 | 7.929826 | 13.2034  | 7.00E-10 | 5.02E-08  | 12.91176 | chr1  |
| 7948420      | 1.516718563 | 8.504313 | 9.033221 | 1.36E-07 | 4.05E-06  | 7.461343 | chr11 |
| 8142270      | 1.509027693 | 6.010971 | 16.86009 | 1.95E-11 | 2.54E-09  | 16.57275 | chr7  |
| 8150089      | 1.498746211 | 9.165451 | 17.28369 | 1.35E-11 | 1.88E-09  | 16.94681 | chr8  |
| 7928695      | 1.496088209 | 7.69591  | 20.43782 | 1.10E-12 | 2.81E-10  | 19.47304 | chr10 |
| 8109093      | 1.481255975 | 8.687533 | 23.29249 | 1.51E-13 | 6.14E-11  | 21.43151 | chr5  |
| 8048864      | 1.480080611 | 7.384378 | 7.542427 | 1.38E-06 | 2.79E-05  | 5.05576  | chr2  |
| 8056257      | 1.452689096 | 5.586128 | 9.545842 | 6.49E-08 | 2.16E-06  | 8.225946 | chr2  |
| 8150698      | 1.414382617 | 11.33301 | 24.82163 | 5.75E-14 | 2.79E-11  | 22.37613 | chr8  |
| 7908409      | 1.40620803  | 7.935798 | 7.469273 | 1.55E-06 | 3.05E-05  | 4.930347 | chr1  |
| 7963406      | 1.363782012 | 10.38448 | 13.85473 | 3.49E-10 | 2.75E-08  | 13.62744 | chr12 |
| 8171624      | 1.361886586 | 5.534783 | 13.43361 | 5.45E-10 | 4.02E-08  | 13.16825 | chrX  |
| 8174794      | 1.355393064 | 9.353678 | 27.02635 | 1.57E-14 | 1.08E-11  | 23.62896 | chrX  |
| 8054479      | 1.349354447 | 6.431752 | 17.83397 | 8.47E-12 | 1.26E-09  | 17.41945 | chr2  |
| 8115831      | 1.329359399 | 10.90346 | 33.12086 | 6.91E-16 | 8.58E-13  | 26.54937 | chr5  |
| 8049478      | 1.312652256 | 8.412235 | 20.74645 | 8.74E-13 | 2.35E-10  | 19.69837 | chr2  |
| 7926875      | 1.304941056 | 7.469252 | 19.36833 | 2.46E-12 | 5.15E-10  | 18.66389 | chr10 |
| 8054872      | 1.299701054 | 9.421506 | 9.167336 | 1.12E-07 | 3.43E-06  | 7.664325 | chr2  |
| 8072413      | 1.293130054 | 8.295545 | 18.30452 | 5.74E-12 | 9.51E-10  | 17.81223 | chr22 |
| 7908614      | 1.288919802 | 10.13889 | 16.5556  | 2.56E-11 | 3.08E-09  | 16.29815 | chr1  |
| 8081341      | 1.28560719  | 5.098379 | 6.637284 | 6.47E-06 | 9.87E-05  | 3.453392 | chr3  |
| 7957298      | 1.278125033 | 6.748617 | 20.85636 | 8.07E-13 | 2.20E-10  | 19.77776 | chr12 |
| 8097058      | 1.272423326 | 7.085243 | 6.82959  | 4.62E-06 | 7.50E-05  | 3.803087 | chr4  |

|         |              |          |          |          |            |          |       |
|---------|--------------|----------|----------|----------|------------|----------|-------|
| 8020806 | 1.254141095  | 6.272089 | 11.05438 | 8.69E-09 | 4.22E-07   | 10.31033 | chr18 |
| 8068583 | 1.241283913  | 6.166796 | 10.29615 | 2.32E-08 | 9.32E-07   | 9.292214 | chr21 |
| 8130151 | 1.238445894  | 7.661663 | 10.89314 | 1.07E-08 | 4.92E-07   | 10.09858 | chr6  |
| 8004784 | 1.237862359  | 8.598252 | 9.626137 | 5.80E-08 | 1.96E-06   | 8.342993 | chr17 |
| 7963421 | 1.228617496  | 11.75874 | 17.94308 | 7.73E-12 | 1.17E-09   | 17.51145 | chr12 |
| 7962058 | 1.222877003  | 9.227259 | 14.19152 | 2.46E-10 | 2.05E-08   | 13.98568 | chr12 |
| 7990952 | 1.222628452  | 7.514916 | 3.901893 | 0.001323 | 0.00825839 | -1.99297 | chr15 |
| 7931081 | 1.214226976  | 9.274433 | 16.10358 | 3.86E-11 | 4.41E-09   | 15.88134 | chr10 |
| 8099218 | 1.212355099  | 6.454319 | 13.25163 | 6.64E-10 | 4.78E-08   | 12.96583 | chr4  |
| 7924450 | 1.199629176  | 7.76435  | 17.75443 | 9.05E-12 | 1.33E-09   | 17.35204 | chr1  |
| 8130116 | 1.194914125  | 8.523785 | 15.18524 | 9.15E-11 | 8.88E-09   | 14.99888 | chr6  |
| 7978222 | 1.193795971  | 7.739253 | 12.1125  | 2.40E-09 | 1.42E-07   | 11.64025 | chr14 |
| 8102076 | 1.191286568  | 6.600881 | 8.834855 | 1.82E-07 | 5.14E-06   | 7.157207 | chr4  |
| 8023575 | 1.166383508  | 6.628152 | 12.73937 | 1.17E-09 | 7.72E-08   | 12.38251 | chr18 |
| 7982597 | 1.153466572  | 11.43763 | 15.92396 | 4.55E-11 | 5.05E-09   | 15.71257 | chr15 |
| 7938758 | 1.1467513    | 9.426954 | 12.85819 | 1.02E-09 | 6.95E-08   | 12.51963 | chr11 |
| 8012349 | 1.140805463  | 7.625518 | 11.45426 | 5.28E-09 | 2.75E-07   | 10.82484 | chr17 |
| 7909841 | 1.133904643  | 6.402163 | 8.305141 | 4.07E-07 | 1.01E-05   | 6.321553 | chr1  |
| 8120967 | 1.122512631  | 9.988328 | 22.58219 | 2.42E-13 | 8.50E-11   | 20.9693  | chr6  |
| 8166784 | 1.116796587  | 8.423589 | 10.80771 | 1.19E-08 | 5.31E-07   | 9.985381 | chrX  |
| 7942832 | 1.114405451  | 7.832856 | 9.373265 | 8.29E-08 | 2.65E-06   | 7.971915 | chr11 |
| 8023995 | 1.109211717  | 9.420652 | 19.20212 | 2.80E-12 | 5.63E-10   | 18.53401 | chr19 |
| 8093950 | 1.103826931  | 7.226138 | 7.329714 | 1.96E-06 | 3.70E-05   | 4.689109 | chr4  |
| 7972297 | 1.093357796  | 8.314075 | 14.82847 | 1.30E-10 | 1.21E-08   | 14.6424  | chr13 |
| 8096385 | 1.090564533  | 7.99344  | 7.819624 | 8.77E-07 | 1.91E-05   | 5.524552 | chr4  |
| 7963054 | 1.080043478  | 9.033462 | 12.65262 | 1.29E-09 | 8.46E-08   | 12.2817  | chr12 |
| 8095723 | 1.07493361   | 9.62184  | 7.474375 | 1.54E-06 | 3.04E-05   | 4.939117 | chr4  |
| 8105778 | 1.069343961  | 9.916926 | 11.0554  | 8.68E-09 | 4.22E-07   | 10.31167 | chr5  |
| 7925525 | 1.06134694   | 9.881416 | 7.415627 | 1.70E-06 | 3.28E-05   | 4.837924 | chr1  |
| 7914270 | 1.054883415  | 6.060835 | 9.359537 | 8.45E-08 | 2.69E-06   | 7.951562 | chr1  |
| 7991034 | 1.048036987  | 7.249636 | 18.23969 | 6.05E-12 | 9.95E-10   | 17.75871 | chr15 |
| 7933509 | 1.044141737  | 7.648385 | 9.1693   | 1.11E-07 | 3.43E-06   | 7.667282 | chr10 |
| 7908543 | 1.043054009  | 10.01585 | 8.997081 | 1.43E-07 | 4.23E-06   | 7.406282 | chr1  |
| 8086467 | 1.039197341  | 8.780312 | 14.76014 | 1.39E-10 | 1.28E-08   | 14.5732  | chr3  |
| 7902874 | 1.037978092  | 7.614246 | 14.95645 | 1.14E-10 | 1.08E-08   | 14.77119 | chr1  |
| 7968029 | 1.035879158  | 5.761905 | 10.43318 | 1.94E-08 | 8.00E-07   | 9.480496 | chr13 |
| 8013906 | 1.035607552  | 10.6876  | 11.10566 | 8.14E-09 | 3.99E-07   | 10.37716 | chr17 |
| 8059565 | 1.032315335  | 7.542929 | 11.28508 | 6.51E-09 | 3.29E-07   | 10.60899 | chr2  |
| 7943349 | 1.031130508  | 6.719645 | 7.988578 | 6.69E-07 | 1.52E-05   | 5.805345 | chr11 |
| 8165995 | 1.027472434  | 9.251035 | 13.29745 | 6.32E-10 | 4.61E-08   | 13.01702 | chrX  |
| 7965979 | 1.022857507  | 8.566055 | 9.262003 | 9.73E-08 | 3.05E-06   | 7.806335 | chr12 |
| 8044919 | 1.018654038  | 8.047794 | 17.96952 | 7.56E-12 | 1.16E-09   | 17.53365 | chr2  |
| 8012951 | 1.014833001  | 5.984368 | 4.450371 | 0.000426 | 0.00322222 | -0.84827 | chr17 |
| 8048870 | 1.013751001  | 5.184707 | 9.980975 | 3.55E-08 | 1.31E-06   | 8.851717 | chr2  |
| 8041995 | 1.013191163  | 9.233703 | 14.41957 | 1.95E-10 | 1.69E-08   | 14.22387 | chr2  |
| 8176133 | -1.001355938 | 10.81984 | -7.8474  | 8.38E-07 | 1.84E-05   | 5.570965 | chrX  |
| 8179326 | -1.002830181 | 9.703837 | -9.38277 | 8.18E-08 | 2.63E-06   | 7.985997 | chr6  |
| 7958828 | -1.003260566 | 8.720304 | -10.7443 | 1.29E-08 | 5.64E-07   | 9.900847 | chr12 |
| 8165672 | -1.007646886 | 5.563598 | -4.22381 | 0.000679 | 0.00475467 | -1.31996 | chrM  |
| 7969129 | -1.00802336  | 7.868495 | -5.87191 | 2.61E-05 | 0.00031383 | 2.012532 | chr13 |
| 7917649 | -1.010698832 | 6.983211 | -8.80395 | 1.90E-07 | 5.31E-06   | 7.109404 | chr1  |
| 8148572 | -1.016278658 | 11.49978 | -18.6644 | 4.29E-12 | 7.55E-10   | 18.10581 | chr8  |

|         |              |          |          |          |            |          |       |
|---------|--------------|----------|----------|----------|------------|----------|-------|
| 7929072 | -1.016921387 | 9.205829 | -18.4313 | 5.18E-12 | 8.80E-10   | 17.91633 | chr10 |
| 7942674 | -1.02279281  | 9.96837  | -15.3071 | 8.14E-11 | 8.05E-09   | 15.11883 | chr11 |
| 7976567 | -1.024350916 | 11.60304 | -19.3136 | 2.57E-12 | 5.27E-10   | 18.62128 | chr14 |
| 8019392 | -1.026542364 | 9.851223 | -6.25393 | 1.29E-05 | 0.000173   | 2.741408 | chr17 |
| 8121632 | -1.029040714 | 6.137163 | -8.48744 | 3.07E-07 | 7.91E-06   | 6.613068 | chr6  |
| 8095697 | -1.031684076 | 10.10484 | -7.0393  | 3.21E-06 | 5.56E-05   | 4.178723 | chr4  |
| 8175647 | -1.037689159 | 7.941264 | -24.0912 | 9.07E-14 | 4.01E-11   | 21.93316 | chrX  |
| 7928046 | -1.039475526 | 6.932726 | -14.5821 | 1.66E-10 | 1.48E-08   | 14.3915  | chr10 |
| 7993638 | -1.039570541 | 6.768968 | -14.5101 | 1.78E-10 | 1.57E-08   | 14.31752 | chr16 |
| 7948274 | -1.041680896 | 9.267354 | -12.1116 | 2.40E-09 | 1.42E-07   | 11.63914 | chr11 |
| 8103601 | -1.044542657 | 7.728657 | -8.91182 | 1.62E-07 | 4.68E-06   | 7.275773 | chr4  |
| 7912537 | -1.045720245 | 11.41874 | -23.0816 | 1.74E-13 | 6.65E-11   | 21.29588 | chr1  |
| 8018975 | -1.052110322 | 11.41482 | -12.5723 | 1.41E-09 | 9.12E-08   | 12.18788 | chr17 |
| 7937852 | -1.054018201 | 7.543165 | -11.7248 | 3.80E-09 | 2.07E-07   | 11.16462 | chr11 |
| 8034783 | -1.057112295 | 7.846433 | -8.93742 | 1.56E-07 | 4.53E-06   | 7.315042 | chr19 |
| 8132031 | -1.061055387 | 8.418311 | -9.78754 | 4.63E-08 | 1.63E-06   | 8.576098 | chr7  |
| 8150076 | -1.06613309  | 8.959921 | -14.3323 | 2.13E-10 | 1.83E-08   | 14.13309 | chr8  |
| 7909104 | -1.07340574  | 8.174545 | -12.7711 | 1.13E-09 | 7.53E-08   | 12.4192  | chr1  |
| 7899627 | -1.074156115 | 9.762425 | -23.948  | 9.93E-14 | 4.29E-11   | 21.84459 | chr1  |
| 8082075 | -1.07466189  | 9.943708 | -10.4519 | 1.89E-08 | 7.87E-07   | 9.506113 | chr3  |
| 7939559 | -1.081805544 | 8.987263 | -13.4853 | 5.16E-10 | 3.86E-08   | 13.22534 | chr11 |
| 8048350 | -1.082986582 | 5.119146 | -15.2928 | 8.25E-11 | 8.12E-09   | 15.10482 | chr2  |
| 8111739 | -1.089738769 | 7.145678 | -9.7405  | 4.94E-08 | 1.72E-06   | 8.508468 | chr5  |
| 7999253 | -1.092592011 | 7.044601 | -9.05665 | 1.31E-07 | 3.94E-06   | 7.496952 | chr16 |
| 8138728 | -1.09412945  | 7.907727 | -16.6002 | 2.46E-11 | 3.00E-09   | 16.33871 | chr7  |
| 7963567 | -1.097290195 | 11.51732 | -8.65265 | 2.39E-07 | 6.38E-06   | 6.873676 | chr12 |
| 7897774 | -1.100039315 | 7.240362 | -15.7618 | 5.29E-11 | 5.66E-09   | 15.55862 | chr1  |
| 7949410 | -1.103739436 | 8.658591 | -5.73944 | 3.35E-05 | 0.00038545 | 1.7554   | chr11 |
| 7949412 | -1.103956961 | 9.149256 | -9.5407  | 6.54E-08 | 2.17E-06   | 8.21843  | chr11 |
| 8094169 | -1.110444488 | 6.689482 | -10.4818 | 1.82E-08 | 7.61E-07   | 9.546888 | chr4  |
| 7949619 | -1.110773838 | 7.884934 | -18.1762 | 6.38E-12 | 1.03E-09   | 17.70613 | chr11 |
| 8165703 | -1.11392998  | 7.951672 | -4.9591  | 0.000153 | 0.0013735  | 0.198675 | chrM  |
| 7986004 | -1.117948044 | 6.932219 | -8.50408 | 2.99E-07 | 7.74E-06   | 6.639466 | chr15 |
| 8153262 | -1.118423276 | 6.650371 | -10.8676 | 1.10E-08 | 5.03E-07   | 10.06484 | chr8  |
| 7973427 | -1.119596815 | 6.750898 | -10.4443 | 1.91E-08 | 7.91E-07   | 9.495708 | chr14 |
| 8064245 | -1.119729048 | 8.482191 | -21.9654 | 3.69E-13 | 1.15E-10   | 20.555   | chr20 |
| 8001547 | -1.121616159 | 8.648083 | -11.0495 | 8.74E-09 | 4.24E-07   | 10.30397 | chr16 |
| 8115584 | -1.121649437 | 8.152332 | -18.1653 | 6.43E-12 | 1.03E-09   | 17.6971  | chr5  |
| 8138718 | -1.124031199 | 7.741127 | -13.3703 | 5.84E-10 | 4.28E-08   | 13.09814 | chr7  |
| 8026579 | -1.126410322 | 7.013069 | -16.2584 | 3.35E-11 | 3.87E-09   | 16.02537 | chr19 |
| 8109149 | -1.128216218 | 8.026256 | -16.8261 | 2.01E-11 | 2.57E-09   | 16.54229 | chr5  |
| 7923635 | -1.130485911 | 8.189013 | -9.17226 | 1.11E-07 | 3.42E-06   | 7.67173  | chr1  |
| 8176263 | -1.131110995 | 8.881447 | -14.1901 | 2.46E-10 | 2.05E-08   | 13.98424 | chrX  |
| 8091327 | -1.13256052  | 9.724105 | -12.94   | 9.35E-10 | 6.48E-08   | 12.61335 | chr3  |
| 8140967 | -1.138261369 | 10.34795 | -15.529  | 6.59E-11 | 6.76E-09   | 15.33501 | chr7  |
| 8097256 | -1.138477282 | 8.829471 | -23.2601 | 1.55E-13 | 6.15E-11   | 21.41077 | chr4  |
| 7940160 | -1.139848234 | 7.751207 | -8.86788 | 1.73E-07 | 4.94E-06   | 7.208175 | chr11 |
| 8073633 | -1.140852841 | 7.006222 | -11.3821 | 5.77E-09 | 2.97E-07   | 10.73309 | chr22 |
| 8114572 | -1.14544368  | 10.06949 | -22.5578 | 2.46E-13 | 8.50E-11   | 20.95316 | chr5  |
| 8173041 | -1.145910464 | 6.786961 | -8.777   | 1.98E-07 | 5.47E-06   | 7.067617 | chrX  |
| 7960757 | -1.151874845 | 7.216153 | -21.6258 | 4.67E-13 | 1.41E-10   | 20.32153 | chr12 |
| 8013660 | -1.156131767 | 9.434869 | -10.9286 | 1.02E-08 | 4.77E-07   | 10.14542 | chr17 |

|         |              |          |          |          |            |          |       |
|---------|--------------|----------|----------|----------|------------|----------|-------|
| 8059650 | -1.168539576 | 8.380828 | -14.0116 | 2.96E-10 | 2.38E-08   | 13.79531 | chr2  |
| 8108744 | -1.171941992 | 6.52212  | -9.0998  | 1.23E-07 | 3.73E-06   | 7.562372 | chr5  |
| 8057744 | -1.180559142 | 11.22553 | -16.9183 | 1.86E-11 | 2.44E-09   | 16.62472 | chr2  |
| 8068697 | -1.181257433 | 6.740915 | -8.88958 | 1.68E-07 | 4.80E-06   | 7.241582 | chr21 |
| 8160024 | -1.184212502 | 7.960318 | -7.09556 | 2.92E-06 | 5.14E-05   | 4.278488 | chr9  |
| 7922756 | -1.186548886 | 7.543204 | -13.5178 | 4.98E-10 | 3.77E-08   | 13.26109 | chr1  |
| 8137680 | -1.189122244 | 8.34588  | -10.4094 | 2.00E-08 | 8.19E-07   | 9.447936 | chr7  |
| 8007228 | -1.190304644 | 9.243748 | -11.9393 | 2.94E-09 | 1.69E-07   | 11.42936 | chr17 |
| 7994981 | -1.191967751 | 8.256193 | -15.0066 | 1.09E-10 | 1.04E-08   | 14.82135 | chr16 |
| 8040985 | -1.193861219 | 8.454756 | -12.0432 | 2.60E-09 | 1.52E-07   | 11.55618 | chr2  |
| 7941961 | -1.203236008 | 8.820723 | -12.4826 | 1.56E-09 | 1.00E-07   | 12.08232 | chr11 |
| 8033241 | -1.205018572 | 9.546705 | -12.8518 | 1.03E-09 | 6.97E-08   | 12.51225 | chr19 |
| 7958262 | -1.206256428 | 7.597753 | -11.448  | 5.32E-09 | 2.76E-07   | 10.81697 | chr12 |
| 8071155 | -1.212283618 | 9.640311 | -16.2843 | 3.27E-11 | 3.80E-09   | 16.0493  | chr22 |
| 8164535 | -1.213107433 | 7.175253 | -12.2505 | 2.04E-09 | 1.26E-07   | 11.8064  | chr9  |
| 7983650 | -1.220807888 | 9.618208 | -14.9535 | 1.15E-10 | 1.08E-08   | 14.76824 | chr15 |
| 7937713 | -1.224099709 | 9.539026 | -20.4298 | 1.10E-12 | 2.81E-10   | 19.46715 | chr11 |
| 8013450 | -1.224623615 | 7.557561 | -12.8751 | 1.00E-09 | 6.84E-08   | 12.53909 | chr17 |
| 7976560 | -1.225366564 | 8.151615 | -16.1678 | 3.64E-11 | 4.18E-09   | 15.9412  | chr14 |
| 7909214 | -1.231738209 | 7.449369 | -10.6402 | 1.48E-08 | 6.27E-07   | 9.761304 | chr1  |
| 8113504 | -1.233233338 | 7.983887 | -20.2244 | 1.28E-12 | 3.15E-10   | 19.31516 | chr5  |
| 7904726 | -1.236858189 | 11.58722 | -19.4992 | 2.22E-12 | 4.71E-10   | 18.76534 | chr1  |
| 7953603 | -1.250121647 | 7.865802 | -12.803  | 1.09E-09 | 7.29E-08   | 12.45603 | chr12 |
| 8026398 | -1.253481989 | 5.27864  | -10.8164 | 1.18E-08 | 5.27E-07   | 9.996898 | chr19 |
| 8024687 | -1.25660978  | 7.299527 | -11.8273 | 3.36E-09 | 1.88E-07   | 11.29159 | chr19 |
| 7988444 | -1.262844041 | 6.842271 | -10.8386 | 1.14E-08 | 5.18E-07   | 10.02633 | chr15 |
| 8015337 | -1.263936747 | 8.732588 | -9.87257 | 4.12E-08 | 1.48E-06   | 8.69776  | chr17 |
| 8025601 | -1.264430145 | 8.971274 | -20.4781 | 1.06E-12 | 2.78E-10   | 19.50262 | chr19 |
| 8085431 | -1.265438739 | 8.276315 | -12.0561 | 2.56E-09 | 1.50E-07   | 11.57191 | chr3  |
| 8117476 | -1.267622131 | 8.1718   | -14.6458 | 1.55E-10 | 1.41E-08   | 14.45678 | chr6  |
| 7928872 | -1.268212077 | 8.819903 | -21.5698 | 4.86E-13 | 1.44E-10   | 20.28264 | chr10 |
| 7898677 | -1.268334155 | 8.236522 | -4.38147 | 0.000491 | 0.00362749 | -0.99146 | chr1  |
| 7913694 | -1.269796848 | 9.015707 | -17.44   | 1.18E-11 | 1.67E-09   | 17.08259 | chr1  |
| 7940565 | -1.270876067 | 10.06137 | -12.3933 | 1.73E-09 | 1.08E-07   | 11.97676 | chr11 |
| 7994769 | -1.272993022 | 7.757324 | -12.9667 | 9.07E-10 | 6.33E-08   | 12.6439  | chr16 |
| 7992518 | -1.275062066 | 7.575584 | -12.1927 | 2.19E-09 | 1.33E-07   | 11.73701 | chr16 |
| 8004266 | -1.286347016 | 8.161153 | -12.2186 | 2.12E-09 | 1.30E-07   | 11.7682  | chr17 |
| 7917516 | -1.288563419 | 10.17253 | -18.5823 | 4.58E-12 | 7.92E-10   | 18.0394  | chr1  |
| 8050007 | -1.293470271 | 6.966603 | -16.9971 | 1.73E-11 | 2.31E-09   | 16.69473 | chr2  |
| 7927964 | -1.295976248 | 7.589865 | -7.82675 | 8.67E-07 | 1.89E-05   | 5.536471 | chr10 |
| 8147344 | -1.307031152 | 10.02873 | -25.2595 | 4.41E-14 | 2.19E-11   | 22.63475 | chr8  |
| 7981142 | -1.315274446 | 8.672019 | -17.2255 | 1.42E-11 | 1.96E-09   | 16.89594 | chr14 |
| 8104930 | -1.317943175 | 9.234082 | -15.7989 | 5.11E-11 | 5.49E-09   | 15.59398 | chr5  |
| 7961540 | -1.318980466 | 7.182388 | -17.0256 | 1.69E-11 | 2.29E-09   | 16.72    | chr12 |
| 7964119 | -1.32165783  | 8.574789 | -15.8267 | 4.98E-11 | 5.38E-09   | 15.62047 | chr12 |
| 8129937 | -1.322193698 | 9.237724 | -20.097  | 1.41E-12 | 3.38E-10   | 19.22008 | chr6  |
| 8126820 | -1.325906321 | 6.491672 | -16.8079 | 2.05E-11 | 2.58E-09   | 16.52607 | chr6  |
| 8177732 | -1.330543212 | 10.59061 | -26.6383 | 1.96E-14 | 1.22E-11   | 23.41706 | chr6  |
| 7918323 | -1.335847075 | 9.265853 | -15.2673 | 8.46E-11 | 8.28E-09   | 15.07976 | chr1  |
| 8062041 | -1.350199082 | 8.959658 | -9.69806 | 5.24E-08 | 1.80E-06   | 8.447219 | chr20 |
| 8013616 | -1.351385297 | 8.553768 | -20.3525 | 1.17E-12 | 2.94E-10   | 19.41009 | chr17 |
| 8034210 | -1.354051877 | 10.04103 | -22.6954 | 2.25E-13 | 8.12E-11   | 21.04399 | chr19 |



|         |              |          |          |          |          |          |       |
|---------|--------------|----------|----------|----------|----------|----------|-------|
| 8023696 | -1.36374002  | 7.761793 | -9.40693 | 7.90E-08 | 2.55E-06 | 8.021738 | chr18 |
| 8112202 | -1.365910824 | 9.492864 | -17.8976 | 8.03E-12 | 1.20E-09 | 17.47321 | chr5  |
| 8080762 | -1.36786756  | 8.188919 | -21.3133 | 5.82E-13 | 1.68E-10 | 20.10317 | chr3  |
| 8140534 | -1.371130391 | 8.691797 | -18.6952 | 4.18E-12 | 7.46E-10 | 18.13071 | chr7  |
| 8150509 | -1.372098565 | 10.2331  | -17.6414 | 9.96E-12 | 1.45E-09 | 17.25572 | chr8  |
| 7923547 | -1.373742819 | 6.212345 | -8.65936 | 2.36E-07 | 6.34E-06 | 6.884184 | chr1  |
| 8099259 | -1.377828217 | 8.559377 | -13.8313 | 3.58E-10 | 2.81E-08 | 13.60226 | chr4  |
| 8179019 | -1.380775232 | 9.355754 | -22.5491 | 2.48E-13 | 8.50E-11 | 20.94741 | chr6  |
| 7990138 | -1.383349717 | 7.431021 | -16.8302 | 2.01E-11 | 2.57E-09 | 16.54601 | chr15 |
| 7990391 | -1.392856128 | 5.968176 | -14.1174 | 2.66E-10 | 2.17E-08 | 13.90747 | chr15 |
| 7919627 | -1.39826537  | 7.968548 | -7.10071 | 2.89E-06 | 5.11E-05 | 4.287589 | chr1  |
| 8129848 | -1.399705786 | 5.688899 | -14.1281 | 2.63E-10 | 2.16E-08 | 13.91886 | chr6  |
| 7938035 | -1.404078392 | 9.928868 | -19.7599 | 1.82E-12 | 3.94E-10 | 18.96539 | chr11 |
| 8027748 | -1.405705799 | 11.26163 | -13.2953 | 6.33E-10 | 4.61E-08 | 13.01462 | chr19 |
| 7927732 | -1.408875302 | 6.88799  | -14.8972 | 1.21E-10 | 1.14E-08 | 14.71168 | chr10 |
| 8008201 | -1.411849351 | 6.560393 | -16.8959 | 1.89E-11 | 2.48E-09 | 16.60471 | chr17 |
| 7905428 | -1.412509112 | 8.419631 | -20.1579 | 1.35E-12 | 3.27E-10 | 19.26561 | chr1  |
| 8049528 | -1.41716302  | 7.874861 | -8.49819 | 3.02E-07 | 7.80E-06 | 6.630122 | chr2  |
| 8035304 | -1.42710508  | 10.80234 | -20.5463 | 1.01E-12 | 2.68E-10 | 19.55268 | chr19 |
| 7915500 | -1.432576529 | 6.835063 | -13.5123 | 5.01E-10 | 3.77E-08 | 13.25506 | chr1  |
| 7918426 | -1.434596063 | 7.849483 | -13.6917 | 4.14E-10 | 3.16E-08 | 13.4512  | chr1  |
| 8129666 | -1.440108565 | 6.319981 | -16.5451 | 2.58E-11 | 3.10E-09 | 16.28857 | chr6  |
| 7977270 | -1.446282342 | 9.553815 | -11.1608 | 7.60E-09 | 3.75E-07 | 10.44867 | chr14 |
| 8025053 | -1.448363111 | 9.522353 | -16.4328 | 2.86E-11 | 3.40E-09 | 16.18599 | chr19 |
| 8021603 | -1.4496344   | 6.777894 | -14.152  | 2.56E-10 | 2.11E-08 | 13.94409 | chr18 |
| 8132347 | -1.449795394 | 7.44373  | -14.508  | 1.78E-10 | 1.57E-08 | 14.31529 | chr7  |
| 7953135 | -1.454918815 | 8.458524 | -12.4243 | 1.67E-09 | 1.06E-07 | 12.0135  | chr12 |
| 8067955 | -1.464836961 | 9.184997 | -16.4138 | 2.91E-11 | 3.40E-09 | 16.1686  | chr21 |
| 8007100 | -1.470459263 | 7.639134 | -10.9099 | 1.04E-08 | 4.85E-07 | 10.12068 | chr17 |
| 8066117 | -1.476235011 | 10.3098  | -14.0389 | 2.88E-10 | 2.33E-08 | 13.82429 | chr20 |
| 8004184 | -1.481461678 | 7.122284 | -12.1665 | 2.25E-09 | 1.37E-07 | 11.70553 | chr17 |
| 8108873 | -1.484111138 | 7.784911 | -18.2004 | 6.25E-12 | 1.02E-09 | 17.72624 | chr5  |
| 7962375 | -1.484807065 | 8.337273 | -15.7272 | 5.47E-11 | 5.75E-09 | 15.5256  | chr12 |
| 8000799 | -1.510788204 | 7.597441 | -14.175  | 2.50E-10 | 2.07E-08 | 13.96832 | chr16 |
| 7976425 | -1.51896326  | 7.433822 | -16.9625 | 1.79E-11 | 2.37E-09 | 16.66404 | chr14 |
| 7967202 | -1.536146475 | 9.186629 | -27.4028 | 1.27E-14 | 9.34E-12 | 23.83118 | chr12 |
| 8139500 | -1.548817866 | 8.120954 | -13.8114 | 3.65E-10 | 2.84E-08 | 13.5808  | chr7  |
| 8179495 | -1.572448995 | 9.770208 | -27.7746 | 1.03E-14 | 8.22E-12 | 24.02775 | chr6  |
| 7901272 | -1.583096536 | 7.445535 | -16.0642 | 4.00E-11 | 4.54E-09 | 15.84453 | chr1  |
| 8073081 | -1.591467842 | 8.927554 | -10.714  | 1.34E-08 | 5.81E-07 | 9.860373 | chr22 |
| 8115302 | -1.618012315 | 8.807338 | -14.3044 | 2.19E-10 | 1.88E-08 | 14.10399 | chr5  |
| 8114287 | -1.624919636 | 6.74354  | -13.9801 | 3.06E-10 | 2.44E-08 | 13.76168 | chr5  |
| 7958895 | -1.628984766 | 9.234291 | -15.4097 | 7.38E-11 | 7.43E-09 | 15.21911 | chr12 |
| 7976443 | -1.636591254 | 11.87552 | -26.8783 | 1.71E-14 | 1.13E-11 | 23.54856 | chr14 |
| 8116418 | -1.647391219 | 7.090608 | -15.1753 | 9.24E-11 | 8.92E-09 | 14.98908 | chr5  |
| 8092348 | -1.650294454 | 8.474058 | -17.9213 | 7.87E-12 | 1.19E-09 | 17.49315 | chr3  |
| 7931108 | -1.653588984 | 6.896418 | -12.0013 | 2.74E-09 | 1.59E-07 | 11.50512 | chr10 |
| 8109563 | -1.658871882 | 7.142293 | -17.6596 | 9.81E-12 | 1.43E-09 | 17.27126 | chr5  |
| 7903786 | -1.660721263 | 8.798582 | -21.0391 | 7.08E-13 | 1.95E-10 | 19.9088  | chr1  |
| 7960744 | -1.670812151 | 9.129743 | -15.8842 | 4.72E-11 | 5.16E-09 | 15.67501 | chr12 |
| 8157650 | -1.680460412 | 6.914788 | -11.8678 | 3.21E-09 | 1.81E-07 | 11.3416  | chr9  |
| 7975390 | -1.691663858 | 8.828375 | -17.4916 | 1.13E-11 | 1.62E-09 | 17.12713 | chr14 |

|         |              |          |          |          |          |          |       |
|---------|--------------|----------|----------|----------|----------|----------|-------|
| 7912937 | -1.695684616 | 6.134329 | -14.7234 | 1.44E-10 | 1.32E-08 | 14.53588 | chr1  |
| 8096335 | -1.717952756 | 10.00593 | -15.7291 | 5.46E-11 | 5.75E-09 | 15.52746 | chr4  |
| 8137526 | -1.746122057 | 9.047962 | -37.3623 | 1.08E-16 | 1.95E-13 | 28.21411 | chr7  |
| 8092726 | -1.762955389 | 10.71196 | -40.2817 | 3.36E-17 | 7.43E-14 | 29.22213 | chr3  |
| 8114010 | -1.769625985 | 7.917624 | -19.093  | 3.05E-12 | 6.02E-10 | 18.44811 | chr5  |
| 8056285 | -1.770229573 | 8.445627 | -13.8191 | 3.62E-10 | 2.82E-08 | 13.5891  | chr2  |
| 8079733 | -1.777913547 | 6.125235 | -19.9761 | 1.55E-12 | 3.60E-10 | 19.1292  | chr3  |
| 8158167 | -1.815144593 | 8.012954 | -21.4208 | 5.39E-13 | 1.58E-10 | 20.17865 | chr9  |
| 8114612 | -1.822269157 | 10.15692 | -18.3893 | 5.36E-12 | 8.95E-10 | 17.88192 | chr5  |
| 8138735 | -1.828303655 | 9.425524 | -27.6281 | 1.12E-14 | 8.56E-12 | 23.95066 | chr7  |
| 8072926 | -1.831977786 | 10.45198 | -26.4362 | 2.20E-14 | 1.29E-11 | 23.30536 | chr22 |
| 7940775 | -1.859986868 | 7.381843 | -14.1909 | 2.46E-10 | 2.05E-08 | 13.985   | chr11 |
| 8104901 | -1.880973951 | 8.081989 | -20.0753 | 1.44E-12 | 3.40E-10 | 19.20379 | chr5  |
| 8142981 | -1.881597051 | 8.844124 | -16.9965 | 1.73E-11 | 2.31E-09 | 16.6942  | chr7  |
| 8064613 | -1.88167014  | 7.236308 | -22.4847 | 2.59E-13 | 8.68E-11 | 20.90462 | chr20 |
| 7941148 | -1.892708436 | 7.370589 | -23.748  | 1.13E-13 | 4.67E-11 | 21.71988 | chr11 |
| 7902553 | -1.898561446 | 8.597462 | -12.2343 | 2.08E-09 | 1.28E-07 | 11.78696 | chr1  |
| 8103563 | -1.904211114 | 9.206755 | -21.7232 | 4.36E-13 | 1.33E-10 | 20.38887 | chr4  |
| 7973618 | -1.914861923 | 9.722014 | -18.922  | 3.49E-12 | 6.55E-10 | 18.3125  | chr14 |
| 8039144 | -1.93950267  | 7.907301 | -17.9831 | 7.48E-12 | 1.16E-09 | 17.54501 | chr19 |
| 8152703 | -1.982311146 | 6.949538 | -34.381  | 3.88E-16 | 5.15E-13 | 27.07131 | chr8  |
| 7930498 | -1.989379834 | 7.295624 | -26.548  | 2.06E-14 | 1.24E-11 | 23.36726 | chr10 |
| 8101131 | -2.005981708 | 7.907529 | -9.62653 | 5.79E-08 | 1.96E-06 | 8.343565 | chr4  |
| 8118111 | -2.008918229 | 10.12601 | -21.0513 | 7.02E-13 | 1.95E-10 | 19.91748 | chr6  |
| 8087485 | -2.014282152 | 7.902189 | -15.519  | 6.65E-11 | 6.78E-09 | 15.32532 | chr3  |
| 8096361 | -2.018856532 | 7.979554 | -17.307  | 1.32E-11 | 1.85E-09 | 16.96711 | chr4  |
| 8106393 | -2.02101693  | 6.77654  | -21.2618 | 6.04E-13 | 1.71E-10 | 20.06691 | chr5  |
| 8027002 | -2.038294981 | 10.93833 | -50.6823 | 9.57E-19 | 9.52E-15 | 32.11568 | chr19 |
| 7996081 | -2.039368983 | 8.777688 | -18.9379 | 3.45E-12 | 6.55E-10 | 18.32515 | chr16 |
| 8169504 | -2.040692243 | 6.402955 | -18.7092 | 4.14E-12 | 7.46E-10 | 18.14197 | chrX  |
| 8007446 | -2.064862927 | 10.28338 | -27.2461 | 1.39E-14 | 9.84E-12 | 23.74737 | chr17 |
| 8160559 | -2.083991905 | 10.37023 | -24.1617 | 8.67E-14 | 4.01E-11 | 21.97658 | chr9  |
| 7919984 | -2.09213749  | 8.578267 | -19.956  | 1.57E-12 | 3.60E-10 | 19.11407 | chr1  |
| 8090018 | -2.131129728 | 9.365539 | -26.8168 | 1.77E-14 | 1.13E-11 | 23.51496 | chr3  |
| 8066214 | -2.134931406 | 8.563213 | -25.8113 | 3.17E-14 | 1.75E-11 | 22.95353 | chr20 |
| 8149927 | -2.155420991 | 8.354337 | -18.9627 | 3.38E-12 | 6.53E-10 | 18.34492 | chr8  |
| 8051583 | -2.174356471 | 9.699769 | -15.9177 | 4.58E-11 | 5.06E-09 | 15.70664 | chr2  |
| 8088642 | -2.226624108 | 7.581469 | -22.0404 | 3.50E-13 | 1.11E-10 | 20.606   | chr3  |
| 8100026 | -2.231401325 | 6.596712 | -25.3551 | 4.16E-14 | 2.12E-11 | 22.69051 | chr4  |
| 7997139 | -2.259921272 | 6.455347 | -22.1304 | 3.29E-13 | 1.06E-10 | 20.66704 | chr16 |
| 8004416 | -2.27256306  | 7.8694   | -38.6909 | 6.27E-17 | 1.25E-13 | 28.68553 | chr17 |
| 7908793 | -2.277984631 | 7.567431 | -19.8415 | 1.71E-12 | 3.83E-10 | 19.02744 | chr1  |
| 8179351 | -2.311293831 | 9.351359 | -22.4667 | 2.62E-13 | 8.68E-11 | 20.89263 | chr6  |
| 7898431 | -2.381335232 | 6.483198 | -19.3279 | 2.54E-12 | 5.26E-10 | 18.63237 | chr1  |
| 8014316 | -2.44182163  | 7.858205 | -27.8219 | 1.01E-14 | 8.22E-12 | 24.05251 | chr17 |
| 7902541 | -2.446276598 | 11.15163 | -16.0421 | 4.08E-11 | 4.58E-09 | 15.82382 | chr1  |
| 8052947 | -2.576636673 | 6.953435 | -23.893  | 1.03E-13 | 4.35E-11 | 21.81045 | chr2  |
| 8140971 | -2.580964952 | 8.737947 | -29.7861 | 3.53E-15 | 3.51E-12 | 25.04016 | chr7  |
| 7958884 | -2.581575601 | 10.8873  | -42.6265 | 1.40E-17 | 4.18E-14 | 29.96212 | chr12 |
| 7937335 | -2.697926916 | 12.06271 | -60.0006 | 6.96E-20 | 1.38E-15 | 34.03017 | chr11 |
| 8136200 | -2.802366714 | 7.191467 | -24.1224 | 8.89E-14 | 4.01E-11 | 21.95238 | chr7  |
| 8092169 | -2.87753998  | 9.191239 | -13.8839 | 3.38E-10 | 2.68E-08 | 13.65878 | chr3  |

|         |              |          |          |          |          |          |       |
|---------|--------------|----------|----------|----------|----------|----------|-------|
| 7977046 | -2.995614594 | 8.768185 | -28.0008 | 9.12E-15 | 8.22E-12 | 24.14581 | chr14 |
| 7929047 | -3.01150007  | 8.170397 | -36.8198 | 1.35E-16 | 2.24E-13 | 28.0152  | chr10 |
| 7967117 | -3.048992524 | 8.850352 | -30.9603 | 1.95E-15 | 2.15E-12 | 25.59417 | chr12 |
| 7929052 | -3.240340589 | 8.599761 | -23.1573 | 1.65E-13 | 6.45E-11 | 21.34475 | chr10 |
| 7961142 | -3.271758212 | 7.198477 | -22.8659 | 2.01E-13 | 7.45E-11 | 21.15578 | chr12 |
| 8101126 | -3.394877212 | 8.61477  | -17.0586 | 1.64E-11 | 2.24E-09 | 16.74916 | chr4  |
| 8040080 | -3.428586153 | 8.497498 | -36.575  | 1.50E-16 | 2.29E-13 | 27.92415 | chr2  |
| 8160670 | -3.517058495 | 8.405114 | -47.479  | 2.64E-18 | 1.33E-14 | 31.32426 | chr9  |
| 7958913 | -3.663169614 | 9.967077 | -31.508  | 1.49E-15 | 1.74E-12 | 25.84389 | chr12 |
| 8067140 | -4.174815793 | 6.929765 | -41.5152 | 2.11E-17 | 5.24E-14 | 29.61865 | chr20 |
| 7929065 | -4.48886515  | 9.643548 | -22.853  | 2.02E-13 | 7.45E-11 | 21.14738 | chr10 |

| start    | end      | strand | geneID       | genename  |
|----------|----------|--------|--------------|-----------|
| 1.18E+08 | 1.18E+08 | +      | NM_001011709 | PNLIPRP3  |
| 23194040 | 23228200 | +      | NM_001039    | SCNN1G    |
| 15133970 | 15268754 | +      | NM_001031853 | INSC      |
| 1.55E+08 | 1.55E+08 | -      | NM_001289    | CLIC2     |
| 95078714 | 95090397 | +      | NM_001085    | SERPINA3  |
| 39917029 | 40177356 | -      | NM_005780    | LHFP      |
| 39738531 | 39743173 | -      | NM_000526    | KRT14     |
| 14303634 | 14318270 | -      | NM_198391    | FLRT3     |
| 8429011  | 8439257  | +      | NM_139314    | ANGPTL4   |
| 1.01E+08 | 1.01E+08 | +      | NM_000602    | SERPINE1  |
| 0        | 0        | ---    | ---          | NA        |
| 1.49E+08 | 1.49E+08 | +      | NM_000112    | SLC26A2   |
| 91539035 | 91576806 | -      | NM_001920    | DCN       |
| 2.3E+08  | 2.31E+08 | -      | NM_139072    | DNER      |
| 1.17E+08 | 1.17E+08 | +      | NM_001001522 | TAGLN     |
| 37006495 | 37017008 | +      | NM_003914    | CCNA1     |
| 2.42E+08 | 2.43E+08 | -      | NM_152666    | PLD5      |
| 82068863 | 82132137 | +      | NM_002153    | HSD17B2   |
| 43803498 | 43805185 | +      | NM_002638    | PI3       |
| 8819340  | 8824583  | +      | NM_002166    | ID2       |
| 1290619  | 1309826  | -      | NM_080489    | SDCBP2    |
| 1.55E+08 | 1.55E+08 | +      | NM_007288    | MME       |
| 2.16E+08 | 2.16E+08 | -      | NM_212482    | FN1       |
| 33172392 | 33624576 | +      | NM_206943    | LTBP1     |
| 2.01E+08 | 2.02E+08 | +      | NM_001159    | AOX1      |
| 1.34E+08 | 1.34E+08 | -      | NM_001135242 | NDRG1     |
| 16023181 | 16045676 | -      | NM_021187    | CYP4F11   |
| 61554939 | 61571122 | +      | NM_001143818 | SERPINB2  |
| 1.53E+08 | 1.53E+08 | +      | NM_003125    | SPRR1B    |
| 59548559 | 59549224 | -      | NM_001444    | FABP5     |
| 1.08E+08 | 1.08E+08 | -      | NM_001037132 | NRCAM     |
| 29920609 | 29940659 | -      | NM_016127    | TMEM66    |
| 82167585 | 82192753 | +      | NM_032333    | C10orf58  |
| 1.49E+08 | 1.49E+08 | +      | NM_014945    | ABLIM3    |
| 2.29E+08 | 2.29E+08 | +      | NM_004591    | CCL20     |
| 1.63E+08 | 1.63E+08 | -      | NM_004460    | FAP       |
| 49830236 | 49833991 | -      | NM_003068    | SNAI2     |
| 1.93E+08 | 1.93E+08 | +      | NM_002923    | RGS2      |
| 52840435 | 52845910 | -      | NM_005555    | KRT6B     |
| 19007427 | 19140755 | -      | NM_001079858 | GPR64     |
| 1.2E+08  | 1.2E+08  | -      | NM_001079872 | CUL4B     |
| 1.11E+08 | 1.11E+08 | -      | NM_005434    | MALL      |
| 1.72E+08 | 1.72E+08 | -      | NM_004417    | DUSP1     |
| 2.38E+08 | 2.38E+08 | +      | NM_198189    | COPS8     |
| 28966271 | 28972120 | +      | NM_012342    | BAMBI     |
| 1.22E+08 | 1.22E+08 | -      | NM_014553    | TFCP2L1   |
| 31477305 | 31500610 | +      | NM_134269    | SMTN      |
| 2.01E+08 | 2.01E+08 | +      | NM_203459    | CAMSAP1L1 |
| 1.01E+08 | 1.01E+08 | +      | AK127584     | FAM172B   |
| 78225197 | 78606790 | +      | NM_014903    | NAV3      |
| 1.19E+08 | 1.19E+08 | +      | NR_003135    | CEP170L   |

|          |          |   |              |          |
|----------|----------|---|--------------|----------|
| 29598445 | 29653154 | + | NM_017831    | RNF125   |
| 39628664 | 39673748 | + | NM_002243    | KCNJ15   |
| 1.5E+08  | 1.5E+08  | - | NM_139165    | RAET1E   |
| 7942358  | 7952616  | + | NM_001141    | ALOX15B  |
| 52880958 | 52887022 | - | NM_005554    | KRT6A    |
| 29653757 | 29937692 | - | NM_175861    | TMTC1    |
| 83140664 | 83182901 | - | NR_026811    | LOC80154 |
| 1.24E+08 | 1.24E+08 | + | NM_021622    | PLEKHA1  |
| 6322305  | 6474326  | - | NM_020416    | PPP2R2C  |
| 2.22E+08 | 2.22E+08 | - | NM_007207    | DUSP10   |
| 1.5E+08  | 1.5E+08  | - | NM_004690    | LATS1    |
| 24718320 | 24732416 | - | NM_000359    | TGM1     |
| 1.04E+08 | 1.04E+08 | - | NM_001813    | CENPE    |
| 57101144 | 57364600 | - | NM_133459    | CCBE1    |
| 39873280 | 39889668 | + | NM_003246    | THBS1    |
| 18287770 | 18291514 | + | NM_000331    | SAA1     |
| 8043790  | 8055702  | - | NM_002616    | PER1     |
| 2.21E+08 | 2.21E+08 | + | NM_018650    | MARK1    |
| 86159809 | 86205498 | + | NM_002526    | NT5E     |
| 38420609 | 38548174 | + | NM_004615    | TSPAN7   |
| 82612768 | 82645701 | + | NM_145018    | C11orf82 |
| 676389   | 683392   | + | NM_005860    | FSTL3    |
| 6694796  | 6698897  | + | NM_005980    | S100P    |
| 95672089 | 95953683 | - | NM_005845    | ABCC4    |
| 89513647 | 89629686 | + | NM_014606    | HERC3    |
| 49578580 | 49582896 | - | NM_006009    | TUBA1A   |
| 75174204 | 75179307 | + | NM_001013442 | EPGN     |
| 67511604 | 67597649 | + | NM_181523    | PIK3R1   |
| 2.43E+08 | 2.43E+08 | - | NM_014812    | CEP170   |
| 31205316 | 31230667 | - | NM_006762    | LAPTM5   |
| 83517735 | 83621473 | - | NM_199330    | HOMER2   |
| 50663414 | 50747588 | - | NM_000124    | ERCC6    |
| 1.98E+08 | 1.98E+08 | + | NM_133494    | NEK7     |
| 43407818 | 43663560 | - | NM_018075    | ANO10    |
| 90098631 | 90230077 | + | NM_032270    | LRRC8C   |
| 24463028 | 24466242 | + | NM_001014442 | PCOTH    |
| 27530441 | 27531492 | - | NM_002822    | TWF1     |
| 2.3E+08  | 2.3E+08  | - | NM_017933    | PID1     |
| 1.01E+08 | 1.01E+08 | + | NM_152432    | ARHGAP42 |
| 11129421 | 11141206 | + | NM_005333    | HCCS     |
| 1.05E+08 | 1.05E+08 | - | NM_001034173 | ALDH1L2  |
| 1.21E+08 | 1.21E+08 | + | NM_002881    | RALB     |
| 15518959 | 15519123 | - | NM_006382    | CDRT1    |
| 2.29E+08 | 2.29E+08 | + | NM_178821    | WDR69    |
| 54683454 | 54898583 | + | NM_003128    | SPTBN1   |
| 1.54E+08 | 1.54E+08 | - | NM_000402    | G6PD     |
| 31802645 | 31807541 | + | NM_001040437 | C6orf48  |
| 1.13E+08 | 1.13E+08 | + | NM_001143906 | TRAFD1   |
| 9992     | 10059    | + | L23320       | RFC1     |
| 50069801 | 50103123 | + | NM_001040443 | PHF11    |
| 92145900 | 92371559 | - | NM_003243    | TGFBR3   |
| 1.44E+08 | 1.44E+08 | + | NM_002346    | LY6E     |

|          |          |   |              |          |
|----------|----------|---|--------------|----------|
| 91174343 | 91180758 | + | NM_012420    | IFIT5    |
| 76494285 | 76509198 | + | NM_015516    | TSKU     |
| 96722559 | 96731100 | + | NM_000710    | BDKRB1   |
| 80036213 | 80056106 | - | NM_004104    | FASN     |
| 1.17E+08 | 1.17E+08 | + | NM_002269    | KPNA5    |
| 74735109 | 74749385 | + | NM_001511    | CXCL1    |
| 1.5E+08  | 1.5E+08  | - | NM_031462    | CD99L2   |
| 71211226 | 71267425 | + | NM_012339    | TSPAN15  |
| 19422057 | 19510432 | + | NM_001105248 | TMC5     |
| 57319129 | 57335757 | - | NM_004223    | UBE2L6   |
| 1.69E+08 | 1.69E+08 | - | NM_001012967 | DDX60L   |
| 12627939 | 12677820 | - | NM_004753    | DHRS3    |
| 76967335 | 76976061 | - | NM_005567    | LGALS3BP |
| 2920951  | 2946476  | + | NM_002555    | SLC22A18 |
| 14258547 | 14316997 | - | NM_001008701 | LPHN1    |
| 29603427 | 29606911 | + | NM_175887    | PRR15    |
| 29193608 | 29208185 | - | NM_001394    | DUSP4    |
| 2.05E+08 | 2.06E+08 | + | NM_212503    | CDK18    |
| 32042113 | 32053287 | + | NM_022164    | TINAGL1  |
| 1.22E+08 | 1.22E+08 | + | NM_138287    | DTX3L    |
| 44881875 | 44952900 | + | NM_130783    | TSPAN18  |
| 2.19E+08 | 2.2E+08  | + | NM_032726    | PLCD4    |
| 39105357 | 39219675 | - | NM_001465    | FYB      |
| 4932508  | 4987136  | - | NM_002705    | PPL      |
| 27168010 | 27170399 | - | NM_002141    | HOXA4    |
| 53290971 | 53298860 | - | NM_002273    | KRT8     |
| 11866268 | 11903201 | + | NM_001286    | CLCN6    |
| 65270115 | 65270288 | - | BC018448     | MALAT1   |
| 65306274 | 65325699 | - | NM_001130144 | LTBP3    |
| 15005522 | 15071774 | + | NM_182485    | CPEB2    |
| 66129992 | 66139645 | - | NM_001532    | SLC29A2  |
| 7446     | 7517     | - | AF284753     | UIMC1    |
| 90895542 | 90909309 | + | NM_001004309 | ZNF774   |
| 1.42E+08 | 1.42E+08 | - | NM_001080431 | SLC45A4  |
| 24025231 | 24028787 | + | NM_024328    | THTPA    |
| 62688439 | 62703700 | + | NM_198723    | TCEA2    |
| 57290004 | 57318576 | - | NM_015993    | PLLP     |
| 1.6E+08  | 1.6E+08  | - | NM_024565    | CCNJL    |
| 27139973 | 27142394 | - | NM_006735    | HOXA2    |
| 16771938 | 16799831 | + | NM_024074    | TMEM38A  |
| 1.49E+08 | 1.49E+08 | + | NM_024028    | PCYOX1L  |
| 2.04E+08 | 2.04E+08 | - | NM_014935    | PLEKHA6  |
| 77385245 | 77395179 | - | NM_015975    | TAF9B    |
| 1.46E+08 | 1.46E+08 | - | NM_021105    | PLSCR1   |
| 92728831 | 92747336 | - | NM_017654    | SAMD9    |
| 1.24E+08 | 1.24E+08 | + | NM_002006    | FGF2     |
| 58938903 | 58976060 | + | NM_015177    | DTX4     |
| 44319619 | 44343448 | + | NM_025225    | PNPLA3   |
| 1.4E+08  | 1.4E+08  | - | NM_001945    | HBEGF    |
| 54094757 | 54209714 | - | NM_017848    | FAM120C  |
| 7247150  | 7261793  | - | NM_016546    | C1RL     |
| 26900133 | 26903951 | - | NM_005165    | ALDOC    |

|          |          |   |              |          |
|----------|----------|---|--------------|----------|
| 2.31E+08 | 2.31E+08 | - | NM_080424    | SP110    |
| 1.41E+08 | 1.41E+08 | + | NM_018934    | PCDHB14  |
| 1.92E+08 | 1.92E+08 | - | NM_007315    | STAT1    |
| 42733950 | 42780869 | + | NM_002463    | MX2      |
| 6532464  | 6645692  | - | NM_000170    | GLDC     |
| 1.83E+08 | 1.83E+08 | - | NM_015039    | NMNAT2   |
| 937540   | 994285   | - | NM_006869    | ADAP1    |
| 40610862 | 40674597 | + | NM_001130020 | ATP6V0A1 |
| 30960415 | 30966259 | + | NM_152288    | ORAI3    |
| 27805893 | 27845963 | + | NM_032434    | ZNF512   |
| 67777790 | 67796743 | + | NM_000694    | ALDH3B1  |
| 6585850  | 6591163  | - | NM_001252    | CD70     |
| 1.07E+08 | 1.07E+08 | + | NM_152772    | TCP11L2  |
| 18632758 | 18660164 | + | NM_017414    | USP18    |
| 1.32E+08 | 1.32E+08 | - | NM_000755    | CRAT     |
| 50474422 | 50528581 | + | NM_003645    | SLC27A2  |
| 1852317  | 1858751  | + | NM_138567    | SYT8     |
| 20353163 | 20370848 | - | NM_001042685 | LGALS9B  |
| 96671197 | 96710789 | + | NM_000623    | BDKRB2   |
| 2.07E+08 | 2.07E+08 | + | NM_182663    | RASSF5   |
| 1.11E+08 | 1.11E+08 | - | NM_004772    | C5orf13  |
| 1.45E+08 | 1.45E+08 | + | NM_006472    | TXNIP    |
| 7168017  | 7178336  | + | NM_201442    | C1S      |
| 15163015 | 15166900 | + | NM_012114    | CASP14   |
| 3728374  | 3750810  | + | NM_014428    | TJP3     |
| 48432427 | 48470513 | - | NM_016132    | MYEF2    |
| 39669997 | 39678665 | - | NM_002275    | KRT15    |
| 10381764 | 10397291 | + | NM_000201    | ICAM1    |
| 13357737 | 13461809 | - | NM_024923    | NUP210   |
| 26440763 | 26453650 | + | NM_006994    | BTN3A3   |
| 88718385 | 88723017 | + | NM_003087    | SNCG     |
| 21754795 | 21756030 | + | NM_004807    | HS6ST1   |
| 24171567 | 24194784 | - | NM_000147    | FUCA1    |
| 61583749 | 61634825 | + | NM_004265    | FADS2    |
| 30194914 | 30200397 | + | NM_007074    | CORO1A   |
| 2198637  | 2204640  | + | NM_014353    | RAB26    |
| 6939702  | 6943281  | + | NM_201566    | SLC16A13 |
| 89518001 | 89531043 | - | NM_002053    | GBP1     |
| 1635659  | 1748291  | - | NM_012293    | PXDN     |
| 70847828 | 70864567 | + | NM_002727    | SRGN     |
| 94929162 | 94938296 | + | NM_001161778 | PDP1     |
| 95657864 | 95786202 | - | NM_024734    | CLMN     |
| 36606689 | 36688436 | + | NM_004172    | SLC1A3   |
| 15260717 | 15374304 | - | NM_032918    | RERG     |
| 56735381 | 56753909 | - | NM_005419    | STAT2    |
| 1.4E+08  | 1.4E+08  | - | NM_006079    | CITED2   |
| 46967117 | 47010082 | - | NM_153840    | GPR110   |
| 29910330 | 29913550 | + | NM_002116    | HLA-A    |
| 1.1E+08  | 1.1E+08  | - | NM_002959    | SORT1    |
| 33462745 | 33515765 | + | NM_018677    | ACSS2    |
| 26726049 | 26733228 | - | NM_080669    | SLC46A1  |
| 11453452 | 11462545 | - | NM_198536    | TMEM205  |

|          |          |   |              |           |
|----------|----------|---|--------------|-----------|
| 61322431 | 61329127 | - | NM_006919    | SERPINB3  |
| 57749809 | 57756087 | - | NM_006622    | PLK2      |
| 58223309 | 58280461 | + | NM_020676    | ABHD6     |
| 80371854 | 80548667 | - | NM_006379    | SEMA3C    |
| 42032751 | 42065194 | - | NM_000930    | PLAT      |
| 2.03E+08 | 2.03E+08 | - | NM_001276    | CHI3L1    |
| 7760441  | 7941586  | - | NM_198595    | AFAP1     |
| 29691237 | 29694289 | + | NM_018950    | HLA-F     |
| 72452148 | 72490126 | - | NM_001012642 | GRAMD2    |
| 75011883 | 75017877 | - | NM_000499    | CYP1A1    |
| 1.5E+08  | 1.5E+08  | - | NM_003548    | HIST2H4A  |
| 1.37E+08 | 1.37E+08 | - | NM_052962    | IL22RA2   |
| 5710919  | 5732093  | + | NM_006074    | TRIM22    |
| 35606783 | 35615228 | + | NM_021910    | FXD3      |
| 63661059 | 63856703 | + | NM_032199    | ARID5B    |
| 47572655 | 47592372 | + | NM_002507    | NGFR      |
| 1.52E+08 | 1.52E+08 | + | NM_020127    | TUFT1     |
| 2.39E+08 | 2.39E+08 | + | NM_001137550 | LRRFIP1   |
| 17513755 | 17516457 | - | NM_004335    | BST2      |
| 43747548 | 43751248 | - | NM_182517    | C1orf210  |
| 1.11E+08 | 1.11E+08 | - | NM_004696    | SLC16A4   |
| 1.34E+08 | 1.34E+08 | - | NM_145176    | SLC2A12   |
| 1.05E+08 | 1.05E+08 | + | AK131040     | LOC388022 |
| 6531020  | 6535933  | + | NM_003811    | TNFSF9    |
| 61254600 | 61266433 | + | NM_012397    | SERPINB13 |
| 37779996 | 37780913 | + | NM_181791    | GPR141    |
| 3000033  | 3050304  | + | NM_003324    | TULP3     |
| 18885330 | 18939294 | + | NM_001338    | CXADR     |
| 38599676 | 38613982 | + | NM_001552    | IGFBP4    |
| 35520347 | 35580176 | - | NM_015474    | SAMHD1    |
| 6658794  | 6678966  | + | NM_017523    | XAF1      |
| 1.42E+08 | 1.43E+08 | + | NM_015071    | ARHGAP26  |
| 42853050 | 42983478 | - | NM_153026    | PRICKLE1  |
| 30116131 | 30124878 | - | NM_024307    | GDPD3     |
| 94492724 | 94515276 | + | NM_023112    | OTUB2     |
| 1.22E+08 | 1.22E+08 | - | NM_019034    | RHOF      |
| 47314752 | 47621691 | - | NM_022748    | TNS3      |
| 32821935 | 32827628 | + | NM_002800    | PSMB9     |
| 47489240 | 47516423 | + | NM_178033    | CYP4X1    |
| 39436673 | 39451977 | + | NM_145298    | APOBEC3F  |
| 1.51E+08 | 1.51E+08 | - | NM_001447    | FAT2      |
| 1.36E+08 | 1.37E+08 | - | NM_004598    | SPOCK1    |
| 1.13E+08 | 1.13E+08 | + | NM_006187    | OAS3      |
| 94577079 | 94583033 | + | NM_001130080 | IFI27     |
| 1.8E+08  | 1.8E+08  | - | NM_005110    | GFPT2     |
| 1.83E+08 | 1.83E+08 | - | NM_014398    | LAMP3     |
| 1.24E+08 | 1.24E+08 | + | NM_007329    | DMBT1     |
| 1.57E+08 | 1.57E+08 | + | NM_001099287 | NIPAL4    |
| 1.1E+08  | 1.1E+08  | + | NM_000757    | CSF1      |
| 7187513  | 7245043  | - | NM_001733    | C1R       |
| 1.25E+08 | 1.25E+08 | + | NM_000962    | PTGS1     |
| 70346143 | 70499083 | + | NM_001034852 | SMOC1     |



|          |          |   |              |          |
|----------|----------|---|--------------|----------|
| 17393256 | 17445930 | - | NM_007365    | PADI2    |
| 89299891 | 89364249 | + | NM_017912    | HERC6    |
| 1.55E+08 | 1.55E+08 | + | NM_005542    | INSIG1   |
| 1.9E+08  | 1.9E+08  | - | NM_021101    | CLDN1    |
| 1.32E+08 | 1.32E+08 | - | NM_002198    | IRF1     |
| 1.63E+08 | 1.63E+08 | - | NM_022168    | IFIH1    |
| 49209056 | 49213919 | + | NM_173546    | KLHDC8B  |
| 1.31E+08 | 1.31E+08 | + | NM_005564    | LCN2     |
| 1.4E+08  | 1.4E+08  | - | NM_000591    | CD14     |
| 27180996 | 27183287 | - | NM_019102    | HOXA5    |
| 38201114 | 38203443 | + | NM_005318    | H1FO     |
| 63304280 | 63313930 | + | NM_004585    | RARRES3  |
| 35856991 | 35879705 | + | NM_002185    | IL7R     |
| 1.31E+08 | 1.31E+08 | - | NM_001018111 | PODXL    |
| 3208063  | 3219836  | - | NM_032034    | SLC4A11  |
| 64879356 | 64883828 | + | NM_003273    | TM7SF2   |
| 79115512 | 79129763 | + | NM_006417    | IFI44    |
| 1.69E+08 | 1.69E+08 | - | NM_017631    | DDX60    |
| 24630422 | 24636611 | + | NM_006084    | IRF9     |
| 54663846 | 54676944 | - | NM_001145303 | TMC4     |
| 1.25E+08 | 1.25E+08 | - | NM_058229    | FBXO32   |
| 1.14E+08 | 1.14E+08 | + | NM_016234    | ACSL5    |
| 76954835 | 76957352 | - | NM_005409    | CXCL11   |
| 31430959 | 31433586 | + | NM_006674    | HCP5     |
| 49842638 | 49851423 | - | NM_003335    | UBA7     |
| 89378268 | 89427314 | + | NM_016323    | HERC5    |
| 76011751 | 76031595 | + | NM_001992    | F2R      |
| 18496968 | 18499987 | + | NM_004864    | GDF15    |
| 57653958 | 57698944 | + | NM_201524    | GPR56    |
| 1.16E+08 | 1.16E+08 | + | NM_007231    | SLC6A14  |
| 41158814 | 41166473 | + | NM_005533    | IFI35    |
| 32455300 | 32526322 | - | NM_014314    | DDX58    |
| 1.51E+08 | 1.51E+08 | - | NM_003944    | SELENBP1 |
| 1.22E+08 | 1.22E+08 | - | NM_031458    | PARP9    |
| 36756863 | 36793700 | - | NM_004613    | TGM2     |
| 27454434 | 27472371 | - | NM_001831    | CLU      |
| 38294650 | 38303292 | - | NM_000104    | CYP1B1   |
| 66429144 | 66551435 | - | NM_015541    | LRIG1    |
| 42410390 | 42659110 | - | NM_006095    | ATP8A1   |
| 71392620 | 71424336 | + | NM_001740    | CALB2    |
| 7348380  | 7361026  | + | NM_000747    | CHRNB1   |
| 2.02E+08 | 2.02E+08 | + | NM_001114309 | ELF3     |
| 31913999 | 31918422 | + | NM_001710    | CFB      |
| 17575593 | 17610728 | + | NM_016233    | PADI3    |
| 34198495 | 34207377 | - | NM_002985    | CCL5     |
| 79086116 | 79108484 | + | NM_006820    | IFI44L   |
| 72356367 | 72374963 | - | NM_019885    | CYP26B1  |
| 92759368 | 92777680 | - | NM_152703    | SAMD9L   |
| 1.13E+08 | 1.13E+08 | + | NM_016816    | OAS1     |
| 313853   | 315272   | + | NM_003641    | IFITM1   |
| 1.3E+08  | 1.3E+08  | + | NM_016352    | CPA4     |
| 1.72E+08 | 1.72E+08 | - | NM_003810    | TNFSF10  |

|          |          |   |              |         |
|----------|----------|---|--------------|---------|
| 1.04E+08 | 1.04E+08 | + | NM_006291    | TNFAIP2 |
| 91061712 | 91069033 | + | NM_001547    | IFIT2   |
| 1.21E+08 | 1.21E+08 | - | NM_003733    | OASL    |
| 91087651 | 91100728 | + | NM_001031683 | IFIT3   |
| 10310900 | 10324737 | - | NM_002543    | OLR1    |
| 76942273 | 76944650 | - | NM_001565    | CXCL10  |
| 7017796  | 7038370  | + | NM_080657    | RSAD2   |
| 33441152 | 33447609 | - | NM_004925    | AQP3    |
| 1.13E+08 | 1.13E+08 | + | NM_002535    | OAS2    |
| 52769988 | 52790524 | - | NM_000782    | CYP24A1 |
| 91152303 | 91163745 | + | NM_001548    | IFIT1   |

| geneDescr                                    | mRNAid       |
|----------------------------------------------|--------------|
| pancreatic lipase-related protein 3          | NM_001011709 |
| sodium channel, nonvoltage-gated 1, gamma    | NM_001039    |
| inscuteable homolog (Drosophila)             | NM_001031853 |
| chloride intracellular channel 2             | NM_001289    |
| serpin peptidase inhibitor, clade A (alpha1) | NM_001085    |
| lipoma HMGIC fusion partner                  | NM_005780    |
| keratin 14                                   | NM_000526    |
| fibronectin leucine rich transmembrane       | NM_198391    |
| angiopoietin-like 4                          | NM_139314    |
| serpin peptidase inhibitor, clade E (nexin)  | NM_000602    |
| NA                                           | NM_054031.2  |
| solute carrier family 26 (sulfate transpo    | NM_000112    |
| decorin                                      | NM_001920    |
| delta/notch-like EGF repeat containing       | NM_139072    |
| transgelin                                   | NM_001001522 |
| cyclin A1                                    | NM_003914    |
| phospholipase D family, member 5             | NM_152666    |
| hydroxysteroid (17-beta) dehydrogenas        | NM_002153    |
| peptidase inhibitor 3, skin-derived          | NM_002638    |
| inhibitor of DNA binding 2, dominant n       | NM_002166    |
| syndecan binding protein (syntenin) 2        | NM_080489    |
| membrane metallo-endopeptidase               | NM_007288    |
| fibronectin 1                                | NM_212482    |
| latent transforming growth factor beta       | NM_206943    |
| aldehyde oxidase 1                           | NM_001159    |
| N-myc downstream regulated 1                 | NM_001135242 |
| cytochrome P450, family 4, subfamily F       | NM_021187    |
| serpin peptidase inhibitor, clade B (oval    | NM_001143818 |
| small proline-rich protein 1B (cornifin)     | NM_003125    |
| fatty acid binding protein 5 (psoriasis-a:   | NM_001444    |
| neuronal cell adhesion molecule              | NM_001037132 |
| transmembrane protein 66                     | NM_016127    |
| chromosome 10 open reading frame 58          | NM_032333    |
| actin binding LIM protein family, memk       | NM_014945    |
| chemokine (C-C motif) ligand 20              | NM_004591    |
| fibroblast activation protein, alpha         | NM_004460    |
| snail homolog 2 (Drosophila)                 | NM_003068    |
| regulator of G-protein signaling 2, 24kD     | NM_002923    |
| keratin 6B                                   | NM_005555    |
| G protein-coupled receptor 64                | NM_001079858 |
| cullin 4B                                    | NM_001079872 |
| mal, T-cell differentiation protein-like     | NM_005434    |
| dual specificity phosphatase 1               | NM_004417    |
| COP9 constitutive photomorphogenic           | NM_198189    |
| BMP and activin membrane-bound inhi          | NM_012342    |
| transcription factor CP2-like 1              | NM_014553    |
| smoothelin                                   | NM_134269    |
| calmodulin regulated spectrin-associat       | NM_203459    |
| family with sequence similarity 172, m       | AK127584     |
| neuron navigator 3                           | NM_014903    |
| centrosomal protein 170kDa-like              | NR_003135    |

|                                                  |              |
|--------------------------------------------------|--------------|
| ring finger protein 125                          | NM_017831    |
| potassium inwardly-rectifying channel, NM_002243 |              |
| retinoic acid early transcript 1E                | NM_139165    |
| arachidonate 15-lipoxygenase, type B             | NM_001141    |
| keratin 6A                                       | NM_005554    |
| transmembrane and tetratricopeptide r            | NM_175861    |
| hypothetical LOC80154                            | NR_026811    |
| pleckstrin homology domain containin             | NM_021622    |
| protein phosphatase 2, regulatory subu           | NM_020416    |
| dual specificity phosphatase 10                  | NM_007207    |
| LATS, large tumor suppressor, homolog            | NM_004690    |
| transglutaminase 1 (K polypeptide epid           | NM_000359    |
| centromere protein E, 312kDa                     | NM_001813    |
| collagen and calcium binding EGF dom             | NM_133459    |
| thrombospondin 1                                 | NM_003246    |
| serum amyloid A1                                 | NM_000331    |
| period homolog 1 (Drosophila)                    | NM_002616    |
| MAP/microtubule affinity-regulating ki           | NM_018650    |
| 5'-nucleotidase, ecto (CD73)                     | NM_002526    |
| tetraspanin 7                                    | NM_004615    |
| chromosome 11 open reading frame 82              | NM_145018    |
| follistatin-like 3 (secreted glycoprotein)       | NM_005860    |
| S100 calcium binding protein P                   | NM_005980    |
| ATP-binding cassette, sub-family C (CFTI         | NM_005845    |
| hect domain and RLD 3                            | NM_014606    |
| tubulin, alpha 1a                                | NM_006009    |
| epithelial mitogen homolog (mouse)               | NM_001013442 |
| phosphoinositide-3-kinase, regulatory s          | NM_181523    |
| centrosomal protein 170kDa                       | NM_014812    |
| lysosomal protein transmembrane 5                | NM_006762    |
| homer homolog 2 (Drosophila)                     | NM_199330    |
| excision repair cross-complementing rc           | NM_000124    |
| NIMA (never in mitosis gene a)-related k         | NM_133494    |
| anoctamin 10                                     | NM_018075    |
| leucine rich repeat containing 8 family,         | NM_032270    |
| prostate collagen triple helix                   | NM_001014442 |
| twinfilin, actin-binding protein, homol          | NM_002822    |
| phosphotyrosine interaction domain cc            | NM_017933    |
| Rho GTPase activating protein 42                 | NM_152432    |
| holocytochrome c synthase                        | NM_005333    |
| aldehyde dehydrogenase 1 family, mem             | NM_001034173 |
| v-ral simian leukemia viral oncogene ho          | NM_002881    |
| CMT1A duplicated region transcript 1             | NM_006382    |
| WD repeat domain 69                              | NM_178821    |
| spectrin, beta, non-erythrocytic 1               | NM_003128    |
| glucose-6-phosphate dehydrogenase                | NM_000402    |
| chromosome 6 open reading frame 48               | NM_001040437 |
| TRAF-type zinc finger domain containin           | NM_001143906 |
| replication factor C (activator 1) 1, 145        | L23320       |
| PHD finger protein 11                            | NM_001040443 |
| transforming growth factor, beta recep           | NM_003243    |
| lymphocyte antigen 6 complex, locus E            | NM_002346    |

interferon-induced protein with tetratr NM\_012420  
tsukushi small leucine rich proteoglyca NM\_015516  
bradykinin receptor B1 NM\_000710  
fatty acid synthase NM\_004104  
karyopherin alpha 5 (importin alpha 6) NM\_002269  
chemokine (C-X-C motif) ligand 1 (melar NM\_001511  
CD99 molecule-like 2 NM\_031462  
tetraspanin 15 NM\_012339  
transmembrane channel-like 5 NM\_001105248  
ubiquitin-conjugating enzyme E2L 6 NM\_004223  
DEAD (Asp-Glu-Ala-Asp) box polypeptid NM\_001012967  
dehydrogenase/reductase (SDR family) r NM\_004753  
lectin, galactoside-binding, soluble, 3 b NM\_005567  
solute carrier family 22, member 18 NM\_002555  
latrophilin 1 NM\_001008701  
proline rich 15 NM\_175887  
dual specificity phosphatase 4 NM\_001394  
cyclin-dependent kinase 18 NM\_212503  
tubulointerstitial nephritis antigen-like NM\_022164  
deltex 3-like (Drosophila) NM\_138287  
tetraspanin 18 NM\_130783  
phospholipase C, delta 4 NM\_032726  
FYN binding protein NM\_001465  
periplakin NM\_002705  
homeobox A4 NM\_002141  
keratin 8 NM\_002273  
chloride channel 6 NM\_001286  
metastasis associated lung adenocarcin BC018448  
latent transforming growth factor beta NM\_001130144  
cytoplasmic polyadenylation element k NM\_182485  
solute carrier family 29 (nucleoside trar NM\_001532  
ubiquitin interaction motif containing AF284753  
zinc finger protein 774 NM\_001004309  
solute carrier family 45, member 4 NM\_001080431  
thiamine triphosphatase NM\_024328  
transcription elongation factor A (SII), 2 NM\_198723  
plasma membrane proteolipid (plasmol NM\_015993  
cyclin J-like NM\_024565  
homeobox A2 NM\_006735  
transmembrane protein 38A NM\_024074  
prenylcysteine oxidase 1 like NM\_024028  
pleckstrin homology domain containin NM\_014935  
TAF9B RNA polymerase II, TATA box bin NM\_015975  
phospholipid scramblase 1 NM\_021105  
sterile alpha motif domain containing 9 NM\_017654  
fibroblast growth factor 2 (basic) NM\_002006  
deltex homolog 4 (Drosophila) NM\_015177  
patatin-like phospholipase domain con NM\_025225  
heparin-binding EGF-like growth factor NM\_001945  
family with sequence similarity 120C NM\_017848  
complement component 1, r subcomp NM\_016546  
aldolase C, fructose-bisphosphate NM\_005165

|                                                     |              |
|-----------------------------------------------------|--------------|
| SP110 nuclear body protein                          | NM_080424    |
| protocadherin beta 14                               | NM_018934    |
| signal transducer and activator of trans            | NM_007315    |
| myxovirus (influenza virus) resistance 2            | NM_002463    |
| glycine dehydrogenase (decarboxylati                | NM_000170    |
| nicotinamide nucleotide adenyltrans                 | NM_015039    |
| ArfGAP with dual PH domains 1                       | NM_006869    |
| ATPase, H <sup>+</sup> transporting, lysosomal VO s | NM_001130020 |
| ORAI calcium release-activated calcium              | NM_152288    |
| zinc finger protein 512                             | NM_032434    |
| aldehyde dehydrogenase 3 family, mem                | NM_000694    |
| CD70 molecule                                       | NM_001252    |
| t-complex 11 (mouse)-like 2                         | NM_152772    |
| ubiquitin specific peptidase 18                     | NM_017414    |
| carnitine O-acetyltransferase                       | NM_000755    |
| solute carrier family 27 (fatty acid trans          | NM_003645    |
| synaptotagmin VIII                                  | NM_138567    |
| lectin, galactoside-binding, soluble, 9B            | NM_001042685 |
| bradykinin receptor B2                              | NM_000623    |
| Ras association (RalGDS/AF-6) domain f              | NM_182663    |
| chromosome 5 open reading frame 13                  | NM_004772    |
| thioredoxin interacting protein                     | NM_006472    |
| complement component 1, s subcomp                   | NM_201442    |
| caspace 14, apoptosis-related cysteine p            | NM_012114    |
| tight junction protein 3 (zona occluden             | NM_014428    |
| myelin expression factor 2                          | NM_016132    |
| keratin 15                                          | NM_002275    |
| intercellular adhesion molecule 1                   | NM_000201    |
| nucleoporin 210kDa                                  | NM_024923    |
| butyrophilin, subfamily 3, member A3                | NM_006994    |
| synuclein, gamma (breast cancer-specifi             | NM_003087    |
| heparan sulfate 6-O-sulfotransferase 1              | NM_004807    |
| fucosidase, alpha-L- 1, tissue                      | NM_000147    |
| fatty acid desaturase 2                             | NM_004265    |
| coronin, actin binding protein, 1A                  | NM_007074    |
| RAB26, member RAS oncogene family                   | NM_014353    |
| solute carrier family 16, member 13 (m              | NM_201566    |
| guanylate binding protein 1, interferon             | NM_002053    |
| peroxidasin homolog (Drosophila)                    | NM_012293    |
| serglycin                                           | NM_002727    |
| pyruvate dehydrogenase phosphatase ca               | NM_001161778 |
| calmin (calponin-like, transmembrane)               | NM_024734    |
| solute carrier family 1 (glial high affinity        | NM_004172    |
| RAS-like, estrogen-regulated, growth in             | NM_032918    |
| signal transducer and activator of trans            | NM_005419    |
| Cbp/p300-interacting transactivator, w              | NM_006079    |
| G protein-coupled receptor 110                      | NM_153840    |
| major histocompatibility complex, clas              | NM_002116    |
| sortilin 1                                          | NM_002959    |
| acyl-CoA synthetase short-chain family              | NM_018677    |
| solute carrier family 46 (folate transpor           | NM_080669    |
| transmembrane protein 205                           | NM_198536    |

serpin peptidase inhibitor, clade B (ovalin) NM\_006919  
 polo-like kinase 2 (Drosophila) NM\_006622  
 abhydrolase domain containing 6 NM\_020676  
 sema domain, immunoglobulin domain NM\_006379  
 plasminogen activator, tissue NM\_000930  
 chitinase 3-like 1 (cartilage glycoprotein 3) NM\_001276  
 actin filament associated protein 1 NM\_198595  
 major histocompatibility complex, class II, DRB1 NM\_018950  
 GRAM domain containing 2 NM\_001012642  
 cytochrome P450, family 1, subfamily 1, polypeptide 1 NM\_000499  
 histone cluster 2, H4a NM\_003548  
 interleukin 22 receptor, alpha 2 NM\_052962  
 tripartite motif-containing 22 NM\_006074  
 FXYD domain containing ion transport regulator 10 NM\_021910  
 AT rich interactive domain 5B (MRF1-like) NM\_032199  
 nerve growth factor receptor NM\_002507  
 tuftelin 1 NM\_020127  
 leucine rich repeat (in FLII) interacting protein 1 NM\_001137550  
 bone marrow stromal cell antigen 2 NM\_004335  
 chromosome 1 open reading frame 210 NM\_182517  
 solute carrier family 16, member 4 (monocarboxylate transporter) NM\_004696  
 solute carrier family 2 (facilitated glucose transporter) NM\_145176  
 hypothetical gene supported by AK131040 AK131040  
 tumor necrosis factor (ligand) superfamily 1 member 1 NM\_003811  
 serpin peptidase inhibitor, clade B (ovalin) NM\_012397  
 G protein-coupled receptor 141 NM\_181791  
 tubby like protein 3 NM\_003324  
 coxsackievirus and adenovirus receptor NM\_001338  
 insulin-like growth factor binding protein 3 NM\_001552  
 SAM domain and HD domain 1 NM\_015474  
 XIAP associated factor 1 NM\_017523  
 Rho GTPase activating protein 26 NM\_015071  
 prickle homolog 1 (Drosophila) NM\_153026  
 glycerophosphodiester phosphodiesterase 3B NM\_024307  
 OTU domain, ubiquitin aldehyde binding 1 NM\_023112  
 ras homolog gene family, member F (in rat) NM\_019034  
 tensin 3 NM\_022748  
 proteasome (prosome, macropain) subunit type 1B (beta 5) NM\_002800  
 cytochrome P450, family 4, subfamily 1, polypeptide 1 NM\_178033  
 apolipoprotein B mRNA editing enzyme, complex 1 NM\_145298  
 FAT tumor suppressor homolog 2 (Drosophila) NM\_001447  
 sparc/osteonectin, cwcv and kazal-like connective tissue protein-like domain containing 1 NM\_004598  
 2'-5'-oligoadenylate synthetase 3, 100kDa NM\_006187  
 interferon, alpha-inducible protein 27 NM\_001130080  
 glutamine-fructose-6-phosphate transaminase 2 NM\_005110  
 lysosomal-associated membrane protein 1 NM\_014398  
 deleted in malignant brain tumors 1 NM\_007329  
 NIPA-like domain containing 4 NM\_001099287  
 colony stimulating factor 1 (macrophage) NM\_000757  
 complement component 1, r subcomponent NM\_001733  
 prostaglandin-endoperoxide synthase 1 NM\_000962  
 SPARC related modular calcium binding protein 1 NM\_001034852

|                                           |              |
|-------------------------------------------|--------------|
| peptidyl arginine deiminase, type II      | NM_007365    |
| hect domain and RLD 6                     | NM_017912    |
| insulin induced gene 1                    | NM_005542    |
| claudin 1                                 | NM_021101    |
| interferon regulatory factor 1            | NM_002198    |
| interferon induced with helicase C dom    | NM_022168    |
| kelch domain containing 8B                | NM_173546    |
| lipocalin 2                               | NM_005564    |
| CD14 molecule                             | NM_000591    |
| homeobox A5                               | NM_019102    |
| H1 histone family, member 0               | NM_005318    |
| retinoic acid receptor responder (tazarc  | NM_004585    |
| interleukin 7 receptor                    | NM_002185    |
| podocalyxin-like                          | NM_001018111 |
| solute carrier family 4, sodium borate t  | NM_032034    |
| transmembrane 7 superfamily member        | NM_003273    |
| interferon-induced protein 44             | NM_006417    |
| DEAD (Asp-Glu-Ala-Asp) box polypeptid     | NM_017631    |
| interferon regulatory factor 9            | NM_006084    |
| transmembrane channel-like 4              | NM_001145303 |
| F-box protein 32                          | NM_058229    |
| acyl-CoA synthetase long-chain family n   | NM_016234    |
| chemokine (C-X-C motif) ligand 11         | NM_005409    |
| HLA complex P5                            | NM_006674    |
| ubiquitin-like modifier activating enzym  | NM_003335    |
| hect domain and RLD 5                     | NM_016323    |
| coagulation factor II (thrombin) recept   | NM_001992    |
| growth differentiation factor 15          | NM_004864    |
| G protein-coupled receptor 56             | NM_201524    |
| solute carrier family 6 (amino acid trans | NM_007231    |
| interferon-induced protein 35             | NM_005533    |
| DEAD (Asp-Glu-Ala-Asp) box polypeptid     | NM_014314    |
| selenium binding protein 1                | NM_003944    |
| poly (ADP-ribose) polymerase family, m    | NM_031458    |
| transglutaminase 2 (C polypeptide, pro    | NM_004613    |
| clusterin                                 | NM_001831    |
| cytochrome P450, family 1, subfamily E    | NM_000104    |
| leucine-rich repeats and immunoglobul     | NM_015541    |
| ATPase, aminophospholipid transporte      | NM_006095    |
| calbindin 2                               | NM_001740    |
| cholinergic receptor, nicotinic, beta 1 ( | NM_000747    |
| E74-like factor 3 (ets domain transcripti | NM_001114309 |
| complement factor B                       | NM_001710    |
| peptidyl arginine deiminase, type III     | NM_016233    |
| chemokine (C-C motif) ligand 5            | NM_002985    |
| interferon-induced protein 44-like        | NM_006820    |
| cytochrome P450, family 26, subfamily     | NM_019885    |
| sterile alpha motif domain containing 9   | NM_152703    |
| 2',5'-oligoadenylate synthetase 1, 40/4   | NM_016816    |
| interferon induced transmembrane pro      | NM_003641    |
| carboxypeptidase A4                       | NM_016352    |
| tumor necrosis factor (ligand) superfam   | NM_003810    |



tumor necrosis factor, alpha-induced p1 NM\_006291  
interferon-induced protein with tetratr NM\_001547  
2'-5'-oligoadenylate synthetase-like NM\_003733  
interferon-induced protein with tetratr NM\_001031683  
oxidized low density lipoprotein (lectin NM\_002543  
chemokine (C-X-C motif) ligand 10 NM\_001565  
radical S-adenosyl methionine domain NM\_080657  
aquaporin 3 (Gill blood group) NM\_004925  
2'-5'-oligoadenylate synthetase 2, 69/7: NM\_002535  
cytochrome P450, family 24, subfamily NM\_000782  
interferon-induced protein with tetratr NM\_001548

| Affyprobeset | logFC    | AveExpr  | t        | P.Value  | adj.P.Val | B        | chrom |
|--------------|----------|----------|----------|----------|-----------|----------|-------|
| 7994058      | 3.259902 | 7.144051 | 33.81682 | 5.01E-16 | 7.12E-13  | 26.81956 | chr16 |
| 7938652      | 3.054399 | 6.211258 | 25.93717 | 2.94E-14 | 1.89E-11  | 23.0174  | chr11 |
| 7930760      | 3.03941  | 6.92827  | 19.45659 | 2.30E-12 | 5.08E-10  | 18.73388 | chr10 |
| 7971150      | 2.783394 | 8.185145 | 25.84697 | 3.10E-14 | 1.93E-11  | 22.96624 | chr13 |
| 8176234      | 2.56775  | 6.70215  | 22.41051 | 2.72E-13 | 1.04E-10  | 20.85272 | chrX  |
| 7976496      | 2.551592 | 8.668408 | 18.97487 | 3.35E-12 | 6.97E-10  | 18.35666 | chr14 |
| 8180352      | 2.412076 | 7.437794 | 20.19941 | 1.31E-12 | 3.21E-10  | 19.29706 | --    |
| 8025402      | 2.398626 | 9.728415 | 48.27623 | 2.04E-18 | 1.35E-14  | 31.48009 | chr19 |
| 8015366      | 2.364188 | 8.974587 | 17.11455 | 1.56E-11 | 2.30E-09  | 16.80287 | chr17 |
| 8135069      | 2.271072 | 9.951843 | 41.85957 | 1.86E-17 | 6.15E-14  | 29.6903  | chr7  |
| 8065071      | 2.250517 | 6.912629 | 26.1596  | 2.58E-14 | 1.71E-11  | 23.14268 | chr20 |
| 8041383      | 2.219418 | 9.098152 | 22.454   | 2.64E-13 | 1.03E-10  | 20.88165 | chr2  |
| 7944082      | 2.173692 | 7.261786 | 18.01006 | 7.31E-12 | 1.29E-09  | 17.57092 | chr11 |
| 7965410      | 2.122587 | 5.078618 | 11.07684 | 8.45E-09 | 4.02E-07  | 10.34982 | chr12 |
| 8109194      | 2.0317   | 8.83712  | 28.50002 | 6.95E-15 | 5.64E-12  | 24.39066 | chr5  |
| 8153002      | 2.006203 | 9.229818 | 20.69967 | 9.05E-13 | 2.38E-10  | 19.66431 | chr8  |
| 8059580      | 1.908826 | 8.318168 | 38.87207 | 5.84E-17 | 1.16E-13  | 28.71769 | chr2  |
| 7997491      | 1.889973 | 6.628695 | 17.99232 | 7.42E-12 | 1.29E-09  | 17.55607 | chr16 |
| 8064418      | 1.854988 | 7.510201 | 27.17239 | 1.44E-14 | 9.90E-12  | 23.69806 | chr20 |
| 8058765      | 1.843669 | 8.28003  | 20.03863 | 1.48E-12 | 3.54E-10  | 19.17701 | chr2  |
| 7925511      | 1.776634 | 7.614241 | 16.99731 | 1.73E-11 | 2.44E-09  | 16.69939 | chr1  |
| 8040103      | 1.774345 | 6.867623 | 8.483186 | 3.09E-07 | 7.84E-06  | 6.618299 | chr2  |
| 7905553      | 1.709859 | 7.929826 | 14.34627 | 2.10E-10 | 1.79E-08  | 14.15499 | chr1  |
| 7968637      | 1.687024 | 8.067734 | 16.75621 | 2.14E-11 | 2.92E-09  | 16.48435 | chr13 |
| 8109093      | 1.616946 | 8.687533 | 25.42619 | 3.98E-14 | 2.20E-11  | 22.72489 | chr5  |
| 8047300      | 1.614569 | 6.62107  | 14.5568  | 1.70E-10 | 1.54E-08  | 14.37263 | chr2  |
| 8054872      | 1.606684 | 9.421506 | 11.33262 | 6.14E-09 | 3.13E-07  | 10.6799  | chr2  |
| 8083494      | 1.580533 | 6.565887 | 13.12512 | 7.62E-10 | 5.35E-08  | 12.83209 | chr3  |
| 8021635      | 1.56882  | 7.037106 | 9.17593  | 1.10E-07 | 3.37E-06  | 7.688815 | chr18 |
| 7990952      | 1.550929 | 7.514916 | 4.94963  | 0.000156 | 0.001395  | 0.193098 | chr15 |
| 8072413      | 1.517465 | 8.295545 | 21.48003 | 5.17E-13 | 1.61E-10  | 20.2189  | chr22 |
| 8142270      | 1.478296 | 6.010971 | 16.51673 | 2.65E-11 | 3.49E-09  | 16.26775 | chr7  |
| 8150698      | 1.454382 | 11.33301 | 25.52359 | 3.76E-14 | 2.14E-11  | 22.78116 | chr8  |
| 8004784      | 1.438567 | 8.598252 | 11.1869  | 7.36E-09 | 3.59E-07  | 10.4926  | chr17 |
| 8056257      | 1.420484 | 5.586128 | 9.334215 | 8.77E-08 | 2.81E-06  | 7.925413 | chr2  |
| 8062927      | 1.406158 | 9.142226 | 12.65571 | 1.28E-09 | 8.32E-08  | 12.29417 | chr20 |
| 8115831      | 1.391184 | 10.90346 | 34.66122 | 3.43E-16 | 5.68E-13  | 27.16145 | chr5  |
| 7962058      | 1.38778  | 9.227259 | 16.10523 | 3.85E-11 | 4.73E-09  | 15.88834 | chr12 |
| 8097058      | 1.38632  | 7.085243 | 7.440918 | 1.63E-06 | 3.13E-05  | 4.894133 | chr4  |
| 7908614      | 1.380633 | 10.13889 | 17.73361 | 9.21E-12 | 1.53E-09  | 17.33794 | chr1  |
| 7928695      | 1.379472 | 7.69591  | 18.84475 | 3.71E-12 | 7.54E-10  | 18.25308 | chr10 |
| 8020806      | 1.375683 | 6.272089 | 12.12569 | 2.36E-09 | 1.41E-07  | 11.66553 | chr18 |
| 7965979      | 1.349451 | 8.566055 | 12.21931 | 2.12E-09 | 1.30E-07  | 11.77827 | chr12 |
| 7963406      | 1.345424 | 10.38448 | 13.66822 | 4.25E-10 | 3.21E-08  | 13.4336  | chr12 |
| 8150089      | 1.295167 | 9.165451 | 14.936   | 1.17E-10 | 1.13E-08  | 14.75737 | chr8  |
| 8054479      | 1.290475 | 6.431752 | 17.05578 | 1.65E-11 | 2.35E-09  | 16.75108 | chr2  |
| 8012349      | 1.289714 | 7.625518 | 12.94937 | 9.25E-10 | 6.34E-08  | 12.6327  | chr17 |
| 8023575      | 1.288358 | 6.628152 | 14.07158 | 2.78E-10 | 2.26E-08  | 13.86657 | chr18 |
| 7957298      | 1.28452  | 6.748617 | 20.9607  | 7.49E-13 | 2.04E-10  | 19.85225 | chr12 |
| 7925525      | 1.282389 | 9.881416 | 8.960049 | 1.51E-07 | 4.35E-06  | 7.361397 | chr1  |
| 7963421      | 1.270883 | 11.75874 | 18.56034 | 4.66E-12 | 9.18E-10  | 18.02414 | chr12 |

|         |          |          |          |          |          |          |       |
|---------|----------|----------|----------|----------|----------|----------|-------|
| 8171624 | 1.269864 | 5.534783 | 12.5259  | 1.49E-09 | 9.43E-08 | 12.14234 | chrX  |
| 8105778 | 1.26881  | 9.916926 | 13.11757 | 7.68E-10 | 5.38E-08 | 12.82358 | chr5  |
| 8035095 | 1.265842 | 7.667298 | 14.68524 | 1.49E-10 | 1.40E-08 | 14.50398 | chr19 |
| 8086467 | 1.246515 | 8.780312 | 17.70474 | 9.44E-12 | 1.54E-09 | 17.31341 | chr3  |
| 7924450 | 1.245552 | 7.76435  | 18.43409 | 5.17E-12 | 9.88E-10 | 17.92136 | chr1  |
| 8106986 | 1.242917 | 7.364761 | 8.308043 | 4.05E-07 | 9.73E-06 | 6.338325 | chr5  |
| 7926875 | 1.232802 | 7.469252 | 18.29762 | 5.77E-12 | 1.08E-09 | 17.80947 | chr10 |
| 8049478 | 1.228012 | 8.412235 | 19.40871 | 2.39E-12 | 5.21E-10 | 18.69681 | chr2  |
| 8068583 | 1.211848 | 6.166796 | 10.05198 | 3.22E-08 | 1.23E-06 | 8.962834 | chr21 |
| 7972297 | 1.202358 | 8.314075 | 16.30677 | 3.20E-11 | 4.11E-09 | 16.07532 | chr13 |
| 7902874 | 1.186065 | 7.614246 | 17.09027 | 1.60E-11 | 2.32E-09 | 16.7815  | chr1  |
| 8030470 | 1.17047  | 8.911521 | 11.43814 | 5.39E-09 | 2.84E-07 | 10.81429 | chr19 |
| 8102076 | 1.168829 | 6.600881 | 8.668303 | 2.33E-07 | 6.21E-06 | 6.910066 | chr4  |
| 8171359 | 1.159749 | 7.148298 | 15.49505 | 6.80E-11 | 7.56E-09 | 15.30823 | chrX  |
| 8120967 | 1.139776 | 9.988328 | 22.92948 | 1.92E-13 | 8.13E-11 | 21.194   | chr6  |
| 8023995 | 1.139071 | 9.420652 | 19.71902 | 1.88E-12 | 4.40E-10 | 18.93535 | chr19 |
| 7931081 | 1.138219 | 9.274433 | 15.09554 | 9.98E-11 | 9.98E-09 | 14.91653 | chr10 |
| 7978222 | 1.132873 | 7.739253 | 11.49436 | 5.03E-09 | 2.69E-07 | 10.88548 | chr14 |
| 7933509 | 1.126023 | 7.648385 | 9.888357 | 4.03E-08 | 1.46E-06 | 8.731329 | chr10 |
| 7926368 | 1.123908 | 10.58667 | 12.81173 | 1.08E-09 | 7.17E-08 | 12.47487 | chr10 |
| 7908409 | 1.123785 | 7.935798 | 5.969145 | 2.18E-05 | 0.000271 | 2.213158 | chr1  |
| 8096385 | 1.122341 | 7.99344  | 8.047469 | 6.09E-07 | 1.39E-05 | 5.9146   | chr4  |
| 8172043 | 1.120441 | 9.595458 | 14.58958 | 1.64E-10 | 1.50E-08 | 14.40625 | chrX  |
| 7914270 | 1.113801 | 6.060835 | 9.882292 | 4.06E-08 | 1.47E-06 | 8.722693 | chr1  |
| 8107850 | 1.110182 | 5.670159 | 12.75933 | 1.14E-09 | 7.53E-08 | 12.4144  | chr5  |
| 7957890 | 1.109959 | 8.325349 | 7.222201 | 2.35E-06 | 4.29E-05 | 4.514191 | chr12 |
| 8130151 | 1.109123 | 7.661663 | 9.755637 | 4.84E-08 | 1.70E-06 | 8.541418 | chr6  |
| 8130116 | 1.096039 | 8.523785 | 13.92872 | 3.23E-10 | 2.57E-08 | 13.71451 | chr6  |
| 7982597 | 1.090024 | 11.43763 | 15.04812 | 1.05E-10 | 1.03E-08 | 14.86938 | chr15 |
| 8101828 | 1.074546 | 8.146677 | 12.03566 | 2.63E-09 | 1.54E-07 | 11.55643 | chr4  |
| 7968029 | 1.062534 | 5.761905 | 10.70164 | 1.36E-08 | 6.02E-07 | 9.854291 | chr13 |
| 8174794 | 1.061149 | 9.353678 | 21.15917 | 6.49E-13 | 1.84E-10 | 19.99349 | chrX  |
| 7909841 | 1.056361 | 6.402163 | 7.737184 | 1.00E-06 | 2.09E-05 | 5.398615 | chr1  |
| 8012197 | 1.053507 | 8.224739 | 11.89649 | 3.10E-09 | 1.76E-07 | 11.38638 | chr17 |
| 7991034 | 1.047592 | 7.249636 | 18.23194 | 6.09E-12 | 1.11E-09 | 17.75532 | chr15 |
| 8041995 | 1.046322 | 9.233703 | 14.89108 | 1.22E-10 | 1.17E-08 | 14.71227 | chr2  |
| 8099218 | 1.045347 | 6.454319 | 11.42615 | 5.47E-09 | 2.88E-07 | 10.79908 | chr4  |
| 8044919 | 1.045001 | 8.047794 | 18.4343  | 5.16E-12 | 9.88E-10 | 17.92153 | chr2  |
| 7943984 | 1.044741 | 7.28467  | 12.96552 | 9.09E-10 | 6.25E-08 | 12.65112 | chr11 |
| 7949971 | 1.034235 | 8.759826 | 11.5127  | 4.92E-09 | 2.64E-07 | 10.90864 | chr11 |
| 8005097 | 1.022599 | 7.149818 | 9.158303 | 1.13E-07 | 3.44E-06 | 7.662287 | chr17 |
| 8155930 | 1.012994 | 7.771715 | 15.80196 | 5.10E-11 | 5.82E-09 | 15.60269 | chr9  |
| 8143307 | 1.010494 | 8.976903 | 9.752312 | 4.86E-08 | 1.70E-06 | 8.536636 | chr7  |
| 8064904 | 1.004729 | 9.075991 | 9.305586 | 9.13E-08 | 2.88E-06 | 7.882834 | chr20 |
| 8169365 | 1.00255  | 8.161068 | 10.20471 | 2.62E-08 | 1.05E-06 | 9.17634  | chrX  |
| 8135955 | 1.002411 | 9.952531 | 21.67536 | 4.51E-13 | 1.47E-10 | 20.35436 | chr7  |
| 8138834 | 1.001551 | 8.682458 | 11.9602  | 2.87E-09 | 1.65E-07 | 11.46443 | chr7  |
| 8173041 | -1.00001 | 6.786961 | -7.65946 | 1.14E-06 | 2.31E-05 | 5.267395 | chrX  |
| 7923628 | -1.00104 | 6.7886   | -12.2129 | 2.14E-09 | 1.30E-07 | 11.77056 | chr1  |
| 8115584 | -1.00245 | 8.152332 | -16.2348 | 3.42E-11 | 4.31E-09 | 16.00881 | chr5  |
| 8180049 | -1.00274 | 8.706108 | -6.94031 | 3.81E-06 | 6.42E-05 | 4.015006 | chr6  |
| 8098006 | -1.00416 | 6.336849 | -14.6498 | 1.55E-10 | 1.43E-08 | 14.46786 | chr4  |

|         |          |          |          |          |          |          |       |
|---------|----------|----------|----------|----------|----------|----------|-------|
| 7918487 | -1.01242 | 7.666071 | -14.4725 | 1.85E-10 | 1.65E-08 | 14.28579 | chr1  |
| 8071861 | -1.01854 | 7.184431 | -11.7564 | 3.66E-09 | 2.03E-07 | 11.21347 | chr22 |
| 7928429 | -1.02091 | 9.479179 | -16.0887 | 3.91E-11 | 4.77E-09 | 15.87287 | chr10 |
| 8094169 | -1.02375 | 6.689482 | -9.66352 | 5.50E-08 | 1.88E-06 | 8.40847  | chr4  |
| 8108744 | -1.02679 | 6.52212  | -7.9727  | 6.86E-07 | 1.54E-05 | 5.791406 | chr5  |
| 7933933 | -1.02926 | 6.230899 | -7.81117 | 8.89E-07 | 1.90E-05 | 5.522794 | chr10 |
| 8110032 | -1.0301  | 7.371506 | -17.154  | 1.51E-11 | 2.29E-09 | 16.83754 | chr5  |
| 8073148 | -1.03017 | 9.305391 | -5.00834 | 0.000138 | 0.001266 | 0.312543 | chr22 |
| 8097256 | -1.03122 | 8.829471 | -21.0687 | 6.93E-13 | 1.91E-10 | 19.92925 | chr4  |
| 8040985 | -1.0323  | 8.454756 | -10.4134 | 1.99E-08 | 8.27E-07 | 9.464166 | chr2  |
| 7922756 | -1.03359 | 7.543204 | -11.7752 | 3.58E-09 | 2.01E-07 | 11.23686 | chr1  |
| 7950473 | -1.03438 | 7.463949 | -9.68847 | 5.31E-08 | 1.83E-06 | 8.444565 | chr11 |
| 7909188 | -1.03513 | 8.276377 | -12.0777 | 2.50E-09 | 1.48E-07 | 11.60749 | chr1  |
| 8007100 | -1.03683 | 7.639134 | -7.69262 | 1.08E-06 | 2.21E-05 | 5.323477 | chr17 |
| 7993638 | -1.03957 | 6.768968 | -14.5101 | 1.78E-10 | 1.60E-08 | 14.32463 | chr16 |
| 8109563 | -1.04595 | 7.142293 | -11.1347 | 7.85E-09 | 3.80E-07 | 10.42505 | chr5  |
| 7940565 | -1.04754 | 10.06137 | -10.2154 | 2.59E-08 | 1.04E-06 | 9.191129 | chr11 |
| 8008885 | -1.04795 | 7.375998 | -4.7121  | 0.000251 | 0.002078 | -0.29332 | chr17 |
| 7949619 | -1.05109 | 7.884934 | -17.1996 | 1.45E-11 | 2.22E-09 | 16.87753 | chr11 |
| 8026579 | -1.062   | 7.013069 | -15.3287 | 7.97E-11 | 8.43E-09 | 15.1463  | chr19 |
| 8111739 | -1.06298 | 7.145678 | -9.50134 | 6.91E-08 | 2.29E-06 | 8.172106 | chr5  |
| 7904726 | -1.06508 | 11.58722 | -16.7911 | 2.08E-11 | 2.85E-09 | 16.51566 | chr1  |
| 8139482 | -1.06566 | 6.97525  | -4.3417  | 0.000533 | 0.00387  | -1.06031 | chr7  |
| 8015337 | -1.0678  | 8.732588 | -8.34058 | 3.85E-07 | 9.35E-06 | 6.390623 | chr17 |
| 8001007 | -1.06919 | 8.825977 | -13.0249 | 8.51E-10 | 5.90E-08 | 12.71866 | chr16 |
| 7897774 | -1.06982 | 7.240362 | -15.3288 | 7.97E-11 | 8.43E-09 | 15.14644 | chr1  |
| 8070584 | -1.07066 | 5.724973 | -14.2804 | 2.25E-10 | 1.90E-08 | 14.08627 | chr21 |
| 8050102 | -1.0734  | 8.048978 | -15.821  | 5.01E-11 | 5.75E-09 | 15.62076 | chr2  |
| 8117435 | -1.07648 | 8.258879 | -12.2078 | 2.15E-09 | 1.30E-07 | 11.76447 | chr6  |
| 8055702 | -1.07676 | 8.172727 | -10.0795 | 3.11E-08 | 1.18E-06 | 9.001415 | chr2  |
| 8062041 | -1.0814  | 8.959658 | -7.76733 | 9.54E-07 | 2.02E-05 | 5.449304 | chr20 |
| 8018975 | -1.08149 | 11.41482 | -12.9234 | 9.52E-10 | 6.51E-08 | 12.60305 | chr17 |
| 8053648 | -1.08358 | 8.120483 | -5.00642 | 0.000139 | 0.00127  | 0.308642 | chr2  |
| 8164535 | -1.0908  | 7.175253 | -11.0154 | 9.13E-09 | 4.24E-07 | 10.26957 | chr9  |
| 7983650 | -1.09206 | 9.618208 | -13.3765 | 5.80E-10 | 4.22E-08 | 13.11325 | chr15 |
| 8129861 | -1.09263 | 9.778463 | -8.15179 | 5.17E-07 | 1.20E-05 | 6.085285 | chr6  |
| 7941961 | -1.09357 | 8.820723 | -11.3449 | 6.05E-09 | 3.09E-07 | 10.6956  | chr11 |
| 7976560 | -1.09414 | 8.151615 | -14.4363 | 1.92E-10 | 1.69E-08 | 14.24843 | chr14 |
| 8169504 | -1.09468 | 6.402955 | -10.036  | 3.29E-08 | 1.24E-06 | 8.940415 | chrX  |
| 7948274 | -1.09816 | 9.267354 | -12.7683 | 1.13E-09 | 7.48E-08 | 12.42475 | chr11 |
| 8044813 | -1.09984 | 6.114896 | -12.7923 | 1.10E-09 | 7.30E-08 | 12.45249 | chr2  |
| 8114805 | -1.10032 | 5.628079 | -11.0526 | 8.71E-09 | 4.08E-07 | 10.31815 | chr5  |
| 7953341 | -1.1033  | 8.267448 | -14.4404 | 1.91E-10 | 1.69E-08 | 14.2527  | chr12 |
| 8085431 | -1.11098 | 8.276315 | -10.5846 | 1.59E-08 | 6.89E-07 | 9.696828 | chr3  |
| 8068697 | -1.11127 | 6.740915 | -8.36286 | 3.72E-07 | 9.09E-06 | 6.426365 | chr21 |
| 8137680 | -1.11198 | 8.34588  | -9.73411 | 4.99E-08 | 1.74E-06 | 8.510427 | chr7  |
| 7961540 | -1.11489 | 7.182388 | -14.3912 | 2.01E-10 | 1.72E-08 | 14.20172 | chr12 |
| 8179326 | -1.11595 | 9.703837 | -10.4412 | 1.92E-08 | 8.00E-07 | 9.502061 | chr6  |
| 8057744 | -1.11894 | 11.22553 | -16.0352 | 4.11E-11 | 4.95E-09 | 15.82288 | chr2  |
| 8117458 | -1.12099 | 8.420651 | -12.06   | 2.55E-09 | 1.51E-07 | 11.58593 | chr6  |
| 7979658 | -1.12336 | 6.418003 | -8.88637 | 1.68E-07 | 4.78E-06 | 7.248389 | chr14 |
| 7981142 | -1.12395 | 8.672019 | -14.7198 | 1.44E-10 | 1.36E-08 | 14.53915 | chr14 |

|         |          |          |          |          |          |          |       |
|---------|----------|----------|----------|----------|----------|----------|-------|
| 7903188 | -1.12898 | 7.495006 | -9.70858 | 5.17E-08 | 1.79E-06 | 8.473622 | chr1  |
| 8059650 | -1.12956 | 8.380828 | -13.5442 | 4.84E-10 | 3.60E-08 | 13.29817 | chr2  |
| 8091715 | -1.14174 | 6.452614 | -9.05886 | 1.31E-07 | 3.85E-06 | 7.511937 | chr3  |
| 8064245 | -1.14467 | 8.482191 | -22.4546 | 2.64E-13 | 1.03E-10 | 20.88205 | chr20 |
| 8007228 | -1.14689 | 9.243748 | -11.5038 | 4.97E-09 | 2.67E-07 | 10.89738 | chr17 |
| 8025601 | -1.15509 | 8.971274 | -18.7072 | 4.14E-12 | 8.32E-10 | 18.1428  | chr19 |
| 8013616 | -1.15779 | 8.553768 | -17.4368 | 1.18E-11 | 1.84E-09 | 17.08378 | chr17 |
| 8177732 | -1.1672  | 10.59061 | -23.368  | 1.44E-13 | 6.23E-11 | 21.47585 | chr6  |
| 8129937 | -1.17082 | 9.237724 | -17.7961 | 8.74E-12 | 1.47E-09 | 17.39096 | chr6  |
| 7927732 | -1.17128 | 6.88799  | -12.3849 | 1.75E-09 | 1.09E-07 | 11.97584 | chr10 |
| 8099259 | -1.1726  | 8.559377 | -11.7712 | 3.60E-09 | 2.01E-07 | 11.23181 | chr4  |
| 7960757 | -1.17861 | 7.216153 | -22.1277 | 3.30E-13 | 1.18E-10 | 20.66311 | chr12 |
| 8034210 | -1.17957 | 10.04103 | -19.7708 | 1.81E-12 | 4.28E-10 | 18.9748  | chr19 |
| 8004266 | -1.18135 | 8.161153 | -11.2213 | 7.05E-09 | 3.47E-07 | 10.53695 | chr17 |
| 8103601 | -1.19307 | 7.728657 | -10.1791 | 2.72E-08 | 1.08E-06 | 9.140661 | chr4  |
| 8021470 | -1.20962 | 9.341977 | -7.24805 | 2.25E-06 | 4.14E-05 | 4.559426 | chr18 |
| 7905929 | -1.2109  | 7.719571 | -12.6845 | 1.24E-09 | 8.14E-08 | 12.32765 | chr1  |
| 7929072 | -1.22943 | 9.205829 | -22.2829 | 2.97E-13 | 1.09E-10 | 20.76747 | chr10 |
| 8138718 | -1.23569 | 7.741127 | -14.6985 | 1.48E-10 | 1.38E-08 | 14.51748 | chr7  |
| 8009243 | -1.23634 | 6.942211 | -10.6977 | 1.37E-08 | 6.04E-07 | 9.848963 | chr17 |
| 7990391 | -1.23635 | 5.968176 | -12.531  | 1.48E-09 | 9.40E-08 | 12.14838 | chr15 |
| 8067869 | -1.24003 | 7.345287 | -5.97582 | 2.15E-05 | 0.000269 | 2.225966 | chr21 |
| 8150509 | -1.24148 | 10.2331  | -15.962  | 4.39E-11 | 5.13E-09 | 15.75408 | chr8  |
| 7928046 | -1.24488 | 6.932726 | -17.4635 | 1.16E-11 | 1.81E-09 | 17.1068  | chr10 |
| 7928872 | -1.24576 | 8.819903 | -21.1879 | 6.36E-13 | 1.84E-10 | 20.0138  | chr10 |
| 7986004 | -1.26569 | 6.932219 | -9.62791 | 5.78E-08 | 1.96E-06 | 8.356822 | chr15 |
| 8115302 | -1.26645 | 8.807338 | -11.1963 | 7.27E-09 | 3.56E-07 | 10.50478 | chr5  |
| 8117476 | -1.26653 | 8.1718   | -14.6332 | 1.57E-10 | 1.44E-08 | 14.45087 | chr6  |
| 8073081 | -1.27111 | 8.927554 | -8.55734 | 2.76E-07 | 7.17E-06 | 6.735686 | chr22 |
| 8024687 | -1.27429 | 7.299527 | -11.9937 | 2.76E-09 | 1.60E-07 | 11.50533 | chr19 |
| 8071155 | -1.2751  | 9.640311 | -17.1281 | 1.55E-11 | 2.30E-09 | 16.81482 | chr22 |
| 7918323 | -1.27511 | 9.265853 | -14.5732 | 1.67E-10 | 1.52E-08 | 14.38945 | chr1  |
| 8104930 | -1.27918 | 9.234082 | -15.3342 | 7.93E-11 | 8.43E-09 | 15.15166 | chr5  |
| 8121632 | -1.28227 | 6.137163 | -10.5761 | 1.60E-08 | 6.95E-07 | 9.68537  | chr6  |
| 8147344 | -1.29104 | 10.02873 | -24.9505 | 5.32E-14 | 2.78E-11 | 22.44654 | chr8  |
| 8033241 | -1.29125 | 9.546705 | -13.7715 | 3.81E-10 | 2.93E-08 | 13.5455  | chr19 |
| 8073633 | -1.29209 | 7.006222 | -12.891  | 9.87E-10 | 6.68E-08 | 12.5659  | chr22 |
| 7915500 | -1.29458 | 6.835063 | -12.2107 | 2.14E-09 | 1.30E-07 | 11.76796 | chr1  |
| 7949410 | -1.29532 | 8.658591 | -6.73564 | 5.44E-06 | 8.64E-05 | 3.645816 | chr11 |
| 8095697 | -1.29621 | 10.10484 | -8.84422 | 1.79E-07 | 5.05E-06 | 7.183437 | chr4  |
| 8165703 | -1.29623 | 7.951672 | -5.77069 | 3.16E-05 | 0.000373 | 1.829641 | chrM  |
| 7912937 | -1.30356 | 6.134329 | -11.3187 | 6.24E-09 | 3.18E-07 | 10.66204 | chr1  |
| 7913694 | -1.30936 | 9.015707 | -17.9834 | 7.48E-12 | 1.29E-09 | 17.54857 | chr1  |
| 8176263 | -1.30954 | 8.881447 | -16.4286 | 2.87E-11 | 3.75E-09 | 16.1873  | chrX  |
| 7964119 | -1.31094 | 8.574789 | -15.6984 | 5.61E-11 | 6.27E-09 | 15.50396 | chr12 |
| 8175666 | -1.31493 | 6.263275 | -10.1678 | 2.76E-08 | 1.09E-06 | 9.124942 | chrX  |
| 7962375 | -1.3214  | 8.337273 | -13.9963 | 3.01E-10 | 2.42E-08 | 13.78667 | chr12 |
| 8080762 | -1.32179 | 8.188919 | -20.5953 | 9.76E-13 | 2.52E-10 | 19.58843 | chr3  |
| 7973427 | -1.33637 | 6.750898 | -12.4665 | 1.59E-09 | 1.00E-07 | 12.07246 | chr14 |
| 8013450 | -1.33776 | 7.557561 | -14.0647 | 2.80E-10 | 2.27E-08 | 13.85922 | chr17 |
| 8140534 | -1.33903 | 8.691797 | -18.2575 | 5.97E-12 | 1.10E-09 | 17.77644 | chr7  |
| 8113504 | -1.3409  | 7.983887 | -21.9901 | 3.63E-13 | 1.24E-10 | 20.56992 | chr5  |

|         |          |          |          |          |          |          |       |
|---------|----------|----------|----------|----------|----------|----------|-------|
| 7992518 | -1.34592 | 7.575584 | -12.8702 | 1.01E-09 | 6.81E-08 | 12.54212 | chr16 |
| 7969129 | -1.35204 | 7.868495 | -7.87588 | 8.01E-07 | 1.74E-05 | 5.630816 | chr13 |
| 8079733 | -1.36121 | 6.125235 | -15.2942 | 8.24E-11 | 8.67E-09 | 15.11247 | chr3  |
| 8091327 | -1.3763  | 9.724105 | -15.7248 | 5.48E-11 | 6.19E-09 | 15.52919 | chr3  |
| 8140967 | -1.38648 | 10.34795 | -18.9154 | 3.51E-12 | 7.20E-10 | 18.30938 | chr7  |
| 7953135 | -1.39849 | 8.458524 | -11.9424 | 2.93E-09 | 1.68E-07 | 11.44271 | chr12 |
| 8092348 | -1.40059 | 8.474058 | -15.2097 | 8.94E-11 | 9.16E-09 | 15.02943 | chr3  |
| 7990138 | -1.40413 | 7.431021 | -17.083  | 1.61E-11 | 2.32E-09 | 16.77509 | chr15 |
| 7917516 | -1.40834 | 10.17253 | -20.3096 | 1.21E-12 | 3.00E-10 | 19.37878 | chr1  |
| 8157650 | -1.40886 | 6.914788 | -9.94969 | 3.71E-08 | 1.37E-06 | 8.818448 | chr9  |
| 8066117 | -1.41078 | 10.3098  | -13.4164 | 5.55E-10 | 4.09E-08 | 13.15738 | chr20 |
| 7977270 | -1.41675 | 9.553815 | -10.9329 | 1.01E-08 | 4.63E-07 | 10.16131 | chr14 |
| 7958262 | -1.41811 | 7.597753 | -13.4587 | 5.31E-10 | 3.92E-08 | 13.20407 | chr12 |
| 8126820 | -1.42155 | 6.491672 | -18.0204 | 7.25E-12 | 1.29E-09 | 17.57955 | chr6  |
| 8001547 | -1.42915 | 8.648083 | -14.0791 | 2.76E-10 | 2.25E-08 | 13.87456 | chr16 |
| 8072926 | -1.4394  | 10.45198 | -20.7711 | 8.59E-13 | 2.31E-10 | 19.71602 | chr22 |
| 8139500 | -1.4406  | 8.120954 | -12.8464 | 1.04E-09 | 6.97E-08 | 12.51476 | chr7  |
| 8049528 | -1.44119 | 7.874861 | -8.6423  | 2.43E-07 | 6.43E-06 | 6.86933  | chr2  |
| 8131803 | -1.44186 | 5.914004 | -11.5354 | 4.78E-09 | 2.59E-07 | 10.93727 | chr7  |
| 7975390 | -1.4479  | 8.828375 | -14.9711 | 1.13E-10 | 1.10E-08 | 14.79251 | chr14 |
| 8023688 | -1.453   | 6.432531 | -10.8824 | 1.08E-08 | 4.88E-07 | 10.09478 | chr18 |
| 7943160 | -1.45415 | 6.701101 | -5.98651 | 2.11E-05 | 0.000266 | 2.246472 | chr11 |
| 7958895 | -1.45438 | 9.234291 | -13.758  | 3.86E-10 | 2.96E-08 | 13.53094 | chr12 |
| 7960744 | -1.4695  | 9.129743 | -13.9704 | 3.09E-10 | 2.48E-08 | 13.75901 | chr12 |
| 8179019 | -1.48479 | 9.355754 | -24.2478 | 8.22E-14 | 3.98E-11 | 22.0242  | chr6  |
| 8129848 | -1.48771 | 5.688899 | -15.0164 | 1.08E-10 | 1.06E-08 | 14.83779 | chr6  |
| 7905428 | -1.49723 | 8.419631 | -21.3669 | 5.60E-13 | 1.71E-10 | 20.13987 | chr1  |
| 8108873 | -1.50169 | 7.784911 | -18.4161 | 5.24E-12 | 9.93E-10 | 17.90662 | chr5  |
| 8067955 | -1.50372 | 9.184997 | -16.8495 | 1.97E-11 | 2.74E-09 | 16.56795 | chr21 |
| 7976425 | -1.50615 | 7.433822 | -16.8195 | 2.02E-11 | 2.80E-09 | 16.54107 | chr14 |
| 8021603 | -1.52441 | 6.777894 | -14.882  | 1.23E-10 | 1.17E-08 | 14.70318 | chr18 |
| 8027748 | -1.52698 | 11.26163 | -14.4423 | 1.91E-10 | 1.69E-08 | 14.25465 | chr19 |
| 8142981 | -1.53133 | 8.844124 | -13.8326 | 3.57E-10 | 2.78E-08 | 13.61137 | chr7  |
| 8035304 | -1.53457 | 10.80234 | -22.0936 | 3.38E-13 | 1.18E-10 | 20.64006 | chr19 |
| 8132347 | -1.53832 | 7.44373  | -15.3938 | 7.49E-11 | 8.14E-09 | 15.2099  | chr7  |
| 8129666 | -1.54178 | 6.319981 | -17.7131 | 9.37E-12 | 1.54E-09 | 17.32053 | chr6  |
| 8137526 | -1.54957 | 9.047962 | -33.1567 | 6.79E-16 | 8.73E-13 | 26.54464 | chr7  |
| 8114287 | -1.55092 | 6.74354  | -13.3434 | 6.01E-10 | 4.36E-08 | 13.07647 | chr5  |
| 8112202 | -1.55589 | 9.492864 | -20.387  | 1.14E-12 | 2.86E-10 | 19.43587 | chr5  |
| 7931108 | -1.55801 | 6.896418 | -11.3076 | 6.33E-09 | 3.21E-07 | 10.64785 | chr10 |
| 7938035 | -1.55834 | 9.928868 | -21.9309 | 3.78E-13 | 1.27E-10 | 20.52963 | chr11 |
| 7967202 | -1.56004 | 9.186629 | -27.8291 | 1.00E-14 | 7.38E-12 | 24.0455  | chr12 |
| 7903786 | -1.58163 | 8.798582 | -20.0372 | 1.48E-12 | 3.54E-10 | 19.1759  | chr1  |
| 8025053 | -1.61225 | 9.522353 | -18.2922 | 5.80E-12 | 1.08E-09 | 17.80501 | chr19 |
| 8096335 | -1.66329 | 10.00593 | -15.2286 | 8.78E-11 | 9.09E-09 | 15.04809 | chr4  |
| 8165672 | -1.66414 | 5.563598 | -6.97568 | 3.58E-06 | 6.11E-05 | 4.078221 | chrM  |
| 8179495 | -1.69146 | 9.770208 | -29.8768 | 3.37E-15 | 3.35E-12 | 25.06967 | chr6  |
| 8114612 | -1.69672 | 10.15692 | -17.1223 | 1.55E-11 | 2.30E-09 | 16.80973 | chr5  |
| 7919627 | -1.697   | 7.968548 | -8.61773 | 2.52E-07 | 6.63E-06 | 6.830769 | chr1  |
| 8000799 | -1.70024 | 7.597441 | -15.9525 | 4.43E-11 | 5.13E-09 | 15.74517 | chr16 |
| 8092726 | -1.70154 | 10.71196 | -38.8784 | 5.82E-17 | 1.16E-13 | 28.71986 | chr3  |
| 8138735 | -1.70283 | 9.425524 | -25.7321 | 3.32E-14 | 2.00E-11 | 22.90081 | chr7  |

|         |          |          |          |          |          |          |       |
|---------|----------|----------|----------|----------|----------|----------|-------|
| 7953603 | -1.7103  | 7.865802 | -17.5158 | 1.11E-11 | 1.76E-09 | 17.15185 | chr12 |
| 8039144 | -1.72355 | 7.907301 | -15.9807 | 4.32E-11 | 5.08E-09 | 15.77168 | chr19 |
| 8064613 | -1.73143 | 7.236308 | -20.6894 | 9.11E-13 | 2.38E-10 | 19.6569  | chr20 |
| 7976443 | -1.73313 | 11.87552 | -28.4639 | 7.09E-15 | 5.64E-12 | 24.37232 | chr14 |
| 7941148 | -1.74252 | 7.370589 | -21.8635 | 3.96E-13 | 1.31E-10 | 20.48364 | chr11 |
| 7918426 | -1.75179 | 7.849483 | -16.719  | 2.21E-11 | 2.99E-09 | 16.4509  | chr1  |
| 8114010 | -1.76451 | 7.917624 | -19.0378 | 3.19E-12 | 6.74E-10 | 18.40653 | chr5  |
| 7901272 | -1.7713  | 7.445535 | -17.974  | 7.54E-12 | 1.29E-09 | 17.54074 | chr1  |
| 8088642 | -1.79255 | 7.581469 | -17.7437 | 9.14E-12 | 1.53E-09 | 17.3465  | chr3  |
| 7930498 | -1.80359 | 7.295624 | -24.0686 | 9.20E-14 | 4.25E-11 | 21.91436 | chr10 |
| 8056285 | -1.8086  | 8.445627 | -14.1187 | 2.65E-10 | 2.21E-08 | 13.91638 | chr2  |
| 8149927 | -1.84697 | 8.354337 | -16.2491 | 3.38E-11 | 4.30E-09 | 16.02204 | chr8  |
| 8106393 | -1.85592 | 6.77654  | -19.525  | 2.18E-12 | 4.98E-10 | 18.78666 | chr5  |
| 8087485 | -1.87224 | 7.902189 | -14.4246 | 1.94E-10 | 1.69E-08 | 14.23633 | chr3  |
| 8116418 | -1.88711 | 7.090608 | -17.3836 | 1.24E-11 | 1.91E-09 | 17.03771 | chr5  |
| 7898431 | -1.88926 | 6.483198 | -15.334  | 7.93E-11 | 8.43E-09 | 15.15144 | chr1  |
| 7996081 | -1.89261 | 8.777688 | -17.575  | 1.05E-11 | 1.69E-09 | 17.20267 | chr16 |
| 7973618 | -1.92728 | 9.722014 | -19.0447 | 3.17E-12 | 6.74E-10 | 18.41197 | chr14 |
| 8103563 | -1.93822 | 9.206755 | -22.1112 | 3.34E-13 | 1.18E-10 | 20.65196 | chr4  |
| 8004416 | -1.94323 | 7.8694   | -33.0838 | 7.03E-16 | 8.73E-13 | 26.51386 | chr17 |
| 7919984 | -1.95578 | 8.578267 | -18.6554 | 4.32E-12 | 8.59E-10 | 18.10104 | chr1  |
| 8066214 | -1.97819 | 8.563213 | -23.9163 | 1.01E-13 | 4.58E-11 | 21.82025 | chr20 |
| 8004184 | -1.98579 | 7.122284 | -16.3083 | 3.20E-11 | 4.11E-09 | 16.07677 | chr17 |
| 8158167 | -1.98714 | 8.012954 | -23.4505 | 1.37E-13 | 6.04E-11 | 21.52824 | chr9  |
| 7997139 | -1.99243 | 6.455347 | -19.511  | 2.20E-12 | 4.98E-10 | 18.77588 | chr16 |
| 8023696 | -1.99254 | 7.761793 | -13.7443 | 3.92E-10 | 3.00E-08 | 13.51619 | chr18 |
| 8027002 | -1.99544 | 10.93833 | -49.6166 | 1.33E-18 | 1.32E-14 | 31.8099  | chr19 |
| 8100026 | -2.01078 | 6.596712 | -22.8482 | 2.03E-13 | 8.40E-11 | 21.14114 | chr4  |
| 8152703 | -2.04636 | 6.949538 | -35.4918 | 2.38E-16 | 4.30E-13 | 27.48747 | chr8  |
| 8096361 | -2.05536 | 7.979554 | -17.6199 | 1.01E-11 | 1.64E-09 | 17.24105 | chr4  |
| 8104901 | -2.09722 | 8.081989 | -22.3833 | 2.77E-13 | 1.04E-10 | 20.8346  | chr5  |
| 7940775 | -2.11254 | 7.381843 | -16.1177 | 3.81E-11 | 4.70E-09 | 15.9     | chr11 |
| 8007446 | -2.13116 | 10.28338 | -28.1209 | 8.54E-15 | 6.53E-12 | 24.19682 | chr17 |
| 7927964 | -2.13636 | 7.589865 | -12.902  | 9.75E-10 | 6.62E-08 | 12.5786  | chr10 |
| 8118111 | -2.16466 | 10.12601 | -22.6833 | 2.26E-13 | 9.19E-11 | 21.03317 | chr6  |
| 8051583 | -2.1859  | 9.699769 | -16.0022 | 4.23E-11 | 5.03E-09 | 15.79186 | chr2  |
| 8179351 | -2.19482 | 9.351359 | -21.3345 | 5.73E-13 | 1.73E-10 | 20.1171  | chr6  |
| 8160559 | -2.21478 | 10.37023 | -25.6781 | 3.43E-14 | 2.00E-11 | 22.8699  | chr9  |
| 8171472 | -2.26398 | 7.424512 | -10.3541 | 2.15E-08 | 8.87E-07 | 9.382846 | chrX  |
| 8052947 | -2.32172 | 6.953435 | -21.5292 | 5.00E-13 | 1.58E-10 | 20.2531  | chr2  |
| 8090018 | -2.33609 | 9.365539 | -29.3959 | 4.32E-15 | 3.91E-12 | 24.83683 | chr3  |
| 7902553 | -2.3867  | 8.597462 | -15.3798 | 7.59E-11 | 8.21E-09 | 15.19621 | chr1  |
| 7908793 | -2.47862 | 7.567431 | -21.589  | 4.79E-13 | 1.54E-10 | 20.29466 | chr1  |
| 8014316 | -2.53354 | 7.858205 | -28.8669 | 5.71E-15 | 4.94E-12 | 24.57537 | chr17 |
| 8101131 | -2.58315 | 7.907529 | -12.3963 | 1.73E-09 | 1.08E-07 | 11.98939 | chr4  |
| 7958884 | -2.60803 | 10.8873  | -43.0633 | 1.20E-17 | 5.53E-14 | 30.05523 | chr12 |
| 7902541 | -2.7555  | 11.15163 | -18.07   | 6.96E-12 | 1.26E-09 | 17.62092 | chr1  |
| 8140971 | -2.76005 | 8.737947 | -31.8529 | 1.26E-15 | 1.32E-12 | 25.98085 | chr7  |
| 7937335 | -2.7832  | 12.06271 | -61.8969 | 4.29E-20 | 8.53E-16 | 34.2866  | chr11 |
| 8136200 | -2.81218 | 7.191467 | -24.2068 | 8.43E-14 | 3.99E-11 | 21.99917 | chr7  |
| 7977046 | -2.95787 | 8.768185 | -27.6479 | 1.11E-14 | 7.86E-12 | 23.95061 | chr14 |
| 8160670 | -3.15925 | 8.405114 | -42.6487 | 1.39E-17 | 5.53E-14 | 29.93119 | chr9  |

|         |          |          |          |          |          |          |       |
|---------|----------|----------|----------|----------|----------|----------|-------|
| 7929047 | -3.21704 | 8.170397 | -39.3328 | 4.86E-17 | 1.16E-13 | 28.87429 | chr10 |
| 7967117 | -3.21774 | 8.850352 | -32.6739 | 8.51E-16 | 9.96E-13 | 26.33913 | chr12 |
| 8092169 | -3.39179 | 9.191239 | -16.3651 | 3.04E-11 | 3.95E-09 | 16.12904 | chr3  |
| 8067140 | -3.42837 | 6.929765 | -34.0924 | 4.42E-16 | 6.77E-13 | 26.93234 | chr20 |
| 7929052 | -3.45905 | 8.599761 | -24.7204 | 6.12E-14 | 3.05E-11 | 22.3097  | chr10 |
| 7961142 | -3.5366  | 7.198477 | -24.7168 | 6.14E-14 | 3.05E-11 | 22.30758 | chr12 |
| 8040080 | -3.7313  | 8.497498 | -39.8043 | 4.05E-17 | 1.15E-13 | 29.03194 | chr2  |
| 7958913 | -3.75251 | 9.967077 | -32.2764 | 1.03E-15 | 1.14E-12 | 26.1671  | chr12 |
| 8101126 | -3.87547 | 8.61477  | -19.4734 | 2.27E-12 | 5.07E-10 | 18.7469  | chr4  |
| 7929065 | -4.93779 | 9.643548 | -25.1385 | 4.74E-14 | 2.55E-11 | 22.55726 | chr10 |



| start    | end      | strand | geneID   | genename  | geneDescr                            | mRNAid   |
|----------|----------|--------|----------|-----------|--------------------------------------|----------|
| 23194040 | 23228200 | +      | NM_00103 | SCNN1G    | sodium channel, nonvoltage-gate      | NM_00103 |
| 15133970 | 15268754 | +      | NM_00103 | INSC      | inscuteable homolog (Drosophila      | NM_00103 |
| 1.18E+08 | 1.18E+08 | +      | NM_00101 | PNLIPRP3  | pancreatic lipase-related protein    | NM_00101 |
| 39917029 | 40177356 | -      | NM_00578 | LHFP      | lipoma HMGIC fusion partner          | NM_00578 |
| 1.55E+08 | 1.55E+08 | -      | NM_00128 | CLIC2     | chloride intracellular channel 2     | NM_00128 |
| 95078714 | 95090397 | +      | NM_00108 | SERPINA3  | serpin peptidase inhibitor, clade    | NM_00108 |
| 0        | 0        | ---    | ---      | NA        | NA                                   | NM_05403 |
| 8429011  | 8439257  | +      | NM_13931 | ANGPTL4   | angiopoietin-like 4                  | NM_13931 |
| 39738531 | 39743173 | -      | NM_00052 | KRT14     | keratin 14                           | NM_00052 |
| 1.01E+08 | 1.01E+08 | +      | NM_00060 | SERPINE1  | serpin peptidase inhibitor, clade    | NM_00060 |
| 14303634 | 14318270 | -      | NM_19839 | FLRT3     | fibronectin leucine rich transmen    | NM_19839 |
| 33172392 | 33624576 | +      | NM_20694 | LTBP1     | latent transforming growth factor    | NM_20694 |
| 1.17E+08 | 1.17E+08 | +      | NM_00100 | TAGLN     | transgelin                           | NM_00100 |
| 91539035 | 91576806 | -      | NM_00192 | DCN       | decorin                              | NM_00192 |
| 1.49E+08 | 1.49E+08 | +      | NM_00011 | SLC26A2   | solute carrier family 26 (sulfate tr | NM_00011 |
| 1.34E+08 | 1.34E+08 | -      | NM_00113 | NDRG1     | N-myc downstream regulated 1         | NM_00113 |
| 2.3E+08  | 2.31E+08 | -      | NM_13907 | DNER      | delta/notch-like EGF repeat conta    | NM_13907 |
| 82068863 | 82132137 | +      | NM_00215 | HSD17B2   | hydroxysteroid (17-beta) dehydr      | NM_00215 |
| 1290619  | 1309826  | -      | NM_08048 | SDCBP2    | syndecan binding protein (synten     | NM_08048 |
| 2.16E+08 | 2.16E+08 | -      | NM_21248 | FN1       | fibronectin 1                        | NM_21248 |
| 2.42E+08 | 2.43E+08 | -      | NM_15266 | PLD5      | phospholipase D family, member       | NM_15266 |
| 8819340  | 8824583  | +      | NM_00216 | ID2       | inhibitor of DNA binding 2, domi     | NM_00216 |
| 1.53E+08 | 1.53E+08 | +      | NM_00312 | SPRR1B    | small proline-rich protein 1B (cor   | NM_00312 |
| 37006495 | 37017008 | +      | NM_00391 | CCNA1     | cyclin A1                            | NM_00391 |
| 1.49E+08 | 1.49E+08 | +      | NM_01494 | ABLIM3    | actin binding LIM protein family,    | NM_01494 |
| 2.01E+08 | 2.02E+08 | +      | NM_00115 | AOX1      | aldehyde oxidase 1                   | NM_00115 |
| 1.22E+08 | 1.22E+08 | -      | NM_01455 | TFCP2L1   | transcription factor CP2-like 1      | NM_01455 |
| 1.55E+08 | 1.55E+08 | +      | NM_00728 | MME       | membrane metallo-endopeptidas        | NM_00728 |
| 61554939 | 61571122 | +      | NM_00114 | SERPINB2  | serpin peptidase inhibitor, clade    | NM_00114 |
| 83140664 | 83182901 | -      | NR_02681 | LOC80154  | hypothetical LOC80154                | NR_02681 |
| 31477305 | 31500610 | +      | NM_13426 | SMTN      | smoothelin                           | NM_13426 |
| 1.08E+08 | 1.08E+08 | -      | NM_00103 | NRCAM     | neuronal cell adhesion molecule      | NM_00103 |
| 49830236 | 49833991 | -      | NM_00306 | SNAI2     | snail homolog 2 (Drosophila)         | NM_00306 |
| 7942358  | 7952616  | +      | NM_00114 | ALOX15B   | arachidonate 15-lipoxygenase, ty     | NM_00114 |
| 1.63E+08 | 1.63E+08 | -      | NM_00446 | FAP       | fibroblast activation protein, alp   | NM_00446 |
| 43803498 | 43805185 | +      | NM_00263 | PI3       | peptidase inhibitor 3, skin-deri     | NM_00263 |
| 1.72E+08 | 1.72E+08 | -      | NM_00441 | DUSP1     | dual specificity phosphatase 1       | NM_00441 |
| 29653757 | 29937692 | -      | NM_17586 | TMTC1     | transmembrane and tetratricope       | NM_17586 |
| 1.19E+08 | 1.19E+08 | +      | NR_00313 | CEP170L   | centrosomal protein 170kDa-like      | NR_00313 |
| 2.01E+08 | 2.01E+08 | +      | NM_20345 | CAMSAP1L1 | calmodulin regulated spectrin-as     | NM_20345 |
| 82167585 | 82192753 | +      | NM_03233 | C10orf58  | chromosome 10 open reading fra       | NM_03233 |
| 29598445 | 29653154 | +      | NM_01783 | RNF125    | ring finger protein 125              | NM_01783 |
| 1.05E+08 | 1.05E+08 | -      | NM_00103 | ALDH1L2   | aldehyde dehydrogenase 1 family,     | NM_00103 |
| 52840435 | 52845910 | -      | NM_00555 | KRT6B     | keratin 6B                           | NM_00555 |
| 29920609 | 29940659 | -      | NM_01612 | TMEM66    | transmembrane protein 66             | NM_01612 |
| 1.11E+08 | 1.11E+08 | -      | NM_00543 | MALL      | mal, T-cell differentiation protein  | NM_00543 |
| 8043790  | 8055702  | -      | NM_00261 | PER1      | period homolog 1 (Drosophila)        | NM_00261 |
| 57101144 | 57364600 | -      | NM_13345 | CCBE1     | collagen and calcium binding EGF     | NM_13345 |
| 78225197 | 78606790 | +      | NM_01490 | NAV3      | neuron navigator 3                   | NM_01490 |
| 2.43E+08 | 2.43E+08 | -      | NM_01481 | CEP170    | centrosomal protein 170kDa           | NM_01481 |
| 52880958 | 52887022 | -      | NM_00555 | KRT6A     | keratin 6A                           | NM_00555 |

|          |          |   |          |          |                                                |          |
|----------|----------|---|----------|----------|------------------------------------------------|----------|
| 19007427 | 19140755 | - | NM_00107 | GPR64    | G protein-coupled receptor 64                  | NM_00107 |
| 67511604 | 67597649 | + | NM_18152 | PIK3R1   | phosphoinositide-3-kinase, regulator           | NM_18152 |
| 16023181 | 16045676 | - | NM_02118 | CYP4F11  | cytochrome P450, family 4, subfamily           | NM_02118 |
| 43407818 | 43663560 | - | NM_01807 | ANO10    | anoctamin 10                                   | NM_01807 |
| 2.22E+08 | 2.22E+08 | - | NM_00720 | DUSP10   | dual specificity phosphatase 10                | NM_00720 |
| 95066850 | 95132071 | + | NM_01489 | RHOBTB3  | Rho-related BTB domain containing              | NM_01489 |
| 28966271 | 28972120 | + | NM_01234 | BAMBI    | BMP and activin membrane-bound                 | NM_01234 |
| 2.38E+08 | 2.38E+08 | + | NM_19818 | COPS8    | COP9 constitutive photomorphogen               | NM_19818 |
| 39628664 | 39673748 | + | NM_00224 | KCNJ15   | potassium inwardly-rectifying chan             | NM_00224 |
| 95672089 | 95953683 | - | NM_00584 | ABCC4    | ATP-binding cassette, sub-family C             | NM_00584 |
| 90098631 | 90230077 | + | NM_03227 | LRRC8C   | leucine rich repeat containing 8 fa            | NM_03227 |
| 50270180 | 50310369 | + | NM_01420 | AP2A1    | adaptor-related protein complex                | NM_01420 |
| 1.04E+08 | 1.04E+08 | - | NM_00181 | CENPE    | centromere protein E, 312kDa                   | NM_00181 |
| 13789062 | 13956831 | - | NM_00100 | GPM6B    | glycoprotein M6B                               | NM_00100 |
| 86159809 | 86205498 | + | NM_00252 | NT5E     | 5'-nucleotidase, ecto (CD73)                   | NM_00252 |
| 676389   | 683392   | + | NM_00586 | FSTL3    | follicle-stimulating-like 3 (secreted glycopro | NM_00586 |
| 1.24E+08 | 1.24E+08 | + | NM_02162 | PLEKHA1  | pleckstrin homology domain containi            | NM_02162 |
| 24718320 | 24732416 | - | NM_00035 | TGM1     | transglutaminase 1 (K polypeptidi              | NM_00035 |
| 50663414 | 50747588 | - | NM_00012 | ERCC6    | excision repair cross-complement               | NM_00012 |
| 17270470 | 17279592 | + | NM_00338 | VIM      | vimentin                                       | NM_00338 |
| 1.93E+08 | 1.93E+08 | + | NM_00292 | RGS2     | regulator of G-protein signaling 2,            | NM_00292 |
| 89513647 | 89629686 | + | NM_01460 | HERC3    | hect domain and RLD 3                          | NM_01460 |
| 38008592 | 38080696 | - | NM_00630 | SRPX     | sushi-repeat-containing protein, )             | NM_00630 |
| 31205316 | 31230667 | - | NM_00676 | LAPTM5   | lysosomal protein transmembran                 | NM_00676 |
| 1.29E+08 | 1.3E+08  | + | NM_17585 | CHSY3    | chondroitin sulfate synthase 3                 | NM_17585 |
| 1.02E+08 | 1.02E+08 | + | NM_01450 | UTP20    | UTP20, small subunit (SSU) proce               | NM_01450 |
| 1.5E+08  | 1.5E+08  | - | NM_13916 | RAET1E   | retinoic acid early transcript 1E              | NM_13916 |
| 1.5E+08  | 1.5E+08  | - | NM_00469 | LATS1    | LATS, large tumor suppressor, hor              | NM_00469 |
| 39873280 | 39889668 | + | NM_00324 | THBS1    | thrombospondin 1                               | NM_00324 |
| 99393398 | 99579727 | - | NM_00572 | TSPAN5   | tetraspanin 5                                  | NM_00572 |
| 24463028 | 24466242 | + | NM_00101 | PCOTH    | prostate collagen triple helix                 | NM_00101 |
| 1.2E+08  | 1.2E+08  | - | NM_00107 | CUL4B    | cullin 4B                                      | NM_00107 |
| 2.21E+08 | 2.21E+08 | + | NM_01865 | MARK1    | MAP/microtubule affinity-regulat               | NM_01865 |
| 7293046  | 7297889  | - | NM_02036 | PLSCR3   | phospholipid scramblase 3                      | NM_02036 |
| 83517735 | 83621473 | - | NM_19933 | HOMER2   | homer homolog 2 (Drosophila)                   | NM_19933 |
| 54683454 | 54898583 | + | NM_00312 | SPTBN1   | spectrin, beta, non-erythrocytic 1             | NM_00312 |
| 6322305  | 6474326  | - | NM_02041 | PPP2R2C  | protein phosphatase 2, regulator               | NM_02041 |
| 1.21E+08 | 1.21E+08 | + | NM_00288 | RALB     | v-ral simian leukemia viral oncoge             | NM_00288 |
| 1.14E+08 | 1.14E+08 | + | NM_00600 | ZBTB16   | zinc finger and BTB domain containi            | NM_00600 |
| 68522088 | 68609384 | - | NM_00187 | CPT1A    | carnitine palmitoyltransferase 1A              | NM_00187 |
| 14204450 | 14252719 | + | NM_00604 | HS3ST3B1 | heparan sulfate (glucosamine) 3-C              | NM_00604 |
| 79074146 | 79122332 | + | NM_00149 | GCNT1    | glucosaminyl (N-acetyl) transferas             | NM_00149 |
| 1.39E+08 | 1.39E+08 | - | NM_02274 | HIPK2    | homeodomain interacting protei                 | NM_02274 |
| 6055492  | 6104191  | - | NM_01767 | FERMT1   | fermitin family homolog 1 (Droso               | NM_01767 |
| 1.09E+08 | 1.09E+08 | + | NM_03222 | TMEM164  | transmembrane protein 164                      | NM_03222 |
| 1.28E+08 | 1.28E+08 | + | NM_00121 | CALU     | calumenin                                      | NM_00121 |
| 30052821 | 30066300 | - | NM_01794 | FKBP14   | FK506 binding protein 14, 22 kDa               | NM_01794 |
| 54094757 | 54209714 | - | NM_01784 | FAM120C  | family with sequence similarity 1              | NM_01784 |
| 2.04E+08 | 2.04E+08 | - | NM_19844 | GOLT1A   | golgi transport 1 homolog A (S. ce             | NM_19844 |
| 1.6E+08  | 1.6E+08  | - | NM_02456 | CCNJL    | cyclin J-like                                  | NM_02456 |
| 32808494 | 32812712 | - | NM_00415 | PSMB8    | proteasome (prosome, macropair                 | NM_00415 |
| 1.58E+08 | 1.58E+08 | + | NM_00082 | GLRB     | glycine receptor, beta                         | NM_00082 |

|          |          |   |          |          |                                      |          |
|----------|----------|---|----------|----------|--------------------------------------|----------|
| 1.12E+08 | 1.12E+08 | - | NM_02490 | DENND2D  | DENN/MADD domain containing          | NM_02490 |
| 24577425 | 24585074 | + | NM_01960 | SUSD2    | sushi domain containing 2            | NM_01960 |
| 75670882 | 75677255 | + | NM_00265 | PLAU     | plasminogen activator, urokinase     | NM_00265 |
| 15005522 | 15071774 | + | NM_18248 | CPEB2    | cytoplasmic polyadenylation element  | NM_18248 |
| 1.41E+08 | 1.41E+08 | + | NM_01893 | PCDHB14  | protocadherin beta 14                | NM_01893 |
| 69556048 | 69597937 | - | NM_02180 | DNAJC12  | DnaJ (Hsp40) homolog, subfamily      | NM_02180 |
| 1.72E+08 | 1.73E+08 | + | NM_15360 | C5orf41  | chromosome 5 open reading frame      | NM_15360 |
| 39916569 | 39918691 | + | NM_00167 | ATF4     | activating transcription factor 4 (  | NM_00167 |
| 1.24E+08 | 1.24E+08 | + | NM_00200 | FGF2     | fibroblast growth factor 2 (basic)   | NM_00200 |
| 27805893 | 27845963 | + | NM_03243 | ZNF512   | zinc finger protein 512              | NM_03243 |
| 1.83E+08 | 1.83E+08 | - | NM_01503 | NMNAT2   | nicotinamide nucleotide adenyl       | NM_01503 |
| 74976482 | 75062873 | - | NM_00404 | ARRB1    | arrestin, beta 1                     | NM_00404 |
| 2.07E+08 | 2.07E+08 | + | NM_01400 | IKBKE    | inhibitor of kappa light polypepti   | NM_01400 |
| 38599676 | 38613982 | + | NM_00155 | IGFBP4   | insulin-like growth factor binding   | NM_00155 |
| 19422057 | 19510432 | + | NM_00110 | TMC5     | transmembrane channel-like 5         | NM_00110 |
| 1.57E+08 | 1.57E+08 | + | NM_00109 | NIPAL4   | NIPA-like domain containing 4        | NM_00109 |
| 61583749 | 61634825 | + | NM_00426 | FADS2    | fatty acid desaturase 2              | NM_00426 |
| 57918627 | 57918698 | + | NR_02949 | MIR21    | microRNA 21                          | NR_02949 |
| 66129992 | 66139645 | - | NM_00153 | SLC29A2  | solute carrier family 29 (nucleosic  | NM_00153 |
| 16771938 | 16799831 | + | NM_02407 | TMEM38A  | transmembrane protein 38A            | NM_02407 |
| 39105357 | 39219675 | - | NM_00146 | FYB      | FYN binding protein                  | NM_00146 |
| 1.45E+08 | 1.45E+08 | + | NM_00647 | TXNIP    | thioredoxin interacting protein      | NM_00647 |
| 45143948 | 45144081 | - | NR_00291 | SNORA5A  | small nucleolar RNA, H/ACA box 5     | NR_00291 |
| 39669997 | 39678665 | - | NM_00227 | KRT15    | keratin 15                           | NM_00227 |
| 31142754 | 31147151 | - | NM_00277 | PRSS8    | protease, serine, 8                  | NM_00277 |
| 11866268 | 11903201 | + | NM_00128 | CLCN6    | chloride channel 6                   | NM_00128 |
| 43791946 | 43816955 | - | NM_02402 | TMPRSS3  | transmembrane protease, serine       | NM_02402 |
| 6980503  | 7006038  | - | NM_20731 | CMPK2    | cytidine monophosphate (UMP-C        | NM_20731 |
| 26365398 | 26378548 | + | NM_00704 | BTN3A2   | butyrophilin, subfamily 3, memb      | NM_00704 |
| 1.52E+08 | 1.52E+08 | - | NM_00468 | NMI      | N-myc (and STAT) interactor          | NM_00468 |
| 33462745 | 33515765 | + | NM_01867 | ACSS2    | acyl-CoA synthetase short-chain f    | NM_01867 |
| 76967335 | 76976061 | - | NM_00556 | LGALS3BP | lectin, galactoside-binding, solub   | NM_00556 |
| 88326724 | 88355282 | - | NM_01661 | KRCC1    | lysine-rich coiled-coil 1            | NM_01661 |
| 1.32E+08 | 1.32E+08 | - | NM_00075 | CRAT     | carnitine O-acetyltransferase        | NM_00075 |
| 50474422 | 50528581 | + | NM_00364 | SLC27A2  | solute carrier family 27 (fatty acid | NM_00364 |
| 1.38E+08 | 1.38E+08 | - | NM_00041 | IFNGR1   | interferon gamma receptor 1          | NM_00041 |
| 67777790 | 67796743 | + | NM_00069 | ALDH3B1  | aldehyde dehydrogenase 3 family,     | NM_00069 |
| 96671197 | 96710789 | + | NM_00062 | BDKRB2   | bradykinin receptor B2               | NM_00062 |
| 1.16E+08 | 1.16E+08 | + | NM_00723 | SLC6A14  | solute carrier family 6 (amino acid  | NM_00723 |
| 57319129 | 57335757 | - | NM_00422 | UBE2L6   | ubiquitin-conjugating enzyme E2      | NM_00422 |
| 1.2E+08  | 1.2E+08  | + | NM_18324 | TMEM37   | transmembrane protein 37             | NM_18324 |
| 1.42E+08 | 1.42E+08 | - | NM_00080 | FGF1     | fibroblast growth factor 1 (acidic)  | NM_00080 |
| 6561250  | 6575615  | + | NM_01800 | TAPBPL   | TAP binding protein-like             | NM_01800 |
| 13357737 | 13461809 | - | NM_02492 | NUP210   | nucleoporin 210kDa                   | NM_02492 |
| 42733950 | 42780869 | + | NM_00246 | MX2      | myxovirus (influenza virus) resista  | NM_00246 |
| 937540   | 994285   | - | NM_00686 | ADAP1    | ArfGAP with dual PH domains 1        | NM_00686 |
| 15260717 | 15374304 | - | NM_03291 | RERG     | RAS-like, estrogen-regulated, grov   | NM_03291 |
| 31802645 | 31807541 | + | NM_00104 | C6orf48  | chromosome 6 open reading frame      | NM_00104 |
| 1.92E+08 | 1.92E+08 | - | NM_00731 | STAT1    | signal transducer and activator of   | NM_00731 |
| 26402481 | 26415466 | + | NM_00114 | BTN3A1   | butyrophilin, subfamily 3, memb      | NM_00114 |
| 65405870 | 65409531 | - | NM_00208 | GPX2     | glutathione peroxidase 2 (gastroir   | NM_00208 |
| 95657864 | 95786202 | - | NM_02473 | CLMN     | calmin (calponin-like, transmembr    | NM_02473 |

|          |          |   |          |          |                                                                     |          |
|----------|----------|---|----------|----------|---------------------------------------------------------------------|----------|
| 97187339 | 97280349 | + | NM_02119 | PTBP2    | polypyrimidine tract binding protein                                | NM_02119 |
| 2.31E+08 | 2.31E+08 | - | NM_08042 | SP110    | SP110 nuclear body protein                                          | NM_08042 |
| 1.58E+08 | 1.58E+08 | - | NM_02016 | LXN      | latexin                                                             | NM_02016 |
| 62688439 | 62703700 | + | NM_19872 | TCEA2    | transcription elongation factor A                                   | NM_19872 |
| 40610862 | 40674597 | + | NM_00113 | ATP6V0A1 | ATPase, H+ transporting, lysosomal                                  | NM_00113 |
| 10381764 | 10397291 | + | NM_00020 | ICAM1    | intercellular adhesion molecule 1                                   | NM_00020 |
| 26726049 | 26733228 | - | NM_08066 | SLC46A1  | solute carrier family 46 (folate transporter)                       | NM_08066 |
| 29910330 | 29913550 | + | NM_00211 | HLA-A    | major histocompatibility complex class I A chain                    | NM_00211 |
| 1.4E+08  | 1.4E+08  | - | NM_00607 | CITED2   | Cbp/p300-interacting transcription factor 2                         | NM_00607 |
| 63661059 | 63856703 | + | NM_03219 | ARID5B   | AT rich interactive domain 5B (MFR1)                                | NM_03219 |
| 7760441  | 7941586  | - | NM_19859 | AFAP1    | actin filament associated protein 1                                 | NM_19859 |
| 7247150  | 7261793  | - | NM_01654 | C1RL     | complement component 1, r subcomponent                              | NM_01654 |
| 11453452 | 11462545 | - | NM_19853 | TMEM205  | transmembrane protein 205                                           | NM_19853 |
| 6939702  | 6943281  | + | NM_20156 | SLC16A13 | solute carrier family 16, member 13                                 | NM_20156 |
| 1.69E+08 | 1.69E+08 | - | NM_00101 | DDX60L   | DEAD (Asp-Glu-Ala-Asp) box polypeptide 60L                          | NM_00101 |
| 57567234 | 57571537 | + | NM_02112 | PMAIP1   | phorbol-12-myristate-13-acetate-induced protein 1                   | NM_02112 |
| 1.55E+08 | 1.55E+08 | + | NM_00442 | EFNA1    | ephrin-A1                                                           | NM_00442 |
| 91174343 | 91180758 | + | NM_01242 | IFIT5    | interferon-induced protein with tetratricopeptide repeats 5         | NM_01242 |
| 27139973 | 27142394 | - | NM_00673 | HOXA2    | homeobox A2                                                         | NM_00673 |
| 62461569 | 62464759 | + | NM_00108 | C17orf60 | chromosome 17 open reading frame 60                                 | NM_00108 |
| 75011883 | 75017877 | - | NM_00049 | CYP1A1   | cytochrome P450, family 1, subfamily 1A, polypeptide 1              | NM_00049 |
| 15588479 | 15600693 | + | NM_14477 | RBM11    | RNA binding motif protein 11                                        | NM_14477 |
| 42032751 | 42065194 | - | NM_00093 | PLAT     | plasminogen activator, tissue                                       | NM_00093 |
| 71211226 | 71267425 | + | NM_01233 | TSPAN15  | tetraspanin 15                                                      | NM_01233 |
| 88718385 | 88723017 | + | NM_00308 | SNCG     | synuclein, gamma (breast cancer-associated 1)                       | NM_00308 |
| 90895542 | 90909309 | + | NM_00100 | ZNF774   | zinc finger protein 774                                             | NM_00100 |
| 1.51E+08 | 1.51E+08 | - | NM_00144 | FAT2     | FAT tumor suppressor homolog 2                                      | NM_00144 |
| 26440763 | 26453650 | + | NM_00699 | BTN3A3   | butyrophilin, subfamily 3, member 3                                 | NM_00699 |
| 39436673 | 39451977 | + | NM_14529 | APOBEC3F | apolipoprotein B mRNA editing enzyme, cytosine deaminase 3F         | NM_14529 |
| 3728374  | 3750810  | + | NM_01442 | TJP3     | tight junction protein 3 (zona occludens 3)                         | NM_01442 |
| 18632758 | 18660164 | + | NM_01741 | USP18    | ubiquitin specific peptidase 18                                     | NM_01741 |
| 1.1E+08  | 1.1E+08  | - | NM_00295 | SORT1    | sortilin 1                                                          | NM_00295 |
| 36606689 | 36688436 | + | NM_00417 | SLC1A3   | solute carrier family 1 (glial high affinity glutamate transporter) | NM_00417 |
| 1.17E+08 | 1.17E+08 | + | NM_00226 | KPNA5    | karyopherin alpha 5 (importin alpha 5)                              | NM_00226 |
| 94929162 | 94938296 | + | NM_00116 | PDP1     | pyruvate dehydrogenase phosphatase 1                                | NM_00116 |
| 6585850  | 6591163  | - | NM_00125 | CD70     | CD70 molecule                                                       | NM_00125 |
| 44319619 | 44343448 | + | NM_02522 | PNPLA3   | patatin-like phospholipase domain containing 3                      | NM_02522 |
| 43747548 | 43751248 | - | NM_18251 | C1orf210 | chromosome 1 open reading frame 210                                 | NM_18251 |
| 65270115 | 65270288 | - | BC018448 | MALAT1   | metastasis associated lung adenocarcinoma transcript 1              | BC018448 |
| 74735109 | 74749385 | + | NM_00151 | CXCL1    | chemokine (C-X-C motif) ligand 1                                    | NM_00151 |
| 7446     | 7517     | - | AF284753 | UIMC1    | ubiquitin interaction motif containing 1                            | AF284753 |
| 17393256 | 17445930 | - | NM_00736 | PADI2    | peptidyl arginine deiminase, type II                                | NM_00736 |
| 24171567 | 24194784 | - | NM_00014 | FUCA1    | fucosidase, alpha-L-1, tissue                                       | NM_00014 |
| 77385245 | 77395179 | - | NM_01597 | TAF9B    | TAF9B RNA polymerase II, TATA box binding protein associated factor | NM_01597 |
| 56735381 | 56753909 | - | NM_00541 | STAT2    | signal transducer and activator of transcription 2                  | NM_00541 |
| 1.51E+08 | 1.51E+08 | - | NM_00496 | GABRE    | gamma-aminobutyric acid (GABA) receptor-associated protein 1        | NM_00496 |
| 42853050 | 42983478 | - | NM_15302 | PRICKLE1 | prickle homolog 1 (Drosophila)                                      | NM_15302 |
| 58223309 | 58280461 | + | NM_02067 | ABHD6    | abhydrolase domain containing 6                                     | NM_02067 |
| 24025231 | 24028787 | + | NM_02432 | THTPA    | thiamine triphosphatase                                             | NM_02432 |
| 20353163 | 20370848 | - | NM_00104 | LGALS9B  | lectin, galactoside-binding, soluble 9B                             | NM_00104 |
| 80371854 | 80548667 | - | NM_00637 | SEMA3C   | sema domain, immunoglobulin domain containing 3C                    | NM_00637 |
| 1.11E+08 | 1.11E+08 | - | NM_00477 | C5orf13  | chromosome 5 open reading frame 13                                  | NM_00477 |

|          |          |   |           |           |                                                           |           |
|----------|----------|---|-----------|-----------|-----------------------------------------------------------|-----------|
| 2198637  | 2204640  | + | NM_01435  | RAB26     | RAB26, member RAS oncogene family                         | NM_01435  |
| 50069801 | 50103123 | + | NM_00104  | PHF11     | PHD finger protein 11                                     | NM_00104  |
| 49209056 | 49213919 | + | NM_17354  | KLHDC8B   | kelch domain containing 8B                                | NM_17354  |
| 1.46E+08 | 1.46E+08 | - | NM_02110  | PLSCR1    | phospholipid scramblase 1                                 | NM_02110  |
| 92728831 | 92747336 | - | NM_01765  | SAMD9     | sterile alpha motif domain containing 9                   | NM_01765  |
| 3000033  | 3050304  | + | NM_00332  | TULP3     | tubby like protein 3                                      | NM_00332  |
| 1.83E+08 | 1.83E+08 | - | NM_01439  | LAMP3     | lysosomal-associated membrane protein 3                   | NM_01439  |
| 72452148 | 72490126 | - | NM_00101  | GRAMD2    | GRAM domain containing 2                                  | NM_00101  |
| 89518001 | 89531043 | - | NM_00205  | GBP1      | guanylate binding protein 1, interferon gamma-inducible   | NM_00205  |
| 1.25E+08 | 1.25E+08 | + | NM_00096  | PTGS1     | prostaglandin-endoperoxide synthase 1                     | NM_00096  |
| 35520347 | 35580176 | - | NM_01547  | SAMHD1    | SAM domain and HD domain 1                                | NM_01547  |
| 1.05E+08 | 1.05E+08 | + | AK131040  | LOC388022 | hypothetical gene supported by A                          | AK131040  |
| 1.07E+08 | 1.07E+08 | + | NM_15277  | TCP11L2   | t-complex 11 (mouse)-like 2                               | NM_15277  |
| 46967117 | 47010082 | - | NM_15384  | GPR110    | G protein-coupled receptor 110                            | NM_15384  |
| 57290004 | 57318576 | - | NM_01599  | PLLP      | plasma membrane proteolipid (pl)                          | NM_01599  |
| 38201114 | 38203443 | + | NM_00531  | H1FO      | H1 histone family, member 0                               | NM_00531  |
| 47314752 | 47621691 | - | NM_02274  | TNS3      | tensin 3                                                  | NM_02274  |
| 2.39E+08 | 2.39E+08 | + | NM_00113  | LRRFIP1   | leucine rich repeat (in FLII) interacting protein 1       | NM_00113  |
| 22765503 | 22771620 | + | NM_00060  | IL6       | interleukin 6 (interferon, beta 2)                        | NM_00060  |
| 70346143 | 70499083 | + | NM_00103  | SMOC1     | SPARC related modular calcium binding protein 1           | NM_00103  |
| 61304493 | 61311502 | - | NM_00297  | SERPINB4  | serpin peptidase inhibitor, clade B member 4              | NM_00297  |
| 93454963 | 93455032 | + | NR_002566 | SCARNA9   | small Cajal body-specific RNA 9                           | NR_002566 |
| 1.13E+08 | 1.13E+08 | + | NM_00618  | OAS3      | 2'-5'-oligoadenylate synthetase 3, nuclear                | NM_00618  |
| 7187513  | 7245043  | - | NM_00173  | C1R       | complement component 1, r subcomponent                    | NM_00173  |
| 29691237 | 29694289 | + | NM_01895  | HLA-F     | major histocompatibility complex class I E                | NM_01895  |
| 1.37E+08 | 1.37E+08 | - | NM_05296  | IL22RA2   | interleukin 22 receptor, alpha 2                          | NM_05296  |
| 1.52E+08 | 1.52E+08 | + | NM_02012  | TUFT1     | tuftelin 1                                                | NM_02012  |
| 1.42E+08 | 1.43E+08 | + | NM_01507  | ARHGAP26  | Rho GTPase activating protein 26                          | NM_01507  |
| 18885330 | 18939294 | + | NM_00133  | CXADR     | coxsackievirus and adenovirus receptor                    | NM_00133  |
| 94492724 | 94515276 | + | NM_02311  | OTUB2     | OTU domain, ubiquitin aldehyde hydrolase 2                | NM_02311  |
| 61254600 | 61266433 | + | NM_01239  | SERPINB13 | serpin peptidase inhibitor, clade B member 13             | NM_01239  |
| 35606783 | 35615228 | + | NM_02191  | FXD3      | FXD domain containing ion transporters                    | NM_02191  |
| 1.31E+08 | 1.31E+08 | - | NM_00101  | PODXL     | podocalyxin-like                                          | NM_00101  |
| 17513755 | 17516457 | - | NM_00433  | BST2      | bone marrow stromal cell antigen 2                        | NM_00433  |
| 37779996 | 37780913 | + | NM_18179  | GPR141    | G protein-coupled receptor 141                            | NM_18179  |
| 1.34E+08 | 1.34E+08 | - | NM_14517  | SLC2A12   | solute carrier family 2 (facilitated glucose transporter) | NM_14517  |
| 1.55E+08 | 1.55E+08 | + | NM_00554  | INSIG1    | insulin induced gene 1                                    | NM_00554  |
| 1.36E+08 | 1.37E+08 | - | NM_00459  | SPOCK1    | sparc/osteonectin, cwcv and kazin-like domain containing  | NM_00459  |
| 57749809 | 57756087 | - | NM_00662  | PLK2      | polo-like kinase 2 (Drosophila)                           | NM_00662  |
| 1.24E+08 | 1.24E+08 | + | NM_00732  | DMBT1     | deleted in malignant brain tumor 1                        | NM_00732  |
| 5710919  | 5732093  | + | NM_00607  | TRIM22    | tripartite motif-containing 22                            | NM_00607  |
| 1.22E+08 | 1.22E+08 | - | NM_01903  | RHOF      | ras homolog gene family, member 1                         | NM_01903  |
| 1.1E+08  | 1.1E+08  | + | NM_00075  | CSF1      | colony stimulating factor 1 (macrophage)                  | NM_00075  |
| 6531020  | 6535933  | + | NM_00381  | TNFSF9    | tumor necrosis factor (ligand) superfamily 9              | NM_00381  |
| 89299891 | 89364249 | + | NM_01791  | HERC6     | hect domain and RLD 6                                     | NM_01791  |
| 9992     | 10059    | + | L23320    | RFC1      | replication factor C (activator 1) 1                      | L23320    |
| 32821935 | 32827628 | + | NM_00280  | PSMB9     | proteasome (prosome, macropain) subunit type 9            | NM_00280  |
| 1.4E+08  | 1.4E+08  | - | NM_00059  | CD14      | CD14 molecule                                             | NM_00059  |
| 1.5E+08  | 1.5E+08  | - | NM_00354  | HIST2H4A  | histone cluster 2, H4a                                    | NM_00354  |
| 30116131 | 30124878 | - | NM_02430  | GDPD3     | glycerophosphodiester phosphodiesterase 3                 | NM_02430  |
| 1.9E+08  | 1.9E+08  | - | NM_02110  | CLDN1     | claudin 1                                                 | NM_02110  |
| 27180996 | 27183287 | - | NM_01910  | HOXA5     | homeobox A5                                               | NM_01910  |

|          |          |   |          |          |                                     |          |
|----------|----------|---|----------|----------|-------------------------------------|----------|
| 7168017  | 7178336  | + | NM_20144 | C1S      | complement component 1, s subc      | NM_20144 |
| 54663846 | 54676944 | - | NM_00114 | TMC4     | transmembrane channel-like 4        | NM_00114 |
| 3208063  | 3219836  | - | NM_03203 | SLC4A11  | solute carrier family 4, sodium bo  | NM_03203 |
| 94577079 | 94583033 | + | NM_00113 | IFI27    | interferon, alpha-inducible protei  | NM_00113 |
| 64879356 | 64883828 | + | NM_00327 | TM7SF2   | transmembrane 7 superfamily me      | NM_00327 |
| 1.11E+08 | 1.11E+08 | - | NM_00469 | SLC16A4  | solute carrier family 16, member    | NM_00469 |
| 1.32E+08 | 1.32E+08 | - | NM_00219 | IRF1     | interferon regulatory factor 1      | NM_00219 |
| 47489240 | 47516423 | + | NM_17803 | CYP4X1   | cytochrome P450, family 4, subfa    | NM_17803 |
| 66429144 | 66551435 | - | NM_01554 | LRIG1    | leucine-rich repeats and immuno     | NM_01554 |
| 1.14E+08 | 1.14E+08 | + | NM_01623 | ACSL5    | acyl-CoA synthetase long-chain fa   | NM_01623 |
| 1.63E+08 | 1.63E+08 | - | NM_02216 | IFIH1    | interferon induced with helicase    | NM_02216 |
| 27454434 | 27472371 | - | NM_00183 | CLU      | clusterin                           | NM_00183 |
| 76011751 | 76031595 | + | NM_00199 | F2R      | coagulation factor II (thrombin) r  | NM_00199 |
| 49842638 | 49851423 | - | NM_00333 | UBA7     | ubiquitin-like modifier activating  | NM_00333 |
| 1.8E+08  | 1.8E+08  | - | NM_00511 | GFPT2    | glutamine-fructose-6-phosphate t    | NM_00511 |
| 17575593 | 17610728 | + | NM_01623 | PADI3    | peptidyl arginine deiminase, type   | NM_01623 |
| 57653958 | 57698944 | + | NM_20152 | GPR56    | G protein-coupled receptor 56       | NM_20152 |
| 24630422 | 24636611 | + | NM_00608 | IRF9     | interferon regulatory factor 9      | NM_00608 |
| 1.69E+08 | 1.69E+08 | - | NM_01763 | DDX60    | DEAD (Asp-Glu-Ala-Asp) box polyp    | NM_01763 |
| 7348380  | 7361026  | + | NM_00074 | CHRNB1   | cholinergic receptor, nicotinic, b  | NM_00074 |
| 1.51E+08 | 1.51E+08 | - | NM_00394 | SELENBP1 | selenium binding protein 1          | NM_00394 |
| 36756863 | 36793700 | - | NM_00461 | TGM2     | transglutaminase 2 (C polypeptid    | NM_00461 |
| 6658794  | 6678966  | + | NM_01752 | XAF1     | XIAP associated factor 1            | NM_01752 |
| 1.31E+08 | 1.31E+08 | + | NM_00556 | LCN2     | lipocalin 2                         | NM_00556 |
| 71392620 | 71424336 | + | NM_00174 | CALB2    | calbindin 2                         | NM_00174 |
| 61322431 | 61329127 | - | NM_00691 | SERPINB3 | serpin peptidase inhibitor, clade I | NM_00691 |
| 18496968 | 18499987 | + | NM_00486 | GDF15    | growth differentiation factor 15    | NM_00486 |
| 42410390 | 42659110 | - | NM_00609 | ATP8A1   | ATPase, aminophospholipid trans     | NM_00609 |
| 1.25E+08 | 1.25E+08 | - | NM_05822 | FBXO32   | F-box protein 32                    | NM_05822 |
| 89378268 | 89427314 | + | NM_01632 | HERC5    | hect domain and RLD 5               | NM_01632 |
| 35856991 | 35879705 | + | NM_00218 | IL7R     | interleukin 7 receptor              | NM_00218 |
| 63304280 | 63313930 | + | NM_00458 | RARRES3  | retinoic acid receptor responder    | NM_00458 |
| 41158814 | 41166473 | + | NM_00553 | IFI35    | interferon-induced protein 35       | NM_00553 |
| 70847828 | 70864567 | + | NM_00272 | SRGN     | serglycin                           | NM_00272 |
| 31430959 | 31433586 | + | NM_00667 | HCP5     | HLA complex P5                      | NM_00667 |
| 38294650 | 38303292 | - | NM_00010 | CYP1B1   | cytochrome P450, family 1, subfa    | NM_00010 |
| 31913999 | 31918422 | + | NM_00171 | CFB      | complement factor B                 | NM_00171 |
| 32455300 | 32526322 | - | NM_01431 | DDX58    | DEAD (Asp-Glu-Ala-Asp) box polyp    | NM_01431 |
| 15645441 | 15683154 | - | NM_02066 | TMEM27   | transmembrane protein 27            | NM_02066 |
| 72356367 | 72374963 | - | NM_01988 | CYP26B1  | cytochrome P450, family 26, sub     | NM_01988 |
| 1.22E+08 | 1.22E+08 | - | NM_03145 | PARP9    | poly (ADP-ribose) polymerase fam    | NM_03145 |
| 79115512 | 79129763 | + | NM_00641 | IFI44    | interferon-induced protein 44       | NM_00641 |
| 2.02E+08 | 2.02E+08 | + | NM_00111 | ELF3     | E74-like factor 3 (ets domain tran  | NM_00111 |
| 34198495 | 34207377 | - | NM_00298 | CCL5     | chemokine (C-C motif) ligand 5      | NM_00298 |
| 76954835 | 76957352 | - | NM_00540 | CXCL11   | chemokine (C-X-C motif) ligand 11   | NM_00540 |
| 1.13E+08 | 1.13E+08 | + | NM_01681 | OAS1     | 2',5'-oligoadenylate synthetase 1,  | NM_01681 |
| 79086116 | 79108484 | + | NM_00682 | IFI44L   | interferon-induced protein 44-lik   | NM_00682 |
| 92759368 | 92777680 | - | NM_15270 | SAMD9L   | sterile alpha motif domain contai   | NM_15270 |
| 313853   | 315272   | + | NM_00364 | IFITM1   | interferon induced transmembran     | NM_00364 |
| 1.3E+08  | 1.3E+08  | + | NM_01635 | CPA4     | carboxypeptidase A4                 | NM_01635 |
| 1.04E+08 | 1.04E+08 | + | NM_00629 | TNFAIP2  | tumor necrosis factor, alpha-indu   | NM_00629 |
| 33441152 | 33447609 | - | NM_00492 | AQP3     | aquaporin 3 (Gill blood group)      | NM_00492 |

|          |          |   |          |         |                                    |          |
|----------|----------|---|----------|---------|------------------------------------|----------|
| 91061712 | 91069033 | + | NM_00154 | IFIT2   | interferon-induced protein with t  | NM_00154 |
| 1.21E+08 | 1.21E+08 | - | NM_00373 | OASL    | 2'-5'-oligoadenylate synthetase-li | NM_00373 |
| 1.72E+08 | 1.72E+08 | - | NM_00381 | TNFSF10 | tumor necrosis factor (ligand) sup | NM_00381 |
| 52769988 | 52790524 | - | NM_00078 | CYP24A1 | cytochrome P450, family 24, sub    | NM_00078 |
| 91087651 | 91100728 | + | NM_00103 | IFIT3   | interferon-induced protein with t  | NM_00103 |
| 10310900 | 10324737 | - | NM_00254 | OLR1    | oxidized low density lipoprotein ( | NM_00254 |
| 7017796  | 7038370  | + | NM_08065 | RSAD2   | radical S-adenosyl methionine do   | NM_08065 |
| 1.13E+08 | 1.13E+08 | + | NM_00253 | OAS2    | 2'-5'-oligoadenylate synthetase 2, | NM_00253 |
| 76942273 | 76944650 | - | NM_00156 | CXCL10  | chemokine (C-X-C motif) ligand 10  | NM_00156 |
| 91152303 | 91163745 | + | NM_00154 | IFIT1   | interferon-induced protein with t  | NM_00154 |

9  
1853  
1709  
0  
9  
5  
1.2  
4  
6  
2  
1  
3  
1522  
0  
2  
5242  
2  
3  
9  
2  
6  
6  
5  
4  
5  
9  
3  
8  
3818  
l  
9  
7132  
8  
1  
0  
8  
7  
1  
;  
9  
3  
1  
4173  
5  
7  
4  
6  
9  
3  
2  
4



9858

3

7

5

7

9

2

9

3

5

0

3

3

1995

6

0

2

9

4

0

3

6

7

2

6

3

5

0

6

3

4442

9872

0

0

0

8

6

1

6

6

1

0

0

1

7

9

6

8

7

5

9

4

1  
1  
8  
5  
4  
0  
7  
5  
6  
4  
9  
1  
2  
2  
5248  
9287  
5  
}  
2  
4  
5  
2  
}  
5  
3  
6  
2  
5  
7  
8  
7  
7  
8  
5  
5  
6  
4  
3  
1  
3  
0  
0  
9  
3  
3  
9  
8  
0437  
5  
5009  
3  
4

0  
4  
9  
3  
0020  
1  
9  
6  
9  
9  
5  
6  
6  
6  
2967  
7  
8  
0  
5  
5423  
9  
0  
0  
9  
7  
4309  
7  
4  
8  
8  
4  
9  
2  
9  
1778  
2  
5  
7  
  
1  
  
5  
7  
5  
9  
1  
6  
6  
8  
2685  
9  
2

3  
0443  
6  
5  
4  
4  
8  
2642  
3  
2  
4  
  
2  
0  
3  
8  
8  
7550  
0  
4852  
4  
)  
7  
3  
0  
2  
7  
1  
8  
2  
7  
0  
8111  
5  
1  
6  
2  
8  
2  
9  
4  
4  
7  
1  
2  
  
0  
1  
8  
7  
1  
2

2  
5303  
4  
0080  
3  
6  
8  
3  
1  
4  
8  
1  
2  
5  
0  
3  
4  
4  
1  
7  
4  
3  
3  
4  
0  
9  
4  
5  
9  
3  
5  
5  
3  
7  
4  
4  
0  
4  
5  
5  
8  
7  
4309  
5  
9  
6  
0  
3  
1  
2  
1  
5

7  
3  
0  
2  
1683  
3  
7  
5  
5  
8

| GeneName | Description          | shNT | shLATS   | SHNT + estr | shLATS + es | shLATS vs. es | n-fold shLA |
|----------|----------------------|------|----------|-------------|-------------|---------------|-------------|
| SYTL2    | Synaptotagmin-like   | 0    | 0.320951 | 0.276863    | -0.77478    | -1.05164      | 0.088788    |
| null     | Small nuclear ribos  | 0    | -0.05212 | 0.268486    | -0.31773    | -0.58621      | 0.25929     |
| PIK3C2A  | Phosphatidylinosit   | 0    | -0.14736 | 0.056235    | -0.49148    | -0.54771      | 0.283327    |
| SNRPF    | Small nuclear ribos  | 0    | 0.269843 | 0.361807    | -0.17859    | -0.54039      | 0.288141    |
| FLNB     | Filamin-B            | 0    | -0.30722 | -0.0816     | -0.61207    | -0.53047      | 0.2948      |
| DCAF13   | DDB1- and CUL4-as    | 0    | 0.004038 | 0.186242    | -0.33345    | -0.51969      | 0.302211    |
| DAZAP1   | DAZ-associated prc   | 0    | -0.20434 | -0.01346    | -0.51185    | -0.4984       | 0.317397    |
| COX7A2L  | Cytochrome c oxid    | 0    | 0.404399 | 0.385595    | -0.09081    | -0.4764       | 0.333886    |
| BCL2L2   | Isoform 3 of Bcl-2-l | 0    | -0.03989 | 0.108689    | -0.35984    | -0.46853      | 0.339994    |
| HRNR     | Hornerin             | 0    | 0.065431 | 0.074246    | -0.38528    | -0.45953      | 0.347114    |
| EEF1G    | Elongation factor 1  | 0    | -0.26527 | -0.00936    | -0.45972    | -0.45036      | 0.354522    |
| SERPINH1 | Serpin H1            | 0    | -0.26858 | -0.01262    | -0.45715    | -0.44453      | 0.359314    |
| RAD50    | DNA repair protein   | 0    | 0.016959 | 0.063154    | -0.36477    | -0.42792      | 0.373317    |
| RPL4     | 60S ribosomal proi   | 0    | -0.10928 | 0.013766    | -0.41367    | -0.42744      | 0.373735    |
| LYAR     | Cell growth-regula   | 0    | -0.15293 | 0.006391    | -0.41559    | -0.42198      | 0.37846     |
| SFRS2    | Serine/arginine-ric  | 0    | -0.27081 | 0.028437    | -0.38678    | -0.41522      | 0.384396    |
| ZC3H11A  | Zinc finger CCCH do  | 0    | -0.00599 | 0.21545     | -0.19786    | -0.41331      | 0.386095    |
| RPS7     | 40S ribosomal proi   | 0    | -0.38707 | 0.005215    | -0.40515    | -0.41037      | 0.388714    |
| EDC4     | Enhancer of mRNA-    | 0    | -0.00775 | 0.017569    | -0.39215    | -0.40972      | 0.389297    |
| RPS5     | 40S ribosomal proi   | 0    | -0.28901 | 0.023661    | -0.38075    | -0.40441      | 0.394081    |
| COL17A1  | Collagen alpha-1(X   | 0    | 0.056921 | 0.04274     | -0.35677    | -0.39951      | 0.398554    |
| DDX39B   | HCG2005638           | 0    | -0.14318 | 0.021376    | -0.37608    | -0.39746      | 0.400447    |
| ANXA7    | Annexin              | 0    | -0.12777 | 0.020068    | -0.3709     | -0.39097      | 0.406469    |
| FAM195A  | Protein FAM195A      | 0    | -0.05202 | 0.182128    | -0.19216    | -0.37429      | 0.422385    |
| EEF1A1   | Elongation factor 1  | 0    | -0.32827 | -0.1072     | -0.48075    | -0.37355      | 0.423105    |
| MRPS23   | 28S ribosomal proi   | 0    | 0.097633 | 0.155445    | -0.21259    | -0.36804      | 0.428511    |
| AOX1     | Aldehyde oxidase     | 0    | 0.10631  | 0.30247     | -0.06171    | -0.36418      | 0.432332    |
| POR      | NADPH--cytochron     | 0    | 0.375591 | 0.288381    | -0.07564    | -0.36402      | 0.432498    |
| ATP5I    | ATP synthase subur   | 0    | -0.10478 | 0.109158    | -0.24822    | -0.35738      | 0.439162    |
| EIF2A    | Eukaryotic translat  | 0    | 0.00736  | 0.215707    | -0.13613    | -0.35184      | 0.4448      |
| SEPHS2   | Selenide             | 0    | 0.037527 | 0.179549    | -0.16226    | -0.34181      | 0.455189    |
| RAB1A    | Ras-related proteir  | 0    | -0.44383 | -0.12865    | -0.46998    | -0.34133      | 0.455688    |
| MRPS6    | 28S ribosomal proi   | 0    | 0.030133 | 0.163349    | -0.17425    | -0.3376       | 0.459622    |
| AHCTF1   | Protein ELYS         | 0    | 0.062045 | 0.091506    | -0.23866    | -0.33017      | 0.467557    |
| PCBD1    | Pterin-4-alpha-carl  | 0    | 0.210217 | 0.215517    | -0.11259    | -0.32811      | 0.469777    |
| DNAH2    | Dynein heavy chair   | 0    | -0.00098 | 0.08858     | -0.23861    | -0.32719      | 0.470767    |
| FXR1     | Fragile X mental re  | 0    | -0.10219 | 0.060299    | -0.26684    | -0.32714      | 0.470826    |
| GBP2     | Interferon-inducec   | 0    | -0.01656 | -0.08353    | -0.40576    | -0.32223      | 0.476178    |
| H2AFX    | Histone H2AX         | 0    | 0.140205 | 0.168879    | -0.14771    | -0.31659      | 0.482402    |
| MED12L   | Mediator of RNA pc   | 0    | 0.185207 | 0.127295    | -0.18618    | -0.31348      | 0.48587     |
| RPL24    | 60S ribosomal proi   | 0    | -0.2636  | 0.039965    | -0.26886    | -0.30882      | 0.491107    |
| LSM4     | U6 snRNA-associat    | 0    | 0.038861 | 0.102346    | -0.19717    | -0.29951      | 0.501752    |
| RPLP2    | 60S acidic ribosom   | 0    | 0.178371 | 0.27298     | -0.02599    | -0.29897      | 0.502377    |
| YLPM1    | YLP motif-containi   | 0    | -0.22632 | -0.07628    | -0.36983    | -0.29355      | 0.508692    |
| MRPL40   | 39S ribosomal proi   | 0    | -0.62126 | -0.21411    | -0.50454    | -0.29043      | 0.512349    |
| HNRNPF   | Heterogeneous nuc    | 0    | -0.30516 | -0.03778    | -0.32623    | -0.28845      | 0.514691    |
| SPIDR    | Protein SPIDR        | 0    | 0.005205 | -0.02066    | -0.30676    | -0.2861       | 0.517489    |
| INCA1    | Protein INCA1        | 0    | -0.10392 | -0.00962    | -0.29017    | -0.28055      | 0.524149    |
| MRPL54   | 39S ribosomal proi   | 0    | -0.0713  | 0.061197    | -0.21817    | -0.27937      | 0.525568    |
| HIST1H4A | Histone H4           | 0    | -0.11955 | 0.096669    | -0.18172    | -0.27839      | 0.526752    |
| RPS15A   | 40S ribosomal proi   | 0    | 0.02252  | 0.082316    | -0.19567    | -0.27798      | 0.527253    |

|          |                      |   |          |          |          |          |          |
|----------|----------------------|---|----------|----------|----------|----------|----------|
| SRP9     | Signal recognition   | 0 | 0.071477 | -0.01693 | -0.29162 | -0.27469 | 0.531261 |
| ACIN1    | Apoptotic chroma     | 0 | -0.18146 | 0.008578 | -0.26266 | -0.27124 | 0.535504 |
| EEF1D    | Elongation factor 1  | 0 | -0.29916 | -0.03315 | -0.30299 | -0.26984 | 0.537228 |
| GUCY2F   | Retinal guanylyl cy  | 0 | 0.044119 | 0.015215 | -0.25445 | -0.26967 | 0.53744  |
| DYNLL1   | Dynein light chain   | 0 | 0.04735  | 0.098316 | -0.16398 | -0.2623  | 0.546639 |
| HBA1     | Hemoglobin subur     | 0 | 0.050522 | 0.139577 | -0.1216  | -0.26118 | 0.548053 |
| null     | Ig kappa chain V-I r | 0 | -0.19946 | 0.006485 | -0.2512  | -0.25768 | 0.552482 |
| IQGAP1   | Ras GTPase-activati  | 0 | -0.0237  | -0.03981 | -0.29586 | -0.25605 | 0.554559 |
| DDX24    | ATP-dependent RN     | 0 | -0.13352 | 0.051879 | -0.20183 | -0.25371 | 0.557562 |
| AHNAK    | Neuroblast differer  | 0 | -0.00379 | 0.006998 | -0.2467  | -0.2537  | 0.557567 |
| SRRM2    | Serine/arginine rep  | 0 | 0.035943 | 0.167629 | -0.0848  | -0.25243 | 0.559202 |
| NKRF     | NF-kappa-B-repress   | 0 | -0.21123 | -0.01738 | -0.26981 | -0.25243 | 0.559203 |
| SSPO     | SCO-spondin          | 0 | 0.118879 | 0.029597 | -0.22133 | -0.25093 | 0.561141 |
| GTF2I    | General transcripti  | 0 | -0.09715 | 0.193964 | -0.05556 | -0.24953 | 0.562956 |
| HSPA5    | 78 kDa glucose-reg   | 0 | -0.12549 | 0.04104  | -0.20841 | -0.24945 | 0.563053 |
| ZFX      | Isoform 2 of Zinc fi | 0 | 0.160047 | 0.106876 | -0.14219 | -0.24907 | 0.563549 |
| EIF4B    | Eukaryotic translat  | 0 | 0.031561 | 0.13757  | -0.10877 | -0.24634 | 0.567099 |
| MAGEC3   | Melanoma-associa     | 0 | -0.18096 | 0.016432 | -0.22763 | -0.24407 | 0.570077 |
| CDKN2AIP | CDKN2AIP N-termi     | 0 | 0.263809 | 0.195873 | -0.04654 | -0.24241 | 0.572256 |
| FABP5    | Fatty acid-binding   | 0 | 0.084681 | 0.14119  | -0.10002 | -0.24121 | 0.573835 |
| UTP20    | Small subunit proc   | 0 | 0.026587 | 0.144473 | -0.09585 | -0.24032 | 0.575017 |
| CARS     | Isoform 3 of Cysteil | 0 | -0.099   | 0.015867 | -0.22171 | -0.23758 | 0.578658 |
| TCEB2    | Transcription elonq  | 0 | 0.025911 | 0.11276  | -0.12245 | -0.23521 | 0.581816 |
| COPA     | Coatomer subunit     | 0 | -0.08774 | -0.0057  | -0.24021 | -0.23451 | 0.582755 |
| SND1     | Staphylococcal nu    | 0 | -0.06832 | 0.089841 | -0.14086 | -0.2307  | 0.5879   |
| VARS     | Valine-tRNA ligase   | 0 | -0.11762 | -0.00538 | -0.2331  | -0.22772 | 0.591943 |
| YBX1     | Nuclease-sensitive   | 0 | 0.00672  | 0.035488 | -0.19146 | -0.22694 | 0.593003 |
| SNRPE    | Small nuclear ribor  | 0 | -0.06482 | -0.01636 | -0.24018 | -0.22382 | 0.597285 |
| SOGA1    | C-terminal 80 kDa i  | 0 | 0.115963 | 0.083039 | -0.13971 | -0.22275 | 0.598759 |
| MRPL50   | 39S ribosomal pro    | 0 | -0.07209 | 0.065838 | -0.15656 | -0.22239 | 0.599247 |
| VAPB     | Vesicle-associated i | 0 | -6.1E-05 | 0.036142 | -0.18217 | -0.21831 | 0.604904 |
| MEPCE    | 7SK snRNA methylq    | 0 | 0.004994 | 0.034151 | -0.18242 | -0.21657 | 0.607335 |
| CTTN     | Src substrate corta  | 0 | -0.10976 | -0.00627 | -0.22218 | -0.21591 | 0.608257 |
| SNRPD1   | Small nuclear ribor  | 0 | 0.029105 | 0.161956 | -0.05242 | -0.21438 | 0.610413 |
| SRRM1    | Serine/arginine rep  | 0 | -0.07365 | -0.05813 | -0.26968 | -0.21156 | 0.614387 |
| SLC7A5   | Large neutral amin   | 0 | -0.03907 | 0.132438 | -0.07683 | -0.20927 | 0.617638 |
| SNRPD2   | Small nuclear ribor  | 0 | -0.02164 | 0.089738 | -0.11585 | -0.20559 | 0.622889 |
| RPL31    | 60S ribosomal pro    | 0 | 0.103492 | 0.184465 | -0.02074 | -0.20521 | 0.623436 |
| KARS     | Lysine-tRNA ligase   | 0 | 0.0704   | 0.166972 | -0.03814 | -0.20511 | 0.623576 |
| SF1      | Steroidogenic factr  | 0 | -0.18703 | 0.068282 | -0.13622 | -0.2045  | 0.624457 |
| FUBP1    | Isoform 2 of Far up  | 0 | 0.009719 | 0.098706 | -0.10402 | -0.20272 | 0.627011 |
| SYNE1    | Nesprin-1            | 0 | -0.04089 | 0.103448 | -0.09691 | -0.20036 | 0.630438 |
| EEF1A2   | Elongation factor 1  | 0 | -0.15411 | -0.05981 | -0.2597  | -0.19989 | 0.631122 |
| RPL38    | 60S ribosomal pro    | 0 | -0.01535 | 0.075941 | -0.1189  | -0.19484 | 0.6385   |
| RGAG1    | Retrotransposon g    | 0 | -0.02614 | 0.069646 | -0.1244  | -0.19405 | 0.639667 |
| NSD1     | Histone-lysine N-m   | 0 | 0.005459 | -0.00546 | -0.19914 | -0.19369 | 0.640198 |
| AHNAK2   | Protein AHNAK2       | 0 | -0.03609 | 0.208255 | 0.014603 | -0.19365 | 0.640248 |
| C8orf33  | UPF0488 protein C    | 0 | 0.033523 | 0.027237 | -0.16361 | -0.19085 | 0.644396 |
| PYGB     | Glycogen phospho     | 0 | 0.215034 | 0.312877 | 0.122144 | -0.19073 | 0.644566 |
| COL6A3   | Collagen alpha-3(V   | 0 | 0.038717 | 0.075121 | -0.11497 | -0.19009 | 0.645522 |
| TIA1     | Nucleolysin TIA-1 i  | 0 | -0.11444 | 0.037638 | -0.15209 | -0.18973 | 0.646053 |
| EWSR1    | RNA-binding prote    | 0 | -0.35921 | -0.10769 | -0.29495 | -0.18726 | 0.649745 |



|          |                     |   |          |          |          |          |          |
|----------|---------------------|---|----------|----------|----------|----------|----------|
| LMNB1    | Lamin-B1            | 0 | -0.01119 | -0.05524 | -0.242   | -0.18676 | 0.65049  |
| PRPF3    | U4/U6 small nucle   | 0 | -0.08347 | 0.013581 | -0.17255 | -0.18613 | 0.65143  |
| UBE2N    | Ubiquitin-conjuga   | 0 | 0.108658 | 0.173256 | -0.01195 | -0.18521 | 0.652822 |
| RPL35A   | 60S ribosomal pro   | 0 | 0.019183 | 0.033675 | -0.15095 | -0.18463 | 0.653692 |
| POLR2L   | DNA-directed RNA    | 0 | -0.14882 | -0.02024 | -0.20245 | -0.18222 | 0.65733  |
| THUMPD3  | THUMP domain-co     | 0 | -0.02665 | 0.062836 | -0.11916 | -0.182   | 0.657663 |
| FRMPD3   | FERM and PDZ dom    | 0 | -0.01329 | 0.067969 | -0.11382 | -0.18179 | 0.657972 |
| CALML5   | Calmodulin-like pr  | 0 | 0.025173 | 0.03671  | -0.1444  | -0.18111 | 0.659    |
| ERH      | Enhancer of rudim   | 0 | 0.037811 | -0.05624 | -0.23435 | -0.17811 | 0.66358  |
| CHD3     | Chromodomain-he     | 0 | -0.07284 | 0.022015 | -0.15452 | -0.17654 | 0.665985 |
| SCRIB    | Protein scribble hc | 0 | 0.047272 | 0.104679 | -0.07185 | -0.17653 | 0.665994 |
| OGT      | UDP-N-acetylgluco   | 0 | 0.154694 | 0.073659 | -0.10185 | -0.17551 | 0.667555 |
| DNAH3    | Dynein heavy chair  | 0 | -0.06985 | -0.01805 | -0.19263 | -0.17458 | 0.668984 |
| HJURP    | Holliday junction r | 0 | -0.18676 | -0.01199 | -0.18597 | -0.17399 | 0.669907 |
| TOP3B    | DNA topoisomeras    | 0 | 0.040067 | 0.230266 | 0.057471 | -0.17279 | 0.671747 |
| DYNC1H1  | Cytoplasmic dynei   | 0 | 0.149271 | -0.07255 | -0.24482 | -0.17227 | 0.672554 |
| HSPE1    | 10 kDa heat shock   | 0 | 0.286591 | 0.167421 | -0.00383 | -0.17125 | 0.674137 |
| RBM22    | Pre-mRNA-splicing   | 0 | -0.00873 | 0.008504 | -0.16219 | -0.1707  | 0.674998 |
| SEC61B   | Protein transport   | 0 | 0.1897   | 0.123527 | -0.04694 | -0.17047 | 0.675351 |
| ALS2CR11 | Amyotrophic later   | 0 | 0.012008 | 0.008595 | -0.15972 | -0.16831 | 0.678713 |
| SBSN     | Suprabasin          | 0 | 0.005017 | 0.060709 | -0.10739 | -0.1681  | 0.679047 |
| PREX1    | Phosphatidylinosit  | 0 | -0.10485 | 0.062605 | -0.10479 | -0.16739 | 0.680153 |
| DYNLL2   | Dynein light chain  | 0 | 0.11183  | 0.140289 | -0.02704 | -0.16733 | 0.680251 |
| DHX57    | Putative ATP-deper  | 0 | -0.18628 | 0.007286 | -0.1593  | -0.16659 | 0.681415 |
| RPS20    | 40S ribosomal pro   | 0 | 0.014988 | 0.082034 | -0.0845  | -0.16653 | 0.681501 |
| TAF15    | TATA-binding prote  | 0 | -0.03223 | 0.043118 | -0.12299 | -0.1661  | 0.682177 |
| RUVBL2   | RuvB-like 2         | 0 | -0.0741  | -0.02314 | -0.18749 | -0.16434 | 0.684948 |
| SNED1    | Sushi               | 0 | 0.193405 | 0.142491 | -0.02158 | -0.16407 | 0.685378 |
| MTERFD1  | mTERF domain-cor    | 0 | -0.09724 | 0.032103 | -0.13142 | -0.16353 | 0.686238 |
| GRWD1    | Glutamate-rich WI   | 0 | 0.008285 | -0.00016 | -0.16115 | -0.16099 | 0.690263 |
| YTHDF3   | YTH domain family   | 0 | -0.01253 | 0.016515 | -0.1434  | -0.15991 | 0.691972 |
| LARS     | Leucine-tRNA liga   | 0 | 0.030358 | 0.090544 | -0.06627 | -0.15681 | 0.696927 |
| RPS28    | 40S ribosomal pro   | 0 | 0.099938 | 0.155275 | -0.00056 | -0.15584 | 0.698492 |
| TXN      | Thioredoxin         | 0 | 0.002741 | 0.045356 | -0.11016 | -0.15552 | 0.699012 |
| NGRN     | Neugrin             | 0 | 0.12101  | 0.077163 | -0.07776 | -0.15493 | 0.699958 |
| EIF3E    | Eukaryotic translat | 0 | 0.073753 | 0.081361 | -0.07299 | -0.15435 | 0.700894 |
| WDFY3    | WD repeat and FYV   | 0 | 0.069212 | 0.124626 | -0.0283  | -0.15293 | 0.703192 |
| AURKAIP1 | Aurora kinase A-int | 0 | 0.099209 | 0.166229 | 0.015168 | -0.15106 | 0.706218 |
| RANBP6   | Ran-binding protei  | 0 | 0.012358 | 0.057903 | -0.09296 | -0.15086 | 0.706538 |
| UPF1     | Isoform 2 of Regul  | 0 | 0.076622 | 0.18874  | 0.037876 | -0.15086 | 0.706539 |
| ANKRD52  | Serine/threonine-p  | 0 | 0.130335 | 0.040411 | -0.10983 | -0.15024 | 0.707551 |
| CPSF7    | Cleavage and polya  | 0 | 0.124608 | -0.05125 | -0.20129 | -0.15004 | 0.707885 |
| RPS10    | 40S ribosomal pro   | 0 | 0.002584 | 0.077349 | -0.07172 | -0.14907 | 0.709464 |
| HNRNPM   | Heterogeneous nuc   | 0 | 0.038637 | 0.036272 | -0.11254 | -0.14882 | 0.709878 |
| BRWD3    | Bromodomain and     | 0 | 0.018159 | 0.058755 | -0.08918 | -0.14794 | 0.711319 |
| RPLP1    | 60S acidic ribosom  | 0 | 0.125074 | -0.03448 | -0.18122 | -0.14674 | 0.713283 |
| NAT10    | N-acetyltransferase | 0 | -0.14477 | 0.000964 | -0.14571 | -0.14667 | 0.713389 |
| RPL23    | 60S ribosomal pro   | 0 | 0.018893 | 0.095883 | -0.04906 | -0.14494 | 0.716245 |
| ATP2A2   | Sarcoplasmic/endc   | 0 | -0.03349 | 0.047326 | -0.09699 | -0.14432 | 0.717264 |
| MRPS14   | 28S ribosomal pro   | 0 | 0.005854 | -0.09952 | -0.24246 | -0.14294 | 0.719549 |
| AKAP1    | A-kinase anchor pr  | 0 | -0.0745  | 0.180459 | 0.039576 | -0.14088 | 0.722964 |
| HIST1H1E | Histone H1.4        | 0 | 0.073822 | 0.101084 | -0.03872 | -0.13981 | 0.724755 |

|          |                      |   |          |          |          |          |          |
|----------|----------------------|---|----------|----------|----------|----------|----------|
| TNRC6B   | Isoform 2 of Trinuc  | 0 | -0.10973 | -0.00299 | -0.14225 | -0.13927 | 0.725661 |
| NDUFA4   | NADH dehydrogen      | 0 | 0.001676 | 0.038689 | -0.10028 | -0.13897 | 0.726158 |
| ANGEL1   | Protein angel hom    | 0 | 0.204837 | 0.237232 | 0.100302 | -0.13693 | 0.729575 |
| HNRNPR   | Heterogeneous nuc    | 0 | -0.04906 | -0.18387 | -0.3202  | -0.13632 | 0.730593 |
| SART3    | SART3 protein        | 0 | -0.07358 | 0.057775 | -0.07731 | -0.13509 | 0.732674 |
| KIAA1671 | Uncharacterized pr   | 0 | 0.181606 | 0.052261 | -0.08276 | -0.13502 | 0.732788 |
| SIPA1L2  | Signal-induced pro   | 0 | 0.062019 | 0.083417 | -0.05137 | -0.13478 | 0.733192 |
| RPS3     | 40S ribosomal pro    | 0 | 0.025356 | 0.136789 | 0.003257 | -0.13353 | 0.735305 |
| FMR1     | Fragile X mental re  | 0 | 0.014137 | 0.089092 | -0.04443 | -0.13353 | 0.735316 |
| RPL7A    | 60S ribosomal pro    | 0 | -0.11101 | 0.051574 | -0.08189 | -0.13346 | 0.735423 |
| H1FO     | Histone H1.0         | 0 | -0.09307 | -0.03405 | -0.16718 | -0.13313 | 0.735982 |
| SSBP1    | Single-stranded DN   | 0 | -0.02728 | 0.016351 | -0.11675 | -0.1331  | 0.736041 |
| CXorf22  | Uncharacterized pr   | 0 | 0.050452 | 0.026383 | -0.10638 | -0.13276 | 0.736614 |
| RPL3     | 60S ribosomal pro    | 0 | -0.03661 | -0.09305 | -0.22455 | -0.13149 | 0.738764 |
| DPM3     | Dolichol-phosphat    | 0 | 0.167705 | 0.131927 | 0.000502 | -0.13143 | 0.738881 |
| PDS5B    | Sister chromatid cr  | 0 | 0.055343 | 0.054625 | -0.07679 | -0.13142 | 0.738897 |
| HSPA9    | Stress-70 protein    | 0 | -0.01418 | 0.051511 | -0.0796  | -0.13111 | 0.73942  |
| MRPS33   | 28S ribosomal pro    | 0 | -0.11927 | 0.067101 | -0.06353 | -0.13063 | 0.74024  |
| USP34    | Ubiquitin carboxyl   | 0 | -0.0683  | -0.02338 | -0.15368 | -0.13029 | 0.74081  |
| CASP14   | Caspase-14           | 0 | 0.180712 | 0.111747 | -0.01844 | -0.13019 | 0.740989 |
| MRPS16   | 28S ribosomal pro    | 0 | -0.04329 | 0.08477  | -0.04496 | -0.12973 | 0.74177  |
| MRPS21   | 28S ribosomal pro    | 0 | -0.16444 | -0.09053 | -0.21932 | -0.12879 | 0.743375 |
| PSMC3    | 26S protease regul   | 0 | -0.0581  | -0.08532 | -0.21374 | -0.12842 | 0.744007 |
| PPP1R10  | Serine/threonine-p   | 0 | 0.044956 | 0.073163 | -0.05483 | -0.12799 | 0.744745 |
| MRPL49   | 39S ribosomal pro    | 0 | 0.111397 | 0.164042 | 0.036954 | -0.12709 | 0.746298 |
| LRRCS9   | Leucine-rich repea   | 0 | 0.073559 | 0.052132 | -0.07356 | -0.12569 | 0.748708 |
| NHP2L1   | NHP2-like protein    | 0 | -0.04771 | -0.02198 | -0.1474  | -0.12541 | 0.749182 |
| NUDT16L1 | Protein syndesmos    | 0 | -0.05605 | -0.0811  | -0.20585 | -0.12475 | 0.750324 |
| COX4I1   | Cytochrome c oxid    | 0 | 0.06167  | 0.070336 | -0.05327 | -0.12361 | 0.752302 |
| INVS     | Inversin             | 0 | 0.091316 | 0.013196 | -0.11008 | -0.12327 | 0.752884 |
| CRNKL1   | Crooked neck-like p  | 0 | 0.27116  | -0.00338 | -0.12574 | -0.12236 | 0.754463 |
| DDX21    | Nucleolar RNA heli   | 0 | -0.1038  | 0.050305 | -0.07074 | -0.12104 | 0.75676  |
| SLC25A5  | ADP/ATP transloca    | 0 | 0.011131 | 0.081047 | -0.03813 | -0.11918 | 0.760018 |
| SF3B3    | Splicing factor 3B s | 0 | 0.009194 | 0.069944 | -0.04818 | -0.11812 | 0.761865 |
| RPL27    | 60S ribosomal pro    | 0 | -0.11144 | 0.021433 | -0.09663 | -0.11806 | 0.761973 |
| EIF4G1   | Eukaryotic translat  | 0 | -0.07564 | 0.040169 | -0.07691 | -0.11708 | 0.763689 |
| RPL17    | 60S ribosomal pro    | 0 | 0.022    | 0.064191 | -0.04991 | -0.1141  | 0.768948 |
| HADHA    | Trifunctional enzyr  | 0 | -0.00447 | 0.070422 | -0.04363 | -0.11405 | 0.769044 |
| LOXL2    | Lysyl oxidase homc   | 0 | 0.007733 | 0.068683 | -0.04534 | -0.11403 | 0.769086 |
| FAM98A   | Protein FAM98A       | 0 | -0.03121 | -0.0442  | -0.15795 | -0.11375 | 0.769577 |
| EEF1B2   | Elongation factor 1  | 0 | -0.18283 | -0.01558 | -0.12824 | -0.11267 | 0.771492 |
| NCBP2    | Nuclear cap-bindir   | 0 | 0.377965 | 0.235538 | 0.123037 | -0.1125  | 0.77179  |
| MYOF     | Myoferlin            | 0 | 0.064646 | 0.058979 | -0.05349 | -0.11247 | 0.771849 |
| RPS6     | 40S ribosomal pro    | 0 | 0.08758  | 0.027247 | -0.0851  | -0.11235 | 0.772056 |
| MCM4     | DNA replication lic  | 0 | 0.008104 | 0.01601  | -0.09618 | -0.11219 | 0.772334 |
| RBM17    | Splicing factor 45 ( | 0 | -0.04383 | -0.0467  | -0.15884 | -0.11214 | 0.772427 |
| RANBP2   | Putative peptidyl-p  | 0 | 0.003317 | 0.153439 | 0.042512 | -0.11093 | 0.774591 |
| ALYREF   | THO complex subu     | 0 | 0.084507 | 0.059107 | -0.05122 | -0.11033 | 0.775661 |
| NUP214   | Nuclear pore comp    | 0 | -0.00367 | -0.0464  | -0.15443 | -0.10802 | 0.779789 |
| RBM14    | Protein RBM14-RB     | 0 | -0.14762 | -0.10858 | -0.2163  | -0.10772 | 0.780325 |
| NEB      | Nebulin              | 0 | -0.00056 | 0.009274 | -0.09845 | -0.10772 | 0.780334 |
| WDR33    | pre-mRNA 3' end pi   | 0 | -0.03193 | 0.009259 | -0.09777 | -0.10703 | 0.781578 |

|          |                      |   |          |          |          |          |          |
|----------|----------------------|---|----------|----------|----------|----------|----------|
| NCL      | Nucleolin            | 0 | -0.02251 | 0.005729 | -0.10074 | -0.10647 | 0.782585 |
| WBP2     | WW domain-bindi      | 0 | 0.051518 | 0.019305 | -0.08715 | -0.10646 | 0.782605 |
| USP49    | Ubiquitin carboxyl   | 0 | -0.03278 | 0.010709 | -0.09537 | -0.10608 | 0.783285 |
| FSIP2    | Fibrous sheath-inte  | 0 | 0.028565 | -0.00565 | -0.11133 | -0.10568 | 0.78401  |
| CCDC177  | Coiled-coil domain   | 0 | 0.045522 | 0.059572 | -0.04586 | -0.10543 | 0.784458 |
| RPS2     | 40S ribosomal proi   | 0 | 0.074733 | 0.116128 | 0.01113  | -0.105   | 0.785239 |
| SNRPD3   | Small nuclear ribor  | 0 | -0.02067 | 0.059146 | -0.04523 | -0.10437 | 0.78637  |
| SLC39A7  | Zinc transporter SL  | 0 | 0.064427 | -0.03512 | -0.13943 | -0.10431 | 0.786486 |
| LSM2     | U6 snRNA-associat    | 0 | 0.019057 | 0.004587 | -0.09957 | -0.10416 | 0.786755 |
| LRPPRC   | Leucine-rich PPR n   | 0 | -0.14569 | 0.005388 | -0.09742 | -0.10281 | 0.789207 |
| LARP4B   | La-related protein   | 0 | -0.03281 | 0.039675 | -0.06286 | -0.10253 | 0.789711 |
| YBX3     | Isoform 2 of Y-box-  | 0 | 0.092909 | 0.030212 | -0.07217 | -0.10238 | 0.789987 |
| CENPE    | Centromere-associ    | 0 | 0.017614 | 0.068454 | -0.03338 | -0.10184 | 0.790979 |
| FAM83B   | Protein FAM83B       | 0 | -0.04843 | -0.0008  | -0.10131 | -0.1005  | 0.793405 |
| KRR1     | KRR1 small subuni    | 0 | -0.09243 | -0.0967  | -0.19705 | -0.10035 | 0.793684 |
| MYCBP2   | Probable E3 ubiqui   | 0 | 0.060539 | 0.027032 | -0.07303 | -0.10006 | 0.794222 |
| GART     | Trifunctional purin  | 0 | -0.02213 | 0.003524 | -0.09565 | -0.09917 | 0.795841 |
| PNPT1    | Polyribonucleotidi   | 0 | 0.004848 | 0.036382 | -0.06235 | -0.09873 | 0.796651 |
| FLG2     | Filaggrin-2          | 0 | 0.020095 | -0.14194 | -0.24065 | -0.09871 | 0.7967   |
| RCHY1    | RING finger and CH   | 0 | -0.03094 | 0.096805 | -0.0018  | -0.09861 | 0.79688  |
| MDN1     | Midasin              | 0 | 0.00483  | -0.03729 | -0.13541 | -0.09812 | 0.797774 |
| HP1BP3   | Heterochromatin p    | 0 | 0.017339 | -0.10756 | -0.20558 | -0.09803 | 0.797944 |
| DAD1     | Dolichyl-diphosph    | 0 | 0.106509 | 0.168146 | 0.070628 | -0.09752 | 0.798881 |
| CISD2    | CDGSH iron-sulfur    | 0 | 0.0655   | -0.02151 | -0.11843 | -0.09692 | 0.799982 |
| U2AF1    | Splicing factor U2A  | 0 | 0.048816 | 0.152111 | 0.055396 | -0.09672 | 0.800358 |
| TRAF2    | TNF receptor-assoc   | 0 | -0.00703 | 0.103666 | 0.008244 | -0.09542 | 0.802745 |
| DDX23    | Probable ATP-depe    | 0 | -0.0344  | 0.037175 | -0.05773 | -0.0949  | 0.803706 |
| DNM2     | Dynammin-2           | 0 | 0.089629 | 0.054626 | -0.04013 | -0.09476 | 0.803973 |
| KPNB1    | Importin subunit b   | 0 | -0.05701 | 0.027595 | -0.06709 | -0.09468 | 0.804109 |
| GPRASP2  | G-protein coupled    | 0 | 0.068718 | -0.04908 | -0.14308 | -0.094   | 0.805374 |
| RPL22    | 60S ribosomal proi   | 0 | 0.246487 | 0.273746 | 0.1804   | -0.09335 | 0.806593 |
| PRDX1    | Peroxiredoxin-1      | 0 | 0.691597 | 0.241835 | 0.149853 | -0.09198 | 0.809129 |
| ATP1A1   | Sodium/potassium     | 0 | -0.06907 | 0.034123 | -0.05762 | -0.09175 | 0.809571 |
| MRPS24   | 28S ribosomal proi   | 0 | 0.018452 | 0.162313 | 0.071175 | -0.09114 | 0.810702 |
| REM1     | GTP-binding protei   | 0 | -0.13319 | -0.09899 | -0.18971 | -0.09073 | 0.811473 |
| DHX30    | Putative ATP-deper   | 0 | -0.0401  | 0.013671 | -0.07678 | -0.09045 | 0.811982 |
| SRP72    | Signal recognition   | 0 | -0.07407 | -0.03342 | -0.12332 | -0.08991 | 0.813003 |
| PFN2     | Profilin-2           | 0 | 0.260423 | 0.288869 | 0.199929 | -0.08894 | 0.814818 |
| TNRC6C   | Trinucleotide repe   | 0 | -0.04471 | -0.01781 | -0.10532 | -0.08751 | 0.817502 |
| EEF2     | Elongation factor 2  | 0 | -0.03168 | 0.047221 | -0.03935 | -0.08657 | 0.819275 |
| PRMT6    | Protein arginine N-  | 0 | -0.06215 | -0.03241 | -0.11892 | -0.08651 | 0.819398 |
| LSG1     | Large subunit GTPa   | 0 | -0.02109 | 0.003163 | -0.08286 | -0.08602 | 0.820309 |
| KTN1     | Kinectin             | 0 | -0.06665 | -0.03338 | -0.11934 | -0.08596 | 0.82042  |
| LGALS3BP | Galectin-3-binding   | 0 | -0.01149 | 0.06276  | -0.02291 | -0.08567 | 0.820968 |
| POLR3A   | DNA-directed RNA     | 0 | -0.22298 | -0.0784  | -0.16311 | -0.08471 | 0.822793 |
| SF3B2    | Splicing factor 3B s | 0 | -0.07539 | 0.003282 | -0.08069 | -0.08398 | 0.824185 |
| EPPK1    | Epiplakin            | 0 | 0.153566 | 0.099937 | 0.016268 | -0.08367 | 0.824766 |
| DENND3   | DENN domain-coni     | 0 | -0.08375 | -0.03489 | -0.11777 | -0.08289 | 0.826249 |
| CMYA5    | Cardiomyopathy-a     | 0 | -0.05135 | 0.047776 | -0.03433 | -0.0821  | 0.827748 |
| RPS16    | 40S ribosomal proi   | 0 | 0.591124 | 0.504294 | 0.423278 | -0.08102 | 0.82982  |
| QARS     | Bifunctional glutar  | 0 | -0.13792 | -0.03772 | -0.11829 | -0.08057 | 0.830671 |
| MAP4     | Microtubule-assoc    | 0 | -0.05932 | 0.017777 | -0.06224 | -0.08001 | 0.831735 |

|          |                      |   |          |          |          |          |          |
|----------|----------------------|---|----------|----------|----------|----------|----------|
| SIPA1L1  | Signal-induced pro   | 0 | -0.02257 | -0.02993 | -0.10993 | -0.08    | 0.831754 |
| PLP2     | Proteolipid protein  | 0 | -0.05234 | 0.098827 | 0.019243 | -0.07958 | 0.83256  |
| SRSF7    | Serine/arginine-ric  | 0 | 0.005195 | 0.042773 | -0.03585 | -0.07863 | 0.834398 |
| HDLBP    | Vigilin              | 0 | 0.012494 | 0.063041 | -0.01537 | -0.07841 | 0.834807 |
| SMARCC1  | SWI/SNF complex s    | 0 | -0.13367 | -0.04333 | -0.12103 | -0.0777  | 0.83618  |
| MAP7     | Ensconsin            | 0 | -0.04589 | 0.017172 | -0.05844 | -0.07562 | 0.840203 |
| SSB      | Lupus La protein     | 0 | -0.00112 | -0.03077 | -0.10629 | -0.07552 | 0.840393 |
| RRP12    | RRP12-like protein   | 0 | -0.05508 | 0.033184 | -0.03972 | -0.0729  | 0.845474 |
| RPS18    | 40S ribosomal proi   | 0 | 0.069982 | 0.035123 | -0.03684 | -0.07197 | 0.847292 |
| C1orf173 | Uncharacterized pr   | 0 | 0.054725 | 0.008693 | -0.0629  | -0.07159 | 0.848028 |
| LTF      | Kaliocin-1 (Fragme   | 0 | -0.02876 | -0.05273 | -0.12412 | -0.07139 | 0.848421 |
| DIDO1    | Death-inducer obli   | 0 | -0.03759 | -0.0014  | -0.07183 | -0.07043 | 0.850291 |
| FBL      | rRNA 2'-O-methyltr   | 0 | -0.02794 | -0.00463 | -0.07458 | -0.06994 | 0.851246 |
| TRIB3    | Tribbles homolog 3   | 0 | 0.215741 | 0.168068 | 0.099788 | -0.06828 | 0.854516 |
| HNRNPU   | Heterogeneous nuc    | 0 | 0.01363  | 0.016448 | -0.05167 | -0.06812 | 0.85484  |
| RAB5A    | Ras-related protein  | 0 | -0.18049 | 0.06394  | -0.0036  | -0.06754 | 0.855975 |
| RRP1B    | Ribosomal RNA pro    | 0 | -0.07618 | 0.000157 | -0.06714 | -0.0673  | 0.856453 |
| GIGYF2   | PERQ amino acid-ri   | 0 | -0.04074 | 0.006891 | -0.06022 | -0.06711 | 0.856828 |
| DNAH12   | Dynein heavy chain   | 0 | -0.02415 | -0.09044 | -0.15509 | -0.06464 | 0.861699 |
| ATXN2    | Ataxin-2 (Fragment   | 0 | -0.04699 | 0.007732 | -0.0566  | -0.06433 | 0.862317 |
| MRPS22   | 28S ribosomal proi   | 0 | 0.008105 | 0.012819 | -0.05097 | -0.06379 | 0.86339  |
| RPL10A   | 60S ribosomal proi   | 0 | 0.007635 | 0.002058 | -0.06141 | -0.06347 | 0.864035 |
| AGL      | Glycogen debranch    | 0 | 0.020444 | 0.060627 | -0.00245 | -0.06307 | 0.864821 |
| USP9Y    | Probable ubiquitin   | 0 | -0.06307 | 0.064186 | 0.001305 | -0.06288 | 0.865206 |
| TARDBP   | TAR DNA-binding p    | 0 | -0.07871 | -0.0789  | -0.14124 | -0.06234 | 0.86628  |
| SMARCE1  | SWI/SNF-related m    | 0 | 0.01434  | -0.02214 | -0.08441 | -0.06227 | 0.866432 |
| SRSF9    | Serine/arginine-ric  | 0 | -0.10264 | 0.058036 | -0.00405 | -0.06209 | 0.866784 |
| PARP4    | Poly [ADP-ribose] p  | 0 | 0.006621 | 0.030673 | -0.03136 | -0.06203 | 0.866893 |
| RPS12    | 40S ribosomal proi   | 0 | 0.075991 | 0.12486  | 0.062842 | -0.06202 | 0.866926 |
| MCM7     | DNA replication lic  | 0 | -0.05787 | -0.02097 | -0.08285 | -0.06188 | 0.867209 |
| SAP18    | Histone deacetylase  | 0 | -0.08025 | -0.03322 | -0.09495 | -0.06173 | 0.867495 |
| SQSTM1   | Sequestosome-1       | 0 | -0.0736  | -0.10734 | -0.16885 | -0.06151 | 0.867943 |
| MRPS17   | 28S ribosomal proi   | 0 | 0.432133 | 0.399827 | 0.338368 | -0.06146 | 0.868042 |
| BCAS2    | Pre-mRNA-splicing    | 0 | -0.06694 | -0.05047 | -0.11141 | -0.06094 | 0.86908  |
| EWSR1    | Ewing sarcoma bre    | 0 | -0.02717 | 0.06442  | 0.003511 | -0.06091 | 0.869142 |
| AP2M1    | AP-2 complex subu    | 0 | 0.034884 | 0.04747  | -0.01341 | -0.06088 | 0.869207 |
| RPS21    | 40S ribosomal proi   | 0 | -0.03391 | 0.037367 | -0.02343 | -0.06079 | 0.869372 |
| RPL36A   | 60S ribosomal proi   | 0 | 0.366306 | 0.350543 | 0.290361 | -0.06018 | 0.870599 |
| RBBP8NL  | RBBP8 N-terminal-    | 0 | 0.080156 | 0.14886  | 0.088775 | -0.06009 | 0.870792 |
| SEC31A   | Protein transport p  | 0 | 0.035895 | -0.01865 | -0.07814 | -0.05949 | 0.871994 |
| BTA1F1   | TATA-binding prote   | 0 | 0.111071 | -0.00189 | -0.06005 | -0.05816 | 0.874659 |
| EIF3C    | Eukaryotic translat  | 0 | 0.007833 | 0.077283 | 0.021165 | -0.05612 | 0.878784 |
| ZFR      | Zinc finger RNA-bin  | 0 | -0.04657 | -0.0066  | -0.06227 | -0.05567 | 0.879688 |
| RPS19    | 40S ribosomal proi   | 0 | 0.659142 | 0.509605 | 0.454834 | -0.05477 | 0.881514 |
| FAM83H   | Protein FAM83H       | 0 | -0.08389 | -0.00498 | -0.05952 | -0.05454 | 0.881974 |
| PARP1    | Poly [ADP-ribose] p  | 0 | 0.052217 | 0.044123 | -0.00969 | -0.05382 | 0.883454 |
| SCAF4    | Splicing factor      | 0 | -0.09258 | -0.06193 | -0.11567 | -0.05374 | 0.883603 |
| YTHDF1   | YTH domain family    | 0 | 0.057635 | 0.011433 | -0.04226 | -0.05369 | 0.883713 |
| DHX36    | Probable ATP-depe    | 0 | -0.05004 | 0.022812 | -0.02941 | -0.05222 | 0.886704 |
| RBM28    | RNA-binding prote    | 0 | -0.07826 | -0.03144 | -0.08329 | -0.05185 | 0.887465 |
| UPF2     | Regulator of nonse   | 0 | 0.023846 | 0.021571 | -0.02965 | -0.05123 | 0.888741 |
| CHCHD3   | Coiled-coil-helix-co | 0 | 0.038952 | -0.02452 | -0.0752  | -0.05068 | 0.889847 |

|          |                      |   |          |          |          |          |          |
|----------|----------------------|---|----------|----------|----------|----------|----------|
| MYH14    | Myosin-14            | 0 | 0.043224 | 0.064334 | 0.013706 | -0.05063 | 0.889964 |
| STRBP    | Spermatid perinuc    | 0 | 0.039313 | 0.014988 | -0.03516 | -0.05015 | 0.890938 |
| CCAR1    | Cell division cycle  | 0 | -0.02139 | 0.042021 | -0.006   | -0.04802 | 0.89532  |
| RPS27    | 40S ribosomal pro    | 0 | 0.005253 | 0.039598 | -0.0082  | -0.0478  | 0.895771 |
| MRPL41   | 39S ribosomal pro    | 0 | 0.087092 | 0.089658 | 0.042755 | -0.0469  | 0.897629 |
| MRPL27   | 39S ribosomal pro    | 0 | 0.002457 | 0.055586 | 0.008921 | -0.04667 | 0.898121 |
| LYZ      | Lysozyme C           | 0 | 0.064179 | 0.014846 | -0.03125 | -0.0461  | 0.899293 |
| LSM14B   | Protein LSM14 hor    | 0 | 0.098249 | -0.03158 | -0.07724 | -0.04566 | 0.900203 |
| MCM5     | DNA replication lic  | 0 | -0.05257 | -0.0933  | -0.13882 | -0.04552 | 0.900492 |
| TTN      | Titin                | 0 | -0.04207 | -0.03836 | -0.08323 | -0.04486 | 0.901852 |
| SERBP1   | Plasminogen activa   | 0 | 0.092353 | 0.076086 | 0.03217  | -0.04392 | 0.903825 |
| MYO1E    | Unconventional m     | 0 | -0.0107  | 0.01402  | -0.02955 | -0.04356 | 0.904555 |
| EIF2S1   | Eukaryotic translat  | 0 | -0.06251 | -0.00893 | -0.05211 | -0.04318 | 0.905359 |
| RPL14    | 60S ribosomal pro    | 0 | 0.051658 | 0.037872 | -0.00481 | -0.04268 | 0.906403 |
| YTHDC1   | YTH domain-contai    | 0 | -0.01725 | 0.079584 | 0.037399 | -0.04219 | 0.907434 |
| PCBP2    | Poly(rC)-binding pr  | 0 | -0.04172 | 0.030851 | -0.01108 | -0.04193 | 0.907975 |
| SEC14L6  | Putative SEC14-like  | 0 | -0.00203 | 0.046287 | 0.004464 | -0.04182 | 0.90819  |
| PDCD6IP  | Programmed cell d    | 0 | -0.07272 | 0.015122 | -0.02662 | -0.04174 | 0.908361 |
| TSPYL5   | Testis-specific Y-en | 0 | -0.17353 | -0.12743 | -0.16881 | -0.04139 | 0.909105 |
| MRPL14   | 39S ribosomal pro    | 0 | -0.06212 | 0.070365 | 0.029044 | -0.04132 | 0.909241 |
| MYO6     | Unconventional m     | 0 | 0.042886 | -0.00979 | -0.05065 | -0.04086 | 0.910205 |
| IPO7     | Importin-7           | 0 | -0.20406 | 0.023338 | -0.01735 | -0.04069 | 0.910564 |
| C2orf18  | Chromosome 2 op      | 0 | 0.07917  | 0.146226 | 0.106042 | -0.04018 | 0.911625 |
| CPSF1    | Cleavage and polya   | 0 | -0.09779 | 0.009025 | -0.03114 | -0.04016 | 0.91167  |
| TUBA4B   | Putative tubulin-lil | 0 | -0.04909 | -0.04164 | -0.08121 | -0.03957 | 0.912913 |
| IARS     | Isoleucine-tRNA li   | 0 | -0.07417 | -0.00176 | -0.04053 | -0.03877 | 0.914606 |
| FLNA     | Filamin-A            | 0 | -0.12574 | -0.1037  | -0.14216 | -0.03846 | 0.915255 |
| MRPS26   | 28S ribosomal pro    | 0 | 0.021378 | 0.076089 | 0.038213 | -0.03788 | 0.916483 |
| PLEC     | Plectin              | 0 | 0.103528 | 0.039752 | 0.002181 | -0.03757 | 0.917127 |
| LSM14A   | Protein LSM14 hor    | 0 | 0.069015 | 0.026084 | -0.01025 | -0.03633 | 0.919745 |
| C1orf194 | Uncharacterized pr   | 0 | -0.00064 | -0.02304 | -0.05878 | -0.03574 | 0.921005 |
| RPS27A   | Ubiquitin-40S ribo   | 0 | -0.01484 | -0.00479 | -0.04047 | -0.03567 | 0.921141 |
| RBM45    | RNA-binding prote    | 0 | -0.08389 | -0.05786 | -0.09269 | -0.03483 | 0.922931 |
| RPS3A    | 40S ribosomal pro    | 0 | -0.01016 | 0.114773 | 0.080376 | -0.0344  | 0.923853 |
| EIF4A3   | Eukaryotic initiatic | 0 | -0.01287 | 0.013077 | -0.0207  | -0.03378 | 0.925175 |
| DDX3X    | ATP-dependent RN     | 0 | -0.05339 | -0.02983 | -0.06348 | -0.03365 | 0.925445 |
| RAB11A   | Ras-related protein  | 0 | -0.02931 | 0.002338 | -0.03128 | -0.03362 | 0.925513 |
| RPL34    | 60S ribosomal pro    | 0 | 0.228021 | 0.136676 | 0.103216 | -0.03346 | 0.925848 |
| TRIM28   | Transcription inter  | 0 | -0.04218 | -0.01011 | -0.04318 | -0.03308 | 0.926666 |
| DDX5     | Probable ATP-depe    | 0 | 0.037028 | -0.00758 | -0.04025 | -0.03267 | 0.927528 |
| DSC1     | Desmocollin-1        | 0 | -0.01678 | 0.048096 | 0.015813 | -0.03228 | 0.928363 |
| TRPS1    | Zinc finger transcri | 0 | -0.07957 | -0.01171 | -0.04384 | -0.03213 | 0.92869  |
| TCF25    | Transcription factc  | 0 | 0.057735 | 0.005332 | -0.02642 | -0.03175 | 0.929501 |
| PCBP1    | Poly(rC)-binding pr  | 0 | 0.086352 | 0.083763 | 0.052088 | -0.03168 | 0.929661 |
| LLGL2    | Lethal(2) giant larv | 0 | 0.13141  | 0.040117 | 0.009189 | -0.03093 | 0.931263 |
| MRPL3    | 39S ribosomal pro    | 0 | -0.08492 | -0.04081 | -0.07109 | -0.03028 | 0.932646 |
| CABIN1   | Calcineurin bindin   | 0 | -0.04072 | -0.0221  | -0.05234 | -0.03024 | 0.932729 |
| XPO5     | Exportin-5           | 0 | 0.051533 | -0.04372 | -0.07341 | -0.02969 | 0.933919 |
| PIP      | Prolactin-inducibl   | 0 | 0.180115 | 0.104032 | 0.074974 | -0.02906 | 0.93528  |
| SYNE2    | Nesprin-2            | 0 | 0.105767 | 0.055997 | 0.027079 | -0.02892 | 0.935582 |
| RRBP1    | Ribosome-binding     | 0 | 0.028215 | -0.00668 | -0.03494 | -0.02825 | 0.937012 |
| MYBBP1A  | Myb-binding prote    | 0 | 0.011629 | 0.034653 | 0.007413 | -0.02724 | 0.939203 |

|          |                      |   |          |          |          |          |          |
|----------|----------------------|---|----------|----------|----------|----------|----------|
| KIAA1109 | Uncharacterized pr   | 0 | 0.009694 | 0.017174 | -0.00998 | -0.02715 | 0.939393 |
| HNRNPA3  | Heterogeneous nuc    | 0 | -0.05329 | -0.04458 | -0.07063 | -0.02605 | 0.941779 |
| CAPRIN1  | Caprin-1             | 0 | 0.125468 | 0.062783 | 0.037314 | -0.02547 | 0.94304  |
| ZNF638   | Zinc finger protein  | 0 | -0.03179 | -0.01529 | -0.04061 | -0.02533 | 0.943346 |
| SNRNP40  | U5 small nuclear ri  | 0 | 0.130638 | 0.0381   | 0.013433 | -0.02467 | 0.944784 |
| CHD1L    | Chromodomain-he      | 0 | -0.11621 | 0.000779 | -0.02372 | -0.0245  | 0.945156 |
| POLR2I   | DNA-directed RNA     | 0 | 0.102217 | 0.127982 | 0.103996 | -0.02399 | 0.946269 |
| SON      | Protein SON          | 0 | 0.003392 | -0.01585 | -0.03961 | -0.02376 | 0.946765 |
| NOA1     | Nitric oxide-associ  | 0 | 0.088413 | 0.083682 | 0.060066 | -0.02362 | 0.947074 |
| ESRRA    | Steroid hormone r    | 0 | 0.269924 | 0.075269 | 0.052408 | -0.02286 | 0.948721 |
| ZC3H8    | Zinc finger CCCH d   | 0 | -0.04949 | -0.0629  | -0.08542 | -0.02252 | 0.949464 |
| SSR4     | Translocon-associa   | 0 | 0.111069 | 0.144357 | 0.121899 | -0.02246 | 0.949602 |
| RPL6     | 60S ribosomal pro    | 0 | 0.111977 | 0.032147 | 0.010914 | -0.02123 | 0.952285 |
| DYNC2H1  | Cytoplasmic dynei    | 0 | 0.047426 | -0.04434 | -0.06499 | -0.02065 | 0.953562 |
| TOP1     | DNA topoisomeras     | 0 | -0.03847 | -0.01257 | -0.03249 | -0.01992 | 0.955164 |
| RPS14    | 40S ribosomal pro    | 0 | 0.576782 | 0.450672 | 0.43082  | -0.01985 | 0.955317 |
| SEC24A   | Protein transport p  | 0 | -0.03939 | 0.029817 | 0.010779 | -0.01904 | 0.95711  |
| TACC3    | Transforming acidi   | 0 | -0.04215 | 0.02113  | 0.00226  | -0.01887 | 0.957479 |
| null     | Trypsin              | 0 | 0.006133 | -0.04878 | -0.06759 | -0.01881 | 0.957621 |
| ZC3H4    | Zinc finger CCCH d   | 0 | 0.03945  | 0.142247 | 0.123626 | -0.01862 | 0.958028 |
| SAFB     | SAFB protein         | 0 | 0.071707 | 0.022466 | 0.004839 | -0.01763 | 0.960224 |
| RPL8     | 60S ribosomal pro    | 0 | 0.026407 | 0.069237 | 0.052467 | -0.01677 | 0.962122 |
| CHD4     | Chromodomain-he      | 0 | 0.173044 | 0.293778 | 0.277424 | -0.01635 | 0.963044 |
| LARP4    | La ribonucleoprote   | 0 | -0.04177 | 0.014375 | -0.00161 | -0.01599 | 0.963858 |
| DDX17    | Probable ATP-depe    | 0 | -0.0175  | -0.01593 | -0.03082 | -0.01489 | 0.96629  |
| HNRNPA2B | Heterogeneous nuc    | 0 | -0.02691 | -0.03194 | -0.04481 | -0.01287 | 0.9708   |
| SMC4     | Structural mainter   | 0 | -0.01766 | 0.075057 | 0.062228 | -0.01283 | 0.970891 |
| SF3B4    | Splicing factor 3B s | 0 | -0.05702 | -0.11736 | -0.13014 | -0.01279 | 0.97099  |
| RPL15    | Ribosomal protein    | 0 | 0.060372 | 0.037044 | 0.024286 | -0.01276 | 0.971052 |
| RUVBL1   | RuvB-like 1          | 0 | -0.11992 | -0.0502  | -0.0626  | -0.01241 | 0.971837 |
| HNRNPL   | Heterogeneous nuc    | 0 | 0.00408  | -0.02833 | -0.0402  | -0.01187 | 0.973028 |
| MRPS27   | 28S ribosomal pro    | 0 | -0.01039 | 0.088357 | 0.076524 | -0.01183 | 0.97312  |
| COPG1    | Coatomer subunit     | 0 | 0.002274 | -0.02072 | -0.03247 | -0.01175 | 0.9733   |
| KHSRP    | Far upstream elem    | 0 | -0.00085 | -0.0002  | -0.01155 | -0.01135 | 0.974208 |
| CAD      | DNA fragmentatio     | 0 | -0.03421 | -0.00652 | -0.01776 | -0.01124 | 0.974449 |
| UPF1     | Regulator of nonse   | 0 | 0.058983 | 0.011614 | 0.000653 | -0.01096 | 0.975077 |
| COX6C    | Cytochrome c oxid    | 0 | -0.02122 | -0.01863 | -0.02943 | -0.0108  | 0.975431 |
| DNAJA1   | DnaJ homolog sub     | 0 | -0.10564 | -0.115   | -0.1258  | -0.0108  | 0.975438 |
| AP2A1    | AP-2 complex subu    | 0 | 0.030998 | 0.048048 | 0.037353 | -0.0107  | 0.975674 |
| PRRC2A   | Protein PRRC2A       | 0 | -0.02167 | -0.01484 | -0.02521 | -0.01037 | 0.976408 |
| HNRNPK   | Isoform 3 of Heterc  | 0 | 0.005737 | 0.014129 | 0.003921 | -0.01021 | 0.976769 |
| MTDH     | Protein LYRIC        | 0 | 0.071615 | -0.0269  | -0.03538 | -0.00848 | 0.980663 |
| SS18     | Protein SSXT         | 0 | -0.0048  | -0.02343 | -0.03187 | -0.00844 | 0.980764 |
| TJP2     | Tight junction prot  | 0 | -0.04132 | 0.001949 | -0.0059  | -0.00785 | 0.982079 |
| PURB     | Transcriptional act  | 0 | 0.08791  | 0.03869  | 0.030937 | -0.00775 | 0.982306 |
| USP7     | Ubiquitin carboxyl   | 0 | -0.02788 | 0.041107 | 0.033544 | -0.00756 | 0.982735 |
| CTNNA1   | Catenin alpha-1 (Fr  | 0 | 0.194495 | 0.163842 | 0.157076 | -0.00677 | 0.984541 |
| CARM1    | Histone-arginine m   | 0 | -0.03191 | -0.0498  | -0.05525 | -0.00545 | 0.987533 |
| RPL30    | 60S ribosomal pro    | 0 | -0.04351 | 0.03977  | 0.034366 | -0.0054  | 0.987634 |
| PRRC2C   | Protein PRRC2C       | 0 | -0.05219 | -0.03967 | -0.04487 | -0.0052  | 0.988093 |
| MCM3     | DNA replication lic  | 0 | -0.00331 | 0.068172 | 0.063046 | -0.00513 | 0.988268 |
| MYL6     | Myosin light polyp   | 0 | 0.218193 | 0.186331 | 0.181619 | -0.00471 | 0.989209 |

|          |                                           |   |          |          |          |          |          |
|----------|-------------------------------------------|---|----------|----------|----------|----------|----------|
| NOMO3    | Nodal modulator 3                         | 0 | -0.0648  | -0.04656 | -0.05098 | -0.00442 | 0.989876 |
| ILF2     | Interleukin enhanc                        | 0 | -0.01049 | -0.09558 | -0.09991 | -0.00433 | 0.990077 |
| RAB10    | Ras-related proteir                       | 0 | -0.06285 | -0.02631 | -0.03041 | -0.0041  | 0.9906   |
| KIAA1967 | Isoform 2 of DBIRD                        | 0 | -0.05149 | -0.016   | -0.01986 | -0.00386 | 0.991152 |
| EIF2S3   | Eukaryotic translat                       | 0 | 0.01027  | -0.01092 | -0.01457 | -0.00365 | 0.99163  |
| HIST1H1D | Histone H1.3                              | 0 | 0.053794 | -0.05783 | -0.06144 | -0.00361 | 0.991717 |
| SPATS2L  | SPATS2-like proteir                       | 0 | 0.0178   | -0.0394  | -0.04273 | -0.00333 | 0.992367 |
| TEX10    | Testis-expressed se                       | 0 | 0.082643 | 0.01408  | 0.011691 | -0.00239 | 0.994514 |
| POFUT2   | GDP-fucose proteir                        | 0 | -0.13228 | 0.048187 | 0.04617  | -0.00202 | 0.995367 |
| SF3B1    | Splicing factor 3B s                      | 0 | -0.00832 | 0.024644 | 0.023041 | -0.0016  | 0.996314 |
| HNRNPH1  | Heterogeneous nuc                         | 0 | -0.06279 | -0.07794 | -0.07844 | -0.0005  | 0.99885  |
| RPS8     | 40S ribosomal proi                        | 0 | -0.13757 | 0.034461 | 0.034098 | -0.00036 | 0.999164 |
| ILF3     | Interleukin enhanc                        | 0 | -0.0075  | -0.03722 | -0.03757 | -0.00034 | 0.999206 |
| RBM27    | RNA-binding prote                         | 0 | 0.037433 | -0.03037 | -0.03064 | -0.00027 | 0.999384 |
| GRSF1    | G-rich sequence fa                        | 0 | -0.09202 | -0.03569 | -0.03583 | -0.00014 | 0.999675 |
| MAP4     | Isoform 5 of Microtubule-associated prote | 0 |          | 0        | 0        | 0        | 1        |
| PSMA2    | Proteasome subunit alpha type             | 0 |          | 0        | 0        | 0        | 1        |
| S100A13  | Protein S100-A13                          | 0 | 0        | 0        | 0        | 0        | 1        |
| SEC16A   | Isoform 5 of Protein transport            | 0 |          |          |          | 0        | 1        |
| TBK1     | Serine/threonine-protein kinas            | 0 |          |          | 0        | 0        | 1        |
| TRMT61A  | tRNA (adenine(58)-N(1))-methy             | 0 | 0        | 0        | 0        | 0        | 1        |
| SUPV3L1  | ATP-dependent RN                          | 0 | -0.04367 | 0.035773 | 0.037022 | 0.001249 | 1.002881 |
| ATP5B    | ATP synthase subur                        | 0 | -0.0787  | -0.02677 | -0.02538 | 0.001387 | 1.003199 |
| EIF5B    | Eukaryotic translat                       | 0 | -0.01247 | 0.021395 | 0.023123 | 0.001728 | 1.003988 |
| HSPD1    | 60 kDa heat shock                         | 0 | 0.01691  | -0.07495 | -0.07303 | 0.001926 | 1.004445 |
| SRSF6    | Serine/arginine-ric                       | 0 | -0.02407 | -0.04245 | -0.04045 | 0.001996 | 1.004606 |
| DCTN1    | Dynactin subunit 1                        | 0 | -0.09872 | -0.02533 | -0.02296 | 0.002374 | 1.005481 |
| ZNF326   | DBIRD complex sul                         | 0 | -0.12438 | -0.09981 | -0.09729 | 0.002525 | 1.005831 |
| MRPS34   | 28S ribosomal proi                        | 0 | -0.08139 | -0.01414 | -0.01158 | 0.002565 | 1.005923 |
| RFC1     | Replication factor                        | 0 | -0.08879 | -0.0272  | -0.02446 | 0.00274  | 1.006328 |
| MUC16    | Mucin-16                                  | 0 | -0.08478 | -0.07904 | -0.07615 | 0.002897 | 1.006694 |
| ATP5C1   | ATP synthase subur                        | 0 | 0.067824 | 0.066393 | 0.069584 | 0.003191 | 1.007374 |
| BAG4     | BAG family molecu                         | 0 | 0.007508 | 0.004791 | 0.009249 | 0.004458 | 1.010318 |
| FTSJ3    | pre-rRNA processin                        | 0 | 0.126712 | 0.090801 | 0.095309 | 0.004508 | 1.010434 |
| YTHDC2   | Probable ATP-depe                         | 0 | 0.021253 | 0.046633 | 0.051638 | 0.005006 | 1.011593 |
| WIBG     | Partner of Y14 and                        | 0 | 0.292509 | 0.198174 | 0.203272 | 0.005098 | 1.011807 |
| AKAP8L   | A-kinase anchor pr                        | 0 | -0.01247 | -0.04823 | -0.04296 | 0.005268 | 1.012204 |
| PHB2     | Prohibitin-2                              | 0 | -0.14226 | 0.000909 | 0.006717 | 0.005808 | 1.013463 |
| RPS29    | 40S ribosomal proi                        | 0 | -0.02265 | -0.03823 | -0.03214 | 0.006089 | 1.01412  |
| EPRS     | Bifunctional glutar                       | 0 | -0.1248  | -0.03654 | -0.03042 | 0.006125 | 1.014202 |
| MLL      | MLL cleavage prod                         | 0 | 0.05294  | 0.027869 | 0.034054 | 0.006185 | 1.014343 |
| SCN8A    | Sodium channel pr                         | 0 | 0.059427 | -0.00981 | -0.0033  | 0.006511 | 1.015106 |
| PUM1     | Pumilio homolog 1                         | 0 | 0.06179  | -0.00388 | 0.00316  | 0.007039 | 1.016339 |
| DNAH10   | Dynein heavy chair                        | 0 | 0.124153 | 0.135266 | 0.14301  | 0.007744 | 1.017991 |
| BDP1     | Isoform 8 of Transc                       | 0 | -0.40684 | -0.26557 | -0.25772 | 0.007851 | 1.018243 |
| RPL18    | 60S ribosomal proi                        | 0 | 0.104222 | -0.045   | -0.03714 | 0.007861 | 1.018266 |
| PLEKHM3  | Pleckstrin homolo                         | 0 | 0.05225  | 0.021572 | 0.029544 | 0.007972 | 1.018525 |
| PRPF39   | Pre-mRNA-processi                         | 0 | -0.03336 | -0.04618 | -0.0376  | 0.008585 | 1.019965 |
| CDH1     | Cadherin-1                                | 0 | 0.050773 | 0.009819 | 0.018696 | 0.008877 | 1.02065  |
| RPL26    | 60S ribosomal proi                        | 0 | -0.06207 | -0.02914 | -0.01995 | 0.009195 | 1.021398 |
| PFN1     | Profilin-1                                | 0 | 0.181099 | 0.097786 | 0.107503 | 0.009717 | 1.022625 |
| IGHG1    | Ig gamma-1 chain C                        | 0 | 0.03794  | 0.024189 | 0.033981 | 0.009792 | 1.022803 |

|           |                           |   |          |          |          |          |          |
|-----------|---------------------------|---|----------|----------|----------|----------|----------|
| NSUN2     | NOL1/NOP2/Sun d           | 0 | 0.022792 | 0.109609 | 0.119406 | 0.009797 | 1.022815 |
| RPL36     | 60S ribosomal pro         | 0 | 0.105505 | 0.024476 | 0.034485 | 0.010009 | 1.023314 |
| BIRC6     | Baculoviral IAP rep       | 0 | 0.102411 | 0.021587 | 0.03208  | 0.010493 | 1.024455 |
| EIF3I     | Eukaryotic translat       | 0 | -0.00206 | 0.025856 | 0.03645  | 0.010595 | 1.024695 |
| SMCHD1    | Structural mainter        | 0 | 0.047882 | -0.0129  | -0.00112 | 0.011779 | 1.027494 |
| RBM6      | RNA-binding prote         | 0 | -0.00285 | -0.03614 | -0.02343 | 0.012703 | 1.029681 |
| GAPDH     | Glyceraldehyde-3- $\beta$ | 0 | -0.00313 | 0.032335 | 0.045325 | 0.012991 | 1.030364 |
| EIF3A     | Eukaryotic translat       | 0 | 0.025729 | 0.035895 | 0.049069 | 0.013174 | 1.030799 |
| SYNCRIP   | Isoform 3 of Heterc       | 0 | 0.084363 | 0.034272 | 0.047601 | 0.013329 | 1.031167 |
| ALB       | Serum albumin             | 0 | -0.0071  | -0.02917 | -0.01479 | 0.014385 | 1.033677 |
| PABPC1    | Polyadenylate-bin         | 0 | -0.03797 | -0.02752 | -0.01246 | 0.015063 | 1.035292 |
| H1FX      | Histone H1x               | 0 | 0.055027 | 0.026457 | 0.041876 | 0.01542  | 1.036143 |
| TFG       | Protein TFG               | 0 | -0.02614 | -0.02909 | -0.0133  | 0.01579  | 1.037026 |
| CDC5L     | Cell division cycle!      | 0 | -0.02698 | -0.04315 | -0.02734 | 0.015813 | 1.037082 |
| HNRNPH2   | Heterogeneous nuc         | 0 | -0.11367 | -0.09557 | -0.07944 | 0.016131 | 1.037842 |
| CANX      | Calnexin                  | 0 | -0.03938 | -0.07263 | -0.0563  | 0.016333 | 1.038323 |
| FAM120A   | Constitutive coacti       | 0 | -0.00282 | 0.014564 | 0.031581 | 0.017017 | 1.03996  |
| KRI1      | Protein KRI1 homc         | 0 | 0.016893 | 0.019272 | 0.03741  | 0.018138 | 1.042649 |
| DSP       | Desmoplakin               | 0 | -0.03101 | -0.07277 | -0.05363 | 0.019135 | 1.045045 |
| TRIM56    | E3 ubiquitin-prote        | 0 | 0.043647 | 0.014554 | 0.034075 | 0.019522 | 1.045976 |
| SKIV2L2   | Superkiller viralici      | 0 | -0.11956 | -0.03773 | -0.01757 | 0.020157 | 1.047508 |
| ATP5A1    | ATP synthase subur        | 0 | 0.005666 | -0.05612 | -0.03527 | 0.020852 | 1.049184 |
| MATR3     | Matrin-3                  | 0 | 0.020359 | -0.01196 | 0.010121 | 0.022083 | 1.052162 |
| C14orf166 | UPF0568 protein C         | 0 | 0.360081 | 0.076552 | 0.098747 | 0.022195 | 1.052434 |
| SFPQ      | Splicing factor           | 0 | 0.039284 | 0.014049 | 0.036571 | 0.022522 | 1.053227 |
| HSP90AB1  | Heat shock protein        | 0 | -0.0011  | -0.03168 | -0.00913 | 0.022547 | 1.053288 |
| UBAP2L    | Ubiquitin-associat        | 0 | -0.099   | -0.04817 | -0.02537 | 0.022802 | 1.053906 |
| RPL13     | 60S ribosomal pro         | 0 | -0.01389 | 0.028417 | 0.051689 | 0.023272 | 1.055047 |
| ASCC3     | Activating signal cc      | 0 | -0.0364  | -0.06383 | -0.04051 | 0.023324 | 1.055173 |
| KHDRBS1   | KH domain-contair         | 0 | 0.048229 | -0.00115 | 0.022238 | 0.023388 | 1.055329 |
| NPM1      | Nucleophosmin             | 0 | -0.02712 | -0.0862  | -0.06259 | 0.023608 | 1.055865 |
| IGLC2     | Ig lambda-2 chain (       | 0 | 0.091976 | 0.042714 | 0.066742 | 0.024028 | 1.056885 |
| LUC7L2    | Putative RNA-bindi        | 0 | 0.114074 | 0.050988 | 0.075312 | 0.024324 | 1.057607 |
| ESR1      | Estrogen receptor         | 0 | -0.05333 | -0.08488 | -0.06042 | 0.02446  | 1.057938 |
| KIF20B    | Isoform 4 of Kinesi       | 0 | 0.051952 | -0.00515 | 0.019723 | 0.024876 | 1.058951 |
| RPS26     | 40S ribosomal pro         | 0 | 0.116201 | 0.096727 | 0.121623 | 0.024897 | 1.059002 |
| RPL37A    | 60S ribosomal pro         | 0 | 0.21231  | -0.11664 | -0.09134 | 0.025299 | 1.059984 |
| DHX8      | ATP-dependent RN          | 0 | -0.04892 | 0.04385  | 0.069332 | 0.025481 | 1.060428 |
| FLNC      | Filamin-C                 | 0 | 0.054202 | 0.202452 | 0.228226 | 0.025774 | 1.061144 |
| PPP2R2A   | Serine/threonine-p        | 0 | 0.021209 | 0.027745 | 0.054004 | 0.026259 | 1.062329 |
| ZCCHC8    | Zinc finger CCHC d        | 0 | -0.08627 | -0.04631 | -0.02    | 0.026314 | 1.062462 |
| ACTL6A    | Actin-like protein        | 0 | -0.14872 | -0.14547 | -0.11817 | 0.0273   | 1.064877 |
| TJP1      | Tight junction prot       | 0 | -0.0048  | -0.0517  | -0.02376 | 0.027941 | 1.066451 |
| RC3H1     | Roquin-1                  | 0 | 0.005431 | -0.09547 | -0.06702 | 0.028444 | 1.067686 |
| HNRNPUL1  | Heterogeneous nuc         | 0 | -0.02549 | -0.04784 | -0.01835 | 0.02949  | 1.070261 |
| TIAL1     | Isoform 2 of Nucle        | 0 | 0.016478 | -0.03564 | -0.00548 | 0.030164 | 1.071924 |
| DDX1      | ATP-dependent RN          | 0 | 0.023016 | -0.03313 | -0.00234 | 0.030782 | 1.073451 |
| SMARCC2   | SWI/SNF complex s         | 0 | 0.054395 | -0.02196 | 0.008874 | 0.030831 | 1.073573 |
| DHX9      | ATP-dependent RN          | 0 | -0.0603  | -0.03323 | -0.00233 | 0.030896 | 1.073731 |
| ELAVL1    | ELAV-like protein 1       | 0 | 0.040367 | -0.0133  | 0.018593 | 0.031897 | 1.076209 |
| XIRP2     | Xin actin-binding r       | 0 | -0.02109 | 0.015857 | 0.048124 | 0.032267 | 1.077127 |
| SLC1A5    | Neutral amino acid        | 0 | -0.14272 | -0.07876 | -0.04644 | 0.032318 | 1.077254 |



|          |                     |   |          |          |          |          |          |
|----------|---------------------|---|----------|----------|----------|----------|----------|
| RBMX     | RNA-binding motif   | 0 | -0.00886 | -0.03652 | -0.00418 | 0.032337 | 1.0773   |
| SCYL1    | N-terminal kinase-l | 0 | -0.00459 | 0.048471 | 0.081015 | 0.032544 | 1.077813 |
| SEC24C   | Protein transport p | 0 | 0.013524 | 0.019302 | 0.052113 | 0.032811 | 1.078476 |
| GNB2L1   | Guanine nucleotid   | 0 | -0.04341 | 0.065276 | 0.098116 | 0.03284  | 1.078551 |
| DCD      | Dermcidin           | 0 | -0.15333 | -0.1902  | -0.15715 | 0.033051 | 1.079075 |
| AZGP1    | Zinc-alpha-2-glyco  | 0 | -0.03412 | 0.040273 | 0.073555 | 0.033282 | 1.079647 |
| HSPB1    | Heat shock protein  | 0 | -0.01257 | -0.05728 | -0.02377 | 0.033517 | 1.080233 |
| AP3D1    | AP-3 complex subu   | 0 | 0.039623 | 0.006415 | 0.040394 | 0.033979 | 1.081383 |
| SNRPB2   | U2 small nuclear ri | 0 | 0.0162   | -0.0666  | -0.03151 | 0.035084 | 1.084137 |
| LSM12    | Protein LSM12 hor   | 0 | -0.02528 | 0.053934 | 0.089336 | 0.035401 | 1.084929 |
| EMG1     | Ribosomal RNA sm    | 0 | -0.05556 | 0.019687 | 0.055127 | 0.03544  | 1.085025 |
| AKAP8    | A-kinase anchor pr  | 0 | 0.010943 | -0.05958 | -0.02388 | 0.035702 | 1.08568  |
| SRPK2    | SRSF protein kinase | 0 | 0.112795 | 0.07188  | 0.107869 | 0.035989 | 1.086397 |
| FAM120C  | Constitutive coacti | 0 | -0.02758 | 0.044863 | 0.081164 | 0.036301 | 1.087178 |
| CCT4     | T-complex protein   | 0 | -0.04308 | -0.00064 | 0.03719  | 0.037828 | 1.091008 |
| PHAX     | Phosphorylated ad   | 0 | 0.07171  | -0.06452 | -0.0264  | 0.038119 | 1.091741 |
| HNRNPD   | Heterogeneous nuc   | 0 | -0.06705 | -0.0321  | 0.006993 | 0.03909  | 1.094182 |
| RPS9     | 40S ribosomal pro   | 0 | 0.041003 | -0.06104 | -0.02177 | 0.039266 | 1.094627 |
| IMMT     | Mitochondrial inn   | 0 | 0.013723 | -0.05732 | -0.0178  | 0.039526 | 1.095283 |
| CSE1L    | Exportin-2          | 0 | 0.022959 | 0.099999 | 0.139551 | 0.039552 | 1.095347 |
| COPB2    | Coatomer protein    | 0 | 0.005861 | -0.03067 | 0.009071 | 0.039742 | 1.095827 |
| HNRNPDL  | Heterogeneous nuc   | 0 | -0.10277 | -0.03349 | 0.006288 | 0.039778 | 1.095918 |
| MRPS9    | 28S ribosomal pro   | 0 | 0.157329 | 0.004073 | 0.044632 | 0.040559 | 1.09789  |
| SMARCA4  | Transcription activ | 0 | -0.05956 | -0.07072 | -0.0301  | 0.04062  | 1.098044 |
| HNRPLL   | Heterogeneous nuc   | 0 | -0.12623 | -0.06483 | -0.02373 | 0.041108 | 1.09928  |
| PHF2     | Lysine-specific der | 0 | 0.086959 | -0.02726 | 0.013958 | 0.041223 | 1.099571 |
| SNRPA    | U1 small nuclear ri | 0 | -0.04763 | 0.052259 | 0.093922 | 0.041663 | 1.100685 |
| PSMD12   | 26S proteasome nc   | 0 | -0.08808 | -0.01365 | 0.028636 | 0.04229  | 1.102275 |
| NOP2     | Putative ribosomal  | 0 | 0.031426 | -0.07151 | -0.02922 | 0.042298 | 1.102296 |
| PSMC4    | 26S protease regul  | 0 | 0.025338 | -0.04154 | 0.001234 | 0.042776 | 1.103509 |
| DSG1     | Desmoglein-1        | 0 | 0.044786 | 0.103292 | 0.146461 | 0.043169 | 1.104508 |
| CTNND1   | Catenin delta-1     | 0 | -0.03919 | 0.003494 | 0.047468 | 0.043975 | 1.106559 |
| PTBP1    | Polypyrimidine tra  | 0 | -0.04101 | -0.01558 | 0.029003 | 0.04458  | 1.108102 |
| MRPS35   | 28S ribosomal pro   | 0 | 0.009742 | -0.02659 | 0.019206 | 0.045798 | 1.111215 |
| CROCC    | Rootletin (Fragmer  | 0 | 0.041249 | -0.05511 | -0.00928 | 0.045837 | 1.111315 |
| XPO1     | Exportin-1          | 0 | -0.09643 | -0.0669  | -0.02102 | 0.045877 | 1.111418 |
| DHX29    | ATP-dependent RN    | 0 | 0.108846 | 0.023584 | 0.069651 | 0.046067 | 1.111903 |
| PKM      | Pyruvate kinase (Fr | 0 | 0.070241 | 0.003327 | 0.049598 | 0.046271 | 1.112424 |
| ACTG1    | Actin               | 0 | 0.012406 | -0.07402 | -0.02762 | 0.046396 | 1.112745 |
| ITPR3    | Inositol 1          | 0 | -0.10659 | -0.1636  | -0.11689 | 0.04671  | 1.113551 |
| TUBB3    | Tubulin beta-3 cha  | 0 | 0.082663 | -0.0218  | 0.025135 | 0.046935 | 1.114128 |
| PRKDC    | DNA-dependent pr    | 0 | 0.022386 | -0.06437 | -0.01708 | 0.047297 | 1.115057 |
| SLC17A5  | Sialin              | 0 | -0.06947 | -0.0504  | -0.00307 | 0.047334 | 1.115152 |
| TCEB1    | Transcription elon  | 0 | 0.169718 | -0.03443 | 0.013555 | 0.047981 | 1.116815 |
| HSD17B10 | 3-hydroxyacyl-CoA   | 0 | 0.205728 | 0.210576 | 0.260204 | 0.049628 | 1.121057 |
| SMARCA2  | Probable global tra | 0 | -0.1101  | -0.10289 | -0.0528  | 0.050098 | 1.122271 |
| FASTKD2  | FAST kinase domain  | 0 | -0.03308 | -0.04754 | 0.00285  | 0.050386 | 1.123016 |
| TRIP12   | Isoform 2 of E3 ubi | 0 | -0.08951 | -0.16522 | -0.1128  | 0.052419 | 1.128286 |
| AGO2     | Protein argonau     | 0 | 0.006318 | -0.04073 | 0.011716 | 0.052443 | 1.128348 |
| RAB2A    | Ras-related protei  | 0 | 0.052938 | -0.01045 | 0.04248  | 0.052933 | 1.129622 |
| PPP1CA   | Serine/threonine-p  | 0 | 0.12467  | -0.35225 | -0.29794 | 0.054316 | 1.133224 |
| IPO4     | Importin-4          | 0 | 0.047861 | -0.02737 | 0.02776  | 0.055131 | 1.135352 |

|          |                      |   |          |          |          |          |          |
|----------|----------------------|---|----------|----------|----------|----------|----------|
| HSP90AA1 | Heat shock protein   | 0 | -0.03991 | -0.01767 | 0.037701 | 0.055376 | 1.135993 |
| RBM14    | RNA-binding prote    | 0 | -0.08125 | -0.14457 | -0.08786 | 0.056716 | 1.139505 |
| RALY     | RNA-binding prote    | 0 | 0.100353 | 0.035333 | 0.092427 | 0.057093 | 1.140495 |
| CASC3    | Protein CASC3        | 0 | -0.03611 | -0.0158  | 0.041654 | 0.057457 | 1.141449 |
| MRPS5    | 28S ribosomal pro    | 0 | 0.053686 | 0.021355 | 0.079181 | 0.057826 | 1.14242  |
| COPB1    | Coatomer subunit     | 0 | 0.017338 | -0.04829 | 0.00976  | 0.05805  | 1.143009 |
| FAU      | 40S ribosomal pro    | 0 | 0.006561 | 0.111292 | 0.169908 | 0.058616 | 1.144502 |
| RBM10    | RNA-binding prote    | 0 | 0.038383 | 0.005084 | 0.064055 | 0.058971 | 1.145438 |
| HEATR6   | HEAT repeat-contai   | 0 | -0.01541 | 0.008204 | 0.067679 | 0.059475 | 1.146766 |
| ITCH     | E3 ubiquitin-prote   | 0 | 0.032409 | -0.01219 | 0.04857  | 0.060756 | 1.150154 |
| TUBB4B   | Tubulin beta-4B ch   | 0 | -0.02214 | -0.0534  | 0.008104 | 0.061502 | 1.152132 |
| EFTUD2   | 116 kDa U5 small r   | 0 | -0.03531 | -0.02013 | 0.041522 | 0.061655 | 1.152537 |
| TSR1     | Pre-rRNA-processir   | 0 | 0.049013 | 0.017953 | 0.08     | 0.062047 | 1.153579 |
| HSPH1    | Heat shock protein   | 0 | -0.05933 | -0.04122 | 0.021214 | 0.06243  | 1.154595 |
| WDR6     | WD repeat-contair    | 0 | 0.010255 | -0.01929 | 0.043565 | 0.062853 | 1.155722 |
| TRMT112  | tRNA methyltransfi   | 0 | -0.00351 | 0.027625 | 0.091004 | 0.063379 | 1.157123 |
| PCNT     | Pericentrin          | 0 | -0.10967 | 0.012196 | 0.076366 | 0.064171 | 1.159233 |
| SART1    | U4/U6.U5 tri-snRN    | 0 | 0.00342  | -0.05202 | 0.012199 | 0.064218 | 1.15936  |
| PTCD3    | Pentatricopeptide    | 0 | -0.06847 | -0.10412 | -0.03981 | 0.064311 | 1.159608 |
| XRCC5    | X-ray repair cross-c | 0 | 0.152795 | 0.076277 | 0.140808 | 0.064532 | 1.160197 |
| ANKRD28  | Serine/threonine-p   | 0 | 0.139819 | 0.064535 | 0.129238 | 0.064703 | 1.160654 |
| TUBA1B   | Tubulin alpha-1B c   | 0 | -0.06936 | -0.05849 | 0.006868 | 0.065361 | 1.162416 |
| TAX1BP1  | Isoform 2 of Tax1-b  | 0 | 0.06719  | 0.002117 | 0.06754  | 0.065423 | 1.16258  |
| HNRNPUL2 | Heterogeneous nuc    | 0 | -0.00784 | -0.0208  | 0.046993 | 0.067791 | 1.168937 |
| HNRNPA1  | Heterogeneous nuc    | 0 | 0.018039 | -0.02448 | 0.0434   | 0.067884 | 1.169186 |
| RPL37    | 60S ribosomal pro    | 0 | 0.056767 | 0.109666 | 0.177662 | 0.067996 | 1.169489 |
| DDX27    | Probable ATP-depe    | 0 | 0.109118 | 0.027147 | 0.095398 | 0.068252 | 1.170177 |
| MYO1B    | Unconventional m     | 0 | -0.02512 | -0.03354 | 0.034751 | 0.06829  | 1.17028  |
| HNRNPAB  | Heterogeneous nuc    | 0 | 0.044244 | 0.01412  | 0.082751 | 0.06863  | 1.171198 |
| APC      | Adenomatous poly     | 0 | -0.00367 | -0.01251 | 0.056527 | 0.069036 | 1.172293 |
| SS18L1   | Calcium-responsiv    | 0 | 0.06741  | -0.01582 | 0.053548 | 0.069371 | 1.173198 |
| TRNAU1AP | tRNA selenocysteir   | 0 | -0.05451 | -0.15823 | -0.0888  | 0.069422 | 1.173335 |
| CSTA     | Cystatin-A           | 0 | -0.06812 | -0.21089 | -0.14146 | 0.069426 | 1.173347 |
| MARS     | Methionine--tRNA     | 0 | -0.04406 | -0.03018 | 0.039871 | 0.070048 | 1.175027 |
| GEMIN5   | Gem-associated pr    | 0 | 0.01194  | -0.00209 | 0.068007 | 0.070099 | 1.175165 |
| SNX9     | Sorting nexin-9      | 0 | -0.02532 | -0.05316 | 0.018085 | 0.071243 | 1.178265 |
| RPL5     | 60S ribosomal pro    | 0 | -0.017   | -0.05527 | 0.01652  | 0.071791 | 1.179753 |
| PPP6R3   | Serine/threonine-p   | 0 | 0.069928 | 0.034411 | 0.106491 | 0.07208  | 1.180539 |
| HGS      | Hepatocyte growt     | 0 | 0.074333 | -0.03098 | 0.041496 | 0.072477 | 1.181617 |
| HNRNPC   | Heterogeneous nuc    | 0 | 0.081636 | 0.030527 | 0.103957 | 0.07343  | 1.184213 |
| PRPF8    | Pre-mRNA-processi    | 0 | -0.07278 | -0.09917 | -0.02503 | 0.074138 | 1.186145 |
| SEC23A   | Protein transport p  | 0 | 0.008149 | -0.00277 | 0.072855 | 0.075623 | 1.190209 |
| NUFIP2   | Nuclear fragile X m  | 0 | 0.006681 | -0.0226  | 0.054048 | 0.076653 | 1.193033 |
| UHRF1    | E3 ubiquitin-prote   | 0 | 0.030115 | 0.02689  | 0.103728 | 0.076838 | 1.193542 |
| ZC3HAV1  | Zinc finger CCCH-ty  | 0 | 0.023649 | -0.01777 | 0.059244 | 0.077017 | 1.194036 |
| EPB41L5  | Isoform 2 of Band 4  | 0 | 0.113177 | -0.02285 | 0.054491 | 0.077339 | 1.194919 |
| HUWE1    | E3 ubiquitin-prote   | 0 | -0.00616 | -0.03723 | 0.040138 | 0.077369 | 1.195002 |
| XRN2     | 5'-3' exoribonuclea  | 0 | 0.018199 | -0.01777 | 0.060069 | 0.077837 | 1.196293 |
| EIF3H    | Eukaryotic translat  | 0 | 0.00883  | 0.025316 | 0.103296 | 0.07798  | 1.196685 |
| PLOD1    | Procollagen-lysine   | 0 | 0.157332 | -0.09993 | -0.02182 | 0.078109 | 1.197041 |
| DNMT3A   | DNA (cytosine-5)-m   | 0 | 0.067367 | -0.07222 | 0.005913 | 0.07813  | 1.197099 |
| MRPS31   | 28S ribosomal pro    | 0 | 0.148479 | -0.03857 | 0.039566 | 0.078139 | 1.197125 |

|          |                      |   |          |          |          |          |          |
|----------|----------------------|---|----------|----------|----------|----------|----------|
| AGAP5    | Arf-GAP with GTPa    | 0 | -0.12557 | -0.07719 | 0.001197 | 0.078391 | 1.197818 |
| MCM6     | DNA replication lic  | 0 | -0.05764 | -0.04557 | 0.034472 | 0.080043 | 1.202385 |
| CSNK1A1  | Casein kinase I iso  | 0 | -0.08743 | -0.02562 | 0.056148 | 0.081765 | 1.20716  |
| LARP1    | La-related protein   | 0 | 0.023186 | 0.007532 | 0.090789 | 0.083256 | 1.211313 |
| KIF2A    | Kinesin-like protei  | 0 | 0.046995 | -0.05544 | 0.028384 | 0.08382  | 1.212887 |
| PIGR     | Polymeric immunc     | 0 | 0.042364 | 0.057068 | 0.14129  | 0.084221 | 1.214007 |
| SRPK1    | SFRS protein kinas   | 0 | 0.109851 | -0.02768 | 0.056788 | 0.084466 | 1.214692 |
| TRUB2    | Probable tRNA pse    | 0 | -0.15621 | -0.10968 | -0.02441 | 0.085273 | 1.21695  |
| C6orf132 | Uncharacterized pr   | 0 | 0.055049 | -0.07263 | 0.012727 | 0.085359 | 1.217193 |
| VCP      | Transitional endop   | 0 | 0.034494 | 0.007032 | 0.09276  | 0.085728 | 1.218225 |
| DDB1     | DNA damage-bindi     | 0 | -0.00708 | -0.00794 | 0.077843 | 0.085786 | 1.218388 |
| MCOLN1   | Mucolipin-1          | 0 | 0.241858 | 0.038473 | 0.124595 | 0.086122 | 1.219332 |
| NONO     | Non-POU domain-c     | 0 | 0.026186 | -0.07298 | 0.01334  | 0.086325 | 1.219901 |
| SNRNP200 | U5 small nuclear ri  | 0 | -0.12439 | -0.08935 | -0.00224 | 0.087112 | 1.222115 |
| MOV10    | Putative helicase N  | 0 | 0.057499 | 0.024457 | 0.111804 | 0.087346 | 1.222774 |
| USP15    | Ubiquitin carboxyl   | 0 | -0.02257 | -0.01661 | 0.073478 | 0.09009  | 1.230523 |
| G3BP1    | Ras GTPase-activati  | 0 | 0.16867  | 0.006982 | 0.097796 | 0.090814 | 1.232578 |
| UBAP2    | Ubiquitin-associati  | 0 | -0.00157 | -0.01534 | 0.076092 | 0.091431 | 1.234331 |
| ATXN2L   | Ataxin-2-like prote  | 0 | 0.004781 | -0.01263 | 0.080938 | 0.093571 | 1.240427 |
| MOGS     | Mannosyl-oligosac    | 0 | 0.105561 | -0.05781 | 0.036442 | 0.094257 | 1.242387 |
| PUF60    | Poly(U)-binding-sp   | 0 | 0.107661 | -0.03136 | 0.063737 | 0.095101 | 1.244805 |
| SEC24D   | Protein transport p  | 0 | 0.041739 | 0.003187 | 0.098541 | 0.095354 | 1.245529 |
| SEC24B   | Protein transport p  | 0 | -0.07803 | -0.03093 | 0.064464 | 0.095393 | 1.245641 |
| FASN     | Fatty acid synthase  | 0 | -0.08046 | -0.02658 | 0.069029 | 0.095613 | 1.246273 |
| NPEPPS   | Puromycin-sensitiv   | 0 | 0.103918 | 0.023407 | 0.119083 | 0.095676 | 1.246454 |
| CAND1    | Cullin-associated N  | 0 | -0.07488 | -0.07828 | 0.020627 | 0.098904 | 1.255753 |
| CHERP    | Calcium homeosta     | 0 | -0.08606 | -0.04073 | 0.058398 | 0.099132 | 1.256412 |
| PRPF6    | Pre-mRNA-processi    | 0 | -0.14311 | 0.083093 | 0.183145 | 0.100052 | 1.259075 |
| TRAP1    | Heat shock protein   | 0 | 0.007801 | -0.02396 | 0.07668  | 0.100637 | 1.260774 |
| SAFB2    | Scaffold attachmer   | 0 | -0.04843 | -0.05519 | 0.046265 | 0.101451 | 1.26314  |
| PSMG4    | HCG22882             | 0 | -0.06966 | -0.09971 | 0.002891 | 0.102602 | 1.266492 |
| CELF1    | CUGBP Elav-like far  | 0 | 0.10098  | 0.013763 | 0.116385 | 0.102623 | 1.266551 |
| GOLGB1   | Golgin subfamily B   | 0 | 0.029015 | -0.01761 | 0.085507 | 0.103117 | 1.267993 |
| ILF3     | Interleukin enhanc   | 0 | -0.08165 | -0.15696 | -0.05344 | 0.103529 | 1.269198 |
| LRR47    | Leucine-rich repea   | 0 | 0.123007 | -0.05106 | 0.053172 | 0.104237 | 1.271268 |
| MIA3     | Melanoma inhibitc    | 0 | 0.004672 | -0.05316 | 0.051113 | 0.104272 | 1.271371 |
| SEC16A   | Protein transport p  | 0 | -0.07106 | -0.13804 | -0.02957 | 0.108472 | 1.283724 |
| HIST1H1C | Histone H1.2         | 0 | 0.190558 | 0.093272 | 0.202057 | 0.108784 | 1.284649 |
| CCDC25   | Coiled-coil domain   | 0 | 0.04691  | -0.12886 | -0.0171  | 0.111757 | 1.293471 |
| DICER1   | Endoribonuclease I   | 0 | 0.004565 | 0.021739 | 0.133689 | 0.11195  | 1.294047 |
| RBM25    | RNA-binding prote    | 0 | 0.002938 | -0.02104 | 0.091044 | 0.112086 | 1.294453 |
| CMTR1    | Cap-specific mRNA    | 0 | 0.169363 | 0.029616 | 0.141773 | 0.112156 | 1.294662 |
| USP10    | Ubiquitin carboxyl   | 0 | 0.011516 | -0.00037 | 0.112266 | 0.112633 | 1.296084 |
| MAP3K4   | Mitogen-activated    | 0 | -0.03568 | -0.08181 | 0.031451 | 0.113262 | 1.297961 |
| RPS4Y1   | 40S ribosomal pro    | 0 | 0.049186 | 0.084809 | 0.198597 | 0.113788 | 1.299536 |
| FLII     | Protein flightless-1 | 0 | 0.004192 | -0.02005 | 0.093783 | 0.113831 | 1.299663 |
| FLG      | Filaggrin            | 0 | -0.14313 | -0.08109 | 0.033994 | 0.115085 | 1.303422 |
| FUS      | RNA-binding prote    | 0 | 0.01634  | -0.10297 | 0.012429 | 0.115396 | 1.304355 |
| ARID1A   | AT-rich interactive  | 0 | 0.013129 | -0.10297 | 0.013734 | 0.116703 | 1.308288 |
| SRP14    | Signal recognition   | 0 | 0.581298 | 0.35925  | 0.47603  | 0.11678  | 1.308519 |
| UGGT1    | UDP-glucose:glyco    | 0 | -0.00022 | -0.03386 | 0.084545 | 0.118408 | 1.313435 |
| CCT2     | T-complex protein    | 0 | -0.10469 | -0.20152 | -0.08288 | 0.118637 | 1.314125 |

|           |                      |   |          |          |          |          |          |
|-----------|----------------------|---|----------|----------|----------|----------|----------|
| AP2B1     | AP-2 complex subu    | 0 | 0.035743 | 0.017618 | 0.136926 | 0.119308 | 1.316158 |
| DHX15     | Putative pre-mRNA    | 0 | 0.053191 | -0.04278 | 0.076592 | 0.119368 | 1.316341 |
| NGDN      | Neuroguidin (Fragr   | 0 | -0.04742 | -0.04127 | 0.078462 | 0.119735 | 1.317454 |
| NCBP1     | Nuclear cap-bindir   | 0 | 0.1036   | -0.00682 | 0.113665 | 0.120485 | 1.31973  |
| YBX3      | Y-box-binding prot   | 0 | 0.085436 | -0.03584 | 0.085886 | 0.121726 | 1.323507 |
| IGHA1     | Ig alpha-1 chain C r | 0 | -0.00703 | -0.03801 | 0.084113 | 0.122123 | 1.324715 |
| SEC23B    | Protein transport p  | 0 | 0.012449 | -0.0383  | 0.083911 | 0.122215 | 1.324996 |
| AP2A2     | AP-2 complex subu    | 0 | 0.235233 | 0.168451 | 0.29095  | 0.122499 | 1.325864 |
| CSF2RA    | Isoform 2 of Granu   | 0 | 0.314757 | 0.014123 | 0.14005  | 0.125927 | 1.336372 |
| POP1      | Ribonucleases P/M    | 0 | 0.045311 | 0.00107  | 0.127827 | 0.126758 | 1.338929 |
| FUBP3     | Far upstream elem    | 0 | 0.064181 | -0.05446 | 0.072963 | 0.127426 | 1.340993 |
| DST       | Dystonin             | 0 | -0.09606 | -0.12877 | 0.00215  | 0.130915 | 1.351808 |
| HNRNPA0   | Heterogeneous nuc    | 0 | 0.068681 | -0.02543 | 0.105926 | 0.131359 | 1.35319  |
| ESYT1     | Extended synaptot    | 0 | 0.061947 | -0.02316 | 0.108268 | 0.131428 | 1.353404 |
| PRPF40A   | Pre-mRNA-processi    | 0 | -0.01242 | -0.10692 | 0.024996 | 0.131918 | 1.354932 |
| SORT1     | Sortilin             | 0 | -0.00324 | -0.10815 | 0.023983 | 0.132137 | 1.355618 |
| SLPI      | Antileukoproteina:   | 0 | 0.03179  | 0.012172 | 0.145464 | 0.133292 | 1.359226 |
| AGO3      | Protein argonaute-   | 0 | 0.07494  | -0.02225 | 0.111392 | 0.133637 | 1.360308 |
| U2SURP    | U2 snRNP-associat    | 0 | -0.01704 | -0.0548  | 0.082083 | 0.136881 | 1.370505 |
| RPL28     | 60S ribosomal pro    | 0 | 0.007771 | -0.06028 | 0.077008 | 0.137284 | 1.371778 |
| ZNF609    | Zinc finger protein  | 0 | 0.112828 | -0.00084 | 0.137411 | 0.138248 | 1.374828 |
| HYOU1     | Hypoxia up-regulat   | 0 | 0.036508 | -0.09192 | 0.049983 | 0.1419   | 1.386437 |
| CSDE1     | Cold shock domair    | 0 | -0.03515 | -0.00915 | 0.133015 | 0.142165 | 1.387284 |
| FIBCD1    | Fibrinogen C doma    | 0 | 0.160148 | -0.14555 | 0.0015   | 0.147051 | 1.402978 |
| HNRNPH3   | Heterogeneous nuc    | 0 | -0.0504  | -0.09413 | 0.053624 | 0.147755 | 1.405253 |
| ZNF746    | Zinc finger protein  | 0 | -0.0237  | -0.04429 | 0.104116 | 0.14841  | 1.407376 |
| DLD       | Dihydrolipoyl dehy   | 0 | -0.00326 | -0.09743 | 0.051482 | 0.148909 | 1.408994 |
| HSP90B1   | Endoplasmic          | 0 | -0.11414 | -0.06474 | 0.086419 | 0.151159 | 1.416312 |
| TUBA1C    | Tubulin alpha-1C c   | 0 | -0.02385 | -0.06299 | 0.088872 | 0.151866 | 1.418621 |
| DDX6      | Probable ATP-depe    | 0 | 0.133036 | -0.05856 | 0.093576 | 0.15214  | 1.419514 |
| WDR44     | WD repeat-contain    | 0 | 0.090915 | 0.00241  | 0.154684 | 0.152274 | 1.419954 |
| KIF23     | Kinesin-like protei  | 0 | -0.00589 | -0.10049 | 0.0535   | 0.153993 | 1.425586 |
| NEMF      | Nuclear export me    | 0 | 0.05887  | -0.01365 | 0.141937 | 0.155585 | 1.430819 |
| RPS27L    | 40S ribosomal pro    | 0 | -0.01381 | -0.04227 | 0.114884 | 0.157151 | 1.435989 |
| BMS1      | Ribosome biogene     | 0 | 0.146314 | 0.062439 | 0.220592 | 0.158153 | 1.439306 |
| IMPDH2    | Inosine-5'-monoph    | 0 | 0.033527 | 0.017604 | 0.175876 | 0.158273 | 1.439702 |
| CLTC      | Clathrin heavy chai  | 0 | 0.014646 | -0.06603 | 0.097322 | 0.163356 | 1.456652 |
| SYNCRIP   | Heterogeneous nuc    | 0 | 0.129059 | -0.01183 | 0.151647 | 0.163475 | 1.457053 |
| CRBN      | Protein cereblon (F  | 0 | -0.16271 | -0.16424 | 0.00565  | 0.169888 | 1.478727 |
| SF3A1     | Splicing factor 3A s | 0 | 0.149809 | -0.03573 | 0.13679  | 0.172524 | 1.487731 |
| ANKHD1    | Ankyrin repeat and   | 0 | 0.007966 | -0.16361 | 0.011205 | 0.174817 | 1.495604 |
| TNRC6A    | Trinucleotide repe   | 0 | 0.001043 | -0.05946 | 0.116685 | 0.176145 | 1.500187 |
| ABCF1     | ATP-binding casset   | 0 | 0.170499 | 0.040445 | 0.219707 | 0.179262 | 1.510991 |
| YBX2      | Y-box-binding prot   | 0 | 0.192925 | 0.004631 | 0.184031 | 0.1794   | 1.511472 |
| HIST2H2BF | Histone H2B          | 0 | 0.554322 | 0.256142 | 0.436314 | 0.180172 | 1.514161 |
| PSMD1     | 26S proteasome nc    | 0 | 0.102731 | -0.00988 | 0.171527 | 0.181404 | 1.518464 |
| CIRBP     | Cold-inducible RN    | 0 | 0.046498 | -0.03927 | 0.145608 | 0.18488  | 1.530664 |
| CFB       | Complement facto     | 0 | -0.00659 | -0.14818 | 0.037179 | 0.185362 | 1.532363 |
| JUP       | Junction plakoglo    | 0 | 0.104088 | 0.058636 | 0.246775 | 0.18814  | 1.542197 |
| null      | Ras-related protei   | 0 |          | -0.1914  |          | 0.191398 | 1.553812 |
| CTAGE5    | cTAGE family mem     | 0 | 0.061842 | -0.02775 | 0.166073 | 0.193819 | 1.562495 |
| AHR       | Aryl hydrocarbon r   | 0 | 0.12574  | -0.00116 | 0.192713 | 0.193874 | 1.562693 |

|          |                     |   |          |          |          |          |          |
|----------|---------------------|---|----------|----------|----------|----------|----------|
| MED31    | Mediator of RNA pr  | 0 | 0.119266 | -0.11829 | 0.076445 | 0.194737 | 1.565802 |
| FXR2     | Fragile X mental re | 0 | 0.102717 | -0.03725 | 0.158751 | 0.196001 | 1.570366 |
| ZC3H7B   | Zinc finger CCCH do | 0 | 0.240521 | 0.191107 | 0.389776 | 0.198669 | 1.580045 |
| MSI2     | RNA-binding prote   | 0 | 0.22922  | -0.02225 | 0.177261 | 0.199514 | 1.583122 |
| POLR2B   | DNA-directed RNA    | 0 | -0.01032 | -0.02401 | 0.176514 | 0.200526 | 1.586814 |
| MTHFD1   | C-1-tetrahydrofola  | 0 | 0.046472 | -0.09794 | 0.103284 | 0.201224 | 1.589365 |
| MVP      | Major vault protein | 0 | 0.077318 | -0.08496 | 0.11747  | 0.202429 | 1.593783 |
| DNAH14   | Dynein heavy chain  | 0 | -0.01983 | -0.03346 | 0.169349 | 0.202809 | 1.595177 |
| SEC13    | Protein SEC13 hom   | 0 | -0.00232 | -0.04634 | 0.157698 | 0.204039 | 1.599702 |
| MRPL52   | 39S ribosomal pro   | 0 | -0.10107 | -0.0459  | 0.159226 | 0.205126 | 1.603711 |
| PLOD3    | Procollagen-lysine  | 0 | 0.034809 | -0.08099 | 0.126021 | 0.207016 | 1.610706 |
| PSMD2    | 26S proteasome nc   | 0 | 0.018218 | -0.16002 | 0.051909 | 0.211925 | 1.629014 |
| CALCOCO2 | Calcium-binding ar  | 0 | 0.209315 | -0.03354 | 0.182258 | 0.215797 | 1.643605 |
| PRPF19   | Pre-mRNA-processi   | 0 | 0.10408  | -0.05849 | 0.161274 | 0.219767 | 1.658696 |
| STAU1    | Double-stranded R   | 0 | 0.054397 | -0.18739 | 0.034776 | 0.22217  | 1.667901 |
| S100A9   | Protein S100-A9     | 0 | 0.075274 | 0.034318 | 0.258271 | 0.223953 | 1.674762 |
| EEF1D    | Elongation factor 1 | 0 | -0.38318 | -0.31983 | -0.09467 | 0.225155 | 1.679403 |
| UGDH     | UDP-glucose 6-deh   | 0 | 0.073464 | -0.0466  | 0.18295  | 0.229548 | 1.696477 |
| ABCC12   | Isoform 5 of Multic | 0 | 0.013087 | -0.04344 | 0.186716 | 0.230153 | 1.698842 |
| DRG1     | Developmentally-r   | 0 | 0.030735 | -0.06492 | 0.165686 | 0.230602 | 1.7006   |
| U2AF2    | Splicing factor U2A | 0 | -0.10708 | -0.0794  | 0.151635 | 0.231034 | 1.702291 |
| TRA2B    | Transformer-2 prot  | 0 | 0.187954 | 0.019608 | 0.250766 | 0.231158 | 1.702776 |
| MUL1     | Mitochondrial ubi   | 0 | 0.138024 | -0.03592 | 0.196494 | 0.232411 | 1.707697 |
| ATPIF1   | ATPase inhibitor    | 0 | 0.237965 | 0.083591 | 0.317264 | 0.233673 | 1.712669 |
| EIF3B    | Eukaryotic translat | 0 | 0.079232 | -0.055   | 0.18025  | 0.235255 | 1.718917 |
| RPL35    | 60S ribosomal pro   | 0 | 0.932144 | 0.401013 | 0.639948 | 0.238935 | 1.733546 |
| RTCB     | tRNA-splicing ligas | 0 | 0.113356 | -0.07099 | 0.168171 | 0.239162 | 1.734449 |
| RPL18A   | 60S ribosomal pro   | 0 | -0.12156 | -0.15853 | 0.080993 | 0.239525 | 1.735902 |
| RPN1     | Dolichyl-diphosph   | 0 | -0.04132 | -0.11795 | 0.12275  | 0.240703 | 1.740614 |
| SRSF1    | Serine/arginine-ric | 0 | -0.05114 | -0.00244 | 0.244892 | 0.247336 | 1.767403 |
| HNRNPR   | Isoform 2 of Heterc | 0 | 0.085311 | -0.10837 | 0.139492 | 0.247864 | 1.769554 |
| RECQL5   | ATP-dependent DN    | 0 | 0.231387 | -0.01469 | 0.237325 | 0.252015 | 1.78655  |
| POLR2A   | DNA-directed RNA    | 0 | 0.032088 | -0.03817 | 0.216313 | 0.254479 | 1.796715 |
| AGO1     | Protein argonaute-  | 0 | 0.108796 | -0.0612  | 0.200979 | 0.26218  | 1.828857 |
| EFNA4    | Ephrin-A4           | 0 | 0.032232 | -0.13545 | 0.130577 | 0.266028 | 1.845136 |
| SMG6     | Telomerase-bindin   | 0 | 0.17771  | 0.028117 | 0.295837 | 0.26772  | 1.852335 |
| CPSF2    | Cleavage and polya  | 0 | -0.03753 | -0.02146 | 0.246265 | 0.267724 | 1.852356 |
| G6PD     | Glucose-6-phosph    | 0 | 0.145131 | -0.03623 | 0.238869 | 0.275094 | 1.884059 |
| UNC80    | Protein unc-80 hor  | 0 | 0.013143 | -0.05448 | 0.230895 | 0.285373 | 1.929181 |
| CIR1     | Corepressor intera  | 0 | 0.05765  | -0.01248 | 0.274203 | 0.286684 | 1.935015 |
| MYH9     | Myosin-9            | 0 | -0.17841 | -0.38108 | -0.08937 | 0.29171  | 1.957539 |
| YTHDF2   | YTH domain family   | 0 | 0.192649 | 0.024483 | 0.317903 | 0.29342  | 1.96526  |
| DAP3     | 28S ribosomal pro   | 0 | 0.228435 | -0.07105 | 0.227722 | 0.298768 | 1.989608 |
| S100A7   | Protein S100-A7     | 0 | 0.142002 | 0.003623 | 0.303384 | 0.29976  | 1.994161 |
| AQR      | Aquarius homolog    | 0 | -0.10298 | -0.11256 | 0.193034 | 0.30559  | 2.021108 |
| RPS25    | 40S ribosomal pro   | 0 | 0.762533 | 0.34725  | 0.657856 | 0.310605 | 2.044586 |
| S100A8   | Protein S100-A8     | 0 | 0.145531 | 0.073297 | 0.415921 | 0.342624 | 2.201021 |
| AP1B1    | AP-1 complex subu   | 0 |          | -0.04996 | 0.308498 | 0.358462 | 2.282769 |
| CTNNB1   | Catenin beta-1      | 0 | 0.061049 | -0.02544 | 0.33761  | 0.363051 | 2.307016 |
| FAM208B  | Protein FAM208B     | 0 | 0.001429 | -0.19601 | 0.190912 | 0.386922 | 2.437374 |
| RPL9     | 60S ribosomal pro   | 0 | -0.35539 | -0.26731 | 0.125186 | 0.392499 | 2.468873 |
| RPS17    | 40S ribosomal pro   | 0 | 0.691171 | 0.267415 | 0.699523 | 0.432108 | 2.704629 |

|          |                    |   |          |          |          |          |          |
|----------|--------------------|---|----------|----------|----------|----------|----------|
| HIST1H1B | Histone H1.5       | 0 | 0.609961 | -0.173   | 0.273284 | 0.446279 | 2.794338 |
| PTBP3    | Polypyrimidine tra | 0 | 0.165339 | -0.07318 | 0.400936 | 0.474111 | 2.979278 |
| RBM3     | Putative RNA-bindi | 0 | 0.801874 | 0.590384 | 1.121307 | 0.530923 | 3.395652 |
| RAP1GAP2 | Rap1 GTPase-activ  | 0 | 0.084639 | -0.00186 | 0.720687 | 0.722551 | 5.278989 |

**TS vs. shNT estrogen**
